# Supplementary material
Source: PubMed Central journal article supplement (PMC3571305)
Supplement: EC.00274-12_zek999094051so1.pdf [file EC.00274-12_zek999094051so1.pdf]

# Supplementary table 1

| test_id | locus                                      | sample_1  | sample_2 | status | value_1  | value_2  | log2FC        | test_stat     | p_value    | q_value    | significant |
|---------|--------------------------------------------|-----------|----------|--------|----------|----------|---------------|---------------|------------|------------|-------------|
| AN0004  | ChrVIII_A_nidulans_FGSC_A4:4914420-4920271 | WT_5hasex | WT_veg   | OK     | 2,12597  | 3,44477  | 0,696284      | -1,15371      | 0,248618   | 0,516742   | no          |
| AN0005  | ChrVIII_A_nidulans_FGSC_A4:4911627-4912155 | WT_5hasex | WT_veg   | NOTEST | 0,360943 | 0        | -1.79769e+308 | -1.79769e+308 | 0,165569   | 1          | no          |
| AN0006  | ChrVIII_A_nidulans_FGSC_A4:4910727-4911099 | WT_5hasex | WT_veg   | OK     | 6,25749  | 8,2991   | 0,40737       | -0,419457     | 0,674882   | 0,855384   | no          |
| AN0007  | ChrVIII_A_nidulans_FGSC_A4:4909379-4910315 | WT_5hasex | WT_veg   | NOTEST | 0        | 0        | 0             | 0             | 1          | 1          | no          |
| AN0009  | ChrVIII_A_nidulans_FGSC_A4:4900216-4904305 | WT_5hasex | WT_veg   | NOTEST | 1,93165  | 2,11121  | 0,128234      | -0,176775     | 0,859685   | 1          | no          |
| AN0010  | ChrVIII_A_nidulans_FGSC_A4:4897621-4899199 | WT_5hasex | WT_veg   | OK     | 5,41556  | 7,64954  | 0,498262      | -0,729582     | 0,465646   | 0,724556   | no          |
| AN0011  | ChrVIII_A_nidulans_FGSC_A4:4894569-4896034 | WT_5hasex | WT_veg   | OK     | 7,22562  | 24,6974  | 1,77317       | -2,71284      | 0,00667091 | 0,0376894  | yes         |
| AN0012  | ChrVIII_A_nidulans_FGSC_A4:4890305-4891143 | WT_5hasex | WT_veg   | NOTEST | 0        | 0        | 0             | 0             | 1          | 1          | no          |
| AN0013  | ChrVIII_A_nidulans_FGSC_A4:4884694-4886411 | WT_5hasex | WT_veg   | NOTEST | 0        | 0        | 0             | 0             | 1          | 1          | no          |
| AN0014  | ChrVIII_A_nidulans_FGSC_A4:4882457-4883659 | WT_5hasex | WT_veg   | NOTEST | 0        | 0        | 0             | 0             | 1          | 1          | no          |
| AN0015  | ChrVIII_A_nidulans_FGSC_A4:4871098-4876233 | WT_5hasex | WT_veg   | NOTEST | 0,385136 | 0,180249 | -1,09537      | 0,711835      | 0,476567   | 1          | no          |
| AN0016  | ChrVIII_A_nidulans_FGSC_A4:4850516-4868710 | WT_5hasex | WT_veg   | NOTEST | 0,255638 | 0,131186 | -0,962484     | 1,03332       | 0,301455   | 1          | no          |
| AN0017  | ChrVIII_A_nidulans_FGSC_A4:4849024-4849885 | WT_5hasex | WT_veg   | OK     | 2,82061  | 3,51272  | 0,31658       | -0,334708     | 0,737846   | 0,889854   | no          |
| AN0018  | ChrVIII_A_nidulans_FGSC_A4:4846513-4848316 | WT_5hasex | WT_veg   | OK     | 0,378118 | 4,34483  | 3,52239       | -3,55318      | 0,0003806  | 0,003444   | yes         |
| AN0019  | ChrVIII_A_nidulans_FGSC_A4:4843901-4845381 | WT_5hasex | WT_veg   | NOTEST | 0,549807 | 0,819109 | 0,57513       | -0,404727     | 0,685679   | 1          | no          |
| AN0020  | ChrVIII_A_nidulans_FGSC_A4:4841990-4842598 | WT_5hasex | WT_veg   | NOTEST | 0,509804 | 1,90613  | 1,90263       | -0,836934     | 0,40263    | 1          | no          |
| AN0021  | ChrVIII_A_nidulans_FGSC_A4:4839819-4840539 | WT_5hasex | WT_veg   | NOTEST | 0        | 0        | 0             | 0             | 1          | 1          | no          |
| AN0023  | ChrVIII_A_nidulans_FGSC_A4:4834544-4835927 | WT_5hasex | WT_veg   | OK     | 3,60379  | 8,10321  | 1,16898       | -1,53053      | 0,125887   | 0,337877   | no          |
| AN0024  | ChrVIII_A_nidulans_FGSC_A4:4831869-4833284 | WT_5hasex | WT_veg   | NOTEST | 0,213737 | 0        | -1.79769e+308 | -1.79769e+308 | 0,224063   | 1          | no          |
| AN0025  | ChrVIII_A_nidulans_FGSC_A4:4829756-4831697 | WT_5hasex | WT_veg   | NOTEST | 0        | 0        | 0             | 0             | 1          | 1          | no          |
| AN0026  | ChrVIII_A_nidulans_FGSC_A4:4827067-4829243 | WT_5hasex | WT_veg   | NOTEST | 0        | 0        | 0             | 0             | 1          | 1          | no          |
| AN0027  | ChrVIII_A_nidulans_FGSC_A4:4825302-4827007 | WT_5hasex | WT_veg   | NOTEST | 0        | 0        | 0             | 0             | 1          | 1          | no          |
| AN0028  | ChrVIII_A_nidulans_FGSC_A4:4823699-4824915 | WT_5hasex | WT_veg   | NOTEST | 0,638649 | 3,06335  | 2,26201       | -2,16205      | 0,0306142  | 1          | no          |
| AN0029  | ChrVIII_A_nidulans_FGSC_A4:4821464-4823218 | WT_5hasex | WT_veg   | NOTEST | 0,713612 | 0,51962  | -0,457681     | 0,303755      | 0,761314   | 1          | no          |
| AN0030  | ChrVIII_A_nidulans_FGSC_A4:4814161-4815730 | WT_5hasex | WT_veg   | OK     | 0,803964 | 5,33271  | 2,72967       | -2,95251      | 0,00315199 | 0,0203713  | yes         |
| AN0031  | ChrVIII_A_nidulans_FGSC_A4:4812355-4813933 | WT_5hasex | WT_veg   | OK     | 10,0029  | 43,0269  | 2,10482       | -3,42087      | 0,00062421 | 0,00526216 | yes         |
| AN0032  | ChrVIII_A_nidulans_FGSC_A4:4811391-4811990 | WT_5hasex | WT_veg   | NOTEST | 0,728037 | 0        | -1.79769e+308 | -1.79769e+308 | 0,137528   | 1          | no          |
| AN0033  | ChrVIII_A_nidulans_FGSC_A4:4809844-4811081 | WT_5hasex | WT_veg   | OK     | 4,49865  | 11,6702  | 1,37527       | -1,86168      | 0,0626485  | 0,208359   | no          |
| AN0034  | ChrVIII_A_nidulans_FGSC_A4:4806822-4808836 | WT_5hasex | WT_veg   | OK     | 20,0647  | 120,449  | 2,58569       | -4,50206      | 6,7298E-06 | 0,00010099 | yes         |
| AN0035  | ChrVIII_A_nidulans_FGSC_A4:4801808-4803666 | WT_5hasex | WT_veg   | NOTEST | 0,267264 | 0        | -1.79769e+308 | -1.79769e+308 | 0,224063   | 1          | no          |
| AN0036  | ChrVIII_A_nidulans_FGSC_A4:4800068-4801219 | WT_5hasex | WT_veg   | NOTEST | 0,543269 | 3,15676  | 2,53871       | -2,39927      | 0,0164279  | 1          | no          |
| AN0039  | ChrVIII_A_nidulans_FGSC_A4:4779624-4781285 | WT_5hasex | WT_veg   | OK     | 8,53195  | 19,3308  | 1,17995       | -1,97455      | 0,0483187  | 0,173412   | no          |
| AN0040  | ChrVIII_A_nidulans_FGSC_A4:4775775-4779226 | WT_5hasex | WT_veg   | OK     | 12,2189  | 13,5723  | 0,15155       | -0,30167      | 0,762904   | 0,902166   | no          |
| AN0041  | ChrVIII_A_nidulans_FGSC_A4:4774331-4774603 | WT_5hasex | WT_veg   | OK     | 3,11543  | 18,619   | 2,57928       | -1,8986       | 0,057617   | 0,196195   | no          |
| AN0042  | ChrVIII_A_nidulans_FGSC_A4:4772053-4773936 | WT_5hasex | WT_veg   | OK     | 15,6086  | 19,7536  | 0,339775      | -0,629428     | 0,529069   | 0,768894   | no          |
| AN0043  | ChrVIII_A_nidulans_FGSC_A4:4770368-4771612 | WT_5hasex | WT_veg   | OK     | 19,5101  | 67,4958  | 1,79058       | -3,26871      | 0,0010804  | 0,00837381 | yes         |
| AN0044  | ChrVIII_A_nidulans_FGSC_A4:4766398-4770007 | WT_5hasex | WT_veg   | OK     | 3,86566  | 8,10596  | 1,06827       | -1,80816      | 0,0705814  | 0,226978   | no          |
| AN0045  | ChrVIII_A_nidulans_FGSC_A4:4764731-4766336 | WT_5hasex | WT_veg   | OK     | 675,819  | 9831,42  | 3,86269       | -4,75356      | 1,9986E-06 | 3,4373E-05 | yes         |
| AN0046  | ChrVIII_A_nidulans_FGSC_A4:4762490-4764478 | WT_5hasex | WT_veg   | OK     | 112,473  | 257,732  | 1,1963        | -2,43508      | 0,0148885  | 0,0711329  | no          |
| AN0048  | ChrVIII_A_nidulans_FGSC_A4:4755903-4758327 | WT_5hasex | WT_veg   | OK     | 4,12193  | 6,26933  | 0,604992      | -0,927939     | 0,353439   | 0,629001   | no          |
| AN0049  | ChrVIII_A_nidulans_FGSC_A4:4754476-4755491 | WT_5hasex | WT_veg   | OK     | 45,1255  | 49,3072  | 0,127857      | -0,249723     | 0,802802   | 0,920364   | no          |
| AN0050  | ChrVIII_A_nidulans_FGSC_A4:4748990-4750182 | WT_5hasex | WT_veg   | OK     | 113,143  | 212,933  | 0,912248      | -1,42527      | 0,15408    | 0,385767   | no          |
| AN0051  | ChrVIII_A_nidulans_FGSC_A4:4747392-4748609 | WT_5hasex | WT_veg   | OK     | 142,582  | 396,65   | 1,47607       | -2,27318      | 0,0230151  | 0,0990423  | no          |
| AN0052  | ChrVIII_A_nidulans_FGSC_A4:4746266-4747258 | WT_5hasex | WT_veg   | OK     | 98,0011  | 62,211   | -0,655628     | 1,26689       | 0,205196   | 0,461647   | no          |
| AN0053  | ChrVIII_A_nidulans_FGSC_A4:4744983-4745847 | WT_5hasex | WT_veg   | OK     | 67,479   | 77,6105  | 0,201813      | -0,40501      | 0,68547    | 0,861637   | no          |
| AN0054  | ChrVIII_A_nidulans_FGSC_A4:4739984-4741971 | WT_5hasex | WT_veg   | OK     | 235,769  | 218,74   | -0,108156     | 0,199299      | 0,842029   | 0,937552   | no          |
| AN0056  | ChrVIII_A_nidulans_FGSC_A4:4733546-4735434 | WT_5hasex | WT_veg   | OK     | 37,4486  | 338,174  | 3,17478       | -6,04296      | 1,5131E-09 | 5,1454E-08 | yes         |
| AN0057  | ChrVIII_A_nidulans_FGSC_A4:4728142-4729467 | WT_5hasex | WT_veg   | OK     | 57,6779  | 93,2287  | 0,692755      | -1,40944      | 0,158705   | 0,393586   | no          |
| AN0058  | ChrVIII_A_nidulans_FGSC_A4:4726361-4727612 | WT_5hasex | WT_veg   | OK     | 2,03034  | 5,87148  | 1,532         | -1,82679      | 0,0677321  | 0,220234   | no          |
| AN0059  | ChrVIII_A_nidulans_FGSC_A4:4724343-4725651 | WT_5hasex | WT_veg   | OK     | 6,38992  | 13,6329  | 1,09322       | -1,68359      | 0,0922607  | 0,273747   | no          |
| AN0061  | ChrVIII_A_nidulans_FGSC_A4:4717762-4719633 | WT_5hasex | WT_veg   | OK     | 139,293  | 868,528  | 2,64045       | -5,23258      | 1,6716E-07 | 3,6882E-06 | yes         |
| AN0062  | ChrVIII_A_nidulans_FGSC_A4:4717762-4719633 | WT_5hasex | WT_veg   | OK     | 19,1859  | 44,1501  | 1,20237       | -2,0076       | 0,0446855  | 0,163738   | no          |

## Supplementary table 1

|        |                                            |           |        |        |          |         |               |               |            |            |     |
|--------|--------------------------------------------|-----------|--------|--------|----------|---------|---------------|---------------|------------|------------|-----|
| AN0063 | ChrVIII_A_nidulans_FGSC_A4:4715202-4717107 | WT_5hasex | WT_veg | OK     | 45,4153  | 49,2643 | 0,117364      | -0,239945     | 0,810373   | 0,923961   | no  |
| AN0064 | ChrVIII_A_nidulans_FGSC_A4:4713117-4714721 | WT_5hasex | WT_veg | OK     | 19,2996  | 21,1725 | 0,133622      | -0,253172     | 0,800135   | 0,919339   | no  |
| AN0065 | ChrVIII_A_nidulans_FGSC_A4:4711663-4712857 | WT_5hasex | WT_veg | OK     | 23,4796  | 27,5759 | 0,231999      | -0,427568     | 0,668966   | 0,851909   | no  |
| AN0066 | ChrVIII_A_nidulans_FGSC_A4:4709834-4711308 | WT_5hasex | WT_veg | OK     | 40,1174  | 76,8854 | 0,938482      | -1,85618      | 0,0634273  | 0,210126   | no  |
| AN0067 | ChrVIII_A_nidulans_FGSC_A4:4707089-4708820 | WT_5hasex | WT_veg | OK     | 149,628  | 285,008 | 0,929622      | -1,86822      | 0,0617307  | 0,206283   | no  |
| AN0068 | ChrVIII_A_nidulans_FGSC_A4:4706211-4706889 | WT_5hasex | WT_veg | OK     | 70,9664  | 122,365 | 0,785985      | -1,55958      | 0,11886    | 0,325674   | no  |
| AN0071 | ChrVIII_A_nidulans_FGSC_A4:4696732-4700512 | WT_5hasex | WT_veg | OK     | 44,3821  | 86,6656 | 0,965483      | -1,96764      | 0,049109   | 0,175396   | no  |
| AN0072 | ChrVIII_A_nidulans_FGSC_A4:4695138-4696366 | WT_5hasex | WT_veg | OK     | 22,0221  | 74,7037 | 1,76223       | -3,25343      | 0,00114019 | 0,00874792 | yes |
| AN0073 | ChrVIII_A_nidulans_FGSC_A4:4691012-4694821 | WT_5hasex | WT_veg | OK     | 20,5025  | 55,4868 | 1,43634       | -2,80295      | 0,00506382 | 0,300046   | yes |
| AN0074 | ChrVIII_A_nidulans_FGSC_A4:4691012-4694821 | WT_5hasex | WT_veg | OK     | 37,3422  | 128,411 | 1,78189       | -3,6273       | 0,0002864  | 0,00271295 | yes |
| AN0076 | ChrVIII_A_nidulans_FGSC_A4:4685654-4688558 | WT_5hasex | WT_veg | OK     | 97,0324  | 62,5388 | -0,633715     | 1,265         | 0,20587    | 0,462498   | no  |
| AN0077 | ChrVIII_A_nidulans_FGSC_A4:4683920-4685357 | WT_5hasex | WT_veg | OK     | 31,6515  | 51,9053 | 0,713606      | -1,21674      | 0,223705   | 0,485649   | no  |
| AN0080 | ChrVIII_A_nidulans_FGSC_A4:4673090-4673873 | WT_5hasex | WT_veg | OK     | 3,72133  | 14,9811 | 2,00926       | -2,46056      | 0,0138721  | 0,0673327  | no  |
| AN0083 | ChrVIII_A_nidulans_FGSC_A4:4664600-4666244 | WT_5hasex | WT_veg | OK     | 109,426  | 205,879 | 0,911839      | -1,88441      | 0,0595095  | 0,20116    | no  |
| AN0084 | ChrVIII_A_nidulans_FGSC_A4:4662944-4664366 | WT_5hasex | WT_veg | OK     | 287,263  | 436,459 | 0,603476      | -1,19557      | 0,231863   | 0,496166   | no  |
| AN0085 | ChrVIII_A_nidulans_FGSC_A4:4660129-4662526 | WT_5hasex | WT_veg | OK     | 106,278  | 122,089 | 0,200079      | -0,402186     | 0,687547   | 0,862691   | no  |
| AN0086 | ChrVIII_A_nidulans_FGSC_A4:4656524-4658697 | WT_5hasex | WT_veg | OK     | 103,638  | 144,788 | 0,482389      | -0,989388     | 0,322473   | 0,598698   | no  |
| AN0087 | ChrVIII_A_nidulans_FGSC_A4:4652443-4654532 | WT_5hasex | WT_veg | OK     | 19,5212  | 33,5492 | 0,781235      | -1,51873      | 0,128829   | 0,343331   | no  |
| AN0088 | ChrVIII_A_nidulans_FGSC_A4:4650696-4652418 | WT_5hasex | WT_veg | OK     | 48,7876  | 68,5192 | 0,489993      | -0,976686     | 0,328725   | 0,605135   | no  |
| AN0090 | ChrVIII_A_nidulans_FGSC_A4:4648079-4648819 | WT_5hasex | WT_veg | OK     | 39,5467  | 43,3921 | 0,133876      | -0,23925      | 0,810912   | 0,924189   | no  |
| AN0091 | ChrVIII_A_nidulans_FGSC_A4:4646137-4647700 | WT_5hasex | WT_veg | OK     | 46,6989  | 129,512 | 1,47162       | -2,83594      | 0,00456916 | 0,0276701  | yes |
| AN0092 | ChrVIII_A_nidulans_FGSC_A4:4643142-4645797 | WT_5hasex | WT_veg | OK     | 19,4711  | 153,003 | 2,97415       | -6,00695      | 1,8904E-09 | 6,2539E-08 | yes |
| AN0093 | ChrVIII_A_nidulans_FGSC_A4:4640118-4642856 | WT_5hasex | WT_veg | OK     | 47,859   | 90,6436 | 0,921416      | -1,87237      | 0,0611559  | 0,204893   | no  |
| AN0094 | ChrVIII_A_nidulans_FGSC_A4:4636907-4639781 | WT_5hasex | WT_veg | OK     | 39,1399  | 38,5919 | -0,0203397    | 0,04204       | 0,966467   | 0,98772    | no  |
| AN0095 | ChrVIII_A_nidulans_FGSC_A4:4632764-4634499 | WT_5hasex | WT_veg | OK     | 12,3261  | 19,0115 | 0,625153      | -1,12507      | 0,260558   | 0,530985   | no  |
| AN0096 | ChrVIII_A_nidulans_FGSC_A4:4628639-4632093 | WT_5hasex | WT_veg | OK     | 7,23592  | 6,63628 | -0,124802     | 0,224267      | 0,822549   | 0,929108   | no  |
| AN0097 | ChrVIII_A_nidulans_FGSC_A4:4624823-4628267 | WT_5hasex | WT_veg | OK     | 20,4623  | 87,5354 | 2,0969        | -4,24036      | 2,2316E-05 | 0,00029385 | yes |
| AN0099 | ChrVIII_A_nidulans_FGSC_A4:4615837-4616800 | WT_5hasex | WT_veg | NOTEST | 0,369072 | 0       | -1.79769e+308 | -1.79769e+308 | 0,224063   | 1          | no  |
| AN0100 | ChrVIII_A_nidulans_FGSC_A4:4613961-4615108 | WT_5hasex | WT_veg | NOTEST | 0,378815 | 0       | -1.79769e+308 | -1.79769e+308 | 0,224063   | 1          | no  |
| AN0101 | ChrVIII_A_nidulans_FGSC_A4:4612788-4613642 | WT_5hasex | WT_veg | NOTEST | 0        | 0       | 0             | 0             | 1          | 1          | no  |
| AN0102 | ChrVIII_A_nidulans_FGSC_A4:4610061-4611330 | WT_5hasex | WT_veg | NOTEST | 0        | 0       | 0             | 0             | 1          | 1          | no  |
| AN0103 | ChrVIII_A_nidulans_FGSC_A4:4603388-4605178 | WT_5hasex | WT_veg | OK     | 19,7474  | 25,1079 | 0,346479      | -0,639119     | 0,522745   | 0,764994   | no  |
| AN0104 | ChrVIII_A_nidulans_FGSC_A4:4600677-4602038 | WT_5hasex | WT_veg | OK     | 21,3309  | 61,2924 | 1,52276       | -2,80619      | 0,00501309 | 0,0297875  | yes |
| AN0105 | ChrVIII_A_nidulans_FGSC_A4:4600078-4600539 | WT_5hasex | WT_veg | OK     | 26,325   | 98,0764 | 1,89747       | -3,05222      | 0,00227159 | 0,0155217  | yes |
| AN0107 | ChrVIII_A_nidulans_FGSC_A4:4592524-4593508 | WT_5hasex | WT_veg | NOTEST | 0,737352 | 3,58334 | 2,28088       | -2,15888      | 0,0308593  | 1          | no  |
| AN0108 | ChrVIII_A_nidulans_FGSC_A4:4586933-4590792 | WT_5hasex | WT_veg | OK     | 13,7186  | 29,6088 | 1,10989       | -2,23667      | 0,0253077  | 0,106453   | no  |
| AN0109 | ChrVIII_A_nidulans_FGSC_A4:4585557-4586549 | WT_5hasex | WT_veg | OK     | 66,8472  | 147,71  | 1,14383       | -2,30808      | 0,0209949  | 0,0925451  | no  |
| AN0110 | ChrVIII_A_nidulans_FGSC_A4:4584218-4585392 | WT_5hasex | WT_veg | OK     | 199,719  | 239,67  | 0,263079      | -0,540611     | 0,588776   | 0,806406   | no  |
| AN0111 | ChrVIII_A_nidulans_FGSC_A4:4581166-4583901 | WT_5hasex | WT_veg | OK     | 55,5195  | 70,1884 | 0,338238      | -0,698551     | 0,484833   | 0,738952   | no  |
| AN0112 | ChrVIII_A_nidulans_FGSC_A4:4575225-4580254 | WT_5hasex | WT_veg | OK     | 13,5514  | 10,5183 | -0,365532     | 0,745654      | 0,455876   | 0,717048   | no  |
| AN0114 | ChrVIII_A_nidulans_FGSC_A4:4566817-4568760 | WT_5hasex | WT_veg | OK     | 6,49187  | 14,2094 | 1,13014       | -1,8715       | 0,0612755  | 0,205181   | no  |
| AN0116 | ChrVIII_A_nidulans_FGSC_A4:4555075-4555635 | WT_5hasex | WT_veg | OK     | 125,324  | 442,262 | 1,81924       | -3,66342      | 0,00024887 | 0,00240526 | yes |
| AN0117 | ChrVIII_A_nidulans_FGSC_A4:4553065-4554620 | WT_5hasex | WT_veg | OK     | 250,162  | 647,402 | 1,3718        | -2,67947      | 0,00737385 | 0,0408202  | yes |
| AN0121 | ChrVIII_A_nidulans_FGSC_A4:4531499-4532725 | WT_5hasex | WT_veg | OK     | 51,855   | 77,3003 | 0,575989      | -1,16324      | 0,24473    | 0,5123     | no  |
| AN0122 | ChrVIII_A_nidulans_FGSC_A4:4527898-4530898 | WT_5hasex | WT_veg | OK     | 78,9994  | 146,955 | 0,895465      | -1,83154      | 0,0670206  | 0,21864    | no  |
| AN0123 | ChrVIII_A_nidulans_FGSC_A4:4526741-4527507 | WT_5hasex | WT_veg | OK     | 68,0151  | 159,767 | 1,23204       | -2,44302      | 0,0145649  | 0,0699567  | no  |
| AN0124 | ChrVIII_A_nidulans_FGSC_A4:4525021-4526381 | WT_5hasex | WT_veg | OK     | 25,3654  | 102,987 | 2,02153       | -3,88085      | 0,00010409 | 0,0011359  | yes |
| AN0126 | ChrVIII_A_nidulans_FGSC_A4:4516233-4518613 | WT_5hasex | WT_veg | OK     | 5,64041  | 7,31367 | 0,374794      | -0,614571     | 0,538838   | 0,774754   | no  |
| AN0127 | ChrVIII_A_nidulans_FGSC_A4:4514400-4515922 | WT_5hasex | WT_veg | OK     | 41,0439  | 35,6855 | -0,201831     | 0,404381      | 0,685933   | 0,861869   | no  |
| AN0128 | ChrVIII_A_nidulans_FGSC_A4:4510242-4513779 | WT_5hasex | WT_veg | OK     | 7,93467  | 13,7471 | 0,792885      | -1,47117      | 0,141246   | 0,364605   | no  |
| AN0129 | ChrVIII_A_nidulans_FGSC_A4:4505670-4507950 | WT_5hasex | WT_veg | OK     | 93,1163  | 82,9995 | -0,165933     | 0,335008      | 0,737619   | 0,889795   | no  |
| AN0130 | ChrVIII_A_nidulans_FGSC_A4:4501648-4502968 | WT_5hasex | WT_veg | OK     | 3,49408  | 11,7061 | 1,74427       | -2,46849      | 0,0135684  | 0,0661714  | no  |
| AN0131 | ChrVIII_A_nidulans_FGSC_A4:4500818-4501493 | WT_5hasex | WT_veg | OK     | 115,203  | 68,965  | -0,740236     | 1,48923       | 0,136428   | 0,356562   | no  |

## Supplementary table 1

|        |                                            |           |        |        |          |          |               |               |            |            |     |
|--------|--------------------------------------------|-----------|--------|--------|----------|----------|---------------|---------------|------------|------------|-----|
| AN0132 | ChrVIII_A_nidulans_FGSC_A4:4498288-4500454 | WT_5hasex | WT_veg | OK     | 39,7059  | 29,9603  | -0,406303     | 0,83007       | 0,406499   | 0,677114   | no  |
| AN0133 | ChrVIII_A_nidulans_FGSC_A4:4495378-4497825 | WT_5hasex | WT_veg | OK     | 21,8452  | 77,0364  | 1,81822       | -3,70008      | 0,00021553 | 0,00212352 | yes |
| AN0135 | ChrVIII_A_nidulans_FGSC_A4:4487580-4490736 | WT_5hasex | WT_veg | OK     | 63,6322  | 109,623  | 0,784722      | -1,49518      | 0,134867   | 0,35389    | no  |
| AN0136 | ChrVIII_A_nidulans_FGSC_A4:4485405-4486009 | WT_5hasex | WT_veg | NOTEST | 0        | 2,79062  | 1.79769e+308  | 1.79769e+308  | 0,123323   | 1          | no  |
| AN0137 | ChrVIII_A_nidulans_FGSC_A4:4480722-4484775 | WT_5hasex | WT_veg | OK     | 62,6612  | 119,937  | 0,936627      | -1,71309      | 0,0866954  | 0,262314   | no  |
| AN0138 | ChrVIII_A_nidulans_FGSC_A4:4479057-4480299 | WT_5hasex | WT_veg | OK     | 10,8088  | 13,7681  | 0,349119      | -0,567842     | 0,570142   | 0,795219   | no  |
| AN0139 | ChrVIII_A_nidulans_FGSC_A4:4476507-4478248 | WT_5hasex | WT_veg | OK     | 2,76655  | 5,61138  | 1,02027       | -1,39385      | 0,163362   | 0,400312   | no  |
| AN0140 | ChrVIII_A_nidulans_FGSC_A4:4473947-4475689 | WT_5hasex | WT_veg | OK     | 180,81   | 238,523  | 0,399653      | -0,80607      | 0,420202   | 0,688387   | no  |
| AN0141 | ChrVIII_A_nidulans_FGSC_A4:4472157-4473886 | WT_5hasex | WT_veg | OK     | 6,49559  | 43,402   | 2,74023       | -4,43937      | 9,0222E-06 | 0,00013136 | yes |
| AN0142 | ChrVIII_A_nidulans_FGSC_A4:4470456-4471892 | WT_5hasex | WT_veg | OK     | 63,9716  | 175,553  | 1,4564        | -2,98794      | 0,00280867 | 0,0184973  | yes |
| AN0143 | ChrVIII_A_nidulans_FGSC_A4:4469673-4470275 | WT_5hasex | WT_veg | OK     | 29,4368  | 79,8075  | 1,4389        | -2,43463      | 0,0149069  | 0,0711852  | no  |
| AN0144 | ChrVIII_A_nidulans_FGSC_A4:4465571-4467710 | WT_5hasex | WT_veg | OK     | 19,5764  | 44,2194  | 1,17557       | -2,29053      | 0,0219906  | 0,095766   | no  |
| AN0153 | ChrVIII_A_nidulans_FGSC_A4:4432717-4435471 | WT_5hasex | WT_veg | OK     | 17,324   | 35,5826  | 1,0384        | -2,07585      | 0,0379079  | 0,144943   | no  |
| AN0154 | ChrVIII_A_nidulans_FGSC_A4:4431441-4432479 | WT_5hasex | WT_veg | OK     | 21,2987  | 29,0353  | 0,447046      | -0,778005     | 0,436566   | 0,701639   | no  |
| AN0156 | ChrVIII_A_nidulans_FGSC_A4:4423753-4425606 | WT_5hasex | WT_veg | OK     | 20,6611  | 46,8648  | 1,18159       | -2,30623      | 0,0210977  | 0,0928538  | no  |
| AN0157 | ChrVIII_A_nidulans_FGSC_A4:4421431-4422498 | WT_5hasex | WT_veg | NOTEST | 0,822949 | 2,69223  | 1,70993       | -1,43301      | 0,151856   | 1          | no  |
| AN0158 | ChrVIII_A_nidulans_FGSC_A4:4420117-4421315 | WT_5hasex | WT_veg | OK     | 92,7901  | 128,714  | 0,472125      | -0,974381     | 0,329867   | 0,606261   | no  |
| AN0159 | ChrVIII_A_nidulans_FGSC_A4:4415377-4418385 | WT_5hasex | WT_veg | OK     | 27,4542  | 5,3969   | -2,34682      | 4,31565       | 1,5914E-05 | 0,0002187  | yes |
| AN0160 | ChrVIII_A_nidulans_FGSC_A4:4413907-4414858 | WT_5hasex | WT_veg | OK     | 26,4072  | 45,2014  | 0,775437      | -1,42768      | 0,153383   | 0,384692   | no  |
| AN0161 | ChrVIII_A_nidulans_FGSC_A4:4411488-4413423 | WT_5hasex | WT_veg | OK     | 59,3383  | 72,2508  | 0,284051      | -0,586759     | 0,557366   | 0,786992   | no  |
| AN0162 | ChrVIII_A_nidulans_FGSC_A4:4408979-4411340 | WT_5hasex | WT_veg | OK     | 64,3563  | 138,008  | 1,1006        | -2,29176      | 0,0219196  | 0,0955205  | no  |
| AN0163 | ChrVIII_A_nidulans_FGSC_A4:4405551-4406679 | WT_5hasex | WT_veg | OK     | 197,505  | 252,435  | 0,354019      | -0,690036     | 0,490172   | 0,742753   | no  |
| AN0164 | ChrVIII_A_nidulans_FGSC_A4:4404537-4405538 | WT_5hasex | WT_veg | OK     | 48,7331  | 50,7498  | 0,0584992     | -0,115999     | 0,907653   | 0,964677   | no  |
| AN0165 | ChrVIII_A_nidulans_FGSC_A4:4401063-4403839 | WT_5hasex | WT_veg | OK     | 18,8843  | 32,1804  | 0,768991      | -1,55433      | 0,120105   | 0,3279     | no  |
| AN0166 | ChrVIII_A_nidulans_FGSC_A4:4398520-4400860 | WT_5hasex | WT_veg | OK     | 46,5301  | 130,734  | 1,49039       | -3,08685      | 0,0020229  | 0,0141075  | yes |
| AN0167 | ChrVIII_A_nidulans_FGSC_A4:4396928-4398277 | WT_5hasex | WT_veg | OK     | 43,2643  | 47,6654  | 0,139764      | -0,282895     | 0,777257   | 0,908905   | no  |
| AN0168 | ChrVIII_A_nidulans_FGSC_A4:4389598-4391884 | WT_5hasex | WT_veg | OK     | 34,3498  | 150,528  | 2,13166       | -4,48595      | 7,259E-06  | 0,00010837 | yes |
| AN0169 | ChrVIII_A_nidulans_FGSC_A4:4388862-4389376 | WT_5hasex | WT_veg | OK     | 21,3046  | 67,1501  | 1,65623       | -2,6619       | 0,00777013 | 0,0425821  | yes |
| AN0171 | ChrVIII_A_nidulans_FGSC_A4:4384612-4385972 | WT_5hasex | WT_veg | OK     | 3,90003  | 3,43445  | -0,183407     | 0,218762      | 0,826836   | 0,931115   | no  |
| AN0172 | ChrVIII_A_nidulans_FGSC_A4:4376390-4378904 | WT_5hasex | WT_veg | OK     | 3,89892  | 2,21719  | -0,81434      | 1,14821       | 0,250883   | 0,519528   | no  |
| AN0173 | ChrVIII_A_nidulans_FGSC_A4:4373559-4375111 | WT_5hasex | WT_veg | OK     | 8,89286  | 16,0061  | 0,847907      | -1,40168      | 0,16101    | 0,396598   | no  |
| AN0174 | ChrVIII_A_nidulans_FGSC_A4:4371109-4372432 | WT_5hasex | WT_veg | OK     | 18,9319  | 42,1838  | 1,15587       | -1,90634      | 0,0566056  | 0,193751   | no  |
| AN0177 | ChrVIII_A_nidulans_FGSC_A4:4363124-4363403 | WT_5hasex | WT_veg | NOTEST | 0        | 0        | 0             | 0             | 1          | 1          | no  |
| AN0178 | ChrVIII_A_nidulans_FGSC_A4:4361318-4362951 | WT_5hasex | WT_veg | OK     | 17,3813  | 11,9848  | -0,536328     | 0,894101      | 0,371268   | 0,646051   | no  |
| AN0179 | ChrVIII_A_nidulans_FGSC_A4:4356848-4358133 | WT_5hasex | WT_veg | OK     | 148,392  | 283,478  | 0,933823      | -1,78597      | 0,0741048  | 0,234623   | no  |
| AN0180 | ChrVIII_A_nidulans_FGSC_A4:4355797-4356737 | WT_5hasex | WT_veg | OK     | 1,56272  | 5,60814  | 1,84346       | -2,07465      | 0,0380186  | 0,145261   | no  |
| AN0181 | ChrVIII_A_nidulans_FGSC_A4:4353937-4355006 | WT_5hasex | WT_veg | OK     | 17,113   | 5,12838  | -1,73851      | 2,56238       | 0,0103956  | 0,0537388  | no  |
| AN0183 | ChrVIII_A_nidulans_FGSC_A4:4348692-4349673 | WT_5hasex | WT_veg | OK     | 170,087  | 244,656  | 0,524479      | -1,08771      | 0,276722   | 0,549917   | no  |
| AN0184 | ChrVIII_A_nidulans_FGSC_A4:4347509-4348293 | WT_5hasex | WT_veg | OK     | 137,445  | 146,291  | 0,0899893     | -0,183614     | 0,854316   | 0,943067   | no  |
| AN0186 | ChrVIII_A_nidulans_FGSC_A4:4343646-4345223 | WT_5hasex | WT_veg | OK     | 415,56   | 238,747  | -0,799574     | 1,42291       | 0,154761   | 0,386862   | no  |
| AN0187 | ChrVIII_A_nidulans_FGSC_A4:4341214-4341615 | WT_5hasex | WT_veg | NOTEST | 1,21456  | 0        | -1.79769e+308 | -1.79769e+308 | 0,165569   | 1          | no  |
| AN0189 | ChrVIII_A_nidulans_FGSC_A4:4334400-4335267 | WT_5hasex | WT_veg | OK     | 3,48922  | 6,94241  | 0,992529      | -1,24306      | 0,213846   | 0,473185   | no  |
| AN0190 | ChrVIII_A_nidulans_FGSC_A4:4332493-4333752 | WT_5hasex | WT_veg | OK     | 31,6422  | 98,7533  | 1,64198       | -3,22339      | 0,00126683 | 0,00954217 | yes |
| AN0191 | ChrVIII_A_nidulans_FGSC_A4:4330732-4332028 | WT_5hasex | WT_veg | OK     | 23,9158  | 75,6384  | 1,66116       | -3,14007      | 0,00168909 | 0,0121249  | yes |
| AN0192 | ChrVIII_A_nidulans_FGSC_A4:4329818-4330600 | WT_5hasex | WT_veg | OK     | 51,3463  | 243,073  | 2,24306       | -4,29431      | 1,7524E-05 | 0,00023802 | yes |
| AN0193 | ChrVIII_A_nidulans_FGSC_A4:4328771-4329816 | WT_5hasex | WT_veg | OK     | 49,9026  | 94,7117  | 0,924429      | -1,85496      | 0,0636026  | 0,21053    | no  |
| AN0195 | ChrVIII_A_nidulans_FGSC_A4:4322704-4324441 | WT_5hasex | WT_veg | NOTEST | 0,781339 | 0,401176 | -0,961711     | 0,625813      | 0,531438   | 1          | no  |
| AN0196 | ChrVIII_A_nidulans_FGSC_A4:4321268-4322661 | WT_5hasex | WT_veg | NOTEST | 0,149137 | 0,607512 | -0,202628     | -0,852378     | 0,394004   | 1          | no  |
| AN0197 | ChrVIII_A_nidulans_FGSC_A4:4316969-4319576 | WT_5hasex | WT_veg | OK     | 2,45917  | 0,838695 | -1,55195      | 1,4241        | 0,154417   | 0,386351   | no  |
| AN0198 | ChrVIII_A_nidulans_FGSC_A4:4315935-4316855 | WT_5hasex | WT_veg | OK     | 7,59459  | 14,8216  | 0,964654      | -1,41938      | 0,155789   | 0,388468   | no  |
| AN0200 | ChrVIII_A_nidulans_FGSC_A4:4311281-4312293 | WT_5hasex | WT_veg | OK     | 38,2384  | 75,3854  | 0,979264      | -1,77886      | 0,075262   | 0,237312   | no  |
| AN0201 | ChrVIII_A_nidulans_FGSC_A4:4308613-4310437 | WT_5hasex | WT_veg | OK     | 17,2229  | 45,3373  | 1,39637       | -2,61188      | 0,00900458 | 0,0479921  | yes |
| AN0203 | ChrVIII_A_nidulans_FGSC_A4:4303963-4305380 | WT_5hasex | WT_veg | OK     | 6,62875  | 8,03068  | 0,276786      | -0,418886     | 0,675299   | 0,855621   | no  |

## Supplementary table 1

|        |                                            |           |        |        |          |          |           |           |            |            |     |
|--------|--------------------------------------------|-----------|--------|--------|----------|----------|-----------|-----------|------------|------------|-----|
| AN0204 | ChrVIII_A_nidulans_FGSC_A4:4301514-4303917 | WT_5hasex | WT_veg | OK     | 9,00422  | 51,9585  | 2,52869   | -4,49786  | 6,8641E-06 | 0,00010286 | yes |
| AN0206 | ChrVIII_A_nidulans_FGSC_A4:4297013-4299522 | WT_5hasex | WT_veg | OK     | 35,1213  | 60,0536  | 0,773906  | -1,6005   | 0,109488   | 0,308395   | no  |
| AN0207 | ChrVIII_A_nidulans_FGSC_A4:4294939-4296632 | WT_5hasex | WT_veg | OK     | 9,37082  | 10,9332  | 0,222471  | -0,374893 | 0,70774    | 0,873848   | no  |
| AN0208 | ChrVIII_A_nidulans_FGSC_A4:4291949-4293159 | WT_5hasex | WT_veg | OK     | 5,92421  | 10,219   | 0,786561  | -1,12787  | 0,259375   | 0,529588   | no  |
| AN0210 | ChrVIII_A_nidulans_FGSC_A4:4284329-4287215 | WT_5hasex | WT_veg | OK     | 74,2002  | 127,023  | 0,775596  | -1,57322  | 0,115668   | 0,319437   | no  |
| AN0211 | ChrVIII_A_nidulans_FGSC_A4:4282548-4283561 | WT_5hasex | WT_veg | OK     | 51,0807  | 126,14   | 1,30417   | -2,56119  | 0,0104315  | 0,0538607  | no  |
| AN0212 | ChrVIII_A_nidulans_FGSC_A4:4280935-4281941 | WT_5hasex | WT_veg | OK     | 33,6675  | 109,048  | 1,69554   | -3,1727   | 0,00151028 | 0,0110595  | yes |
| AN0213 | ChrVIII_A_nidulans_FGSC_A4:4275712-4277304 | WT_5hasex | WT_veg | OK     | 74,5818  | 114,963  | 0,624271  | -1,29345  | 0,195857   | 0,448604   | no  |
| AN0214 | ChrVIII_A_nidulans_FGSC_A4:4272176-4273606 | WT_5hasex | WT_veg | OK     | 56,818   | 24,9821  | -1,18545  | 2,38777   | 0,0169509  | 0,0786141  | no  |
| AN0215 | ChrVIII_A_nidulans_FGSC_A4:4268628-4270287 | WT_5hasex | WT_veg | NOTEST | 1,42592  | 0,892742 | -0,67558  | 0,460357  | 0,64526    | 1          | no  |
| AN0216 | ChrVIII_A_nidulans_FGSC_A4:4266160-4267356 | WT_5hasex | WT_veg | OK     | 8,26342  | 0,166058 | -5,63698  | 1,89076   | 0,0586562  | 0,198906   | no  |
| AN0217 | ChrVIII_A_nidulans_FGSC_A4:4262393-4264184 | WT_5hasex | WT_veg | NOTEST | 0,194211 | 0,613275 | 1,65891   | -0,729727 | 0,465557   | 1          | no  |
| AN0218 | ChrVIII_A_nidulans_FGSC_A4:4259926-4262078 | WT_5hasex | WT_veg | OK     | 2,17608  | 4,01924  | 0,88519   | -1,1596   | 0,246212   | 0,51397    | no  |
| AN0219 | ChrVIII_A_nidulans_FGSC_A4:4257215-4259362 | WT_5hasex | WT_veg | OK     | 4,17647  | 9,21015  | 1,14094   | -1,71552  | 0,0862493  | 0,261568   | no  |
| AN0220 | ChrVIII_A_nidulans_FGSC_A4:4251360-4251831 | WT_5hasex | WT_veg | NOTEST | 0        | 0        | 0         | 0         | 1          | 1          | no  |
| AN0221 | ChrVIII_A_nidulans_FGSC_A4:4248813-4250156 | WT_5hasex | WT_veg | OK     | 2,31726  | 2,95868  | 0,352532  | -0,394828 | 0,69297    | 0,865448   | no  |
| AN0223 | ChrVIII_A_nidulans_FGSC_A4:4241362-4242702 | WT_5hasex | WT_veg | NOTEST | 0,189249 | 2,13091  | 3,49311   | -1,75551  | 0,0791722  | 1          | no  |
| AN0224 | ChrVIII_A_nidulans_FGSC_A4:4235871-4237346 | WT_5hasex | WT_veg | OK     | 49,0326  | 44,8975  | -0,127106 | 0,260438  | 0,794526   | 0,916493   | no  |
| AN0225 | ChrVIII_A_nidulans_FGSC_A4:4230367-4235423 | WT_5hasex | WT_veg | OK     | 23,1445  | 72,9605  | 1,65645   | -3,45502  | 0,00055026 | 0,0047278  | yes |
| AN0226 | ChrVIII_A_nidulans_FGSC_A4:4228256-4229177 | WT_5hasex | WT_veg | OK     | 89,6508  | 293,139  | 1,7092    | -3,43358  | 0,00059567 | 0,00505657 | yes |
| AN0227 | ChrVIII_A_nidulans_FGSC_A4:4225714-4227422 | WT_5hasex | WT_veg | OK     | 16,1653  | 30,5962  | 0,920452  | -1,6283   | 0,103462   | 0,296723   | no  |
| AN0228 | ChrVIII_A_nidulans_FGSC_A4:4222215-4225138 | WT_5hasex | WT_veg | OK     | 12,8247  | 43,6048  | 1,76556   | -3,47632  | 0,00050834 | 0,00441393 | yes |
| AN0229 | ChrVIII_A_nidulans_FGSC_A4:4218144-4221092 | WT_5hasex | WT_veg | OK     | 157,737  | 310,602  | 0,977545  | -1,86732  | 0,0618572  | 0,20646    | no  |
| AN0230 | ChrVIII_A_nidulans_FGSC_A4:4210291-4211100 | WT_5hasex | WT_veg | OK     | 20,103   | 9,67938  | -1,05442  | 1,36541   | 0,172124   | 0,414334   | no  |
| AN0233 | ChrVIII_A_nidulans_FGSC_A4:4204803-4206708 | WT_5hasex | WT_veg | OK     | 26,3895  | 17,6662  | -0,578971 | 1,11792   | 0,2636     | 0,534566   | no  |
| AN0234 | ChrVIII_A_nidulans_FGSC_A4:4203460-4204306 | WT_5hasex | WT_veg | OK     | 84,2773  | 279,807  | 1,73122   | -3,5131   | 0,00044292 | 0,00392536 | yes |
| AN0235 | ChrVIII_A_nidulans_FGSC_A4:4199252-4202788 | WT_5hasex | WT_veg | OK     | 40,1068  | 98,3653  | 1,2943    | -2,71175  | 0,00669282 | 0,0377928  | yes |
| AN0237 | ChrVIII_A_nidulans_FGSC_A4:4189862-4193486 | WT_5hasex | WT_veg | OK     | 8,78513  | 36,9163  | 2,07112   | -3,95704  | 7,5883E-05 | 0,00086256 | yes |
| AN0239 | ChrVIII_A_nidulans_FGSC_A4:4175713-4183518 | WT_5hasex | WT_veg | OK     | 18,8457  | 20,8571  | 0,146308  | -0,29728  | 0,766253   | 0,903914   | no  |
| AN0242 | ChrVIII_A_nidulans_FGSC_A4:4168137-4171266 | WT_5hasex | WT_veg | OK     | 47,572   | 41,1913  | -0,207775 | 0,429454  | 0,667593   | 0,851194   | no  |
| AN0243 | ChrVIII_A_nidulans_FGSC_A4:4166263-4167787 | WT_5hasex | WT_veg | OK     | 53,7984  | 98,4405  | -1,76969  | -1,76969  | 0,0767917  | 0,240759   | no  |
| AN0245 | ChrVIII_A_nidulans_FGSC_A4:4158184-4159356 | WT_5hasex | WT_veg | OK     | 9,34012  | 26,5471  | 1,50704   | -2,40593  | 0,0161314  | 0,075686   | no  |
| AN0246 | ChrVIII_A_nidulans_FGSC_A4:4153345-4156662 | WT_5hasex | WT_veg | OK     | 19,5436  | 21,224   | 0,118994  | -0,241372 | 0,809267   | 0,923461   | no  |
| AN0247 | ChrVIII_A_nidulans_FGSC_A4:4149129-4152416 | WT_5hasex | WT_veg | OK     | 10,6116  | 78,4419  | 2,88599   | -5,50311  | 3,7315E-08 | 9,5338E-07 | yes |
| AN0249 | ChrVIII_A_nidulans_FGSC_A4:4145528-4147049 | WT_5hasex | WT_veg | OK     | 10,1604  | 13,8137  | 0,443143  | -0,741386 | 0,458459   | 0,718899   | no  |
| AN0250 | ChrVIII_A_nidulans_FGSC_A4:4142435-4144793 | WT_5hasex | WT_veg | OK     | 11,7796  | 14,6868  | 0,318223  | -0,526388 | 0,598619   | 0,812378   | no  |
| AN0251 | ChrVIII_A_nidulans_FGSC_A4:4140077-4142260 | WT_5hasex | WT_veg | NOTEST | 0,635863 | 2,17538  | 1,77448   | -1,99053  | 0,0465323  | 1          | no  |
| AN0252 | ChrVIII_A_nidulans_FGSC_A4:4138282-4139751 | WT_5hasex | WT_veg | OK     | 532,978  | 769,271  | 0,529415  | -0,991133 | 0,321621   | 0,597941   | no  |
| AN0254 | ChrVIII_A_nidulans_FGSC_A4:4132235-4133488 | WT_5hasex | WT_veg | OK     | 53,3289  | 121,343  | 1,1861    | -2,39901  | 0,0164396  | 0,0767662  | no  |
| AN0255 | ChrVIII_A_nidulans_FGSC_A4:4126424-4127782 | WT_5hasex | WT_veg | OK     | 34,3281  | 62,9622  | 0,875095  | -1,71088  | 0,0871026  | 0,263242   | no  |
| AN0258 | ChrVIII_A_nidulans_FGSC_A4:4120071-4121059 | WT_5hasex | WT_veg | OK     | 23,7432  | 26,0225  | 0,132246  | -0,230697 | 0,81755    | 0,926913   | no  |
| AN0259 | ChrVIII_A_nidulans_FGSC_A4:4118495-4119847 | WT_5hasex | WT_veg | OK     | 28,0665  | 19,5902  | -0,518713 | 0,997854  | 0,31835    | 0,594357   | no  |
| AN0260 | ChrVIII_A_nidulans_FGSC_A4:4116621-4118227 | WT_5hasex | WT_veg | OK     | 18,9427  | 29,3891  | 0,633634  | -1,18224  | 0,237111   | 0,502551   | no  |
| AN0262 | ChrVIII_A_nidulans_FGSC_A4:4111635-4112919 | WT_5hasex | WT_veg | OK     | 833,643  | 1282,47  | 0,62142   | -1,0746   | 0,282552   | 0,556418   | no  |
| AN0263 | ChrVIII_A_nidulans_FGSC_A4:4109112-4110496 | WT_5hasex | WT_veg | OK     | 10,896   | 29,0812  | 1,41629   | -2,21211  | 0,0269591  | 0,111677   | no  |
| AN0264 | ChrVIII_A_nidulans_FGSC_A4:4107377-4108249 | WT_5hasex | WT_veg | NOTEST | 1,3208   | 2,65945  | 1,00972   | -0,89044  | 0,37323    | 1          | no  |
| AN0265 | ChrVIII_A_nidulans_FGSC_A4:4101606-4106715 | WT_5hasex | WT_veg | OK     | 26,1505  | 47,9232  | 0,873885  | -1,83664  | 0,0662627  | 0,216842   | no  |
| AN0266 | ChrVIII_A_nidulans_FGSC_A4:4099285-4100921 | WT_5hasex | WT_veg | OK     | 19,5038  | 52,1494  | 1,41889   | -2,72964  | 0,0063404  | 0,0361652  | yes |
| AN0267 | ChrVIII_A_nidulans_FGSC_A4:4098066-4099078 | WT_5hasex | WT_veg | OK     | 54,7145  | 100,404  | 0,875818  | -1,76795  | 0,0770689  | 0,241382   | no  |
| AN0270 | ChrVIII_A_nidulans_FGSC_A4:4090928-4092117 | WT_5hasex | WT_veg | OK     | 24,1551  | 44,8503  | 0,892791  | -1,65253  | 0,098427   | 0,286144   | no  |
| AN0271 | ChrVIII_A_nidulans_FGSC_A4:4089931-4090861 | WT_5hasex | WT_veg | OK     | 104,218  | 146,836  | 0,494594  | -1,00532  | 0,314745   | 0,590966   | no  |
| AN0272 | ChrVIII_A_nidulans_FGSC_A4:4088041-4089555 | WT_5hasex | WT_veg | OK     | 24,5288  | 27,269   | 0,152787  | -0,292384 | 0,769993   | 0,905956   | no  |
| AN0273 | ChrVIII_A_nidulans_FGSC_A4:4081116-4083431 | WT_5hasex | WT_veg | OK     | 211,562  | 312,251  | 0,561625  | -1,07985  | 0,280209   | 0,553781   | no  |



## Supplementary table 1

|        |                                            |           |        |        |          |         |           |           |            |            |     |
|--------|--------------------------------------------|-----------|--------|--------|----------|---------|-----------|-----------|------------|------------|-----|
| AN0274 | ChrVIII_A_nidulans_FGSC_A4:4079999-4080857 | WT_5hasex | WT_veg | OK     | 6,64121  | 7,11634 | 0,0996878 | -0,137071 | 0,890975   | 0,958641   | no  |
| AN0275 | ChrVIII_A_nidulans_FGSC_A4:4076931-4077853 | WT_5hasex | WT_veg | OK     | 131,388  | 89,7264 | -0,550228 | 1,12813   | 0,259263   | 0,529479   | no  |
| AN0276 | ChrVIII_A_nidulans_FGSC_A4:4073722-4076112 | WT_5hasex | WT_veg | OK     | 31,4292  | 35,9727 | 0,194798  | -0,391553 | 0,695389   | 0,866849   | no  |
| AN0278 | ChrVIII_A_nidulans_FGSC_A4:4068808-4069780 | WT_5hasex | WT_veg | OK     | 1380,77  | 2057,31 | 0,575282  | -1,01662  | 0,309333   | 0,585736   | no  |
| AN0280 | ChrVIII_A_nidulans_FGSC_A4:4050341-4052370 | WT_5hasex | WT_veg | OK     | 7,36101  | 5,92262 | -0,313669 | 0,507353  | 0,611907   | 0,819976   | no  |
| AN0282 | ChrVIII_A_nidulans_FGSC_A4:4044394-4045858 | WT_5hasex | WT_veg | OK     | 32,7198  | 94,5121 | 1,53034   | -2,79029  | 0,00526609 | 0,0310025  | yes |
| AN0283 | ChrVIII_A_nidulans_FGSC_A4:4034487-4035662 | WT_5hasex | WT_veg | OK     | 2,18579  | 5,20964 | 1,25303   | -1,23169  | 0,218063   | 0,478572   | no  |
| AN0284 | ChrVIII_A_nidulans_FGSC_A4:4028941-4031225 | WT_5hasex | WT_veg | NOTEST | 0,217647 | 1,35271 | 2,63579   | -1,18427  | 0,236306   | 1          | no  |
| AN0285 | ChrVIII_A_nidulans_FGSC_A4:4025978-4027015 | WT_5hasex | WT_veg | OK     | 286,488  | 1491,17 | 2,37989   | -4,6183   | 3,8691E-06 | 6,1457E-05 | yes |
| AN0286 | ChrVIII_A_nidulans_FGSC_A4:4023243-4025258 | WT_5hasex | WT_veg | OK     | 101,993  | 124,421 | 0,286767  | -0,58672  | 0,557392   | 0,786993   | no  |
| AN0287 | ChrVIII_A_nidulans_FGSC_A4:4018227-4022012 | WT_5hasex | WT_veg | OK     | 100,854  | 150,431 | 0,576832  | -1,13286  | 0,257273   | 0,527121   | no  |
| AN0288 | ChrVIII_A_nidulans_FGSC_A4:4015251-4017084 | WT_5hasex | WT_veg | OK     | 10,4511  | 45,6234 | 2,12612   | -3,73972  | 0,00018422 | 0,00185683 | yes |
| AN0289 | ChrVIII_A_nidulans_FGSC_A4:4013019-4015077 | WT_5hasex | WT_veg | OK     | 24,4281  | 40,8734 | 0,742622  | -1,50136  | 0,133263   | 0,351163   | no  |
| AN0290 | ChrVIII_A_nidulans_FGSC_A4:3998804-3999900 | WT_5hasex | WT_veg | OK     | 149,328  | 205,931 | 0,463676  | -0,962192 | 0,335953   | 0,612079   | no  |
| AN0291 | ChrVIII_A_nidulans_FGSC_A4:3997795-3998447 | WT_5hasex | WT_veg | OK     | 31,385   | 43,5275 | 0,471851  | -0,80052  | 0,42341    | 0,691286   | no  |
| AN0292 | ChrVIII_A_nidulans_FGSC_A4:3994720-3996965 | WT_5hasex | WT_veg | OK     | 32,7973  | 73,8974 | 1,17194   | -2,40029  | 0,0163823  | 0,0765596  | no  |
| AN0293 | ChrVIII_A_nidulans_FGSC_A4:3992907-3994589 | WT_5hasex | WT_veg | OK     | 50,7344  | 117,752 | 1,21472   | -2,40859  | 0,0160144  | 0,0752432  | no  |
| AN0294 | ChrVIII_A_nidulans_FGSC_A4:3991045-3992662 | WT_5hasex | WT_veg | OK     | 244,174  | 601,136 | 1,29978   | -2,30237  | 0,0213142  | 0,0935744  | no  |
| AN0295 | ChrVIII_A_nidulans_FGSC_A4:3988347-3990927 | WT_5hasex | WT_veg | OK     | 44,7549  | 106,848 | 1,25544   | -2,56671  | 0,0102669  | 0,053189   | no  |
| AN0296 | ChrVIII_A_nidulans_FGSC_A4:3987335-3988145 | WT_5hasex | WT_veg | OK     | 31,178   | 42,0492 | 0,431552  | -0,795422 | 0,426368   | 0,693477   | no  |
| AN0297 | ChrVIII_A_nidulans_FGSC_A4:3986097-3987245 | WT_5hasex | WT_veg | OK     | 112,523  | 192,817 | 0,77701   | -1,57187  | 0,11598    | 0,320041   | no  |
| AN0298 | ChrVIII_A_nidulans_FGSC_A4:3984028-3984793 | WT_5hasex | WT_veg | OK     | 21,8333  | 35,258  | 0,691419  | -1,17574  | 0,239698   | 0,505499   | no  |
| AN0299 | ChrVIII_A_nidulans_FGSC_A4:3981050-3982374 | WT_5hasex | WT_veg | OK     | 65,8482  | 169,228 | 1,36175   | -2,80955  | 0,00496112 | 0,0295457  | yes |
| AN0300 | ChrVIII_A_nidulans_FGSC_A4:3979110-3980558 | WT_5hasex | WT_veg | OK     | 53,674   | 131,511 | 1,29288   | -2,12962  | 0,0332029  | 0,131184   | no  |
| AN0301 | ChrVIII_A_nidulans_FGSC_A4:3976965-3978731 | WT_5hasex | WT_veg | OK     | 12,7807  | 45,3334 | 1,8266    | -2,91797  | 0,00352316 | 0,022381   | yes |
| AN0302 | ChrVIII_A_nidulans_FGSC_A4:3972420-3974743 | WT_5hasex | WT_veg | NOTEST | 0,903166 | 3,27349 | 1,85776   | -2,13878  | 0,0324536  | 1          | no  |
| AN0303 | ChrVIII_A_nidulans_FGSC_A4:3969059-3970677 | WT_5hasex | WT_veg | OK     | 55,2882  | 185,664 | 1,74765   | -3,63909  | 0,00027361 | 0,00260683 | yes |
| AN0304 | ChrVIII_A_nidulans_FGSC_A4:3967148-3968368 | WT_5hasex | WT_veg | OK     | 19,9388  | 46,8642 | 1,23291   | -2,2448   | 0,0247808  | 0,104655   | no  |
| AN0305 | ChrVIII_A_nidulans_FGSC_A4:3962931-3966089 | WT_5hasex | WT_veg | OK     | 10,7729  | 82,4003 | 2,93524   | -5,50384  | 3,716E-08  | 9,5034E-07 | yes |
| AN0306 | ChrVIII_A_nidulans_FGSC_A4:3961375-3962747 | WT_5hasex | WT_veg | OK     | 198,514  | 303,824 | 0,613991  | -1,24783  | 0,212093   | 0,470948   | no  |
| AN0307 | ChrVIII_A_nidulans_FGSC_A4:3958028-3959240 | WT_5hasex | WT_veg | OK     | 2,40813  | 5,02355 | 1,0608    | -1,32401  | 0,185501   | 0,434353   | no  |
| AN0309 | ChrVIII_A_nidulans_FGSC_A4:3951723-3952110 | WT_5hasex | WT_veg | OK     | 166,813  | 272,983 | 0,710579  | -1,35182  | 0,176432   | 0,421048   | no  |
| AN0310 | ChrVIII_A_nidulans_FGSC_A4:3949555-3951547 | WT_5hasex | WT_veg | OK     | 22,1435  | 123,315 | 2,4774    | -4,65667  | 3,2136E-06 | 5,2314E-05 | yes |
| AN0311 | ChrVIII_A_nidulans_FGSC_A4:3946543-3947810 | WT_5hasex | WT_veg | OK     | 100,733  | 258,347 | 1,35877   | -2,77679  | 0,00548979 | 0,0320709  | yes |
| AN0312 | ChrVIII_A_nidulans_FGSC_A4:3943598-3945737 | WT_5hasex | WT_veg | OK     | 5,51483  | 27,6181 | 2,32422   | -3,8186   | 0,00013421 | 0,00141851 | yes |
| AN0313 | ChrVIII_A_nidulans_FGSC_A4:3942168-3943182 | WT_5hasex | WT_veg | OK     | 78,7692  | 313,648 | 1,99344   | -4,15311  | 3,2798E-05 | 0,00041504 | yes |
| AN0314 | ChrVIII_A_nidulans_FGSC_A4:3938171-3941353 | WT_5hasex | WT_veg | OK     | 338,739  | 2309,73 | 2,76948   | -3,92574  | 8,6463E-05 | 0,00096689 | yes |
| AN0315 | ChrVIII_A_nidulans_FGSC_A4:3936913-3938135 | WT_5hasex | WT_veg | OK     | 45,0121  | 50,2267 | 0,15814   | -0,30698  | 0,758858   | 0,900238   | no  |
| AN0317 | ChrVIII_A_nidulans_FGSC_A4:3929625-3933837 | WT_5hasex | WT_veg | OK     | 25,6329  | 41,8197 | 0,706186  | -1,47459  | 0,140322   | 0,362993   | no  |
| AN0318 | ChrVIII_A_nidulans_FGSC_A4:3926016-3929102 | WT_5hasex | WT_veg | OK     | 8,72619  | 18,782  | 1,10592   | -2,00773  | 0,0446724  | 0,163701   | no  |
| AN0319 | ChrVIII_A_nidulans_FGSC_A4:3923088-3925485 | WT_5hasex | WT_veg | OK     | 11,4261  | 45,9541 | 2,00786   | -3,47712  | 0,00050683 | 0,00440298 | yes |
| AN0321 | ChrVIII_A_nidulans_FGSC_A4:3901628-3905409 | WT_5hasex | WT_veg | OK     | 11,981   | 35,6847 | 1,57455   | -3,14798  | 0,00164403 | 0,0118616  | yes |
| AN0322 | ChrVIII_A_nidulans_FGSC_A4:3900288-3901365 | WT_5hasex | WT_veg | OK     | 0,804264 | 4,12273 | 2,35786   | -2,39082  | 0,0168108  | 0,0781098  | no  |
| AN0323 | ChrVIII_A_nidulans_FGSC_A4:3898899-3899960 | WT_5hasex | WT_veg | OK     | 60,6808  | 203,796 | 1,74781   | -3,46748  | 0,00052536 | 0,00453986 | yes |
| AN0324 | ChrVIII_A_nidulans_FGSC_A4:3894517-3896279 | WT_5hasex | WT_veg | OK     | 24,5482  | 35,2726 | 0,522932  | -1,01891  | 0,308247   | 0,584357   | no  |
| AN0325 | ChrVIII_A_nidulans_FGSC_A4:3890088-3894012 | WT_5hasex | WT_veg | OK     | 23,6234  | 69,0918 | 1,5483    | -2,92514  | 0,00344301 | 0,021957   | yes |
| AN0326 | ChrVIII_A_nidulans_FGSC_A4:3890088-3894012 | WT_5hasex | WT_veg | OK     | 14,0714  | 42,485  | 1,59419   | -2,97387  | 0,00294068 | 0,0192285  | yes |
| AN0327 | ChrVIII_A_nidulans_FGSC_A4:3888096-3889918 | WT_5hasex | WT_veg | OK     | 85,9314  | 117,017 | 0,445465  | -0,917019 | 0,359132   | 0,633962   | no  |
| AN0328 | ChrVIII_A_nidulans_FGSC_A4:3886727-3888074 | WT_5hasex | WT_veg | OK     | 43,7188  | 117,308 | 1,42397   | -2,91703  | 0,00353384 | 0,0224352  | yes |
| AN0329 | ChrVIII_A_nidulans_FGSC_A4:3883942-3886265 | WT_5hasex | WT_veg | OK     | 57,3882  | 166,439 | 1,53617   | -3,1504   | 0,00163048 | 0,0117784  | yes |
| AN0330 | ChrVIII_A_nidulans_FGSC_A4:3882099-3883407 | WT_5hasex | WT_veg | OK     | 48,9924  | 152,751 | 1,64055   | -3,19563  | 0,00139525 | 0,0103356  | yes |
| AN0331 | ChrVIII_A_nidulans_FGSC_A4:3880971-3881593 | WT_5hasex | WT_veg | OK     | 12,5295  | 32,0257 | 1,35391   | -1,93608  | 0,0528575  | 0,184471   | no  |
| AN0332 | ChrVIII_A_nidulans_FGSC_A4:3878338-3880126 | WT_5hasex | WT_veg | OK     | 34,2384  | 50,2961 | 0,554834  | -1,07497  | 0,282389   | 0,556214   | no  |

## Supplementary table 1

|        |                                            |           |        |        |          |          |               |               |            |            |      |
|--------|--------------------------------------------|-----------|--------|--------|----------|----------|---------------|---------------|------------|------------|------|
| AN0333 | ChrVIII_A_nidulans_FGSC_A4:3874322-3876980 | WT_5hasex | WT_veg | OK     | 9,48468  | 16,5388  | 0,80218       | -1,44871      | 0,147419   | 0,374965   | no   |
| AN0334 | ChrVIII_A_nidulans_FGSC_A4:3872115-3874109 | WT_5hasex | WT_veg | OK     | 63,4472  | 161,794  | 1,35053       | -2,78713      | 0,00531774 | 0,0312539  | yes  |
| AN0335 | ChrVIII_A_nidulans_FGSC_A4:3870232-3871603 | WT_5hasex | WT_veg | OK     | 24,5362  | 18,9052  | -0,376132     | 0,68268       | 0,494809   | 0,745983   | no   |
| AN0336 | ChrVIII_A_nidulans_FGSC_A4:3867526-3868503 | WT_5hasex | WT_veg | NOTEST | 0,833539 | 0,424787 | -0,972511     | 0,536958      | 0,591296   |            | 1 no |
| AN0337 | ChrVIII_A_nidulans_FGSC_A4:3865628-3866981 | WT_5hasex | WT_veg | OK     | 21,06    | 284,7    | 3,75687       | -7,00248      | 2,5147E-12 | 1,3191E-10 | yes  |
| AN0339 | ChrVIII_A_nidulans_FGSC_A4:3857303-3860243 | WT_5hasex | WT_veg | OK     | 28,2417  | 15,1523  | -0,898285     | 1,83351       | 0,0667266  | 0,217891   | no   |
| AN0340 | ChrVIII_A_nidulans_FGSC_A4:3854118-3856821 | WT_5hasex | WT_veg | OK     | 20,4264  | 21,6026  | 0,0807678     | -0,16257      | 0,870857   | 0,95057    | no   |
| AN0341 | ChrVIII_A_nidulans_FGSC_A4:3852963-3853646 | WT_5hasex | WT_veg | NOTEST | 0,832229 | 1,87843  | 1,17448       | -0,678737     | 0,497304   |            | 1 no |
| AN0342 | ChrVIII_A_nidulans_FGSC_A4:3851576-3852394 | WT_5hasex | WT_veg | NOTEST | 0        | 0        | 0             | 0             | 1          |            | 1 no |
| AN0343 | ChrVIII_A_nidulans_FGSC_A4:3850112-3850952 | WT_5hasex | WT_veg | NOTEST | 0,22951  | 0        | -1.79769e+308 | -1.79769e+308 | 0,165569   |            | 1 no |
| AN0346 | ChrVIII_A_nidulans_FGSC_A4:3839847-3841103 | WT_5hasex | WT_veg | OK     | 28,2992  | 131,193  | 2,21286       | -4,13952      | 3,4803E-05 | 0,00043672 | yes  |
| AN0348 | ChrVIII_A_nidulans_FGSC_A4:3833953-3837395 | WT_5hasex | WT_veg | OK     | 7,11561  | 13,1563  | 0,886698      | -1,5989       | 0,109843   | 0,308946   | no   |
| AN0349 | ChrVIII_A_nidulans_FGSC_A4:3831475-3833433 | WT_5hasex | WT_veg | OK     | 40,8958  | 38,5119  | -0,0866468    | 0,178218      | 0,858552   | 0,944992   | no   |
| AN0350 | ChrVIII_A_nidulans_FGSC_A4:3830039-3830753 | WT_5hasex | WT_veg | OK     | 39,824   | 100,635  | 1,33742       | -2,37889      | 0,0173647  | 0,079982   | no   |
| AN0353 | ChrVIII_A_nidulans_FGSC_A4:3815815-3818095 | WT_5hasex | WT_veg | OK     | 19,7507  | 81,7995  | 2,05019       | -4,08313      | 4,4432E-05 | 0,00054087 | yes  |
| AN0355 | ChrVIII_A_nidulans_FGSC_A4:3810553-3813391 | WT_5hasex | WT_veg | OK     | 7,07935  | 12,5186  | 0,822386      | -1,48111      | 0,138576   | 0,360059   | no   |
| AN0356 | ChrVIII_A_nidulans_FGSC_A4:3807159-3808419 | WT_5hasex | WT_veg | OK     | 71,5094  | 180,617  | 1,33673       | -2,58301      | 0,00979412 | 0,0512207  | no   |
| AN0357 | ChrVIII_A_nidulans_FGSC_A4:3805416-3807049 | WT_5hasex | WT_veg | OK     | 278,563  | 488,023  | 0,808946      | -1,58077      | 0,11393    | 0,316489   | no   |
| AN0360 | ChrVIII_A_nidulans_FGSC_A4:3795000-3796502 | WT_5hasex | WT_veg | OK     | 34,7016  | 85,003   | 1,29251       | -2,47626      | 0,0132768  | 0,0651433  | no   |
| AN0362 | ChrVIII_A_nidulans_FGSC_A4:3788642-3789573 | WT_5hasex | WT_veg | OK     | 256,934  | 96,1956  | -1,41736      | 2,4986        | 0,0124686  | 0,0620141  | no   |
| AN0364 | ChrVIII_A_nidulans_FGSC_A4:3780403-3781745 | WT_5hasex | WT_veg | OK     | 36,9213  | 13,8433  | -1,41527      | 2,41268       | 0,0158358  | 0,0745987  | no   |
| AN0365 | ChrVIII_A_nidulans_FGSC_A4:3778577-3779137 | WT_5hasex | WT_veg | OK     | 310,996  | 219,898  | -0,500059     | 0,972367      | 0,330868   | 0,607221   | no   |
| AN0366 | ChrVIII_A_nidulans_FGSC_A4:3775681-3776546 | WT_5hasex | WT_veg | OK     | 17,9226  | 0        | -1.79769e+308 | -1.79769e+308 | 0,00594016 | 0,0342062  | yes  |
| AN0367 | ChrVIII_A_nidulans_FGSC_A4:3773432-3774784 | WT_5hasex | WT_veg | OK     | 26,986   | 35,2435  | 0,385145      | -0,744192     | 0,45676    | 0,717717   | no   |
| AN0368 | ChrVIII_A_nidulans_FGSC_A4:3767422-3770984 | WT_5hasex | WT_veg | NOTEST | 0,936836 | 2,31783  | 1,30691       | -1,71104      | 0,0870742  |            | 1 no |
| AN0369 | ChrVIII_A_nidulans_FGSC_A4:3765217-3767021 | WT_5hasex | WT_veg | OK     | 436,38   | 1171,23  | 1,42437       | -2,45445      | 0,01411    | 0,068216   | no   |
| AN0370 | ChrVIII_A_nidulans_FGSC_A4:3763775-3764921 | WT_5hasex | WT_veg | OK     | 2,87486  | 6,48827  | 1,17434       | -1,48508      | 0,137523   | 0,358388   | no   |
| AN0372 | ChrVIII_A_nidulans_FGSC_A4:3758699-3759913 | WT_5hasex | WT_veg | OK     | 21,3451  | 21,9457  | 0,0400297     | -0,0678497    | 0,945905   | 0,979746   | no   |
| AN0374 | ChrVIII_A_nidulans_FGSC_A4:3751063-3752916 | WT_5hasex | WT_veg | NOTEST | 1,64105  | 0,451568 | -1,86161      | 1,30735       | 0,191094   |            | 1 no |
| AN0376 | ChrVIII_A_nidulans_FGSC_A4:3737907-3743430 | WT_5hasex | WT_veg | OK     | 4,40546  | 6,25173  | 0,504963      | -0,900396     | 0,367909   | 0,642725   | no   |
| AN0377 | ChrVIII_A_nidulans_FGSC_A4:3733772-3734869 | WT_5hasex | WT_veg | OK     | 11,0112  | 11,195   | 0,0238754     | -0,0376923    | 0,969933   | 0,989084   | no   |
| AN0378 | ChrVIII_A_nidulans_FGSC_A4:3732562-3733446 | WT_5hasex | WT_veg | OK     | 7,53331  | 11,5089  | 0,6114        | -0,876191     | 0,380926   | 0,655242   | no   |
| AN0379 | ChrVIII_A_nidulans_FGSC_A4:3730329-3731755 | WT_5hasex | WT_veg | OK     | 162,492  | 357,196  | 1,13634       | -2,31524      | 0,0205999  | 0,0912105  | no   |
| AN0381 | ChrVIII_A_nidulans_FGSC_A4:3726146-3728045 | WT_5hasex | WT_veg | OK     | 100,48   | 169,468  | 0,754109      | -1,51778      | 0,12907    | 0,343693   | no   |
| AN0382 | ChrVIII_A_nidulans_FGSC_A4:3724418-3726013 | WT_5hasex | WT_veg | OK     | 6,08035  | 6,47164  | 0,0899766     | -0,129461     | 0,896993   | 0,960695   | no   |
| AN0384 | ChrVIII_A_nidulans_FGSC_A4:3717971-3721251 | WT_5hasex | WT_veg | OK     | 6,9459   | 9,31981  | 0,424138      | -0,773395     | 0,439289   | 0,703648   | no   |
| AN0385 | ChrVIII_A_nidulans_FGSC_A4:3716484-3717797 | WT_5hasex | WT_veg | OK     | 22,2123  | 33,1614  | 0,578146      | -1,06307      | 0,287749   | 0,562111   | no   |
| AN0386 | ChrVIII_A_nidulans_FGSC_A4:3714919-3715837 | WT_5hasex | WT_veg | OK     | 19,236   | 38,6663  | 1,00727       | -1,61628      | 0,106034   | 0,301885   | no   |
| AN0388 | ChrVIII_A_nidulans_FGSC_A4:3709320-3711834 | WT_5hasex | WT_veg | OK     | 4,11987  | 7,40744  | 0,846376      | -1,31225      | 0,189436   | 0,43994    | no   |
| AN0389 | ChrVIII_A_nidulans_FGSC_A4:3707235-3708162 | WT_5hasex | WT_veg | OK     | 2,74303  | 4,91728  | 0,842088      | -1,00234      | 0,31618    | 0,592281   | no   |
| AN0390 | ChrVIII_A_nidulans_FGSC_A4:3705221-3706244 | WT_5hasex | WT_veg | OK     | 1,9711   | 2,61493  | 0,407773      | -0,418232     | 0,675778   | 0,855809   | no   |
| AN0391 | ChrVIII_A_nidulans_FGSC_A4:3698352-3704591 | WT_5hasex | WT_veg | NOTEST | 0,763683 | 0,704986 | -0,115378     | 0,144624      | 0,885008   |            | 1 no |
| AN0392 | ChrVIII_A_nidulans_FGSC_A4:3696551-3698097 | WT_5hasex | WT_veg | OK     | 6,26884  | 12,5552  | 1,00202       | -1,35237      | 0,176258   | 0,420789   | no   |
| AN0394 | ChrVIII_A_nidulans_FGSC_A4:3690400-3691809 | WT_5hasex | WT_veg | OK     | 12,1887  | 3,36145  | -1,85839      | 2,52401       | 0,0116023  | 0,0585895  | no   |
| AN0395 | ChrVIII_A_nidulans_FGSC_A4:3688716-3689870 | WT_5hasex | WT_veg | OK     | 2,6373   | 9,9739   | 1,9191        | -2,42992      | 0,0151022  | 0,0719113  | no   |
| AN0396 | ChrVIII_A_nidulans_FGSC_A4:3686488-3687592 | WT_5hasex | WT_veg | OK     | 17,265   | 25,679   | 0,572735      | -0,965522     | 0,334283   | 0,610665   | no   |
| AN0397 | ChrVIII_A_nidulans_FGSC_A4:3685311-3685745 | WT_5hasex | WT_veg | OK     | 10,1458  | 14,8967  | 0,554103      | -0,636147     | 0,524681   | 0,766224   | no   |
| AN0398 | ChrVIII_A_nidulans_FGSC_A4:3681646-3683616 | WT_5hasex | WT_veg | OK     | 30,7807  | 14,9397  | -1,04287      | 1,85433       | 0,0636917  | 0,210732   | no   |
| AN0400 | ChrVIII_A_nidulans_FGSC_A4:3676255-3676777 | WT_5hasex | WT_veg | OK     | 135,747  | 1117,16  | 3,04084       | -5,97052      | 2,365E-09  | 7,7214E-08 | yes  |
| AN0401 | ChrVIII_A_nidulans_FGSC_A4:3674312-3675774 | WT_5hasex | WT_veg | OK     | 81,5203  | 180,867  | 1,1497        | -2,31586      | 0,0205657  | 0,09109    | no   |
| AN0402 | ChrVIII_A_nidulans_FGSC_A4:3673028-3674157 | WT_5hasex | WT_veg | OK     | 48,5636  | 63,0863  | 0,377452      | -0,734779     | 0,462474   | 0,721911   | no   |
| AN0403 | ChrVIII_A_nidulans_FGSC_A4:3669246-3670798 | WT_5hasex | WT_veg | OK     | 14,2118  | 1,49696  | -3,24698      | 3,61827       | 0,00029658 | 0,00279474 | yes  |
| AN0404 | ChrVIII_A_nidulans_FGSC_A4:3664225-3668404 | WT_5hasex | WT_veg | OK     | 5,23815  | 2,11721  | -1,3069       | 2,17397       | 0,0297071  | 0,120461   | no   |

## Supplementary table 1

|        |                                            |           |        |    |         |         |           |           |            |            |     |
|--------|--------------------------------------------|-----------|--------|----|---------|---------|-----------|-----------|------------|------------|-----|
| AN0405 | ChrVIII_A_nidulans_FGSC_A4:3663585-3664074 | WT_5hasex | WT_veg | OK | 92,2441 | 180,67  | 0,969827  | -1,86451  | 0,0622506  | 0,207365   | no  |
| AN0406 | ChrVIII_A_nidulans_FGSC_A4:3661136-3663393 | WT_5hasex | WT_veg | OK | 60,9767 | 199,746 | 1,71184   | -3,56915  | 0,00035814 | 0,00327301 | yes |
| AN0407 | ChrVIII_A_nidulans_FGSC_A4:3656581-3660029 | WT_5hasex | WT_veg | OK | 5,34595 | 10,0415 | 0,90946   | -1,59391  | 0,110956   | 0,21108    | no  |
| AN0408 | ChrVIII_A_nidulans_FGSC_A4:3653475-3655775 | WT_5hasex | WT_veg | OK | 96,3773 | 201,259 | 1,06229   | -2,12132  | 0,0338951  | 0,133384   | no  |
| AN0409 | ChrVIII_A_nidulans_FGSC_A4:3645283-3647971 | WT_5hasex | WT_veg | OK | 66,3141 | 92,5013 | 0,480158  | -0,877934 | 0,37998    | 0,654452   | no  |
| AN0411 | ChrVIII_A_nidulans_FGSC_A4:3637839-3638988 | WT_5hasex | WT_veg | OK | 308,152 | 555,868 | 0,851098  | -1,75742  | 0,0788469  | 0,245299   | no  |
| AN0412 | ChrVIII_A_nidulans_FGSC_A4:3634663-3637647 | WT_5hasex | WT_veg | OK | 46,7685 | 170,867 | 1,86926   | -3,80333  | 0,00014277 | 0,00149091 | yes |
| AN0413 | ChrVIII_A_nidulans_FGSC_A4:3629712-3631126 | WT_5hasex | WT_veg | OK | 2,80992 | 7,13972 | 1,34534   | -1,60159  | 0,109246   | 0,30793    | no  |
| AN0414 | ChrVIII_A_nidulans_FGSC_A4:3622379-3625377 | WT_5hasex | WT_veg | OK | 11,2213 | 23,2731 | 1,05243   | -1,99516  | 0,0460255  | 0,167407   | no  |
| AN0416 | ChrVIII_A_nidulans_FGSC_A4:3612839-3614005 | WT_5hasex | WT_veg | OK | 61,3943 | 147,272 | 1,26231   | -2,55201  | 0,0107102  | 0,0549958  | no  |
| AN0419 | ChrVIII_A_nidulans_FGSC_A4:3606055-3607057 | WT_5hasex | WT_veg | OK | 27,7931 | 92,0331 | 1,72743   | -2,84677  | 0,00441659 | 0,0269427  | yes |
| AN0421 | ChrVIII_A_nidulans_FGSC_A4:3601504-3604618 | WT_5hasex | WT_veg | OK | 15,853  | 193,232 | 3,60751   | -7,06297  | 1,6298E-12 | 8,8047E-11 | yes |
| AN0423 | ChrVIII_A_nidulans_FGSC_A4:3596590-3597747 | WT_5hasex | WT_veg | OK | 18,1728 | 47,9269 | 1,39905   | -2,45833  | 0,0139585  | 0,0676522  | no  |
| AN0424 | ChrVIII_A_nidulans_FGSC_A4:3595393-3596387 | WT_5hasex | WT_veg | OK | 16,9637 | 35,5208 | 1,06622   | -1,79374  | 0,072855   | 0,231829   | no  |
| AN0427 | ChrVIII_A_nidulans_FGSC_A4:3581983-3583208 | WT_5hasex | WT_veg | OK | 55,8119 | 431,18  | 2,94965   | -5,95478  | 2,6042E-09 | 8,4342E-08 | yes |
| AN0428 | ChrVIII_A_nidulans_FGSC_A4:3579776-3581725 | WT_5hasex | WT_veg | OK | 34,9546 | 76,6469 | 1,13274   | -2,31767  | 0,0204675  | 0,0907547  | no  |
| AN0429 | ChrVIII_A_nidulans_FGSC_A4:3578611-3579310 | WT_5hasex | WT_veg | OK | 192,035 | 212,569 | 0,14656   | -0,30184  | 0,762774   | 0,902114   | no  |
| AN0430 | ChrVIII_A_nidulans_FGSC_A4:3575731-3578524 | WT_5hasex | WT_veg | OK | 44,5768 | 142,793 | 1,67956   | -3,42378  | 0,00061757 | 0,00521548 | yes |
| AN0432 | ChrVIII_A_nidulans_FGSC_A4:3566598-3567965 | WT_5hasex | WT_veg | OK | 143,123 | 498,97  | 1,8017    | -3,70876  | 0,00020828 | 0,00206471 | yes |
| AN0433 | ChrVIII_A_nidulans_FGSC_A4:3564024-3565345 | WT_5hasex | WT_veg | OK | 660,593 | 1010,98 | 0,613926  | -1,08798  | 0,276603   | 0,549788   | no  |
| AN0434 | ChrVIII_A_nidulans_FGSC_A4:3561746-3563780 | WT_5hasex | WT_veg | OK | 40,8374 | 81,9622 | 1,00507   | -2,05863  | 0,03953    | 0,149558   | no  |
| AN0435 | ChrVIII_A_nidulans_FGSC_A4:3560344-3561389 | WT_5hasex | WT_veg | OK | 8,41657 | 36,5205 | 2,1174    | -3,15166  | 0,00162346 | 0,011739   | yes |
| AN0436 | ChrVIII_A_nidulans_FGSC_A4:3557880-3559586 | WT_5hasex | WT_veg | OK | 159,379 | 166,483 | 0,0629146 | -0,127479 | 0,898561   | 0,961087   | no  |
| AN0437 | ChrVIII_A_nidulans_FGSC_A4:3553029-3556558 | WT_5hasex | WT_veg | OK | 5,93455 | 14,0895 | 1,24741   | -1,97605  | 0,0481489  | 0,17302    | no  |
| AN0438 | ChrVIII_A_nidulans_FGSC_A4:3551054-3552135 | WT_5hasex | WT_veg | OK | 29,6031 | 56,6643 | 0,936694  | -1,67121  | 0,0946805  | 0,27867    | no  |
| AN0439 | ChrVIII_A_nidulans_FGSC_A4:3548523-3550387 | WT_5hasex | WT_veg | OK | 18,5841 | 27,5757 | 0,569328  | -1,08425  | 0,278256   | 0,551544   | no  |
| AN0440 | ChrVIII_A_nidulans_FGSC_A4:3545961-3548459 | WT_5hasex | WT_veg | OK | 27,8301 | 49,9921 | 0,845054  | -1,7065   | 0,0879148  | 0,26478    | no  |
| AN0441 | ChrVIII_A_nidulans_FGSC_A4:3543448-3545064 | WT_5hasex | WT_veg | OK | 8,60152 | 42,2174 | 2,29517   | -3,71477  | 0,00020339 | 0,00202355 | yes |
| AN0442 | ChrVIII_A_nidulans_FGSC_A4:3542277-3543297 | WT_5hasex | WT_veg | OK | 43,1352 | 61,2051 | 0,504785  | -0,965863 | 0,334113   | 0,610575   | no  |
| AN0443 | ChrVIII_A_nidulans_FGSC_A4:3540038-3542056 | WT_5hasex | WT_veg | OK | 200,538 | 617,507 | 1,62258   | -3,20168  | 0,00136629 | 0,010157   | yes |
| AN0445 | ChrVIII_A_nidulans_FGSC_A4:3532371-3533788 | WT_5hasex | WT_veg | OK | 1075,75 | 2080,39 | 0,951511  | -1,62673  | 0,103795   | 0,297395   | no  |
| AN0446 | ChrVIII_A_nidulans_FGSC_A4:3529054-3531707 | WT_5hasex | WT_veg | OK | 36,9459 | 45,0463 | 0,285994  | -0,597456 | 0,550203   | 0,782225   | no  |
| AN0447 | ChrVIII_A_nidulans_FGSC_A4:3523007-3524202 | WT_5hasex | WT_veg | OK | 202,295 | 1039,2  | 2,36093   | -4,73832  | 2,155E-06  | 3,6759E-05 | yes |
| AN0448 | ChrVIII_A_nidulans_FGSC_A4:3520630-3521288 | WT_5hasex | WT_veg | OK | 33,6991 | 53,4514 | 0,66552   | -1,18874  | 0,234543   | 0,499751   | no  |
| AN0449 | ChrVIII_A_nidulans_FGSC_A4:3514685-3518966 | WT_5hasex | WT_veg | OK | 29,5598 | 56,5246 | 0,935244  | -1,94521  | 0,0517491  | 0,181839   | no  |
| AN0450 | ChrVIII_A_nidulans_FGSC_A4:3513047-3514316 | WT_5hasex | WT_veg | OK | 13,7024 | 21,3253 | 0,63814   | -1,10751  | 0,268072   | 0,539894   | no  |
| AN0451 | ChrVIII_A_nidulans_FGSC_A4:3511889-3512906 | WT_5hasex | WT_veg | OK | 96,7447 | 215,808 | 1,1575    | -2,39109  | 0,0167983  | 0,0780721  | no  |
| AN0452 | ChrVIII_A_nidulans_FGSC_A4:3509529-3510304 | WT_5hasex | WT_veg | OK | 12,9453 | 21,6142 | 0,739557  | -1,12863  | 0,259052   | 0,529193   | no  |
| AN0454 | ChrVIII_A_nidulans_FGSC_A4:3503738-3505709 | WT_5hasex | WT_veg | OK | 73,1788 | 248,128 | 1,76159   | -3,67119  | 0,00024143 | 0,00234239 | yes |
| AN0456 | ChrVIII_A_nidulans_FGSC_A4:3497349-3498177 | WT_5hasex | WT_veg | OK | 7,60427 | 8,857   | 0,220008  | -0,307709 | 0,758304   | 0,900113   | no  |
| AN0457 | ChrVIII_A_nidulans_FGSC_A4:3495941-3496720 | WT_5hasex | WT_veg | OK | 76,1394 | 41,8243 | -0,864303 | 1,67582   | 0,0937731  | 0,27678    | no  |
| AN0458 | ChrVIII_A_nidulans_FGSC_A4:3494086-3495737 | WT_5hasex | WT_veg | OK | 30,5377 | 49,0753 | 0,684405  | -1,3444   | 0,17882    | 0,424389   | no  |
| AN0460 | ChrVIII_A_nidulans_FGSC_A4:3488543-3490390 | WT_5hasex | WT_veg | OK | 10,8009 | 13,9025 | 0,3642    | -0,632902 | 0,526797   | 0,767523   | no  |
| AN0461 | ChrVIII_A_nidulans_FGSC_A4:3486754-3488163 | WT_5hasex | WT_veg | OK | 20,0058 | 183,773 | 3,19944   | -5,85192  | 4,8592E-09 | 1,4987E-07 | yes |
| AN0463 | ChrVIII_A_nidulans_FGSC_A4:3473688-3480087 | WT_5hasex | WT_veg | OK | 9,31472 | 27,4318 | 1,55826   | -3,08185  | 0,00205718 | 0,0143018  | yes |
| AN0464 | ChrVIII_A_nidulans_FGSC_A4:3472007-3473274 | WT_5hasex | WT_veg | OK | 9,39615 | 13,9561 | 0,570752  | -0,844036 | 0,398649   | 0,671136   | no  |
| AN0465 | ChrVIII_A_nidulans_FGSC_A4:3470493-3471830 | WT_5hasex | WT_veg | OK | 535,53  | 875,816 | 0,709661  | -1,29071  | 0,196806   | 0,450055   | no  |
| AN0466 | ChrVIII_A_nidulans_FGSC_A4:3468950-3469619 | WT_5hasex | WT_veg | OK | 30,3508 | 67,5798 | 1,15486   | -2,02337  | 0,0430349  | 0,159136   | no  |
| AN0467 | ChrVIII_A_nidulans_FGSC_A4:3467586-3468676 | WT_5hasex | WT_veg | OK | 625,405 | 4190,98 | 2,74443   | -4,89406  | 9,8775E-07 | 1,8098E-05 | yes |
| AN0468 | ChrVIII_A_nidulans_FGSC_A4:3465653-3467230 | WT_5hasex | WT_veg | OK | 922,867 | 4892,55 | 2,40639   | -3,40961  | 0,00065057 | 0,00544497 | yes |
| AN0469 | ChrVIII_A_nidulans_FGSC_A4:3461261-3465600 | WT_5hasex | WT_veg | OK | 20,1119 | 27,5365 | 0,453294  | -0,919464 | 0,357853   | 0,632986   | no  |
| AN0470 | ChrVIII_A_nidulans_FGSC_A4:3456305-3457893 | WT_5hasex | WT_veg | OK | 118,979 | 201,06  | 0,756926  | -1,51128  | 0,130717   | 0,346482   | no  |
| AN0473 | ChrVIII_A_nidulans_FGSC_A4:3445689-3447432 | WT_5hasex | WT_veg | OK | 18,6874 | 14,095  | -0,406883 | 0,738074  | 0,46047    | 0,720478   | no  |

## Supplementary table 1

|        |                                            |           |        |        |           |           |               |               |            |            |     |
|--------|--------------------------------------------|-----------|--------|--------|-----------|-----------|---------------|---------------|------------|------------|-----|
| AN0474 | ChrVIII_A_nidulans_FGSC_A4:3444129-3445137 | WT_5hasex | WT_veg | OK     | 421,976   | 561,298   | 0,411604      | -0,591791     | 0,55399    | 0,784494   | no  |
| AN0475 | ChrVIII_A_nidulans_FGSC_A4:3440720-3443741 | WT_5hasex | WT_veg | OK     | 13,2093   | 98,3796   | 2,8968        | -5,74547      | 9,1664E-09 | 2,676E-07  | yes |
| AN0476 | ChrVIII_A_nidulans_FGSC_A4:3439620-3440482 | WT_5hasex | WT_veg | OK     | 110,476   | 276,703   | 1,32461       | -2,6735       | 0,00750636 | 0,0414269  | yes |
| AN0477 | ChrVIII_A_nidulans_FGSC_A4:3437534-3439074 | WT_5hasex | WT_veg | NOTEST | 1,06619   | 0,738088  | -0,530594     | 0,424822      | 0,670967   | 1          | no  |
| AN0478 | ChrVIII_A_nidulans_FGSC_A4:3433857-3434617 | WT_5hasex | WT_veg | NOTEST | 0         | 0         | 0             | 0             | 1          | 1          | no  |
| AN0480 | ChrVIII_A_nidulans_FGSC_A4:3428061-3429750 | WT_5hasex | WT_veg | OK     | 32,2016   | 85,8559   | 1,41478       | -2,65096      | 0,00802645 | 0,0437216  | yes |
| AN0481 | ChrVIII_A_nidulans_FGSC_A4:3422774-3426907 | WT_5hasex | WT_veg | OK     | 5,38253   | 18,1022   | 1,74981       | -2,951        | 0,0031675  | 0,0204514  | yes |
| AN0482 | ChrVIII_A_nidulans_FGSC_A4:3418485-3421943 | WT_5hasex | WT_veg | OK     | 8,4762    | 34,8416   | 2,03932       | -3,86966      | 0,00010899 | 0,00118364 | yes |
| AN0483 | ChrVIII_A_nidulans_FGSC_A4:3415870-3416429 | WT_5hasex | WT_veg | OK     | 41,3352   | 19,5698   | -1,07874      | 1,6779        | 0,093366   | 0,275933   | no  |
| AN0484 | ChrVIII_A_nidulans_FGSC_A4:3414280-3415709 | WT_5hasex | WT_veg | OK     | 11,5869   | 20,1542   | 0,798592      | -1,30779      | 0,190943   | 0,441835   | no  |
| AN0485 | ChrVIII_A_nidulans_FGSC_A4:3411836-3413400 | WT_5hasex | WT_veg | OK     | 11,3244   | 15,4043   | 0,443893      | -0,716081     | 0,473941   | 0,730827   | no  |
| AN0486 | ChrVIII_A_nidulans_FGSC_A4:3408102-3410922 | WT_5hasex | WT_veg | OK     | 8,65807   | 14,0438   | 0,697817      | -1,2185       | 0,223033   | 0,484963   | no  |
| AN0487 | ChrVIII_A_nidulans_FGSC_A4:3404650-3407491 | WT_5hasex | WT_veg | OK     | 4,92447   | 8,92015   | 0,8571        | -1,41261      | 0,15777    | 0,391974   | no  |
| AN0489 | ChrVIII_A_nidulans_FGSC_A4:3396732-3398344 | WT_5hasex | WT_veg | NOTEST | 0         | 0         | 0             | 0             | 1          | 1          | no  |
| AN0490 | ChrVIII_A_nidulans_FGSC_A4:3392764-3395028 | WT_5hasex | WT_veg | OK     | 101,776   | 282,243   | 1,47154       | -2,83808      | 0,00453865 | 0,0275335  | yes |
| AN0492 | ChrVIII_A_nidulans_FGSC_A4:3386698-3387274 | WT_5hasex | WT_veg | NOTEST | 1,35952   | 0         | -1.79769e+308 | -1.79769e+308 | 0,0654719  | 1          | no  |
| AN0493 | ChrVIII_A_nidulans_FGSC_A4:3382781-3383500 | WT_5hasex | WT_veg | OK     | 89,619    | 21,8907   | -2,03349      | 3,24985       | 0,00115467 | 0,00883908 | yes |
| AN0495 | ChrVIII_A_nidulans_FGSC_A4:3375363-3377796 | WT_5hasex | WT_veg | OK     | 92,9794   | 102,038   | 0,134121      | -0,277698     | 0,781244   | 0,910773   | no  |
| AN0497 | ChrVIII_A_nidulans_FGSC_A4:3369774-3371639 | WT_5hasex | WT_veg | OK     | 99,0952   | 82,4391   | -0,265486     | 0,404523      | 0,685828   | 0,8618     | no  |
| AN0498 | ChrVIII_A_nidulans_FGSC_A4:3365322-3367105 | WT_5hasex | WT_veg | OK     | 15,6288   | 21,1905   | 0,439216      | -0,735868     | 0,461811   | 0,721629   | no  |
| AN0499 | ChrVIII_A_nidulans_FGSC_A4:3362419-3363152 | WT_5hasex | WT_veg | NOTEST | 0,686735  | 0         | -1.79769e+308 | -1.79769e+308 | 0,107729   | 1          | no  |
| AN0500 | ChrVIII_A_nidulans_FGSC_A4:3359678-3361157 | WT_5hasex | WT_veg | OK     | 72,9451   | 64,0342   | -0,187969     | 0,300256      | 0,763982   | 0,90277    | no  |
| AN0501 | ChrVIII_A_nidulans_FGSC_A4:3355475-3357228 | WT_5hasex | WT_veg | OK     | 2,67218   | 1,00296   | -1,41375      | 1,26571       | 0,205616   | 0,462195   | no  |
| AN0502 | ChrVIII_A_nidulans_FGSC_A4:3352591-3355320 | WT_5hasex | WT_veg | OK     | 19,1902   | 48,3624   | 1,33351       | -2,62619      | 0,00863476 | 0,0463794  | yes |
| AN0505 | ChrVIII_A_nidulans_FGSC_A4:3344938-3346753 | WT_5hasex | WT_veg | OK     | 24,679    | 27,5349   | 0,157976      | -0,31377      | 0,753695   | 0,897678   | no  |
| AN0506 | ChrVIII_A_nidulans_FGSC_A4:3343787-3344779 | WT_5hasex | WT_veg | OK     | 12,8094   | 41,327    | 1,68988       | -2,82262      | 0,00476334 | 0,0286314  | yes |
| AN0507 | ChrVIII_A_nidulans_FGSC_A4:3339433-3341761 | WT_5hasex | WT_veg | OK     | 3,95631   | 5,11661   | 0,371036      | -0,529418     | 0,596516   | 0,810922   | no  |
| AN0508 | ChrVIII_A_nidulans_FGSC_A4:3336785-3337807 | WT_5hasex | WT_veg | NOTEST | 0,288032  | 0,236993  | -0,281384     | 0,0809876     | 0,935452   | 1          | no  |
| AN0509 | ChrVIII_A_nidulans_FGSC_A4:3330381-3335138 | WT_5hasex | WT_veg | NOTEST | 0,0917405 | 0         | -1.79769e+308 | -1.79769e+308 | 0,133588   | 1          | no  |
| AN0510 | ChrVIII_A_nidulans_FGSC_A4:3327973-3328864 | WT_5hasex | WT_veg | OK     | 1,99268   | 0,205719  | -3,27596      | 1,09093       | 0,275304   | 0,548347   | no  |
| AN0511 | ChrVIII_A_nidulans_FGSC_A4:3326451-3327304 | WT_5hasex | WT_veg | NOTEST | 0,308937  | 1,08351   | 1,81033       | -0,796332     | 0,425839   | 1          | no  |
| AN0512 | ChrVIII_A_nidulans_FGSC_A4:3321664-3322719 | WT_5hasex | WT_veg | OK     | 1,16767   | 9,20691   | 2,97909       | -3,27412      | 0,00105991 | 0,00824055 | yes |
| AN0515 | ChrVIII_A_nidulans_FGSC_A4:3313973-3315179 | WT_5hasex | WT_veg | NOTEST | 0,295807  | 0         | -1.79769e+308 | -1.79769e+308 | 0,23809    | 1          | no  |
| AN0517 | ChrVIII_A_nidulans_FGSC_A4:3299593-3305664 | WT_5hasex | WT_veg | NOTEST | 0,435936  | 0,147377  | -1,56461      | 1,06364       | 0,28749    | 1          | no  |
| AN0518 | ChrVIII_A_nidulans_FGSC_A4:3298231-3299200 | WT_5hasex | WT_veg | OK     | 5,2394    | 6,27498   | 0,260208      | -0,331478     | 0,740283   | 0,891064   | no  |
| AN0519 | ChrVIII_A_nidulans_FGSC_A4:3295252-3296340 | WT_5hasex | WT_veg | NOTEST | 0         | 0         | 0             | 0             | 1          | 1          | no  |
| AN0520 | ChrVIII_A_nidulans_FGSC_A4:3291153-3292291 | WT_5hasex | WT_veg | NOTEST | 0         | 0         | 0             | 0             | 1          | 1          | no  |
| AN0521 | ChrVIII_A_nidulans_FGSC_A4:3290039-3290976 | WT_5hasex | WT_veg | NOTEST | 0         | 0         | 0             | 0             | 1          | 1          | no  |
| AN0522 | ChrVIII_A_nidulans_FGSC_A4:3288680-3289103 | WT_5hasex | WT_veg | NOTEST | 0         | 0         | 0             | 0             | 1          | 1          | no  |
| AN0523 | ChrVIII_A_nidulans_FGSC_A4:3279991-3287961 | WT_5hasex | WT_veg | NOTEST | 0,186924  | 0,0807291 | -1,21129      | 0,776755      | 0,437303   | 1          | no  |
| AN0524 | ChrVIII_A_nidulans_FGSC_A4:3277942-3278960 | WT_5hasex | WT_veg | NOTEST | 0,565289  | 1,51714   | 1,42429       | -1,13259      | 0,257387   | 1          | no  |
| AN0525 | ChrVIII_A_nidulans_FGSC_A4:3276777-3277672 | WT_5hasex | WT_veg | NOTEST | 1,17459   | 1,86135   | 0,664191      | -0,567901     | 0,570102   | 1          | no  |
| AN0526 | ChrVIII_A_nidulans_FGSC_A4:3275171-3276281 | WT_5hasex | WT_veg | NOTEST | 1,31805   | 0         | -1.79769e+308 | -1.79769e+308 | 0,0517751  | 1          | no  |
| AN0527 | ChrVIII_A_nidulans_FGSC_A4:3274184-3274511 | WT_5hasex | WT_veg | OK     | 3,57559   | 0         | -1.79769e+308 | -1.79769e+308 | 0,0368957  | 0,142098   | no  |
| AN0528 | ChrVIII_A_nidulans_FGSC_A4:3272112-3273399 | WT_5hasex | WT_veg | OK     | 14,0786   | 0,154816  | -6,50681      | 2,2027        | 0,0276159  | 0,113786   | no  |
| AN0529 | ChrVIII_A_nidulans_FGSC_A4:3270830-3271628 | WT_5hasex | WT_veg | OK     | 5,04501   | 0,797014  | -2,66218      | 1,82542       | 0,0679378  | 0,220807   | no  |
| AN0530 | ChrVIII_A_nidulans_FGSC_A4:3268887-3270307 | WT_5hasex | WT_veg | NOTEST | 1,34457   | 0         | -1.79769e+308 | -1.79769e+308 | 0,0244862  | 1          | no  |
| AN0531 | ChrVIII_A_nidulans_FGSC_A4:3268048-3268535 | WT_5hasex | WT_veg | OK     | 30,1217   | 3,79743   | -2,98771      | 2,92655       | 0,0034275  | 0,021874   | yes |
| AN0532 | ChrVIII_A_nidulans_FGSC_A4:3266161-3267486 | WT_5hasex | WT_veg | OK     | 8,50927   | 4,16309   | -1,03138      | 1,35531       | 0,175319   | 0,419597   | no  |
| AN0533 | ChrVIII_A_nidulans_FGSC_A4:3263014-3265156 | WT_5hasex | WT_veg | NOTEST | 0,316078  | 0,423468  | 0,421973      | -0,268936     | 0,787979   | 1          | no  |
| AN0534 | ChrVIII_A_nidulans_FGSC_A4:3261199-3261931 | WT_5hasex | WT_veg | NOTEST | 0         | 0         | 0             | 0             | 1          | 1          | no  |
| AN0535 | ChrVIII_A_nidulans_FGSC_A4:3258966-3259620 | WT_5hasex | WT_veg | OK     | 1,75304   | 5,60746   | 1,67749       | -1,54118      | 0,123273   | 0,333265   | no  |
| AN0536 | ChrVIII_A_nidulans_FGSC_A4:3257569-3257965 | WT_5hasex | WT_veg | OK     | 4,47381   | 3,99893   | -0,161888     | 0,108978      | 0,91322    | 0,967205   | no  |

## Supplementary table 1

|        |                                            |           |        |        |          |          |               |               |            |            |     |
|--------|--------------------------------------------|-----------|--------|--------|----------|----------|---------------|---------------|------------|------------|-----|
| AN0537 | ChrVIII_A_nidulans_FGSC_A4:3255556-3256069 | WT_5hasex | WT_veg | OK     | 2,87457  | 9,99135  | 1,79733       | -1,8041       | 0,0712153  | 0,228274   | no  |
| AN0538 | ChrVIII_A_nidulans_FGSC_A4:3253627-3254414 | WT_5hasex | WT_veg | OK     | 6,34553  | 7,52343  | 0,245648      | -0,250504     | 0,802198   | 0,920043   | no  |
| AN0539 | ChrVIII_A_nidulans_FGSC_A4:3247158-3251399 | WT_5hasex | WT_veg | OK     | 0,923409 | 16,8231  | 4,18733       | -5,2952       | 1,1889E-07 | 2,7157E-06 | yes |
| AN0540 | ChrVIII_A_nidulans_FGSC_A4:3243012-3244010 | WT_5hasex | WT_veg | OK     | 3,70774  | 15,2691  | 2,042         | -2,44239      | 0,0145904  | 0,070043   | no  |
| AN0541 | ChrVIII_A_nidulans_FGSC_A4:3237398-3242950 | WT_5hasex | WT_veg | NOTEST | 0,709433 | 0,314468 | -1,17375      | 1,13051       | 0,258259   | 1          | no  |
| AN0542 | ChrVIII_A_nidulans_FGSC_A4:3233916-3235837 | WT_5hasex | WT_veg | NOTEST | 0,132849 | 0        | -1.79769e+308 | -1.79769e+308 | 0,224063   | 1          | no  |
| AN0543 | ChrVIII_A_nidulans_FGSC_A4:3230973-3232741 | WT_5hasex | WT_veg | NOTEST | 0,709861 | 0        | -1.79769e+308 | -1.79769e+308 | 0,0630924  | 1          | no  |
| AN0544 | ChrVIII_A_nidulans_FGSC_A4:3227948-3228719 | WT_5hasex | WT_veg | NOTEST | 0        | 0        | 0             | 0             | 1          | 1          | no  |
| AN0545 | ChrVIII_A_nidulans_FGSC_A4:3224345-3225100 | WT_5hasex | WT_veg | NOTEST | 0        | 0        | 0             | 0             | 1          | 1          | no  |
| AN0546 | ChrVIII_A_nidulans_FGSC_A4:3223452-3224045 | WT_5hasex | WT_veg | OK     | 32,9754  | 32,1015  | -0,0387524    | 0,0493849     | 0,960613   | 0,985358   | no  |
| AN0547 | ChrVIII_A_nidulans_FGSC_A4:3216311-3217669 | WT_5hasex | WT_veg | NOTEST | 0,15817  | 0        | -1.79769e+308 | -1.79769e+308 | 0,165569   | 1          | no  |
| AN0548 | ChrVIII_A_nidulans_FGSC_A4:3214951-3215425 | WT_5hasex | WT_veg | NOTEST | 0        | 0        | 0             | 0             | 1          | 1          | no  |
| AN0549 | ChrVIII_A_nidulans_FGSC_A4:3210662-3214397 | WT_5hasex | WT_veg | NOTEST | 0,548651 | 0        | -1.79769e+308 | -1.79769e+308 | 0,0307566  | 1          | no  |
| AN0550 | ChrVIII_A_nidulans_FGSC_A4:3204604-3209147 | WT_5hasex | WT_veg | NOTEST | 0        | 0,190332 | 1.79769e+308  | 1.79769e+308  | 0,123323   | 1          | no  |
| AN0551 | ChrVIII_A_nidulans_FGSC_A4:3201122-3202996 | WT_5hasex | WT_veg | OK     | 5,57845  | 10,3399  | 0,890282      | -1,36232      | 0,173098   | 0,415897   | no  |
| AN0553 | ChrVIII_A_nidulans_FGSC_A4:3193008-3194180 | WT_5hasex | WT_veg | OK     | 50,8964  | 22,4684  | -1,17967      | 2,29895       | 0,021508   | 0,0941493  | no  |
| AN0557 | ChrVIII_A_nidulans_FGSC_A4:3176774-3180378 | WT_5hasex | WT_veg | OK     | 62,9389  | 163,772  | 1,37966       | -2,78861      | 0,0052934  | 0,0311353  | yes |
| AN0559 | ChrVIII_A_nidulans_FGSC_A4:3172883-3173763 | WT_5hasex | WT_veg | OK     | 160,721  | 302,565  | 0,912686      | -1,8433       | 0,0652854  | 0,214542   | no  |
| AN0560 | ChrVIII_A_nidulans_FGSC_A4:3170301-3172681 | WT_5hasex | WT_veg | OK     | 15,9161  | 27,0901  | 0,767282      | -1,46923      | 0,14177    | 0,365297   | no  |
| AN0561 | ChrVIII_A_nidulans_FGSC_A4:3167833-3170218 | WT_5hasex | WT_veg | OK     | 11,6231  | 10,4498  | -0,153523     | 0,283669      | 0,776664   | 0,908721   | no  |
| AN0562 | ChrVIII_A_nidulans_FGSC_A4:3165373-3167150 | WT_5hasex | WT_veg | OK     | 18,0751  | 14,0659  | -0,361804     | 0,665967      | 0,505432   | 0,753397   | no  |
| AN0563 | ChrVIII_A_nidulans_FGSC_A4:3164067-3165222 | WT_5hasex | WT_veg | NOTEST | 0,771481 | 1,2394   | 0,683943      | -0,58479      | 0,558689   | 1          | no  |
| AN0564 | ChrVIII_A_nidulans_FGSC_A4:3162012-3163770 | WT_5hasex | WT_veg | OK     | 9,52397  | 15,7985  | 0,73015       | -1,21166      | 0,225642   | 0,488217   | no  |
| AN0566 | ChrVIII_A_nidulans_FGSC_A4:3148614-3151952 | WT_5hasex | WT_veg | OK     | 21,2956  | 168,597  | 2,98495       | -5,95499      | 2,6009E-09 | 8,4287E-08 | yes |
| AN0567 | ChrVIII_A_nidulans_FGSC_A4:3145730-3148146 | WT_5hasex | WT_veg | OK     | 4,05431  | 1,47307  | -1,46063      | 1,69624       | 0,0898396  | 0,268873   | no  |
| AN0568 | ChrVIII_A_nidulans_FGSC_A4:3142115-3143861 | WT_5hasex | WT_veg | OK     | 10,3272  | 14,3799  | 0,477602      | -0,822124     | 0,411006   | 0,681003   | no  |
| AN0569 | ChrVIII_A_nidulans_FGSC_A4:3138039-3140749 | WT_5hasex | WT_veg | OK     | 10,3207  | 17,6305  | 0,772529      | -1,42758      | 0,153412   | 0,384719   | no  |
| AN0570 | ChrVIII_A_nidulans_FGSC_A4:3136647-3137574 | WT_5hasex | WT_veg | OK     | 1826,15  | 3119,09  | 0,772319      | -1,30022      | 0,193526   | 0,445434   | no  |
| AN0571 | ChrVIII_A_nidulans_FGSC_A4:3135086-3136136 | WT_5hasex | WT_veg | OK     | 123,795  | 268,598  | 1,1175        | -2,33359      | 0,019617   | 0,0878008  | no  |
| AN0572 | ChrVIII_A_nidulans_FGSC_A4:3132646-3134713 | WT_5hasex | WT_veg | OK     | 2,6948   | 20,8911  | 2,95464       | -4,32688      | 1,5123E-05 | 0,00020861 | yes |
| AN0573 | ChrVIII_A_nidulans_FGSC_A4:3128655-3131886 | WT_5hasex | WT_veg | OK     | 60,6032  | 126,903  | 1,06626       | -2,15254      | 0,0313545  | 0,125624   | no  |
| AN0574 | ChrVIII_A_nidulans_FGSC_A4:3126481-3127558 | WT_5hasex | WT_veg | OK     | 22,2626  | 43,3078  | 0,960008      | -1,71369      | 0,0865865  | 0,262166   | no  |
| AN0575 | ChrVIII_A_nidulans_FGSC_A4:3122951-3125879 | WT_5hasex | WT_veg | OK     | 45,4383  | 41,8595  | -0,118355     | 0,245382      | 0,80616    | 0,922223   | no  |
| AN0576 | ChrVIII_A_nidulans_FGSC_A4:3114184-3119333 | WT_5hasex | WT_veg | OK     | 17,4197  | 14,3202  | -0,282664     | 0,580632      | 0,561489   | 0,789795   | no  |
| AN0577 | ChrVIII_A_nidulans_FGSC_A4:3112553-3113458 | WT_5hasex | WT_veg | OK     | 8,15517  | 2,43222  | -1,74544      | 1,65331       | 0,0982681  | 0,285779   | no  |
| AN0578 | ChrVIII_A_nidulans_FGSC_A4:3107478-3108599 | WT_5hasex | WT_veg | OK     | 6,4498   | 16,5737  | 1,36157       | -1,9612       | 0,0498553  | 0,177204   | no  |
| AN0579 | ChrVIII_A_nidulans_FGSC_A4:3105527-3106673 | WT_5hasex | WT_veg | OK     | 135,905  | 176,064  | 0,373498      | -0,770008     | 0,441295   | 0,705432   | no  |
| AN0580 | ChrVIII_A_nidulans_FGSC_A4:3104831-3105430 | WT_5hasex | WT_veg | OK     | 54,5254  | 111,417  | 1,03097       | -1,90701      | 0,0565193  | 0,193574   | no  |
| AN0581 | ChrVIII_A_nidulans_FGSC_A4:3101949-3103922 | WT_5hasex | WT_veg | OK     | 27,7848  | 32,5806  | 0,229719      | -0,463006     | 0,64336    | 0,83789    | no  |
| AN0582 | ChrVIII_A_nidulans_FGSC_A4:3100804-3101754 | WT_5hasex | WT_veg | OK     | 50,6861  | 91,3329  | 0,849544      | -1,68294      | 0,0923867  | 0,27402    | no  |
| AN0583 | ChrVIII_A_nidulans_FGSC_A4:3097636-3100523 | WT_5hasex | WT_veg | OK     | 7,80146  | 58,472   | 2,90593       | -5,28688      | 1,2442E-07 | 2,8273E-06 | yes |
| AN0584 | ChrVIII_A_nidulans_FGSC_A4:3090714-3091483 | WT_5hasex | WT_veg | NOTEST | 1,37041  | 0        | -1.79769e+308 | -1.79769e+308 | 0,133588   | 1          | no  |
| AN0585 | ChrVIII_A_nidulans_FGSC_A4:3087344-3089074 | WT_5hasex | WT_veg | OK     | 28,8333  | 13,5978  | -1,08437      | 1,82408       | 0,0681402  | 0,221287   | no  |
| AN0586 | ChrVIII_A_nidulans_FGSC_A4:3074299-3076460 | WT_5hasex | WT_veg | NOTEST | 0,29005  | 0,502457 | 0,792697      | -0,464911     | 0,641995   | 1          | no  |
| AN0587 | ChrVIII_A_nidulans_FGSC_A4:3070633-3072703 | WT_5hasex | WT_veg | OK     | 12,1554  | 0,935818 | -3,69923      | 3,9152        | 9,0331E-05 | 0,00100491 | yes |
| AN0588 | ChrVIII_A_nidulans_FGSC_A4:3068553-3070127 | WT_5hasex | WT_veg | OK     | 3,02309  | 0        | -1.79769e+308 | -1.79769e+308 | 0,0121372  | 0,0607055  | no  |
| AN0589 | ChrVIII_A_nidulans_FGSC_A4:3063549-3066087 | WT_5hasex | WT_veg | OK     | 8,3381   | 59,5824  | 2,8371        | -5,11343      | 3,1636E-07 | 6,5917E-06 | yes |
| AN0590 | ChrVIII_A_nidulans_FGSC_A4:3062082-3063364 | WT_5hasex | WT_veg | OK     | 17,9409  | 41,1112  | 1,19628       | -2,16207      | 0,0306127  | 0,123227   | no  |
| AN0591 | ChrVIII_A_nidulans_FGSC_A4:3060919-3061756 | WT_5hasex | WT_veg | OK     | 28,9748  | 80,5917  | 1,47583       | -2,68096      | 0,00734113 | 0,0406864  | yes |
| AN0592 | ChrVIII_A_nidulans_FGSC_A4:3057870-3059978 | WT_5hasex | WT_veg | NOTEST | 0,284335 | 0        | -1.79769e+308 | -1.79769e+308 | 0,0703913  | 1          | no  |
| AN0593 | ChrVIII_A_nidulans_FGSC_A4:3055397-3056864 | WT_5hasex | WT_veg | OK     | 30,8473  | 64,1649  | 1,05664       | -1,84093      | 0,0656321  | 0,215344   | no  |
| AN0594 | ChrVIII_A_nidulans_FGSC_A4:3046936-3054819 | WT_5hasex | WT_veg | OK     | 10,6617  | 13,0095  | 0,28712       | -0,565614     | 0,571657   | 0,79615    | no  |
| AN0595 | ChrVIII_A_nidulans_FGSC_A4:3041928-3044349 | WT_5hasex | WT_veg | OK     | 231,029  | 254,075  | 0,137178      | -0,264279     | 0,791565   | 0,915381   | no  |

## Supplementary table 1

|        |                                            |           |        |        |           |         |               |               |            |            |     |
|--------|--------------------------------------------|-----------|--------|--------|-----------|---------|---------------|---------------|------------|------------|-----|
| AN0597 | ChrVIII_A_nidulans_FGSC_A4:3036590-3037163 | WT_5hasex | WT_veg | OK     | 53,3403   | 99,6408 | 0,90151       | -1,68783      | 0,0914447  | 0,271803   | no  |
| AN0598 | ChrVIII_A_nidulans_FGSC_A4:3035442-3036138 | WT_5hasex | WT_veg | OK     | 17,1736   | 16,6548 | -0,0442591    | 0,0621741     | 0,950424   | 0,981749   | no  |
| AN0599 | ChrVIII_A_nidulans_FGSC_A4:3032484-3033859 | WT_5hasex | WT_veg | OK     | 14,1017   | 62,5218 | 2,14849       | -3,75027      | 0,00017665 | 0,00179253 | yes |
| AN0600 | ChrVIII_A_nidulans_FGSC_A4:3031138-3032055 | WT_5hasex | WT_veg | OK     | 175,062   | 613,512 | 1,80922       | -3,64192      | 0,00027062 | 0,00258492 | yes |
| AN0601 | ChrVIII_A_nidulans_FGSC_A4:3028032-3029889 | WT_5hasex | WT_veg | OK     | 23,2693   | 156,664 | 2,75117       | -5,51758      | 3,4369E-08 | 8,8633E-07 | yes |
| AN0602 | ChrVIII_A_nidulans_FGSC_A4:3024881-3026610 | WT_5hasex | WT_veg | OK     | 6,85802   | 11,5467 | 0,751621      | -1,18499      | 0,236023   | 0,501423   | no  |
| AN0604 | ChrVIII_A_nidulans_FGSC_A4:3021846-3023680 | WT_5hasex | WT_veg | OK     | 37,1094   | 51,0912 | 0,461292      | -0,845424     | 0,397874   | 0,670593   | no  |
| AN0605 | ChrVIII_A_nidulans_FGSC_A4:3017424-3019938 | WT_5hasex | WT_veg | OK     | 7,80182   | 14,0934 | 0,853142      | -1,51354      | 0,130143   | 0,345618   | no  |
| AN0608 | ChrVIII_A_nidulans_FGSC_A4:2997270-2998651 | WT_5hasex | WT_veg | OK     | 9,81317   | 3,46075 | -1,50364      | 2,14696       | 0,0317963  | 0,126977   | no  |
| AN0609 | ChrVIII_A_nidulans_FGSC_A4:2994581-2996615 | WT_5hasex | WT_veg | OK     | 13,7727   | 1,01079 | -3,76826      | 4,2338        | 2,2977E-05 | 0,00030146 | yes |
| AN0610 | ChrVIII_A_nidulans_FGSC_A4:2989273-2990609 | WT_5hasex | WT_veg | OK     | 18,1835   | 46,9641 | 1,36893       | -2,11747      | 0,0342196  | 0,134441   | no  |
| AN0611 | ChrVIII_A_nidulans_FGSC_A4:2986729-2987289 | WT_5hasex | WT_veg | NOTEST | 0         | 0       | 0             | 0             | 1          | 1          | no  |
| AN0612 | ChrVIII_A_nidulans_FGSC_A4:2984611-2985467 | WT_5hasex | WT_veg | NOTEST | 0,460871  | 0       | -1.79769e+308 | -1.79769e+308 | 0,137528   | 1          | no  |
| AN0613 | ChrVIII_A_nidulans_FGSC_A4:2982858-2984133 | WT_5hasex | WT_veg | NOTEST | 0         | 0       | 0             | 0             | 1          | 1          | no  |
| AN0614 | ChrVIII_A_nidulans_FGSC_A4:2980695-2982347 | WT_5hasex | WT_veg | NOTEST | 0         | 0       | 0             | 0             | 1          | 1          | no  |
| AN0615 | ChrVIII_A_nidulans_FGSC_A4:2979315-2980200 | WT_5hasex | WT_veg | NOTEST | 1,41809   | 3,02511 | 1,09304       | -1,12355      | 0,261204   | 1          | no  |
| AN0616 | ChrVIII_A_nidulans_FGSC_A4:2975924-2976745 | WT_5hasex | WT_veg | NOTEST | 0         | 0       | 0             | 0             | 1          | 1          | no  |
| AN0617 | ChrVIII_A_nidulans_FGSC_A4:2974834-2975812 | WT_5hasex | WT_veg | OK     | 2,01637   | 6,14744 | 1,60822       | -1,968        | 0,049068   | 0,175297   | no  |
| AN0618 | ChrVIII_A_nidulans_FGSC_A4:2972979-2973946 | WT_5hasex | WT_veg | NOTEST | 0         | 0       | 0             | 0             | 1          | 1          | no  |
| AN0619 | ChrVIII_A_nidulans_FGSC_A4:2969800-2972349 | WT_5hasex | WT_veg | NOTEST | 0,0748851 | 0       | -1.79769e+308 | -1.79769e+308 | 0,165569   | 1          | no  |
| AN0620 | ChrVIII_A_nidulans_FGSC_A4:2968350-2969543 | WT_5hasex | WT_veg | OK     | 13,909    | 76,1439 | 2,45271       | -4,13788      | 3,5052E-05 | 0,00043943 | yes |
| AN0621 | ChrVIII_A_nidulans_FGSC_A4:2965476-2967171 | WT_5hasex | WT_veg | NOTEST | 0,610798  | 2,57512 | 2,07587       | -2,10366      | 0,0354085  | 1          | no  |
| AN0622 | ChrVIII_A_nidulans_FGSC_A4:2957269-2958854 | WT_5hasex | WT_veg | NOTEST | 0         | 0       | 0             | 0             | 1          | 1          | no  |
| AN0623 | ChrVIII_A_nidulans_FGSC_A4:2954050-2956474 | WT_5hasex | WT_veg | OK     | 10,6578   | 22,412  | 1,07236       | -1,9545       | 0,0506418  | 0,179173   | no  |
| AN0624 | ChrVIII_A_nidulans_FGSC_A4:2951308-2953020 | WT_5hasex | WT_veg | OK     | 21,5452   | 32,7152 | 0,602598      | -1,1417       | 0,253579   | 0,522903   | no  |
| AN0625 | ChrVIII_A_nidulans_FGSC_A4:2949383-2951291 | WT_5hasex | WT_veg | OK     | 7,99748   | 13,6158 | 0,767668      | -1,25488      | 0,209523   | 0,467389   | no  |
| AN0626 | ChrVIII_A_nidulans_FGSC_A4:2948390-2949137 | WT_5hasex | WT_veg | OK     | 22,3697   | 29,9011 | 0,418655      | -0,688929     | 0,490868   | 0,74323    | no  |
| AN0627 | ChrVIII_A_nidulans_FGSC_A4:2946869-2948360 | WT_5hasex | WT_veg | OK     | 95,0559   | 118,296 | 0,315554      | -0,602018     | 0,547162   | 0,780414   | no  |
| AN0628 | ChrVIII_A_nidulans_FGSC_A4:2941241-2942481 | WT_5hasex | WT_veg | OK     | 40,8203   | 51,0987 | 0,324         | -0,65793      | 0,510583   | 0,756416   | no  |
| AN0629 | ChrVIII_A_nidulans_FGSC_A4:2940356-2941231 | WT_5hasex | WT_veg | OK     | 11,5483   | 21,1237 | 0,871191      | -1,3399       | 0,180278   | 0,42673    | no  |
| AN0630 | ChrVIII_A_nidulans_FGSC_A4:2939072-2939721 | WT_5hasex | WT_veg | OK     | 573,334   | 1083,02 | 0,917615      | -1,87096      | 0,0613507  | 0,205294   | no  |
| AN0631 | ChrVIII_A_nidulans_FGSC_A4:2938121-2938934 | WT_5hasex | WT_veg | OK     | 26,8443   | 42,8944 | 0,676173      | -1,21825      | 0,223127   | 0,484998   | no  |
| AN0632 | ChrVIII_A_nidulans_FGSC_A4:2936627-2937796 | WT_5hasex | WT_veg | OK     | 25,6962   | 55,5731 | 1,11283       | -2,11428      | 0,0344917  | 0,135216   | no  |
| AN0633 | ChrVIII_A_nidulans_FGSC_A4:2934187-2936452 | WT_5hasex | WT_veg | OK     | 29,4012   | 42,8659 | 0,543957      | -1,11252      | 0,265915   | 0,537347   | no  |
| AN0634 | ChrVIII_A_nidulans_FGSC_A4:2932924-2933988 | WT_5hasex | WT_veg | OK     | 63,9131   | 54,7183 | -0,224089     | 0,455926      | 0,648444   | 0,840677   | no  |
| AN0635 | ChrVIII_A_nidulans_FGSC_A4:2931783-2932422 | WT_5hasex | WT_veg | OK     | 2,48338   | 12,8781 | 2,37455       | -2,51356      | 0,011952   | 0,0599684  | no  |
| AN0636 | ChrVIII_A_nidulans_FGSC_A4:2929851-2931751 | WT_5hasex | WT_veg | OK     | 19,0061   | 43,5103 | 1,19489       | -2,27607      | 0,0228417  | 0,0984576  | no  |
| AN0637 | ChrVIII_A_nidulans_FGSC_A4:2927088-2929650 | WT_5hasex | WT_veg | OK     | 8,70645   | 34,3507 | 1,98018       | -3,61612      | 0,00029905 | 0,00281291 | yes |
| AN0638 | ChrVIII_A_nidulans_FGSC_A4:2925199-2926699 | WT_5hasex | WT_veg | OK     | 5,29491   | 2,78885 | -0,924937     | 1,1867        | 0,235347   | 0,500676   | no  |
| AN0639 | ChrVIII_A_nidulans_FGSC_A4:2923135-2924596 | WT_5hasex | WT_veg | OK     | 2,31519   | 2,16832 | -0,0945487    | 0,110884      | 0,911708   | 0,966505   | no  |
| AN0641 | ChrVIII_A_nidulans_FGSC_A4:2919341-2920297 | WT_5hasex | WT_veg | OK     | 1334,88   | 2263,03 | 0,761551      | -1,34546      | 0,178478   | 0,423866   | no  |
| AN0643 | ChrVIII_A_nidulans_FGSC_A4:2913852-2914710 | WT_5hasex | WT_veg | OK     | 50,9677   | 57,8141 | 0,181839      | -0,357979     | 0,720359   | 0,880323   | no  |
| AN0644 | ChrVIII_A_nidulans_FGSC_A4:2910456-2912158 | WT_5hasex | WT_veg | OK     | 111,694   | 510,266 | 2,1917        | -4,30359      | 1,6805E-05 | 0,00022957 | yes |
| AN0646 | ChrVIII_A_nidulans_FGSC_A4:2904639-2908435 | WT_5hasex | WT_veg | OK     | 57,4083   | 59,6464 | 0,0551753     | -0,112707     | 0,910263   | 0,965974   | no  |
| AN0647 | ChrVIII_A_nidulans_FGSC_A4:2903522-2903957 | WT_5hasex | WT_veg | OK     | 26,8226   | 165,878 | 2,6286        | -4,06334      | 4,8376E-05 | 0,00058196 | yes |
| AN0649 | ChrVIII_A_nidulans_FGSC_A4:2890920-2893240 | WT_5hasex | WT_veg | NOTEST | 1,04663   | 1,2077  | 0,206514      | -0,209786     | 0,833834   | 1          | no  |
| AN0650 | ChrVIII_A_nidulans_FGSC_A4:2885326-2888687 | WT_5hasex | WT_veg | OK     | 44,3757   | 44,9829 | 0,0196076     | -0,0387558    | 0,969085   | 0,988771   | no  |
| AN0652 | ChrVIII_A_nidulans_FGSC_A4:2881536-2882287 | WT_5hasex | WT_veg | NOTEST | 0         | 2,37973 | 1.79769e+308  | 1.79769e+308  | 0,123323   | 1          | no  |
| AN0653 | ChrVIII_A_nidulans_FGSC_A4:2880084-2881104 | WT_5hasex | WT_veg | OK     | 21,2348   | 32,6192 | 0,619291      | -1,08468      | 0,278064   | 0,551335   | no  |
| AN0654 | ChrVIII_A_nidulans_FGSC_A4:2878590-2879983 | WT_5hasex | WT_veg | OK     | 55,0023   | 181,702 | 1,72401       | -3,46045      | 0,00053928 | 0,00464031 | yes |
| AN0656 | ChrVIII_A_nidulans_FGSC_A4:2874761-2875738 | WT_5hasex | WT_veg | OK     | 32,0549   | 18,1692 | -0,819054     | 1,32363       | 0,185627   | 0,434504   | no  |
| AN0657 | ChrVIII_A_nidulans_FGSC_A4:2873575-2874708 | WT_5hasex | WT_veg | OK     | 25,1737   | 30,8451 | 0,293126      | -0,535139     | 0,592554   | 0,808384   | no  |
| AN0658 | ChrVIII_A_nidulans_FGSC_A4:2870931-2872962 | WT_5hasex | WT_veg | OK     | 12,4483   | 10,284  | -0,275558     | 0,475708      | 0,634283   | 0,83269    | no  |

## Supplementary table 1

|        |                                            |           |        |        |          |         |           |           |            |            |     |
|--------|--------------------------------------------|-----------|--------|--------|----------|---------|-----------|-----------|------------|------------|-----|
| AN0659 | ChrVIII_A_nidulans_FGSC_A4:2865115-2869680 | WT_5hasex | WT_veg | OK     | 11,4166  | 27,408  | 1,26347   | -2,56143  | 0,0104243  | 0,0538289  | no  |
| AN0661 | ChrVIII_A_nidulans_FGSC_A4:2858402-2861141 | WT_5hasex | WT_veg | OK     | 16,5053  | 39,5125 | 1,25938   | -2,55495  | 0,0106202  | 0,0546249  | no  |
| AN0662 | ChrVIII_A_nidulans_FGSC_A4:2856984-2858322 | WT_5hasex | WT_veg | OK     | 32,1133  | 49,0745 | 0,611804  | -1,1504   | 0,249979   | 0,518358   | no  |
| AN0663 | ChrVIII_A_nidulans_FGSC_A4:2852007-2852776 | WT_5hasex | WT_veg | OK     | 12,2448  | 16,0509 | 0,390481  | -0,493077 | 0,621958   | 0,825416   | no  |
| AN0664 | ChrVIII_A_nidulans_FGSC_A4:2843545-2846971 | WT_5hasex | WT_veg | OK     | 14,0808  | 44,1467 | 1,64858   | -3,19292  | 0,0014084  | 0,0104182  | yes |
| AN0665 | ChrVIII_A_nidulans_FGSC_A4:2841447-2842614 | WT_5hasex | WT_veg | OK     | 128,504  | 154,597 | 0,266696  | -0,553854 | 0,579679   | 0,800893   | no  |
| AN0666 | ChrVIII_A_nidulans_FGSC_A4:2839911-2841218 | WT_5hasex | WT_veg | OK     | 2,54781  | 10,3035 | 2,01581   | -2,61003  | 0,00905338 | 0,048164   | yes |
| AN0668 | ChrVIII_A_nidulans_FGSC_A4:2836044-2837587 | WT_5hasex | WT_veg | OK     | 51,0064  | 99,6978 | 0,966884  | -1,9919   | 0,0463821  | 0,168396   | no  |
| AN0669 | ChrVIII_A_nidulans_FGSC_A4:2834059-2835732 | WT_5hasex | WT_veg | OK     | 14,0987  | 25,4146 | 0,8501    | -1,5451   | 0,122322   | 0,331849   | no  |
| AN0671 | ChrVIII_A_nidulans_FGSC_A4:2829636-2831834 | WT_5hasex | WT_veg | OK     | 21,333   | 27,0657 | 0,343376  | -0,682221 | 0,495099   | 0,746236   | no  |
| AN0672 | ChrVIII_A_nidulans_FGSC_A4:2828261-2829469 | WT_5hasex | WT_veg | OK     | 49,1452  | 109,949 | 1,16171   | -2,29389  | 0,0217968  | 0,0951392  | no  |
| AN0673 | ChrVIII_A_nidulans_FGSC_A4:2825896-2827893 | WT_5hasex | WT_veg | OK     | 152,76   | 173,395 | 0,182791  | -0,371046 | 0,710603   | 0,875486   | no  |
| AN0674 | ChrVIII_A_nidulans_FGSC_A4:2824386-2825642 | WT_5hasex | WT_veg | OK     | 42,2773  | 72,0786 | 0,769687  | -1,52901  | 0,126262   | 0,338594   | no  |
| AN0675 | ChrVIII_A_nidulans_FGSC_A4:2822347-2823466 | WT_5hasex | WT_veg | OK     | 20,1388  | 52,3151 | 1,37725   | -2,45643  | 0,0140324  | 0,0679096  | no  |
| AN0677 | ChrVIII_A_nidulans_FGSC_A4:2815381-2816497 | WT_5hasex | WT_veg | OK     | 2061,34  | 3223,21 | 0,644917  | -0,93091  | 0,3519     | 0,627493   | no  |
| AN0678 | ChrVIII_A_nidulans_FGSC_A4:2814303-2815069 | WT_5hasex | WT_veg | OK     | 42,9842  | 78,7674 | 0,873792  | -1,50843  | 0,131445   | 0,347756   | no  |
| AN0680 | ChrVIII_A_nidulans_FGSC_A4:2808710-2810718 | WT_5hasex | WT_veg | OK     | 6,92587  | 12,1877 | 0,81536   | -1,28608  | 0,198416   | 0,452374   | no  |
| AN0681 | ChrVIII_A_nidulans_FGSC_A4:2807046-2808300 | WT_5hasex | WT_veg | OK     | 16,3538  | 14,9801 | -0,126576 | 0,214913  | 0,829835   | 0,932311   | no  |
| AN0682 | ChrVIII_A_nidulans_FGSC_A4:2805345-2806148 | WT_5hasex | WT_veg | OK     | 72,6616  | 86,9605 | 0,259167  | -0,522063 | 0,601627   | 0,814109   | no  |
| AN0683 | ChrVIII_A_nidulans_FGSC_A4:2800878-2802261 | WT_5hasex | WT_veg | OK     | 20,7042  | 46,4666 | 1,16627   | -1,97933  | 0,0477785  | 0,172176   | no  |
| AN0684 | ChrVIII_A_nidulans_FGSC_A4:2796634-2799248 | WT_5hasex | WT_veg | OK     | 66,4908  | 112,061 | 0,753052  | -1,4977   | 0,134212   | 0,352981   | no  |
| AN0685 | ChrVIII_A_nidulans_FGSC_A4:2794143-2795534 | WT_5hasex | WT_veg | OK     | 29,1566  | 63,9933 | 1,1341    | -2,2159   | 0,0266982  | 0,110859   | no  |
| AN0686 | ChrVIII_A_nidulans_FGSC_A4:2792836-2793753 | WT_5hasex | WT_veg | OK     | 266,751  | 469,573 | 0,815853  | -1,62639  | 0,103867   | 0,297471   | no  |
| AN0688 | ChrVIII_A_nidulans_FGSC_A4:2786504-2791251 | WT_5hasex | WT_veg | OK     | 158,651  | 349,629 | 1,14022   | -2,14646  | 0,0318366  | 0,127099   | no  |
| AN0690 | ChrVIII_A_nidulans_FGSC_A4:2778085-2779741 | WT_5hasex | WT_veg | OK     | 13,9609  | 15,6466 | 0,164457  | -0,292971 | 0,769544   | 0,905484   | no  |
| AN0691 | ChrVIII_A_nidulans_FGSC_A4:2777210-2777733 | WT_5hasex | WT_veg | OK     | 7,30136  | 47,5352 | 2,70276   | -3,85377  | 0,00011631 | 0,00125387 | yes |
| AN0692 | ChrVIII_A_nidulans_FGSC_A4:2775186-2777035 | WT_5hasex | WT_veg | OK     | 42,2495  | 76,7261 | 0,860784  | -1,74772  | 0,0805128  | 0,248764   | no  |
| AN0693 | ChrVIII_A_nidulans_FGSC_A4:2773753-2774363 | WT_5hasex | WT_veg | OK     | 526,073  | 4465,47 | 3,08548   | -5,88166  | 4,0616E-09 | 1,273E-07  | yes |
| AN0694 | ChrVIII_A_nidulans_FGSC_A4:2772139-2773030 | WT_5hasex | WT_veg | OK     | 93,0768  | 1366,23 | 3,87564   | -7,91627  | 2,4425E-15 | 1,9363E-13 | yes |
| AN0695 | ChrVIII_A_nidulans_FGSC_A4:2770857-2771951 | WT_5hasex | WT_veg | OK     | 130,223  | 733,173 | 2,49317   | -4,97524  | 6,5168E-07 | 1,2545E-05 | yes |
| AN0697 | ChrVIII_A_nidulans_FGSC_A4:2764396-2767495 | WT_5hasex | WT_veg | OK     | 34,4765  | 62,1634 | 0,850452  | -1,76274  | 0,0779437  | 0,243409   | no  |
| AN0698 | ChrVIII_A_nidulans_FGSC_A4:2760504-2763199 | WT_5hasex | WT_veg | OK     | 50,2842  | 65,7017 | 0,385826  | -0,809558 | 0,418194   | 0,686923   | no  |
| AN0699 | ChrVIII_A_nidulans_FGSC_A4:2755105-2756521 | WT_5hasex | WT_veg | OK     | 25,644   | 28,3006 | 0,142212  | -0,268826 | 0,788063   | 0,913502   | no  |
| AN0700 | ChrVIII_A_nidulans_FGSC_A4:2751898-2754313 | WT_5hasex | WT_veg | OK     | 20,5288  | 27,5063 | 0,422114  | -0,838429 | 0,40179    | 0,67332    | no  |
| AN0701 | ChrVIII_A_nidulans_FGSC_A4:2750274-2751330 | WT_5hasex | WT_veg | OK     | 13,0958  | 18,4994 | 0,498373  | -0,808341 | 0,418894   | 0,687275   | no  |
| AN0703 | ChrVIII_A_nidulans_FGSC_A4:2742932-2747319 | WT_5hasex | WT_veg | OK     | 23,5525  | 33,6254 | 0,513671  | -1,07128  | 0,284043   | 0,557803   | no  |
| AN0704 | ChrVIII_A_nidulans_FGSC_A4:2739017-2742336 | WT_5hasex | WT_veg | OK     | 9,58364  | 11,4071 | 0,251292  | -0,479513 | 0,631574   | 0,831384   | no  |
| AN0705 | ChrVIII_A_nidulans_FGSC_A4:2734834-2738241 | WT_5hasex | WT_veg | OK     | 72,1671  | 162,346 | 1,16966   | -2,34656  | 0,0189474  | 0,0854017  | no  |
| AN0706 | ChrVIII_A_nidulans_FGSC_A4:2731014-2734606 | WT_5hasex | WT_veg | OK     | 44,5648  | 59,9253 | 0,427262  | -0,859997 | 0,389791   | 0,663197   | no  |
| AN0707 | ChrVIII_A_nidulans_FGSC_A4:2726984-2730491 | WT_5hasex | WT_veg | OK     | 20,0129  | 72,0687 | 1,84844   | -3,82449  | 0,00013104 | 0,00139061 | yes |
| AN0709 | ChrVIII_A_nidulans_FGSC_A4:2717224-2720466 | WT_5hasex | WT_veg | OK     | 483,417  | 2423,28 | 2,32562   | -3,08242  | 0,00205328 | 0,0142857  | yes |
| AN0710 | ChrVIII_A_nidulans_FGSC_A4:2710156-2710838 | WT_5hasex | WT_veg | NOTEST | 0,277787 | 2,90748 | 3,38772   | -2,05717  | 0,0396699  | 1          | no  |
| AN0713 | ChrVIII_A_nidulans_FGSC_A4:2697116-2698718 | WT_5hasex | WT_veg | OK     | 5,40401  | 12,3614 | 1,19374   | -1,79147  | 0,0732173  | 0,232727   | no  |
| AN0714 | ChrVIII_A_nidulans_FGSC_A4:2694618-2695592 | WT_5hasex | WT_veg | OK     | 15,1698  | 78,4379 | 2,37035   | -4,01422  | 5,9643E-05 | 0,0006992  | yes |
| AN0715 | ChrVIII_A_nidulans_FGSC_A4:2691699-2694374 | WT_5hasex | WT_veg | OK     | 28,7524  | 47,4527 | 0,72281   | -1,49757  | 0,134245   | 0,352999   | no  |
| AN0716 | ChrVIII_A_nidulans_FGSC_A4:2689719-2691346 | WT_5hasex | WT_veg | OK     | 39,3429  | 102,93  | 1,38748   | -2,85237  | 0,00433948 | 0,0265403  | yes |
| AN0717 | ChrVIII_A_nidulans_FGSC_A4:2687748-2689352 | WT_5hasex | WT_veg | OK     | 35,4039  | 59,7263 | 0,754459  | -1,49685  | 0,134432   | 0,353232   | no  |
| AN0718 | ChrVIII_A_nidulans_FGSC_A4:2685401-2687664 | WT_5hasex | WT_veg | OK     | 3,04531  | 6,6066  | 1,11732   | -1,61291  | 0,106763   | 0,303296   | no  |
| AN0719 | ChrVIII_A_nidulans_FGSC_A4:2683272-2685056 | WT_5hasex | WT_veg | OK     | 31,7965  | 52,3587 | 0,71956   | -1,39609  | 0,162687   | 0,399171   | no  |
| AN0720 | ChrVIII_A_nidulans_FGSC_A4:2681233-2683106 | WT_5hasex | WT_veg | OK     | 62,4306  | 113,51  | 0,862499  | -1,77561  | 0,0757969  | 0,238585   | no  |
| AN0722 | ChrVIII_A_nidulans_FGSC_A4:2679902-2680600 | WT_5hasex | WT_veg | OK     | 101,487  | 75,5193 | -0,426373 | 0,837622  | 0,402243   | 0,673663   | no  |
| AN0723 | ChrVIII_A_nidulans_FGSC_A4:2676065-2677290 | WT_5hasex | WT_veg | OK     | 54,0524  | 297,586 | 2,46087   | -5,067    | 4,0414E-07 | 8,1858E-06 | yes |
| AN0725 | ChrVIII_A_nidulans_FGSC_A4:2667268-2668801 | WT_5hasex | WT_veg | OK     | 34,585   | 51,5829 | 0,576744  | -1,1598   | 0,246128   | 0,51387    | no  |



## Supplementary table 1

|        |                                            |           |        |        |          |          |               |               |            |            |     |
|--------|--------------------------------------------|-----------|--------|--------|----------|----------|---------------|---------------|------------|------------|-----|
| AN0727 | ChrVIII_A_nidulans_FGSC_A4:2646896-2648651 | WT_5hasex | WT_veg | OK     | 15,1564  | 54,6392  | 1,85001       | -3,43349      | 0,00059586 | 0,00505733 | yes |
| AN0728 | ChrVIII_A_nidulans_FGSC_A4:2644618-2646661 | WT_5hasex | WT_veg | OK     | 4,70896  | 46,3828  | 3,30011       | -5,28438      | 1,2614E-07 | 2,8589E-06 | yes |
| AN0732 | ChrVIII_A_nidulans_FGSC_A4:2633802-2636302 | WT_5hasex | WT_veg | OK     | 106,055  | 463,432  | 2,12754       | -3,59841      | 0,00032017 | 0,00297839 | yes |
| AN0735 | ChrVIII_A_nidulans_FGSC_A4:2627012-2627600 | WT_5hasex | WT_veg | OK     | 2,34397  | 2,88399  | 0,299113      | -0,189103     | 0,850012   | 0,941019   | no  |
| AN0736 | ChrVIII_A_nidulans_FGSC_A4:2622259-2623059 | WT_5hasex | WT_veg | OK     | 28,8933  | 49,7032  | 0,782603      | -1,2214       | 0,221935   | 0,483432   | no  |
| AN0737 | ChrVIII_A_nidulans_FGSC_A4:2618681-2620968 | WT_5hasex | WT_veg | NOTEST | 1,18499  | 2,62381  | 1,14679       | -1,37862      | 0,168012   | 1          | no  |
| AN0738 | ChrVIII_A_nidulans_FGSC_A4:2618681-2620968 | WT_5hasex | WT_veg | NOTEST | 0,365165 | 0        | -1.79769e+308 | -1.79769e+308 | 0,189621   | 1          | no  |
| AN0739 | ChrVIII_A_nidulans_FGSC_A4:2616473-2618122 | WT_5hasex | WT_veg | OK     | 4,21381  | 10,8569  | 1,36541       | -1,98615      | 0,0470172  | 0,170093   | no  |
| AN0740 | ChrVIII_A_nidulans_FGSC_A4:2613728-2615290 | WT_5hasex | WT_veg | OK     | 10,3836  | 37,0529  | 1,83528       | -3,07854      | 0,00208017 | 0,0144378  | yes |
| AN0742 | ChrVIII_A_nidulans_FGSC_A4:2605700-2608436 | WT_5hasex | WT_veg | OK     | 68,7991  | 162,76   | 1,24228       | -2,57937      | 0,00989795 | 0,0516966  | no  |
| AN0743 | ChrVIII_A_nidulans_FGSC_A4:2604246-2605371 | WT_5hasex | WT_veg | OK     | 14,1116  | 19,9648  | 0,500576      | -0,734953     | 0,462368   | 0,721825   | no  |
| AN0744 | ChrVIII_A_nidulans_FGSC_A4:2599376-2601191 | WT_5hasex | WT_veg | NOTEST | 1,60578  | 1,86211  | 0,213663      | -0,232511     | 0,816141   | 1          | no  |
| AN0745 | ChrVIII_A_nidulans_FGSC_A4:2596593-2598191 | WT_5hasex | WT_veg | OK     | 144,838  | 587,815  | 2,02092       | -3,90085      | 9,5856E-05 | 0,00105659 | yes |
| AN0746 | ChrVIII_A_nidulans_FGSC_A4:2595273-2596239 | WT_5hasex | WT_veg | OK     | 4,08558  | 9,19662  | 1,17056       | -1,46845      | 0,141983   | 0,365649   | no  |
| AN0747 | ChrVIII_A_nidulans_FGSC_A4:2593184-2595051 | WT_5hasex | WT_veg | OK     | 282,9    | 552,996  | 0,966976      | -1,85636      | 0,0634028  | 0,210081   | no  |
| AN0748 | ChrVIII_A_nidulans_FGSC_A4:2589337-2591711 | WT_5hasex | WT_veg | NOTEST | 0,141612 | 0        | -1.79769e+308 | -1.79769e+308 | 0,165569   | 1          | no  |
| AN0749 | ChrVIII_A_nidulans_FGSC_A4:2586487-2587417 | WT_5hasex | WT_veg | NOTEST | 0,221373 | 1,7979   | 3,02176       | -1,38699      | 0,165446   | 1          | no  |
| AN0750 | ChrVIII_A_nidulans_FGSC_A4:2582554-2585994 | WT_5hasex | WT_veg | OK     | 3,23645  | 2,72092  | -0,250315     | 0,335291      | 0,737405   | 0,889681   | no  |
| AN0751 | ChrVIII_A_nidulans_FGSC_A4:2573616-2575302 | WT_5hasex | WT_veg | OK     | 34,308   | 70,5905  | 1,04093       | -1,79498      | 0,0726564  | 0,231447   | no  |
| AN0752 | ChrVIII_A_nidulans_FGSC_A4:2569278-2570481 | WT_5hasex | WT_veg | OK     | 44,6402  | 168,978  | 1,92042       | -3,82187      | 0,00013244 | 0,00140322 | yes |
| AN0753 | ChrVIII_A_nidulans_FGSC_A4:2566889-2569000 | WT_5hasex | WT_veg | OK     | 114,902  | 238,212  | 1,05184       | -2,13664      | 0,0326271  | 0,129481   | no  |
| AN0754 | ChrVIII_A_nidulans_FGSC_A4:2565702-2566698 | WT_5hasex | WT_veg | OK     | 104,323  | 286,654  | 1,45825       | -3,04682      | 0,00231275 | 0,0157495  | yes |
| AN0755 | ChrVIII_A_nidulans_FGSC_A4:2564843-2565446 | WT_5hasex | WT_veg | OK     | 45,6816  | 117,407  | 1,36184       | -2,49013      | 0,0127696  | 0,0631931  | no  |
| AN0757 | ChrVIII_A_nidulans_FGSC_A4:2557204-2560431 | WT_5hasex | WT_veg | OK     | 28,9526  | 83,6981  | 1,5315        | -3,07202      | 0,00212618 | 0,0147006  | yes |
| AN0758 | ChrVIII_A_nidulans_FGSC_A4:2554979-2556622 | WT_5hasex | WT_veg | OK     | 2,63028  | 8,07037  | 1,61742       | -2,0884       | 0,0367618  | 0,141688   | no  |
| AN0759 | ChrVIII_A_nidulans_FGSC_A4:2553853-2554380 | WT_5hasex | WT_veg | OK     | 34,9236  | 23,9838  | -0,54214      | 0,753343      | 0,451244   | 0,713112   | no  |
| AN0760 | ChrVIII_A_nidulans_FGSC_A4:2551539-2553274 | WT_5hasex | WT_veg | NOTEST | 0,396135 | 0,983221 | 1,31152       | -0,882284     | 0,377623   | 1          | no  |
| AN0761 | ChrVIII_A_nidulans_FGSC_A4:2548582-2549968 | WT_5hasex | WT_veg | OK     | 17,767   | 18,1173  | 0,0281699     | -0,0419703    | 0,966522   | 0,98772    | no  |
| AN0762 | ChrVIII_A_nidulans_FGSC_A4:2544132-2546562 | WT_5hasex | WT_veg | OK     | 37,8852  | 57,2842  | 0,596503      | -1,22971      | 0,218805   | 0,479642   | no  |
| AN0764 | ChrVIII_A_nidulans_FGSC_A4:2537216-2538277 | WT_5hasex | WT_veg | OK     | 8,42608  | 12,0325  | 0,513999      | -0,740363     | 0,45908    | 0,719459   | no  |
| AN0765 | ChrVIII_A_nidulans_FGSC_A4:2535938-2537031 | WT_5hasex | WT_veg | NOTEST | 0,655634 | 1,60786  | 1,29418       | -0,994536     | 0,319962   | 1          | no  |
| AN0766 | ChrVIII_A_nidulans_FGSC_A4:2532772-2535188 | WT_5hasex | WT_veg | OK     | 15,8487  | 59,0998  | 1,89879       | -3,76622      | 0,00016574 | 0,0016953  | yes |
| AN0767 | ChrVIII_A_nidulans_FGSC_A4:2531006-2531530 | WT_5hasex | WT_veg | OK     | 172,988  | 296,246  | 0,776121      | -1,57836      | 0,114484   | 0,317374   | no  |
| AN0768 | ChrVIII_A_nidulans_FGSC_A4:2528841-2530434 | WT_5hasex | WT_veg | OK     | 32,5129  | 44,7108  | 0,459611      | -0,929409     | 0,352677   | 0,628135   | no  |
| AN0770 | ChrVIII_A_nidulans_FGSC_A4:2523610-2525207 | WT_5hasex | WT_veg | OK     | 51,5773  | 40,5083  | -0,34852      | 0,719088      | 0,472087   | 0,729381   | no  |
| AN0771 | ChrVIII_A_nidulans_FGSC_A4:2515423-2520708 | WT_5hasex | WT_veg | OK     | 11,3706  | 20,8758  | 0,876519      | -1,79492      | 0,0726657  | 0,231451   | no  |
| AN0773 | ChrVIII_A_nidulans_FGSC_A4:2506141-2508025 | WT_5hasex | WT_veg | OK     | 59,3733  | 50,9258  | -0,221416     | 0,461115      | 0,644716   | 0,838439   | no  |
| AN0774 | ChrVIII_A_nidulans_FGSC_A4:2504377-2505642 | WT_5hasex | WT_veg | OK     | 4,17132  | 4,05595  | -0,0404626    | 0,0526059     | 0,958046   | 0,98444    | no  |
| AN0775 | ChrVIII_A_nidulans_FGSC_A4:2502514-2503886 | WT_5hasex | WT_veg | OK     | 13,151   | 33,5134  | 1,34957       | -2,25033      | 0,0244278  | 0,103521   | no  |
| AN0776 | ChrVIII_A_nidulans_FGSC_A4:2501090-2502297 | WT_5hasex | WT_veg | OK     | 1076,24  | 1715,12  | 0,672316      | -1,20125      | 0,229652   | 0,493037   | no  |
| AN0777 | ChrVIII_A_nidulans_FGSC_A4:2498627-2500524 | WT_5hasex | WT_veg | OK     | 22,7538  | 106,396  | 2,22526       | -4,38043      | 1,1844E-05 | 0,00016671 | yes |
| AN0778 | ChrVIII_A_nidulans_FGSC_A4:2496814-2497720 | WT_5hasex | WT_veg | OK     | 3,26645  | 2,98868  | -0,128217     | 0,135812      | 0,89197    | 0,958849   | no  |
| AN0779 | ChrVIII_A_nidulans_FGSC_A4:2492619-2495902 | WT_5hasex | WT_veg | OK     | 49,8038  | 93,7068  | 0,911899      | -1,89673      | 0,0578637  | 0,196837   | no  |
| AN0780 | ChrVIII_A_nidulans_FGSC_A4:2489604-2491066 | WT_5hasex | WT_veg | OK     | 11,2677  | 9,28573  | -0,27911      | 0,452128      | 0,651177   | 0,842335   | no  |
| AN0781 | ChrVIII_A_nidulans_FGSC_A4:2484470-2487651 | WT_5hasex | WT_veg | OK     | 21,2395  | 22,256   | 0,0674412     | -0,138818     | 0,889594   | 0,958142   | no  |
| AN0782 | ChrVIII_A_nidulans_FGSC_A4:2480638-2484058 | WT_5hasex | WT_veg | OK     | 16,3915  | 33,9668  | 1,05118       | -2,1434       | 0,0320809  | 0,127811   | no  |
| AN0783 | ChrVIII_A_nidulans_FGSC_A4:2478680-2480503 | WT_5hasex | WT_veg | OK     | 4,06371  | 3,10918  | -0,386263     | 0,503302      | 0,614752   | 0,821659   | no  |
| AN0784 | ChrVIII_A_nidulans_FGSC_A4:2477405-2478318 | WT_5hasex | WT_veg | OK     | 5,08531  | 13,5737  | 1,41641       | -1,96825      | 0,0490394  | 0,175226   | no  |
| AN0786 | ChrVIII_A_nidulans_FGSC_A4:2475391-2476016 | WT_5hasex | WT_veg | OK     | 5,55038  | 1,75123  | -1,66422      | 1,15403       | 0,248487   | 0,516694   | no  |
| AN0788 | ChrVIII_A_nidulans_FGSC_A4:2471019-2472096 | WT_5hasex | WT_veg | OK     | 37,5058  | 80,8825  | 1,10871       | -2,13638      | 0,0326483  | 0,12954    | no  |
| AN0789 | ChrVIII_A_nidulans_FGSC_A4:2464383-2467949 | WT_5hasex | WT_veg | OK     | 138,44   | 647,016  | 2,22454       | -4,19245      | 2,7596E-05 | 0,00035565 | yes |
| AN0790 | ChrVIII_A_nidulans_FGSC_A4:2464383-2467949 | WT_5hasex | WT_veg | OK     | 160,517  | 690,935  | 2,10583       | -3,99463      | 6,4796E-05 | 0,00075154 | yes |
| AN0791 | ChrVIII_A_nidulans_FGSC_A4:2463540-2464148 | WT_5hasex | WT_veg | OK     | 249,44   | 2152,34  | 3,10914       | -6,24997      | 4,1052E-10 | 1,5476E-08 | yes |

## Supplementary table 1

|        |                                            |           |        |        |          |          |              |              |            |            |     |
|--------|--------------------------------------------|-----------|--------|--------|----------|----------|--------------|--------------|------------|------------|-----|
| AN0792 | ChrVIII_A_nidulans_FGSC_A4:2461130-2463322 | WT_5hasex | WT_veg | NOTEST | 1,00955  | 2,86698  | 1,50582      | -1,78773     | 0,07382    | 1          | no  |
| AN0793 | ChrVIII_A_nidulans_FGSC_A4:2459940-2460893 | WT_5hasex | WT_veg | NOTEST | 0,436991 | 1,1121   | 1,34761      | -0,850644    | 0,394967   | 1          | no  |
| AN0794 | ChrVIII_A_nidulans_FGSC_A4:2456649-2457513 | WT_5hasex | WT_veg | OK     | 21,8032  | 32,9762  | 0,596888     | -1,04425     | 0,296368   | 0,571491   | no  |
| AN0795 | ChrVIII_A_nidulans_FGSC_A4:2455860-2456379 | WT_5hasex | WT_veg | OK     | 66,8734  | 106,443  | 0,670582     | -1,23797     | 0,215728   | 0,475615   | no  |
| AN0796 | ChrVIII_A_nidulans_FGSC_A4:2454651-2455576 | WT_5hasex | WT_veg | OK     | 10,1893  | 96,4726  | 3,24306      | -5,06553     | 4,0726E-07 | 8,2334E-06 | yes |
| AN0797 | ChrVIII_A_nidulans_FGSC_A4:2451633-2454443 | WT_5hasex | WT_veg | OK     | 21,6198  | 28,1169  | 0,379086     | -0,77261     | 0,439753   | 0,704032   | no  |
| AN0798 | ChrVIII_A_nidulans_FGSC_A4:2448562-2449638 | WT_5hasex | WT_veg | OK     | 25,1667  | 82,9574  | 1,72085      | -3,05227     | 0,00227115 | 0,0155216  | yes |
| AN0799 | ChrVIII_A_nidulans_FGSC_A4:2444982-2447430 | WT_5hasex | WT_veg | NOTEST | 1,46722  | 2,74346  | 0,902913     | -0,984861    | 0,324692   | 1          | no  |
| AN0800 | ChrVIII_A_nidulans_FGSC_A4:2442251-2444654 | WT_5hasex | WT_veg | OK     | 3,46038  | 12,3972  | 1,84101      | -2,40179     | 0,0163149  | 0,0763263  | no  |
| AN0801 | ChrVIII_A_nidulans_FGSC_A4:2439502-2441565 | WT_5hasex | WT_veg | OK     | 0,964142 | 4,18892  | 2,11926      | -2,19773     | 0,0279684  | 0,114886   | no  |
| AN0802 | ChrVIII_A_nidulans_FGSC_A4:2436322-2438935 | WT_5hasex | WT_veg | OK     | 62,0272  | 124,687  | 1,00734      | -2,08739     | 0,0368532  | 0,142009   | no  |
| AN0803 | ChrVIII_A_nidulans_FGSC_A4:2432231-2435542 | WT_5hasex | WT_veg | OK     | 25,4733  | 52,4877  | 1,04299      | -2,14308     | 0,0321069  | 0,127894   | no  |
| AN0804 | ChrVIII_A_nidulans_FGSC_A4:2430425-2431749 | WT_5hasex | WT_veg | OK     | 16,6744  | 29,5061  | 0,823376     | -1,41938     | 0,155788   | 0,388468   | no  |
| AN0805 | ChrVIII_A_nidulans_FGSC_A4:2429575-2430406 | WT_5hasex | WT_veg | OK     | 5,82727  | 46,7534  | 3,00418      | -4,3028      | 1,6865E-05 | 0,00023027 | yes |
| AN0806 | ChrVIII_A_nidulans_FGSC_A4:2426977-2428958 | WT_5hasex | WT_veg | OK     | 25,3791  | 56,0546  | 1,14319      | -2,25499     | 0,0241342  | 0,102622   | no  |
| AN0808 | ChrVIII_A_nidulans_FGSC_A4:2419574-2421360 | WT_5hasex | WT_veg | OK     | 22,8668  | 38,7524  | 0,761031     | -1,4707      | 0,141372   | 0,364774   | no  |
| AN0809 | ChrVIII_A_nidulans_FGSC_A4:2413469-2418954 | WT_5hasex | WT_veg | OK     | 28,3625  | 62,9289  | 1,14974      | -2,40347     | 0,0162404  | 0,0761071  | no  |
| AN0810 | ChrVIII_A_nidulans_FGSC_A4:2408761-2412634 | WT_5hasex | WT_veg | OK     | 41,3929  | 54,6512  | 0,400868     | -0,792478    | 0,428082   | 0,694716   | no  |
| AN0811 | ChrVIII_A_nidulans_FGSC_A4:2406017-2407718 | WT_5hasex | WT_veg | OK     | 18,3174  | 17,634   | -0,0548543   | 0,0835992    | 0,933375   | 0,974936   | no  |
| AN0813 | ChrVIII_A_nidulans_FGSC_A4:2399425-2401713 | WT_5hasex | WT_veg | OK     | 36,3245  | 37,4323  | 0,0433386    | -0,0874981   | 0,930276   | 0,973566   | no  |
| AN0814 | ChrVIII_A_nidulans_FGSC_A4:2396806-2398663 | WT_5hasex | WT_veg | OK     | 48,9141  | 63,7563  | 0,382318     | -0,793858    | 0,427278   | 0,69414    | no  |
| AN0815 | ChrVIII_A_nidulans_FGSC_A4:2395679-2396581 | WT_5hasex | WT_veg | OK     | 9,80269  | 35,053   | 1,83829      | -2,79504     | 0,00518933 | 0,0306367  | yes |
| AN0816 | ChrVIII_A_nidulans_FGSC_A4:2393149-2394908 | WT_5hasex | WT_veg | OK     | 41,532   | 48,9442  | 0,236914     | -0,480411    | 0,630935   | 0,830981   | no  |
| AN0817 | ChrVIII_A_nidulans_FGSC_A4:2389614-2391701 | WT_5hasex | WT_veg | OK     | 37,0875  | 59,0133  | 0,670106     | -1,35965     | 0,173942   | 0,417328   | no  |
| AN0818 | ChrVIII_A_nidulans_FGSC_A4:2385109-2387450 | WT_5hasex | WT_veg | OK     | 19,3071  | 54,7736  | 1,50435      | -2,98376     | 0,00284733 | 0,0187068  | yes |
| AN0819 | ChrVIII_A_nidulans_FGSC_A4:2383855-2384913 | WT_5hasex | WT_veg | OK     | 386,884  | 1862,96  | 2,26762      | -4,36584     | 1,2664E-05 | 0,0001772  | yes |
| AN0820 | ChrVIII_A_nidulans_FGSC_A4:2380545-2381111 | WT_5hasex | WT_veg | OK     | 274,686  | 90,5326  | -1,60127     | 2,84166      | 0,00448795 | 0,0272859  | yes |
| AN0821 | ChrVIII_A_nidulans_FGSC_A4:2373513-2374904 | WT_5hasex | WT_veg | OK     | 22,1332  | 17,4792  | -0,340572    | 0,63727      | 0,523949   | 0,765793   | no  |
| AN0823 | ChrVIII_A_nidulans_FGSC_A4:2364825-2366631 | WT_5hasex | WT_veg | OK     | 57,8952  | 180,502  | 1,6405       | -3,29962     | 0,00096818 | 0,00763956 | yes |
| AN0825 | ChrVIII_A_nidulans_FGSC_A4:2359675-2360616 | WT_5hasex | WT_veg | OK     | 9,37605  | 14,3718  | 0,616191     | -0,926534    | 0,354168   | 0,629742   | no  |
| AN0826 | ChrVIII_A_nidulans_FGSC_A4:2356241-2357903 | WT_5hasex | WT_veg | OK     | 20,0858  | 35,6761  | 0,828783     | -1,59507     | 0,110697   | 0,310583   | no  |
| AN0827 | ChrVIII_A_nidulans_FGSC_A4:2352454-2354097 | WT_5hasex | WT_veg | OK     | 32,4916  | 45,4114  | 0,482986     | -0,965381    | 0,334354   | 0,610716   | no  |
| AN0828 | ChrVIII_A_nidulans_FGSC_A4:2349906-2352035 | WT_5hasex | WT_veg | OK     | 23,5214  | 39,1837  | 0,736279     | -1,39621     | 0,162653   | 0,399116   | no  |
| AN0830 | ChrVIII_A_nidulans_FGSC_A4:2345782-2346713 | WT_5hasex | WT_veg | OK     | 36,3654  | 89,3855  | 1,29748      | -2,31011     | 0,0208819  | 0,0921475  | no  |
| AN0831 | ChrVIII_A_nidulans_FGSC_A4:2343389-2345370 | WT_5hasex | WT_veg | OK     | 140,684  | 395,777  | 1,49223      | -2,99327     | 0,00276008 | 0,0182342  | yes |
| AN0832 | ChrVIII_A_nidulans_FGSC_A4:2340882-2342967 | WT_5hasex | WT_veg | OK     | 89,3783  | 282,733  | 1,66144      | -3,41981     | 0,00062665 | 0,00527899 | yes |
| AN0833 | ChrVIII_A_nidulans_FGSC_A4:2339132-2339915 | WT_5hasex | WT_veg | OK     | 4860     | 10330    | 1,08781      | -1,3679      | 0,171343   | 0,413137   | no  |
| AN0834 | ChrVIII_A_nidulans_FGSC_A4:2335538-2338450 | WT_5hasex | WT_veg | OK     | 50,7065  | 66,5511  | 0,392293     | -0,806852    | 0,419752   | 0,688015   | no  |
| AN0835 | ChrVIII_A_nidulans_FGSC_A4:2333666-2335066 | WT_5hasex | WT_veg | OK     | 4,37441  | 11,1168  | 1,34558      | -1,73965     | 0,0819206  | 0,251822   | no  |
| AN0836 | ChrVIII_A_nidulans_FGSC_A4:2328802-2330679 | WT_5hasex | WT_veg | OK     | 44,0774  | 28,9236  | -0,607793    | 1,24058      | 0,21476    | 0,474369   | no  |
| AN0837 | ChrVIII_A_nidulans_FGSC_A4:2323070-2328062 | WT_5hasex | WT_veg | OK     | 10,0452  | 23,1628  | 1,2053       | -2,44846     | 0,0143467  | 0,0691362  | no  |
| AN0839 | ChrVIII_A_nidulans_FGSC_A4:2310663-2312608 | WT_5hasex | WT_veg | NOTEST | 0        | 0,598972 | 1.79769e+308 | 1.79769e+308 | 0,134707   | 1          | no  |
| AN0840 | ChrVIII_A_nidulans_FGSC_A4:2308007-2310322 | WT_5hasex | WT_veg | OK     | 44,6272  | 52,7384  | 0,240928     | -0,479359    | 0,631683   | 0,831394   | no  |
| AN0841 | ChrVIII_A_nidulans_FGSC_A4:2306984-2307809 | WT_5hasex | WT_veg | OK     | 5,49587  | 13,0778  | 1,2507       | -1,33879     | 0,18064    | 0,427162   | no  |
| AN0842 | ChrVIII_A_nidulans_FGSC_A4:2299701-2305566 | WT_5hasex | WT_veg | OK     | 27,7787  | 36,6532  | 0,39996      | -0,831026    | 0,405959   | 0,676995   | no  |
| AN0843 | ChrVIII_A_nidulans_FGSC_A4:2297441-2299054 | WT_5hasex | WT_veg | OK     | 973,448  | 1505,03  | 0,628614     | -1,02859     | 0,303671   | 0,579729   | no  |
| AN0844 | ChrVIII_A_nidulans_FGSC_A4:2294739-2297209 | WT_5hasex | WT_veg | OK     | 11,9159  | 73,0898  | 2,61678      | -4,9062      | 9,286E-07  | 1,7213E-05 | yes |
| AN0845 | ChrVIII_A_nidulans_FGSC_A4:2293099-2293621 | WT_5hasex | WT_veg | NOTEST | 1,52405  | 2,92781  | 0,941916     | -0,737781    | 0,460647   | 1          | no  |
| AN0846 | ChrVIII_A_nidulans_FGSC_A4:2291911-2292724 | WT_5hasex | WT_veg | OK     | 11,4308  | 33,7127  | 1,56036      | -2,44555     | 0,0144632  | 0,069577   | no  |
| AN0847 | ChrVIII_A_nidulans_FGSC_A4:2288059-2291403 | WT_5hasex | WT_veg | OK     | 30,0602  | 23,0094  | -0,385632    | 0,774929     | 0,438381   | 0,703026   | no  |
| AN0848 | ChrVIII_A_nidulans_FGSC_A4:2285973-2287931 | WT_5hasex | WT_veg | OK     | 42,4538  | 75,8678  | 0,837595     | -1,68484     | 0,092019   | 0,273164   | no  |
| AN0849 | ChrVIII_A_nidulans_FGSC_A4:2283618-2285670 | WT_5hasex | WT_veg | OK     | 13,7126  | 28,0774  | 1,03391      | -1,94869     | 0,0513323  | 0,18077    | no  |
| AN0850 | ChrVIII_A_nidulans_FGSC_A4:2280718-2283148 | WT_5hasex | WT_veg | OK     | 48,6549  | 43,9275  | -0,14746     | 0,294869     | 0,768094   | 0,904791   | no  |

## Supplementary table 1

|        |                                            |           |        |        |          |          |               |               |            |            |     |
|--------|--------------------------------------------|-----------|--------|--------|----------|----------|---------------|---------------|------------|------------|-----|
| AN0851 | ChrVIII_A_nidulans_FGSC_A4:2279535-2280386 | WT_5hasex | WT_veg | OK     | 6,35208  | 6,87232  | 0,113568      | -0,143364     | 0,886003   | 0,956595   | no  |
| AN0852 | ChrVIII_A_nidulans_FGSC_A4:2278557-2279350 | WT_5hasex | WT_veg | OK     | 3,32299  | 1,77357  | -0,905825     | 0,73801       | 0,460508   | 0,720517   | no  |
| AN0853 | ChrVIII_A_nidulans_FGSC_A4:2275711-2277996 | WT_5hasex | WT_veg | OK     | 2,9365   | 4,9068   | 0,740685      | -1,03434      | 0,300977   | 0,576744   | no  |
| AN0854 | ChrVIII_A_nidulans_FGSC_A4:2269259-2275019 | WT_5hasex | WT_veg | OK     | 14,0751  | 24,5277  | 0,801269      | -1,58654      | 0,112616   | 0,313966   | no  |
| AN0855 | ChrVIII_A_nidulans_FGSC_A4:2265728-2268859 | WT_5hasex | WT_veg | OK     | 6,00107  | 9,10573  | 0,601556      | -1,06404      | 0,287312   | 0,561593   | no  |
| AN0856 | ChrVIII_A_nidulans_FGSC_A4:2263517-2265496 | WT_5hasex | WT_veg | OK     | 95,7591  | 130,146  | 0,44265       | -0,891547     | 0,372636   | 0,647399   | no  |
| AN0857 | ChrVIII_A_nidulans_FGSC_A4:2258463-2260208 | WT_5hasex | WT_veg | OK     | 69,3804  | 140,691  | 1,01993       | -2,09482      | 0,0361874  | 0,140186   | no  |
| AN0859 | ChrVIII_A_nidulans_FGSC_A4:2251416-2252421 | WT_5hasex | WT_veg | OK     | 61,4261  | 154,744  | 1,33296       | -2,76449      | 0,00570111 | 0,0331098  | yes |
| AN0860 | ChrVIII_A_nidulans_FGSC_A4:2247362-2249672 | WT_5hasex | WT_veg | OK     | 1088,98  | 5656,49  | 2,37693       | -2,68324      | 0,0072912  | 0,040461   | yes |
| AN0861 | ChrVIII_A_nidulans_FGSC_A4:2245918-2247283 | WT_5hasex | WT_veg | OK     | 83,5735  | 138,981  | 0,73377       | -1,5252       | 0,12721    | 0,340279   | no  |
| AN0862 | ChrVIII_A_nidulans_FGSC_A4:2244670-2245297 | WT_5hasex | WT_veg | OK     | 55,0426  | 142,413  | 1,37146       | -2,5006       | 0,0123983  | 0,0617231  | no  |
| AN0863 | ChrVIII_A_nidulans_FGSC_A4:2241821-2244378 | WT_5hasex | WT_veg | OK     | 12,4153  | 17,7596  | 0,516475      | -0,97299      | 0,330558   | 0,606908   | no  |
| AN0864 | ChrVIII_A_nidulans_FGSC_A4:2235408-2236145 | WT_5hasex | WT_veg | OK     | 37,196   | 47,5554  | 0,354461      | -0,628422     | 0,529727   | 0,769303   | no  |
| AN0865 | ChrVIII_A_nidulans_FGSC_A4:2233719-2235120 | WT_5hasex | WT_veg | OK     | 34,6673  | 36,5244  | 0,0752848     | -0,148418     | 0,882013   | 0,95519    | no  |
| AN0866 | ChrVIII_A_nidulans_FGSC_A4:2229876-2232313 | WT_5hasex | WT_veg | OK     | 14,3826  | 39,7709  | 1,46738       | -2,79223      | 0,00523456 | 0,0308586  | yes |
| AN0867 | ChrVIII_A_nidulans_FGSC_A4:2224009-2225509 | WT_5hasex | WT_veg | OK     | 188,535  | 164,423  | -0,197414     | 0,390753      | 0,69598    | 0,867071   | no  |
| AN0868 | ChrVIII_A_nidulans_FGSC_A4:2222223-2223484 | WT_5hasex | WT_veg | OK     | 18,759   | 26,821   | 0,515783      | -0,918943     | 0,358125   | 0,633149   | no  |
| AN0869 | ChrVIII_A_nidulans_FGSC_A4:2220827-2221636 | WT_5hasex | WT_veg | OK     | 16,8134  | 34,2218  | 1,02531       | -1,59587      | 0,110517   | 0,310226   | no  |
| AN0870 | ChrVIII_A_nidulans_FGSC_A4:2217248-2218676 | WT_5hasex | WT_veg | OK     | 1033,52  | 2470,89  | 1,25747       | -2,05438      | 0,0399391  | 0,150676   | no  |
| AN0871 | ChrVIII_A_nidulans_FGSC_A4:2213476-2214744 | WT_5hasex | WT_veg | OK     | 63,5267  | 180,566  | 1,50709       | -3,14551      | 0,00165799 | 0,0119376  | yes |
| AN0872 | ChrVIII_A_nidulans_FGSC_A4:2210121-2212874 | WT_5hasex | WT_veg | OK     | 15,6022  | 21,6204  | 0,470649      | -0,932404     | 0,351128   | 0,626781   | no  |
| AN0873 | ChrVIII_A_nidulans_FGSC_A4:2208155-2209752 | WT_5hasex | WT_veg | OK     | 3,34621  | 8,00718  | 1,25877       | -1,67209      | 0,0945074  | 0,278286   | no  |
| AN0874 | ChrVIII_A_nidulans_FGSC_A4:2205002-2207322 | WT_5hasex | WT_veg | OK     | 33,6262  | 74,6288  | 1,15015       | -2,35164      | 0,0186907  | 0,0844993  | no  |
| AN0875 | ChrVIII_A_nidulans_FGSC_A4:2203179-2204517 | WT_5hasex | WT_veg | OK     | 46,5824  | 100,949  | 1,11576       | -2,22203      | 0,0262811  | 0,109613   | no  |
| AN0876 | ChrVIII_A_nidulans_FGSC_A4:2200978-2201988 | WT_5hasex | WT_veg | OK     | 33,8938  | 83,909   | 1,3078        | -2,50627      | 0,0122012  | 0,0609583  | no  |
| AN0879 | ChrVIII_A_nidulans_FGSC_A4:2187432-2188271 | WT_5hasex | WT_veg | OK     | 115,487  | 223,301  | 0,951264      | -1,95979      | 0,0500199  | 0,177608   | no  |
| AN0881 | ChrVIII_A_nidulans_FGSC_A4:2184320-2185667 | WT_5hasex | WT_veg | OK     | 12,112   | 29,8521  | 1,3014        | -2,25498      | 0,0241349  | 0,102622   | no  |
| AN0882 | ChrVIII_A_nidulans_FGSC_A4:2183420-2184303 | WT_5hasex | WT_veg | OK     | 9,41579  | 9,29522  | -0,0185928    | 0,0233133     | 0,9814     | 0,993422   | no  |
| AN0883 | ChrVIII_A_nidulans_FGSC_A4:2181998-2183143 | WT_5hasex | WT_veg | OK     | 13,8733  | 15,8958  | 0,196338      | -0,324973     | 0,745201   | 0,892858   | no  |
| AN0884 | ChrVIII_A_nidulans_FGSC_A4:2179091-2180296 | WT_5hasex | WT_veg | OK     | 464,167  | 658,914  | 0,505447      | -0,826253     | 0,408661   | 0,678666   | no  |
| AN0885 | ChrVIII_A_nidulans_FGSC_A4:2176012-2178624 | WT_5hasex | WT_veg | OK     | 101,304  | 190,436  | 0,910613      | -1,72752      | 0,0840738  | 0,256724   | no  |
| AN0888 | ChrVIII_A_nidulans_FGSC_A4:2167484-2169191 | WT_5hasex | WT_veg | OK     | 15,1835  | 21,6005  | 0,50856       | -0,948815     | 0,342714   | 0,618144   | no  |
| AN0889 | ChrVIII_A_nidulans_FGSC_A4:2165463-2167161 | WT_5hasex | WT_veg | OK     | 38,9025  | 86,7416  | 1,15686       | -2,36041      | 0,0182548  | 0,0830229  | no  |
| AN0890 | ChrVIII_A_nidulans_FGSC_A4:2153216-2155721 | WT_5hasex | WT_veg | OK     | 18,8055  | 32,6511  | 0,795975      | -1,55206      | 0,120648   | 0,328725   | no  |
| AN0892 | ChrVIII_A_nidulans_FGSC_A4:2144777-2147409 | WT_5hasex | WT_veg | OK     | 23,1252  | 48,9305  | 1,08127       | -2,14993      | 0,031561   | 0,126249   | no  |
| AN0894 | ChrVIII_A_nidulans_FGSC_A4:2139637-2142035 | WT_5hasex | WT_veg | OK     | 29,9809  | 199,249  | 2,73246       | -5,53323      | 3,1438E-08 | 8,1758E-07 | yes |
| AN0895 | ChrVIII_A_nidulans_FGSC_A4:2137303-2138563 | WT_5hasex | WT_veg | OK     | 205,759  | 403,162  | 0,970405      | -1,79927      | 0,0719767  | 0,229997   | no  |
| AN0896 | ChrVIII_A_nidulans_FGSC_A4:2136041-2137075 | WT_5hasex | WT_veg | OK     | 231,933  | 543,674  | 1,22903       | -2,53432      | 0,0112665  | 0,0572303  | no  |
| AN0897 | ChrVIII_A_nidulans_FGSC_A4:2134980-2135974 | WT_5hasex | WT_veg | OK     | 61,7015  | 95,1147  | 0,624363      | -1,26218      | 0,206883   | 0,46385    | no  |
| AN0898 | ChrVIII_A_nidulans_FGSC_A4:2132226-2134170 | WT_5hasex | WT_veg | OK     | 112,628  | 291,2    | 1,37045       | -2,8474       | 0,00440774 | 0,0268981  | yes |
| AN0899 | ChrVIII_A_nidulans_FGSC_A4:2127789-2130477 | WT_5hasex | WT_veg | NOTEST | 0,362023 | 0,335166 | -0,111206     | 0,0717025     | 0,942839   | 1          | no  |
| AN0900 | ChrVIII_A_nidulans_FGSC_A4:2125552-2126340 | WT_5hasex | WT_veg | NOTEST | 0,869432 | 0        | -1.79769e+308 | -1.79769e+308 | 0,107729   | 1          | no  |
| AN0902 | ChrVIII_A_nidulans_FGSC_A4:2119588-2121512 | WT_5hasex | WT_veg | OK     | 9,08086  | 9,85711  | 0,118336      | -0,195073     | 0,845336   | 0,938979   | no  |
| AN0903 | ChrVIII_A_nidulans_FGSC_A4:2117853-2118801 | WT_5hasex | WT_veg | OK     | 27,8438  | 67,7628  | 1,28314       | -2,19141      | 0,0284222  | 0,11624    | no  |
| AN0904 | ChrVIII_A_nidulans_FGSC_A4:2114218-2116225 | WT_5hasex | WT_veg | OK     | 33,5759  | 80,167   | 1,25558       | -2,11646      | 0,034306   | 0,134684   | no  |
| AN0905 | ChrVIII_A_nidulans_FGSC_A4:2111146-2113797 | WT_5hasex | WT_veg | OK     | 12,4009  | 20,2133  | 0,704861      | -1,3533       | 0,175959   | 0,420323   | no  |
| AN0907 | ChrVIII_A_nidulans_FGSC_A4:2104838-2106116 | WT_5hasex | WT_veg | OK     | 709,63   | 1165,34  | 0,715612      | -1,27816      | 0,201193   | 0,456264   | no  |
| AN0908 | ChrVIII_A_nidulans_FGSC_A4:2103451-2104629 | WT_5hasex | WT_veg | OK     | 8,61514  | 11,1256  | 0,368938      | -0,551321     | 0,581414   | 0,801959   | no  |
| AN0909 | ChrVIII_A_nidulans_FGSC_A4:2101394-2103395 | WT_5hasex | WT_veg | OK     | 20,1779  | 18,5318  | -0,122774     | 0,239507      | 0,810713   | 0,924154   | no  |
| AN0910 | ChrVIII_A_nidulans_FGSC_A4:2099287-2101027 | WT_5hasex | WT_veg | OK     | 51,5587  | 73,0555  | 0,502776      | -1,03756      | 0,299477   | 0,57499    | no  |
| AN0911 | ChrVIII_A_nidulans_FGSC_A4:2097448-2098941 | WT_5hasex | WT_veg | OK     | 13,4489  | 14,6873  | 0,127072      | -0,221522     | 0,824686   | 0,930079   | no  |
| AN0912 | ChrVIII_A_nidulans_FGSC_A4:2095643-2097234 | WT_5hasex | WT_veg | OK     | 102,003  | 80,8047  | -0,336105     | 0,66267       | 0,507542   | 0,754674   | no  |
| AN0913 | ChrVIII_A_nidulans_FGSC_A4:2093963-2095009 | WT_5hasex | WT_veg | OK     | 210,73   | 223,821  | 0,0869523     | -0,150597     | 0,880293   | 0,95456    | no  |

## Supplementary table 1

|        |                                            |           |        |        |          |          |               |               |            |            |     |
|--------|--------------------------------------------|-----------|--------|--------|----------|----------|---------------|---------------|------------|------------|-----|
| AN0914 | ChrVIII_A_nidulans_FGSC_A4:2091147-2092969 | WT_5hasex | WT_veg | OK     | 25,4251  | 37,6868  | 0,567805      | -1,12394      | 0,261039   | 0,531531   | no  |
| AN0915 | ChrVIII_A_nidulans_FGSC_A4:2087604-2088057 | WT_5hasex | WT_veg | NOTEST | 0        | 0,422766 | 1.79769e+308  | 1.79769e+308  | 0,309884   | 1          | no  |
| AN0916 | ChrVIII_A_nidulans_FGSC_A4:2083585-2085190 | WT_5hasex | WT_veg | NOTEST | 0,282807 | 1,0919   | 1,94895       | -1,27498      | 0,202317   | 1          | no  |
| AN0917 | ChrVIII_A_nidulans_FGSC_A4:2079810-2082205 | WT_5hasex | WT_veg | OK     | 45,2328  | 72,6699  | 0,683986      | -1,41021      | 0,158479   | 0,393201   | no  |
| AN0918 | ChrVIII_A_nidulans_FGSC_A4:2077847-2079372 | WT_5hasex | WT_veg | OK     | 297,036  | 327,966  | 0,142907      | -0,270382     | 0,786867   | 0,912998   | no  |
| AN0919 | ChrVIII_A_nidulans_FGSC_A4:2075143-2076520 | WT_5hasex | WT_veg | OK     | 112,214  | 69,0923  | -0,699653     | 1,43203       | 0,152136   | 0,382674   | no  |
| AN0920 | ChrVIII_A_nidulans_FGSC_A4:2072111-2073771 | WT_5hasex | WT_veg | OK     | 15,8518  | 22,7525  | 0,521379      | -0,968687     | 0,332701   | 0,609059   | no  |
| AN0921 | ChrVIII_A_nidulans_FGSC_A4:2070556-2071626 | WT_5hasex | WT_veg | NOTEST | 1,30566  | 0,771188 | -0,759623     | 0,492765      | 0,622179   | 1          | no  |
| AN0922 | ChrVIII_A_nidulans_FGSC_A4:2067860-2069582 | WT_5hasex | WT_veg | OK     | 65,0999  | 104,31   | 0,680155      | -1,40339      | 0,1605     | 0,396068   | no  |
| AN0923 | ChrVIII_A_nidulans_FGSC_A4:2064957-2067447 | WT_5hasex | WT_veg | OK     | 28,3375  | 54,1308  | 0,933738      | -1,8998       | 0,0574595  | 0,195888   | no  |
| AN0924 | ChrVIII_A_nidulans_FGSC_A4:2061393-2063031 | WT_5hasex | WT_veg | OK     | 45,9488  | 89,5705  | 0,962996      | -1,89397      | 0,0582285  | 0,197815   | no  |
| AN0925 | ChrVIII_A_nidulans_FGSC_A4:2057542-2060685 | WT_5hasex | WT_veg | OK     | 24,7956  | 35,389   | 0,513219      | -1,04549      | 0,295799   | 0,570734   | no  |
| AN0926 | ChrVIII_A_nidulans_FGSC_A4:2053676-2056857 | WT_5hasex | WT_veg | OK     | 15,2928  | 42,3984  | 1,47115       | -2,94963      | 0,0031815  | 0,0205291  | yes |
| AN0927 | ChrVIII_A_nidulans_FGSC_A4:2051933-2053007 | WT_5hasex | WT_veg | OK     | 74,5585  | 104,567  | 0,487987      | -0,997078     | 0,318726   | 0,549766   | no  |
| AN0928 | ChrVIII_A_nidulans_FGSC_A4:2048836-2050659 | WT_5hasex | WT_veg | OK     | 21,584   | 10,0685  | -1,10012      | 2,07305       | 0,0381677  | 0,145671   | no  |
| AN0929 | ChrVIII_A_nidulans_FGSC_A4:2039125-2042051 | WT_5hasex | WT_veg | OK     | 76,1217  | 174,37   | 1,19577       | -2,47111      | 0,0134695  | 0,0658274  | no  |
| AN0930 | ChrVIII_A_nidulans_FGSC_A4:2035850-2037872 | WT_5hasex | WT_veg | OK     | 110,838  | 715,684  | 2,69087       | -5,14166      | 2,7232E-07 | 5,7472E-06 | yes |
| AN0934 | ChrVIII_A_nidulans_FGSC_A4:2022192-2023506 | WT_5hasex | WT_veg | OK     | 11,2443  | 9,71635  | -0,210713     | 0,312215      | 0,754877   | 0,898274   | no  |
| AN0935 | ChrVIII_A_nidulans_FGSC_A4:2019733-2020577 | WT_5hasex | WT_veg | OK     | 44,8971  | 28,5534  | -0,652959     | 1,15696       | 0,247289   | 0,515451   | no  |
| AN0936 | ChrVIII_A_nidulans_FGSC_A4:2017683-2019267 | WT_5hasex | WT_veg | OK     | 32,9982  | 37,002   | 0,165218      | -0,332248     | 0,739702   | 0,890709   | no  |
| AN0937 | ChrVIII_A_nidulans_FGSC_A4:2014392-2017161 | WT_5hasex | WT_veg | OK     | 7,71667  | 13,2462  | 0,779527      | -1,34898      | 0,177345   | 0,422353   | no  |
| AN0938 | ChrVIII_A_nidulans_FGSC_A4:2011890-2014333 | WT_5hasex | WT_veg | OK     | 15,7668  | 71,9651  | 2,19041       | -3,95471      | 7,6628E-05 | 0,00086971 | yes |
| AN0939 | ChrVIII_A_nidulans_FGSC_A4:2010938-2011688 | WT_5hasex | WT_veg | OK     | 18,3579  | 111,157  | 2,59813       | -4,27583      | 1,9043E-05 | 0,00025541 | yes |
| AN0940 | ChrVIII_A_nidulans_FGSC_A4:2010377-2010849 | WT_5hasex | WT_veg | OK     | 14,4395  | 48,7276  | 1,75472       | -2,20056      | 0,0277669  | 0,114201   | no  |
| AN0944 | ChrVIII_A_nidulans_FGSC_A4:1998304-2000533 | WT_5hasex | WT_veg | OK     | 9,63239  | 38,7354  | 2,00769       | -3,59708      | 0,00032181 | 0,00298887 | yes |
| AN0946 | ChrVIII_A_nidulans_FGSC_A4:1992044-1994369 | WT_5hasex | WT_veg | OK     | 15,5568  | 139,771  | 3,16744       | -5,94709      | 2,7295E-09 | 8,8291E-08 | yes |
| AN0948 | ChrVIII_A_nidulans_FGSC_A4:1982294-1985047 | WT_5hasex | WT_veg | OK     | 12,8694  | 162,573  | 3,65907       | -6,69066      | 2,2217E-11 | 9,9588E-10 | yes |
| AN0949 | ChrVIII_A_nidulans_FGSC_A4:1980097-1981141 | WT_5hasex | WT_veg | OK     | 4,80166  | 11,1118  | 1,21049       | -1,47906      | 0,139123   | 0,361087   | no  |
| AN0950 | ChrVIII_A_nidulans_FGSC_A4:1978777-1979508 | WT_5hasex | WT_veg | OK     | 120,251  | 18,6545  | -2,68845      | 5,06302       | 4,1267E-07 | 8,3299E-06 | yes |
| AN0952 | ChrVIII_A_nidulans_FGSC_A4:1962952-1965250 | WT_5hasex | WT_veg | OK     | 100,177  | 244,38   | 1,28657       | -2,62996      | 0,00853959 | 0,0459581  | yes |
| AN0953 | ChrVIII_A_nidulans_FGSC_A4:1960238-1962209 | WT_5hasex | WT_veg | OK     | 67,5278  | 50,609   | -0,416088     | 0,842945      | 0,399259   | 0,671623   | no  |
| AN0954 | ChrVIII_A_nidulans_FGSC_A4:1958105-1959150 | WT_5hasex | WT_veg | OK     | 21,5106  | 23,3575  | 0,118841      | -0,209518     | 0,834044   | 0,93403    | no  |
| AN0956 | ChrVIII_A_nidulans_FGSC_A4:1953253-1955139 | WT_5hasex | WT_veg | OK     | 7,47898  | 33,9955  | 2,18443       | -3,62424      | 0,00028981 | 0,00273979 | yes |
| AN0958 | ChrVIII_A_nidulans_FGSC_A4:1949823-1950423 | WT_5hasex | WT_veg | OK     | 2,77384  | 4,36657  | 0,654612      | -0,667997     | 0,504136   | 0,752446   | no  |
| AN0959 | ChrVIII_A_nidulans_FGSC_A4:1949299-1949755 | WT_5hasex | WT_veg | OK     | 1,87064  | 2,43555  | 0,380714      | -0,28546      | 0,775292   | 0,90816    | no  |
| AN0960 | ChrVIII_A_nidulans_FGSC_A4:1946891-1948017 | WT_5hasex | WT_veg | OK     | 11,5904  | 23,542   | 1,02231       | -1,65105      | 0,0987291  | 0,286705   | no  |
| AN0963 | ChrVIII_A_nidulans_FGSC_A4:1943414-1944806 | WT_5hasex | WT_veg | OK     | 16,6168  | 12,6997  | -0,387849     | 0,681266      | 0,495703   | 0,746583   | no  |
| AN0964 | ChrVIII_A_nidulans_FGSC_A4:1941664-1942477 | WT_5hasex | WT_veg | OK     | 147,296  | 451,984  | 1,61755       | -2,60825      | 0,00910075 | 0,0483473  | yes |
| AN0965 | ChrVIII_A_nidulans_FGSC_A4:1939327-1939693 | WT_5hasex | WT_veg | OK     | 13,441   | 22,4729  | 0,741547      | -1,01092      | 0,312056   | 0,588447   | no  |
| AN0966 | ChrVIII_A_nidulans_FGSC_A4:1938535-1939306 | WT_5hasex | WT_veg | OK     | 14,7766  | 28,8185  | 0,963682      | -1,57575      | 0,115083   | 0,31842    | no  |
| AN0969 | ChrVIII_A_nidulans_FGSC_A4:1935822-1936317 | WT_5hasex | WT_veg | OK     | 16,0882  | 28,889   | 0,844523      | -1,24817      | 0,211968   | 0,470867   | no  |
| AN0970 | ChrVIII_A_nidulans_FGSC_A4:1933362-1934790 | WT_5hasex | WT_veg | OK     | 3,27113  | 4,84724  | 0,567373      | -0,765613     | 0,443907   | 0,707555   | no  |
| AN0971 | ChrVIII_A_nidulans_FGSC_A4:1929981-1930356 | WT_5hasex | WT_veg | NOTEST | 0        | 0        | 0             | 0             | 1          | 1          | no  |
| AN0972 | ChrVIII_A_nidulans_FGSC_A4:1929397-1929601 | WT_5hasex | WT_veg | NOTEST | 1,21456  | 0        | -1.79769e+308 | -1.79769e+308 | 0,165569   | 1          | no  |
| AN0974 | ChrVIII_A_nidulans_FGSC_A4:1923863-1923989 | WT_5hasex | WT_veg | OK     | 3,23892  | 0        | -1.79769e+308 | -1.79769e+308 | 0,224063   | 0,486043   | no  |
| AN0975 | ChrVIII_A_nidulans_FGSC_A4:1919352-1920885 | WT_5hasex | WT_veg | OK     | 11,7708  | 17,8548  | 0,601102      | -1,03115      | 0,302473   | 0,578262   | no  |
| AN0977 | ChrVIII_A_nidulans_FGSC_A4:1909097-1910429 | WT_5hasex | WT_veg | OK     | 100,442  | 166,569  | 0,729748      | -1,48501      | 0,137542   | 0,358397   | no  |
| AN0978 | ChrVIII_A_nidulans_FGSC_A4:1906719-1908523 | WT_5hasex | WT_veg | OK     | 27,0597  | 41,0073  | 0,599738      | -1,19879      | 0,23061    | 0,494472   | no  |
| AN0979 | ChrVIII_A_nidulans_FGSC_A4:1898899-1901274 | WT_5hasex | WT_veg | OK     | 49,9807  | 71,0175  | 0,506802      | -1,04734      | 0,294942   | 0,569743   | no  |
| AN0981 | ChrVIII_A_nidulans_FGSC_A4:1891076-1892734 | WT_5hasex | WT_veg | OK     | 99,2306  | 469,667  | 2,24278       | -4,43358      | 9,2681E-06 | 0,0001345  | yes |
| AN0982 | ChrVIII_A_nidulans_FGSC_A4:1888899-1890229 | WT_5hasex | WT_veg | OK     | 49,5144  | 109,247  | 1,14167       | -2,36179      | 0,0181869  | 0,0827641  | no  |
| AN0983 | ChrVIII_A_nidulans_FGSC_A4:1886309-1887376 | WT_5hasex | WT_veg | OK     | 24,457   | 43,8929  | 0,843737      | -1,56983      | 0,116455   | 0,320898   | no  |
| AN0984 | ChrVIII_A_nidulans_FGSC_A4:1883786-1886076 | WT_5hasex | WT_veg | OK     | 14,9032  | 20,0567  | 0,428462      | -0,824717     | 0,409533   | 0,679533   | no  |

## Supplementary table 1

|         |                                            |           |        |        |          |          |               |               |            |            |     |
|---------|--------------------------------------------|-----------|--------|--------|----------|----------|---------------|---------------|------------|------------|-----|
| AN0985  | ChrVIII_A_nidulans_FGSC_A4:1881744-1883110 | WT_5hasex | WT_veg | OK     | 8,92016  | 17,5978  | 0,980253      | -1,54322      | 0,122778   | 0,332542   | no  |
| AN0986  | ChrVIII_A_nidulans_FGSC_A4:1876425-1878726 | WT_5hasex | WT_veg | OK     | 25,303   | 62,6097  | 1,30708       | -2,52386      | 0,0116073  | 0,058609   | no  |
| AN0987  | ChrVIII_A_nidulans_FGSC_A4:1874962-1875778 | WT_5hasex | WT_veg | OK     | 35,8991  | 89,1929  | 1,31298       | -2,39386      | 0,0166722  | 0,07671    | no  |
| AN0988  | ChrVIII_A_nidulans_FGSC_A4:1871865-1874363 | WT_5hasex | WT_veg | OK     | 47,3763  | 224,677  | 2,24561       | -4,63475      | 3,5736E-06 | 5,7373E-05 | yes |
| AN0989  | ChrVIII_A_nidulans_FGSC_A4:1868244-1870010 | WT_5hasex | WT_veg | OK     | 28,9966  | 66,0673  | 1,18805       | -2,37657      | 0,0174743  | 0,0803521  | no  |
| AN0990  | ChrVIII_A_nidulans_FGSC_A4:1864384-1867565 | WT_5hasex | WT_veg | OK     | 59,0564  | 64,8279  | 0,134523      | -0,277037     | 0,781752   | 0,910949   | no  |
| AN0991  | ChrVIII_A_nidulans_FGSC_A4:1862714-1864276 | WT_5hasex | WT_veg | OK     | 39,3013  | 51,19    | 0,381285      | -0,709223     | 0,478186   | 0,733638   | no  |
| AN0992  | ChrVIII_A_nidulans_FGSC_A4:1860568-1861707 | WT_5hasex | WT_veg | OK     | 18,8669  | 16,7107  | -0,175084     | 0,305623      | 0,759892   | 0,900677   | no  |
| AN0993  | ChrVIII_A_nidulans_FGSC_A4:1857990-1859988 | WT_5hasex | WT_veg | OK     | 7,92635  | 18,4081  | 1,21561       | -2,00803      | 0,0446404  | 0,163618   | no  |
| AN0995  | ChrVIII_A_nidulans_FGSC_A4:1849249-1853397 | WT_5hasex | WT_veg | OK     | 8,6295   | 20,3091  | 1,23478       | -2,38716      | 0,0169792  | 0,0786967  | no  |
| AN0996  | ChrVIII_A_nidulans_FGSC_A4:1847313-1848272 | WT_5hasex | WT_veg | OK     | 34,5448  | 49,4078  | 0,516271      | -0,966904     | 0,333592   | 0,609962   | no  |
| AN0997  | ChrVIII_A_nidulans_FGSC_A4:1845534-1846989 | WT_5hasex | WT_veg | OK     | 58,1774  | 158,935  | 1,44991       | -2,9544       | 0,00313278 | 0,0202698  | yes |
| AN0998  | ChrVIII_A_nidulans_FGSC_A4:1843499-1845385 | WT_5hasex | WT_veg | OK     | 33,0732  | 76,8313  | 1,21603       | -2,38349      | 0,0171494  | 0,0792753  | no  |
| AN1000  | ChrVIII_A_nidulans_FGSC_A4:1840304-1841120 | WT_5hasex | WT_veg | OK     | 13,1693  | 45,5413  | 1,79          | -2,8997       | 0,0037352  | 0,0234634  | yes |
| AN10000 | ChrVIII_A_nidulans_FGSC_A4:4931593-4933939 | WT_5hasex | WT_veg | NOTEST | 1,23906  | 2,48607  | 1,00462       | -1,2917       | 0,196462   | 1          | no  |
| AN10001 | ChrVIII_A_nidulans_FGSC_A4:4924672-4930697 | WT_5hasex | WT_veg | NOTEST | 0,761857 | 1,38422  | 0,861484      | -1,1723       | 0,241077   | 1          | no  |
| AN10003 | ChrVIII_A_nidulans_FGSC_A4:4759700-4762130 | WT_5hasex | WT_veg | OK     | 67,9267  | 132,216  | 0,960849      | -1,98976      | 0,0466171  | 0,169029   | no  |
| AN10004 | ChrVIII_A_nidulans_FGSC_A4:4906762-4907086 | WT_5hasex | WT_veg | NOTEST | 0        | 0        | 0             | 0             | 1          | 1          | no  |
| AN10005 | ChrVIII_A_nidulans_FGSC_A4:4833317-4834255 | WT_5hasex | WT_veg | OK     | 11,0995  | 13,9337  | 0,32809       | -0,500877     | 0,616457   | 0,822546   | no  |
| AN10006 | ChrVIII_A_nidulans_FGSC_A4:4774729-4775526 | WT_5hasex | WT_veg | OK     | 43,1699  | 50,3004  | 0,220544      | -0,418793     | 0,675368   | 0,856562   | no  |
| AN10007 | ChrVIII_A_nidulans_FGSC_A4:4758618-4759266 | WT_5hasex | WT_veg | OK     | 275,359  | 220,95   | -0,317594     | 0,651155      | 0,514946   | 0,759584   | no  |
| AN10008 | ChrVIII_A_nidulans_FGSC_A4:4796917-4799954 | WT_5hasex | WT_veg | OK     | 32,9542  | 43,1934  | 0,39035       | -0,795187     | 0,426505   | 0,693628   | no  |
| AN10009 | ChrVIII_A_nidulans_FGSC_A4:4887446-4887711 | WT_5hasex | WT_veg | NOTEST | 0        | 0        | 0             | 0             | 1          | 1          | no  |
| AN1001  | ChrVIII_A_nidulans_FGSC_A4:1836787-1838997 | WT_5hasex | WT_veg | OK     | 225,515  | 109,959  | -1,03626      | 2,01741       | 0,0436531  | 0,160832   | no  |
| AN10010 | ChrVIII_A_nidulans_FGSC_A4:4720105-4722760 | WT_5hasex | WT_veg | OK     | 48,9568  | 83,1349  | 0,763945      | -1,59347      | 0,111055   | 0,311221   | no  |
| AN10011 | ChrVIII_A_nidulans_FGSC_A4:4678359-4679900 | WT_5hasex | WT_veg | OK     | 10,5961  | 31,3676  | 1,56575       | -2,54736      | 0,0108541  | 0,0555936  | no  |
| AN10012 | ChrVIII_A_nidulans_FGSC_A4:4722872-4724255 | WT_5hasex | WT_veg | OK     | 74,2467  | 154,694  | 1,05902       | -2,19939      | 0,0278501  | 0,114472   | no  |
| AN10013 | ChrVIII_A_nidulans_FGSC_A4:4676318-4677833 | WT_5hasex | WT_veg | OK     | 14,288   | 38,381   | 1,42559       | -2,54682      | 0,010871   | 0,0556312  | no  |
| AN10014 | ChrVIII_A_nidulans_FGSC_A4:4730247-4730955 | WT_5hasex | WT_veg | OK     | 14,6057  | 68,3149  | 2,22567       | -3,46063      | 0,00053892 | 0,00463794 | yes |
| AN10016 | ChrVIII_A_nidulans_FGSC_A4:4519200-4521295 | WT_5hasex | WT_veg | OK     | 11,3718  | 15,9785  | 0,490679      | -0,854976     | 0,392564   | 0,665863   | no  |
| AN10017 | ChrVIII_A_nidulans_FGSC_A4:4562703-4566212 | WT_5hasex | WT_veg | OK     | 19,4047  | 26,2143  | 0,433948      | -0,87902      | 0,37939    | 0,654002   | no  |
| AN10018 | ChrVIII_A_nidulans_FGSC_A4:4560910-4562108 | WT_5hasex | WT_veg | OK     | 22,1274  | 22,2307  | 0,00671713    | -0,0119989    | 0,990427   | 0,996488   | no  |
| AN10019 | ChrVIII_A_nidulans_FGSC_A4:4557093-4560757 | WT_5hasex | WT_veg | OK     | 34,6593  | 91,6505  | 1,4029        | -2,96119      | 0,00306452 | 0,0198894  | yes |
| AN1002  | ChrVIII_A_nidulans_FGSC_A4:1833042-1836213 | WT_5hasex | WT_veg | OK     | 25,1175  | 32,1374  | 0,355558      | -0,730919     | 0,464829   | 0,723905   | no  |
| AN10020 | ChrVIII_A_nidulans_FGSC_A4:4521697-4524783 | WT_5hasex | WT_veg | OK     | 97,5419  | 131,803  | 0,434289      | -0,875488     | 0,381308   | 0,655619   | no  |
| AN10024 | ChrVIII_A_nidulans_FGSC_A4:4425847-4427318 | WT_5hasex | WT_veg | OK     | 2,96134  | 14,261   | 2,26776       | -3,21585      | 0,0013006  | 0,00975583 | yes |
| AN10025 | ChrVIII_A_nidulans_FGSC_A4:4369686-4370756 | WT_5hasex | WT_veg | OK     | 6,24255  | 49,5521  | 2,98874       | -4,54851      | 5,4028E-06 | 8,2928E-05 | yes |
| AN10026 | ChrVIII_A_nidulans_FGSC_A4:4335850-4336983 | WT_5hasex | WT_veg | OK     | 2,98365  | 6,91301  | 1,21223       | -1,49826      | 0,134064   | 0,352691   | no  |
| AN10029 | ChrVIII_A_nidulans_FGSC_A4:4193862-4196902 | WT_5hasex | WT_veg | OK     | 29,4213  | 42,5255  | 0,531465      | -1,09354      | 0,274159   | 0,546898   | no  |
| AN1003  | ChrVIII_A_nidulans_FGSC_A4:1830960-1832716 | WT_5hasex | WT_veg | OK     | 339,227  | 613,25   | 0,854222      | -1,64133      | 0,10073    | 0,290968   | no  |
| AN10030 | ChrVIII_A_nidulans_FGSC_A4:4185367-4187193 | WT_5hasex | WT_veg | OK     | 1545,81  | 1654,04  | 0,0976292     | -0,150521     | 0,880354   | 0,954594   | no  |
| AN10031 | ChrVIII_A_nidulans_FGSC_A4:4093005-4094318 | WT_5hasex | WT_veg | OK     | 193,852  | 675,843  | 1,80173       | -3,63004      | 0,00028338 | 0,00268835 | yes |
| AN10032 | ChrVIII_A_nidulans_FGSC_A4:4070455-4071442 | WT_5hasex | WT_veg | OK     | 478,217  | 754,457  | 0,657775      | -1,3203       | 0,186736   | 0,435951   | no  |
| AN10033 | ChrVIII_A_nidulans_FGSC_A4:4368101-4369374 | WT_5hasex | WT_veg | OK     | 191,541  | 320,596  | 0,743102      | -1,53077      | 0,125826   | 0,337782   | no  |
| AN10034 | ChrVIII_A_nidulans_FGSC_A4:4312450-4313104 | WT_5hasex | WT_veg | OK     | 76,3736  | 485,23   | 2,66752       | -5,31762      | 1,0514E-07 | 2,4345E-06 | yes |
| AN10036 | ChrVIII_A_nidulans_FGSC_A4:4427874-4429767 | WT_5hasex | WT_veg | OK     | 9,49055  | 10,6382  | 0,16469       | -0,268812     | 0,788074   | 0,913502   | no  |
| AN10037 | ChrVIII_A_nidulans_FGSC_A4:4430502-4431056 | WT_5hasex | WT_veg | OK     | 125,019  | 296,576  | 1,24626       | -2,47907      | 0,0131724  | 0,0647281  | no  |
| AN10039 | ChrVIII_A_nidulans_FGSC_A4:4460858-4462628 | WT_5hasex | WT_veg | OK     | 3,54792  | 88,0903  | 4,63394       | -6,84799      | 7,4893E-12 | 3,661E-10  | yes |
| AN1004  | ChrVIII_A_nidulans_FGSC_A4:1829733-1830764 | WT_5hasex | WT_veg | OK     | 21,1711  | 34,6859  | 0,712255      | -1,23932      | 0,215228   | 0,47502    | no  |
| AN10040 | ChrVIII_A_nidulans_FGSC_A4:4187882-4188837 | WT_5hasex | WT_veg | OK     | 12,2805  | 0,206453 | -5,89441      | 1,9787        | 0,0478492  | 0,172346   | no  |
| AN10041 | ChrVIII_A_nidulans_FGSC_A4:4244422-4245590 | WT_5hasex | WT_veg | NOTEST | 0,446419 | 0        | -1.79769e+308 | -1.79769e+308 | 0,107729   | 1          | no  |
| AN10042 | ChrVIII_A_nidulans_FGSC_A4:4254326-4255150 | WT_5hasex | WT_veg | OK     | 11,523   | 6,8514   | -0,750041     | 0,912756      | 0,361371   | 0,635967   | no  |
| AN10043 | ChrVIII_A_nidulans_FGSC_A4:4338031-4340285 | WT_5hasex | WT_veg | OK     | 33,5861  | 16,6952  | -1,00843      | 1,97129       | 0,0486904  | 0,174392   | no  |

## Supplementary table 1

|         |                                            |           |        |        |          |         |               |               |            |            |     |
|---------|--------------------------------------------|-----------|--------|--------|----------|---------|---------------|---------------|------------|------------|-----|
| AN10045 | ChrVIII_A_nidulans_FGSC_A4:4214999-4215743 | WT_5hasex | WT_veg | OK     | 4,06767  | 4,29682 | 0,0790675     | -0,0907117    | 0,927722   | 0,972581   | no  |
| AN10047 | ChrVIII_A_nidulans_FGSC_A4:4071742-4073355 | WT_5hasex | WT_veg | OK     | 0,554272 | 6,31193 | 3,50941       | -4,12339      | 3,7334E-05 | 0,00046458 | yes |
| AN10048 | ChrVIII_A_nidulans_FGSC_A4:4197242-4198244 | WT_5hasex | WT_veg | NOTEST | 1,18739  | 3,5958  | 1,59852       | -1,66911      | 0,0950957  | 1          | no  |
| AN10050 | ChrVIII_A_nidulans_FGSC_A4:4038250-4039020 | WT_5hasex | WT_veg | OK     | 313,522  | 573,642 | 0,871582      | -1,79361      | 0,0728759  | 0,231866   | no  |
| AN10051 | ChrVIII_A_nidulans_FGSC_A4:4037420-4037774 | WT_5hasex | WT_veg | OK     | 21,3672  | 23,2468 | 0,121635      | -0,15806      | 0,874409   | 0,951982   | no  |
| AN10052 | ChrVIII_A_nidulans_FGSC_A4:3952397-3953507 | WT_5hasex | WT_veg | OK     | 24,4204  | 182,424 | 2,90114       | -5,31874      | 1,0449E-07 | 2,4238E-06 | yes |
| AN10053 | ChrVIII_A_nidulans_FGSC_A4:3916538-3917591 | WT_5hasex | WT_veg | OK     | 27,1001  | 21,11   | -0,360372     | 0,598883      | 0,549251   | 0,781627   | no  |
| AN10054 | ChrVIII_A_nidulans_FGSC_A4:3844558-3846011 | WT_5hasex | WT_veg | OK     | 39,1131  | 57,0894 | 0,545573      | -1,07656      | 0,281678   | 0,555429   | no  |
| AN10055 | ChrVIII_A_nidulans_FGSC_A4:3842920-3844204 | WT_5hasex | WT_veg | OK     | 49,463   | 256,896 | 2,37676       | -4,68424      | 2,81E-06   | 4,6363E-05 | yes |
| AN10056 | ChrVIII_A_nidulans_FGSC_A4:3819540-3822235 | WT_5hasex | WT_veg | OK     | 30,9204  | 59,3303 | 0,940211      | -1,95075      | 0,0510872  | 0,180396   | no  |
| AN10057 | ChrVIII_A_nidulans_FGSC_A4:3797354-3801144 | WT_5hasex | WT_veg | OK     | 7,94006  | 50,7963 | 2,6775        | -4,1641       | 3,1258E-05 | 0,00039757 | yes |
| AN10058 | ChrVIII_A_nidulans_FGSC_A4:3789789-3791467 | WT_5hasex | WT_veg | OK     | 15,159   | 61,2308 | 2,01408       | -3,64096      | 0,00027162 | 0,00259354 | yes |
| AN10059 | ChrVIII_A_nidulans_FGSC_A4:3755093-3757404 | WT_5hasex | WT_veg | OK     | 26,119   | 26,8005 | 0,0371609     | -0,0638638    | 0,949079   | 0,98123    | no  |
| AN10060 | ChrVIII_A_nidulans_FGSC_A4:3822671-3827536 | WT_5hasex | WT_veg | OK     | 81,6633  | 354,297 | 2,1172        | -3,37195      | 0,00074638 | 0,00611502 | yes |
| AN10061 | ChrVIII_A_nidulans_FGSC_A4:3801704-3804446 | WT_5hasex | WT_veg | OK     | 18,6988  | 38,5454 | 1,04362       | -2,09106      | 0,036523   | 0,141006   | no  |
| AN10062 | ChrVIII_A_nidulans_FGSC_A4:3747387-3749146 | WT_5hasex | WT_veg | OK     | 4,24831  | 3,48365 | -0,286292     | 0,384406      | 0,700678   | 0,86976    | no  |
| AN10063 | ChrVIII_A_nidulans_FGSC_A4:4000382-4003298 | WT_5hasex | WT_veg | OK     | 6,54953  | 6,46413 | -0,0189359    | 0,03322       | 0,973499   | 0,990607   | no  |
| AN10064 | ChrVIII_A_nidulans_FGSC_A4:3953948-3955347 | WT_5hasex | WT_veg | OK     | 43,9709  | 95,038  | 1,11196       | -2,23462      | 0,0254422  | 0,106889   | no  |
| AN10065 | ChrVIII_A_nidulans_FGSC_A4:3955872-3957472 | WT_5hasex | WT_veg | OK     | 3,33063  | 3,2588  | -0,031451     | 0,0386694     | 0,969154   | 0,988797   | no  |
| AN10066 | ChrVIII_A_nidulans_FGSC_A4:3846215-3847310 | WT_5hasex | WT_veg | OK     | 23,3108  | 57,3741 | 1,2994        | -2,38225      | 0,0172072  | 0,0794654  | no  |
| AN10067 | ChrVIII_A_nidulans_FGSC_A4:3760350-3761306 | WT_5hasex | WT_veg | OK     | 102,626  | 173,967 | 0,761425      | -1,57665      | 0,114877   | 0,31807    | no  |
| AN10068 | ChrVIII_A_nidulans_FGSC_A4:3792159-3794565 | WT_5hasex | WT_veg | OK     | 13,7312  | 39,0247 | 1,50692       | -2,90449      | 0,00367851 | 0,0231935  | yes |
| AN10069 | ChrVIII_A_nidulans_FGSC_A4:3753300-3754656 | WT_5hasex | WT_veg | NOTEST | 0,326553 | 2,54985 | 2,96503       | -2,25148      | 0,0243551  | 1          | no  |
| AN10070 | ChrVIII_A_nidulans_FGSC_A4:3743883-3744615 | WT_5hasex | WT_veg | OK     | 14,6854  | 30,2309 | 1,04165       | -1,64021      | 0,100961   | 0,291429   | no  |
| AN10071 | ChrVIII_A_nidulans_FGSC_A4:3918176-3920205 | WT_5hasex | WT_veg | OK     | 38,2019  | 43,9791 | 0,203173      | -0,393179     | 0,694188   | 0,866119   | no  |
| AN10072 | ChrVIII_A_nidulans_FGSC_A4:3921041-3922942 | WT_5hasex | WT_veg | OK     | 20,3707  | 30,984  | 0,605031      | -1,18114      | 0,237547   | 0,502992   | no  |
| AN10073 | ChrVIII_A_nidulans_FGSC_A4:3841289-3842706 | WT_5hasex | WT_veg | OK     | 48,6767  | 73,2417 | 0,589433      | -1,20205      | 0,229345   | 0,492507   | no  |
| AN10074 | ChrVIII_A_nidulans_FGSC_A4:3761583-3763346 | WT_5hasex | WT_veg | OK     | 5,13504  | 7,5712  | 0,560148      | -0,840916     | 0,400395   | 0,672484   | no  |
| AN10075 | ChrVIII_A_nidulans_FGSC_A4:3744795-3746875 | WT_5hasex | WT_veg | OK     | 16,918   | 37,3328 | 1,14188       | -2,01442      | 0,0439656  | 0,161699   | no  |
| AN10076 | ChrVIII_A_nidulans_FGSC_A4:3619016-3621015 | WT_5hasex | WT_veg | OK     | 18,8327  | 30,2064 | 0,681617      | -1,29402      | 0,195658   | 0,448331   | no  |
| AN10077 | ChrVIII_A_nidulans_FGSC_A4:3590460-3592550 | WT_5hasex | WT_veg | OK     | 40,6221  | 50,1948 | 0,305275      | -0,632511     | 0,527053   | 0,767675   | no  |
| AN10078 | ChrVIII_A_nidulans_FGSC_A4:3586321-3588833 | WT_5hasex | WT_veg | OK     | 22,951   | 26,7841 | 0,22282       | -0,413157     | 0,679491   | 0,85826    | no  |
| AN10080 | ChrVIII_A_nidulans_FGSC_A4:3501638-3503199 | WT_5hasex | WT_veg | OK     | 187,96   | 134,29  | -0,485074     | 0,959967      | 0,337072   | 0,61303    | no  |
| AN10082 | ChrVIII_A_nidulans_FGSC_A4:3388277-3390643 | WT_5hasex | WT_veg | OK     | 5,82139  | 8,27154 | 0,506794      | -0,775444     | 0,438077   | 0,702774   | no  |
| AN10083 | ChrVIII_A_nidulans_FGSC_A4:3373218-3375068 | WT_5hasex | WT_veg | OK     | 5,841    | 17,2577 | 1,56295       | -2,4484       | 0,0143492  | 0,0691362  | no  |
| AN10084 | ChrVIII_A_nidulans_FGSC_A4:3349008-3351036 | WT_5hasex | WT_veg | OK     | 3,13785  | 5,55527 | 0,824083      | -1,17229      | 0,241082   | 0,507274   | no  |
| AN10085 | ChrVIII_A_nidulans_FGSC_A4:3310571-3311851 | WT_5hasex | WT_veg | NOTEST | 0        | 0       | 0             | 0             | 1          | 1          | no  |
| AN10086 | ChrVIII_A_nidulans_FGSC_A4:3183884-3185764 | WT_5hasex | WT_veg | NOTEST | 1,59305  | 2,9445  | 0,886227      | -1,10954      | 0,267198   | 1          | no  |
| AN10087 | ChrVIII_A_nidulans_FGSC_A4:3617086-3618479 | WT_5hasex | WT_veg | OK     | 105,509  | 198,83  | 0,914171      | -1,89648      | 0,0578971  | 0,196918   | no  |
| AN10088 | ChrVIII_A_nidulans_FGSC_A4:3593559-3595047 | WT_5hasex | WT_veg | OK     | 96,3656  | 138,838 | 0,526811      | -1,06444      | 0,287129   | 0,561402   | no  |
| AN10089 | ChrVIII_A_nidulans_FGSC_A4:3583460-3585998 | WT_5hasex | WT_veg | OK     | 5,75143  | 7,43863 | 0,371115      | -0,58892      | 0,555915   | 0,785909   | no  |
| AN1009  | ChrVIII_A_nidulans_FGSC_A4:1814430-1814862 | WT_5hasex | WT_veg | OK     | 3,39272  | 15,0466 | 2,14893       | -2,25592      | 0,0240754  | 0,102459   | no  |
| AN10090 | ChrVIII_A_nidulans_FGSC_A4:3498821-3500229 | WT_5hasex | WT_veg | OK     | 81,0669  | 173,376 | 1,09672       | -2,0312       | 0,0422348  | 0,156953   | no  |
| AN10091 | ChrVIII_A_nidulans_FGSC_A4:3493225-3493849 | WT_5hasex | WT_veg | OK     | 82,5316  | 121,325 | 0,555858      | -0,984536     | 0,324852   | 0,601515   | no  |
| AN10093 | ChrVIII_A_nidulans_FGSC_A4:3428061-3429750 | WT_5hasex | WT_veg | OK     | 13,0621  | 32,8105 | 1,32878       | -2,08175      | 0,0373657  | 0,143472   | no  |
| AN10095 | ChrVIII_A_nidulans_FGSC_A4:3391476-3391837 | WT_5hasex | WT_veg | OK     | 0,731092 | 9,61727 | 3,7175        | -1,75197      | 0,0797785  | 0,247305   | no  |
| AN10096 | ChrVIII_A_nidulans_FGSC_A4:3351371-3352228 | WT_5hasex | WT_veg | OK     | 44,8945  | 258,478 | 2,52543       | -4,94957      | 7,4376E-07 | 1,4116E-05 | yes |
| AN10098 | ChrVIII_A_nidulans_FGSC_A4:3403493-3404492 | WT_5hasex | WT_veg | NOTEST | 1,25025  | 2,68972 | 1,10524       | -1,08534      | 0,277773   | 1          | no  |
| AN10099 | ChrVIII_A_nidulans_FGSC_A4:3186276-3187095 | WT_5hasex | WT_veg | OK     | 8,1526   | 12,8078 | 0,651686      | -0,935025     | 0,349776   | 0,625262   | no  |
| AN1010  | ChrVIII_A_nidulans_FGSC_A4:1812645-1814394 | WT_5hasex | WT_veg | OK     | 24,5781  | 40,0193 | 0,703323      | -1,36601      | 0,171937   | 0,414055   | no  |
| AN10100 | ChrVIII_A_nidulans_FGSC_A4:3067584-3068358 | WT_5hasex | WT_veg | NOTEST | 0,359473 | 2,90011 | 3,01215       | -1,37924      | 0,16782    | 1          | no  |
| AN10103 | ChrVIII_A_nidulans_FGSC_A4:3569135-3570516 | WT_5hasex | WT_veg | OK     | 147,599  | 458,665 | 1,63575       | -3,37553      | 0,00073673 | 0,0060492  | yes |
| AN10104 | ChrVIII_A_nidulans_FGSC_A4:3306660-3308379 | WT_5hasex | WT_veg | NOTEST | 0,106119 | 0       | -1.79769e+308 | -1.79769e+308 | 0,165569   | 1          | no  |

## Supplementary table 1

|         |                                            |           |        |        |          |          |               |               |            |            |     |
|---------|--------------------------------------------|-----------|--------|--------|----------|----------|---------------|---------------|------------|------------|-----|
| AN10105 | ChrVIII_A_nidulans_FGSC_A4:2915279-2918945 | WT_5hasex | WT_veg | OK     | 8,07612  | 8,08408  | 0,00142129    | -0,00258457   | 0,997938   | 0,999292   | no  |
| AN10108 | ChrVIII_A_nidulans_FGSC_A4:2811337-2812133 | WT_5hasex | WT_veg | OK     | 32,4851  | 96,3573  | 1,56862       | -2,91447      | 0,00356287 | 0,0225703  | yes |
| AN10109 | ChrVIII_A_nidulans_FGSC_A4:2748859-2749640 | WT_5hasex | WT_veg | NOTEST | 1,96249  | 1,65643  | -0,244612     | 0,191757      | 0,847933   | 1          | no  |
| AN10111 | ChrVIII_A_nidulans_FGSC_A4:1811134-1812300 | WT_5hasex | WT_veg | OK     | 43,8004  | 52,2261  | 0,253829      | -0,484751     | 0,627853   | 0,828805   | no  |
| AN10110 | ChrVIII_A_nidulans_FGSC_A4:2820943-2821831 | WT_5hasex | WT_veg | OK     | 34,5221  | 66,1554  | 0,938341      | -1,77136      | 0,0765014  | 0,24015    | no  |
| AN10111 | ChrVIII_A_nidulans_FGSC_A4:2812394-2813657 | WT_5hasex | WT_veg | OK     | 30,8084  | 59,8167  | 0,957226      | -1,86144      | 0,0626822  | 0,208415   | no  |
| AN10112 | ChrVIII_A_nidulans_FGSC_A4:2893844-2898619 | WT_5hasex | WT_veg | OK     | 16,0915  | 25,5074  | 0,664616      | -1,37251      | 0,169904   | 0,410707   | no  |
| AN10113 | ChrVIII_A_nidulans_FGSC_A4:2747416-2748450 | WT_5hasex | WT_veg | NOTEST | 0,242549 | 0        | -1.79769e+308 | -1.79769e+308 | 0,224063   | 1          | no  |
| AN10115 | ChrVIII_A_nidulans_FGSC_A4:2668992-2671133 | WT_5hasex | WT_veg | OK     | 10,3417  | 19,1671  | 0,89016       | -1,56255      | 0,118158   | 0,324358   | no  |
| AN10116 | ChrVIII_A_nidulans_FGSC_A4:2672253-2674230 | WT_5hasex | WT_veg | OK     | 12,9539  | 22,6896  | 0,808645      | -1,45576      | 0,145459   | 0,371658   | no  |
| AN10117 | ChrVIII_A_nidulans_FGSC_A4:2696002-2696948 | WT_5hasex | WT_veg | OK     | 18,1846  | 29,1785  | 0,682188      | -1,10501      | 0,269156   | 0,540962   | no  |
| AN10118 | ChrVIII_A_nidulans_FGSC_A4:2642417-2644376 | WT_5hasex | WT_veg | OK     | 11,6111  | 8,9271   | -0,379247     | 0,652287      | 0,514216   | 0,75887    | no  |
| AN10119 | ChrVIII_A_nidulans_FGSC_A4:2526766-2528519 | WT_5hasex | WT_veg | OK     | 38,6566  | 34,1121  | -0,18043      | 0,363985      | 0,715869   | 0,87801    | no  |
| AN1012  | ChrVIII_A_nidulans_FGSC_A4:1810039-1810879 | WT_5hasex | WT_veg | OK     | 10,8694  | 26,0494  | 1,26098       | -1,85552      | 0,0635221  | 0,210317   | no  |
| AN10120 | ChrVIII_A_nidulans_FGSC_A4:2511398-2513770 | WT_5hasex | WT_veg | OK     | 2,52152  | 2,24736  | -0,166064     | 0,221467      | 0,824729   | 0,930087   | no  |
| AN10121 | ChrVIII_A_nidulans_FGSC_A4:2525551-2526490 | WT_5hasex | WT_veg | OK     | 26,6391  | 17,5575  | -0,601455     | 0,995352      | 0,319565   | 0,595726   | no  |
| AN10122 | ChrVIII_A_nidulans_FGSC_A4:2513902-2515001 | WT_5hasex | WT_veg | OK     | 6,15092  | 15,5765  | 1,34049       | -1,8982       | 0,0576698  | 0,196337   | no  |
| AN10123 | ChrVIII_A_nidulans_FGSC_A4:2640563-2642005 | WT_5hasex | WT_veg | OK     | 9,07144  | 12,2019  | 0,427708      | -0,622345     | 0,533715   | 0,772156   | no  |
| AN10124 | ChrVIII_A_nidulans_FGSC_A4:2403710-2405414 | WT_5hasex | WT_veg | OK     | 44,3279  | 123,593  | 1,47931       | -3,00499      | 0,00265586 | 0,0176579  | yes |
| AN10125 | ChrVIII_A_nidulans_FGSC_A4:2314857-2317630 | WT_5hasex | WT_veg | OK     | 15,6462  | 106,77   | 2,77063       | -5,49488      | 3,9098E-08 | 9,9456E-07 | yes |
| AN10126 | ChrVIII_A_nidulans_FGSC_A4:2313666-2314770 | WT_5hasex | WT_veg | OK     | 3,86862  | 17,3195  | 2,16251       | -2,5437       | 0,0109685  | 0,0560044  | no  |
| AN10128 | ChrVIII_A_nidulans_FGSC_A4:2195654-2199307 | WT_5hasex | WT_veg | OK     | 14,2593  | 20,1373  | 0,497966      | -0,988317     | 0,322997   | 0,599289   | no  |
| AN10129 | ChrVIII_A_nidulans_FGSC_A4:1994624-1995467 | WT_5hasex | WT_veg | OK     | 58,9137  | 105,298  | 0,837805      | -1,65198      | 0,0985395  | 0,286361   | no  |
| AN1013  | ChrVIII_A_nidulans_FGSC_A4:1808548-1809777 | WT_5hasex | WT_veg | OK     | 860,863  | 1591,49  | 0,886522      | -1,55371      | 0,120254   | 0,127815   | no  |
| AN10130 | ChrVIII_A_nidulans_FGSC_A4:1957217-1958045 | WT_5hasex | WT_veg | OK     | 2717,94  | 4773,65  | 0,812578      | -1,34575      | 0,178382   | 0,42369    | no  |
| AN10132 | ChrVIII_A_nidulans_FGSC_A4:2132226-2134170 | WT_5hasex | WT_veg | OK     | 43,2288  | 118,856  | 1,45916       | -2,66446      | 0,00771118 | 0,0423255  | yes |
| AN10133 | ChrVIII_A_nidulans_FGSC_A4:2192402-2194892 | WT_5hasex | WT_veg | OK     | 41,0291  | 52,6798  | 0,360602      | -0,718878     | 0,472216   | 0,729444   | no  |
| AN10134 | ChrVIII_A_nidulans_FGSC_A4:1995828-1996960 | WT_5hasex | WT_veg | OK     | 37,9315  | 82,0871  | 1,11376       | -2,14305      | 0,0321089  | 0,12789    | no  |
| AN10135 | ChrVIII_A_nidulans_FGSC_A4:1997179-1998276 | WT_5hasex | WT_veg | OK     | 77,0316  | 290,156  | 1,91331       | -3,55924      | 0,00037193 | 0,00337722 | yes |
| AN10137 | ChrVIII_A_nidulans_FGSC_A4:1955377-1957078 | WT_5hasex | WT_veg | OK     | 24,0405  | 20,9972  | -0,19527      | 0,379292      | 0,704471   | 0,871987   | no  |
| AN10138 | ChrVIII_A_nidulans_FGSC_A4:1856810-1857746 | WT_5hasex | WT_veg | OK     | 9,42229  | 17,6971  | 0,909365      | -1,37243      | 0,169931   | 0,410753   | no  |
| AN10139 | ChrVIII_A_nidulans_FGSC_A4:1693908-1695101 | WT_5hasex | WT_veg | OK     | 20,0778  | 26,8839  | 0,421136      | -0,741396     | 0,458453   | 0,718899   | no  |
| AN1014  | ChrVIII_A_nidulans_FGSC_A4:1799694-1802171 | WT_5hasex | WT_veg | OK     | 26,3347  | 27,8312  | 0,0797363     | -0,14976      | 0,880954   | 0,95479    | no  |
| AN10140 | ChrVIII_A_nidulans_FGSC_A4:1802377-1806396 | WT_5hasex | WT_veg | OK     | 75,2826  | 116,96   | 0,635628      | -1,238        | 0,215715   | 0,475613   | no  |
| AN10141 | ChrVIII_A_nidulans_FGSC_A4:1854144-1856208 | WT_5hasex | WT_veg | NOTEST | 0,319649 | 0,856757 | 1,42239       | -1,18124      | 0,237506   | 1          | no  |
| AN10142 | ChrVIII_A_nidulans_FGSC_A4:1843499-1845385 | WT_5hasex | WT_veg | OK     | 315,828  | 584,709  | 0,888583      | -1,83931      | 0,0658693  | 0,215865   | no  |
| AN10144 | ChrVIII_A_nidulans_FGSC_A4:1695824-1696406 | WT_5hasex | WT_veg | OK     | 1,45365  | 7,53197  | 2,37335       | -2,49386      | 0,0126361  | 0,0626568  | no  |
| AN10145 | ChrVIII_A_nidulans_FGSC_A4:1675641-1677361 | WT_5hasex | WT_veg | OK     | 7,75629  | 11,6761  | 0,590125      | -0,969562     | 0,332265   | 0,608661   | no  |
| AN10146 | ChrVIII_A_nidulans_FGSC_A4:1564332-1565408 | WT_5hasex | WT_veg | OK     | 5,15211  | 16,6436  | 1,69173       | -2,29268      | 0,0218667  | 0,095369   | no  |
| AN10149 | ChrVIII_A_nidulans_FGSC_A4:1387631-1389455 | WT_5hasex | WT_veg | OK     | 123,162  | 305,702  | 1,31157       | -2,43179      | 0,0150244  | 0,071629   | no  |
| AN1015  | ChrVIII_A_nidulans_FGSC_A4:1796042-1799541 | WT_5hasex | WT_veg | OK     | 213,141  | 244,375  | 0,197291      | -0,347152     | 0,728477   | 0,885001   | no  |
| AN10151 | ChrVIII_A_nidulans_FGSC_A4:1275659-1277773 | WT_5hasex | WT_veg | OK     | 8,35236  | 5,42707  | -0,622011     | 0,894021      | 0,37131    | 0,646082   | no  |
| AN10152 | ChrVIII_A_nidulans_FGSC_A4:1278173-1279717 | WT_5hasex | WT_veg | OK     | 3,61147  | 2,82518  | -0,354247     | 0,393568      | 0,6939     | 0,8659     | no  |
| AN10154 | ChrVIII_A_nidulans_FGSC_A4:1364770-1365372 | WT_5hasex | WT_veg | OK     | 4,70941  | 4,3889   | -0,101686     | 0,106274      | 0,915365   | 0,967622   | no  |
| AN10155 | ChrVIII_A_nidulans_FGSC_A4:1389713-1391138 | WT_5hasex | WT_veg | OK     | 11,8865  | 20,5744  | 0,791522      | -1,3027       | 0,192678   | 0,44425    | no  |
| AN10156 | ChrVIII_A_nidulans_FGSC_A4:1406376-1407938 | WT_5hasex | WT_veg | OK     | 105,596  | 185,04   | 0,809277      | -1,66616      | 0,0956814  | 0,280677   | no  |
| AN10157 | ChrVIII_A_nidulans_FGSC_A4:1547698-1548968 | WT_5hasex | WT_veg | OK     | 42,7096  | 33,6119  | -0,345586     | 0,693813      | 0,487799   | 0,741146   | no  |
| AN10158 | ChrVIII_A_nidulans_FGSC_A4:1562932-1564031 | WT_5hasex | WT_veg | OK     | 29,916   | 55,14    | 0,882185      | -1,66546      | 0,0958212  | 0,281002   | no  |
| AN10159 | ChrVIII_A_nidulans_FGSC_A4:1629939-1630542 | WT_5hasex | WT_veg | OK     | 424,137  | 988,304  | 1,22043       | -2,43799      | 0,0147692  | 0,0706983  | no  |
| AN10160 | ChrVIII_A_nidulans_FGSC_A4:1674513-1675464 | WT_5hasex | WT_veg | OK     | 11,6975  | 25,5799  | 1,12882       | -1,67104      | 0,0947128  | 0,278712   | no  |
| AN10161 | ChrVIII_A_nidulans_FGSC_A4:1596025-1596720 | WT_5hasex | WT_veg | OK     | 82,4149  | 325,776  | 1,9829        | -3,89404      | 9,8588E-05 | 0,00108261 | yes |
| AN10163 | ChrVIII_A_nidulans_FGSC_A4:1579976-1580644 | WT_5hasex | WT_veg | OK     | 422,73   | 636,096  | 0,589508      | -1,1853       | 0,235898   | 0,50132    | no  |
| AN10164 | ChrVIII_A_nidulans_FGSC_A4:1549490-1551848 | WT_5hasex | WT_veg | OK     | 41,55    | 125,293  | 1,59239       | -3,23127      | 0,0012324  | 0,00932703 | yes |



## Supplementary table 1

|         |                                            |           |        |    |         |          |           |           |            |            |     |
|---------|--------------------------------------------|-----------|--------|----|---------|----------|-----------|-----------|------------|------------|-----|
| AN10165 | ChrVIII_A_nidulans_FGSC_A4:1511523-1512335 | WT_5hasex | WT_veg | OK | 4,54547 | 19,1628  | 2,07581   | -2,49231  | 0,0126916  | 0,0628607  | no  |
| AN10166 | ChrVIII_A_nidulans_FGSC_A4:1512681-1514140 | WT_5hasex | WT_veg | OK | 114,453 | 174,986  | 0,612483  | -1,18415  | 0,236355   | 0,501741   | no  |
| AN10167 | ChrVIII_A_nidulans_FGSC_A4:1475077-1477569 | WT_5hasex | WT_veg | OK | 6,4415  | 8,978975 | 0,478975  | -0,795565 | 0,426285   | 0,693428   | no  |
| AN10168 | ChrVIII_A_nidulans_FGSC_A4:1113350-1114485 | WT_5hasex | WT_veg | OK | 123,018 | 414,436  | 1,75228   | -3,54359  | 0,00039472 | 0,00355515 | yes |
| AN10169 | ChrVIII_A_nidulans_FGSC_A4:1013031-1013975 | WT_5hasex | WT_veg | OK | 10,6043 | 38,0441  | 1,84302   | -2,818    | 0,00483231 | 0,0289431  | yes |
| AN10170 | ChrVIII_A_nidulans_FGSC_A4:953770-955414   | WT_5hasex | WT_veg | OK | 215,87  | 468,097  | 1,11665   | -2,21946  | 0,0264553  | 0,110147   | no  |
| AN10171 | ChrVIII_A_nidulans_FGSC_A4:934940-937443   | WT_5hasex | WT_veg | OK | 18,9652 | 23,5139  | 0,31016   | -0,623972 | 0,532646   | 0,771533   | no  |
| AN10172 | ChrVIII_A_nidulans_FGSC_A4:906901-908448   | WT_5hasex | WT_veg | OK | 240,893 | 350,616  | 0,541502  | -1,08778  | 0,276693   | 0,54988    | no  |
| AN10173 | ChrVIII_A_nidulans_FGSC_A4:1114703-1116975 | WT_5hasex | WT_veg | OK | 19,4229 | 132,576  | 2,77099   | -5,36235  | 8,2147E-08 | 1,954E-06  | yes |
| AN10174 | ChrVIII_A_nidulans_FGSC_A4:1012072-1012845 | WT_5hasex | WT_veg | OK | 213,839 | 945,979  | 2,14528   | -4,44125  | 8,944E-06  | 0,0001303  | yes |
| AN10175 | ChrVIII_A_nidulans_FGSC_A4:955706-956397   | WT_5hasex | WT_veg | OK | 118,806 | 211,206  | 0,830043  | -1,69035  | 0,0909603  | 0,270916   | no  |
| AN10176 | ChrVIII_A_nidulans_FGSC_A4:937673-938129   | WT_5hasex | WT_veg | OK | 11,5508 | 23,6482  | 1,03374   | -1,37503  | 0,169123   | 0,40931    | no  |
| AN10177 | ChrVIII_A_nidulans_FGSC_A4:1171341-1172025 | WT_5hasex | WT_veg | OK | 89,6503 | 144,977  | 0,693443  | -1,25101  | 0,210931   | 0,46951    | no  |
| AN10178 | ChrVIII_A_nidulans_FGSC_A4:930091-931033   | WT_5hasex | WT_veg | OK | 155,249 | 131,878  | -0,23538  | 0,464327  | 0,642414   | 0,837407   | no  |
| AN10179 | ChrVIII_A_nidulans_FGSC_A4:905377-906635   | WT_5hasex | WT_veg | OK | 18,8125 | 15,2329  | -0,304502 | 0,537724  | 0,590767   | 0,807328   | no  |
| AN1018  | ChrVIII_A_nidulans_FGSC_A4:1783854-1786969 | WT_5hasex | WT_veg | OK | 17,343  | 33,3254  | 0,942269  | -1,86142  | 0,0626852  | 0,208415   | no  |
| AN10180 | ChrVIII_A_nidulans_FGSC_A4:902887-904671   | WT_5hasex | WT_veg | OK | 3,29399 | 7,69307  | 1,22372   | -1,67327  | 0,0942737  | 0,277776   | no  |
| AN10181 | ChrVIII_A_nidulans_FGSC_A4:793820-796083   | WT_5hasex | WT_veg | OK | 144,783 | 214,954  | 0,570132  | -1,11736  | 0,263841   | 0,534805   | no  |
| AN10182 | ChrVIII_A_nidulans_FGSC_A4:759852-761459   | WT_5hasex | WT_veg | OK | 150,867 | 258,21   | 0,775266  | -1,5337   | 0,125104   | 0,336518   | no  |
| AN10183 | ChrVIII_A_nidulans_FGSC_A4:796354-797393   | WT_5hasex | WT_veg | OK | 8,51526 | 16,7003  | 0,971755  | -1,48893  | 0,136505   | 0,35673    | no  |
| AN10184 | ChrVIII_A_nidulans_FGSC_A4:674838-677096   | WT_5hasex | WT_veg | OK | 33,4006 | 36,5149  | 0,128611  | -0,261628 | 0,793608   | 0,916031   | no  |
| AN10185 | ChrVIII_A_nidulans_FGSC_A4:665010-666686   | WT_5hasex | WT_veg | OK | 46,7649 | 154,893  | 1,72777   | -3,58781  | 0,00033346 | 0,0030786  | yes |
| AN10186 | ChrVIII_A_nidulans_FGSC_A4:648395-650362   | WT_5hasex | WT_veg | OK | 50,4366 | 80,096   | 0,667259  | -1,38092  | 0,167303   | 0,406514   | no  |
| AN10187 | ChrVIII_A_nidulans_FGSC_A4:664209-664671   | WT_5hasex | WT_veg | OK | 23,0319 | 37,8463  | 0,716514  | -1,09359  | 0,274135   | 0,546898   | no  |
| AN10188 | ChrVIII_A_nidulans_FGSC_A4:650496-653350   | WT_5hasex | WT_veg | OK | 74,4154 | 145,467  | 0,967016  | -1,91858  | 0,055037   | 0,189882   | no  |
| AN10189 | ChrVIII_A_nidulans_FGSC_A4:677384-678239   | WT_5hasex | WT_veg | OK | 41,118  | 83,1142  | 1,01533   | -1,81832  | 0,0690146  | 0,223241   | no  |
| AN1019  | ChrVIII_A_nidulans_FGSC_A4:1780196-1783448 | WT_5hasex | WT_veg | OK | 87,536  | 141,947  | 0,697406  | -1,41019  | 0,158482   | 0,393201   | no  |
| AN10190 | ChrVII_A_nidulans_FGSC_A4:699955-701557    | WT_5hasex | WT_veg | OK | 46,1147 | 131,25   | 1,50902   | -3,13419  | 0,00172329 | 0,0123349  | yes |
| AN10191 | ChrVII_A_nidulans_FGSC_A4:786510-791596    | WT_5hasex | WT_veg | OK | 16,3815 | 25,0618  | 0,613422  | -1,25559  | 0,209264   | 0,46707    | no  |
| AN10192 | ChrVII_A_nidulans_FGSC_A4:861113-863568    | WT_5hasex | WT_veg | OK | 6,45553 | 5,17486  | -0,319017 | 0,522691  | 0,601189   | 0,813855   | no  |
| AN10193 | ChrVII_A_nidulans_FGSC_A4:896342-897701    | WT_5hasex | WT_veg | OK | 33,9327 | 38,3288  | 0,175754  | -0,34993  | 0,726391   | 0,88384    | no  |
| AN10194 | ChrVII_A_nidulans_FGSC_A4:908122-914923    | WT_5hasex | WT_veg | OK | 23,54   | 58,7588  | 1,31969   | -2,72707  | 0,00639002 | 0,0363888  | yes |
| AN10195 | ChrVII_A_nidulans_FGSC_A4:928641-932143    | WT_5hasex | WT_veg | OK | 94,2608 | 177,791  | 0,915452  | -1,82826  | 0,0675101  | 0,219758   | no  |
| AN10196 | ChrVII_A_nidulans_FGSC_A4:939517-941248    | WT_5hasex | WT_veg | OK | 61,558  | 127,16   | 1,04663   | -2,19252  | 0,0283421  | 0,116039   | no  |
| AN10197 | ChrVII_A_nidulans_FGSC_A4:863758-865169    | WT_5hasex | WT_veg | OK | 29,8862 | 122,967  | 2,04071   | -3,80559  | 0,00014147 | 0,00147966 | yes |
| AN10198 | ChrVII_A_nidulans_FGSC_A4:905273-908029    | WT_5hasex | WT_veg | OK | 38,4668 | 79,4382  | 1,04622   | -2,12609  | 0,0334954  | 0,132161   | no  |
| AN10199 | ChrVII_A_nidulans_FGSC_A4:903993-905196    | WT_5hasex | WT_veg | OK | 11,6064 | 9,67208  | -0,263022 | 0,413763  | 0,679048   | 0,857962   | no  |
| AN1020  | ChrVIII_A_nidulans_FGSC_A4:1779034-1779568 | WT_5hasex | WT_veg | OK | 91,6663 | 338,87   | 1,88627   | -3,51824  | 0,00043442 | 0,00385906 | yes |
| AN10200 | ChrVII_A_nidulans_FGSC_A4:927321-928443    | WT_5hasex | WT_veg | OK | 42,6099 | 310,347  | 2,86462   | -5,5992   | 2,1535E-08 | 5,8018E-07 | yes |
| AN10201 | ChrVII_A_nidulans_FGSC_A4:936875-939351    | WT_5hasex | WT_veg | OK | 14,2965 | 21,2671  | 0,572967  | -1,10316  | 0,269958   | 0,542005   | no  |
| AN10202 | ChrVII_A_nidulans_FGSC_A4:681184-683748    | WT_5hasex | WT_veg | OK | 474,124 | 1587,76  | 1,74366   | -2,85608  | 0,00428906 | 0,0262741  | yes |
| AN10203 | ChrVII_A_nidulans_FGSC_A4:698116-699465    | WT_5hasex | WT_veg | OK | 15,7769 | 29,9544  | 0,924956  | -1,64319  | 0,100343   | 0,290091   | no  |
| AN10204 | ChrVII_A_nidulans_FGSC_A4:791781-792689    | WT_5hasex | WT_veg | OK | 6,71785 | 17,3801  | 1,37137   | -1,92632  | 0,0540641  | 0,187471   | no  |
| AN10205 | ChrVII_A_nidulans_FGSC_A4:683952-686091    | WT_5hasex | WT_veg | OK | 47,1188 | 91,4958  | 0,957402  | -1,88784  | 0,0590468  | 0,199984   | no  |
| AN10206 | ChrVII_A_nidulans_FGSC_A4:686235-686825    | WT_5hasex | WT_veg | OK | 59,3033 | 107,161  | 0,853597  | -1,64215  | 0,100559   | 0,290668   | no  |
| AN10207 | ChrVII_A_nidulans_FGSC_A4:898239-900226    | WT_5hasex | WT_veg | OK | 26,9283 | 58,962   | 1,13066   | -1,79588  | 0,0725132  | 0,231134   | no  |
| AN10209 | ChrVII_A_nidulans_FGSC_A4:970811-973635    | WT_5hasex | WT_veg | OK | 15,7948 | 36,7822  | 1,21956   | -2,25088  | 0,0243929  | 0,103424   | no  |
| AN1021  | ChrVIII_A_nidulans_FGSC_A4:1777377-1778661 | WT_5hasex | WT_veg | OK | 71,1472 | 244,185  | 1,7791    | -3,71196  | 0,00020566 | 0,00204302 | yes |
| AN10210 | ChrVII_A_nidulans_FGSC_A4:1019572-1021666  | WT_5hasex | WT_veg | OK | 5,81573 | 22,8606  | 1,97483   | -2,6705   | 0,00757383 | 0,0417521  | yes |
| AN10211 | ChrVII_A_nidulans_FGSC_A4:969316-970602    | WT_5hasex | WT_veg | OK | 16,3721 | 70,7946  | 2,1124    | -3,81519  | 0,00013608 | 0,00143565 | yes |
| AN10212 | ChrVII_A_nidulans_FGSC_A4:1021883-1023496  | WT_5hasex | WT_veg | OK | 22,759  | 32,9906  | 0,535615  | -1,03927  | 0,298679   | 0,574089   | no  |
| AN10213 | ChrVII_A_nidulans_FGSC_A4:1027687-1029364  | WT_5hasex | WT_veg | OK | 9,64174 | 47,9361  | 2,31375   | -3,89973  | 9,6299E-05 | 0,0010604  | yes |
| AN10214 | ChrVII_A_nidulans_FGSC_A4:1041135-1043011  | WT_5hasex | WT_veg | OK | 12,5097 | 31,1556  | 1,31644   | -2,3564   | 0,0184531  | 0,0837139  | no  |

## Supplementary table 1

|         |                                            |           |        |    |         |         |            |            |            |            |     |
|---------|--------------------------------------------|-----------|--------|----|---------|---------|------------|------------|------------|------------|-----|
| AN10216 | ChrVII_A_nidulans_FGSC_A4:1159855-1162180  | WT_5hasex | WT_veg | OK | 73,3416 | 47,2826 | -0,633323  | 1,30938    | 0,190406   | 0,441246   | no  |
| AN10217 | ChrVII_A_nidulans_FGSC_A4:1203939-1205039  | WT_5hasex | WT_veg | OK | 97,991  | 35,8371 | -1,4512    | 2,91976    | 0,00350303 | 0,0222777  | yes |
| AN10218 | ChrVII_A_nidulans_FGSC_A4:1205543-1207100  | WT_5hasex | WT_veg | OK | 27,521  | 78,2813 | 1,50813    | -3,00748   | 0,0026342  | 0,0175531  | yes |
| AN10219 | ChrVII_A_nidulans_FGSC_A4:1162583-1163411  | WT_5hasex | WT_veg | OK | 916,624 | 4416,73 | 2,26858    | -3,84892   | 0,00011864 | 0,00127503 | yes |
| AN1022  | ChrVIII_A_nidulans_FGSC_A4:1775719-1776961 | WT_5hasex | WT_veg | OK | 191,064 | 652,231 | 1,77133    | -3,54302   | 0,00039557 | 0,00356226 | yes |
| AN10221 | ChrVII_A_nidulans_FGSC_A4:1509068-1511088  | WT_5hasex | WT_veg | OK | 10,5034 | 27,7372 | 1,40096    | -2,4926    | 0,0126812  | 0,0628371  | no  |
| AN10222 | ChrVII_A_nidulans_FGSC_A4:1523055-1524301  | WT_5hasex | WT_veg | OK | 120,312 | 182,504 | 0,601148   | -1,20788   | 0,227092   | 0,489959   | no  |
| AN10223 | ChrVII_A_nidulans_FGSC_A4:1631475-1632694  | WT_5hasex | WT_veg | OK | 701,363 | 609,49  | -0,202557  | 0,380675   | 0,703444   | 0,871357   | no  |
| AN10224 | ChrVII_A_nidulans_FGSC_A4:1417749-1418316  | WT_5hasex | WT_veg | OK | 8,30172 | 44,0346 | 2,40716    | -3,38235   | 0,00071868 | 0,00592701 | yes |
| AN10225 | ChrVII_A_nidulans_FGSC_A4:1511105-1514685  | WT_5hasex | WT_veg | OK | 35,5015 | 67,3369 | 0,923518   | -1,90624   | 0,0566195  | 0,193755   | no  |
| AN10226 | ChrVII_A_nidulans_FGSC_A4:1521962-1522927  | WT_5hasex | WT_veg | OK | 3,56059 | 4,76803 | 0,421278   | -0,492738  | 0,622197   | 0,825469   | no  |
| AN10227 | ChrVII_A_nidulans_FGSC_A4:1633339-1636619  | WT_5hasex | WT_veg | OK | 7,60692 | 16,655  | 1,13057    | -2,10092   | 0,035648   | 0,138547   | no  |
| AN10228 | ChrVII_A_nidulans_FGSC_A4:1726808-1729543  | WT_5hasex | WT_veg | OK | 18,6619 | 84,3783 | 2,17678    | -4,41396   | 1,015E-05  | 0,00014589 | yes |
| AN10229 | ChrVII_A_nidulans_FGSC_A4:1729959-1731076  | WT_5hasex | WT_veg | OK | 286,458 | 310,608 | 0,116776   | -0,235164  | 0,814081   | 0,925469   | no  |
| AN10230 | ChrVII_A_nidulans_FGSC_A4:1749295-1750513  | WT_5hasex | WT_veg | OK | 52,3933 | 121,761 | 1,2166     | -2,4892    | 0,0128032  | 0,0633178  | no  |
| AN10231 | ChrVII_A_nidulans_FGSC_A4:1723841-1726070  | WT_5hasex | WT_veg | OK | 8,83121 | 22,9311 | 1,37662    | -2,42714   | 0,0152186  | 0,0722948  | no  |
| AN10232 | ChrVII_A_nidulans_FGSC_A4:1731347-1732906  | WT_5hasex | WT_veg | OK | 7,31327 | 42,006  | 2,52201    | -4,08716   | 4,367E-05  | 0,0053255  | yes |
| AN10233 | ChrVII_A_nidulans_FGSC_A4:1747453-1748998  | WT_5hasex | WT_veg | OK | 15,8306 | 46,9186 | 1,56744    | -2,69601   | 0,00701763 | 0,0392045  | yes |
| AN10234 | ChrVII_A_nidulans_FGSC_A4:2027418-2028466  | WT_5hasex | WT_veg | OK | 10,6748 | 38,1248 | 1,83652    | -2,7346    | 0,0062456  | 0,0356983  | yes |
| AN10235 | ChrVII_A_nidulans_FGSC_A4:2133076-2135032  | WT_5hasex | WT_veg | OK | 27,8887 | 71,1757 | 1,3517     | -2,50129   | 0,0123741  | 0,0616315  | no  |
| AN10236 | ChrVII_A_nidulans_FGSC_A4:2242045-2243505  | WT_5hasex | WT_veg | OK | 20,8596 | 48,5788 | 1,21961    | -2,24433   | 0,0248109  | 0,104742   | no  |
| AN10237 | ChrVII_A_nidulans_FGSC_A4:2438326-2439510  | WT_5hasex | WT_veg | OK | 243,055 | 885,756 | 1,86563    | -3,72156   | 0,000198   | 0,00197554 | yes |
| AN10238 | ChrVII_A_nidulans_FGSC_A4:2028743-2029700  | WT_5hasex | WT_veg | OK | 2,62843 | 5,26589 | 1,00248    | -1,06771   | 0,285651   | 0,559839   | no  |
| AN10239 | ChrVII_A_nidulans_FGSC_A4:2244337-2246171  | WT_5hasex | WT_veg | OK | 17,3241 | 36,4046 | 1,07134    | -2,04611   | 0,0407456  | 0,152838   | no  |
| AN1024  | ChrVIII_A_nidulans_FGSC_A4:1771000-1773782 | WT_5hasex | WT_veg | OK | 10,0617 | 35,4532 | 1,81704    | -3,42795   | 0,00060816 | 0,00514744 | yes |
| AN10240 | ChrVII_A_nidulans_FGSC_A4:2246392-2248098  | WT_5hasex | WT_veg | OK | 16,9131 | 29,8755 | 0,820819   | -1,54443   | 0,122485   | 0,332049   | no  |
| AN10241 | ChrVII_A_nidulans_FGSC_A4:2436908-2437910  | WT_5hasex | WT_veg | OK | 40,8662 | 95,4086 | 1,22321    | -2,42691   | 0,0152278  | 0,0723274  | no  |
| AN10242 | ChrVII_A_nidulans_FGSC_A4:1971687-1972254  | WT_5hasex | WT_veg | OK | 67,6848 | 53,0743 | -0,350819  | 0,636652   | 0,524351   | 0,765996   | no  |
| AN10243 | ChrVII_A_nidulans_FGSC_A4:2074763-2075595  | WT_5hasex | WT_veg | OK | 44,357  | 55,4299 | 0,321502   | -0,514932  | 0,6066     | 0,817212   | no  |
| AN10247 | ChrVII_A_nidulans_FGSC_A4:2135674-2138704  | WT_5hasex | WT_veg | OK | 12,2937 | 15,41   | 0,325947   | -0,623632  | 0,532869   | 0,771684   | no  |
| AN10248 | ChrVII_A_nidulans_FGSC_A4:2466932-2467877  | WT_5hasex | WT_veg | OK | 31,9111 | 122,092 | 1,93584    | -3,64045   | 0,00027216 | 0,00259683 | yes |
| AN10249 | ChrVII_A_nidulans_FGSC_A4:2483924-2484621  | WT_5hasex | WT_veg | OK | 29,8607 | 83,4998 | 1,48353    | -2,60099   | 0,00929548 | 0,0491426  | yes |
| AN1025  | ChrVIII_A_nidulans_FGSC_A4:1762758-1766255 | WT_5hasex | WT_veg | OK | 15,8662 | 28,9668 | 0,868444   | -1,6962    | 0,0898471  | 0,268873   | no  |
| AN10250 | ChrVII_A_nidulans_FGSC_A4:2528651-2530599  | WT_5hasex | WT_veg | OK | 127,648 | 318,101 | 1,31731    | -2,45961   | 0,0139088  | 0,0674693  | yes |
| AN10251 | ChrVII_A_nidulans_FGSC_A4:2511794-2513380  | WT_5hasex | WT_veg | OK | 20,277  | 55,0786 | 1,44165    | -2,75782   | 0,00581875 | 0,0336679  | yes |
| AN10252 | ChrVII_A_nidulans_FGSC_A4:2527012-2527932  | WT_5hasex | WT_veg | OK | 142,316 | 143,142 | 0,00834455 | -0,0144854 | 0,988443   | 0,995862   | no  |
| AN10253 | ChrVII_A_nidulans_FGSC_A4:2446422-2446872  | WT_5hasex | WT_veg | OK | 12,6877 | 33,1406 | 1,38516    | -1,94543   | 0,0517232  | 0,181796   | no  |
| AN10254 | ChrVII_A_nidulans_FGSC_A4:2465553-2466819  | WT_5hasex | WT_veg | OK | 5,25491 | 8,48123 | 0,690607   | -0,975118  | 0,329502   | 0,606035   | no  |
| AN10255 | ChrVII_A_nidulans_FGSC_A4:2481893-2483011  | WT_5hasex | WT_veg | OK | 58,6098 | 43,5974 | -0,4269    | 0,861968   | 0,388705   | 0,662081   | no  |
| AN10256 | ChrVII_A_nidulans_FGSC_A4:2620052-2625451  | WT_5hasex | WT_veg | OK | 6,4157  | 12,7815 | 0,994377   | -1,90125   | 0,0572699  | 0,195381   | no  |
| AN10257 | ChrVII_A_nidulans_FGSC_A4:2829002-2831424  | WT_5hasex | WT_veg | OK | 70,6445 | 92,0827 | 0,382353   | -0,793278  | 0,427616   | 0,69441    | no  |
| AN10258 | ChrVII_A_nidulans_FGSC_A4:2889408-2892165  | WT_5hasex | WT_veg | OK | 12,7484 | 16,9677 | 0,412473   | -0,800521  | 0,423409   | 0,691286   | no  |
| AN1026  | ChrVIII_A_nidulans_FGSC_A4:1760493-1761958 | WT_5hasex | WT_veg | OK | 31,2708 | 30,3605 | -0,0426221 | 0,0816298  | 0,934941   | 0,97535    | no  |
| AN10260 | ChrVII_A_nidulans_FGSC_A4:2831604-2832568  | WT_5hasex | WT_veg | OK | 112,096 | 967,556 | 3,10961    | -6,39612   | 1,5938E-10 | 6,3754E-09 | yes |
| AN10261 | ChrVII_A_nidulans_FGSC_A4:2888069-2889148  | WT_5hasex | WT_veg | OK | 121,404 | 223,733 | 0,881967   | -1,82842   | 0,0674873  | 0,219728   | no  |
| AN10262 | ChrVII_A_nidulans_FGSC_A4:2944635-2946340  | WT_5hasex | WT_veg | OK | 34,9099 | 111,891 | 1,68039    | -3,38521   | 0,00071124 | 0,00587209 | yes |
| AN10263 | ChrVII_A_nidulans_FGSC_A4:2946590-2948984  | WT_5hasex | WT_veg | OK | 23,381  | 39,8387 | 0,768832   | -1,52449   | 0,127385   | 0,340574   | no  |
| AN10264 | ChrVII_A_nidulans_FGSC_A4:2847562-2848378  | WT_5hasex | WT_veg | OK | 107,725 | 492,87  | 2,19385    | -4,50807   | 6,5419E-06 | 9,8423E-05 | yes |
| AN10265 | ChrVII_A_nidulans_FGSC_A4:3066459-3068251  | WT_5hasex | WT_veg | OK | 40,9823 | 103,842 | 1,34132    | -2,75775   | 0,00582007 | 0,03367    | yes |
| AN10266 | ChrVII_A_nidulans_FGSC_A4:3104759-3108182  | WT_5hasex | WT_veg | OK | 108,688 | 197,545 | 0,861986   | -1,70865   | 0,0875159  | 0,264034   | no  |
| AN10267 | ChrVII_A_nidulans_FGSC_A4:3117233-3119137  | WT_5hasex | WT_veg | OK | 24,6891 | 85,1931 | 1,78686    | -3,55756   | 0,00037432 | 0,00339609 | yes |
| AN10268 | ChrVII_A_nidulans_FGSC_A4:3122878-3124293  | WT_5hasex | WT_veg | OK | 29,7218 | 21,8868 | -0,441463  | 0,828521   | 0,407376   | 0,677735   | no  |
| AN10269 | ChrVII_A_nidulans_FGSC_A4:3064916-3066000  | WT_5hasex | WT_veg | OK | 35,4    | 73,6064 | 1,05608    | -1,96208   | 0,0497529  | 0,176936   | no  |

## Supplementary table 1

|         |                                            |           |        |        |          |          |               |               |            |            |      |
|---------|--------------------------------------------|-----------|--------|--------|----------|----------|---------------|---------------|------------|------------|------|
| AN1027  | ChrVIII_A_nidulans_FGSC_A4:1759014-1760208 | WT_5hasex | WT_veg | OK     | 43,6258  | 73,5735  | 0,754005      | -1,4903       | 0,136144   | 0,356053   | no   |
| AN10270 | ChrVII_A_nidulans_FGSC_A4:3119483-3120523  | WT_5hasex | WT_veg | NOTEST | 0,940496 | 0,642263 | -0,550256     | 0,357981      | 0,720357   |            | 1 no |
| AN10271 | ChrVII_A_nidulans_FGSC_A4:3121309-3122304  | WT_5hasex | WT_veg | OK     | 57,7852  | 102,428  | 0,825837      | -1,64087      | 0,100825   | 0,291131   | no   |
| AN10272 | ChrVII_A_nidulans_FGSC_A4:3128958-3129355  | WT_5hasex | WT_veg | OK     | 30,1027  | 136,603  | 2,18203       | -3,50307      | 0,00045993 | 0,00405402 | yes  |
| AN10276 | ChrVII_A_nidulans_FGSC_A4:3241466-3242327  | WT_5hasex | WT_veg | OK     | 315,704  | 582,747  | 0,884296      | -1,8239       | 0,0681668  | 0,221304   | no   |
| AN10278 | ChrVII_A_nidulans_FGSC_A4:3292826-3293946  | WT_5hasex | WT_veg | OK     | 178,469  | 249,114  | 0,481138      | -0,985209     | 0,324521   | 0,601031   | no   |
| AN10279 | ChrVII_A_nidulans_FGSC_A4:3242676-3243088  | WT_5hasex | WT_veg | OK     | 272,94   | 507,503  | 0,894834      | -1,856        | 0,0634535  | 0,210176   | no   |
| AN1028  | ChrVIII_A_nidulans_FGSC_A4:1754933-1757524 | WT_5hasex | WT_veg | OK     | 5,77091  | 9,84422  | 0,770479      | -1,25037      | 0,211165   | 0,469732   | no   |
| AN10280 | ChrVII_A_nidulans_FGSC_A4:3320646-3321254  | WT_5hasex | WT_veg | OK     | 70,125   | 159,23   | 1,18311       | -2,2924       | 0,0218823  | 0,0954144  | no   |
| AN10281 | ChrVII_A_nidulans_FGSC_A4:3318660-3320308  | WT_5hasex | WT_veg | OK     | 45,9546  | 82,227   | 0,839402      | -1,70653      | 0,0879103  | 0,26478    | no   |
| AN10282 | ChrVII_A_nidulans_FGSC_A4:3316129-3318082  | WT_5hasex | WT_veg | OK     | 47,5934  | 80,2914  | 0,754486      | -1,51707      | 0,12925    | 0,343927   | no   |
| AN10283 | ChrVII_A_nidulans_FGSC_A4:3294309-3296387  | WT_5hasex | WT_veg | OK     | 29,3301  | 41,6757  | 0,506823      | -1,01496      | 0,310127   | 0,586523   | no   |
| AN10284 | ChrVII_A_nidulans_FGSC_A4:3341321-3343085  | WT_5hasex | WT_veg | OK     | 26,0739  | 26,4017  | 0,0180236     | -0,0329652    | 0,973702   | 0,990699   | no   |
| AN10285 | ChrVII_A_nidulans_FGSC_A4:3514268-3518663  | WT_5hasex | WT_veg | OK     | 308,617  | 1200,73  | 1,96002       | -2,91694      | 0,00353487 | 0,0224363  | yes  |
| AN10286 | ChrVII_A_nidulans_FGSC_A4:3578829-3580612  | WT_5hasex | WT_veg | NOTEST | 0,827127 | 1,92805  | 1,22096       | -1,22889      | 0,219113   |            | 1 no |
| AN10287 | ChrVII_A_nidulans_FGSC_A4:3609228-3611025  | WT_5hasex | WT_veg | OK     | 3,48539  | 1,31299  | -1,40846      | 1,58614       | 0,112708   | 0,314124   | no   |
| AN10288 | ChrVII_A_nidulans_FGSC_A4:3614200-3615317  | WT_5hasex | WT_veg | OK     | 9,50989  | 81,1912  | 3,09382       | -4,98812      | 6,0971E-07 | 1,1825E-05 | yes  |
| AN10289 | ChrVII_A_nidulans_FGSC_A4:3627237-3628639  | WT_5hasex | WT_veg | NOTEST | 0,129692 | 0        | -1.79769e+308 | -1.79769e+308 | 0,165569   |            | 1 no |
| AN10290 | ChrVII_A_nidulans_FGSC_A4:3512825-3514072  | WT_5hasex | WT_veg | OK     | 48,553   | 58,607   | 0,271511      | -0,553343     | 0,580028   | 0,80106    | no   |
| AN10292 | ChrVII_A_nidulans_FGSC_A4:3574831-3578045  | WT_5hasex | WT_veg | OK     | 19,8172  | 36,4855  | 0,880567      | -1,78458      | 0,07433    | 0,235038   | no   |
| AN10293 | ChrVII_A_nidulans_FGSC_A4:3611239-3612698  | WT_5hasex | WT_veg | OK     | 12,4287  | 9,00221  | -0,465327     | 0,781161      | 0,434708   | 0,700263   | no   |
| AN10294 | ChrVII_A_nidulans_FGSC_A4:3615893-3617246  | WT_5hasex | WT_veg | OK     | 3,09003  | 3,19505  | 0,0482148     | -0,0595552    | 0,95251    | 0,982354   | no   |
| AN10295 | ChrVII_A_nidulans_FGSC_A4:3629380-3630929  | WT_5hasex | WT_veg | OK     | 12,243   | 20,4311  | 0,738809      | -1,28424      | 0,199058   | 0,453109   | no   |
| AN10296 | ChrVII_A_nidulans_FGSC_A4:3671440-3673028  | WT_5hasex | WT_veg | OK     | 996,369  | 220,621  | -2,17511      | 3,28146       | 0,00103271 | 0,00806979 | yes  |
| AN10297 | ChrVII_A_nidulans_FGSC_A4:3813028-3816304  | WT_5hasex | WT_veg | OK     | 11,5409  | 11,7073  | 0,0206539     | -0,0363184    | 0,971028   | 0,989419   | no   |
| AN10298 | ChrVII_A_nidulans_FGSC_A4:3834635-3836415  | WT_5hasex | WT_veg | OK     | 75,0334  | 59,0248  | -0,346212     | 0,661395      | 0,508359   | 0,755161   | no   |
| AN10299 | ChrVII_A_nidulans_FGSC_A4:3673638-3675345  | WT_5hasex | WT_veg | OK     | 56,9426  | 32,8342  | -0,79431      | 1,58241       | 0,113555   | 0,315778   | no   |
| AN1030  | ChrVIII_A_nidulans_FGSC_A4:1749412-1750630 | WT_5hasex | WT_veg | NOTEST | 0,205694 | 0        | -1.79769e+308 | -1.79769e+308 | 0,224063   |            | 1 no |
| AN10300 | ChrVII_A_nidulans_FGSC_A4:3810617-3812626  | WT_5hasex | WT_veg | OK     | 1,76245  | 4,38134  | 1,31379       | -1,70123      | 0,0888998  | 0,266867   | no   |
| AN10301 | ChrVII_A_nidulans_FGSC_A4:3836839-3837973  | WT_5hasex | WT_veg | OK     | 50,9201  | 99,8046  | 0,970872      | -1,89399      | 0,0582264  | 0,197815   | no   |
| AN10302 | ChrVII_A_nidulans_FGSC_A4:3887614-3891969  | WT_5hasex | WT_veg | NOTEST | 0,232357 | 0,139625 | -0,734783     | 0,473505      | 0,635853   |            | 1 no |
| AN10303 | ChrVII_A_nidulans_FGSC_A4:3926125-3927658  | WT_5hasex | WT_veg | OK     | 85,7093  | 477,76   | 2,47876       | -5,14239      | 2,7127E-07 | 5,7296E-06 | yes  |
| AN10304 | ChrVII_A_nidulans_FGSC_A4:3970866-3972287  | WT_5hasex | WT_veg | OK     | 13,6257  | 23,8042  | 0,804889      | -1,3959       | 0,162743   | 0,399254   | no   |
| AN10305 | ChrVII_A_nidulans_FGSC_A4:3987685-3988401  | WT_5hasex | WT_veg | OK     | 13,5955  | 27,3577  | 1,00881       | -1,43028      | 0,152638   | 0,383603   | no   |
| AN10307 | ChrVII_A_nidulans_FGSC_A4:3922973-3925911  | WT_5hasex | WT_veg | OK     | 17,3717  | 34,7423  | 0,999956      | -1,9816       | 0,0475238  | 0,171485   | no   |
| AN10308 | ChrVII_A_nidulans_FGSC_A4:3973587-3974812  | WT_5hasex | WT_veg | OK     | 28,1415  | 30,4052  | 0,11162       | -0,207701     | 0,835462   | 0,934589   | no   |
| AN10309 | ChrVII_A_nidulans_FGSC_A4:4018526-4020321  | WT_5hasex | WT_veg | OK     | 21,9899  | 51,7338  | 1,23427       | -2,37715      | 0,017447   | 0,0802546  | no   |
| AN10310 | ChrVII_A_nidulans_FGSC_A4:4044795-4045109  | WT_5hasex | WT_veg | OK     | 27,3818  | 66,3414  | 1,2767        | -1,92663      | 0,0540251  | 0,187423   | no   |
| AN10313 | ChrVII_A_nidulans_FGSC_A4:4098938-4099396  | WT_5hasex | WT_veg | OK     | 10,5161  | 29,5887  | 1,49245       | -1,94225      | 0,0521063  | 0,182677   | no   |
| AN10315 | ChrVII_A_nidulans_FGSC_A4:4190834-4192983  | WT_5hasex | WT_veg | OK     | 46,3589  | 43,6274  | -0,0876112    | 0,179037      | 0,857909   | 0,944754   | no   |
| AN10316 | ChrVII_A_nidulans_FGSC_A4:4193344-4197753  | WT_5hasex | WT_veg | OK     | 9,88221  | 28,142   | 1,50982       | -3,04536      | 0,00232399 | 0,0158138  | yes  |
| AN10317 | ChrVII_A_nidulans_FGSC_A4:4230380-4232082  | WT_5hasex | WT_veg | OK     | 50,3105  | 92,2091  | 0,874048      | -1,7293       | 0,083755   | 0,256049   | no   |
| AN10318 | ChrVII_A_nidulans_FGSC_A4:4262186-4262942  | WT_5hasex | WT_veg | OK     | 98,5361  | 89,8662  | -0,132874     | 0,230927      | 0,817371   | 0,926877   | no   |
| AN10319 | ChrVII_A_nidulans_FGSC_A4:4334647-4336420  | WT_5hasex | WT_veg | OK     | 9,62107  | 14,0637  | 0,547708      | -0,884561     | 0,376393   | 0,651094   | no   |
| AN10320 | ChrVII_A_nidulans_FGSC_A4:4337588-4338365  | WT_5hasex | WT_veg | OK     | 2,76986  | 2,44393  | -0,180606     | 0,162976      | 0,870537   | 0,950537   | no   |
| AN10321 | ChrVII_A_nidulans_FGSC_A4:4419140-4420783  | WT_5hasex | WT_veg | OK     | 3,03343  | 6,0987   | 1,00755       | -1,31499      | 0,188513   | 0,438539   | no   |
| AN10322 | ChrVII_A_nidulans_FGSC_A4:4232400-4233746  | WT_5hasex | WT_veg | OK     | 3,31875  | 1,774    | -0,90363      | 0,957312      | 0,33841    | 0,614363   | no   |
| AN10323 | ChrVII_A_nidulans_FGSC_A4:4263046-4264294  | WT_5hasex | WT_veg | OK     | 9,92967  | 19,014   | 0,937248      | -1,51663      | 0,129359   | 0,344131   | no   |
| AN10324 | ChrVII_A_nidulans_FGSC_A4:4227640-4228588  | WT_5hasex | WT_veg | OK     | 107,887  | 163,229  | 0,597372      | -1,21554      | 0,22416    | 0,486093   | no   |
| AN10325 | ChrVII_A_nidulans_FGSC_A4:4331814-4334118  | WT_5hasex | WT_veg | NOTEST | 2,02844  | 0,441685 | -2,19928      | 1,73065       | 0,0835146  |            | 1 no |
| AN10326 | ChrVII_A_nidulans_FGSC_A4:4339838-4340375  | WT_5hasex | WT_veg | NOTEST | 0,823182 | 1,24989  | 0,602524      | -0,334525     | 0,737983   |            | 1 no |
| AN10327 | ChrVII_A_nidulans_FGSC_A4:4421540-4422939  | WT_5hasex | WT_veg | OK     | 52,4517  | 217,41   | 2,05136       | -4,03371      | 5,4904E-05 | 0,00064961 | yes  |
| AN10328 | ChrVI_A_nidulans_FGSC_A4:3395873-3399926   | WT_5hasex | WT_veg | NOTEST | 0        | 0        | 0             | 0             | 1          |            | 1 no |

## Supplementary table 1

|         |                                            |           |        |        |          |          |               |               |            |            |      |
|---------|--------------------------------------------|-----------|--------|--------|----------|----------|---------------|---------------|------------|------------|------|
| AN10329 | ChrVI_A_nidulans_FGSC_A4:3344059-3345154   | WT_5hasex | WT_veg | OK     | 13,9297  | 30,5407  | 1,13257       | -1,91847      | 0,055052   | 0,189904   | no   |
| AN10331 | ChrVI_A_nidulans_FGSC_A4:3285054-3287296   | WT_5hasex | WT_veg | OK     | 2,03562  | 3,36622  | 0,725661      | -0,970289     | 0,331903   | 0,608214   | no   |
| AN10332 | ChrVI_A_nidulans_FGSC_A4:3287643-3289137   | WT_5hasex | WT_veg | OK     | 2,56936  | 2,94084  | 0,194817      | -0,223196     | 0,823383   | 0,929481   | no   |
| AN10333 | ChrVI_A_nidulans_FGSC_A4:3133240-3135502   | WT_5hasex | WT_veg | NOTEST | 0,99855  | 3,25865  | 1,70637       | -1,94531      | 0,0517372  |            | 1 no |
| AN10334 | ChrVI_A_nidulans_FGSC_A4:3130825-3132740   | WT_5hasex | WT_veg | OK     | 12,6192  | 23,0217  | 0,867377      | -1,59366      | 0,111013   | 0,311152   | no   |
| AN10335 | ChrVI_A_nidulans_FGSC_A4:2912415-2913822   | WT_5hasex | WT_veg | OK     | 13,8737  | 22,0538  | 0,668675      | -1,14807      | 0,250942   | 0,519592   | no   |
| AN10336 | ChrVI_A_nidulans_FGSC_A4:2892986-2894515   | WT_5hasex | WT_veg | OK     | 49,1345  | 164,213  | 1,74076       | -3,60969      | 0,00030657 | 0,00287382 | yes  |
| AN10337 | ChrVI_A_nidulans_FGSC_A4:2862164-2864640   | WT_5hasex | WT_veg | OK     | 257,659  | 418,561  | 0,699975      | -1,30698      | 0,191218   | 0,442218   | no   |
| AN10338 | ChrVI_A_nidulans_FGSC_A4:2914483-2915925   | WT_5hasex | WT_veg | OK     | 34,9393  | 68,3189  | 0,967433      | -1,94219      | 0,0521142  | 0,18268    | no   |
| AN10339 | ChrVI_A_nidulans_FGSC_A4:2895071-2896600   | WT_5hasex | WT_veg | OK     | 19,2335  | 36,8147  | 0,936661      | -1,74576      | 0,0808531  | 0,24955    | no   |
| AN10340 | ChrVI_A_nidulans_FGSC_A4:2864837-2866489   | WT_5hasex | WT_veg | OK     | 42,467   | 179,884  | 2,08265       | -4,29937      | 1,7128E-05 | 0,00023332 | yes  |
| AN10341 | ChrVI_A_nidulans_FGSC_A4:2960205-2965474   | WT_5hasex | WT_veg | OK     | 10,5388  | 28,721   | 1,4464        | -2,77507      | 0,00551901 | 0,0322165  | yes  |
| AN10343 | ChrVI_A_nidulans_FGSC_A4:2739606-2741667   | WT_5hasex | WT_veg | NOTEST | 0,554397 | 0,950491 | 0,777754      | -0,719118     | 0,472068   |            | 1 no |
| AN10344 | ChrVI_A_nidulans_FGSC_A4:2736700-2738614   | WT_5hasex | WT_veg | NOTEST | 0,425543 | 0        | -1.79769e+308 | -1.79769e+308 | 0,0908325  |            | 1 no |
| AN10346 | ChrVI_A_nidulans_FGSC_A4:2649844-2650680   | WT_5hasex | WT_veg | OK     | 4,03126  | 2,56461  | -0,652493     | 0,574057      | 0,565929   | 0,792746   | no   |
| AN10347 | ChrVI_A_nidulans_FGSC_A4:2612644-2613848   | WT_5hasex | WT_veg | OK     | 17,5042  | 43,9196  | 1,32716       | -2,34708      | 0,0189211  | 0,0853124  | no   |
| AN10348 | ChrVI_A_nidulans_FGSC_A4:2561864-2562538   | WT_5hasex | WT_veg | OK     | 43,1833  | 56,4092  | 0,385457      | -0,707752     | 0,479099   | 0,734413   | no   |
| AN10349 | ChrVI_A_nidulans_FGSC_A4:2357613-2359270   | WT_5hasex | WT_veg | OK     | 32,5986  | 89,4992  | 1,45707       | -2,94392      | 0,00324079 | 0,0208399  | yes  |
| AN10350 | ChrVI_A_nidulans_FGSC_A4:2303666-2306927   | WT_5hasex | WT_veg | OK     | 125,892  | 686,285  | 2,44663       | -4,62028      | 3,8323E-06 | 6,0946E-05 | yes  |
| AN10351 | ChrVI_A_nidulans_FGSC_A4:2222964-2224770   | WT_5hasex | WT_veg | OK     | 81,122   | 106,826  | 0,397096      | -0,805651     | 0,420444   | 0,688633   | no   |
| AN10352 | ChrVI_A_nidulans_FGSC_A4:1946667-1948618   | WT_5hasex | WT_veg | OK     | 99,9624  | 517,906  | 2,37323       | -4,57379      | 4,7897E-06 | 7,4412E-05 | yes  |
| AN10354 | ChrVI_A_nidulans_FGSC_A4:1743835-1744735   | WT_5hasex | WT_veg | OK     | 86,1821  | 94,6048  | 0,134526      | -0,267812     | 0,788844   | 0,913844   | no   |
| AN10355 | ChrVI_A_nidulans_FGSC_A4:1736041-1738579   | WT_5hasex | WT_veg | OK     | 31,5601  | 60,8955  | 0,948232      | -1,88326      | 0,0596645  | 0,201444   | no   |
| AN10356 | ChrVI_A_nidulans_FGSC_A4:1711425-1713182   | WT_5hasex | WT_veg | OK     | 375,941  | 1484,34  | 1,98124       | -3,35941      | 0,00078109 | 0,00636063 | yes  |
| AN10357 | ChrVI_A_nidulans_FGSC_A4:1672732-1674115   | WT_5hasex | WT_veg | OK     | 79,58    | 186,931  | 1,23203       | -2,52118      | 0,0116961  | 0,0589496  | no   |
| AN10358 | ChrVI_A_nidulans_FGSC_A4:2678089-2679366   | WT_5hasex | WT_veg | OK     | 0,722725 | 7,61328  | 3,397         | -3,29985      | 0,00096737 | 0,00763567 | yes  |
| AN10359 | ChrVI_A_nidulans_FGSC_A4:2611021-2612232   | WT_5hasex | WT_veg | OK     | 5,94808  | 12,2113  | 1,03773       | -1,50829      | 0,131479   | 0,347793   | no   |
| AN10360 | ChrVI_A_nidulans_FGSC_A4:2307402-2308465   | WT_5hasex | WT_veg | OK     | 25,9676  | 55,5659  | 1,09749       | -1,97942      | 0,0477687  | 0,172167   | no   |
| AN10361 | ChrVI_A_nidulans_FGSC_A4:2308700-2310365   | WT_5hasex | WT_veg | OK     | 97,0111  | 176,584  | 0,864134      | -1,64428      | 0,100118   | 0,289599   | no   |
| AN10362 | ChrVI_A_nidulans_FGSC_A4:2310645-2311803   | WT_5hasex | WT_veg | OK     | 64,7545  | 122,252  | 0,916804      | -1,7972       | 0,0723043  | 0,230748   | no   |
| AN10363 | ChrVI_A_nidulans_FGSC_A4:2221512-2222688   | WT_5hasex | WT_veg | OK     | 53,8504  | 82,0007  | 0,606678      | -1,23889      | 0,215384   | 0,475179   | no   |
| AN10364 | ChrVI_A_nidulans_FGSC_A4:1948895-1949726   | WT_5hasex | WT_veg | OK     | 26,6379  | 59,31    | 1,1548        | -2,05908      | 0,039487   | 0,149444   | no   |
| AN10365 | ChrVI_A_nidulans_FGSC_A4:1743002-1743614   | WT_5hasex | WT_veg | OK     | 88,3085  | 142,426  | 0,689587      | -1,36431      | 0,172471   | 0,414859   | no   |
| AN10366 | ChrVI_A_nidulans_FGSC_A4:1710186-1710984   | WT_5hasex | WT_veg | NOTEST | 1,82836  | 1,84021  | 0,00932332    | -0,00825714   | 0,993412   |            | 1 no |
| AN10367 | ChrVI_A_nidulans_FGSC_A4:1674870-1678693   | WT_5hasex | WT_veg | OK     | 34,5406  | 73,3247  | 1,08601       | -2,26393      | 0,0235785  | 0,100878   | no   |
| AN10368 | ChrVI_A_nidulans_FGSC_A4:2644749-2645236   | WT_5hasex | WT_veg | OK     | 44,2032  | 319,565  | 2,85389       | -4,80347      | 1,5594E-06 | 2,7476E-05 | yes  |
| AN10369 | ChrVI_A_nidulans_FGSC_A4:2135165-2136583   | WT_5hasex | WT_veg | NOTEST | 0,77323  | 0,814054 | 0,0742263     | -0,0486258    | 0,961218   |            | 1 no |
| AN10370 | ChrVI_A_nidulans_FGSC_A4:2239730-2241306   | WT_5hasex | WT_veg | OK     | 158,928  | 640,762  | 2,01142       | -3,89539      | 9,804E-05  | 0,00107681 | yes  |
| AN10371 | ChrVI_A_nidulans_FGSC_A4:2250046-2250525   | WT_5hasex | WT_veg | OK     | 111,159  | 896,429  | 3,01156       | -5,65509      | 1,5577E-08 | 4,3164E-07 | yes  |
| AN10372 | ChrVI_A_nidulans_FGSC_A4:2650805-2651998   | WT_5hasex | WT_veg | OK     | 3,07404  | 0        | -1.79769e+308 | -1.79769e+308 | 0,0138366  | 0,0672042  | no   |
| AN10373 | ChrVI_A_nidulans_FGSC_A4:2559629-2561523   | WT_5hasex | WT_veg | OK     | 63,3894  | 86,9876  | 0,456568      | -0,947014     | 0,343632   | 0,61901    | no   |
| AN10374 | ChrVI_A_nidulans_FGSC_A4:2356975-2357350   | WT_5hasex | WT_veg | OK     | 105,828  | 325,889  | 1,62266       | -3,03406      | 0,00241285 | 0,0163315  | yes  |
| AN10375 | ChrVI_A_nidulans_FGSC_A4:1806348-1807857   | WT_5hasex | WT_veg | OK     | 3,42045  | 6,44068  | 0,913027      | -1,25086      | 0,210987   | 0,469556   | no   |
| AN10377 | ChrVI_A_nidulans_FGSC_A4:1739018-1740690   | WT_5hasex | WT_veg | OK     | 64,4539  | 392,825  | 2,60755       | -5,41232      | 6,2214E-08 | 1,5227E-06 | yes  |
| AN10378 | ChrVI_A_nidulans_FGSC_A4:1536416-1538238   | WT_5hasex | WT_veg | OK     | 128,558  | 230,828  | 0,844396      | -1,68598      | 0,0917988  | 0,27267    | no   |
| AN10379 | ChrVI_A_nidulans_FGSC_A4:1524782-1526142   | WT_5hasex | WT_veg | OK     | 35,8139  | 109,589  | 1,61352       | -3,14105      | 0,00168341 | 0,0120924  | yes  |
| AN1038  | ChrVIII_A_nidulans_FGSC_A4:1712076-1716591 | WT_5hasex | WT_veg | OK     | 31,669   | 40,6031  | 0,35852       | -0,738474     | 0,460226   | 0,720367   | no   |
| AN10381 | ChrVI_A_nidulans_FGSC_A4:1526199-1527621   | WT_5hasex | WT_veg | OK     | 16,0368  | 4,08821  | -1,97184      | 3,08953       | 0,00200477 | 0,0139941  | yes  |
| AN10382 | ChrVI_A_nidulans_FGSC_A4:1585705-1587419   | WT_5hasex | WT_veg | OK     | 24,7911  | 54,6327  | 1,13994       | -2,27483      | 0,0229163  | 0,0987226  | no   |
| AN10383 | ChrVI_A_nidulans_FGSC_A4:1503886-1506040   | WT_5hasex | WT_veg | OK     | 5,29428  | 5,91633  | 0,160268      | -0,176242     | 0,860104   | 0,94586    | no   |
| AN10384 | ChrVI_A_nidulans_FGSC_A4:1506181-1508300   | WT_5hasex | WT_veg | NOTEST | 1,70698  | 1,52694  | -0,160797     | 0,166612      | 0,867675   |            | 1 no |
| AN10385 | ChrVI_A_nidulans_FGSC_A4:1472128-1473430   | WT_5hasex | WT_veg | NOTEST | 0,858068 | 0,822602 | -0,0608985    | 0,0483079     | 0,961471   |            | 1 no |
| AN10386 | ChrVI_A_nidulans_FGSC_A4:1468832-1471226   | WT_5hasex | WT_veg | NOTEST | 0,56483  | 0,771166 | 0,449224      | -0,39158      | 0,695369   |            | 1 no |

## Supplementary table 1

|         |                                            |           |        |        |           |          |               |               |            |            |      |
|---------|--------------------------------------------|-----------|--------|--------|-----------|----------|---------------|---------------|------------|------------|------|
| AN10387 | ChrVI_A_nidulans_FGSC_A4:1284412-1286023   | WT_5hasex | WT_veg | OK     | 2,38898   | 0,628173 | -1,92716      | 1,3516        | 0,176504   | 0,42115    | no   |
| AN10388 | ChrVI_A_nidulans_FGSC_A4:1281543-1282959   | WT_5hasex | WT_veg | NOTEST | 0,780983  | 1,72526  | 1,14345       | -1,13267      | 0,257351   |            | 1 no |
| AN1039  | ChrVIII_A_nidulans_FGSC_A4:1707150-1711498 | WT_5hasex | WT_veg | OK     | 19,1967   | 54,8743  | 1,51527       | -3,09696      | 0,00195517 | 0,01371    | yes  |
| AN10390 | ChrVI_A_nidulans_FGSC_A4:1220220-1222311   | WT_5hasex | WT_veg | NOTEST | 1,35866   | 1,51267  | 0,154913      | -0,151649     | 0,879464   |            | 1 no |
| AN10391 | ChrVI_A_nidulans_FGSC_A4:1125597-1127513   | WT_5hasex | WT_veg | OK     | 5,39487   | 30,1176  | 2,48095       | -3,64862      | 0,00026365 | 0,00253087 | yes  |
| AN10392 | ChrVI_A_nidulans_FGSC_A4:1004510-1006054   | WT_5hasex | WT_veg | OK     | 32,6215   | 66,3037  | 1,02327       | -1,84641      | 0,0648332  | 0,213592   | no   |
| AN10393 | ChrVI_A_nidulans_FGSC_A4:959574-962577     | WT_5hasex | WT_veg | OK     | 20,1408   | 26,8763  | 0,416217      | -0,838376     | 0,401819   | 0,673327   | no   |
| AN10394 | ChrVI_A_nidulans_FGSC_A4:951180-951603     | WT_5hasex | WT_veg | OK     | 12,1564   | 12,3245  | 0,0198119     | -0,0230035    | 0,981647   | 0,993423   | no   |
| AN10395 | ChrVI_A_nidulans_FGSC_A4:949750-950962     | WT_5hasex | WT_veg | OK     | 88,0058   | 62,6741  | -0,48973      | 0,983467      | 0,325377   | 0,602052   | no   |
| AN10396 | ChrVI_A_nidulans_FGSC_A4:918676-920629     | WT_5hasex | WT_veg | OK     | 124,922   | 238,499  | 0,93295       | -1,86632      | 0,0619965  | 0,206729   | no   |
| AN10397 | ChrVI_A_nidulans_FGSC_A4:1123911-1125003   | WT_5hasex | WT_veg | OK     | 4,10829   | 21,3119  | 2,37505       | -3,03284      | 0,00242264 | 0,0163872  | yes  |
| AN10398 | ChrVI_A_nidulans_FGSC_A4:1119809-1121372   | WT_5hasex | WT_veg | OK     | 6,46688   | 53,9789  | 3,06125       | -4,22577      | 2,3813E-05 | 0,00031118 | yes  |
| AN10399 | ChrVI_A_nidulans_FGSC_A4:1002818-1004140   | WT_5hasex | WT_veg | OK     | 186,66    | 713,681  | 1,93487       | -3,4908       | 0,00048159 | 0,00421232 | yes  |
| AN1040  | ChrVIII_A_nidulans_FGSC_A4:1703760-1704601 | WT_5hasex | WT_veg | OK     | 5,75508   | 20,5889  | 1,83896       | -2,35219      | 0,0186633  | 0,0843971  | no   |
| AN10400 | ChrVI_A_nidulans_FGSC_A4:947111-949463     | WT_5hasex | WT_veg | OK     | 58,687    | 71,3305  | 0,281478      | -0,582639     | 0,560136   | 0,789075   | no   |
| AN10401 | ChrVI_A_nidulans_FGSC_A4:917549-918210     | WT_5hasex | WT_veg | OK     | 10,9897   | 10,7653  | -0,0297607    | 0,0396789     | 0,968349   | 0,988483   | no   |
| AN10402 | ChrVI_A_nidulans_FGSC_A4:1259125-1260820   | WT_5hasex | WT_veg | OK     | 2,58085   | 2,01945  | -0,353885     | 0,397451      | 0,691035   | 0,864193   | no   |
| AN10403 | ChrVI_A_nidulans_FGSC_A4:1219443-1220043   | WT_5hasex | WT_veg | OK     | 11,5975   | 15,4819  | 0,416777      | -0,595413     | 0,551568   | 0,783066   | no   |
| AN10404 | ChrVI_A_nidulans_FGSC_A4:957648-959247     | WT_5hasex | WT_veg | OK     | 34,4622   | 21,4618  | -0,683245     | 1,36903       | 0,170991   | 0,412459   | no   |
| AN10405 | ChrVI_A_nidulans_FGSC_A4:951915-953016     | WT_5hasex | WT_veg | OK     | 93,2779   | 74,2234  | -0,32966      | 0,682125      | 0,49516    | 0,746256   | no   |
| AN10406 | ChrVI_A_nidulans_FGSC_A4:759691-760909     | WT_5hasex | WT_veg | OK     | 20,2671   | 31,2997  | 0,627007      | -1,14616      | 0,251729   | 0,52042    | no   |
| AN10407 | ChrVI_A_nidulans_FGSC_A4:749505-752418     | WT_5hasex | WT_veg | OK     | 192,273   | 310,96   | 0,693569      | -1,29992      | 0,19363    | 0,445434   | no   |
| AN10408 | ChrVI_A_nidulans_FGSC_A4:757929-759166     | WT_5hasex | WT_veg | OK     | 24,7327   | 66,8754  | 1,43505       | -2,70324      | 0,00686679 | 0,0385485  | yes  |
| AN10409 | ChrVI_A_nidulans_FGSC_A4:753603-755951     | WT_5hasex | WT_veg | OK     | 29,1346   | 100,345  | 1,78416       | -3,70001      | 0,00021559 | 0,00212353 | yes  |
| AN1041  | ChrVIII_A_nidulans_FGSC_A4:1699971-1701475 | WT_5hasex | WT_veg | OK     | 45,1518   | 31,4696  | -0,520823     | 1,04422       | 0,296384   | 0,571501   | no   |
| AN10410 | ChrVI_A_nidulans_FGSC_A4:712878-714337     | WT_5hasex | WT_veg | OK     | 3,67356   | 15,4964  | 2,07668       | -2,95866      | 0,00308977 | 0,0200334  | yes  |
| AN10411 | ChrVI_A_nidulans_FGSC_A4:714556-715828     | WT_5hasex | WT_veg | OK     | 51,8335   | 88,1013  | 0,765277      | -1,54609      | 0,122082   | 0,331489   | no   |
| AN10413 | ChrVI_A_nidulans_FGSC_A4:700220-705686     | WT_5hasex | WT_veg | OK     | 13,8836   | 21,2876  | 0,616631      | -1,24339      | 0,213723   | 0,473033   | no   |
| AN10414 | ChrVI_A_nidulans_FGSC_A4:693741-696717     | WT_5hasex | WT_veg | OK     | 8,76083   | 16,4853  | 0,912037      | -1,64587      | 0,0997911  | 0,288861   | no   |
| AN10415 | ChrVI_A_nidulans_FGSC_A4:647567-651942     | WT_5hasex | WT_veg | OK     | 44,0538   | 87,9162  | 0,996863      | -2,02717      | 0,0426446  | 0,158027   | no   |
| AN10416 | ChrVI_A_nidulans_FGSC_A4:696949-698148     | WT_5hasex | WT_veg | OK     | 1637,23   | 2153,56  | 0,395471      | -0,649847     | 0,515791   | 0,760231   | no   |
| AN10417 | ChrVI_A_nidulans_FGSC_A4:645101-646908     | WT_5hasex | WT_veg | OK     | 17,5614   | 64,2695  | 1,87173       | -3,56204      | 0,00036799 | 0,00334665 | yes  |
| AN10418 | ChrVI_A_nidulans_FGSC_A4:698261-699641     | WT_5hasex | WT_veg | OK     | 35,2288   | 56,9245  | 0,692296      | -1,35863      | 0,174265   | 0,417894   | no   |
| AN10419 | ChrII_A_nidulans_FGSC_A4:3942212-3943031   | WT_5hasex | WT_veg | OK     | 4,45035   | 4,12656  | -0,108978     | 0,124789      | 0,900691   | 0,961811   | no   |
| AN1042  | ChrVIII_A_nidulans_FGSC_A4:1698897-1699725 | WT_5hasex | WT_veg | NOTEST | 0,419541  | 1,48905  | 1,82751       | -0,803889     | 0,421461   |            | 1 no |
| AN10421 | ChrII_A_nidulans_FGSC_A4:3940539-3941836   | WT_5hasex | WT_veg | OK     | 21,2037   | 90,5912  | 2,09506       | -3,70151      | 0,00021432 | 0,00211419 | yes  |
| AN10422 | ChrII_A_nidulans_FGSC_A4:3939512-3940018   | WT_5hasex | WT_veg | OK     | 154,399   | 549,762  | 1,83214       | -3,54228      | 0,00039668 | 0,00356856 | yes  |
| AN10423 | ChrII_A_nidulans_FGSC_A4:3923387-3925066   | WT_5hasex | WT_veg | NOTEST | 0,768216  | 1,15181  | 0,584319      | -0,540816     | 0,588634   |            | 1 no |
| AN10424 | ChrII_A_nidulans_FGSC_A4:3881258-3883368   | WT_5hasex | WT_veg | OK     | 16,8056   | 101,889  | 2,59998       | -4,14296      | 3,4286E-05 | 0,00043116 | yes  |
| AN10425 | ChrII_A_nidulans_FGSC_A4:3830772-3832182   | WT_5hasex | WT_veg | OK     | 11,0536   | 30,942   | 1,48505       | -2,46945      | 0,013532   | 0,066031   | no   |
| AN10426 | ChrII_A_nidulans_FGSC_A4:3883472-3885170   | WT_5hasex | WT_veg | OK     | 9,86736   | 56,5632  | 2,51913       | -3,63031      | 0,00028308 | 0,00268638 | yes  |
| AN10428 | ChrII_A_nidulans_FGSC_A4:3728127-3729873   | WT_5hasex | WT_veg | NOTEST | 0         | 0        | 0             | 0             | 1          |            | 1 no |
| AN10429 | ChrII_A_nidulans_FGSC_A4:3639113-3640141   | WT_5hasex | WT_veg | OK     | 75,3713   | 127,721  | 0,760908      | -1,54507      | 0,122329   | 0,331849   | no   |
| AN1043  | ChrVIII_A_nidulans_FGSC_A4:1696710-1698226 | WT_5hasex | WT_veg | NOTEST | 0         | 0        | 0             | 0             | 1          |            | 1 no |
| AN10430 | ChrII_A_nidulans_FGSC_A4:3614405-3620357   | WT_5hasex | WT_veg | NOTEST | 0,0394718 | 0        | -1.79769e+308 | -1.79769e+308 | 0,23809    |            | 1 no |
| AN10431 | ChrII_A_nidulans_FGSC_A4:3580962-3582128   | WT_5hasex | WT_veg | NOTEST | 0,223655  | 0,764328 | 1,77292       | -0,779876     | 0,435464   |            | 1 no |
| AN10432 | ChrII_A_nidulans_FGSC_A4:3576688-3578605   | WT_5hasex | WT_veg | OK     | 1,95643   | 7,97557  | 2,02736       | -2,56699      | 0,0102587  | 0,0531569  | no   |
| AN10433 | ChrII_A_nidulans_FGSC_A4:3500874-3502266   | WT_5hasex | WT_veg | OK     | 21,3639   | 46,6416  | 1,12644       | -2,04893      | 0,0404692  | 0,152117   | no   |
| AN10434 | ChrII_A_nidulans_FGSC_A4:3461892-3464661   | WT_5hasex | WT_veg | OK     | 13,8819   | 24,6102  | 0,826049      | -1,59611      | 0,110465   | 0,310147   | no   |
| AN10436 | ChrII_A_nidulans_FGSC_A4:3389836-3391695   | WT_5hasex | WT_veg | OK     | 42,8561   | 128,677  | 1,58619       | -3,27399      | 0,00106042 | 0,00824207 | yes  |
| AN10437 | ChrII_A_nidulans_FGSC_A4:3379147-3380445   | WT_5hasex | WT_veg | OK     | 32,9874   | 46,3448  | 0,490492      | -0,938656     | 0,347907   | 0,623603   | no   |
| AN10438 | ChrII_A_nidulans_FGSC_A4:3323260-3325257   | WT_5hasex | WT_veg | OK     | 10,55     | 73,1995  | 2,79459       | -5,03123      | 4,8734E-07 | 9,6514E-06 | yes  |
| AN10439 | ChrII_A_nidulans_FGSC_A4:3295835-3297934   | WT_5hasex | WT_veg | OK     | 24,4683   | 31,6494  | 0,37126       | -0,739917     | 0,45935    | 0,719678   | no   |

## Supplementary table 1

|         |                                             |           |        |        |          |         |               |               |            |            |     |
|---------|---------------------------------------------|-----------|--------|--------|----------|---------|---------------|---------------|------------|------------|-----|
| AN10440 | ChrII_A_nidulans_FGSC_A4:3290276-3291986    | WT_5hasex | WT_veg | OK     | 205,102  | 331,323 | 0,691895      | -1,40332      | 0,160521   | 0,396084   | no  |
| AN10441 | ChrII_A_nidulans_FGSC_A4:3272278-3274568    | WT_5hasex | WT_veg | OK     | 17,2423  | 67,3577 | 1,96589       | -3,81308      | 0,00013725 | 0,00144416 | yes |
| AN10442 | ChrII_A_nidulans_FGSC_A4:3161757-3167587    | WT_5hasex | WT_veg | OK     | 19,3113  | 28,2107 | 0,546798      | -1,09716      | 0,272571   | 0,54511    | no  |
| AN10443 | ChrII_A_nidulans_FGSC_A4:3117398-3119722    | WT_5hasex | WT_veg | OK     | 15,3173  | 30,4385 | 0,990739      | -1,93234      | 0,0533177  | 0,185676   | no  |
| AN10444 | ChrII_A_nidulans_FGSC_A4:3114639-3116712    | WT_5hasex | WT_veg | OK     | 58,7505  | 145,05  | 1,30388       | -2,25561      | 0,024095   | 0,102502   | no  |
| AN10445 | ChrII_A_nidulans_FGSC_A4:3096851-3099236    | WT_5hasex | WT_veg | OK     | 53,5402  | 103,308 | 0,948251      | -1,86342      | 0,0624027  | 0,207739   | no  |
| AN10446 | ChrII_A_nidulans_FGSC_A4:3637022-3638926    | WT_5hasex | WT_veg | OK     | 72,4928  | 95,2738 | 0,394242      | -0,816253     | 0,414356   | 0,68353    | no  |
| AN10447 | ChrII_A_nidulans_FGSC_A4:3620971-3623045    | WT_5hasex | WT_veg | NOTEST | 0,552825 | 2,46937 | 2,15925       | -2,18458      | 0,0289194  | 1          | no  |
| AN10449 | ChrII_A_nidulans_FGSC_A4:3498937-3500689    | WT_5hasex | WT_veg | OK     | 55,0212  | 164,482 | 1,57987       | -3,25812      | 0,00112151 | 0,00863748 | yes |
| AN1045  | ChrVIII_A_nidulans_FGSC_A4:1690400-1692003  | WT_5hasex | WT_veg | OK     | 37,5     | 91,9149 | 1,29341       | -2,61115      | 0,00902384 | 0,0480458  | yes |
| AN10450 | ChrII_A_nidulans_FGSC_A4:3496671-3498423    | WT_5hasex | WT_veg | OK     | 8,99906  | 22,4448 | 1,31853       | -2,21765      | 0,026579   | 0,110548   | no  |
| AN10451 | ChrII_A_nidulans_FGSC_A4:3465706-3466919    | WT_5hasex | WT_veg | OK     | 18,5     | 85,2515 | 2,2042        | -3,89978      | 9,6279E-05 | 0,0010604  | yes |
| AN10452 | ChrII_A_nidulans_FGSC_A4:3458466-3459675    | WT_5hasex | WT_veg | OK     | 89,8257  | 331,873 | 1,88543       | -3,93939      | 8,1688E-05 | 0,00091839 | yes |
| AN10453 | ChrII_A_nidulans_FGSC_A4:3380723-3382458    | WT_5hasex | WT_veg | OK     | 30,6415  | 68,4984 | 1,16058       | -2,29189      | 0,0219122  | 0,095496   | no  |
| AN10454 | ChrII_A_nidulans_FGSC_A4:3322033-3323046    | WT_5hasex | WT_veg | OK     | 36,9638  | 84,6728 | 1,19578       | -2,34165      | 0,0191985  | 0,0862589  | no  |
| AN10455 | ChrII_A_nidulans_FGSC_A4:3289018-3290049    | WT_5hasex | WT_veg | OK     | 26,4682  | 50,2766 | 0,925623      | -1,71887      | 0,085638   | 0,260106   | no  |
| AN10456 | ChrII_A_nidulans_FGSC_A4:3159268-3161091    | WT_5hasex | WT_veg | OK     | 126,431  | 332,049 | 1,39305       | -2,86718      | 0,00414148 | 0,025514   | yes |
| AN10457 | ChrII_A_nidulans_FGSC_A4:3120283-3123257    | WT_5hasex | WT_veg | OK     | 28,8911  | 34,7791 | 0,267593      | -0,552595     | 0,580541   | 0,801346   | no  |
| AN10458 | ChrII_A_nidulans_FGSC_A4:3412514-3413038    | WT_5hasex | WT_veg | OK     | 4,83948  | 6,79031 | 0,488625      | -0,545108     | 0,585679   | 0,804687   | no  |
| AN10459 | ChrII_A_nidulans_FGSC_A4:3366127-3368557    | WT_5hasex | WT_veg | OK     | 82,027   | 189,564 | 1,20852       | -2,43278      | 0,0149832  | 0,0714682  | no  |
| AN10460 | ChrII_A_nidulans_FGSC_A4:3392041-3392670    | WT_5hasex | WT_veg | OK     | 49,0271  | 122,379 | 1,3197        | -2,4844       | 0,0129769  | 0,0639953  | no  |
| AN10461 | ChrII_A_nidulans_FGSC_A4:3003542-3004417    | WT_5hasex | WT_veg | OK     | 315,986  | 640,658 | 1,01969       | -2,04729      | 0,0406297  | 0,152567   | no  |
| AN10462 | ChrII_A_nidulans_FGSC_A4:3195698-3197156    | WT_5hasex | WT_veg | OK     | 21,9982  | 75,7684 | 1,78421       | -3,33039      | 0,00086726 | 0,00696702 | yes |
| AN10463 | ChrII_A_nidulans_FGSC_A4:3730183-3732292    | WT_5hasex | WT_veg | NOTEST | 0,083826 | 0       | -1.79769e+308 | -1.79769e+308 | 0,165569   | 1          | no  |
| AN10464 | ChrII_A_nidulans_FGSC_A4:3579554-3580507    | WT_5hasex | WT_veg | NOTEST | 0,259586 | 0       | -1.79769e+308 | -1.79769e+308 | 0,165569   | 1          | no  |
| AN10465 | ChrII_A_nidulans_FGSC_A4:3298381-3299427    | WT_5hasex | WT_veg | OK     | 20,6595  | 39,0582 | 0,918822      | -1,55132      | 0,120825   | 0,329091   | no  |
| AN10466 | ChrII_A_nidulans_FGSC_A4:3274853-3276353    | WT_5hasex | WT_veg | OK     | 89,76    | 255,051 | 1,50664       | -3,14761      | 0,00164612 | 0,0118691  | yes |
| AN10467 | ChrII_A_nidulans_FGSC_A4:3112470-3113931    | WT_5hasex | WT_veg | OK     | 16,1959  | 18,0061 | 0,152859      | -0,268107     | 0,788617   | 0,913747   | no  |
| AN10468 | ChrII_A_nidulans_FGSC_A4:3099487-3101271    | WT_5hasex | WT_veg | OK     | 10,8536  | 45,4495 | 2,06609       | -3,43032      | 0,00060286 | 0,00510687 | yes |
| AN10469 | ChrII_A_nidulans_FGSC_A4:2878490-2879463    | WT_5hasex | WT_veg | OK     | 153,603  | 471,47  | 1,61796       | -3,23017      | 0,00123717 | 0,009355   | yes |
| AN1047  | ChrVIII_A_nidulans_FGSC_A4:16833509-1686471 | WT_5hasex | WT_veg | OK     | 230,004  | 582,071 | 1,33954       | -2,35644      | 0,0184513  | 0,0837129  | no  |
| AN10470 | ChrII_A_nidulans_FGSC_A4:2859131-2860978    | WT_5hasex | WT_veg | OK     | 22,7479  | 27,5684 | 0,277283      | -0,538949     | 0,589922   | 0,807094   | no  |
| AN10471 | ChrII_A_nidulans_FGSC_A4:2851139-2853116    | WT_5hasex | WT_veg | OK     | 2,15573  | 5,38208 | 1,31999       | -1,79941      | 0,0719539  | 0,229967   | no  |
| AN10472 | ChrII_A_nidulans_FGSC_A4:2799168-2801184    | WT_5hasex | WT_veg | OK     | 46,5037  | 40,9654 | -0,182939     | 0,376674      | 0,706416   | 0,873088   | no  |
| AN10473 | ChrII_A_nidulans_FGSC_A4:2855581-2856542    | WT_5hasex | WT_veg | OK     | 3,05705  | 13,5239 | 2,1453        | -2,72501      | 0,00642998 | 0,0365726  | yes |
| AN10474 | ChrII_A_nidulans_FGSC_A4:2801403-2802901    | WT_5hasex | WT_veg | OK     | 76,5     | 61,194  | -0,322069     | 0,66194       | 0,50801    | 0,754862   | no  |
| AN10475 | ChrII_A_nidulans_FGSC_A4:2803090-2804496    | WT_5hasex | WT_veg | OK     | 133,239  | 143,936 | 0,111419      | -0,229441     | 0,818526   | 0,927368   | no  |
| AN10476 | ChrII_A_nidulans_FGSC_A4:2945533-2946808    | WT_5hasex | WT_veg | OK     | 116,523  | 620,155 | 2,41201       | -4,48083      | 7,4355E-06 | 0,00011054 | yes |
| AN10477 | ChrII_A_nidulans_FGSC_A4:2925981-2926870    | WT_5hasex | WT_veg | OK     | 107,812  | 184,715 | 0,776779      | -1,5656       | 0,117442   | 0,322868   | no  |
| AN10478 | ChrII_A_nidulans_FGSC_A4:2858073-2858787    | WT_5hasex | WT_veg | OK     | 6,27185  | 14,4345 | 1,20256       | -1,53045      | 0,125905   | 0,337909   | no  |
| AN1048  | ChrVIII_A_nidulans_FGSC_A4:1680653-1681891  | WT_5hasex | WT_veg | OK     | 28,3433  | 71,8268 | 1,34151       | -2,42431      | 0,0153374  | 0,0727209  | no  |
| AN10480 | ChrII_A_nidulans_FGSC_A4:2879632-2880862    | WT_5hasex | WT_veg | OK     | 39,2546  | 43,7407 | 0,156114      | -0,306585     | 0,759159   | 0,900278   | no  |
| AN10481 | ChrII_A_nidulans_FGSC_A4:2739001-2740005    | WT_5hasex | WT_veg | OK     | 6,12542  | 15,9759 | 1,38302       | -2,02954      | 0,0424028  | 0,15741    | no  |
| AN10483 | ChrII_A_nidulans_FGSC_A4:2736621-2737642    | WT_5hasex | WT_veg | OK     | 75,6575  | 329,071 | 2,12084       | -4,34073      | 1,4201E-05 | 0,00019702 | yes |
| AN10484 | ChrII_A_nidulans_FGSC_A4:2716660-2718020    | WT_5hasex | WT_veg | OK     | 17,862   | 57,5459 | 1,68782       | -3,08286      | 0,00205019 | 0,0142751  | yes |
| AN10485 | ChrII_A_nidulans_FGSC_A4:2694938-2697287    | WT_5hasex | WT_veg | OK     | 3,23233  | 8,94481 | 1,46848       | -2,13806      | 0,032512   | 0,129136   | no  |
| AN10486 | ChrII_A_nidulans_FGSC_A4:2673330-2676584    | WT_5hasex | WT_veg | OK     | 3,95773  | 6,82228 | 0,785582      | -1,26859      | 0,204588   | 0,460874   | no  |
| AN10487 | ChrII_A_nidulans_FGSC_A4:2619580-2621444    | WT_5hasex | WT_veg | OK     | 20,7766  | 26,3862 | 0,344824      | -0,633779     | 0,526225   | 0,767364   | no  |
| AN10488 | ChrII_A_nidulans_FGSC_A4:2502001-2502767    | WT_5hasex | WT_veg | NOTEST | 1,09525  | 0       | -1.79769e+308 | -1.79769e+308 | 0,081629   | 1          | no  |
| AN1049  | ChrVIII_A_nidulans_FGSC_A4:1679199-1680273  | WT_5hasex | WT_veg | OK     | 106,746  | 521,805 | 2,28932       | -4,17298      | 3,0065E-05 | 0,00038444 | yes |
| AN10491 | ChrII_A_nidulans_FGSC_A4:2677115-2679497    | WT_5hasex | WT_veg | OK     | 6,66593  | 19,7915 | 1,57          | -2,67174      | 0,00754598 | 0,0416236  | yes |
| AN10492 | ChrII_A_nidulans_FGSC_A4:2621807-2623608    | WT_5hasex | WT_veg | OK     | 7,02569  | 16,7539 | 1,25379       | -1,99912      | 0,0455955  | 0,166138   | no  |
| AN10493 | ChrII_A_nidulans_FGSC_A4:2500684-2501610    | WT_5hasex | WT_veg | NOTEST | 0,244144 | 0       | -1.79769e+308 | -1.79769e+308 | 0,224063   | 1          | no  |

## Supplementary table 1

|         |                                            |           |        |        |          |         |             |             |            |            |     |
|---------|--------------------------------------------|-----------|--------|--------|----------|---------|-------------|-------------|------------|------------|-----|
| AN10494 | ChrII_A_nidulans_FGSC_A4:2443412-2444451   | WT_5hasex | WT_veg | OK     | 2,81352  | 9,51482 | 1,7578      | -2,25272    | 0,0242765  | 0,10304    | no  |
| AN10495 | ChrII_A_nidulans_FGSC_A4:2355255-2356899   | WT_5hasex | WT_veg | OK     | 13,2434  | 28,6045 | 1,11097     | -1,97704    | 0,0480366  | 0,172732   | no  |
| AN10496 | ChrII_A_nidulans_FGSC_A4:2294913-2296370   | WT_5hasex | WT_veg | OK     | 106,122  | 431,845 | 2,02479     | -4,12312    | 3,7377E-05 | 0,00046501 | yes |
| AN10497 | ChrII_A_nidulans_FGSC_A4:2248138-2250965   | WT_5hasex | WT_veg | OK     | 18,6591  | 50,3215 | 1,4313      | -2,84432    | 0,00445061 | 0,0271124  | yes |
| AN10498 | ChrII_A_nidulans_FGSC_A4:2252073-2255913   | WT_5hasex | WT_veg | OK     | 19,7078  | 47,5736 | 1,27139     | -2,59968    | 0,00933103 | 0,0492808  | yes |
| AN10499 | ChrII_A_nidulans_FGSC_A4:2468195-2469256   | WT_5hasex | WT_veg | OK     | 0,811906 | 13,2683 | 4,03052     | -4,48001    | 7,4639E-06 | 0,00011083 | yes |
| AN10500 | ChrVIII_A_nidulans_FGSC_A4:1677744-1679175 | WT_5hasex | WT_veg | OK     | 25,0652  | 27,8087 | 0,14985     | -0,287683   | 0,773589   | 0,907227   | no  |
| AN10501 | ChrII_A_nidulans_FGSC_A4:2494218-2495333   | WT_5hasex | WT_veg | OK     | 2,8118   | 8,18133 | 1,54084     | -2,00102    | 0,0453898  | 0,165635   | no  |
| AN10502 | ChrII_A_nidulans_FGSC_A4:2332058-2334183   | WT_5hasex | WT_veg | OK     | 18,4586  | 47,3338 | 1,35858     | -2,6222     | 0,0087365  | 0,04683    | yes |
| AN10502 | ChrII_A_nidulans_FGSC_A4:2445551-2447952   | WT_5hasex | WT_veg | NOTEST | 0        | 0       | 0           | 0           | 0          | 1          | no  |
| AN10504 | ChrII_A_nidulans_FGSC_A4:2291568-2294029   | WT_5hasex | WT_veg | OK     | 4,42875  | 3,18453 | -0,475819   | 0,713118    | 0,475773   | 0,732028   | no  |
| AN10505 | ChrII_A_nidulans_FGSC_A4:2469691-2470984   | WT_5hasex | WT_veg | OK     | 11,5609  | 8,57466 | -0,431101   | 0,665663    | 0,505627   | 0,753515   | no  |
| AN10506 | ChrII_A_nidulans_FGSC_A4:2005375-2007664   | WT_5hasex | WT_veg | OK     | 12,8324  | 1,69852 | -2,91744    | 4,19426     | 2,7377E-05 | 0,00035326 | yes |
| AN10507 | ChrII_A_nidulans_FGSC_A4:2008314-2009054   | WT_5hasex | WT_veg | OK     | 468,037  | 114,579 | -2,03028    | 3,83389     | 0,00012614 | 0,00134426 | yes |
| AN10508 | ChrII_A_nidulans_FGSC_A4:1884675-1885515   | WT_5hasex | WT_veg | OK     | 65,1083  | 243,846 | 1,90506     | -3,81008    | 0,00013893 | 0,00145735 | yes |
| AN10509 | ChrII_A_nidulans_FGSC_A4:2120977-2121780   | WT_5hasex | WT_veg | OK     | 77,2991  | 51,0969 | -0,597216   | 1,01684     | 0,309231   | 0,585628   | no  |
| AN10510 | ChrII_A_nidulans_FGSC_A4:1908788-1909770   | WT_5hasex | WT_veg | OK     | 60,3746  | 291,1   | 2,2695      | -4,56847    | 4,913E-06  | 7,6169E-05 | yes |
| AN10511 | ChrII_A_nidulans_FGSC_A4:2074586-2075745   | WT_5hasex | WT_veg | OK     | 86,1969  | 251,676 | 1,54586     | -3,14055    | 0,00168633 | 0,0121068  | yes |
| AN10513 | ChrII_A_nidulans_FGSC_A4:1839486-1842290   | WT_5hasex | WT_veg | OK     | 15,9285  | 42,8349 | 1,42718     | -2,8607     | 0,00422706 | 0,0259679  | yes |
| AN10514 | ChrII_A_nidulans_FGSC_A4:1835731-1836835   | WT_5hasex | WT_veg | OK     | 6,65594  | 7,27401 | 0,128108    | -0,181692   | 0,855825   | 0,943709   | no  |
| AN10515 | ChrII_A_nidulans_FGSC_A4:1796878-1800205   | WT_5hasex | WT_veg | OK     | 27,8413  | 44,3025 | 0,670164    | -1,35328    | 0,175967   | 0,420322   | no  |
| AN10517 | ChrII_A_nidulans_FGSC_A4:1757636-1759640   | WT_5hasex | WT_veg | OK     | 5,30359  | 9,23574 | 0,800258    | -1,19494    | 0,23211    | 0,496416   | no  |
| AN10518 | ChrII_A_nidulans_FGSC_A4:1705528-1706752   | WT_5hasex | WT_veg | OK     | 461,448  | 2147,9  | 2,21869     | -3,6893     | 0,00022487 | 0,00220545 | yes |
| AN10519 | ChrII_A_nidulans_FGSC_A4:1686027-1687532   | WT_5hasex | WT_veg | OK     | 117,197  | 153,054 | 0,385106    | -0,792373   | 0,428143   | 0,694728   | no  |
| AN10520 | ChrII_A_nidulans_FGSC_A4:1854875-1856513   | WT_5hasex | WT_veg | OK     | 5,63947  | 10,1318 | 0,845263    | -1,30848    | 0,19071    | 0,441607   | no  |
| AN10521 | ChrII_A_nidulans_FGSC_A4:1795716-1796544   | WT_5hasex | WT_veg | OK     | 12,5536  | 24,6537 | 0,973702    | -1,51477    | 0,12983    | 0,345014   | no  |
| AN10522 | ChrII_A_nidulans_FGSC_A4:1771935-1774935   | WT_5hasex | WT_veg | OK     | 29,1164  | 28,1851 | -0,0468975  | 0,0965722   | 0,923066   | 0,970847   | no  |
| AN10523 | ChrII_A_nidulans_FGSC_A4:1706916-1708082   | WT_5hasex | WT_veg | OK     | 24,7918  | 61,3119 | 1,3063      | -2,41591    | 0,015696   | 0,0740661  | no  |
| AN10524 | ChrII_A_nidulans_FGSC_A4:1687998-1689477   | WT_5hasex | WT_veg | OK     | 15,5593  | 26,5171 | 0,769145    | -1,38603    | 0,165738   | 0,404234   | no  |
| AN10525 | ChrII_A_nidulans_FGSC_A4:1821122-1821914   | WT_5hasex | WT_veg | OK     | 292,313  | 374,969 | 0,359255    | -0,738329   | 0,460315   | 0,720367   | no  |
| AN10527 | ChrII_A_nidulans_FGSC_A4:1662843-1665173   | WT_5hasex | WT_veg | OK     | 92,1892  | 150,328 | 0,705444    | -1,46309    | 0,143444   | 0,368468   | no  |
| AN10528 | ChrII_A_nidulans_FGSC_A4:1648918-1649601   | WT_5hasex | WT_veg | OK     | 26,2716  | 25,5874 | -0,0380692  | 0,0648659   | 0,948281   | 0,980822   | no  |
| AN10529 | ChrII_A_nidulans_FGSC_A4:1761931-1763674   | WT_5hasex | WT_veg | NOTEST | 1,45359  | 2,75288 | 0,921318    | -1,06569    | 0,286562   | 1          | no  |
| AN1053  | ChrVIII_A_nidulans_FGSC_A4:1664097-1666568 | WT_5hasex | WT_veg | OK     | 7,66587  | 9,43679 | 0,299846    | -0,5165     | 0,605505   | 0,816652   | no  |
| AN10530 | ChrII_A_nidulans_FGSC_A4:1834221-1835533   | WT_5hasex | WT_veg | OK     | 2,31841  | 2,60771 | 0,169649    | -0,193433   | 0,84662    | 0,939469   | no  |
| AN10531 | ChrII_A_nidulans_FGSC_A4:1837511-1838702   | WT_5hasex | WT_veg | OK     | 10,8126  | 11,5598 | 0,0964034   | -0,15679    | 0,875411   | 0,952313   | no  |
| AN10532 | ChrII_A_nidulans_FGSC_A4:1756245-1757490   | WT_5hasex | WT_veg | OK     | 7,9769   | 15,3812 | 0,947266    | -1,44056    | 0,149709   | 0,378493   | no  |
| AN10533 | ChrII_A_nidulans_FGSC_A4:1588593-1591898   | WT_5hasex | WT_veg | OK     | 221,14   | 1466,37 | 2,72921     | -4,60475    | 4,1296E-06 | 6,5083E-05 | yes |
| AN10534 | ChrII_A_nidulans_FGSC_A4:1591947-1593049   | WT_5hasex | WT_veg | OK     | 5,89931  | 8,49002 | 0,525221    | -0,744613   | 0,456506   | 0,717511   | no  |
| AN10535 | ChrII_A_nidulans_FGSC_A4:1618352-1621603   | WT_5hasex | WT_veg | OK     | 15,4904  | 23,1653 | 0,580593    | -1,16556    | 0,243794   | 0,511123   | no  |
| AN10536 | ChrII_A_nidulans_FGSC_A4:1498382-1499676   | WT_5hasex | WT_veg | OK     | 39,4244  | 141,198 | 1,84056     | -3,57275    | 0,00035325 | 0,00323315 | yes |
| AN10537 | ChrII_A_nidulans_FGSC_A4:1472278-1474489   | WT_5hasex | WT_veg | OK     | 25,2214  | 99,1718 | 1,97528     | -4,06968    | 4,7078E-05 | 0,00056777 | yes |
| AN10539 | ChrIII_A_nidulans_FGSC_A4:2464113-2464962  | WT_5hasex | WT_veg | OK     | 45,7542  | 251,718 | 2,45983     | -4,78474    | 1,7121E-06 | 2,9876E-05 | yes |
| AN1054  | ChrVIII_A_nidulans_FGSC_A4:1662410-1663866 | WT_5hasex | WT_veg | OK     | 6,33887  | 14,9583 | 1,23865     | -1,80904    | 0,0704451  | 0,226642   | no  |
| AN10540 | ChrIII_A_nidulans_FGSC_A4:2400472-2402805  | WT_5hasex | WT_veg | OK     | 165,923  | 255,6   | 0,623379    | -1,1389     | 0,254745   | 0,52399    | no  |
| AN10541 | ChrIII_A_nidulans_FGSC_A4:2377995-2380534  | WT_5hasex | WT_veg | OK     | 23,0938  | 38,8844 | 0,751684    | -1,51836    | 0,128924   | 0,343441   | no  |
| AN10542 | ChrIII_A_nidulans_FGSC_A4:2376334-2377445  | WT_5hasex | WT_veg | OK     | 26,9554  | 62,4057 | 1,2111      | -2,27408    | 0,0229613  | 0,0988687  | no  |
| AN10543 | ChrIII_A_nidulans_FGSC_A4:2359824-2362017  | WT_5hasex | WT_veg | OK     | 6,22822  | 8,19185 | 0,395369    | -0,631742   | 0,527555   | 0,768044   | no  |
| AN10544 | ChrIII_A_nidulans_FGSC_A4:2315085-2317181  | WT_5hasex | WT_veg | OK     | 8,36548  | 8,3637  | -0,00030621 | 0,000520203 | 0,999585   | 0,999874   | no  |
| AN10545 | ChrIII_A_nidulans_FGSC_A4:2403824-2404966  | WT_5hasex | WT_veg | OK     | 54,0856  | 100,16  | 0,888983    | -1,75427    | 0,0793837  | 0,246438   | no  |
| AN10546 | ChrIII_A_nidulans_FGSC_A4:2381444-2382743  | WT_5hasex | WT_veg | OK     | 95,0952  | 227,175 | 1,25636     | -2,6045     | 0,00920075 | 0,0487648  | yes |
| AN10547 | ChrIII_A_nidulans_FGSC_A4:2375455-2376211  | WT_5hasex | WT_veg | OK     | 216,62   | 1027,16 | 2,24542     | -4,37159    | 1,2334E-05 | 0,00017296 | yes |
| AN10548 | ChrIII_A_nidulans_FGSC_A4:2310161-2314585  | WT_5hasex | WT_veg | OK     | 3,79743  | 8,34736 | 1,13629     | -1,89319    | 0,0583321  | 0,198071   | no  |



## Supplementary table 1

|         |                                            |           |        |        |          |          |             |           |            |            |      |
|---------|--------------------------------------------|-----------|--------|--------|----------|----------|-------------|-----------|------------|------------|------|
| AN1055  | ChrVIII_A_nidulans_FGSC_A4:1659461-1661592 | WT_5hasex | WT_veg | OK     | 63,1989  | 113,366  | 0,843013    | -1,76599  | 0,077398   | 0,242181   | no   |
| AN10550 | ChrIII_A_nidulans_FGSC_A4:2356897-2359347  | WT_5hasex | WT_veg | NOTEST | 1,29626  | 3,06898  | 1,2434      | -1,59729  | 0,110201   | 0,110201   | 1 no |
| AN10551 | ChrIII_A_nidulans_FGSC_A4:2119089-2123487  | WT_5hasex | WT_veg | OK     | 10,8553  | 80,178   | 2,88481     | -5,81402  | 6,0991E-09 | 1,8432E-07 | yes  |
| AN10552 | ChrIII_A_nidulans_FGSC_A4:2096271-2097966  | WT_5hasex | WT_veg | OK     | 23,9486  | 74,4539  | 1,63641     | -3,08963  | 0,00200407 | 0,013993   | yes  |
| AN10553 | ChrIII_A_nidulans_FGSC_A4:2123802-2124556  | WT_5hasex | WT_veg | OK     | 460,05   | 570,956  | 0,311587    | -0,62629  | 0,531125   | 0,770329   | no   |
| AN10554 | ChrIII_A_nidulans_FGSC_A4:2098105-2099004  | WT_5hasex | WT_veg | OK     | 7,95955  | 27,7141  | 1,79986     | -2,55714  | 0,0105536  | 0,0543359  | no   |
| AN10555 | ChrIII_A_nidulans_FGSC_A4:2047873-2049346  | WT_5hasex | WT_veg | OK     | 18,7248  | 22,5749  | 0,269768    | -0,505146 | 0,613456   | 0,821065   | no   |
| AN10556 | ChrIII_A_nidulans_FGSC_A4:2036964-2040437  | WT_5hasex | WT_veg | OK     | 53,8961  | 78,6569  | 0,545392    | -1,11721  | 0,263906   | 0,534872   | no   |
| AN10557 | ChrIII_A_nidulans_FGSC_A4:1961381-1963894  | WT_5hasex | WT_veg | OK     | 14,0465  | 134,995  | 3,26463     | -6,50349  | 7,8477E-11 | 3,2794E-09 | yes  |
| AN10558 | ChrIII_A_nidulans_FGSC_A4:2049732-2051580  | WT_5hasex | WT_veg | OK     | 34,0818  | 20,2157  | -0,753529   | 1,37468   | 0,16923    | 0,409475   | no   |
| AN10559 | ChrIII_A_nidulans_FGSC_A4:2035303-2036575  | WT_5hasex | WT_veg | OK     | 24,814   | 49,9147  | 1,00831     | -1,82807  | 0,0675385  | 0,219796   | no   |
| AN1056  | ChrVIII_A_nidulans_FGSC_A4:1657943-1659295 | WT_5hasex | WT_veg | OK     | 34,0892  | 46,0737  | 0,434629    | -0,860464 | 0,389534   | 0,662967   | no   |
| AN10560 | ChrIII_A_nidulans_FGSC_A4:1965637-1968206  | WT_5hasex | WT_veg | OK     | 13,3649  | 71,4107  | 2,41769     | -4,69649  | 2,6467E-06 | 4,4015E-05 | yes  |
| AN10561 | ChrIII_A_nidulans_FGSC_A4:1929018-1930112  | WT_5hasex | WT_veg | OK     | 96,8867  | 96,5045  | -0,00570156 | 0,0117259 | 0,990644   | 0,996611   | no   |
| AN10564 | ChrIII_A_nidulans_FGSC_A4:1736237-1739295  | WT_5hasex | WT_veg | OK     | 16,5469  | 12,8133  | -0,368921   | 0,735044  | 0,462313   | 0,721825   | no   |
| AN10565 | ChrIII_A_nidulans_FGSC_A4:1638294-1639288  | WT_5hasex | WT_veg | NOTEST | 0,194159 | 0,976471 | 2,33034     | -1,18644  | 0,235448   | 1 no       |      |
| AN10566 | ChrIII_A_nidulans_FGSC_A4:1808004-1809081  | WT_5hasex | WT_veg | OK     | 2,21738  | 4,04004  | 0,865512    | -1,01248  | 0,311308   | 0,587692   | no   |
| AN10567 | ChrIII_A_nidulans_FGSC_A4:1739470-1740843  | WT_5hasex | WT_veg | OK     | 33,5178  | 93,8738  | 1,4858      | -2,81349  | 0,00490072 | 0,0292691  | yes  |
| AN10568 | ChrIII_A_nidulans_FGSC_A4:1927682-1928708  | WT_5hasex | WT_veg | OK     | 55,0823  | 88,8192  | 0,689283    | -1,35378  | 0,175807   | 0,420247   | no   |
| AN10569 | ChrIII_A_nidulans_FGSC_A4:1799917-1800706  | WT_5hasex | WT_veg | OK     | 36,0404  | 151,94   | 2,07582     | -3,7872   | 0,00015236 | 0,00157564 | yes  |
| AN1057  | ChrVIII_A_nidulans_FGSC_A4:1654951-1657461 | WT_5hasex | WT_veg | OK     | 57,5888  | 118,194  | 1,03729     | -2,16682  | 0,0302486  | 0,122071   | no   |
| AN10570 | ChrIII_A_nidulans_FGSC_A4:1637302-1638125  | WT_5hasex | WT_veg | OK     | 34,307   | 33,7022  | -0,0256606  | 0,0464923 | 0,962918   | 0,986449   | no   |
| AN10571 | ChrIII_A_nidulans_FGSC_A4:1491712-1492683  | WT_5hasex | WT_veg | OK     | 2,95235  | 8,26289  | 1,48478     | -1,80585  | 0,0709425  | 0,227675   | no   |
| AN10572 | ChrIII_A_nidulans_FGSC_A4:1460639-1462324  | WT_5hasex | WT_veg | OK     | 16,817   | 32,1365  | 0,934296    | -1,75333  | 0,0795449  | 0,246806   | no   |
| AN10574 | ChrIII_A_nidulans_FGSC_A4:1399045-1403873  | WT_5hasex | WT_veg | OK     | 39,3448  | 139,831  | 1,82944     | -3,55536  | 0,00037747 | 0,00341803 | yes  |
| AN10575 | ChrIII_A_nidulans_FGSC_A4:1462957-1463934  | WT_5hasex | WT_veg | OK     | 347,491  | 955,715  | 1,4596      | -2,88688  | 0,00389087 | 0,0242466  | yes  |
| AN10578 | ChrIII_A_nidulans_FGSC_A4:1404517-1405524  | WT_5hasex | WT_veg | OK     | 272,079  | 596,833  | 1,1333      | -2,30962  | 0,0209094  | 0,092219   | no   |
| AN10579 | ChrIII_A_nidulans_FGSC_A4:1490533-1491676  | WT_5hasex | WT_veg | OK     | 2,73528  | 14,8217  | 2,43795     | -3,1075   | 0,00188675 | 0,0132907  | yes  |
| AN1058  | ChrVIII_A_nidulans_FGSC_A4:1649781-1651367 | WT_5hasex | WT_veg | OK     | 305,27   | 615,996  | 1,01284     | -1,94457  | 0,0518273  | 0,182016   | no   |
| AN10580 | ChrIII_A_nidulans_FGSC_A4:1295955-1298078  | WT_5hasex | WT_veg | OK     | 51,9007  | 149,333  | 1,52471     | -3,07494  | 0,00210545 | 0,0145829  | yes  |
| AN10581 | ChrIII_A_nidulans_FGSC_A4:1211530-1212691  | WT_5hasex | WT_veg | OK     | 997,365  | 3807,18  | 1,93253     | -3,35009  | 0,00080784 | 0,00654896 | yes  |
| AN10582 | ChrIII_A_nidulans_FGSC_A4:1138617-1140392  | WT_5hasex | WT_veg | OK     | 27,7387  | 14,3655  | -0,949296   | 1,57161   | 0,116041   | 0,320126   | no   |
| AN10583 | ChrIII_A_nidulans_FGSC_A4:1088101-1090875  | WT_5hasex | WT_veg | OK     | 16,4493  | 21,7802  | 0,40499     | -0,687953 | 0,491482   | 0,74365    | no   |
| AN10584 | ChrIII_A_nidulans_FGSC_A4:1062780-1064124  | WT_5hasex | WT_veg | OK     | 163,472  | 260,643  | 0,673036    | -1,33337  | 0,18241    | 0,429795   | no   |
| AN10585 | ChrIII_A_nidulans_FGSC_A4:1140705-1141642  | WT_5hasex | WT_veg | OK     | 1182,33  | 1089,57  | -0,117882   | 0,213837  | 0,830674   | 0,93262    | no   |
| AN10586 | ChrIII_A_nidulans_FGSC_A4:1088101-1090875  | WT_5hasex | WT_veg | OK     | 31,2015  | 45,7251  | 0,551369    | -1,08755  | 0,276793   | 0,549997   | no   |
| AN10588 | ChrIII_A_nidulans_FGSC_A4:1299221-1299773  | WT_5hasex | WT_veg | OK     | 55,1336  | 126,465  | 1,19774     | -1,92634  | 0,0540616  | 0,187471   | no   |
| AN10589 | ChrIII_A_nidulans_FGSC_A4:1209395-1211426  | WT_5hasex | WT_veg | OK     | 16,5775  | 15,0107  | -0,143235   | 0,271779  | 0,785792   | 0,912491   | no   |
| AN10590 | ChrIII_A_nidulans_FGSC_A4:1091180-1092012  | WT_5hasex | WT_veg | OK     | 21,7086  | 93,1077  | 2,10063     | -3,60801  | 0,00030856 | 0,00288938 | yes  |
| AN10591 | ChrIII_A_nidulans_FGSC_A4:1064651-1066922  | WT_5hasex | WT_veg | OK     | 14,2314  | 22,6815  | 0,67244     | -1,29089  | 0,196743   | 0,450011   | no   |
| AN10592 | ChrIII_A_nidulans_FGSC_A4:1277030-1277582  | WT_5hasex | WT_veg | OK     | 24,2605  | 128,622  | 2,4184      | -3,98665  | 6,7013E-05 | 0,0007739  | yes  |
| AN10593 | ChrIII_A_nidulans_FGSC_A4:1045521-1046551  | WT_5hasex | WT_veg | OK     | 21,8508  | 41,2273  | 0,915916    | -1,64405  | 0,100166   | 0,289713   | no   |
| AN10594 | ChrIII_A_nidulans_FGSC_A4:955951-956917    | WT_5hasex | WT_veg | OK     | 74,8445  | 138,051  | 0,883236    | -1,77296  | 0,0762353  | 0,239602   | no   |
| AN10596 | ChrIII_A_nidulans_FGSC_A4:957601-959784    | WT_5hasex | WT_veg | OK     | 12,5031  | 20,9695  | 0,746004    | -1,31447  | 0,188689   | 0,43877    | no   |
| AN10597 | ChrIII_A_nidulans_FGSC_A4:888337-889248    | WT_5hasex | WT_veg | OK     | 19,3889  | 41,5134  | 1,09834     | -1,82867  | 0,0674489  | 0,219629   | no   |
| AN10598 | ChrIII_A_nidulans_FGSC_A4:927622-930210    | WT_5hasex | WT_veg | OK     | 26,2724  | 75,0907  | 1,51508     | -3,13885  | 0,00169612 | 0,012167   | yes  |
| AN10599 | ChrIII_A_nidulans_FGSC_A4:852625-853936    | WT_5hasex | WT_veg | OK     | 1,55502  | 5,72211  | 1,87961     | -2,23224  | 0,0255992  | 0,107411   | no   |
| AN1060  | ChrVIII_A_nidulans_FGSC_A4:1639143-1643667 | WT_5hasex | WT_veg | OK     | 15,9532  | 23,4121  | 0,553411    | -1,15927  | 0,246346   | 0,51416    | no   |
| AN10600 | ChrIII_A_nidulans_FGSC_A4:854250-856640    | WT_5hasex | WT_veg | NOTEST | 1,26832  | 3,6512   | 1,52546     | -1,8371   | 0,0661957  | 1 no       |      |
| AN10601 | ChrIII_A_nidulans_FGSC_A4:814214-815530    | WT_5hasex | WT_veg | OK     | 7,79345  | 7,45928  | -0,063224   | 0,0944172 | 0,924778   | 0,971575   | no   |
| AN10602 | ChrIII_A_nidulans_FGSC_A4:804595-806180    | WT_5hasex | WT_veg | OK     | 27,5645  | 41,9649  | 0,606369    | -0,968639 | 0,332725   | 0,609059   | no   |
| AN10603 | ChrIII_A_nidulans_FGSC_A4:789577-792080    | WT_5hasex | WT_veg | OK     | 37,4246  | 64,5623  | 0,786705    | -1,52226  | 0,127945   | 0,341606   | no   |
| AN10604 | ChrIII_A_nidulans_FGSC_A4:812507-813793    | WT_5hasex | WT_veg | OK     | 36,0375  | 44,7342  | 0,311879    | -0,609924 | 0,541912   | 0,776965   | no   |

## Supplementary table 1

|         |                                            |           |        |        |          |          |               |               |            |            |     |
|---------|--------------------------------------------|-----------|--------|--------|----------|----------|---------------|---------------|------------|------------|-----|
| AN10605 | ChrIII_A_nidulans_FGSC_A4:806233-807352    | WT_5hasex | WT_veg | NOTEST | 0,253928 | 1,80417  | 2,82884       | -1,37002      | 0,170679   | 1          | no  |
| AN10606 | ChrIII_A_nidulans_FGSC_A4:792460-795138    | WT_5hasex | WT_veg | OK     | 21,8907  | 27,331   | 0,320222      | -0,642637     | 0,52046    | 0,763868   | no  |
| AN10607 | ChrIII_A_nidulans_FGSC_A4:768215-770924    | WT_5hasex | WT_veg | OK     | 32,9274  | 94,1212  | 1,51523       | -3,10518      | 0,00190161 | 0,0133792  | yes |
| AN10608 | ChrIII_A_nidulans_FGSC_A4:761055-761743    | WT_5hasex | WT_veg | OK     | 6,67619  | 16,5411  | 1,30896       | -1,79861      | 0,0720806  | 0,230245   | no  |
| AN10609 | ChrIII_A_nidulans_FGSC_A4:669126-670922    | WT_5hasex | WT_veg | OK     | 95,5388  | 176,516  | 0,885637      | -1,77753      | 0,0754806  | 0,237869   | no  |
| AN1061  | ChrVIII_A_nidulans_FGSC_A4:1635879-1637614 | WT_5hasex | WT_veg | OK     | 54,2489  | 58,0674  | 0,0981337     | -0,184363     | 0,853729   | 0,942707   | no  |
| AN10610 | ChrIII_A_nidulans_FGSC_A4:420788-422201    | WT_5hasex | WT_veg | OK     | 26,7433  | 29,1303  | 0,123341      | -0,235025     | 0,814189   | 0,925531   | no  |
| AN10611 | ChrIII_A_nidulans_FGSC_A4:303446-305801    | WT_5hasex | WT_veg | OK     | 15,2334  | 15,9548  | 0,0667538     | -0,124551     | 0,900879   | 0,961873   | no  |
| AN10612 | ChrIII_A_nidulans_FGSC_A4:181133-182222    | WT_5hasex | WT_veg | NOTEST | 0,276688 | 0        | -1.79769e+308 | -1.79769e+308 | 0,224063   | 1          | no  |
| AN10614 | ChrIII_A_nidulans_FGSC_A4:615526-617379    | WT_5hasex | WT_veg | OK     | 548,02   | 891,604  | 0,702174      | -1,25559      | 0,209264   | 0,46707    | no  |
| AN10615 | ChrIII_A_nidulans_FGSC_A4:603063-605425    | WT_5hasex | WT_veg | OK     | 141,077  | 274,443  | 0,960026      | -1,94277      | 0,0520441  | 0,182496   | no  |
| AN10616 | ChrIII_A_nidulans_FGSC_A4:765808-767013    | WT_5hasex | WT_veg | OK     | 16,373   | 71,6356  | 2,12936       | -3,75853      | 0,00017091 | 0,0017411  | yes |
| AN10618 | ChrIII_A_nidulans_FGSC_A4:671074-673174    | WT_5hasex | WT_veg | OK     | 10,4036  | 41,7614  | 2,00508       | -3,60585      | 0,00031114 | 0,00290992 | yes |
| AN10619 | ChrIII_A_nidulans_FGSC_A4:673230-675428    | WT_5hasex | WT_veg | OK     | 25,6669  | 100,669  | 1,97164       | -3,71957      | 0,00019956 | 0,00198846 | yes |
| AN1062  | ChrVIII_A_nidulans_FGSC_A4:1632489-1635229 | WT_5hasex | WT_veg | OK     | 17,2708  | 22,6092  | 0,388574      | -0,692076     | 0,488889   | 0,741924   | no  |
| AN10620 | ChrIII_A_nidulans_FGSC_A4:422541-423821    | WT_5hasex | WT_veg | OK     | 26,9327  | 31,6263  | 0,231766      | -0,439001     | 0,660661   | 0,847573   | no  |
| AN10621 | ChrIII_A_nidulans_FGSC_A4:306631-309838    | WT_5hasex | WT_veg | OK     | 14,5103  | 32,3006  | 1,15448       | -2,21379      | 0,0268433  | 0,111364   | no  |
| AN10622 | ChrIII_A_nidulans_FGSC_A4:326865-327539    | WT_5hasex | WT_veg | OK     | 83,1239  | 141,429  | 0,766747      | -1,45903      | 0,144557   | 0,370214   | no  |
| AN10623 | ChrIII_A_nidulans_FGSC_A4:178819-180284    | WT_5hasex | WT_veg | NOTEST | 0,494667 | 0        | -1.79769e+308 | -1.79769e+308 | 0,0537957  | 1          | no  |
| AN10624 | ChrIII_A_nidulans_FGSC_A4:174504-175858    | WT_5hasex | WT_veg | NOTEST | 0        | 0,727079 | 1.79769e+308  | 1.79769e+308  | 0,123323   | 1          | no  |
| AN10625 | ChrIII_A_nidulans_FGSC_A4:49562-51566      | WT_5hasex | WT_veg | OK     | 19,5272  | 57,3992  | 1,55554       | -2,9436       | 0,00324418 | 0,0208591  | yes |
| AN10626 | ChrIII_A_nidulans_FGSC_A4:35595-37465      | WT_5hasex | WT_veg | OK     | 18,333   | 20,0781  | 0,131183      | -0,25335      | 0,799997   | 0,91931    | no  |
| AN10627 | ChrIII_A_nidulans_FGSC_A4:51865-53499      | WT_5hasex | WT_veg | OK     | 14,336   | 81,2662  | 2,50302       | -4,39504      | 1,1075E-05 | 0,00015732 | yes |
| AN10629 | ChrIII_A_nidulans_FGSC_A4:31166-32699      | WT_5hasex | WT_veg | OK     | 5,24651  | 23,425   | 2,15862       | -3,27246      | 0,00106614 | 0,00827552 | yes |
| AN1063  | ChrVIII_A_nidulans_FGSC_A4:1632489-1635229 | WT_5hasex | WT_veg | OK     | 130,843  | 178,017  | 0,444178      | -0,886022     | 0,375605   | 0,650338   | no  |
| AN10630 | ChrIII_A_nidulans_FGSC_A4:16180-17145      | WT_5hasex | WT_veg | NOTEST | 0        | 0        | 0             | 0             | 1          | 1          | no  |
| AN10631 | ChrIII_A_nidulans_FGSC_A4:37831-38651      | WT_5hasex | WT_veg | OK     | 14,1869  | 62,3028  | 2,13474       | -3,43589      | 0,0005906  | 0,00502171 | yes |
| AN10632 | ChrV_A_nidulans_FGSC_A4:1139582-1140863    | WT_5hasex | WT_veg | NOTEST | 1,4218   | 3,61478  | 1,34619       | -1,50107      | 0,133338   | 1          | no  |
| AN10634 | ChrV_A_nidulans_FGSC_A4:1259268-1261828    | WT_5hasex | WT_veg | OK     | 61,985   | 240,93   | 1,95863       | -3,8629       | 0,00011205 | 0,00121317 | yes |
| AN10636 | ChrV_A_nidulans_FGSC_A4:1276172-1277565    | WT_5hasex | WT_veg | OK     | 28,5968  | 45,2035  | 0,660579      | -1,29555      | 0,19513    | 0,44763    | no  |
| AN10637 | ChrV_A_nidulans_FGSC_A4:1277971-1280667    | WT_5hasex | WT_veg | OK     | 33,548   | 71,895   | 1,09967       | -2,29767      | 0,0215808  | 0,0943814  | no  |
| AN10638 | ChrV_A_nidulans_FGSC_A4:1289219-1291796    | WT_5hasex | WT_veg | OK     | 10,5587  | 27,2068  | 1,36554       | -2,44231      | 0,0145935  | 0,0700489  | no  |
| AN10639 | ChrV_A_nidulans_FGSC_A4:1296908-1298661    | WT_5hasex | WT_veg | OK     | 20,825   | 12,1585  | -0,776344     | 1,4768        | 0,13973    | 0,362041   | no  |
| AN10640 | ChrV_A_nidulans_FGSC_A4:1323488-1324867    | WT_5hasex | WT_veg | OK     | 17,4215  | 38,6166  | 1,14835       | -2,02376      | 0,0429948  | 0,159021   | no  |
| AN10641 | ChrV_A_nidulans_FGSC_A4:1281089-1281868    | WT_5hasex | WT_veg | OK     | 73,1999  | 228,145  | 1,64004       | -3,15861      | 0,00158522 | 0,011507   | yes |
| AN10642 | ChrV_A_nidulans_FGSC_A4:1292442-1293250    | WT_5hasex | WT_veg | OK     | 29,158   | 56,511   | 0,954641      | -1,70401      | 0,0883785  | 0,26581    | no  |
| AN10643 | ChrV_A_nidulans_FGSC_A4:1275319-1275993    | WT_5hasex | WT_veg | OK     | 43,9783  | 164,629  | 1,90435       | -3,29627      | 0,00097977 | 0,00771824 | yes |
| AN10644 | ChrV_A_nidulans_FGSC_A4:1299000-1299753    | WT_5hasex | WT_veg | OK     | 14,8956  | 42,5031  | 1,51268       | -2,38206      | 0,0172162  | 0,0794996  | no  |
| AN10645 | ChrV_A_nidulans_FGSC_A4:1269505-1270684    | WT_5hasex | WT_veg | OK     | 64,5883  | 253,239  | 1,97115       | -4,0991       | 4,1477E-05 | 0,00050924 | yes |
| AN10646 | ChrV_A_nidulans_FGSC_A4:1322131-1323298    | WT_5hasex | WT_veg | OK     | 49,45    | 181,638  | 1,87702       | -3,85307      | 0,00011665 | 0,00125667 | yes |
| AN10648 | ChrV_A_nidulans_FGSC_A4:1423978-1425886    | WT_5hasex | WT_veg | OK     | 28,2863  | 36,4995  | 0,367776      | -0,734209     | 0,462822   | 0,722153   | no  |
| AN10649 | ChrV_A_nidulans_FGSC_A4:1599496-1605059    | WT_5hasex | WT_veg | OK     | 5,95558  | 11,8283  | 0,989924      | -1,87991      | 0,0601205  | 0,202613   | no  |
| AN1065  | ChrVIII_A_nidulans_FGSC_A4:1627955-1629792 | WT_5hasex | WT_veg | OK     | 63,7226  | 150,098  | 1,23603       | -2,57811      | 0,00993428 | 0,0518657  | no  |
| AN10650 | ChrV_A_nidulans_FGSC_A4:1608649-1610432    | WT_5hasex | WT_veg | NOTEST | 0        | 0,209441 | 1.79769e+308  | 1.79769e+308  | 0,21742    | 1          | no  |
| AN10651 | ChrV_A_nidulans_FGSC_A4:1489962-1492761    | WT_5hasex | WT_veg | OK     | 332,127  | 362,46   | 0,126084      | -0,252058     | 0,800996   | 0,919698   | no  |
| AN10652 | ChrV_A_nidulans_FGSC_A4:1422382-1423526    | WT_5hasex | WT_veg | OK     | 73,2095  | 119,457  | 0,70639       | -1,36744      | 0,171489   | 0,413286   | no  |
| AN10654 | ChrV_A_nidulans_FGSC_A4:1607766-1608435    | WT_5hasex | WT_veg | NOTEST | 0,659533 | 0,746154 | 0,178029      | -0,0368367    | 0,970615   | 1          | no  |
| AN10656 | ChrV_A_nidulans_FGSC_A4:3309892-3312323    | WT_5hasex | WT_veg | NOTEST | 1,26399  | 0,256772 | -2,29942      | 1,56117       | 0,118483   | 1          | no  |
| AN10657 | ChrV_A_nidulans_FGSC_A4:3253416-3255125    | WT_5hasex | WT_veg | NOTEST | 0,388106 | 0,606493 | 0,644042      | -0,483279     | 0,628897   | 1          | no  |
| AN10658 | ChrV_A_nidulans_FGSC_A4:3240914-3242699    | WT_5hasex | WT_veg | NOTEST | 0        | 0        | 0             | 0             | 1          | 1          | no  |
| AN10659 | ChrV_A_nidulans_FGSC_A4:3215429-3217493    | WT_5hasex | WT_veg | NOTEST | 0,293745 | 1,06539  | 1,85874       | -1,64907      | 0,0991338  | 1          | no  |
| AN1066  | ChrVIII_A_nidulans_FGSC_A4:1626434-1627741 | WT_5hasex | WT_veg | OK     | 1249,41  | 7519,33  | 2,58935       | -3,03112      | 0,00243652 | 0,0164576  | yes |
| AN10661 | ChrV_A_nidulans_FGSC_A4:3107798-3110187    | WT_5hasex | WT_veg | OK     | 47,1236  | 102,026  | 1,11442       | -2,30172      | 0,0213512  | 0,093682   | no  |

## Supplementary table 1

|         |                                            |           |        |        |          |          |               |               |            |            |      |
|---------|--------------------------------------------|-----------|--------|--------|----------|----------|---------------|---------------|------------|------------|------|
| AN10662 | ChrV_A_nidulans_FGSC_A4:3068530-3070129    | WT_5hasex | WT_veg | OK     | 5,37652  | 20,442   | 1,92679       | -2,89977      | 0,00373439 | 0,0234634  | yes  |
| AN10663 | ChrV_A_nidulans_FGSC_A4:3110467-3112804    | WT_5hasex | WT_veg | OK     | 71,4214  | 94,2493  | 0,400126      | -0,82137      | 0,411435   | 0,681352   | no   |
| AN10664 | ChrV_A_nidulans_FGSC_A4:3070775-3072219    | WT_5hasex | WT_veg | OK     | 386,411  | 682,332  | 0,82034       | -1,47383      | 0,140527   | 0,363362   | no   |
| AN10665 | ChrV_A_nidulans_FGSC_A4:3307574-3309561    | WT_5hasex | WT_veg | NOTEST | 0,106937 | 0        | -1.79769e+308 | -1.79769e+308 | 0,165569   |            | 1 no |
| AN10666 | ChrV_A_nidulans_FGSC_A4:3256124-3257080    | WT_5hasex | WT_veg | NOTEST | 0        | 0        | 0             | 0             | 1          |            | 1 no |
| AN10667 | ChrV_A_nidulans_FGSC_A4:3257355-3258458    | WT_5hasex | WT_veg | NOTEST | 0,503303 | 0,358135 | -0,490923     | 0,268492      | 0,788321   |            | 1 no |
| AN10668 | ChrV_A_nidulans_FGSC_A4:3238639-3239626    | WT_5hasex | WT_veg | NOTEST | 0        | 0        | 0             | 0             | 1          |            | 1 no |
| AN10669 | ChrV_A_nidulans_FGSC_A4:3217599-3218392    | WT_5hasex | WT_veg | NOTEST | 0,444384 | 0        | -1.79769e+308 | -1.79769e+308 | 0,23809    |            | 1 no |
| AN1067  | ChrVIII_A_nidulans_FGSC_A4:1625827-1626293 | WT_5hasex | WT_veg | OK     | 9,22249  | 28,7     | 1,63782       | -2,1344       | 0,0328102  | 0,129995   | no   |
| AN10670 | ChrV_A_nidulans_FGSC_A4:3196297-3198262    | WT_5hasex | WT_veg | OK     | 4,86011  | 7,10169  | 0,547173      | -0,818112     | 0,413293   | 0,682746   | no   |
| AN10671 | ChrV_A_nidulans_FGSC_A4:2976879-2978149    | WT_5hasex | WT_veg | NOTEST | 0,440222 | 0        | -1.79769e+308 | -1.79769e+308 | 0,0966285  |            | 1 no |
| AN10672 | ChrV_A_nidulans_FGSC_A4:2960396-2963065    | WT_5hasex | WT_veg | OK     | 2,21205  | 3,88647  | 0,813078      | -1,12444      | 0,260826   | 0,531241   | no   |
| AN10673 | ChrV_A_nidulans_FGSC_A4:2820864-2824214    | WT_5hasex | WT_veg | OK     | 30,799   | 35,1306  | 0,189846      | -0,39467      | 0,693086   | 0,865483   | no   |
| AN10675 | ChrV_A_nidulans_FGSC_A4:2651271-2652370    | WT_5hasex | WT_veg | OK     | 58,5447  | 93,1828  | 0,670526      | -1,33126      | 0,183102   | 0,430826   | no   |
| AN10676 | ChrV_A_nidulans_FGSC_A4:2549711-2551257    | WT_5hasex | WT_veg | OK     | 51,8072  | 181,972  | 1,81249       | -3,76829      | 0,00016437 | 0,00168293 | yes  |
| AN10677 | ChrV_A_nidulans_FGSC_A4:2510076-2514025    | WT_5hasex | WT_veg | OK     | 10,9238  | 16,95    | 0,633809      | -1,18609      | 0,235585   | 0,500898   | no   |
| AN10678 | ChrV_A_nidulans_FGSC_A4:2480740-2481600    | WT_5hasex | WT_veg | OK     | 186,352  | 2519,42  | 3,75699       | -7,41965      | 1,1746E-13 | 7,3715E-12 | yes  |
| AN1068  | ChrVIII_A_nidulans_FGSC_A4:1623614-1625196 | WT_5hasex | WT_veg | OK     | 20,7864  | 74,037   | 1,8326        | -3,31776      | 0,00090742 | 0,00724306 | yes  |
| AN10680 | ChrV_A_nidulans_FGSC_A4:2818690-2820191    | WT_5hasex | WT_veg | OK     | 30,9056  | 72,2999  | 1,22613       | -2,39352      | 0,0166874  | 0,0776602  | no   |
| AN10681 | ChrV_A_nidulans_FGSC_A4:2652845-2654009    | WT_5hasex | WT_veg | OK     | 1106,61  | 2094,57  | 0,920505      | -1,61938      | 0,105365   | 0,300381   | no   |
| AN10682 | ChrV_A_nidulans_FGSC_A4:2506273-2509571    | WT_5hasex | WT_veg | OK     | 70,5119  | 103,479  | 0,553405      | -1,13016      | 0,258409   | 0,528332   | no   |
| AN10683 | ChrV_A_nidulans_FGSC_A4:2479410-2480653    | WT_5hasex | WT_veg | OK     | 38,842   | 71,2022  | 0,874304      | -1,68719      | 0,0915666  | 0,272103   | no   |
| AN10685 | ChrV_A_nidulans_FGSC_A4:2505302-2505646    | WT_5hasex | WT_veg | OK     | 13,6366  | 29,7962  | 1,12765       | -1,2371       | 0,216048   | 0,476028   | no   |
| AN10686 | ChrV_A_nidulans_FGSC_A4:2510076-2514025    | WT_5hasex | WT_veg | OK     | 49,0649  | 35,4459  | -0,469074     | 0,926271      | 0,354305   | 0,62991    | no   |
| AN10687 | ChrV_A_nidulans_FGSC_A4:2707189-2708401    | WT_5hasex | WT_veg | NOTEST | 1,03501  | 3,6653   | 1,82429       | -1,3241       | 0,18547    |            | 1 no |
| AN10688 | ChrV_A_nidulans_FGSC_A4:2976196-2976863    | WT_5hasex | WT_veg | NOTEST | 0        | 0        | 0             | 0             | 1          |            | 1 no |
| AN10689 | ChrV_A_nidulans_FGSC_A4:2546579-2549095    | WT_5hasex | WT_veg | OK     | 48,0824  | 44,63    | -0,107494     | 0,220439      | 0,82553    | 0,93039    | no   |
| AN1069  | ChrVIII_A_nidulans_FGSC_A4:1621134-1622264 | WT_5hasex | WT_veg | OK     | 78,7132  | 117,627  | 0,579536      | -1,169        | 0,242405   | 0,509058   | no   |
| AN10690 | ChrV_A_nidulans_FGSC_A4:2447377-2448229    | WT_5hasex | WT_veg | OK     | 7,12816  | 41,7607  | 2,55055       | -3,5526       | 0,00038144 | 0,00345039 | yes  |
| AN10691 | ChrV_A_nidulans_FGSC_A4:2434819-2437082    | WT_5hasex | WT_veg | OK     | 7,48508  | 23,99    | 1,68034       | -2,56728      | 0,01025    | 0,0531224  | no   |
| AN10692 | ChrV_A_nidulans_FGSC_A4:2424654-2426353    | WT_5hasex | WT_veg | NOTEST | 0,505333 | 1,9708   | 1,96347       | -1,59854      | 0,109922   |            | 1 no |
| AN10693 | ChrV_A_nidulans_FGSC_A4:2409262-2410746    | WT_5hasex | WT_veg | OK     | 5,69826  | 6,77519  | 0,249738      | -0,365103     | 0,715034   | 0,877656   | no   |
| AN10694 | ChrV_A_nidulans_FGSC_A4:2403020-2404948    | WT_5hasex | WT_veg | OK     | 16,9654  | 36,9239  | 1,12196       | -2,1071       | 0,0351091  | 0,136858   | no   |
| AN10695 | ChrV_A_nidulans_FGSC_A4:2408197-2409235    | WT_5hasex | WT_veg | OK     | 49,9983  | 220,273  | 2,13934       | -4,2674       | 1,9777E-05 | 0,00026363 | yes  |
| AN10696 | ChrV_A_nidulans_FGSC_A4:2405709-2406487    | WT_5hasex | WT_veg | OK     | 41,6795  | 61,2436  | 0,555221      | -1,01268      | 0,311213   | 0,587576   | no   |
| AN10697 | ChrV_A_nidulans_FGSC_A4:2448366-2450775    | WT_5hasex | WT_veg | OK     | 2,56784  | 4,75719  | 0,889556      | -1,24427      | 0,213402   | 0,472593   | no   |
| AN10698 | ChrV_A_nidulans_FGSC_A4:2433572-2434803    | WT_5hasex | WT_veg | OK     | 10,8693  | 43,897   | 2,01387       | -2,83797      | 0,00454008 | 0,027539   | yes  |
| AN10699 | ChrV_A_nidulans_FGSC_A4:2426829-2429153    | WT_5hasex | WT_veg | OK     | 4,67737  | 92,4615  | 4,30508       | -6,95796      | 3,4524E-12 | 1,7702E-10 | yes  |
| AN1070  | ChrVIII_A_nidulans_FGSC_A4:1617614-1618689 | WT_5hasex | WT_veg | OK     | 8,86256  | 21,335   | 1,26742       | -1,95976      | 0,0500236  | 0,177609   | no   |
| AN10700 | ChrV_A_nidulans_FGSC_A4:2106701-2109184    | WT_5hasex | WT_veg | OK     | 8,42371  | 32,6065  | 1,95263       | -3,01565      | 0,00256432 | 0,0171689  | yes  |
| AN10701 | ChrV_A_nidulans_FGSC_A4:2051029-2052425    | WT_5hasex | WT_veg | OK     | 153,961  | 618,175  | 2,00545       | -4,09522      | 4,2177E-05 | 0,000517   | yes  |
| AN10702 | ChrV_A_nidulans_FGSC_A4:1955400-1957371    | WT_5hasex | WT_veg | OK     | 47,4893  | 34,2695  | -0,470679     | 0,954134      | 0,340016   | 0,615756   | no   |
| AN10703 | ChrV_A_nidulans_FGSC_A4:1934664-1935934    | WT_5hasex | WT_veg | OK     | 17,1549  | 29,1763  | 0,766176      | -1,38547      | 0,16591    | 0,404467   | no   |
| AN10705 | ChrV_A_nidulans_FGSC_A4:1760109-1761145    | WT_5hasex | WT_veg | OK     | 137,04   | 261,404  | 0,931686      | -1,85945      | 0,0629639  | 0,209023   | no   |
| AN10706 | ChrV_A_nidulans_FGSC_A4:1753937-1755003    | WT_5hasex | WT_veg | OK     | 220,967  | 720,047  | 1,70426       | -3,36091      | 0,00077685 | 0,00632907 | yes  |
| AN10707 | ChrV_A_nidulans_FGSC_A4:1743202-1747558    | WT_5hasex | WT_veg | OK     | 12,7048  | 11,1583  | -0,187259     | 0,375617      | 0,707202   | 0,873574   | no   |
| AN10708 | ChrV_A_nidulans_FGSC_A4:1713122-1714200    | WT_5hasex | WT_veg | OK     | 213,247  | 272,383  | 0,353111      | -0,721428     | 0,470647   | 0,728383   | no   |
| AN1071  | ChrVIII_A_nidulans_FGSC_A4:1606559-1610250 | WT_5hasex | WT_veg | NOTEST | 1,43024  | 2,25337  | 0,655825      | -0,857919     | 0,390937   |            | 1 no |
| AN10710 | ChrV_A_nidulans_FGSC_A4:1752202-1753512    | WT_5hasex | WT_veg | OK     | 180,845  | 198,246  | 0,13254       | -0,268502     | 0,788313   | 0,913646   | no   |
| AN10711 | ChrV_A_nidulans_FGSC_A4:1750901-1752038    | WT_5hasex | WT_veg | OK     | 66,0715  | 113,146  | 0,77609       | -1,58293      | 0,113436   | 0,315565   | no   |
| AN10712 | ChrV_A_nidulans_FGSC_A4:2049662-2050743    | WT_5hasex | WT_veg | OK     | 228,482  | 840,723  | 1,87843       | -3,67626      | 0,00023668 | 0,00230228 | yes  |
| AN10713 | ChrV_A_nidulans_FGSC_A4:1952597-1953898    | WT_5hasex | WT_veg | OK     | 75,3655  | 181,073  | 1,27009       | -2,62107      | 0,00876534 | 0,046946   | yes  |
| AN10714 | ChrV_A_nidulans_FGSC_A4:1933059-1934344    | WT_5hasex | WT_veg | OK     | 10,4075  | 33,2604  | 1,67618       | -2,7182       | 0,00656382 | 0,0372168  | yes  |

## Supplementary table 1

|         |                                            |           |        |        |          |          |            |           |            |            |     |
|---------|--------------------------------------------|-----------|--------|--------|----------|----------|------------|-----------|------------|------------|-----|
| AN10715 | ChrV_A_nidulans_FGSC_A4:1747953-1750142    | WT_5hasex | WT_veg | OK     | 1,89396  | 4,03505  | 1,09118    | -1,25616  | 0,209059   | 0,466762   | no  |
| AN10716 | ChrV_A_nidulans_FGSC_A4:1711823-1712805    | WT_5hasex | WT_veg | OK     | 51,0875  | 129,055  | 1,33694    | -2,67503  | 0,00747221 | 0,0412819  | yes |
| AN10717 | ChrV_A_nidulans_FGSC_A4:1715604-1716172    | WT_5hasex | WT_veg | OK     | 65,8656  | 240,682  | 1,86953    | -3,49967  | 0,00046584 | 0,00410198 | yes |
| AN10719 | ChrV_A_nidulans_FGSC_A4:1677663-1678395    | WT_5hasex | WT_veg | OK     | 232,841  | 194,49   | -0,259648  | 0,533697  | 0,593552   | 0,80896    | no  |
| AN1072  | ChrVIII_A_nidulans_FGSC_A4:1602367-1603275 | WT_5hasex | WT_veg | OK     | 3,85256  | 3,72158  | -0,0499013 | 0,0546962 | 0,95638    | 0,98379    | no  |
| AN10720 | ChrV_A_nidulans_FGSC_A4:2225728-2227607    | WT_5hasex | WT_veg | OK     | 7,24732  | 13,2886  | 0,874668   | -1,35493  | 0,175438   | 0,41982    | no  |
| AN10721 | ChrV_A_nidulans_FGSC_A4:1680305-1680938    | WT_5hasex | WT_veg | OK     | 32,7775  | 64,046   | 0,966401   | -1,67445  | 0,0940421  | 0,277243   | no  |
| AN10722 | ChrV_A_nidulans_FGSC_A4:2025231-2029057    | WT_5hasex | WT_veg | OK     | 20,4636  | 36,7685  | 0,84541    | -1,73141  | 0,0833787  | 0,25524    | no  |
| AN10723 | ChrV_A_nidulans_FGSC_A4:2109488-2110560    | WT_5hasex | WT_veg | OK     | 21,9798  | 55,3572  | 1,33259    | -2,39186  | 0,0167631  | 0,0779361  | no  |
| AN10724 | ChrV_A_nidulans_FGSC_A4:1759577-1760105    | WT_5hasex | WT_veg | OK     | 106,024  | 168,975  | 0,672418   | -1,31739  | 0,187709   | 0,437415   | no  |
| AN10726 | ChrV_A_nidulans_FGSC_A4:1793441-1793796    | WT_5hasex | WT_veg | OK     | 21,8881  | 48,5697  | 1,14991    | -1,71189  | 0,0869177  | 0,262804   | no  |
| AN10728 | ChrV_A_nidulans_FGSC_A4:1722550-1723412    | WT_5hasex | WT_veg | OK     | 11,1587  | 23,2784  | 1,06082    | -1,54137  | 0,123227   | 0,333265   | no  |
| AN1073  | ChrVIII_A_nidulans_FGSC_A4:1597293-1599355 | WT_5hasex | WT_veg | NOTEST | 0,249026 | 0,446115 | 0,84112    | -0,486088 | 0,626905   | 1          | no  |
| AN10730 | ChrV_A_nidulans_FGSC_A4:1766558-1766961    | WT_5hasex | WT_veg | OK     | 1,25989  | 7,53197  | 2,57973    | -1,66758  | 0,0953999  | 0,280104   | no  |
| AN10731 | ChrV_A_nidulans_FGSC_A4:2038006-2038452    | WT_5hasex | WT_veg | OK     | 64,3789  | 173,219  | 1,42794    | -2,43647  | 0,0148316  | 0,0709194  | no  |
| AN10732 | ChrI_A_nidulans_FGSC_A4:2188556-2191623    | WT_5hasex | WT_veg | OK     | 15,0219  | 27,4988  | 0,872305   | -1,70742  | 0,0877449  | 0,264466   | no  |
| AN10733 | ChrI_A_nidulans_FGSC_A4:2132521-2133685    | WT_5hasex | WT_veg | OK     | 36,3638  | 25,4587  | -0,514344  | 1,01081   | 0,312105   | 0,588501   | no  |
| AN10734 | ChrI_A_nidulans_FGSC_A4:2067939-2076455    | WT_5hasex | WT_veg | OK     | 12,7818  | 35,9279  | 1,49102    | -3,15099  | 0,00162717 | 0,0117582  | yes |
| AN10735 | ChrI_A_nidulans_FGSC_A4:2013980-2025264    | WT_5hasex | WT_veg | OK     | 9,47788  | 20,7208  | 1,12844    | -2,22151  | 0,0263162  | 0,109725   | no  |
| AN10736 | ChrI_A_nidulans_FGSC_A4:1994432-1996177    | WT_5hasex | WT_veg | OK     | 123,42   | 492,394  | 1,99623    | -4,08373  | 4,4318E-05 | 0,0005397  | yes |
| AN10737 | ChrI_A_nidulans_FGSC_A4:2175156-2176575    | WT_5hasex | WT_veg | OK     | 20,8536  | 30,8363  | 0,56433    | -1,07565  | 0,282083   | 0,55587    | no  |
| AN10738 | ChrI_A_nidulans_FGSC_A4:2187456-2188066    | WT_5hasex | WT_veg | OK     | 49,4779  | 147,576  | 1,57661    | -2,95262  | 0,00315089 | 0,0203667  | yes |
| AN1074  | ChrVIII_A_nidulans_FGSC_A4:1594948-1595796 | WT_5hasex | WT_veg | OK     | 181,613  | 408,023  | 1,16778    | -2,38267  | 0,0171878  | 0,0794034  | no  |
| AN10740 | ChrI_A_nidulans_FGSC_A4:2066331-2067601    | WT_5hasex | WT_veg | OK     | 1659,34  | 2919,24  | 0,814984   | -1,29225  | 0,19627    | 0,449182   | no  |
| AN10741 | ChrI_A_nidulans_FGSC_A4:2134561-2135287    | WT_5hasex | WT_veg | OK     | 293,024  | 139,209  | -1,07377   | 2,10962   | 0,0348911  | 0,136273   | no  |
| AN10742 | ChrI_A_nidulans_FGSC_A4:1947499-1948040    | WT_5hasex | WT_veg | OK     | 19,9154  | 11,7559  | -0,760496  | 1,11927   | 0,263027   | 0,533826   | no  |
| AN10743 | ChrI_A_nidulans_FGSC_A4:1961959-1963213    | WT_5hasex | WT_veg | OK     | 114,486  | 210,25   | 0,876926   | -1,81993  | 0,0687704  | 0,222657   | no  |
| AN10745 | ChrI_A_nidulans_FGSC_A4:2101158-2103220    | WT_5hasex | WT_veg | OK     | 104,552  | 275,549  | 1,39809    | -2,88768  | 0,00388095 | 0,0241905  | yes |
| AN10746 | ChrI_A_nidulans_FGSC_A4:2099506-2100878    | WT_5hasex | WT_veg | OK     | 5,12362  | 11,3106  | 1,14244    | -1,63021  | 0,103057   | 0,295818   | no  |
| AN10747 | ChrI_A_nidulans_FGSC_A4:2097285-2099202    | WT_5hasex | WT_veg | OK     | 64,2117  | 223,566  | 1,79979    | -3,78242  | 0,00015531 | 0,00160114 | yes |
| AN10748 | ChrI_A_nidulans_FGSC_A4:1944698-1945184    | WT_5hasex | WT_veg | OK     | 8,23771  | 9,42551  | 0,194327   | -0,231618 | 0,816835   | 0,926659   | no  |
| AN1075  | ChrVIII_A_nidulans_FGSC_A4:1591625-1594299 | WT_5hasex | WT_veg | OK     | 22,266   | 29,7004  | 0,41564    | -0,846672 | 0,397178   | 0,670192   | no  |
| AN10750 | ChrI_A_nidulans_FGSC_A4:2025477-2031384    | WT_5hasex | WT_veg | OK     | 16,7078  | 27,1794  | 0,701989   | -1,38234  | 0,166867   | 0,405894   | no  |
| AN10751 | ChrI_A_nidulans_FGSC_A4:1993322-1994401    | WT_5hasex | WT_veg | OK     | 100,814  | 330,395  | 1,7125     | -3,5815   | 0,00034163 | 0,00314398 | yes |
| AN10752 | ChrI_A_nidulans_FGSC_A4:1960194-1961793    | WT_5hasex | WT_veg | OK     | 100,505  | 307,368  | 1,6127     | -3,34079  | 0,00083541 | 0,00673599 | yes |
| AN10753 | ChrI_A_nidulans_FGSC_A4:1801787-1802644    | WT_5hasex | WT_veg | OK     | 51,5215  | 82,2019  | 0,673996   | -1,33323  | 0,182458   | 0,429819   | no  |
| AN10754 | ChrI_A_nidulans_FGSC_A4:1789215-1791781    | WT_5hasex | WT_veg | OK     | 49,9077  | 69,2526  | 0,472606   | -0,980273 | 0,326951   | 0,603262   | no  |
| AN10755 | ChrI_A_nidulans_FGSC_A4:1762541-1767206    | WT_5hasex | WT_veg | OK     | 19,0019  | 30,8192  | 0,697685   | -1,40737  | 0,159317   | 0,394412   | no  |
| AN10756 | ChrI_A_nidulans_FGSC_A4:1674641-1678733    | WT_5hasex | WT_veg | OK     | 18,1658  | 27,0029  | 0,571888   | -1,13288  | 0,257265   | 0,527121   | no  |
| AN10757 | ChrI_A_nidulans_FGSC_A4:1791943-1795600    | WT_5hasex | WT_veg | OK     | 11,1418  | 22,9417  | 1,04198    | -2,0816   | 0,0373793  | 0,143479   | no  |
| AN10758 | ChrI_A_nidulans_FGSC_A4:1679577-1681017    | WT_5hasex | WT_veg | OK     | 10,6337  | 34,4469  | 1,69573    | -2,90766  | 0,00364142 | 0,0229783  | yes |
| AN10759 | ChrI_A_nidulans_FGSC_A4:1690608-1691166    | WT_5hasex | WT_veg | OK     | 19,9339  | 53,1107  | 1,41378    | -2,14086  | 0,0322856  | 0,128435   | no  |
| AN1076  | ChrVIII_A_nidulans_FGSC_A4:1589940-1591371 | WT_5hasex | WT_veg | OK     | 19,9552  | 10,0844  | -0,98464   | 1,7613    | 0,0781876  | 0,243887   | no  |
| AN10760 | ChrI_A_nidulans_FGSC_A4:1802866-1805907    | WT_5hasex | WT_veg | OK     | 52,3     | 71,1625  | 0,444307   | -0,922739 | 0,356143   | 0,631541   | no  |
| AN10761 | ChrI_A_nidulans_FGSC_A4:1705039-1705583    | WT_5hasex | WT_veg | OK     | 2514,3   | 11800,5  | 2,23062    | -3,49876  | 0,00046743 | 0,00411324 | yes |
| AN10762 | ChrI_A_nidulans_FGSC_A4:1768397-1770485    | WT_5hasex | WT_veg | OK     | 29,1743  | 38,1904  | 0,388512   | -0,773404 | 0,439283   | 0,703648   | no  |
| AN10764 | ChrI_A_nidulans_FGSC_A4:1623697-1624593    | WT_5hasex | WT_veg | OK     | 4,82516  | 8,20709  | 0,766293   | -0,959881 | 0,337115   | 0,613056   | no  |
| AN10765 | ChrI_A_nidulans_FGSC_A4:1493794-1495131    | WT_5hasex | WT_veg | OK     | 217,648  | 392,151  | 0,849415   | -1,63954  | 0,1011     | 0,291733   | no  |
| AN10766 | ChrI_A_nidulans_FGSC_A4:1478704-1479704    | WT_5hasex | WT_veg | NOTEST | 0        | 0        | 0          | 0         | 1          | 1          | no  |
| AN10768 | ChrI_A_nidulans_FGSC_A4:1477131-1478601    | WT_5hasex | WT_veg | NOTEST | 0        | 0        | 0          | 0         | 1          | 1          | no  |
| AN10769 | ChrI_A_nidulans_FGSC_A4:1319827-1323371    | WT_5hasex | WT_veg | OK     | 20,1478  | 79,3222  | 1,9771     | -4,05879  | 4,9328E-05 | 0,00059123 | yes |
| AN1077  | ChrVIII_A_nidulans_FGSC_A4:1585482-1587967 | WT_5hasex | WT_veg | OK     | 5,30899  | 1,20099  | -2,14421   | 2,66937   | 0,00759929 | 0,0418472  | yes |
| AN10770 | ChrI_A_nidulans_FGSC_A4:1257568-1258599    | WT_5hasex | WT_veg | NOTEST | 1,59113  | 3,46337  | 1,12213    | -1,12788  | 0,25937    | 1          | no  |

## Supplementary table 1

|         |                                            |           |        |        |          |          |               |               |            |            |     |
|---------|--------------------------------------------|-----------|--------|--------|----------|----------|---------------|---------------|------------|------------|-----|
| AN10771 | ChrI_A_nidulans_FGSC_A4:1323745-1325376    | WT_5hasex | WT_veg | OK     | 50,8803  | 279,815  | 2,45929       | -5,10593      | 3,2917E-07 | 6,8205E-06 | yes |
| AN10773 | ChrI_A_nidulans_FGSC_A4:1242542-1243031    | WT_5hasex | WT_veg | OK     | 5,629    | 75,8191  | 3,75161       | -5,02908      | 4,9285E-07 | 9,7384E-06 | yes |
| AN10775 | ChrI_A_nidulans_FGSC_A4:1255783-1257297    | WT_5hasex | WT_veg | OK     | 2,26945  | 8,67928  | 1,93523       | -2,58982      | 0,00960263 | 0,0504458  | no  |
| AN10777 | ChrI_A_nidulans_FGSC_A4:1000668-1002276    | WT_5hasex | WT_veg | OK     | 6,20562  | 11,588   | 0,900984      | -1,38193      | 0,166994   | 0,406089   | no  |
| AN10778 | ChrI_A_nidulans_FGSC_A4:973326-975178      | WT_5hasex | WT_veg | OK     | 58,7977  | 152,842  | 1,37821       | -2,67118      | 0,00755846 | 0,0416837  | yes |
| AN10779 | ChrI_A_nidulans_FGSC_A4:923606-925852      | WT_5hasex | WT_veg | OK     | 15,6429  | 26,5085  | 0,760948      | -1,44878      | 0,1474     | 0,374965   | no  |
| AN1078  | ChrVIII_A_nidulans_FGSC_A4:1583652-1584521 | WT_5hasex | WT_veg | NOTEST | 0,257359 | 3,15791  | 3,61712       | -1,70466      | 0,088257   | 1          | no  |
| AN10780 | ChrI_A_nidulans_FGSC_A4:898258-900309      | WT_5hasex | WT_veg | OK     | 13,3506  | 30,2861  | 1,18175       | -2,15114      | 0,0314651  | 0,125971   | no  |
| AN10781 | ChrI_A_nidulans_FGSC_A4:893705-894614      | WT_5hasex | WT_veg | OK     | 79,909   | 155,833  | 0,963566      | -1,97929      | 0,0477836  | 0,172176   | no  |
| AN10782 | ChrI_A_nidulans_FGSC_A4:880687-881831      | WT_5hasex | WT_veg | OK     | 70,1543  | 1242,14  | 4,14615       | -8,3601       | 0          | 0          | yes |
| AN10783 | ChrI_A_nidulans_FGSC_A4:999111-1000243     | WT_5hasex | WT_veg | OK     | 120,246  | 268,79   | 1,1605        | -2,31298      | 0,0207237  | 0,091604   | no  |
| AN10784 | ChrI_A_nidulans_FGSC_A4:895053-896716      | WT_5hasex | WT_veg | OK     | 12,6215  | 15,9272  | 0,335607      | -0,590505     | 0,554852   | 0,785141   | no  |
| AN10785 | ChrI_A_nidulans_FGSC_A4:879426-880375      | WT_5hasex | WT_veg | OK     | 47,823   | 101,018  | 1,07884       | -2,12097      | 0,0339245  | 0,133462   | no  |
| AN10787 | ChrI_A_nidulans_FGSC_A4:1150320-1151669    | WT_5hasex | WT_veg | OK     | 2,4122   | 15,2715  | -0,659508     | 0,621694      | 0,534143   | 0,772355   | no  |
| AN10788 | ChrI_A_nidulans_FGSC_A4:969569-972688      | WT_5hasex | WT_veg | OK     | 17,0191  | 31,5395  | 0,890004      | -1,80127      | 0,0716601  | 0,229265   | no  |
| AN10789 | ChrI_A_nidulans_FGSC_A4:919858-922470      | WT_5hasex | WT_veg | OK     | 5,86966  | 11,1321  | 0,923381      | -1,48016      | 0,13883    | 0,360544   | no  |
| AN1079  | ChrVIII_A_nidulans_FGSC_A4:1577373-1579771 | WT_5hasex | WT_veg | OK     | 12,0893  | 30,6463  | 1,34198       | -2,5665       | 0,0102729  | 0,0532149  | no  |
| AN10790 | ChrI_A_nidulans_FGSC_A4:897552-898032      | WT_5hasex | WT_veg | OK     | 27,1106  | 25,4817  | -0,0893921    | 0,136223      | 0,891645   | 0,958795   | no  |
| AN10791 | ChrI_A_nidulans_FGSC_A4:858479-860859      | WT_5hasex | WT_veg | OK     | 23,0236  | 34,4897  | 0,583053      | -1,17421      | 0,24031    | 0,506099   | no  |
| AN10792 | ChrI_A_nidulans_FGSC_A4:847628-849552      | WT_5hasex | WT_veg | OK     | 45,8523  | 165,26   | 1,84967       | -3,85253      | 0,00011691 | 0,00125895 | yes |
| AN10793 | ChrI_A_nidulans_FGSC_A4:834553-835804      | WT_5hasex | WT_veg | OK     | 18,3493  | 33,9279  | 0,886746      | -1,56922      | 0,116597   | 0,321236   | no  |
| AN10794 | ChrI_A_nidulans_FGSC_A4:853836-857632      | WT_5hasex | WT_veg | OK     | 8,75811  | 26,6659  | 1,60631       | -3,13871      | 0,00169693 | 0,0121712  | yes |
| AN10795 | ChrI_A_nidulans_FGSC_A4:845032-846749      | WT_5hasex | WT_veg | OK     | 7,32445  | 23,4786  | 1,68055       | -2,5573       | 0,0105487  | 0,0543161  | no  |
| AN10796 | ChrI_A_nidulans_FGSC_A4:832650-834344      | WT_5hasex | WT_veg | NOTEST | 1,13135  | 1,39245  | 0,299579      | -0,22242      | 0,823987   | 1          | no  |
| AN10797 | ChrI_A_nidulans_FGSC_A4:661430-662667      | WT_5hasex | WT_veg | OK     | 98,5835  | 86,3677  | -0,190854     | 0,381751      | 0,702646   | 0,870965   | no  |
| AN10798 | ChrI_A_nidulans_FGSC_A4:577040-578346      | WT_5hasex | WT_veg | OK     | 26,2335  | 154,782  | 2,56076       | -4,97655      | 6,4729E-07 | 1,247E-05  | yes |
| AN10799 | ChrI_A_nidulans_FGSC_A4:528658-531107      | WT_5hasex | WT_veg | OK     | 13,5081  | 37,7043  | 1,4809        | -2,86628      | 0,00415328 | 0,0255776  | yes |
| AN1080  | ChrVIII_A_nidulans_FGSC_A4:1576282-1577153 | WT_5hasex | WT_veg | OK     | 12,7821  | 39,6783  | 1,63422       | -2,60514      | 0,0091836  | 0,0486936  | yes |
| AN10800 | ChrI_A_nidulans_FGSC_A4:486843-488349      | WT_5hasex | WT_veg | OK     | 28,3494  | 44,0353  | 0,635341      | -1,2553       | 0,20937    | 0,467186   | no  |
| AN10801 | ChrI_A_nidulans_FGSC_A4:461139-463960      | WT_5hasex | WT_veg | OK     | 15,5268  | 18,2118  | 0,230117      | -0,450353     | 0,652456   | 0,843094   | no  |
| AN10802 | ChrI_A_nidulans_FGSC_A4:730823-731405      | WT_5hasex | WT_veg | OK     | 29,1915  | 45,1103  | 0,627907      | -1,02462      | 0,305544   | 0,58159    | no  |
| AN10803 | ChrI_A_nidulans_FGSC_A4:744279-745111      | WT_5hasex | WT_veg | OK     | 1290,79  | 1201,9   | -0,102945     | 0,187518      | 0,851254   | 0,941462   | no  |
| AN10804 | ChrI_A_nidulans_FGSC_A4:662952-664402      | WT_5hasex | WT_veg | OK     | 36,5746  | 40,1688  | 0,135235      | -0,258206     | 0,796248   | 0,917396   | no  |
| AN10805 | ChrI_A_nidulans_FGSC_A4:665125-667566      | WT_5hasex | WT_veg | OK     | 7,21456  | 10,9429  | 0,601016      | -0,947493     | 0,343388   | 0,618843   | no  |
| AN10806 | ChrI_A_nidulans_FGSC_A4:574981-576731      | WT_5hasex | WT_veg | OK     | 35,8036  | 116,318  | 1,69989       | -3,43075      | 0,00060191 | 0,00510044 | yes |
| AN10807 | ChrI_A_nidulans_FGSC_A4:523273-526688      | WT_5hasex | WT_veg | OK     | 57,1772  | 97,985   | 0,777122      | -1,60603      | 0,108267   | 0,306191   | no  |
| AN10808 | ChrI_A_nidulans_FGSC_A4:488897-490661      | WT_5hasex | WT_veg | OK     | 10,3895  | 15,9739  | 0,620589      | -1,05877      | 0,289706   | 0,564461   | no  |
| AN10809 | ChrI_A_nidulans_FGSC_A4:464158-465163      | WT_5hasex | WT_veg | OK     | 94,2979  | 235,754  | 1,32199       | -2,65564      | 0,00791571 | 0,0431992  | yes |
| AN1081  | ChrVIII_A_nidulans_FGSC_A4:1574603-1575420 | WT_5hasex | WT_veg | OK     | 32,3074  | 87,292   | 1,43399       | -2,57691      | 0,00996893 | 0,0520052  | no  |
| AN10812 | ChrI_A_nidulans_FGSC_A4:64525-67115        | WT_5hasex | WT_veg | OK     | 2,52696  | 10,2004  | 2,01315       | -2,88858      | 0,00386985 | 0,0241472  | yes |
| AN10813 | ChrI_A_nidulans_FGSC_A4:10376-11942        | WT_5hasex | WT_veg | NOTEST | 0,454655 | 0,821305 | 0,853144      | -0,638285     | 0,523288   | 1          | no  |
| AN10814 | ChrI_A_nidulans_FGSC_A4:1882-4080          | WT_5hasex | WT_veg | NOTEST | 0        | 0        | 0             | 0             | 1          | 1          | no  |
| AN10815 | ChrI_A_nidulans_FGSC_A4:71209-72181        | WT_5hasex | WT_veg | OK     | 7,96655  | 14,7079  | 0,884568      | -1,16238      | 0,245081   | 0,512705   | no  |
| AN10816 | ChrI_A_nidulans_FGSC_A4:203166-203948      | WT_5hasex | WT_veg | OK     | 66,4326  | 75,1895  | 0,178639      | -0,303898     | 0,761206   | 0,901337   | no  |
| AN10818 | ChrI_A_nidulans_FGSC_A4:232509-232965      | WT_5hasex | WT_veg | NOTEST | 0,42775  | 0        | -1.79769e+308 | -1.79769e+308 | 0,165569   | 1          | no  |
| AN10819 | ChrI_A_nidulans_FGSC_A4:68003-70333        | WT_5hasex | WT_veg | OK     | 2,31928  | 4,31069  | 0,894239      | -1,18277      | 0,236902   | 0,502312   | no  |
| AN1082  | ChrVIII_A_nidulans_FGSC_A4:1572365-1574456 | WT_5hasex | WT_veg | OK     | 99,893   | 186,321  | 0,899333      | -1,82137      | 0,0685502  | 0,222205   | no  |
| AN10820 | ChrI_A_nidulans_FGSC_A4:12075-13418        | WT_5hasex | WT_veg | OK     | 5,31414  | 1,75901  | -1,59508      | 1,72256       | 0,084969   | 0,258613   | no  |
| AN10821 | ChrI_A_nidulans_FGSC_A4:4350-5615          | WT_5hasex | WT_veg | NOTEST | 0,211401 | 0        | -1.79769e+308 | -1.79769e+308 | 0,224063   | 1          | no  |
| AN10822 | ChrI_A_nidulans_FGSC_A4:2294271-2296488    | WT_5hasex | WT_veg | OK     | 43,6619  | 97,8553  | 1,16427       | -2,39486      | 0,0166266  | 0,0774322  | no  |
| AN10823 | ChrI_A_nidulans_FGSC_A4:2305056-2306350    | WT_5hasex | WT_veg | OK     | 38,255   | 115,766  | 1,59749       | -3,15275      | 0,0016174  | 0,0117     | yes |
| AN10824 | ChrI_A_nidulans_FGSC_A4:2333495-2336204    | WT_5hasex | WT_veg | OK     | 56,6512  | 113,251  | 0,999345      | -2,07897      | 0,0376201  | 0,144102   | no  |
| AN10825 | ChrI_A_nidulans_FGSC_A4:2353070-2354949    | WT_5hasex | WT_veg | OK     | 26,6632  | 31,1335  | 0,223619      | -0,429956     | 0,667228   | 0,851194   | no  |

## Supplementary table 1

|         |                                            |           |        |        |          |          |              |              |            |            |     |
|---------|--------------------------------------------|-----------|--------|--------|----------|----------|--------------|--------------|------------|------------|-----|
| AN10826 | ChrI_A_nidulans_FGSC_A4:2296746-2299444    | WT_5hasex | WT_veg | OK     | 58,8295  | 118,075  | 1,0051       | -1,89877     | 0,0575953  | 0,19616    | no  |
| AN10827 | ChrI_A_nidulans_FGSC_A4:2301603-2302315    | WT_5hasex | WT_veg | OK     | 63,018   | 153,421  | 1,28366      | -2,53719     | 0,0111748  | 0,0568318  | no  |
| AN10828 | ChrI_A_nidulans_FGSC_A4:2304109-2304783    | WT_5hasex | WT_veg | OK     | 547,024  | 971,575  | 0,828721     | -1,66681     | 0,0955516  | 0,2804     | no  |
| AN10829 | ChrI_A_nidulans_FGSC_A4:2270141-2271288    | WT_5hasex | WT_veg | OK     | 32,9504  | 45,5481  | 0,467093     | -0,903472    | 0,366276   | 0,641111   | no  |
| AN1083  | ChrVIII_A_nidulans_FGSC_A4:1571352-1572039 | WT_5hasex | WT_veg | OK     | 32,2497  | 59,0836  | 0,873473     | -1,57098     | 0,116188   | 0,320429   | no  |
| AN10830 | ChrI_A_nidulans_FGSC_A4:2421445-2421889    | WT_5hasex | WT_veg | OK     | 2,04568  | 11,2177  | 2,45512      | -2,3989      | 0,0164443  | 0,0767811  | no  |
| AN10832 | ChrI_A_nidulans_FGSC_A4:2336844-2339580    | WT_5hasex | WT_veg | OK     | 14,1219  | 13,7776  | -0,0356074   | 0,069074     | 0,944931   | 0,979356   | no  |
| AN10833 | ChrI_A_nidulans_FGSC_A4:2350542-2352393    | WT_5hasex | WT_veg | OK     | 13,5109  | 17,1368  | 0,342972     | -0,569647    | 0,568917   | 0,794658   | no  |
| AN10835 | ChrI_A_nidulans_FGSC_A4:2601209-2602210    | WT_5hasex | WT_veg | OK     | 17,6581  | 71,4697  | 2,017        | -3,49195     | 0,0004795  | 0,00420239 | yes |
| AN10836 | ChrI_A_nidulans_FGSC_A4:2647714-2649369    | WT_5hasex | WT_veg | NOTEST | 1,28965  | 3,66228  | 1,50576      | -1,75553     | 0,0791695  | 1          | no  |
| AN10837 | ChrI_A_nidulans_FGSC_A4:2693171-2695697    | WT_5hasex | WT_veg | OK     | 43,5378  | 388,924  | 3,15915      | -6,17304     | 6,6988E-10 | 2,4462E-08 | yes |
| AN10838 | ChrI_A_nidulans_FGSC_A4:2766938-2771233    | WT_5hasex | WT_veg | OK     | 22,2443  | 14,0469  | -0,663185    | 1,3095       | 0,190365   | 0,441214   | no  |
| AN10839 | ChrI_A_nidulans_FGSC_A4:2602457-2603767    | WT_5hasex | WT_veg | OK     | 87,0929  | 270,601  | 1,63554      | -3,25075     | 0,00115103 | 0,00881556 | yes |
| AN1084  | ChrVIII_A_nidulans_FGSC_A4:1569114-1570966 | WT_5hasex | WT_veg | OK     | 258,309  | 542,648  | 1,07092      | -2,03438     | 0,0419128  | 0,156067   | no  |
| AN10840 | ChrI_A_nidulans_FGSC_A4:2691580-2693089    | WT_5hasex | WT_veg | OK     | 17,2573  | 101,307  | 2,55346      | -4,64162     | 3,4569E-06 | 5,5739E-05 | yes |
| AN10841 | ChrI_A_nidulans_FGSC_A4:2571843-2573084    | WT_5hasex | WT_veg | OK     | 30,4853  | 34,3412  | 0,17183      | -0,327109    | 0,743586   | 0,892156   | no  |
| AN10842 | ChrI_A_nidulans_FGSC_A4:2646242-2647362    | WT_5hasex | WT_veg | OK     | 23,9572  | 55,2976  | 1,20675      | -2,14962     | 0,0315854  | 0,126279   | no  |
| AN10843 | ChrI_A_nidulans_FGSC_A4:2765658-2766589    | WT_5hasex | WT_veg | OK     | 32,4389  | 27,2546  | -0,251225    | 0,451769     | 0,651435   | 0,842504   | no  |
| AN10845 | ChrI_A_nidulans_FGSC_A4:2981119-2983706    | WT_5hasex | WT_veg | OK     | 2,44305  | 1,28461  | -0,927347    | 1,04077      | 0,297984   | 0,573174   | no  |
| AN10846 | ChrI_A_nidulans_FGSC_A4:3207539-3212351    | WT_5hasex | WT_veg | OK     | 7,695    | 10,6862  | 0,473756     | -0,914818    | 0,360287   | 0,634913   | no  |
| AN10847 | ChrI_A_nidulans_FGSC_A4:2954887-2955813    | WT_5hasex | WT_veg | OK     | 2251,29  | 10139,4  | 2,17115      | -3,14385     | 0,0016674  | 0,0120004  | yes |
| AN10848 | ChrI_A_nidulans_FGSC_A4:2978479-2980388    | WT_5hasex | WT_veg | OK     | 21,3676  | 56,9445  | 1,41413      | -2,60877     | 0,00908679 | 0,0482927  | yes |
| AN1085  | ChrVIII_A_nidulans_FGSC_A4:1565665-1568636 | WT_5hasex | WT_veg | OK     | 65,6915  | 95,7021  | 0,542843     | -1,11712     | 0,263944   | 0,534884   | no  |
| AN10851 | ChrI_A_nidulans_FGSC_A4:3005409-3005988    | WT_5hasex | WT_veg | OK     | 8,6257   | 16,1898  | 0,908368     | -1,26018     | 0,207604   | 0,46485    | no  |
| AN10854 | ChrI_A_nidulans_FGSC_A4:3372847-3374747    | WT_5hasex | WT_veg | OK     | 57,5712  | 78,561   | 0,448465     | -0,921356    | 0,356865   | 0,632099   | no  |
| AN10855 | ChrI_A_nidulans_FGSC_A4:3383450-3385647    | WT_5hasex | WT_veg | OK     | 14,4512  | 27,6615  | 0,93669      | -1,75855     | 0,0786533  | 0,244837   | no  |
| AN10856 | ChrI_A_nidulans_FGSC_A4:3529534-3533165    | WT_5hasex | WT_veg | OK     | 28,1116  | 93,5106  | 1,73397      | -3,58824     | 0,00033291 | 0,00307459 | yes |
| AN10857 | ChrI_A_nidulans_FGSC_A4:3386073-3386799    | WT_5hasex | WT_veg | OK     | 49,256   | 128,509  | 1,3835       | -2,68135     | 0,00733256 | 0,0406475  | yes |
| AN10858 | ChrI_A_nidulans_FGSC_A4:3528628-3529183    | WT_5hasex | WT_veg | OK     | 105,72   | 296,163  | 1,48614      | -3,01212     | 0,0025943  | 0,0173313  | yes |
| AN10860 | ChrI_A_nidulans_FGSC_A4:3375801-3376386    | WT_5hasex | WT_veg | NOTEST | 0,653545 | 1,71636  | 1,39299      | -0,767076    | 0,443036   | 1          | no  |
| AN10861 | ChrI_A_nidulans_FGSC_A4:3590922-3592549    | WT_5hasex | WT_veg | OK     | 2,57637  | 5,95217  | 1,20808      | -1,46249     | 0,143607   | 0,368689   | no  |
| AN10862 | ChrI_A_nidulans_FGSC_A4:3636822-3638500    | WT_5hasex | WT_veg | OK     | 7,3313   | 21,714   | 1,56648      | -2,54533     | 0,0109175  | 0,055798   | no  |
| AN10863 | ChrI_A_nidulans_FGSC_A4:3641603-3643000    | WT_5hasex | WT_veg | OK     | 142,625  | 92,1383  | -0,630359    | 1,28879      | 0,197472   | 0,451058   | no  |
| AN10864 | ChrI_A_nidulans_FGSC_A4:3639064-3640017    | WT_5hasex | WT_veg | OK     | 32,536   | 131,475  | 2,01468      | -3,76105     | 0,0001692  | 0,00172703 | yes |
| AN10865 | ChrI_A_nidulans_FGSC_A4:3640314-3641042    | WT_5hasex | WT_veg | OK     | 26,9694  | 100,839  | 1,90265      | -3,16498     | 0,00155095 | 0,0113005  | yes |
| AN10866 | ChrI_A_nidulans_FGSC_A4:3592945-3594392    | WT_5hasex | WT_veg | OK     | 23,0813  | 73,107   | 1,66329      | -3,20415     | 0,00135461 | 0,0100995  | yes |
| AN10868 | ChrI_A_nidulans_FGSC_A4:3597828-3599560    | WT_5hasex | WT_veg | NOTEST | 0        | 0,537998 | 1.79769e+308 | 1.79769e+308 | 0,123323   | 1          | no  |
| AN10869 | ChrI_A_nidulans_FGSC_A4:3711212-3713408    | WT_5hasex | WT_veg | OK     | 2,27527  | 5,34428  | 1,23196      | -1,44193     | 0,149321   | 0,377842   | no  |
| AN10870 | ChrI_A_nidulans_FGSC_A4:3708970-3711179    | WT_5hasex | WT_veg | NOTEST | 0,666827 | 2,13864  | 1,68131      | -1,5292      | 0,126216   | 1          | no  |
| AN10871 | ChrIV_A_nidulans_FGSC_A4:1406120-1406665   | WT_5hasex | WT_veg | OK     | 70,8189  | 159,341  | 1,16991      | -2,2226      | 0,0262426  | 0,109523   | no  |
| AN10872 | ChrIV_A_nidulans_FGSC_A4:1386458-1388702   | WT_5hasex | WT_veg | OK     | 53,7035  | 91,6199  | 0,770646     | -1,60508     | 0,108477   | 0,306536   | no  |
| AN10873 | ChrIV_A_nidulans_FGSC_A4:1380025-1381832   | WT_5hasex | WT_veg | OK     | 146,02   | 200,245  | 0,4556       | -0,907578    | 0,364101   | 0,638948   | no  |
| AN10874 | ChrIV_A_nidulans_FGSC_A4:1378519-1379881   | WT_5hasex | WT_veg | OK     | 86,7799  | 178,981  | 1,04437      | -2,16964     | 0,0300342  | 0,121486   | no  |
| AN10875 | ChrIV_A_nidulans_FGSC_A4:1375400-1376590   | WT_5hasex | WT_veg | OK     | 31,5079  | 26,822   | -0,232293    | 0,426606     | 0,669666   | 0,852295   | no  |
| AN10876 | ChrIV_A_nidulans_FGSC_A4:1235624-1237229   | WT_5hasex | WT_veg | NOTEST | 0,936023 | 0,575485 | -0,701767    | 0,456571     | 0,64798    | 1          | no  |
| AN10877 | ChrIV_A_nidulans_FGSC_A4:1388936-1391286   | WT_5hasex | WT_veg | OK     | 46,0841  | 184,568  | 2,00181      | -4,16596     | 3,1005E-05 | 0,00039464 | yes |
| AN10878 | ChrIV_A_nidulans_FGSC_A4:1381940-1383142   | WT_5hasex | WT_veg | OK     | 58,7082  | 76,1111  | 0,374546     | -0,761296    | 0,44648    | 0,709568   | no  |
| AN10879 | ChrIV_A_nidulans_FGSC_A4:1377284-1378354   | WT_5hasex | WT_veg | OK     | 39,8596  | 92,1632  | 1,20926      | -2,3618      | 0,0181864  | 0,0827641  | no  |
| AN1088  | ChrVIII_A_nidulans_FGSC_A4:1556048-1559472 | WT_5hasex | WT_veg | OK     | 65,727   | 372,654  | 2,50328      | -5,13733     | 2,7867E-07 | 5,8646E-06 | yes |
| AN10880 | ChrIV_A_nidulans_FGSC_A4:1238224-1239151   | WT_5hasex | WT_veg | OK     | 154,927  | 496,485  | 1,68016      | -3,33717     | 0,00084637 | 0,00681908 | yes |
| AN10882 | ChrIV_A_nidulans_FGSC_A4:1372978-1375135   | WT_5hasex | WT_veg | OK     | 24,8919  | 46,3112  | 0,895686     | -1,79641     | 0,0724293  | 0,230965   | no  |
| AN10883 | ChrIV_A_nidulans_FGSC_A4:1146497-1147612   | WT_5hasex | WT_veg | NOTEST | 0        | 0        | 0            | 0            | 1          | 1          | no  |
| AN10884 | ChrIV_A_nidulans_FGSC_A4:1131716-1134001   | WT_5hasex | WT_veg | NOTEST | 1,95904  | 1,23995  | -0,659868    | 0,723556     | 0,469339   | 1          | no  |

## Supplementary table 1

|         |                                            |           |        |        |           |          |               |               |            |            |     |
|---------|--------------------------------------------|-----------|--------|--------|-----------|----------|---------------|---------------|------------|------------|-----|
| AN10885 | ChrIV_A_nidulans_FGSC_A4:1098587-1100204   | WT_5hasex | WT_veg | OK     | 5,56074   | 9,10431  | 0,711272      | -1,08879      | 0,276246   | 0,549306   | no  |
| AN10886 | ChrIV_A_nidulans_FGSC_A4:1091125-1092711   | WT_5hasex | WT_veg | OK     | 10,1812   | 5,8901   | -0,789542     | 1,14926       | 0,250448   | 0,51892    | no  |
| AN10888 | ChrIV_A_nidulans_FGSC_A4:1143995-1145836   | WT_5hasex | WT_veg | NOTEST | 0         | 0        | 0             | 0             | 1          | 1          | no  |
| AN10889 | ChrIV_A_nidulans_FGSC_A4:1134036-1135110   | WT_5hasex | WT_veg | OK     | 2,92439   | 0,819211 | -1,83583      | 1,29325       | 0,195924   | 0,448684   | no  |
| AN1089  | ChrVIII_A_nidulans_FGSC_A4:1556048-1559472 | WT_5hasex | WT_veg | OK     | 134,198   | 477,725  | 1,83182       | -3,59469      | 0,00032477 | 0,00301217 | yes |
| AN10890 | ChrIV_A_nidulans_FGSC_A4:1100253-1100746   | WT_5hasex | WT_veg | OK     | 4,91644   | 12,5465  | 1,3516        | -1,60597      | 0,10828    | 0,306194   | no  |
| AN10891 | ChrIV_A_nidulans_FGSC_A4:1031995-1033820   | WT_5hasex | WT_veg | NOTEST | 0,355941  | 0,63187  | 0,827992      | -0,604002     | 0,545842   | 1          | no  |
| AN10892 | ChrIV_A_nidulans_FGSC_A4:1019565-1020860   | WT_5hasex | WT_veg | OK     | 15,1374   | 34,4501  | 1,18639       | -2,08431      | 0,0371324  | 0,142759   | no  |
| AN10893 | ChrIV_A_nidulans_FGSC_A4:979030-981652     | WT_5hasex | WT_veg | OK     | 7,14776   | 2,53482  | -1,49561      | 2,31506       | 0,0206095  | 0,0912375  | no  |
| AN10894 | ChrIV_A_nidulans_FGSC_A4:924333-925478     | WT_5hasex | WT_veg | NOTEST | 0         | 0        | 0             | 0             | 1          | 1          | no  |
| AN10895 | ChrIV_A_nidulans_FGSC_A4:977258-978718     | WT_5hasex | WT_veg | NOTEST | 0,584467  | 1,87088  | 1,67853       | -1,54424      | 0,122529   | 1          | no  |
| AN10896 | ChrIV_A_nidulans_FGSC_A4:1021100-1021863   | WT_5hasex | WT_veg | NOTEST | 1,95858   | 3,2994   | 0,752398      | -0,688452     | 0,491168   | 1          | no  |
| AN10897 | ChrIV_A_nidulans_FGSC_A4:1034246-1036299   | WT_5hasex | WT_veg | NOTEST | 0,0935853 | 0        | -1.79769e+308 | -1.79769e+308 | 0,165569   | 1          | no  |
| AN10898 | ChrIV_A_nidulans_FGSC_A4:1037114-1038996   | WT_5hasex | WT_veg | NOTEST | 0,784335  | 1,16311  | 0,568443      | -0,454505     | 0,649465   | 1          | no  |
| AN10899 | ChrIV_A_nidulans_FGSC_A4:925583-926464     | WT_5hasex | WT_veg | NOTEST | 0         | 0        | 0             | 0             | 1          | 1          | no  |
| AN1090  | ChrVIII_A_nidulans_FGSC_A4:1552441-1553774 | WT_5hasex | WT_veg | OK     | 23,3895   | 73,4337  | 1,65058       | -3,09268      | 0,00198361 | 0,0138816  | yes |
| AN10900 | ChrIV_A_nidulans_FGSC_A4:892691-894517     | WT_5hasex | WT_veg | OK     | 2,62136   | 5,04688  | 0,945076      | -1,24273      | 0,213966   | 0,473331   | no  |
| AN10901 | ChrIV_A_nidulans_FGSC_A4:882622-886039     | WT_5hasex | WT_veg | OK     | 22,891    | 99,1996  | 2,11555       | -4,05261      | 5,0649E-05 | 0,00060527 | yes |
| AN10902 | ChrIV_A_nidulans_FGSC_A4:798204-799345     | WT_5hasex | WT_veg | OK     | 21,5165   | 26,3695  | 0,293426      | -0,519003     | 0,603759   | 0,815564   | no  |
| AN10903 | ChrIV_A_nidulans_FGSC_A4:886484-888338     | WT_5hasex | WT_veg | OK     | 44,6979   | 484,947  | 3,43955       | -6,11078      | 9,9146E-10 | 3,5152E-08 | yes |
| AN10905 | ChrIV_A_nidulans_FGSC_A4:799794-802039     | WT_5hasex | WT_veg | OK     | 51,2996   | 54,2149  | 0,0797426     | -0,16122      | 0,87192    | 0,950833   | no  |
| AN10906 | ChrIV_A_nidulans_FGSC_A4:674176-676326     | WT_5hasex | WT_veg | OK     | 47,0787   | 25,2527  | -0,898633     | 1,62383       | 0,104412   | 0,298445   | no  |
| AN10907 | ChrIV_A_nidulans_FGSC_A4:670519-671113     | WT_5hasex | WT_veg | OK     | 2,46621   | 3,84056  | 0,639022      | -0,554606     | 0,579164   | 0,800616   | no  |
| AN10908 | ChrIV_A_nidulans_FGSC_A4:656630-658704     | WT_5hasex | WT_veg | OK     | 5,36644   | 2,84981  | -0,9131       | 1,22755       | 0,219617   | 0,480878   | no  |
| AN10909 | ChrIV_A_nidulans_FGSC_A4:623262-624328     | WT_5hasex | WT_veg | OK     | 8,76365   | 13,6232  | 0,636464      | -0,950715     | 0,341749   | 0,61738    | no  |
| AN10910 | ChrIV_A_nidulans_FGSC_A4:616237-619313     | WT_5hasex | WT_veg | OK     | 75,7343   | 25,7453  | -1,55664      | 3,14815       | 0,00164305 | 0,0118561  | yes |
| AN10911 | ChrIV_A_nidulans_FGSC_A4:676611-678269     | WT_5hasex | WT_veg | OK     | 13,5361   | 17,67    | 0,384489      | -0,660802     | 0,50874    | 0,755394   | no  |
| AN10912 | ChrIV_A_nidulans_FGSC_A4:671707-673113     | WT_5hasex | WT_veg | OK     | 5,26442   | 8,42842  | 0,678987      | -0,978821     | 0,327668   | 0,60402    | no  |
| AN10913 | ChrIV_A_nidulans_FGSC_A4:654932-656332     | WT_5hasex | WT_veg | OK     | 28,8705   | 17,5983  | -0,714158     | 1,31391       | 0,188878   | 0,438984   | no  |
| AN10914 | ChrIV_A_nidulans_FGSC_A4:652970-654698     | WT_5hasex | WT_veg | OK     | 16,5545   | 8,37313  | -0,983387     | 1,66008       | 0,0968978  | 0,282908   | no  |
| AN10915 | ChrIV_A_nidulans_FGSC_A4:621809-622987     | WT_5hasex | WT_veg | OK     | 31,1908   | 33,6495  | 0,109463      | -0,209464     | 0,834086   | 0,93403    | no  |
| AN10916 | ChrIV_A_nidulans_FGSC_A4:614767-615775     | WT_5hasex | WT_veg | OK     | 2,52525   | 1,83802  | -0,458276     | 0,383577      | 0,701292   | 0,870132   | no  |
| AN10917 | ChrIV_A_nidulans_FGSC_A4:540957-544506     | WT_5hasex | WT_veg | OK     | 9,91685   | 11,0049  | 0,150198      | -0,288882     | 0,772672   | 0,90678    | no  |
| AN10918 | ChrIV_A_nidulans_FGSC_A4:538013-540643     | WT_5hasex | WT_veg | OK     | 46,5198   | 96,9573  | 1,0595        | -2,13429      | 0,0328193  | 0,130009   | no  |
| AN10919 | ChrIV_A_nidulans_FGSC_A4:461576-462782     | WT_5hasex | WT_veg | NOTEST | 0         | 0        | 0             | 0             | 1          | 1          | no  |
| AN1092  | ChrVIII_A_nidulans_FGSC_A4:1546066-1547665 | WT_5hasex | WT_veg | OK     | 29,0728   | 117,248  | 2,01182       | -3,98377      | 6,7832E-05 | 0,00078225 | yes |
| AN10920 | ChrIV_A_nidulans_FGSC_A4:449225-450991     | WT_5hasex | WT_veg | NOTEST | 1,74655   | 1,76149  | 0,0122899     | -0,0137006    | 0,989069   | 1          | no  |
| AN10921 | ChrIV_A_nidulans_FGSC_A4:443757-448621     | WT_5hasex | WT_veg | OK     | 28,2241   | 7,06379  | -1,99841      | 4,10096       | 4,1143E-05 | 0,00050546 | yes |
| AN10922 | ChrIV_A_nidulans_FGSC_A4:417567-418912     | WT_5hasex | WT_veg | OK     | 79,8696   | 178,072  | 1,15674       | -2,35502      | 0,0185215  | 0,0839662  | no  |
| AN10923 | ChrIV_A_nidulans_FGSC_A4:351795-353879     | WT_5hasex | WT_veg | OK     | 41,2594   | 84,7091  | 1,03779       | -2,11119      | 0,0347557  | 0,135956   | no  |
| AN10924 | ChrIV_A_nidulans_FGSC_A4:337166-339047     | WT_5hasex | WT_veg | OK     | 27,4907   | 28,7614  | 0,0651887     | -0,131395     | 0,895463   | 0,959985   | no  |
| AN10925 | ChrIV_A_nidulans_FGSC_A4:349868-351427     | WT_5hasex | WT_veg | OK     | 10,9629   | 6,8298   | -0,682714     | 1,108         | 0,267861   | 0,539738   | no  |
| AN10927 | ChrIV_A_nidulans_FGSC_A4:335065-336958     | WT_5hasex | WT_veg | OK     | 3,03807   | 6,53324  | 1,10464       | -1,57396      | 0,115496   | 0,319194   | no  |
| AN10928 | ChrIV_A_nidulans_FGSC_A4:415936-417282     | WT_5hasex | WT_veg | OK     | 4,09659   | 5,74045  | 0,486741      | -0,581775     | 0,560718   | 0,789459   | no  |
| AN10929 | ChrIV_A_nidulans_FGSC_A4:264667-266548     | WT_5hasex | WT_veg | OK     | 51,0448   | 111,098  | 1,122         | -2,33415      | 0,0195879  | 0,0877005  | no  |
| AN1093  | ChrVIII_A_nidulans_FGSC_A4:1542736-1545610 | WT_5hasex | WT_veg | OK     | 61,4956   | 121,007  | 0,976537      | -2,0208       | 0,0433009  | 0,159939   | no  |
| AN10930 | ChrIV_A_nidulans_FGSC_A4:200562-202216     | WT_5hasex | WT_veg | OK     | 1,67744   | 8,62591  | 2,36241       | -3,14638      | 0,00165302 | 0,01191    | yes |
| AN10931 | ChrIV_A_nidulans_FGSC_A4:162503-164512     | WT_5hasex | WT_veg | NOTEST | 0,125538  | 0        | -1.79769e+308 | -1.79769e+308 | 0,224063   | 1          | no  |
| AN10932 | ChrIV_A_nidulans_FGSC_A4:148830-150283     | WT_5hasex | WT_veg | OK     | 23,9841   | 32,0342  | 0,417536      | -0,654801     | 0,512596   | 0,757798   | no  |
| AN10933 | ChrIV_A_nidulans_FGSC_A4:128663-130243     | WT_5hasex | WT_veg | NOTEST | 0         | 0        | 0             | 0             | 1          | 1          | no  |
| AN10934 | ChrIV_A_nidulans_FGSC_A4:262665-264265     | WT_5hasex | WT_veg | OK     | 28,6011   | 33,7424  | 0,238493      | -0,473114     | 0,636132   | 0,833704   | no  |
| AN10935 | ChrIV_A_nidulans_FGSC_A4:150477-152919     | WT_5hasex | WT_veg | OK     | 7,99476   | 4,55729  | -0,81088      | 1,25336       | 0,210074   | 0,468173   | no  |
| AN10936 | ChrIV_A_nidulans_FGSC_A4:202510-204288     | WT_5hasex | WT_veg | OK     | 8,94579   | 38,6573  | 2,11146       | -3,60086      | 0,00031717 | 0,00295503 | yes |



## Supplementary table 1

|         |                                            |           |        |        |          |          |            |           |            |            |     |
|---------|--------------------------------------------|-----------|--------|--------|----------|----------|------------|-----------|------------|------------|-----|
| AN10937 | ChrIV_A_nidulans_FGSC_A4:160793-162277     | WT_5hasex | WT_veg | OK     | 30,6853  | 24,9046  | -0,301132  | 0,479199  | 0,631797   | 0,831394   | no  |
| AN10938 | ChrIV_A_nidulans_FGSC_A4:159383-160422     | WT_5hasex | WT_veg | OK     | 2,06662  | 4,00384  | 0,954108   | -1,03567  | 0,300355   | 0,576007   | no  |
| AN10939 | ChrIV_A_nidulans_FGSC_A4:130993-131906     | WT_5hasex | WT_veg | NOTEST | 0        | 0        | 0          | 0         | 1          | 1          | no  |
| AN10940 | ChrIV_A_nidulans_FGSC_A4:1514375-1518102   | WT_5hasex | WT_veg | OK     | 26,2569  | 78,3263  | 1,5768     | -2,91926  | 0,00350867 | 0,0223099  | yes |
| AN10941 | ChrIV_A_nidulans_FGSC_A4:1561774-1565166   | WT_5hasex | WT_veg | OK     | 85,8204  | 161,655  | 0,913525   | -1,85203  | 0,0640209  | 0,211541   | no  |
| AN10942 | ChrIV_A_nidulans_FGSC_A4:1574916-1576946   | WT_5hasex | WT_veg | OK     | 89,095   | 130,347  | 0,548945   | -1,13056  | 0,258241   | 0,528154   | no  |
| AN10943 | ChrIV_A_nidulans_FGSC_A4:1712410-1713918   | WT_5hasex | WT_veg | OK     | 20,8717  | 124,111  | 2,572      | -4,75193  | 2,0148E-06 | 3,4616E-05 | yes |
| AN10944 | ChrIV_A_nidulans_FGSC_A4:1714079-1716760   | WT_5hasex | WT_veg | OK     | 31,5198  | 62,4258  | 0,985884   | -2,04198  | 0,0411533  | 0,153938   | no  |
| AN10945 | ChrIV_A_nidulans_FGSC_A4:1786260-1787271   | WT_5hasex | WT_veg | OK     | 191,497  | 393,151  | 1,03777    | -1,99451  | 0,0460959  | 0,167593   | no  |
| AN10946 | ChrIV_A_nidulans_FGSC_A4:1792005-1794595   | WT_5hasex | WT_veg | OK     | 47,3986  | 92,6695  | 0,967252   | -2,01424  | 0,0439848  | 0,161724   | no  |
| AN10947 | ChrIV_A_nidulans_FGSC_A4:1838964-1840038   | WT_5hasex | WT_veg | OK     | 25,1363  | 45,326   | 0,850564   | -1,58182  | 0,11369    | 0,316053   | no  |
| AN10948 | ChrIV_A_nidulans_FGSC_A4:1998111-1999689   | WT_5hasex | WT_veg | OK     | 2,11403  | 5,42006  | 1,35831    | -1,62652  | 0,103839   | 0,297439   | no  |
| AN10949 | ChrIV_A_nidulans_FGSC_A4:2027691-2032634   | WT_5hasex | WT_veg | OK     | 7,45148  | 19,828   | 1,41194    | -2,46712  | 0,0136203  | 0,0663813  | no  |
| AN1095  | ChrVIII_A_nidulans_FGSC_A4:1535731-1536846 | WT_5hasex | WT_veg | OK     | 58,4065  | 160,041  | 1,45424    | -2,96265  | 0,00305004 | 0,01982    | yes |
| AN10951 | ChrIV_A_nidulans_FGSC_A4:2075140-2076950   | WT_5hasex | WT_veg | NOTEST | 0,903458 | 2,81958  | 1,64195    | -1,77748  | 0,0754889  | 1          | no  |
| AN10952 | ChrIV_A_nidulans_FGSC_A4:2117669-2119696   | WT_5hasex | WT_veg | OK     | 7,14124  | 8,62972  | 0,273139   | -0,447661 | 0,654398   | 0,844089   | no  |
| AN10953 | ChrIV_A_nidulans_FGSC_A4:1569557-1571010   | WT_5hasex | WT_veg | OK     | 25,7199  | 50,5568  | 0,975018   | -1,82959  | 0,0673117  | 0,219317   | no  |
| AN10954 | ChrIV_A_nidulans_FGSC_A4:1571321-1574268   | WT_5hasex | WT_veg | OK     | 25,516   | 43,8973  | 0,782732   | -1,56747  | 0,117004   | 0,322053   | no  |
| AN10955 | ChrIV_A_nidulans_FGSC_A4:1711086-1712137   | WT_5hasex | WT_veg | OK     | 33,6513  | 79,1938  | 1,23473    | -2,34323  | 0,0191178  | 0,0859924  | no  |
| AN10956 | ChrIV_A_nidulans_FGSC_A4:1716996-1718978   | WT_5hasex | WT_veg | OK     | 38,0659  | 134,135  | 1,81711    | -3,7361   | 0,0001869  | 0,0018798  | yes |
| AN10957 | ChrIV_A_nidulans_FGSC_A4:1783309-1785703   | WT_5hasex | WT_veg | OK     | 2,23686  | 3,73851  | 0,740989   | -1,03421  | 0,30104    | 0,576753   | no  |
| AN10958 | ChrIV_A_nidulans_FGSC_A4:1781304-1783159   | WT_5hasex | WT_veg | OK     | 3,10571  | 6,68309  | 1,10559    | -1,5368   | 0,124342   | 0,335191   | no  |
| AN10959 | ChrIV_A_nidulans_FGSC_A4:1794854-1797121   | WT_5hasex | WT_veg | OK     | 4,14125  | 8,52325  | 1,04134    | -1,50027  | 0,133544   | 0,351709   | no  |
| AN1096  | ChrVIII_A_nidulans_FGSC_A4:1532995-1534971 | WT_5hasex | WT_veg | OK     | 49,7446  | 144,718  | 1,54063    | -3,25205  | 0,00114576 | 0,00878162 | yes |
| AN10960 | ChrIV_A_nidulans_FGSC_A4:1840460-1841772   | WT_5hasex | WT_veg | OK     | 10,1079  | 56,21    | 2,47535    | -4,07815  | 4,5395E-05 | 0,00055062 | yes |
| AN10961 | ChrIV_A_nidulans_FGSC_A4:1995604-1997794   | WT_5hasex | WT_veg | NOTEST | 1,49279  | 3,37196  | 1,17558    | -1,45644  | 0,145272   | 1          | no  |
| AN10962 | ChrIV_A_nidulans_FGSC_A4:2060194-2062794   | WT_5hasex | WT_veg | OK     | 7,41844  | 20,8786  | 1,49284    | -2,65621  | 0,00790248 | 0,043145   | yes |
| AN10963 | ChrIV_A_nidulans_FGSC_A4:2059059-2059709   | WT_5hasex | WT_veg | OK     | 218,61   | 206,564  | -0,0817684 | 0,167384  | 0,867068   | 0,949097   | no  |
| AN10964 | ChrIV_A_nidulans_FGSC_A4:2055592-2058784   | WT_5hasex | WT_veg | OK     | 111,565  | 202,345  | 0,858925   | -1,47896  | 0,13915    | 0,361139   | no  |
| AN10965 | ChrIV_A_nidulans_FGSC_A4:2119988-2120846   | WT_5hasex | WT_veg | OK     | 163,592  | 581,917  | 1,83071    | -3,79784  | 0,00014596 | 0,00151939 | yes |
| AN10966 | ChrIV_A_nidulans_FGSC_A4:2121126-2122148   | WT_5hasex | WT_veg | OK     | 136,934  | 233,927  | 0,772582   | -1,60009  | 0,109578   | 0,308526   | no  |
| AN10967 | ChrIV_A_nidulans_FGSC_A4:1527770-1528331   | WT_5hasex | WT_veg | OK     | 42,1779  | 117,055  | 1,47263    | -2,61872  | 0,00882594 | 0,0472176  | yes |
| AN10968 | ChrIV_A_nidulans_FGSC_A4:1774893-1775429   | WT_5hasex | WT_veg | OK     | 4,95985  | 6,12458  | 0,304316   | -0,339952 | 0,733893   | 0,887712   | no  |
| AN10969 | ChrIV_A_nidulans_FGSC_A4:2069779-2073580   | WT_5hasex | WT_veg | NOTEST | 1,85613  | 3,59125  | 0,952186   | -0,914099 | 0,360665   | 1          | no  |
| AN1097  | ChrVIII_A_nidulans_FGSC_A4:1521093-1523303 | WT_5hasex | WT_veg | OK     | 129,774  | 590,473  | 2,18587    | -4,28095  | 1,8609E-05 | 0,00025089 | yes |
| AN10970 | ChrIV_A_nidulans_FGSC_A4:1727532-1729235   | WT_5hasex | WT_veg | OK     | 40,0034  | 205,189  | 2,35876    | -4,39804  | 1,0923E-05 | 0,00015537 | yes |
| AN10971 | ChrIV_A_nidulans_FGSC_A4:1512623-1514330   | WT_5hasex | WT_veg | OK     | 12,8115  | 25,4963  | 0,992845   | -1,74906  | 0,0802813  | 0,248283   | no  |
| AN10972 | ChrIV_A_nidulans_FGSC_A4:2024739-2026533   | WT_5hasex | WT_veg | OK     | 3,5875   | 3,00993  | -0,253248  | 0,292279  | 0,770073   | 0,905596   | no  |
| AN10973 | ChrIV_A_nidulans_FGSC_A4:2077341-2078795   | WT_5hasex | WT_veg | OK     | 7,15209  | 5,41722  | -0,400812  | 0,56008   | 0,575425   | 0,798555   | no  |
| AN10974 | ChrIV_A_nidulans_FGSC_A4:2162241-2163364   | WT_5hasex | WT_veg | OK     | 100,638  | 145,896  | 0,53576    | -1,05365  | 0,292044   | 0,566803   | no  |
| AN10975 | ChrIV_A_nidulans_FGSC_A4:2170510-2171497   | WT_5hasex | WT_veg | OK     | 96,0088  | 290,014  | 1,59488    | -3,30587  | 0,00094681 | 0,00751054 | yes |
| AN10976 | ChrIV_A_nidulans_FGSC_A4:2186818-2189114   | WT_5hasex | WT_veg | NOTEST | 0,459761 | 0,643265 | 0,484531   | -0,419386 | 0,674934   | 1          | no  |
| AN10977 | ChrIV_A_nidulans_FGSC_A4:2248244-2248711   | WT_5hasex | WT_veg | OK     | 910,319  | 3317,91  | 1,86583    | -3,31344  | 0,00092156 | 0,00733693 | yes |
| AN10978 | ChrIV_A_nidulans_FGSC_A4:2272462-2274122   | WT_5hasex | WT_veg | OK     | 6,32484  | 13,4952  | 1,09334    | -1,73573  | 0,082612   | 0,253516   | no  |
| AN10979 | ChrIV_A_nidulans_FGSC_A4:2279257-2281367   | WT_5hasex | WT_veg | OK     | 10,4668  | 12,0329  | 0,201164   | -0,350641 | 0,725857   | 0,883545   | no  |
| AN1098  | ChrVIII_A_nidulans_FGSC_A4:1520749-1521054 | WT_5hasex | WT_veg | OK     | 4,98517  | 13,4531  | 1,43222    | -1,3922   | 0,163861   | 0,401002   | no  |
| AN10980 | ChrIV_A_nidulans_FGSC_A4:2292909-2294059   | WT_5hasex | WT_veg | OK     | 21,7485  | 29,0692  | 0,418571   | -0,744133 | 0,456796   | 0,71774    | no  |
| AN10981 | ChrIV_A_nidulans_FGSC_A4:2298137-2299784   | WT_5hasex | WT_veg | OK     | 642,329  | 785,825  | 0,290896   | -0,379633 | 0,704218   | 0,871883   | no  |
| AN10983 | ChrIV_A_nidulans_FGSC_A4:2384602-2385391   | WT_5hasex | WT_veg | OK     | 88,0745  | 100,628  | 0,192233   | -0,389578 | 0,696849   | 0,867458   | no  |
| AN10984 | ChrIV_A_nidulans_FGSC_A4:2397044-2398895   | WT_5hasex | WT_veg | NOTEST | 0        | 0        | 0          | 0         | 1          | 1          | no  |
| AN10985 | ChrIV_A_nidulans_FGSC_A4:2400594-2401337   | WT_5hasex | WT_veg | OK     | 5,14488  | 11,8811  | 1,20746    | -1,44472  | 0,148537   | 0,376465   | no  |
| AN10986 | ChrIV_A_nidulans_FGSC_A4:2429712-2431518   | WT_5hasex | WT_veg | OK     | 2,24534  | 12,3014  | 2,45382    | -2,80459  | 0,00503804 | 0,0299188  | yes |
| AN10987 | ChrIV_A_nidulans_FGSC_A4:2172143-2172797   | WT_5hasex | WT_veg | OK     | 38,7793  | 81,265   | 1,06735    | -1,95312  | 0,0508053  | 0,179642   | no  |

## Supplementary table 1

|         |                                            |           |        |        |          |          |             |            |            |            |     |
|---------|--------------------------------------------|-----------|--------|--------|----------|----------|-------------|------------|------------|------------|-----|
| AN10988 | ChrIV_A_nidulans_FGSC_A4:2246280-2247901   | WT_5hasex | WT_veg | OK     | 14,0924  | 40,6674  | 1,52895     | -2,57613   | 0,00999129 | 0,0520907  | no  |
| AN10989 | ChrIV_A_nidulans_FGSC_A4:2270688-2272293   | WT_5hasex | WT_veg | NOTEST | 1,69328  | 1,50764  | -0,167537   | 0,178883   | 0,85803    | 1          | no  |
| AN10990 | ChrIV_A_nidulans_FGSC_A4:2300111-2301104   | WT_5hasex | WT_veg | OK     | 35,696   | 98,8329  | -2,46923    | -2,80808   | 0,00498376 | 0,0296603  | yes |
| AN10991 | ChrIV_A_nidulans_FGSC_A4:2383205-2384092   | WT_5hasex | WT_veg | OK     | 61,0969  | 266,151  | 2,12307     | -4,27172   | 1,9397E-05 | 0,0002595  | yes |
| AN10992 | ChrIV_A_nidulans_FGSC_A4:2399816-2400432   | WT_5hasex | WT_veg | OK     | 6,92341  | 20,5827  | 1,57188     | -1,91857   | 0,0550384  | 0,189882   | no  |
| AN10993 | ChrIV_A_nidulans_FGSC_A4:2309859-2311018   | WT_5hasex | WT_veg | OK     | 7,71216  | 5,01773  | -0,620101   | 0,811656   | 0,416989   | 0,685997   | no  |
| AN10994 | ChrIV_A_nidulans_FGSC_A4:2274250-2274930   | WT_5hasex | WT_veg | OK     | 42,9869  | 90,2143  | 1,06946     | -1,96294   | 0,0496537  | 0,176731   | no  |
| AN10995 | ChrIV_A_nidulans_FGSC_A4:2329045-2329573   | WT_5hasex | WT_veg | OK     | 17,95    | 15,7709  | -0,186719   | 0,263487   | 0,792175   | 0,915648   | no  |
| AN10996 | ChrIV_A_nidulans_FGSC_A4:2163389-2165093   | WT_5hasex | WT_veg | OK     | 106,621  | 220,089  | 1,0456      | -2,02305   | 0,0430683  | 0,159237   | no  |
| AN10997 | ChrIV_A_nidulans_FGSC_A4:2189164-2189808   | WT_5hasex | WT_veg | NOTEST | 0        | 0        | 0           | 0          | 1          | 1          | no  |
| AN10998 | ChrIV_A_nidulans_FGSC_A4:2278285-2278921   | WT_5hasex | WT_veg | OK     | 14,9522  | 17,2361  | 0,205077    | -0,309232  | 0,757145   | 0,899696   | no  |
| AN10999 | ChrIV_A_nidulans_FGSC_A4:2291161-2292796   | WT_5hasex | WT_veg | OK     | 28,135   | 37,75    | 0,424114    | -0,840767  | 0,400478   | 0,672516   | no  |
| AN1100  | ChrVIII_A_nidulans_FGSC_A4:1507180-1511248 | WT_5hasex | WT_veg | OK     | 15,8701  | 20,8099  | 0,390958    | -0,636987  | 0,524133   | 0,765913   | no  |
| AN11000 | ChrIV_A_nidulans_FGSC_A4:2395775-2397013   | WT_5hasex | WT_veg | NOTEST | 0        | 0        | 0           | 0          | 1          | 1          | no  |
| AN11001 | ChrIV_A_nidulans_FGSC_A4:2431894-2432664   | WT_5hasex | WT_veg | OK     | 160,33   | 1171,05  | 2,86869     | -5,93529   | 2,9333E-09 | 9,4243E-08 | yes |
| AN11002 | ChrIV_A_nidulans_FGSC_A4:2372192-2373313   | WT_5hasex | WT_veg | OK     | 2,66291  | 3,67063  | 0,463026    | -0,54612   | 0,584984   | 0,804267   | no  |
| AN11003 | ChrIV_A_nidulans_FGSC_A4:2368938-2371937   | WT_5hasex | WT_veg | OK     | 8,50233  | 16,1595  | 0,926449    | -1,65788   | 0,0973414  | 0,28384    | no  |
| AN11004 | ChrIV_A_nidulans_FGSC_A4:2469963-2471202   | WT_5hasex | WT_veg | OK     | 139,819  | 197,035  | 0,49489     | -1,02197   | 0,306797   | 0,582859   | no  |
| AN11005 | ChrIV_A_nidulans_FGSC_A4:2516829-2519367   | WT_5hasex | WT_veg | OK     | 67,9355  | 93,0584  | 0,453969    | -0,916003  | 0,359666   | 0,634308   | no  |
| AN11006 | ChrIV_A_nidulans_FGSC_A4:2468497-2469548   | WT_5hasex | WT_veg | OK     | 342,787  | 259,094  | -0,403836   | 0,774507   | 0,438631   | 0,703232   | no  |
| AN11007 | ChrIV_A_nidulans_FGSC_A4:2512520-2516352   | WT_5hasex | WT_veg | OK     | 18,4286  | 19,2707  | 0,0644636   | -0,131938  | 0,895033   | 0,959897   | no  |
| AN11008 | ChrIV_A_nidulans_FGSC_A4:2591531-2593040   | WT_5hasex | WT_veg | OK     | 125,585  | 128,999  | 0,0386911   | -0,0773822 | 0,938319   | 0,976754   | no  |
| AN11009 | ChrIV_A_nidulans_FGSC_A4:2634445-2636457   | WT_5hasex | WT_veg | OK     | 4,96094  | 4,43509  | -0,161652   | 0,23021    | 0,817928   | 0,927067   | no  |
| AN1101  | ChrVIII_A_nidulans_FGSC_A4:1504751-1506346 | WT_5hasex | WT_veg | OK     | 69,1449  | 42,5497  | -0,700474   | 1,1035     | 0,269809   | 0,541789   | no  |
| AN11010 | ChrIV_A_nidulans_FGSC_A4:2686126-2689579   | WT_5hasex | WT_veg | OK     | 22,9036  | 23,6228  | 0,0446064   | -0,0918586 | 0,92681    | 0,972346   | no  |
| AN11011 | ChrIV_A_nidulans_FGSC_A4:2702834-2704678   | WT_5hasex | WT_veg | OK     | 10,861   | 6,87784  | -0,659127   | 1,07211    | 0,283669   | 0,557466   | no  |
| AN11012 | ChrIV_A_nidulans_FGSC_A4:2734471-2735971   | WT_5hasex | WT_veg | NOTEST | 0        | 0        | 0           | 0          | 1          | 1          | no  |
| AN11015 | ChrIV_A_nidulans_FGSC_A4:2684638-2685232   | WT_5hasex | WT_veg | NOTEST | 1,75727  | 2,81765  | 0,681151    | -0,559617  | 0,575741   | 1          | no  |
| AN11016 | ChrIV_A_nidulans_FGSC_A4:2699188-2702650   | WT_5hasex | WT_veg | OK     | 28,035   | 123,156  | 2,13518     | -4,24299   | 2,2056E-05 | 0,00029061 | yes |
| AN11017 | ChrIV_A_nidulans_FGSC_A4:2752919-2753565   | WT_5hasex | WT_veg | NOTEST | 0        | 0        | 0           | 0          | 1          | 1          | no  |
| AN11018 | ChrIV_A_nidulans_FGSC_A4:2554627-2558147   | WT_5hasex | WT_veg | OK     | 50,4367  | 70,32    | 0,479462    | -0,938301  | 0,34809    | 0,6238     | no  |
| AN11019 | ChrIV_A_nidulans_FGSC_A4:2552583-2553332   | WT_5hasex | WT_veg | OK     | 69,8476  | 117,152  | 0,746105    | -1,48831   | 0,13667    | 0,356948   | no  |
| AN1102  | ChrVIII_A_nidulans_FGSC_A4:1500710-1503170 | WT_5hasex | WT_veg | OK     | 141,608  | 212,775  | 0,587424    | -1,14923   | 0,250463   | 0,51892    | no  |
| AN11021 | ChrIV_A_nidulans_FGSC_A4:2768786-2770321   | WT_5hasex | WT_veg | OK     | 4,13807  | 8,78624  | 1,08629     | -1,23774   | 0,215811   | 0,475722   | no  |
| AN11022 | ChrIV_A_nidulans_FGSC_A4:2593310-2596302   | WT_5hasex | WT_veg | OK     | 26,894   | 78,2586  | 1,54097     | -3,20767   | 0,00133814 | 0,00999447 | yes |
| AN11023 | ChrIV_A_nidulans_FGSC_A4:2632821-2634150   | WT_5hasex | WT_veg | OK     | 29,1719  | 23,5065  | -0,311523   | 0,598967   | 0,549195   | 0,781611   | no  |
| AN11024 | ChrIV_A_nidulans_FGSC_A4:2818169-2818824   | WT_5hasex | WT_veg | NOTEST | 0        | 0        | 0           | 0          | 1          | 1          | no  |
| AN11027 | ChrIV_A_nidulans_FGSC_A4:2860124-2861128   | WT_5hasex | WT_veg | OK     | 1,67463  | 4,96773  | 1,56874     | -1,79002   | 0,0734513  | 0,233131   | no  |
| AN11028 | ChrII_A_nidulans_FGSC_A4:111205-112342     | WT_5hasex | WT_veg | NOTEST | 0,251736 | 1,76718  | 2,81147     | -1,36161   | 0,173322   | 1          | no  |
| AN11029 | ChrII_A_nidulans_FGSC_A4:258086-259865     | WT_5hasex | WT_veg | NOTEST | 0        | 0        | 0           | 0          | 1          | 1          | no  |
| AN1103  | ChrVIII_A_nidulans_FGSC_A4:1495655-1497783 | WT_5hasex | WT_veg | OK     | 6,17766  | 10,7621  | 0,800829    | -1,32496   | 0,185186   | 0,433916   | no  |
| AN11030 | ChrII_A_nidulans_FGSC_A4:260221-261268     | WT_5hasex | WT_veg | NOTEST | 0,943073 | 0,938081 | -0,00765627 | 0,00512822 | 0,995908   | 1          | no  |
| AN11031 | ChrII_A_nidulans_FGSC_A4:113468-115453     | WT_5hasex | WT_veg | NOTEST | 0        | 0        | 0           | 0          | 1          | 1          | no  |
| AN11032 | ChrII_A_nidulans_FGSC_A4:555956-558134     | WT_5hasex | WT_veg | OK     | 24,4157  | 39,0005  | 0,675687    | -1,32615   | 0,184791   | 0,433265   | no  |
| AN11033 | ChrII_A_nidulans_FGSC_A4:596727-598126     | WT_5hasex | WT_veg | OK     | 31,4068  | 32,9168  | 0,0677449   | -0,132653  | 0,894467   | 0,959684   | no  |
| AN11034 | ChrII_A_nidulans_FGSC_A4:694478-696480     | WT_5hasex | WT_veg | NOTEST | 1,78246  | 1,87057  | 0,0696154   | -0,0796121 | 0,936546   | 1          | no  |
| AN11035 | ChrII_A_nidulans_FGSC_A4:735604-737045     | WT_5hasex | WT_veg | NOTEST | 0,559459 | 2,81892  | 2,33304     | -2,17064   | 0,0299584  | 1          | no  |
| AN11036 | ChrII_A_nidulans_FGSC_A4:740553-742510     | WT_5hasex | WT_veg | OK     | 5,61942  | 49,4894  | 3,13863     | -5,04422   | 4,5539E-07 | 9,1011E-06 | yes |
| AN11037 | ChrII_A_nidulans_FGSC_A4:774037-775503     | WT_5hasex | WT_veg | NOTEST | 0        | 0        | 0           | 0          | 1          | 1          | no  |
| AN11038 | ChrII_A_nidulans_FGSC_A4:832332-833598     | WT_5hasex | WT_veg | NOTEST | 1,99632  | 0,795187 | -1,32798    | 0,897377   | 0,369518   | 1          | no  |
| AN11039 | ChrII_A_nidulans_FGSC_A4:603541-604431     | WT_5hasex | WT_veg | OK     | 76,8562  | 331,901  | 2,11052     | -4,36102   | 1,2946E-05 | 0,00018073 | yes |
| AN1104  | ChrVIII_A_nidulans_FGSC_A4:1493639-1495427 | WT_5hasex | WT_veg | OK     | 53,725   | 119,283  | 1,15073     | -2,34354   | 0,0191017  | 0,0859496  | no  |
| AN11040 | ChrII_A_nidulans_FGSC_A4:598384-599227     | WT_5hasex | WT_veg | OK     | 30,6404  | 34,7166  | 0,180189    | -0,330851  | 0,740757   | 0,891277   | no  |

## Supplementary table 1

|         |                                            |           |        |        |          |          |               |               |            |            |     |
|---------|--------------------------------------------|-----------|--------|--------|----------|----------|---------------|---------------|------------|------------|-----|
| AN11041 | ChrII_A_nidulans_FGSC_A4:613243-613943     | WT_5hasex | WT_veg | OK     | 30,6878  | 58,6476  | 0,934408      | -1,55331      | 0,12035    | 0,328262   | no  |
| AN11043 | ChrII_A_nidulans_FGSC_A4:737579-738185     | WT_5hasex | WT_veg | OK     | 20,2518  | 99,3252  | 2,29411       | -3,78998      | 0,00015066 | 0,0015597  | yes |
| AN11044 | ChrII_A_nidulans_FGSC_A4:738532-740177     | WT_5hasex | WT_veg | OK     | 10,8799  | 18,9100  | 0,797512      | -1,39539      | 0,162899   | 0,399486   | no  |
| AN11045 | ChrII_A_nidulans_FGSC_A4:553749-555429     | WT_5hasex | WT_veg | OK     | 47,6493  | 63,9644  | 0,424813      | -0,81543      | 0,414826   | 0,68392    | no  |
| AN11046 | ChrII_A_nidulans_FGSC_A4:693124-693974     | WT_5hasex | WT_veg | OK     | 342,215  | 356,482  | 0,058925      | -0,0877457    | 0,930079   | 0,973533   | no  |
| AN11047 | ChrII_A_nidulans_FGSC_A4:696993-697727     | WT_5hasex | WT_veg | NOTEST | 1,01628  | 2,60333  | 1,35706       | -1,04689      | 0,295151   | 1          | no  |
| AN11048 | ChrII_A_nidulans_FGSC_A4:745756-746443     | WT_5hasex | WT_veg | NOTEST | 1,7178   | 3,42554  | 0,995774      | -0,892324     | 0,372219   | 1          | no  |
| AN11049 | ChrII_A_nidulans_FGSC_A4:775831-777130     | WT_5hasex | WT_veg | NOTEST | 0        | 0        | 0             | 0             | 1          | 1          | no  |
| AN1105  | ChrVIII_A_nidulans_FGSC_A4:1492315-1493323 | WT_5hasex | WT_veg | OK     | 318,649  | 679,544  | 1,0926        | -2,17987      | 0,0292674  | 0,119009   | no  |
| AN11050 | ChrII_A_nidulans_FGSC_A4:831286-832261     | WT_5hasex | WT_veg | NOTEST | 1,06774  | 1,15264  | 0,110385      | -0,0859251    | 0,931526   | 1          | no  |
| AN11051 | ChrII_A_nidulans_FGSC_A4:742801-744573     | WT_5hasex | WT_veg | OK     | 3,00366  | 12,46    | 2,05251       | -2,82077      | 0,00479084 | 0,0287538  | yes |
| AN11052 | ChrII_A_nidulans_FGSC_A4:1056172-1060420   | WT_5hasex | WT_veg | OK     | 28,714   | 42,3213  | 0,559629      | -1,17447      | 0,240205   | 0,505999   | no  |
| AN11053 | ChrII_A_nidulans_FGSC_A4:1054690-1055833   | WT_5hasex | WT_veg | OK     | 7,5227   | 10,3252  | 0,456849      | -0,660773     | 0,508758   | 0,755394   | no  |
| AN11054 | ChrII_A_nidulans_FGSC_A4:1172580-1175617   | WT_5hasex | WT_veg | OK     | 39,1373  | 27,4621  | -0,511101     | 1,01118       | 0,311931   | 0,588302   | no  |
| AN11055 | ChrII_A_nidulans_FGSC_A4:1204291-1205507   | WT_5hasex | WT_veg | OK     | 108,603  | 367,925  | 1,76035       | -3,67631      | 0,00023663 | 0,00230225 | yes |
| AN11056 | ChrII_A_nidulans_FGSC_A4:1213693-1214865   | WT_5hasex | WT_veg | OK     | 16,6313  | 37,3139  | 1,16581       | -2,08261      | 0,0372864  | 0,143215   | no  |
| AN11057 | ChrII_A_nidulans_FGSC_A4:1175785-1176658   | WT_5hasex | WT_veg | OK     | 33,2372  | 79,353   | 1,25548       | -2,20146      | 0,0277036  | 0,114048   | no  |
| AN11058 | ChrII_A_nidulans_FGSC_A4:1177219-1178330   | WT_5hasex | WT_veg | OK     | 25,6076  | 50,0222  | 0,965996      | -1,68483      | 0,0920222  | 0,273164   | no  |
| AN11059 | ChrII_A_nidulans_FGSC_A4:1179277-1181252   | WT_5hasex | WT_veg | NOTEST | 1,05381  | 0,446885 | -1,23764      | 0,844099      | 0,398614   | 1          | no  |
| AN1106  | ChrVIII_A_nidulans_FGSC_A4:1488840-1490706 | WT_5hasex | WT_veg | OK     | 3,22538  | 8,87018  | 1,45949       | -2,13541      | 0,0327278  | 0,129728   | no  |
| AN11060 | ChrII_A_nidulans_FGSC_A4:1202842-1204031   | WT_5hasex | WT_veg | OK     | 48,8234  | 199,128  | 2,02805       | -4,11092      | 3,9409E-05 | 0,00048682 | yes |
| AN11061 | ChrII_A_nidulans_FGSC_A4:1210653-1212961   | WT_5hasex | WT_veg | OK     | 108,126  | 247,727  | 1,19603       | -2,41824      | 0,0155959  | 0,0736405  | no  |
| AN11062 | ChrII_A_nidulans_FGSC_A4:1253881-1254446   | WT_5hasex | WT_veg | OK     | 239,767  | 373,415  | 0,639147      | -1,01074      | 0,312143   | 0,588521   | no  |
| AN11063 | ChrII_A_nidulans_FGSC_A4:1260782-1261822   | WT_5hasex | WT_veg | OK     | 35,2047  | 34,3684  | -0,0346854    | 0,0668415     | 0,946708   | 0,980179   | no  |
| AN11065 | ChrII_A_nidulans_FGSC_A4:1306283-1308786   | WT_5hasex | WT_veg | OK     | 25,6209  | 33,889   | 0,403492      | -0,826012     | 0,408797   | 0,678723   | no  |
| AN11066 | ChrII_A_nidulans_FGSC_A4:1391021-1392351   | WT_5hasex | WT_veg | OK     | 18,7487  | 106,145  | 2,50117       | -4,694        | 2,6791E-06 | 4,4456E-05 | yes |
| AN11068 | ChrII_A_nidulans_FGSC_A4:1255616-1257480   | WT_5hasex | WT_veg | OK     | 3,63028  | 1,56579  | -1,21319      | 1,42205       | 0,155012   | 0,387231   | no  |
| AN11069 | ChrII_A_nidulans_FGSC_A4:1261826-1263739   | WT_5hasex | WT_veg | OK     | 69,4905  | 171,213  | 1,3009        | -2,53739      | 0,0111683  | 0,0568084  | no  |
| AN1107  | ChrVIII_A_nidulans_FGSC_A4:1486830-1488389 | WT_5hasex | WT_veg | NOTEST | 1,4915   | 2,01505  | 0,434052      | -0,386767     | 0,698929   | 1          | no  |
| AN11070 | ChrII_A_nidulans_FGSC_A4:1283453-1285242   | WT_5hasex | WT_veg | OK     | 84,9759  | 119,49   | 0,491766      | -0,975056     | 0,329532   | 0,606036   | no  |
| AN11071 | ChrII_A_nidulans_FGSC_A4:1309038-1310710   | WT_5hasex | WT_veg | OK     | 13,5568  | 30,9921  | 1,19289       | -2,19192      | 0,0283856  | 0,116134   | no  |
| AN11072 | ChrII_A_nidulans_FGSC_A4:1389301-1390728   | WT_5hasex | WT_veg | OK     | 82,1341  | 135,826  | 0,725708      | -1,46556      | 0,142767   | 0,367179   | no  |
| AN11073 | ChrV_A_nidulans_FGSC_A4:151888-153610      | WT_5hasex | WT_veg | NOTEST | 0,170836 | 0        | -1.79769e+308 | -1.79769e+308 | 0,165569   | 1          | no  |
| AN11074 | ChrV_A_nidulans_FGSC_A4:136745-137549      | WT_5hasex | WT_veg | NOTEST | 0        | 1,05264  | 1.79769e+308  | 1.79769e+308  | 0,123323   | 1          | no  |
| AN11075 | ChrV_A_nidulans_FGSC_A4:150147-151669      | WT_5hasex | WT_veg | NOTEST | 0        | 0        | 0             | 0             | 1          | 1          | no  |
| AN11076 | ChrV_A_nidulans_FGSC_A4:200354-201710      | WT_5hasex | WT_veg | OK     | 15,4385  | 54,8652  | 1,82936       | -2,51815      | 0,0117973  | 0,0593342  | no  |
| AN11077 | ChrV_A_nidulans_FGSC_A4:321541-322336      | WT_5hasex | WT_veg | NOTEST | 0,940981 | 1,93986  | 1,04371       | -0,79427      | 0,427038   | 1          | no  |
| AN11078 | ChrV_A_nidulans_FGSC_A4:447661-449539      | WT_5hasex | WT_veg | NOTEST | 0,125108 | 0        | -1.79769e+308 | -1.79769e+308 | 0,23809    | 1          | no  |
| AN11079 | ChrV_A_nidulans_FGSC_A4:488126-489070      | WT_5hasex | WT_veg | OK     | 13,2894  | 7,57898  | -0,810202     | 1,01467       | 0,310264   | 0,586673   | no  |
| AN1108  | ChrVIII_A_nidulans_FGSC_A4:1485553-1486544 | WT_5hasex | WT_veg | NOTEST | 1,15735  | 2,2684   | 0,970854      | -0,830988     | 0,405981   | 1          | no  |
| AN11080 | ChrV_A_nidulans_FGSC_A4:636591-637967      | WT_5hasex | WT_veg | OK     | 8,69101  | 6,98892  | -0,314454     | 0,48241       | 0,629515   | 0,830133   | no  |
| AN11081 | ChrV_A_nidulans_FGSC_A4:489120-490272      | WT_5hasex | WT_veg | OK     | 12,7728  | 28,82    | 1,174         | -1,93446      | 0,0530565  | 0,185018   | no  |
| AN11082 | ChrV_A_nidulans_FGSC_A4:635330-636251      | WT_5hasex | WT_veg | OK     | 7,85135  | 19,3767  | 1,30331       | -1,93873      | 0,0525346  | 0,183662   | no  |
| AN11083 | ChrV_A_nidulans_FGSC_A4:505186-505405      | WT_5hasex | WT_veg | OK     | 42,8924  | 135,857  | 1,66329       | -2,33048      | 0,0197808  | 0,0883753  | no  |
| AN11085 | ChrV_A_nidulans_FGSC_A4:323650-324700      | WT_5hasex | WT_veg | OK     | 21,0814  | 55,367   | 1,39305       | -2,18781      | 0,0286837  | 0,117117   | no  |
| AN11086 | ChrV_A_nidulans_FGSC_A4:449909-450324      | WT_5hasex | WT_veg | OK     | 2,96709  | 0,647227 | -2,19671      | 0,708215      | 0,478812   | 0,734161   | no  |
| AN11087 | ChrV_A_nidulans_FGSC_A4:865333-867059      | WT_5hasex | WT_veg | OK     | 7,69591  | 33,4267  | 2,11884       | -3,40787      | 0,00065472 | 0,00547364 | yes |
| AN11089 | ChrIII_A_nidulans_FGSC_A4:3455894-3457869  | WT_5hasex | WT_veg | NOTEST | 0,105999 | 0        | -1.79769e+308 | -1.79769e+308 | 0,23809    | 1          | no  |
| AN1109  | ChrVIII_A_nidulans_FGSC_A4:1482288-1484048 | WT_5hasex | WT_veg | NOTEST | 1,34017  | 2,98858  | 1,15705       | -1,36416      | 0,172518   | 1          | no  |
| AN11090 | ChrIII_A_nidulans_FGSC_A4:3417489-3418766  | WT_5hasex | WT_veg | OK     | 2,20338  | 1,77396  | -0,312743     | 0,308536      | 0,757674   | 0,899896   | no  |
| AN11091 | ChrIII_A_nidulans_FGSC_A4:3406371-3408037  | WT_5hasex | WT_veg | OK     | 11,349   | 16,8238  | 0,567945      | -0,996981     | 0,318774   | 0,594766   | no  |
| AN11092 | ChrIII_A_nidulans_FGSC_A4:3402619-3403962  | WT_5hasex | WT_veg | OK     | 4,2054   | 1,90055  | -1,14583      | 1,28137       | 0,200065   | 0,454514   | no  |
| AN11093 | ChrIII_A_nidulans_FGSC_A4:3368605-3370651  | WT_5hasex | WT_veg | OK     | 5,761    | 7,52427  | 0,385231      | -0,616925     | 0,537284   | 0,773908   | no  |

## Supplementary table 1

|         |                                            |           |        |        |          |         |               |               |            |            |     |
|---------|--------------------------------------------|-----------|--------|--------|----------|---------|---------------|---------------|------------|------------|-----|
| AN11094 | ChrIII_A_nidulans_FGSC_A4:3253831-3255111  | WT_5hasex | WT_veg | OK     | 93,278   | 44,3974 | -1,07106      | 1,72675       | 0,0842121  | 0,256996   | no  |
| AN11095 | ChrIII_A_nidulans_FGSC_A4:3419084-3420259  | WT_5hasex | WT_veg | OK     | 24,1371  | 12,6025 | -0,937537     | 1,53343       | 0,12517    | 0,336592   | no  |
| AN11096 | ChrIII_A_nidulans_FGSC_A4:3252816-3253562  | WT_5hasex | WT_veg | NOTEST | 0        | 1,37796 | 1.79769e+308  | 1.79769e+308  | 0,123323   | 1          | no  |
| AN11097 | ChrIII_A_nidulans_FGSC_A4:3458010-3459027  | WT_5hasex | WT_veg | NOTEST | 0        | 0       | 0             | 0             | 1          | 1          | no  |
| AN11098 | ChrIII_A_nidulans_FGSC_A4:3408079-3410831  | WT_5hasex | WT_veg | OK     | 6,19147  | 8,88735 | 0,521471      | -0,875713     | 0,381186   | 0,655496   | no  |
| AN11099 | ChrIII_A_nidulans_FGSC_A4:3399995-3402285  | WT_5hasex | WT_veg | OK     | 12,814   | 8,42388 | -0,605166     | 1,05096       | 0,293279   | 0,568132   | no  |
| AN11100 | ChrVIII_A_nidulans_FGSC_A4:1478303-1479987 | WT_5hasex | WT_veg | OK     | 10,6104  | 15,1721 | 0,515936      | -0,834819     | 0,403819   | 0,674969   | no  |
| AN11100 | ChrIII_A_nidulans_FGSC_A4:3366066-3368569  | WT_5hasex | WT_veg | NOTEST | 0,511749 | 0       | -1.79769e+308 | -1.79769e+308 | 0,0600506  | 1          | no  |
| AN11101 | ChrIII_A_nidulans_FGSC_A4:3104055-3108045  | WT_5hasex | WT_veg | NOTEST | 0,934558 | 1,91922 | 1,03817       | -1,29762      | 0,194419   | 1          | no  |
| AN11102 | ChrIII_A_nidulans_FGSC_A4:3079970-3082101  | WT_5hasex | WT_veg | OK     | 90,8122  | 101,56  | 0,161375      | -0,331314     | 0,740407   | 0,891143   | no  |
| AN11103 | ChrIII_A_nidulans_FGSC_A4:3075427-3077556  | WT_5hasex | WT_veg | NOTEST | 0,734899 | 1,03141 | 0,488995      | -0,460832     | 0,644919   | 1          | no  |
| AN11104 | ChrIII_A_nidulans_FGSC_A4:3043657-3045951  | WT_5hasex | WT_veg | OK     | 21,8139  | 45,7747 | 1,0693        | -2,12645      | 0,033466   | 0,132055   | no  |
| AN11105 | ChrIII_A_nidulans_FGSC_A4:2997160-2998569  | WT_5hasex | WT_veg | OK     | 2,41469  | 4,69219 | 0,958422      | -1,16953      | 0,242192   | 0,508806   | no  |
| AN11106 | ChrIII_A_nidulans_FGSC_A4:3078451-3079422  | WT_5hasex | WT_veg | OK     | 80,9038  | 158,208 | 0,967542      | -1,94339      | 0,0519691  | 0,182342   | no  |
| AN11107 | ChrIII_A_nidulans_FGSC_A4:3041279-3043375  | WT_5hasex | WT_veg | OK     | 7,36569  | 24,1831 | 1,71511       | -2,91309      | 0,00357875 | 0,02266    | yes |
| AN11108 | ChrIII_A_nidulans_FGSC_A4:2998616-2999711  | WT_5hasex | WT_veg | OK     | 2,17457  | 12,3114 | 2,5012        | -3,15286      | 0,00161679 | 0,0116972  | yes |
| AN11109 | ChrIII_A_nidulans_FGSC_A4:3109135-3109871  | WT_5hasex | WT_veg | OK     | 32,2515  | 132,766 | 2,04145       | -3,43655      | 0,00058917 | 0,00501194 | yes |
| AN11110 | ChrIII_A_nidulans_FGSC_A4:3074033-3074990  | WT_5hasex | WT_veg | OK     | 4,21773  | 8,2892  | 0,974766      | -1,26434      | 0,206108   | 0,46284    | no  |
| AN11111 | ChrIII_A_nidulans_FGSC_A4:2939761-2941488  | WT_5hasex | WT_veg | OK     | 10,2829  | 9,18119 | -0,1635       | 0,273031      | 0,784829   | 0,912344   | no  |
| AN11112 | ChrIII_A_nidulans_FGSC_A4:2901660-2903447  | WT_5hasex | WT_veg | OK     | 8,99372  | 16,8995 | 0,909994      | -1,52533      | 0,127177   | 0,340221   | no  |
| AN11113 | ChrIII_A_nidulans_FGSC_A4:2870007-2872755  | WT_5hasex | WT_veg | NOTEST | 0,263518 | 1,16411 | 2,14325       | -1,91336      | 0,0557022  | 1          | no  |
| AN11114 | ChrIII_A_nidulans_FGSC_A4:2854928-2856189  | WT_5hasex | WT_veg | NOTEST | 0,396846 | 0       | -1.79769e+308 | -1.79769e+308 | 0,133588   | 1          | no  |
| AN11115 | ChrIII_A_nidulans_FGSC_A4:2938095-2939580  | WT_5hasex | WT_veg | OK     | 20,8108  | 55,8074 | 1,42312       | -2,70243      | 0,00688342 | 0,0386111  | yes |
| AN11116 | ChrIII_A_nidulans_FGSC_A4:2941722-2943303  | WT_5hasex | WT_veg | OK     | 44,4453  | 57,6227 | 0,374608      | -0,750284     | 0,453083   | 0,714485   | no  |
| AN11117 | ChrIII_A_nidulans_FGSC_A4:2933353-2935494  | WT_5hasex | WT_veg | OK     | 77,5302  | 159,296 | 1,03888       | -1,98959      | 0,0466361  | 0,169053   | no  |
| AN11118 | ChrIII_A_nidulans_FGSC_A4:2900622-2901552  | WT_5hasex | WT_veg | OK     | 9,92773  | 31,0532 | 1,64521       | -2,47102      | 0,0134727  | 0,0658274  | no  |
| AN11119 | ChrIII_A_nidulans_FGSC_A4:2866805-2868667  | WT_5hasex | WT_veg | OK     | 83,3723  | 226,469 | 1,44168       | -2,92195      | 0,00347852 | 0,0221477  | yes |
| AN11112 | ChrIII_A_nidulans_FGSC_A4:1471119-1471867  | WT_5hasex | WT_veg | OK     | 98,9004  | 243,845 | 1,30192       | -2,67467      | 0,00748034 | 0,0413137  | yes |
| AN11120 | ChrIII_A_nidulans_FGSC_A4:2864047-2866029  | WT_5hasex | WT_veg | OK     | 22,8774  | 295,45  | 3,69092       | -6,61311      | 3,7634E-11 | 1,6462E-09 | yes |
| AN11121 | ChrIII_A_nidulans_FGSC_A4:2861615-2863283  | WT_5hasex | WT_veg | OK     | 17,0165  | 79,7528 | 2,2286        | -4,1654       | 3,1081E-05 | 0,00039551 | yes |
| AN11122 | ChrIII_A_nidulans_FGSC_A4:2852125-2853337  | WT_5hasex | WT_veg | NOTEST | 0,560652 | 1,1115  | 0,987325      | -0,710411     | 0,47745    | 1          | no  |
| AN11124 | ChrIII_A_nidulans_FGSC_A4:2913443-2913958  | WT_5hasex | WT_veg | OK     | 21,5149  | 51,5766 | 1,26138       | -2,01255      | 0,0441623  | 0,162183   | no  |
| AN11125 | ChrIII_A_nidulans_FGSC_A4:2649185-2651398  | WT_5hasex | WT_veg | OK     | 96,7913  | 138,347 | 0,515339      | -1,05857      | 0,289795   | 0,564529   | no  |
| AN11126 | ChrIII_A_nidulans_FGSC_A4:2638032-2639699  | WT_5hasex | WT_veg | OK     | 112,569  | 190,238 | 0,756989      | -1,51978      | 0,128567   | 0,342813   | no  |
| AN11127 | ChrIII_A_nidulans_FGSC_A4:2646914-2648786  | WT_5hasex | WT_veg | OK     | 18,0717  | 24,0889 | 0,414631      | -0,805527     | 0,420516   | 0,688664   | no  |
| AN11128 | ChrIII_A_nidulans_FGSC_A4:2634329-2637548  | WT_5hasex | WT_veg | OK     | 33,8077  | 55,2865 | 0,709577      | -1,48008      | 0,138852   | 0,36055    | no  |
| AN11129 | ChrIII_A_nidulans_FGSC_A4:2594752-2595957  | WT_5hasex | WT_veg | OK     | 78,9122  | 137,963 | 0,805956      | -1,67004      | 0,0949109  | 0,279051   | no  |
| AN11113 | ChrVIII_A_nidulans_FGSC_A4:1469650-1470432 | WT_5hasex | WT_veg | OK     | 11,7343  | 14,3745 | 0,292773      | -0,368524     | 0,712482   | 0,876511   | no  |
| AN11130 | ChrIII_A_nidulans_FGSC_A4:2547601-2549823  | WT_5hasex | WT_veg | OK     | 38,6708  | 89,1126 | 1,20438       | -2,41346      | 0,0158018  | 0,0744647  | no  |
| AN11131 | ChrIII_A_nidulans_FGSC_A4:2545174-2546867  | WT_5hasex | WT_veg | OK     | 100,186  | 205,663 | 1,03761       | -2,09275      | 0,0363712  | 0,140586   | no  |
| AN11132 | ChrIII_A_nidulans_FGSC_A4:2596490-2597927  | WT_5hasex | WT_veg | OK     | 50,2316  | 167,135 | 1,73434       | -3,42987      | 0,00060388 | 0,00511463 | yes |
| AN11133 | ChrIII_A_nidulans_FGSC_A4:2613886-2614448  | WT_5hasex | WT_veg | OK     | 104,699  | 115,853 | 0,146043      | -0,282656     | 0,777441   | 0,908995   | no  |
| AN11136 | ChrIII_A_nidulans_FGSC_A4:2584812-2585412  | WT_5hasex | WT_veg | OK     | 351,608  | 1054,52 | 1,58455       | -3,18918      | 0,00142678 | 0,0105334  | yes |
| AN11137 | ChrIII_A_nidulans_FGSC_A4:2559401-2564764  | WT_5hasex | WT_veg | OK     | 404,771  | 464,458 | 0,198442      | -0,402939     | 0,686993   | 0,862421   | no  |
| AN11138 | ChrIII_A_nidulans_FGSC_A4:2617818-2619847  | WT_5hasex | WT_veg | OK     | 42,1525  | 146,862 | 1,80077       | -3,74252      | 0,00018219 | 0,00184126 | yes |
| AN11114 | ChrVIII_A_nidulans_FGSC_A4:1467697-1469251 | WT_5hasex | WT_veg | OK     | 48,4747  | 35,6993 | -0,441336     | 0,847208      | 0,396879   | 0,669993   | no  |
| AN11140 | ChrVII_A_nidulans_FGSC_A4:562058-563855    | WT_5hasex | WT_veg | OK     | 57,8214  | 408,661 | 2,82123       | -4,98553      | 6,1791E-07 | 1,1966E-05 | yes |
| AN11141 | ChrVII_A_nidulans_FGSC_A4:550505-551453    | WT_5hasex | WT_veg | OK     | 19,3437  | 38,1665 | 0,980446      | -1,67691      | 0,09356    | 0,276295   | no  |
| AN11144 | ChrVII_A_nidulans_FGSC_A4:559185-560512    | WT_5hasex | WT_veg | NOTEST | 0,838668 | 3,86287 | 2,2035        | -2,33793      | 0,0193907  | 1          | no  |
| AN11146 | ChrVII_A_nidulans_FGSC_A4:572856-573695    | WT_5hasex | WT_veg | OK     | 94,2479  | 346,345 | 1,87768       | -3,56475      | 0,00036421 | 0,00331687 | yes |
| AN11148 | ChrVII_A_nidulans_FGSC_A4:549494-550310    | WT_5hasex | WT_veg | OK     | 14,8222  | 9,93317 | -0,577436     | 0,857859      | 0,39097    | 0,664148   | no  |
| AN11149 | ChrVII_A_nidulans_FGSC_A4:501383-503301    | WT_5hasex | WT_veg | OK     | 22,4186  | 6,6011  | -1,76392      | 2,67035       | 0,00757721 | 0,0417594  | yes |
| AN11115 | ChrVIII_A_nidulans_FGSC_A4:1464950-1466482 | WT_5hasex | WT_veg | OK     | 41,2783  | 93,7312 | 1,18315       | -2,26137      | 0,0237367  | 0,101373   | no  |

## Supplementary table 1

|         |                                            |           |        |        |          |          |               |               |            |            |     |
|---------|--------------------------------------------|-----------|--------|--------|----------|----------|---------------|---------------|------------|------------|-----|
| AN11151 | ChrVII_A_nidulans_FGSC_A4:398429-399838    | WT_5hasex | WT_veg | OK     | 0,804656 | 12,5743  | 3,96596       | -4,13089      | 3,6136E-05 | 0,00045183 | yes |
| AN11153 | ChrVII_A_nidulans_FGSC_A4:400280-402063    | WT_5hasex | WT_veg | OK     | 4,735    | 6,10861  | 0,36748       | -0,449039     | 0,653404   | 0,843549   | no  |
| AN11154 | ChrVII_A_nidulans_FGSC_A4:402419-403035    | WT_5hasex | WT_veg | OK     | 92,6678  | 341,964  | 1,8837        | -3,55129      | 0,00038334 | 0,00346464 | yes |
| AN11156 | ChrVII_A_nidulans_FGSC_A4:273166-274414    | WT_5hasex | WT_veg | NOTEST | 0,286913 | 0,567578 | 0,984203      | -0,52961      | 0,596382   | 1          | no  |
| AN11157 | ChrVII_A_nidulans_FGSC_A4:274583-275395    | WT_5hasex | WT_veg | NOTEST | 0,242558 | 1,13089  | 2,22106       | -1,14626      | 0,251686   | 1          | no  |
| AN11158 | ChrVII_A_nidulans_FGSC_A4:123110-124327    | WT_5hasex | WT_veg | OK     | 20,9981  | 27,4086  | 0,384372      | -0,691974     | 0,488954   | 0,741962   | no  |
| AN11159 | ChrVII_A_nidulans_FGSC_A4:62472-64007      | WT_5hasex | WT_veg | NOTEST | 0        | 2,79567  | 1.79769e+308  | 1.79769e+308  | 0,00216344 | 1          | no  |
| AN11116 | ChrVIII_A_nidulans_FGSC_A4:1461319-1463272 | WT_5hasex | WT_veg | OK     | 54,6932  | 47,8939  | -0,19152      | 0,396477      | 0,691753   | 0,864642   | no  |
| AN11160 | ChrVII_A_nidulans_FGSC_A4:124830-125619    | WT_5hasex | WT_veg | OK     | 3,29321  | 3,99957  | 0,280349      | -0,315806     | 0,75215    | 0,896876   | no  |
| AN11161 | ChrVII_A_nidulans_FGSC_A4:60984-62376      | WT_5hasex | WT_veg | OK     | 10,9909  | 106,544  | 3,27707       | -5,60229      | 2,1154E-08 | 5,7021E-07 | yes |
| AN11162 | ChrVI_A_nidulans_FGSC_A4:563364-566032     | WT_5hasex | WT_veg | OK     | 17,8568  | 88,422   | 2,30793       | -4,65213      | 3,2853E-06 | 5,3382E-05 | yes |
| AN11163 | ChrVI_A_nidulans_FGSC_A4:483636-487941     | WT_5hasex | WT_veg | OK     | 22,9144  | 56,2258  | 1,29498       | -2,61026      | 0,00904745 | 0,0481373  | yes |
| AN11164 | ChrVI_A_nidulans_FGSC_A4:433673-436116     | WT_5hasex | WT_veg | OK     | 60,7191  | 82,475   | 0,441806      | -0,913598     | 0,360928   | 0,635508   | no  |
| AN11165 | ChrVI_A_nidulans_FGSC_A4:401396-402767     | WT_5hasex | WT_veg | OK     | 17,4491  | 39,602   | 1,18242       | -2,12656      | 0,0334565  | 0,132037   | no  |
| AN11167 | ChrVI_A_nidulans_FGSC_A4:338556-340172     | WT_5hasex | WT_veg | OK     | 35,2092  | 16,4801  | -1,09523      | 2,18928       | 0,0285768  | 0,116717   | no  |
| AN11168 | ChrVI_A_nidulans_FGSC_A4:316648-317895     | WT_5hasex | WT_veg | OK     | 93,9909  | 116,579  | 0,310715      | -0,642981     | 0,520236   | 0,763711   | no  |
| AN11169 | ChrVI_A_nidulans_FGSC_A4:283761-286062     | WT_5hasex | WT_veg | OK     | 19,7948  | 63,564   | 1,68309       | -3,33181      | 0,00086282 | 0,00693776 | yes |
| AN11117 | ChrVIII_A_nidulans_FGSC_A4:1459166-1460977 | WT_5hasex | WT_veg | OK     | 97,2446  | 140,196  | 0,527757      | -1,05904      | 0,289581   | 0,564315   | no  |
| AN11170 | ChrVI_A_nidulans_FGSC_A4:266686-269201     | WT_5hasex | WT_veg | NOTEST | 0        | 0        | 0             | 0             | 1          | 1          | no  |
| AN11171 | ChrVI_A_nidulans_FGSC_A4:262056-262894     | WT_5hasex | WT_veg | NOTEST | 1,68542  | 1,85154  | 0,135613      | -0,0919157    | 0,926765   | 1          | no  |
| AN11172 | ChrVI_A_nidulans_FGSC_A4:241952-242813     | WT_5hasex | WT_veg | OK     | 75,866   | 104,137  | 0,45696       | -0,722079     | 0,470246   | 0,728228   | no  |
| AN11173 | ChrVI_A_nidulans_FGSC_A4:560739-562397     | WT_5hasex | WT_veg | OK     | 22,8077  | 41,5547  | 0,865491      | -1,5115       | 0,130662   | 0,346382   | no  |
| AN11174 | ChrVI_A_nidulans_FGSC_A4:436742-439406     | WT_5hasex | WT_veg | OK     | 13,6952  | 17,3229  | 0,339016      | -0,628198     | 0,529874   | 0,769474   | no  |
| AN11175 | ChrVI_A_nidulans_FGSC_A4:413289-413838     | WT_5hasex | WT_veg | OK     | 103,04   | 144,07   | 0,483566      | -0,951871     | 0,341162   | 0,61683    | no  |
| AN11176 | ChrVI_A_nidulans_FGSC_A4:402777-403737     | WT_5hasex | WT_veg | OK     | 19,0413  | 60,7066  | 1,67272       | -2,93703      | 0,00331369 | 0,0212642  | yes |
| AN11177 | ChrVI_A_nidulans_FGSC_A4:398999-400094     | WT_5hasex | WT_veg | OK     | 1,96834  | 4,33165  | 1,13794       | -1,25582      | 0,209181   | 0,466984   | no  |
| AN11178 | ChrVI_A_nidulans_FGSC_A4:336397-338117     | WT_5hasex | WT_veg | OK     | 17,63    | 18,1256  | 0,0399957     | -0,0731994    | 0,941647   | 0,978217   | no  |
| AN11118 | ChrVIII_A_nidulans_FGSC_A4:1456801-1458936 | WT_5hasex | WT_veg | OK     | 66,7205  | 101,71   | 0,608262      | -1,23971      | 0,215084   | 0,4748     | no  |
| AN11180 | ChrVI_A_nidulans_FGSC_A4:269682-271447     | WT_5hasex | WT_veg | OK     | 3,19068  | 4,16928  | 0,385937      | -0,514414     | 0,606963   | 0,817431   | no  |
| AN11181 | ChrVI_A_nidulans_FGSC_A4:312977-316472     | WT_5hasex | WT_veg | OK     | 16,063   | 18,4354  | 0,198739      | -0,389041     | 0,697246   | 0,867761   | no  |
| AN11182 | ChrVI_A_nidulans_FGSC_A4:482116-483279     | WT_5hasex | WT_veg | NOTEST | 1,20126  | 3,02257  | 1,33123       | -1,23956      | 0,21514    | 1          | no  |
| AN11183 | ChrVI_A_nidulans_FGSC_A4:566349-566958     | WT_5hasex | WT_veg | OK     | 181,44   | 309,753  | 0,771628      | -1,5778       | 0,114611   | 0,317581   | no  |
| AN11185 | ChrVI_A_nidulans_FGSC_A4:280834-283273     | WT_5hasex | WT_veg | OK     | 62,3415  | 107,361  | 0,784209      | -1,63678      | 0,101677   | 0,293009   | no  |
| AN11187 | ChrVI_A_nidulans_FGSC_A4:243148-245618     | WT_5hasex | WT_veg | OK     | 26,4444  | 38,1229  | 0,527698      | -0,839647     | 0,401106   | 0,672975   | no  |
| AN11188 | ChrVI_A_nidulans_FGSC_A4:195938-197155     | WT_5hasex | WT_veg | OK     | 28,0588  | 43,6454  | 0,637379      | -1,18408      | 0,23638    | 0,501744   | no  |
| AN11189 | ChrVI_A_nidulans_FGSC_A4:193500-195352     | WT_5hasex | WT_veg | OK     | 38,2203  | 37,6727  | -0,0208178    | 0,0326993     | 0,973914   | 0,990798   | no  |
| AN11119 | ChrVIII_A_nidulans_FGSC_A4:1455470-1455833 | WT_5hasex | WT_veg | OK     | 36,544   | 43,3815  | 0,247443      | -0,381218     | 0,703042   | 0,871189   | no  |
| AN11190 | ChrVI_A_nidulans_FGSC_A4:173073-174941     | WT_5hasex | WT_veg | OK     | 1,65532  | 4,9287   | 1,5741        | -2,05542      | 0,0398385  | 0,150416   | no  |
| AN11191 | ChrVI_A_nidulans_FGSC_A4:65976-73676       | WT_5hasex | WT_veg | NOTEST | 0,483246 | 0,106128 | -2,18696      | 1,46896       | 0,141843   | 1          | no  |
| AN11193 | ChrVI_A_nidulans_FGSC_A4:23862-26138       | WT_5hasex | WT_veg | NOTEST | 0        | 0        | 0             | 0             | 1          | 1          | no  |
| AN11194 | ChrVI_A_nidulans_FGSC_A4:20153-21606       | WT_5hasex | WT_veg | NOTEST | 0        | 0        | 0             | 0             | 1          | 1          | no  |
| AN11195 | ChrVI_A_nidulans_FGSC_A4:175119-176528     | WT_5hasex | WT_veg | OK     | 3,53008  | 8,27454  | 1,22898       | -1,64533      | 0,0999016  | 0,289165   | no  |
| AN11196 | ChrVI_A_nidulans_FGSC_A4:197423-199305     | WT_5hasex | WT_veg | OK     | 15,2897  | 1,45607  | -3,39241      | 4,22681       | 2,3703E-05 | 0,00030983 | yes |
| AN11197 | ChrVI_A_nidulans_FGSC_A4:190540-193213     | WT_5hasex | WT_veg | OK     | 11,5527  | 17,2018  | 0,57433       | -0,889021     | 0,373992   | 0,648701   | no  |
| AN11198 | ChrVI_A_nidulans_FGSC_A4:63156-64562       | WT_5hasex | WT_veg | NOTEST | 1,87827  | 0        | -1.79769e+308 | -1.79769e+308 | 0,0183871  | 1          | no  |
| AN11199 | ChrVI_A_nidulans_FGSC_A4:64665-65569       | WT_5hasex | WT_veg | OK     | 2,32013  | 0        | -1.79769e+308 | -1.79769e+308 | 0,0244862  | 0,103687   | no  |
| AN1120  | ChrVIII_A_nidulans_FGSC_A4:1453506-1454931 | WT_5hasex | WT_veg | OK     | 20,8618  | 28,7379  | 0,462087      | -0,866176     | 0,386394   | 0,660108   | no  |
| AN11200 | ChrVI_A_nidulans_FGSC_A4:49063-49811       | WT_5hasex | WT_veg | OK     | 51,3351  | 92,8688  | 0,855247      | -1,61971      | 0,105294   | 0,300278   | no  |
| AN11201 | ChrVI_A_nidulans_FGSC_A4:22216-23434       | WT_5hasex | WT_veg | NOTEST | 0        | 0        | 0             | 0             | 1          | 1          | no  |
| AN11202 | ChrVI_A_nidulans_FGSC_A4:18451-19791       | WT_5hasex | WT_veg | NOTEST | 0,25124  | 0        | -1.79769e+308 | -1.79769e+308 | 0,137528   | 1          | no  |
| AN11203 | ChrVIII_A_nidulans_FGSC_A4:10307-12236     | WT_5hasex | WT_veg | NOTEST | 0        | 0,249157 | 1.79769e+308  | 1.79769e+308  | 0,21742    | 1          | no  |
| AN11204 | ChrVIII_A_nidulans_FGSC_A4:9568-10237      | WT_5hasex | WT_veg | NOTEST | 0,659533 | 0,746154 | 0,178029      | -0,0368367    | 0,970615   | 1          | no  |
| AN11205 | ChrVIII_A_nidulans_FGSC_A4:73742-75060     | WT_5hasex | WT_veg | NOTEST | 0,885846 | 0        | -1.79769e+308 | -1.79769e+308 | 0,0368957  | 1          | no  |

## Supplementary table 1

|         |                                            |           |        |        |          |          |               |               |            |            |     |
|---------|--------------------------------------------|-----------|--------|--------|----------|----------|---------------|---------------|------------|------------|-----|
| AN11206 | ChrVIII_A_nidulans_FGSC_A4:84894-86471     | WT_5hasex | WT_veg | NOTEST | 0,48001  | 0        | -1.79769e+308 | -1.79769e+308 | 0,0561526  | 1          | no  |
| AN11207 | ChrVIII_A_nidulans_FGSC_A4:126199-127021   | WT_5hasex | WT_veg | OK     | 30,3073  | 0,223186 | -7,08527      | 2,40449       | 0,0161948  | 0,0759071  | no  |
| AN11208 | ChrVIII_A_nidulans_FGSC_A4:131022-132165   | WT_5hasex | WT_veg | NOTEST | 1,20063  | 2,39638  | 0,997068      | -0,95373      | 0,34022    | 1          | no  |
| AN11209 | ChrVIII_A_nidulans_FGSC_A4:133391-135054   | WT_5hasex | WT_veg | OK     | 6,68918  | 59,8003  | 3,16025       | -4,58337      | 4,5754E-06 | 7,14E-05   | yes |
| AN1121  | ChrVIII_A_nidulans_FGSC_A4:1451839-1453175 | WT_5hasex | WT_veg | OK     | 39,8308  | 55,0372  | 0,466523      | -0,937274     | 0,348618   | 0,624428   | no  |
| AN11210 | ChrVIII_A_nidulans_FGSC_A4:224076-224877   | WT_5hasex | WT_veg | OK     | 12,9606  | 43,8456  | 1,7583        | -2,71452      | 0,00663722 | 0,0375274  | yes |
| AN11212 | ChrVIII_A_nidulans_FGSC_A4:318368-322179   | WT_5hasex | WT_veg | NOTEST | 0,215507 | 0,388479 | 0,8501        | -0,494944     | 0,62064    | 1          | no  |
| AN11214 | ChrVIII_A_nidulans_FGSC_A4:73056-73545     | WT_5hasex | WT_veg | NOTEST | 0,91091  | 0        | -1.79769e+308 | -1.79769e+308 | 0,107729   | 1          | no  |
| AN11215 | ChrVIII_A_nidulans_FGSC_A4:225489-228452   | WT_5hasex | WT_veg | OK     | 14,2309  | 71,754   | 2,33403       | -2,96954      | 0,00298248 | 0,0194654  | yes |
| AN11216 | ChrVIII_A_nidulans_FGSC_A4:448800-450798   | WT_5hasex | WT_veg | OK     | 2,46731  | 9,30255  | 1,91469       | -2,63304      | 0,00846241 | 0,0456127  | yes |
| AN11217 | ChrVIII_A_nidulans_FGSC_A4:82442-84425     | WT_5hasex | WT_veg | OK     | 1,85346  | 0,21378  | -3,11603      | 1,92237       | 0,0545598  | 0,188778   | no  |
| AN11218 | ChrVIII_A_nidulans_FGSC_A4:124960-125711   | WT_5hasex | WT_veg | NOTEST | 0,347071 | 0        | -1.79769e+308 | -1.79769e+308 | 0,23809    | 1          | no  |
| AN11219 | ChrVIII_A_nidulans_FGSC_A4:291385-292898   | WT_5hasex | WT_veg | OK     | 4,21722  | 21,1049  | 2,32322       | -2,90374      | 0,00368737 | 0,023238   | yes |
| AN1122  | ChrVIII_A_nidulans_FGSC_A4:1450719-1451798 | WT_5hasex | WT_veg | OK     | 1419,77  | 2206,89  | 0,636359      | -1,06875      | 0,28518    | 0,559282   | no  |
| AN11221 | ChrVIII_A_nidulans_FGSC_A4:338459-339876   | WT_5hasex | WT_veg | OK     | 10,0686  | 26,9596  | 1,42093       | -2,40039      | 0,0163776  | 0,0765447  | no  |
| AN11222 | ChrVIII_A_nidulans_FGSC_A4:128904-130588   | WT_5hasex | WT_veg | NOTEST | 0,696035 | 3,79871  | 2,44828       | -2,62865      | 0,0085725  | 1          | no  |
| AN11223 | ChrVIII_A_nidulans_FGSC_A4:135706-138087   | WT_5hasex | WT_veg | NOTEST | 0        | 0        | 0             | 0             | 1          | 1          | no  |
| AN11224 | ChrII_A_nidulans_FGSC_A4:1483988-1485111   | WT_5hasex | WT_veg | OK     | 26,363   | 103,172  | 1,96847       | -3,70824      | 0,0002087  | 0,00206738 | yes |
| AN11225 | ChrII_A_nidulans_FGSC_A4:1485768-1487480   | WT_5hasex | WT_veg | OK     | 19,8917  | 49,9564  | 1,3285        | -2,59151      | 0,00955564 | 0,0502493  | no  |
| AN11226 | ChrII_A_nidulans_FGSC_A4:1488140-1489119   | WT_5hasex | WT_veg | OK     | 76,8731  | 93,6537  | 0,284856      | -0,565947     | 0,57143    | 0,796088   | no  |
| AN11228 | ChrV_A_nidulans_FGSC_A4:3236508-3238539    | WT_5hasex | WT_veg | NOTEST | 0        | 0        | 0             | 0             | 1          | 1          | no  |
| AN1123  | ChrVIII_A_nidulans_FGSC_A4:1448186-1450313 | WT_5hasex | WT_veg | OK     | 11,6666  | 48,0843  | 2,04318       | -3,66057      | 0,00025165 | 0,00242903 | yes |
| AN11230 | ChrIII_A_nidulans_FGSC_A4:1948639-1949402  | WT_5hasex | WT_veg | OK     | 54,6492  | 165,118  | 1,59523       | -3,11043      | 0,00186815 | 0,0131815  | yes |
| AN11231 | ChrIII_A_nidulans_FGSC_A4:1945837-1947650  | WT_5hasex | WT_veg | OK     | 107,101  | 163,263  | 0,608216      | -1,2363       | 0,216346   | 0,476417   | no  |
| AN11232 | ChrIII_A_nidulans_FGSC_A4:879994-881581    | WT_5hasex | WT_veg | OK     | 10,2352  | 24,4361  | 1,25547       | -2,1428       | 0,032129   | 0,127957   | no  |
| AN11233 | ChrIII_A_nidulans_FGSC_A4:882195-884534    | WT_5hasex | WT_veg | OK     | 47,3967  | 88,5696  | 0,902026      | -1,69791      | 0,0895243  | 0,268164   | no  |
| AN11234 | ChrVIII_A_nidulans_FGSC_A4:4011745-4012287 | WT_5hasex | WT_veg | OK     | 152,368  | 294,324  | 0,94984       | -1,92652      | 0,0540394  | 0,18746    | no  |
| AN11238 | ChrII_A_nidulans_FGSC_A4:2947006-2947662   | WT_5hasex | WT_veg | OK     | 95,3041  | 488,397  | 2,35745       | -4,41161      | 1,026E-05  | 0,00014722 | yes |
| AN1124  | ChrVIII_A_nidulans_FGSC_A4:1445138-1447273 | WT_5hasex | WT_veg | OK     | 20,7503  | 78,2029  | 1,91409       | -3,62548      | 0,00028843 | 0,00272817 | yes |
| AN11243 | ChrV_A_nidulans_FGSC_A4:2264715-2266456    | WT_5hasex | WT_veg | OK     | 33,282   | 37,6681  | 0,178599      | -0,358161     | 0,720223   | 0,880238   | no  |
| AN11244 | ChrI_A_nidulans_FGSC_A4:874535-876367      | WT_5hasex | WT_veg | OK     | 119,953  | 241,368  | 1,00877       | -2,08005      | 0,0375206  | 0,143868   | no  |
| AN11245 | ChrI_A_nidulans_FGSC_A4:872815-874019      | WT_5hasex | WT_veg | OK     | 4,03144  | 8,29957  | 1,04174       | -1,43856      | 0,150275   | 0,379482   | no  |
| AN11246 | ChrIII_A_nidulans_FGSC_A4:3186081-3186951  | WT_5hasex | WT_veg | OK     | 114,186  | 28,5237  | -2,00115      | 3,73155       | 0,0001903  | 0,00190965 | yes |
| AN11250 | ChrI_A_nidulans_FGSC_A4:3533196-3534601    | WT_5hasex | WT_veg | OK     | 39,5933  | 101,433  | 1,3572        | -2,63237      | 0,00847923 | 0,0456846  | yes |
| AN11251 | ChrVI_A_nidulans_FGSC_A4:3284296-3284999   | WT_5hasex | WT_veg | OK     | 2,20151  | 3,70198  | 0,749802      | -0,727235     | 0,467082   | 0,725796   | no  |
| AN11252 | ChrVII_A_nidulans_FGSC_A4:891748-895216    | WT_5hasex | WT_veg | OK     | 66,8462  | 122,986  | 0,87958       | -1,82035      | 0,0687058  | 0,222531   | no  |
| AN11253 | ChrIII_A_nidulans_FGSC_A4:654564-655594    | WT_5hasex | WT_veg | OK     | 14,4025  | 12,5752  | -0,195743     | 0,316079      | 0,751942   | 0,896772   | no  |
| AN11254 | ChrVI_A_nidulans_FGSC_A4:1292603-1293470   | WT_5hasex | WT_veg | OK     | 15,0089  | 37,0146  | 1,30228       | -2,10674      | 0,0351405  | 0,13693    | no  |
| AN11260 | ChrVIII_A_nidulans_FGSC_A4:4418790-4419045 | WT_5hasex | WT_veg | OK     | 2,93086  | 6,14568  | 1,06825       | -0,778176     | 0,436465   | 0,701621   | no  |
| AN11261 | ChrVIII_A_nidulans_FGSC_A4:4393838-4394143 | WT_5hasex | WT_veg | NOTEST | 0        | 0        | 0             | 0             | 1          | 1          | no  |
| AN11262 | ChrVIII_A_nidulans_FGSC_A4:4360413-4360972 | WT_5hasex | WT_veg | OK     | 3,11419  | 26,7515  | 3,10269       | -3,43548      | 0,00059151 | 0,00502829 | yes |
| AN11267 | ChrVIII_A_nidulans_FGSC_A4:3910501-3910836 | WT_5hasex | WT_veg | NOTEST | 0        | 3,60834  | 1.79769e+308  | 1.79769e+308  | 0,123323   | 1          | no  |
| AN1127  | ChrVIII_A_nidulans_FGSC_A4:1441026-1442634 | WT_5hasex | WT_veg | OK     | 37,6294  | 49,3643  | 0,391607      | -0,794375     | 0,426977   | 0,693926   | no  |
| AN11274 | ChrVIII_A_nidulans_FGSC_A4:3197793-3198127 | WT_5hasex | WT_veg | OK     | 8,4565   | 1,37168  | -2,62412      | 1,61651       | 0,105985   | 0,301809   | no  |
| AN11276 | ChrVIII_A_nidulans_FGSC_A4:3096063-3096736 | WT_5hasex | WT_veg | NOTEST | 0        | 0        | 0             | 0             | 1          | 1          | no  |
| AN11278 | ChrVIII_A_nidulans_FGSC_A4:2869948-2870655 | WT_5hasex | WT_veg | OK     | 338,621  | 450,381  | 0,411477      | -0,830884     | 0,406039   | 0,677017   | no  |
| AN1128  | ChrVIII_A_nidulans_FGSC_A4:1437536-1440286 | WT_5hasex | WT_veg | OK     | 26,6067  | 36,0175  | 0,43691       | -0,86255      | 0,388385   | 0,661811   | no  |
| AN11280 | ChrVIII_A_nidulans_FGSC_A4:2603061-2603419 | WT_5hasex | WT_veg | OK     | 12,0739  | 21,1975  | 0,812001      | -0,982508     | 0,32585    | 0,602439   | no  |
| AN11281 | ChrVIII_A_nidulans_FGSC_A4:2469509-2470122 | WT_5hasex | WT_veg | OK     | 63,2932  | 1081,66  | 4,09505       | -7,65591      | 1,9096E-14 | 1,3307E-12 | yes |
| AN11287 | ChrVIII_A_nidulans_FGSC_A4:1730702-1731107 | WT_5hasex | WT_veg | NOTEST | 0        | 0        | 0             | 0             | 1          | 1          | no  |
| AN11288 | ChrVIII_A_nidulans_FGSC_A4:1717114-1717296 | WT_5hasex | WT_veg | NOTEST | 0        | 0        | 0             | 0             | 1          | 1          | no  |
| AN1129  | ChrVIII_A_nidulans_FGSC_A4:1434527-1436559 | WT_5hasex | WT_veg | OK     | 5,93201  | 18,6883  | 1,65554       | -2,53702      | 0,01118    | 0,0568515  | no  |
| AN11290 | ChrVIII_A_nidulans_FGSC_A4:1692350-1692509 | WT_5hasex | WT_veg | OK     | 1,98723  | 33,7301  | 4,08521       | -1,94951      | 0,0512351  | 0,180505   | no  |

## Supplementary table 1

|         |                                            |           |        |        |          |         |               |               |            |            |     |
|---------|--------------------------------------------|-----------|--------|--------|----------|---------|---------------|---------------|------------|------------|-----|
| AN11292 | ChrVIII_A_nidulans_FGSC_A4:1613846-1614759 | WT_5hasex | WT_veg | NOTEST | 0        | 0       | 0             | 0             | 1          | 1          | no  |
| AN11130 | ChrVIII_A_nidulans_FGSC_A4:1428366-1432109 | WT_5hasex | WT_veg | OK     | 10,7492  | 13,0857 | 0,283755      | -0,544358     | 0,586195   | 0,805079   | no  |
| AN11301 | ChrVII_A_nidulans_FGSC_A4:724732-725217    | WT_5hasex | WT_veg | OK     | 5,88024  | 1,32426 | -2,15069      | 0,693378      | 0,488072   | 0,741397   | no  |
| AN11303 | ChrVII_A_nidulans_FGSC_A4:828708-829440    | WT_5hasex | WT_veg | OK     | 516,251  | 841,926 | 0,70562       | -1,38224      | 0,166898   | 0,405913   | no  |
| AN11304 | ChrVII_A_nidulans_FGSC_A4:833968-834449    | WT_5hasex | WT_veg | OK     | 141,329  | 212,826 | 0,590621      | -1,14979      | 0,25023    | 0,518734   | no  |
| AN11306 | ChrVII_A_nidulans_FGSC_A4:1114256-1114475  | WT_5hasex | WT_veg | OK     | 9,51378  | 21,456  | 1,17329       | -1,12359      | 0,261188   | 0,531729   | no  |
| AN1131  | ChrVIII_A_nidulans_FGSC_A4:1426292-1427002 | WT_5hasex | WT_veg | OK     | 8,20107  | 16,5853 | 1,01602       | -1,41192      | 0,157975   | 0,392238   | no  |
| AN11312 | ChrVII_A_nidulans_FGSC_A4:1606903-1607535  | WT_5hasex | WT_veg | OK     | 36,55    | 77,6548 | 1,0872        | -1,87326      | 0,0610327  | 0,204648   | no  |
| AN11313 | ChrVII_A_nidulans_FGSC_A4:1751471-1751953  | WT_5hasex | WT_veg | OK     | 5,67334  | 141,02  | 4,63556       | -4,91266      | 8,9848E-07 | 1,6696E-05 | yes |
| AN11314 | ChrVII_A_nidulans_FGSC_A4:1845552-1845959  | WT_5hasex | WT_veg | OK     | 65,7153  | 839,826 | 3,67579       | -6,04143      | 1,5275E-09 | 5,1776E-08 | yes |
| AN11317 | ChrVII_A_nidulans_FGSC_A4:2081857-2082667  | WT_5hasex | WT_veg | OK     | 2007,55  | 1535,4  | -0,386819     | 0,688292      | 0,491269   | 0,743532   | no  |
| AN11321 | ChrVII_A_nidulans_FGSC_A4:2507175-2507759  | WT_5hasex | WT_veg | OK     | 0        | 3,93804 | 1.79769e+308  | 1.79769e+308  | 0,123323   | 0,333265   | no  |
| AN11329 | ChrVII_A_nidulans_FGSC_A4:3125974-3126294  | WT_5hasex | WT_veg | OK     | 1,39827  | 6,51927 | 2,22106       | -1,14626      | 0,251686   | 0,52039    | no  |
| AN1133  | ChrVIII_A_nidulans_FGSC_A4:1420279-1421442 | WT_5hasex | WT_veg | OK     | 229,14   | 524,366 | 1,19435       | -2,43496      | 0,0148934  | 0,0711433  | no  |
| AN11332 | ChrVII_A_nidulans_FGSC_A4:3469350-3470311  | WT_5hasex | WT_veg | OK     | 114,991  | 137,171 | 0,254457      | -0,519474     | 0,603431   | 0,815336   | no  |
| AN11337 | ChrVII_A_nidulans_FGSC_A4:3828605-3828956  | WT_5hasex | WT_veg | OK     | 499,551  | 98,2449 | -2,34618      | 4,49383       | 6,9953E-06 | 0,00010473 | yes |
| AN11340 | ChrVII_A_nidulans_FGSC_A4:3970340-3970632  | WT_5hasex | WT_veg | OK     | 4,40302  | 17,9374 | 2,02641       | -2,0371       | 0,0416402  | 0,155307   | no  |
| AN11341 | ChrVII_A_nidulans_FGSC_A4:3985228-3985716  | WT_5hasex | WT_veg | OK     | 0,956858 | 12,1852 | 3,67068       | -1,72991      | 0,0836466  | 0,255747   | no  |
| AN11344 | ChrVII_A_nidulans_FGSC_A4:4105202-4105639  | WT_5hasex | WT_veg | OK     | 47,9872  | 95,7422 | 0,996504      | -1,53193      | 0,125541   | 0,337339   | no  |
| AN11347 | ChrVII_A_nidulans_FGSC_A4:4229021-4230051  | WT_5hasex | WT_veg | OK     | 907,966  | 717,559 | -0,339541     | 0,642174      | 0,520761   | 0,764054   | no  |
| AN11348 | ChrVII_A_nidulans_FGSC_A4:4355026-4355537  | WT_5hasex | WT_veg | NOTEST | 0,866217 | 0       | -1.79769e+308 | -1.79769e+308 | 0,224063   | 1          | no  |
| AN11356 | ChrVI_A_nidulans_FGSC_A4:3327227-3327964   | WT_5hasex | WT_veg | NOTEST | 0        | 0       | 0             | 0             | 1          | 1          | no  |
| AN11359 | ChrVI_A_nidulans_FGSC_A4:3204982-3205564   | WT_5hasex | WT_veg | OK     | 77,9898  | 79,6804 | 0,03094       | -0,0533561    | 0,957448   | 0,984232   | no  |
| AN11364 | ChrVI_A_nidulans_FGSC_A4:2823796-2824236   | WT_5hasex | WT_veg | NOTEST | 0        | 0       | 0             | 0             | 1          | 1          | no  |
| AN11365 | ChrVI_A_nidulans_FGSC_A4:2817418-2817754   | WT_5hasex | WT_veg | NOTEST | 0        | 0       | 0             | 0             | 1          | 1          | no  |
| AN11366 | ChrVI_A_nidulans_FGSC_A4:2811809-2812181   | WT_5hasex | WT_veg | NOTEST | 0        | 0       | 0             | 0             | 1          | 1          | no  |
| AN11374 | ChrVI_A_nidulans_FGSC_A4:2251026-2251347   | WT_5hasex | WT_veg | OK     | 21,0807  | 67,3487 | 1,67573       | -2,3611       | 0,0182209  | 0,0828973  | no  |
| AN11375 | ChrVI_A_nidulans_FGSC_A4:1695964-1696432   | WT_5hasex | WT_veg | NOTEST | 0        | 0       | 0             | 0             | 1          | 1          | no  |
| AN11376 | ChrVI_A_nidulans_FGSC_A4:1694804-1695318   | WT_5hasex | WT_veg | OK     | 14,4803  | 10,2186 | -0,502892     | 0,668498      | 0,503816   | 0,752331   | no  |
| AN11377 | ChrVI_A_nidulans_FGSC_A4:1637686-1638209   | WT_5hasex | WT_veg | OK     | 208,537  | 284,619 | 0,448729      | -0,916682     | 0,359309   | 0,634028   | no  |
| AN11378 | ChrVI_A_nidulans_FGSC_A4:1462209-1462868   | WT_5hasex | WT_veg | OK     | 38,0775  | 32,1461 | -0,244296     | 0,410024      | 0,681788   | 0,859509   | no  |
| AN11387 | ChrVI_A_nidulans_FGSC_A4:1100126-1100782   | WT_5hasex | WT_veg | OK     | 4,16543  | 10,6273 | 1,35124       | -1,0424       | 0,297226   | 0,572451   | no  |
| AN11389 | ChrVI_A_nidulans_FGSC_A4:1068543-1069277   | WT_5hasex | WT_veg | NOTEST | 0        | 3,6594  | 1.79769e+308  | 1.79769e+308  | 0,123323   | 1          | no  |
| AN11391 | ChrVI_A_nidulans_FGSC_A4:972038-972320     | WT_5hasex | WT_veg | OK     | 16,3877  | 120,125 | 2,87384       | -3,86254      | 0,00011221 | 0,00121417 | yes |
| AN11392 | ChrVI_A_nidulans_FGSC_A4:914230-914547     | WT_5hasex | WT_veg | NOTEST | 0        | 0       | 0             | 0             | 1          | 1          | no  |
| AN11395 | ChrVI_A_nidulans_FGSC_A4:792666-793418     | WT_5hasex | WT_veg | OK     | 190,846  | 157,463 | -0,277392     | 0,569975      | 0,568694   | 0,794453   | no  |
| AN11406 | ChrII_A_nidulans_FGSC_A4:3532947-3533230   | WT_5hasex | WT_veg | OK     | 89,7023  | 355,16  | 1,98525       | -3,3922       | 0,00069334 | 0,0057488  | yes |
| AN11408 | ChrII_A_nidulans_FGSC_A4:3437091-3437618   | WT_5hasex | WT_veg | NOTEST | 0,885078 | 0       | -1.79769e+308 | -1.79769e+308 | 0,165569   | 1          | no  |
| AN11410 | ChrII_A_nidulans_FGSC_A4:3375972-3376495   | WT_5hasex | WT_veg | NOTEST | 0        | 0       | 0             | 0             | 1          | 1          | no  |
| AN11411 | ChrII_A_nidulans_FGSC_A4:3309464-3310584   | WT_5hasex | WT_veg | OK     | 1735,41  | 3290,32 | 0,92295       | -1,54435      | 0,122505   | 0,332049   | no  |
| AN11419 | ChrII_A_nidulans_FGSC_A4:2841409-2842362   | WT_5hasex | WT_veg | OK     | 969,4    | 1169,34 | 0,270525      | -0,479014     | 0,631929   | 0,831433   | no  |
| AN1142  | ChrVIII_A_nidulans_FGSC_A4:1401097-1403018 | WT_5hasex | WT_veg | OK     | 9,96454  | 30,7791 | 1,62708       | -2,83899      | 0,00452571 | 0,0274614  | yes |
| AN11425 | ChrII_A_nidulans_FGSC_A4:2305266-2306037   | WT_5hasex | WT_veg | OK     | 25,8533  | 63,639  | 1,29956       | -1,83081      | 0,0671294  | 0,218886   | no  |
| AN1143  | ChrVIII_A_nidulans_FGSC_A4:1397551-1399774 | WT_5hasex | WT_veg | OK     | 97,5723  | 85,8276 | -0,185029     | 0,373893      | 0,708484   | 0,87419    | no  |
| AN11431 | ChrII_A_nidulans_FGSC_A4:1779486-1780055   | WT_5hasex | WT_veg | OK     | 2,13885  | 6,46599 | 1,59603       | -1,26915      | 0,204386   | 0,460577   | no  |
| AN11432 | ChrII_A_nidulans_FGSC_A4:1598481-1598819   | WT_5hasex | WT_veg | OK     | 7,24538  | 4,06642 | -0,833303     | 0,535786      | 0,592106   | 0,808072   | no  |
| AN11435 | ChrIII_A_nidulans_FGSC_A4:2317511-2318199  | WT_5hasex | WT_veg | OK     | 4,82765  | 4,91008 | 0,0244267     | -0,0165559    | 0,986791   | 0,995262   | no  |
| AN11436 | ChrIII_A_nidulans_FGSC_A4:2186284-2187531  | WT_5hasex | WT_veg | OK     | 13,8291  | 59,5384 | 2,10611       | -3,65537      | 0,00025681 | 0,00247375 | yes |
| AN11437 | ChrIII_A_nidulans_FGSC_A4:2107637-2108037  | WT_5hasex | WT_veg | OK     | 0,89943  | 4,19348 | 2,22106       | -1,14626      | 0,251686   | 0,52039    | no  |
| AN11438 | ChrIII_A_nidulans_FGSC_A4:2052955-2053271  | WT_5hasex | WT_veg | OK     | 4,34177  | 7,21668 | 0,733053      | -0,642389     | 0,520621   | 0,763954   | no  |
| AN11439 | ChrIII_A_nidulans_FGSC_A4:1856511-1856976  | WT_5hasex | WT_veg | OK     | 5,42217  | 9,17546 | 0,75891       | -0,89277      | 0,37198    | 0,646797   | no  |
| AN1144  | ChrVIII_A_nidulans_FGSC_A4:1393969-1396121 | WT_5hasex | WT_veg | OK     | 22,5457  | 12,0534 | -0,903411     | 1,67923       | 0,0931081  | 0,275373   | no  |
| AN11442 | ChrIII_A_nidulans_FGSC_A4:1750924-1751358  | WT_5hasex | WT_veg | NOTEST | 1,0947   | 1,05105 | -0,0587027    | 0,0179813     | 0,985654   | 1          | no  |

## Supplementary table 1

|         |                                            |           |        |        |          |         |               |               |            |            |     |
|---------|--------------------------------------------|-----------|--------|--------|----------|---------|---------------|---------------|------------|------------|-----|
| AN11444 | ChrIII_A_nidulans_FGSC_A4:1526771-1527444  | WT_5hasex | WT_veg | OK     | 679,861  | 991,942 | 0,545016      | -1,10261      | 0,270198   | 0,542279   | no  |
| AN11445 | ChrVIII_A_nidulans_FGSC_A4:1392030-1393888 | WT_5hasex | WT_veg | OK     | 4,70877  | 7,09144 | 0,590727      | -0,870142     | 0,384223   | 0,658019   | no  |
| AN11455 | ChrIII_A_nidulans_FGSC_A4:202828-203383    | WT_5hasex | WT_veg | OK     | 0        | 3,99893 | 1.79769e+308  | 1.79769e+308  | 0,123323   | 0,333265   | no  |
| AN11456 | ChrIII_A_nidulans_FGSC_A4:136962-137275    | WT_5hasex | WT_veg | OK     | 55,5803  | 163,073 | 1,55288       | -2,23667      | 0,0253082  | 0,106453   | no  |
| AN11457 | ChrIII_A_nidulans_FGSC_A4:121917-122446    | WT_5hasex | WT_veg | NOTEST | 0        | 0       | 0             | 0             | 1          | 1          | no  |
| AN11461 | ChrIII_A_nidulans_FGSC_A4:12330-12658      | WT_5hasex | WT_veg | OK     | 7,13674  | 52,8784 | 2,88934       | -3,35941      | 0,00078108 | 0,00636063 | yes |
| AN11462 | ChrV_A_nidulans_FGSC_A4:1134449-1135387    | WT_5hasex | WT_veg | NOTEST | 0        | 0       | 0             | 0             | 1          | 1          | no  |
| AN11467 | ChrV_A_nidulans_FGSC_A4:1399037-1399260    | WT_5hasex | WT_veg | NOTEST | 0        | 0       | 0             | 0             | 1          | 1          | no  |
| AN11468 | ChrV_A_nidulans_FGSC_A4:1400650-1400935    | WT_5hasex | WT_veg | OK     | 2,31209  | 12,6366 | 2,45034       | -1,6911       | 0,0908183  | 0,270621   | no  |
| AN1147  | ChrVIII_A_nidulans_FGSC_A4:1385879-1386968 | WT_5hasex | WT_veg | OK     | 30,0732  | 15,3519 | -0,970061     | 1,67615       | 0,0937083  | 0,276617   | no  |
| AN11471 | ChrV_A_nidulans_FGSC_A4:1559017-1559407    | WT_5hasex | WT_veg | OK     | 4,19007  | 0       | -1.79769e+308 | -1.79769e+308 | 0,122325   | 0,331849   | no  |
| AN11473 | ChrV_A_nidulans_FGSC_A4:3320758-3321725    | WT_5hasex | WT_veg | NOTEST | 0        | 0       | 0             | 0             | 1          | 1          | no  |
| AN11475 | ChrV_A_nidulans_FGSC_A4:3184501-3185124    | WT_5hasex | WT_veg | OK     | 3,09133  | 6,86543 | 1,15112       | -0,675124     | 0,499597   | 0,74936    | no  |
| AN11476 | ChrV_A_nidulans_FGSC_A4:3055150-3055442    | WT_5hasex | WT_veg | OK     | 52,664   | 7,91626 | -2,73393      | 1,9631        | 0,0496349  | 0,176684   | no  |
| AN11477 | ChrV_A_nidulans_FGSC_A4:2976196-2976863    | WT_5hasex | WT_veg | OK     | 31,0187  | 4,87788 | -2,66881      | 3,26578       | 0,00109162 | 0,00844203 | yes |
| AN1148  | ChrVIII_A_nidulans_FGSC_A4:1380938-1383168 | WT_5hasex | WT_veg | OK     | 318,096  | 434,317 | 0,449287      | -0,714683     | 0,474805   | 0,731437   | no  |
| AN11480 | ChrV_A_nidulans_FGSC_A4:2729319-2730061    | WT_5hasex | WT_veg | NOTEST | 0        | 0       | 0             | 0             | 1          | 1          | no  |
| AN11481 | ChrV_A_nidulans_FGSC_A4:2680313-2680506    | WT_5hasex | WT_veg | NOTEST | 0        | 0       | 0             | 0             | 1          | 1          | no  |
| AN11487 | ChrV_A_nidulans_FGSC_A4:2122090-2122918    | WT_5hasex | WT_veg | OK     | 303,37   | 245,792 | -0,30364      | 0,620239      | 0,5351     | 0,77275    | no  |
| AN11489 | ChrV_A_nidulans_FGSC_A4:1957539-1958019    | WT_5hasex | WT_veg | OK     | 9235,95  | 9788,63 | 0,0838467     | -0,143381     | 0,885989   | 0,956595   | no  |
| AN1149  | ChrVIII_A_nidulans_FGSC_A4:1379245-1379718 | WT_5hasex | WT_veg | OK     | 109,722  | 140,982 | 0,361663      | -0,690902     | 0,489627   | 0,742381   | no  |
| AN11491 | ChrI_A_nidulans_FGSC_A4:2090364-2091389    | WT_5hasex | WT_veg | NOTEST | 0        | 0       | 0             | 0             | 1          | 1          | no  |
| AN11492 | ChrI_A_nidulans_FGSC_A4:1920923-1921461    | WT_5hasex | WT_veg | NOTEST | 0        | 0       | 0             | 0             | 1          | 1          | no  |
| AN11495 | ChrI_A_nidulans_FGSC_A4:1731890-1732192    | WT_5hasex | WT_veg | OK     | 21,3362  | 44,5875 | 1,06334       | -1,43835      | 0,150334   | 0,379487   | no  |
| AN11499 | ChrI_A_nidulans_FGSC_A4:1291611-1292219    | WT_5hasex | WT_veg | OK     | 703,131  | 1121,69 | 0,673812      | -1,31866      | 0,187284   | 0,436769   | no  |
| AN1150  | ChrVIII_A_nidulans_FGSC_A4:1377491-1379122 | WT_5hasex | WT_veg | OK     | 31,8043  | 39,5616 | 0,314877      | -0,617889     | 0,536648   | 0,773417   | no  |
| AN11500 | ChrI_A_nidulans_FGSC_A4:1189811-1190550    | WT_5hasex | WT_veg | OK     | 29,884   | 40,5771 | 0,441292      | -0,768728     | 0,442055   | 0,706043   | no  |
| AN11504 | ChrI_A_nidulans_FGSC_A4:870995-871519      | WT_5hasex | WT_veg | OK     | 78,6259  | 94,2744 | 0,261862      | -0,454954     | 0,649142   | 0,841068   | no  |
| AN11507 | ChrI_A_nidulans_FGSC_A4:574551-574675      | WT_5hasex | WT_veg | NOTEST | 0        | 0       | 0             | 0             | 1          | 1          | no  |
| AN1151  | ChrVIII_A_nidulans_FGSC_A4:1373456-1374787 | WT_5hasex | WT_veg | OK     | 11,6709  | 16,4593 | 0,495988      | -0,813716     | 0,415808   | 0,684766   | no  |
| AN11510 | ChrI_A_nidulans_FGSC_A4:92757-93073        | WT_5hasex | WT_veg | OK     | 13,4015  | 0       | -1.79769e+308 | -1.79769e+308 | 0,0524774  | 0,18352    | no  |
| AN11511 | ChrI_A_nidulans_FGSC_A4:89765-90028        | WT_5hasex | WT_veg | OK     | 2,73944  | 5,54138 | 1,01637       | -0,596091     | 0,551114   | 0,782833   | no  |
| AN11518 | ChrI_A_nidulans_FGSC_A4:23834-24147        | WT_5hasex | WT_veg | NOTEST | 0        | 0       | 0             | 0             | 1          | 1          | no  |
| AN1152  | ChrVIII_A_nidulans_FGSC_A4:1371167-1372185 | WT_5hasex | WT_veg | OK     | 318,444  | 602,647 | 0,920273      | -1,82154      | 0,0685254  | 0,22214    | no  |
| AN11523 | ChrI_A_nidulans_FGSC_A4:2724842-2725867    | WT_5hasex | WT_veg | OK     | 0        | 10,9267 | 1.79769e+308  | 1.79769e+308  | 0,123323   | 0,333265   | no  |
| AN11527 | ChrI_A_nidulans_FGSC_A4:3162228-3162567    | WT_5hasex | WT_veg | NOTEST | 0,831973 | 0       | -1.79769e+308 | -1.79769e+308 | 0,165569   | 1          | no  |
| AN1153  | ChrVIII_A_nidulans_FGSC_A4:1368427-1369264 | WT_5hasex | WT_veg | NOTEST | 1,19504  | 0       | -1.79769e+308 | -1.79769e+308 | 0,0341325  | 1          | no  |
| AN11533 | ChrI_A_nidulans_FGSC_A4:3502077-3502536    | WT_5hasex | WT_veg | NOTEST | 0        | 0       | 0             | 0             | 1          | 1          | no  |
| AN1154  | ChrVIII_A_nidulans_FGSC_A4:1366221-1367072 | WT_5hasex | WT_veg | OK     | 136,628  | 185,365 | 0,440108      | -0,898569     | 0,368882   | 0,643626   | no  |
| AN11541 | ChrIV_A_nidulans_FGSC_A4:1273071-1273766   | WT_5hasex | WT_veg | OK     | 22,181   | 14,0415 | -0,659625     | 0,744972      | 0,456289   | 0,717293   | no  |
| AN11543 | ChrIV_A_nidulans_FGSC_A4:1215730-1216459   | WT_5hasex | WT_veg | OK     | 598,227  | 1010,03 | 0,755634      | -1,50595      | 0,132081   | 0,348979   | no  |
| AN11544 | ChrIV_A_nidulans_FGSC_A4:949779-950043     | WT_5hasex | WT_veg | NOTEST | 0        | 0       | 0             | 0             | 1          | 1          | no  |
| AN11550 | ChrIV_A_nidulans_FGSC_A4:645881-646257     | WT_5hasex | WT_veg | NOTEST | 0        | 0       | 0             | 0             | 1          | 1          | no  |
| AN11551 | ChrIV_A_nidulans_FGSC_A4:640182-640512     | WT_5hasex | WT_veg | OK     | 3,2233   | 14,0415 | 2,12309       | -2,15677      | 0,0310232  | 0,124621   | no  |
| AN11552 | ChrIV_A_nidulans_FGSC_A4:432979-433379     | WT_5hasex | WT_veg | NOTEST | 0        | 0       | 0             | 0             | 1          | 1          | no  |
| AN1156  | ChrVIII_A_nidulans_FGSC_A4:1354893-1362654 | WT_5hasex | WT_veg | OK     | 11,781   | 22,3948 | 0,926695      | -1,87828      | 0,0603427  | 0,203114   | no  |
| AN11563 | ChrIV_A_nidulans_FGSC_A4:1591269-1591509   | WT_5hasex | WT_veg | OK     | 12,5739  | 19,3087 | 0,618818      | -0,658687     | 0,510097   | 0,756096   | no  |
| AN11565 | ChrIV_A_nidulans_FGSC_A4:1724786-1725599   | WT_5hasex | WT_veg | OK     | 683,146  | 890,398 | 0,382258      | -0,75404      | 0,450825   | 0,712849   | no  |
| AN11568 | ChrIV_A_nidulans_FGSC_A4:1859669-1859986   | WT_5hasex | WT_veg | OK     | 121,137  | 186,228 | 0,620428      | -1,09643      | 0,272889   | 0,545506   | no  |
| AN11570 | ChrIV_A_nidulans_FGSC_A4:2250614-2250859   | WT_5hasex | WT_veg | OK     | 1,80864  | 8,43253 | 2,22106       | -1,14626      | 0,251686   | 0,52039    | no  |
| AN11574 | ChrIV_A_nidulans_FGSC_A4:2841664-2842051   | WT_5hasex | WT_veg | NOTEST | 0        | 0       | 0             | 0             | 1          | 1          | no  |
| AN11575 | ChrIV_A_nidulans_FGSC_A4:2842721-2843035   | WT_5hasex | WT_veg | NOTEST | 0        | 0       | 0             | 0             | 1          | 1          | no  |
| AN11577 | ChrIV_A_nidulans_FGSC_A4:2879605-2879851   | WT_5hasex | WT_veg | NOTEST | 0        | 0       | 0             | 0             | 1          | 1          | no  |



## Supplementary table 1

|         |                                            |           |        |        |          |         |               |               |            |            |     |
|---------|--------------------------------------------|-----------|--------|--------|----------|---------|---------------|---------------|------------|------------|-----|
| AN1158  | ChrVIII_A_nidulans_FGSC_A4:1344348-1349070 | WT_5hasex | WT_veg | OK     | 66,7083  | 96,742  | 0,536276      | -1,05057      | 0,293455   | 0,568237   | no  |
| AN11581 | ChrII_A_nidulans_FGSC_A4:73094-73238       | WT_5hasex | WT_veg | OK     | 21,8691  | 89,7769 | 2,03745       | -2,24738      | 0,0246156  | 0,104125   | no  |
| AN11582 | ChrII_A_nidulans_FGSC_A4:80958-81538       | WT_5hasex | WT_veg | OK     | 77,5552  | 86,5781 | 0,158779      | -0,275011     | 0,783308   | 0,911645   | no  |
| AN11584 | ChrII_A_nidulans_FGSC_A4:175276-175666     | WT_5hasex | WT_veg | OK     | 9,58017  | 3,37301 | -1,50601      | 1,04221       | 0,297314   | 0,572557   | no  |
| AN11585 | ChrII_A_nidulans_FGSC_A4:362647-363664     | WT_5hasex | WT_veg | NOTEST | 0        | 0       | 0             | 0             | 1          | 1          | no  |
| AN11586 | ChrII_A_nidulans_FGSC_A4:384638-385057     | WT_5hasex | WT_veg | NOTEST | 0        | 0       | 0             | 0             | 1          | 1          | no  |
| AN1159  | ChrVIII_A_nidulans_FGSC_A4:1342140-1343909 | WT_5hasex | WT_veg | OK     | 10,6303  | 23,0889 | 1,11901       | -1,90416      | 0,0568898  | 0,194555   | no  |
| AN11590 | ChrII_A_nidulans_FGSC_A4:939564-939707     | WT_5hasex | WT_veg | NOTEST | 0        | 0       | 0             | 0             | 1          | 1          | no  |
| AN11595 | ChrII_A_nidulans_FGSC_A4:1027660-1027943   | WT_5hasex | WT_veg | NOTEST | 0        | 0       | 0             | 0             | 1          | 1          | no  |
| AN11597 | ChrII_A_nidulans_FGSC_A4:1113732-1114472   | WT_5hasex | WT_veg | OK     | 635,278  | 851,177 | 0,422071      | -0,812041     | 0,416768   | 0,685741   | no  |
| AN1160  | ChrVIII_A_nidulans_FGSC_A4:1341155-1341948 | WT_5hasex | WT_veg | OK     | 2853,74  | 2613,45 | -0,126898     | 0,193846      | 0,846297   | 0,93933    | no  |
| AN11600 | ChrV_A_nidulans_FGSC_A4:28443-28843        | WT_5hasex | WT_veg | NOTEST | 0        | 0       | 0             | 0             | 1          | 1          | no  |
| AN11605 | ChrV_A_nidulans_FGSC_A4:282313-282832      | WT_5hasex | WT_veg | NOTEST | 0,857704 | 0       | -1.79769e+308 | -1.79769e+308 | 0,165569   | 1          | no  |
| AN11609 | ChrV_A_nidulans_FGSC_A4:427276-427790      | WT_5hasex | WT_veg | OK     | 571,283  | 1024,06 | 0,842019      | -1,62957      | 0,103192   | 0,29612    | no  |
| AN1161  | ChrVIII_A_nidulans_FGSC_A4:1338557-1339178 | WT_5hasex | WT_veg | OK     | 142,518  | 294,998 | 1,04956       | -2,10383      | 0,0353934  | 0,1377     | no  |
| AN11611 | ChrV_A_nidulans_FGSC_A4:434118-434593      | WT_5hasex | WT_veg | NOTEST | 0        | 0       | 0             | 0             | 1          | 1          | no  |
| AN11616 | ChrV_A_nidulans_FGSC_A4:667105-668018      | WT_5hasex | WT_veg | NOTEST | 0        | 0       | 0             | 0             | 1          | 1          | no  |
| AN11619 | ChrV_A_nidulans_FGSC_A4:801191-801281      | WT_5hasex | WT_veg | NOTEST | 0        | 0       | 0             | 0             | 1          | 1          | no  |
| AN1162  | ChrVIII_A_nidulans_FGSC_A4:1336833-1338101 | WT_5hasex | WT_veg | OK     | 966,127  | 2635,06 | 1,44755       | -2,5471       | 0,0108621  | 0,0556065  | no  |
| AN11621 | ChrV_A_nidulans_FGSC_A4:832665-833164      | WT_5hasex | WT_veg | OK     | 0        | 7,21668 | 1.79769e+308  | 1.79769e+308  | 0,036343   | 0,140531   | no  |
| AN11622 | ChrV_A_nidulans_FGSC_A4:911036-911753      | WT_5hasex | WT_veg | NOTEST | 0        | 0       | 0             | 0             | 1          | 1          | no  |
| AN11623 | ChrV_A_nidulans_FGSC_A4:914893-915250      | WT_5hasex | WT_veg | OK     | 4,94244  | 8,52753 | 0,786905      | -0,729736     | 0,465552   | 0,724471   | no  |
| AN11624 | ChrIII_A_nidulans_FGSC_A4:3384124-3384478  | WT_5hasex | WT_veg | OK     | 17,91    | 0       | -1.79769e+308 | -1.79769e+308 | 0,0220724  | 0,0959983  | no  |
| AN11626 | ChrIII_A_nidulans_FGSC_A4:3267634-3267931  | WT_5hasex | WT_veg | NOTEST | 0        | 0       | 0             | 0             | 1          | 1          | no  |
| AN1163  | ChrVIII_A_nidulans_FGSC_A4:1333826-1336505 | WT_5hasex | WT_veg | OK     | 133,879  | 325,108 | 1,27999       | -2,16262      | 0,0305705  | 0,123114   | no  |
| AN11630 | ChrIII_A_nidulans_FGSC_A4:2952184-2952534  | WT_5hasex | WT_veg | OK     | 14,3469  | 23,8132 | 0,731026      | -0,949596     | 0,342318   | 0,61784    | no  |
| AN11631 | ChrIII_A_nidulans_FGSC_A4:2740893-2741268  | WT_5hasex | WT_veg | OK     | 82,4447  | 185,723 | 1,17166       | -2,09325      | 0,0363267  | 0,140531   | no  |
| AN11632 | ChrIII_A_nidulans_FGSC_A4:2575555-2576078  | WT_5hasex | WT_veg | OK     | 2,69418  | 6,81529 | 1,33893       | -1,0651       | 0,286831   | 0,561092   | no  |
| AN11633 | ChrVII_A_nidulans_FGSC_A4:565758-566378    | WT_5hasex | WT_veg | NOTEST | 0        | 0       | 0             | 0             | 1          | 1          | no  |
| AN1164  | ChrVIII_A_nidulans_FGSC_A4:1330956-1332988 | WT_5hasex | WT_veg | OK     | 19,0115  | 119,413 | 2,65102       | -5,23834      | 1,6202E-07 | 3,5915E-06 | yes |
| AN11641 | ChrVI_A_nidulans_FGSC_A4:334435-335330     | WT_5hasex | WT_veg | OK     | 8,62783  | 81,0408 | 3,23158       | -2,8001       | 0,00510861 | 0,0302522  | yes |
| AN11647 | ChrVIII_A_nidulans_FGSC_A4:79615-80162     | WT_5hasex | WT_veg | NOTEST | 1,59673  | 3,48671 | 1,12674       | -0,943695     | 0,345325   | 1          | no  |
| AN1165  | ChrVIII_A_nidulans_FGSC_A4:1329361-1330711 | WT_5hasex | WT_veg | OK     | 23,9926  | 47,4472 | 0,983734      | -1,85714      | 0,0632912  | 0,209831   | no  |
| AN1166  | ChrVIII_A_nidulans_FGSC_A4:1326198-1327732 | WT_5hasex | WT_veg | OK     | 946,849  | 1301,77 | 0,459272      | -0,773685     | 0,439117   | 0,703547   | no  |
| AN1167  | ChrVIII_A_nidulans_FGSC_A4:1324325-1325943 | WT_5hasex | WT_veg | OK     | 104,626  | 153,904 | 0,556788      | -1,14848      | 0,25077    | 0,519381   | no  |
| AN11670 | ChrV_A_nidulans_FGSC_A4:713522-713837      | WT_5hasex | WT_veg | NOTEST | 0        | 0       | 0             | 0             | 1          | 1          | no  |
| AN11673 | ChrVII_A_nidulans_FGSC_A4:8896-9103        | WT_5hasex | WT_veg | NOTEST | 0        | 0       | 0             | 0             | 1          | 1          | no  |
| AN11679 | ChrVI_A_nidulans_FGSC_A4:2684648-2685964   | WT_5hasex | WT_veg | OK     | 11,7184  | 28,526  | 1,2835        | -2,16806      | 0,0301541  | 0,12179    | no  |
| AN1168  | ChrVIII_A_nidulans_FGSC_A4:1317326-1323805 | WT_5hasex | WT_veg | OK     | 13,7402  | 27,1108 | 0,980462      | -2,0164       | 0,0437587  | 0,161107   | no  |
| AN11681 | ChrVI_A_nidulans_FGSC_A4:2665364-2668923   | WT_5hasex | WT_veg | NOTEST | 0        | 0       | 0             | 0             | 1          | 1          | no  |
| AN11684 | ChrVI_A_nidulans_FGSC_A4:2535773-2537648   | WT_5hasex | WT_veg | OK     | 22,3477  | 52,3436 | 1,22789       | -2,44189      | 0,0146106  | 0,0700928  | no  |
| AN11685 | ChrVI_A_nidulans_FGSC_A4:2510891-2511309   | WT_5hasex | WT_veg | OK     | 187,71   | 134,388 | -0,482102     | 0,936756      | 0,348884   | 0,624649   | no  |
| AN11686 | ChrVI_A_nidulans_FGSC_A4:2503001-2503319   | WT_5hasex | WT_veg | OK     | 2,577    | 2,28646 | -0,172574     | 0,101812      | 0,918906   | 0,969078   | no  |
| AN11687 | ChrVI_A_nidulans_FGSC_A4:2480602-2481457   | WT_5hasex | WT_veg | OK     | 74,9738  | 99,2478 | 0,404649      | -0,792825     | 0,42788    | 0,694547   | no  |
| AN11688 | ChrVI_A_nidulans_FGSC_A4:2452483-2453145   | WT_5hasex | WT_veg | OK     | 68,5342  | 77,7418 | 0,181866      | -0,329161     | 0,742034   | 0,891531   | no  |
| AN11689 | ChrVI_A_nidulans_FGSC_A4:2432559-2433806   | WT_5hasex | WT_veg | OK     | 9,40387  | 2,49451 | -1,9145       | 1,32843       | 0,184038   | 0,432231   | no  |
| AN1169  | ChrVIII_A_nidulans_FGSC_A4:1315567-1316266 | WT_5hasex | WT_veg | OK     | 6,99115  | 9,43506 | 0,432503      | -0,521276     | 0,602174   | 0,814443   | no  |
| AN11690 | ChrVI_A_nidulans_FGSC_A4:2407531-2408478   | WT_5hasex | WT_veg | NOTEST | 0        | 0       | 0             | 0             | 1          | 1          | no  |
| AN11691 | ChrVI_A_nidulans_FGSC_A4:2370869-2371577   | WT_5hasex | WT_veg | OK     | 42,305   | 104,724 | 1,30769       | -2,46522      | 0,0136931  | 0,0666244  | no  |
| AN11692 | ChrVI_A_nidulans_FGSC_A4:2218996-2219659   | WT_5hasex | WT_veg | OK     | 4,89248  | 5,70258 | 0,221048      | -0,230268     | 0,817883   | 0,927067   | no  |
| AN11693 | ChrVI_A_nidulans_FGSC_A4:2216951-2217272   | WT_5hasex | WT_veg | OK     | 116,786  | 159,76  | 0,452044      | -0,873643     | 0,382313   | 0,656356   | no  |
| AN11694 | ChrVI_A_nidulans_FGSC_A4:2215179-2216452   | WT_5hasex | WT_veg | OK     | 70,0001  | 111,088 | 0,666272      | -1,36223      | 0,173126   | 0,415943   | no  |
| AN11695 | ChrVI_A_nidulans_FGSC_A4:2191185-2191889   | WT_5hasex | WT_veg | OK     | 4,90288  | 11,6295 | 1,24609       | -1,56244      | 0,118185   | 0,324365   | no  |

# Supplementary table 1

|         |                                            |           |        |        |          |          |               |               |            |            |     |
|---------|--------------------------------------------|-----------|--------|--------|----------|----------|---------------|---------------|------------|------------|-----|
| AN11696 | ChrVI_A_nidulans_FGSC_A4:2097481-2098228   | WT_5hasex | WT_veg | OK     | 3,75649  | 10,1749  | 1,43755       | -1,86444      | 0,0622598  | 0,207382   | no  |
| AN11697 | ChrVI_A_nidulans_FGSC_A4:2087833-2089303   | WT_5hasex | WT_veg | OK     | 72,9524  | 68,4577  | -0,0917419    | 0,175162      | 0,860952   | 0,946257   | no  |
| AN11698 | ChrVI_A_nidulans_FGSC_A4:2084675-2086499   | WT_5hasex | WT_veg | OK     | 4,98407  | 6,52669  | 0,389026      | -0,587098     | 0,557138   | 0,786935   | no  |
| AN11699 | ChrVI_A_nidulans_FGSC_A4:2049944-2050601   | WT_5hasex | WT_veg | OK     | 29,7953  | 148,727  | 2,31951       | -3,92439      | 8,6949E-05 | 0,0009717  | yes |
| AN11700 | ChrVI_A_nidulans_FGSC_A4:2006543-2006914   | WT_5hasex | WT_veg | OK     | 15,0507  | 8,67487  | -0,794917     | 0,869373      | 0,384643   | 0,658459   | no  |
| AN11701 | ChrVI_A_nidulans_FGSC_A4:2002195-2002734   | WT_5hasex | WT_veg | NOTEST | 0        | 0        | 0             | 0             | 1          | 1          | no  |
| AN11702 | ChrVI_A_nidulans_FGSC_A4:1999802-2000736   | WT_5hasex | WT_veg | OK     | 283,344  | 30,6702  | -3,20765      | 5,96721       | 2,4135E-09 | 7,8701E-08 | yes |
| AN11703 | ChrVI_A_nidulans_FGSC_A4:1997455-1998241   | WT_5hasex | WT_veg | OK     | 1,88701  | 1,25736  | -0,585702     | 0,400765      | 0,688593   | 0,862979   | no  |
| AN11704 | ChrVI_A_nidulans_FGSC_A4:1977238-1978206   | WT_5hasex | WT_veg | OK     | 62,4759  | 180,628  | 1,53165       | -3,06406      | 0,00218355 | 0,0150397  | yes |
| AN11705 | ChrVI_A_nidulans_FGSC_A4:1885028-1885877   | WT_5hasex | WT_veg | OK     | 4492,04  | 23171,7  | 2,36692       | -2,79427      | 0,00520163 | 0,0307024  | yes |
| AN11706 | ChrVI_A_nidulans_FGSC_A4:1858737-1861409   | WT_5hasex | WT_veg | OK     | 30,4467  | 43,1803  | 0,50409       | -1,03883      | 0,298884   | 0,574198   | no  |
| AN11707 | ChrVI_A_nidulans_FGSC_A4:1856107-1857670   | WT_5hasex | WT_veg | OK     | 4,38001  | 5,15651  | 0,235461      | -0,336072     | 0,736817   | 0,88938    | no  |
| AN11708 | ChrVI_A_nidulans_FGSC_A4:1656377-1657499   | WT_5hasex | WT_veg | OK     | 3,27101  | 9,58216  | 1,55062       | -1,7352       | 0,0827057  | 0,253729   | no  |
| AN11709 | ChrVI_A_nidulans_FGSC_A4:1595670-1598568   | WT_5hasex | WT_veg | OK     | 11,6888  | 20,3835  | 0,802279      | -1,25828      | 0,208289   | 0,465742   | no  |
| AN1171  | ChrVIII_A_nidulans_FGSC_A4:1308283-1311590 | WT_5hasex | WT_veg | OK     | 22,7158  | 28,8762  | 0,346183      | -0,71101      | 0,477078   | 0,732908   | no  |
| AN11710 | ChrII_A_nidulans_FGSC_A4:3768358-3768903   | WT_5hasex | WT_veg | NOTEST | 0        | 0        | 0             | 0             | 1          | 1          | no  |
| AN11711 | ChrII_A_nidulans_FGSC_A4:3761971-3762370   | WT_5hasex | WT_veg | OK     | 4,16604  | 0        | -1.79769e+308 | -1.79769e+308 | 0,061245   | 0,20511    | no  |
| AN11712 | ChrII_A_nidulans_FGSC_A4:3735979-3736884   | WT_5hasex | WT_veg | OK     | 7,25432  | 6,79025  | -0,0953763    | 0,128197      | 0,897993   | 0,960928   | no  |
| AN11713 | ChrII_A_nidulans_FGSC_A4:3734286-3735842   | WT_5hasex | WT_veg | OK     | 12,0901  | 22,7843  | 0,914217      | -1,56488      | 0,11761    | 0,323214   | no  |
| AN11714 | ChrII_A_nidulans_FGSC_A4:3699849-3700421   | WT_5hasex | WT_veg | OK     | 7,70019  | 31,396   | 2,02762       | -2,79141      | 0,00524791 | 0,0309253  | yes |
| AN11715 | ChrII_A_nidulans_FGSC_A4:3678173-3678679   | WT_5hasex | WT_veg | OK     | 32,4152  | 54,1466  | 0,7402        | -1,08703      | 0,277023   | 0,550286   | no  |
| AN11716 | ChrII_A_nidulans_FGSC_A4:3651524-3651810   | WT_5hasex | WT_veg | OK     | 13,6562  | 31,8196  | 1,22036       | -1,55609      | 0,119687   | 0,327203   | no  |
| AN11717 | ChrII_A_nidulans_FGSC_A4:3648594-3649517   | WT_5hasex | WT_veg | NOTEST | 1,07351  | 0        | -1.79769e+308 | -1.79769e+308 | 0,165569   | 1          | no  |
| AN11718 | ChrII_A_nidulans_FGSC_A4:3545210-3545988   | WT_5hasex | WT_veg | OK     | 71,7898  | 112,255  | 0,644933      | -1,28759      | 0,197888   | 0,451644   | no  |
| AN11719 | ChrII_A_nidulans_FGSC_A4:3527981-3529720   | WT_5hasex | WT_veg | NOTEST | 0        | 0        | 0             | 0             | 1          | 1          | no  |
| AN1172  | ChrVIII_A_nidulans_FGSC_A4:1304967-1307231 | WT_5hasex | WT_veg | OK     | 44,8514  | 60,7142  | 0,436881      | -0,875672     | 0,381208   | 0,655512   | no  |
| AN11720 | ChrII_A_nidulans_FGSC_A4:3495781-3496587   | WT_5hasex | WT_veg | OK     | 9,13115  | 30,122   | 1,72195       | -2,5407       | 0,0110632  | 0,0564165  | no  |
| AN11721 | ChrII_A_nidulans_FGSC_A4:3478446-3483603   | WT_5hasex | WT_veg | OK     | 7,37602  | 11,3571  | 0,622685      | -1,1977       | 0,231033   | 0,495181   | no  |
| AN11722 | ChrII_A_nidulans_FGSC_A4:3464830-3465529   | WT_5hasex | WT_veg | OK     | 12,0325  | 38,4472  | 1,67595       | -2,5486       | 0,0108156  | 0,0554289  | no  |
| AN11723 | ChrII_A_nidulans_FGSC_A4:3415398-3415755   | WT_5hasex | WT_veg | OK     | 3,59918  | 0,509646 | -2,8201       | 0,937069      | 0,348723   | 0,62451    | no  |
| AN11724 | ChrII_A_nidulans_FGSC_A4:3405001-3407450   | WT_5hasex | WT_veg | NOTEST | 0        | 0        | 0             | 0             | 1          | 1          | no  |
| AN11725 | ChrII_A_nidulans_FGSC_A4:3342187-3343794   | WT_5hasex | WT_veg | NOTEST | 1,64882  | 0,753322 | -1,1301       | 0,406885      | 0,684093   | 1          | no  |
| AN11728 | ChrII_A_nidulans_FGSC_A4:3333468-3334329   | WT_5hasex | WT_veg | OK     | 116,594  | 299,64   | 1,36174       | -2,802        | 0,00507864 | 0,0301121  | yes |
| AN11729 | ChrII_A_nidulans_FGSC_A4:3268177-3269988   | WT_5hasex | WT_veg | OK     | 31,2478  | 141,614  | 2,18014       | -4,50572      | 6,6148E-06 | 9,9406E-05 | yes |
| AN1173  | ChrVIII_A_nidulans_FGSC_A4:1303349-1304561 | WT_5hasex | WT_veg | OK     | 30,6595  | 51,5399  | 0,749353      | -1,44009      | 0,149843   | 0,37865    | no  |
| AN11730 | ChrII_A_nidulans_FGSC_A4:3267103-3267852   | WT_5hasex | WT_veg | OK     | 59,1772  | 113,037  | 0,93368       | -1,79878      | 0,072053   | 0,230171   | no  |
| AN11731 | ChrII_A_nidulans_FGSC_A4:3169800-3170393   | WT_5hasex | WT_veg | OK     | 1,82866  | 8,52817  | 2,22145       | -2,22091      | 0,0263571  | 0,109852   | no  |
| AN11732 | ChrII_A_nidulans_FGSC_A4:3169136-3169704   | WT_5hasex | WT_veg | OK     | 2,62426  | 7,63835  | 1,54135       | -1,65183      | 0,0985684  | 0,286382   | no  |
| AN11733 | ChrII_A_nidulans_FGSC_A4:2996898-2998229   | WT_5hasex | WT_veg | OK     | 1,2156   | 4,24152  | 1,80291       | -1,26043      | 0,207515   | 0,464749   | no  |
| AN11735 | ChrVIII_A_nidulans_FGSC_A4:3526618-3527633 | WT_5hasex | WT_veg | OK     | 2,09316  | 4,00582  | 0,936416      | -0,912299     | 0,361611   | 0,636234   | no  |
| AN11738 | ChrVIII_A_nidulans_FGSC_A4:3436210-3437110 | WT_5hasex | WT_veg | NOTEST | 0        | 0        | 0             | 0             | 1          | 1          | no  |
| AN11739 | ChrVIII_A_nidulans_FGSC_A4:3315533-3318341 | WT_5hasex | WT_veg | NOTEST | 0,185369 | 0,675778 | 1,86615       | -0,820888     | 0,41171    | 1          | no  |
| AN1174  | ChrVIII_A_nidulans_FGSC_A4:1297676-1302953 | WT_5hasex | WT_veg | NOTEST | 1,8025   | 2,44782  | 0,441496      | -0,625958     | 0,531342   | 1          | no  |
| AN11742 | ChrVIII_A_nidulans_FGSC_A4:3293579-3294591 | WT_5hasex | WT_veg | NOTEST | 0        | 0        | 0             | 0             | 1          | 1          | no  |
| AN11745 | ChrIV_A_nidulans_FGSC_A4:1586467-1588507   | WT_5hasex | WT_veg | NOTEST | 0,650776 | 0,335928 | -0,954007     | 0,189785      | 0,849478   | 1          | no  |
| AN11746 | ChrIV_A_nidulans_FGSC_A4:1644545-1645781   | WT_5hasex | WT_veg | OK     | 19,696   | 29,6568  | 0,590461      | -1,07196      | 0,283737   | 0,557495   | no  |
| AN11747 | ChrIV_A_nidulans_FGSC_A4:1646371-1647774   | WT_5hasex | WT_veg | OK     | 12,2728  | 30,9672  | 1,33528       | -2,2391       | 0,0251496  | 0,105931   | no  |
| AN11748 | ChrIV_A_nidulans_FGSC_A4:1682101-1682515   | WT_5hasex | WT_veg | OK     | 21,0663  | 18,9262  | -0,154548     | 0,216694      | 0,828447   | 0,931654   | no  |
| AN11749 | ChrIV_A_nidulans_FGSC_A4:1688014-1689225   | WT_5hasex | WT_veg | OK     | 3,61856  | 14,6896  | 2,0213        | -2,77509      | 0,00551858 | 0,0322165  | yes |
| AN1175  | ChrVIII_A_nidulans_FGSC_A4:1294546-1295736 | WT_5hasex | WT_veg | OK     | 18,9086  | 85,9703  | 2,1848        | -3,87384      | 0,00010714 | 0,00116535 | yes |
| AN11750 | ChrIV_A_nidulans_FGSC_A4:1800934-1801204   | WT_5hasex | WT_veg | OK     | 0        | 8,52487  | 1.79769e+308  | 1.79769e+308  | 0,0214879  | 0,0941005  | no  |
| AN11751 | ChrIV_A_nidulans_FGSC_A4:1822501-1824057   | WT_5hasex | WT_veg | OK     | 3,76721  | 10,8517  | 1,52635       | -1,65542      | 0,0978402  | 0,28485    | no  |
| AN11752 | ChrIV_A_nidulans_FGSC_A4:1829263-1830664   | WT_5hasex | WT_veg | NOTEST | 0        | 0        | 0             | 0             | 1          | 1          | no  |

## Supplementary table 1

|         |                                            |           |        |        |          |          |               |               |            |            |      |
|---------|--------------------------------------------|-----------|--------|--------|----------|----------|---------------|---------------|------------|------------|------|
| AN11753 | ChrIV_A_nidulans_FGSC_A4:1889046-1889684   | WT_5hasex | WT_veg | OK     | 13,7775  | 47,0791  | 1,77277       | -2,64083      | 0,00827028 | 0,0447798  | yes  |
| AN11754 | ChrIV_A_nidulans_FGSC_A4:1937404-1938171   | WT_5hasex | WT_veg | OK     | 21,2274  | 10,7818  | -0,977323     | 1,50933       | 0,131215   | 0,347268   | no   |
| AN11755 | ChrIV_A_nidulans_FGSC_A4:1955141-1955789   | WT_5hasex | WT_veg | OK     | 21,1759  | 25,4887  | 0,267436      | -0,438321     | 0,661154   | 0,847907   | no   |
| AN11756 | ChrIV_A_nidulans_FGSC_A4:2000449-2000949   | WT_5hasex | WT_veg | NOTEST | 1,08569  | 3,61794  | 1,73656       | -1,12819      | 0,259239   |            | 1 no |
| AN11757 | ChrIV_A_nidulans_FGSC_A4:2033461-2034070   | WT_5hasex | WT_veg | OK     | 71,3924  | 172,055  | 1,26903       | -2,24912      | 0,0245048  | 0,103741   | no   |
| AN11758 | ChrIV_A_nidulans_FGSC_A4:2048036-2049791   | WT_5hasex | WT_veg | OK     | 4,2229   | 7,87633  | 0,899291      | -1,21229      | 0,225402   | 0,487817   | no   |
| AN1176  | ChrVIII_A_nidulans_FGSC_A4:1292298-1294125 | WT_5hasex | WT_veg | OK     | 17,6573  | 35,9421  | 1,02541       | -1,95218      | 0,0509164  | 0,179974   | no   |
| AN11762 | ChrIV_A_nidulans_FGSC_A4:2109647-2110283   | WT_5hasex | WT_veg | OK     | 0,920184 | 6,81716  | 2,88918       | -2,75351      | 0,00589594 | 0,0339916  | yes  |
| AN11764 | ChrIV_A_nidulans_FGSC_A4:2122324-2123166   | WT_5hasex | WT_veg | OK     | 10,3382  | 13,0177  | 0,332486      | -0,487778     | 0,625707   | 0,827778   | no   |
| AN11765 | ChrIII_A_nidulans_FGSC_A4:762584-763157    | WT_5hasex | WT_veg | OK     | 20,6137  | 56,0558  | 1,44326       | -2,34431      | 0,0190626  | 0,0858249  | no   |
| AN11766 | ChrIII_A_nidulans_FGSC_A4:742249-742726    | WT_5hasex | WT_veg | OK     | 32,1795  | 331,597  | 3,36522       | -5,74894      | 8,9803E-09 | 2,6261E-07 | yes  |
| AN11767 | ChrIII_A_nidulans_FGSC_A4:719711-720066    | WT_5hasex | WT_veg | OK     | 2,45693  | 5,04182  | 1,03709       | -0,791992     | 0,428365   | 0,694874   | no   |
| AN11768 | ChrIII_A_nidulans_FGSC_A4:551782-552328    | WT_5hasex | WT_veg | OK     | 8,98753  | 14,2431  | 0,664272      | -0,860406     | 0,389565   | 0,662967   | no   |
| AN11769 | ChrIII_A_nidulans_FGSC_A4:545287-545668    | WT_5hasex | WT_veg | OK     | 0,939434 | 6,7102   | 2,83649       | -1,93064      | 0,053528   | 0,186179   | no   |
| AN1177  | ChrVIII_A_nidulans_FGSC_A4:1288697-1291941 | WT_5hasex | WT_veg | OK     | 55,5062  | 64,1117  | 0,207937      | -0,427122     | 0,669291   | 0,852059   | no   |
| AN11770 | ChrIII_A_nidulans_FGSC_A4:517634-518435    | WT_5hasex | WT_veg | OK     | 93,3108  | 194,099  | 1,05668       | -2,06131      | 0,0392735  | 0,148851   | no   |
| AN11771 | ChrIII_A_nidulans_FGSC_A4:388810-389144    | WT_5hasex | WT_veg | OK     | 9,18528  | 12,8231  | 0,481347      | -0,560751     | 0,574967   | 0,798173   | no   |
| AN11772 | ChrIII_A_nidulans_FGSC_A4:379988-381455    | WT_5hasex | WT_veg | OK     | 15,0875  | 9,34503  | -0,691082     | 1,20522       | 0,228119   | 0,491165   | no   |
| AN11773 | ChrIII_A_nidulans_FGSC_A4:324341-326703    | WT_5hasex | WT_veg | OK     | 6,66585  | 47,0193  | 2,81839       | -4,7887       | 1,6786E-06 | 2,9351E-05 | yes  |
| AN11774 | ChrIII_A_nidulans_FGSC_A4:322138-323650    | WT_5hasex | WT_veg | OK     | 9,67055  | 12,7474  | 0,398533      | -0,655845     | 0,511924   | 0,757342   | no   |
| AN11775 | ChrIII_A_nidulans_FGSC_A4:300113-300779    | WT_5hasex | WT_veg | OK     | 49,4431  | 90,0343  | 0,864706      | -1,59839      | 0,109956   | 0,309165   | no   |
| AN11776 | ChrIII_A_nidulans_FGSC_A4:294203-294889    | WT_5hasex | WT_veg | OK     | 20,9011  | 46,9089  | 1,16628       | -1,87998      | 0,0601109  | 0,202594   | no   |
| AN11777 | ChrIII_A_nidulans_FGSC_A4:285542-288237    | WT_5hasex | WT_veg | NOTEST | 0,243601 | 0        | -1.79769e+308 | -1.79769e+308 | 0,114919   |            | 1 no |
| AN11778 | ChrIII_A_nidulans_FGSC_A4:283019-284812    | WT_5hasex | WT_veg | OK     | 29,3094  | 27,4322  | -0,0954912    | 0,192944      | 0,847003   | 0,939658   | no   |
| AN11779 | ChrIII_A_nidulans_FGSC_A4:243607-244446    | WT_5hasex | WT_veg | NOTEST | 1,15634  | 0        | -1.79769e+308 | -1.79769e+308 | 0,081629   |            | 1 no |
| AN1178  | ChrVIII_A_nidulans_FGSC_A4:1287665-1288447 | WT_5hasex | WT_veg | OK     | 99,271   | 177,85   | 0,841221      | -1,67837      | 0,0932746  | 0,275756   | no   |
| AN11780 | ChrIII_A_nidulans_FGSC_A4:210001-210301    | WT_5hasex | WT_veg | OK     | 3,96761  | 15,7396  | 1,98806       | -1,88464      | 0,0594782  | 0,201095   | no   |
| AN11781 | ChrV_A_nidulans_FGSC_A4:2194074-2196833    | WT_5hasex | WT_veg | NOTEST | 0,358193 | 0        | -1.79769e+308 | -1.79769e+308 | 0,179325   |            | 1 no |
| AN11782 | ChrV_A_nidulans_FGSC_A4:2184797-2186518    | WT_5hasex | WT_veg | NOTEST | 1,54635  | 0,911557 | -0,762461     | 0,392605      | 0,694611   |            | 1 no |
| AN11783 | ChrV_A_nidulans_FGSC_A4:2178020-2182109    | WT_5hasex | WT_veg | NOTEST | 0,232365 | 1,52801  | 2,71719       | -1,58268      | 0,113494   |            | 1 no |
| AN11784 | ChrV_A_nidulans_FGSC_A4:2119167-2119536    | WT_5hasex | WT_veg | OK     | 61,6053  | 169,378  | 1,45912       | -2,48826      | 0,0128368  | 0,0634407  | no   |
| AN11785 | ChrV_A_nidulans_FGSC_A4:2063639-2064119    | WT_5hasex | WT_veg | OK     | 2,71667  | 5,15812  | 0,925007      | -0,904017     | 0,365987   | 0,6408     | no   |
| AN11787 | ChrV_A_nidulans_FGSC_A4:1957539-1958019    | WT_5hasex | WT_veg | OK     | 6338,4   | 6253,43  | -0,0194721    | 0,0289069     | 0,976939   | 0,992027   | no   |
| AN11788 | ChrV_A_nidulans_FGSC_A4:1954108-1955225    | WT_5hasex | WT_veg | OK     | 32,0786  | 89,0504  | 1,47301       | -2,85474      | 0,00430716 | 0,0263673  | yes  |
| AN11789 | ChrV_A_nidulans_FGSC_A4:1911604-1912390    | WT_5hasex | WT_veg | OK     | 300,308  | 685,02   | 1,1897        | -2,36212      | 0,0181709  | 0,084305   | no   |
| AN1179  | ChrVIII_A_nidulans_FGSC_A4:1285324-1287347 | WT_5hasex | WT_veg | OK     | 108,79   | 119,259  | 0,132558      | -0,272101     | 0,785544   | 0,912446   | no   |
| AN11791 | ChrVII_A_nidulans_FGSC_A4:1938408-1938861  | WT_5hasex | WT_veg | NOTEST | 0        | 0        | 0             | 0             | 1          |            | 1 no |
| AN11792 | ChrVII_A_nidulans_FGSC_A4:1989831-1991296  | WT_5hasex | WT_veg | OK     | 3,08508  | 8,53468  | 1,46803       | -1,93008      | 0,0535975  | 0,186359   | no   |
| AN11793 | ChrVII_A_nidulans_FGSC_A4:1991399-1993545  | WT_5hasex | WT_veg | OK     | 3,26204  | 3,90939  | 0,261172      | -0,374095     | 0,708333   | 0,874169   | no   |
| AN11794 | ChrVII_A_nidulans_FGSC_A4:2022428-2023564  | WT_5hasex | WT_veg | OK     | 7,24662  | 19,5268  | 1,43008       | -2,1812       | 0,0291684  | 0,118699   | no   |
| AN11795 | ChrVII_A_nidulans_FGSC_A4:2023723-2024694  | WT_5hasex | WT_veg | OK     | 6,16839  | 20,0567  | 1,70112       | -2,4595       | 0,0139131  | 0,0674693  | no   |
| AN11796 | ChrVII_A_nidulans_FGSC_A4:2093330-2094050  | WT_5hasex | WT_veg | OK     | 26,0618  | 46,6064  | 0,838588      | -1,42266      | 0,154835   | 0,386953   | no   |
| AN11797 | ChrVII_A_nidulans_FGSC_A4:2261806-2262110  | WT_5hasex | WT_veg | OK     | 71,403   | 156,636  | 1,13336       | -1,81917      | 0,0688859  | 0,222935   | no   |
| AN11798 | ChrVII_A_nidulans_FGSC_A4:2298054-2301330  | WT_5hasex | WT_veg | NOTEST | 1,43657  | 2,12723  | 0,566348      | -0,60309      | 0,546449   |            | 1 no |
| AN11799 | ChrVII_A_nidulans_FGSC_A4:2301987-2302715  | WT_5hasex | WT_veg | NOTEST | 0,371836 | 0        | -1.79769e+308 | -1.79769e+308 | 0,23809    |            | 1 no |
| AN11800 | ChrVII_A_nidulans_FGSC_A4:2321137-2324343  | WT_5hasex | WT_veg | OK     | 4,16587  | 17,2194  | 2,04734       | -2,24346      | 0,0248675  | 0,104954   | no   |
| AN11801 | ChrVII_A_nidulans_FGSC_A4:2354721-2355300  | WT_5hasex | WT_veg | OK     | 29,8789  | 188,389  | 2,65651       | -4,51527      | 6,3237E-06 | 9,558E-05  | yes  |
| AN11802 | ChrVII_A_nidulans_FGSC_A4:2368999-2369706  | WT_5hasex | WT_veg | OK     | 41,2937  | 71,2064  | 0,786086      | -1,42853      | 0,153139   | 0,384355   | no   |
| AN11803 | ChrVII_A_nidulans_FGSC_A4:2392379-2393493  | WT_5hasex | WT_veg | OK     | 11,0173  | 28,5787  | 1,37517       | -2,24349      | 0,0248651  | 0,104952   | no   |
| AN11804 | ChrVII_A_nidulans_FGSC_A4:2393776-2397265  | WT_5hasex | WT_veg | OK     | 4,99549  | 6,06894  | 0,280816      | -0,481181     | 0,630388   | 0,830739   | no   |
| AN11808 | ChrV_A_nidulans_FGSC_A4:2923772-2924698    | WT_5hasex | WT_veg | OK     | 14,3863  | 22,8245  | 0,665883      | -1,05455      | 0,291631   | 0,56636    | no   |
| AN11809 | ChrV_A_nidulans_FGSC_A4:2869507-2871481    | WT_5hasex | WT_veg | NOTEST | 0,236164 | 1,43223  | 2,6004        | -1,86713      | 0,0618832  |            | 1 no |
| AN11810 | ChrV_A_nidulans_FGSC_A4:2868599-2869295    | WT_5hasex | WT_veg | OK     | 3,24774  | 7,31575  | 1,17157       | -1,4018       | 0,160976   | 0,396591   | no   |

## Supplementary table 1

|         |                                            |           |        |        |          |          |               |               |            |            |      |
|---------|--------------------------------------------|-----------|--------|--------|----------|----------|---------------|---------------|------------|------------|------|
| AN11811 | ChrV_A_nidulans_FGSC_A4:2720210-2720860    | WT_5hasex | WT_veg | NOTEST | 0        | 0        | 0             | 0             | 1          | 1          | no   |
| AN11812 | ChrV_A_nidulans_FGSC_A4:2714943-2715551    | WT_5hasex | WT_veg | NOTEST | 0        | 3,47889  | 1.79769e+308  | 1.79769e+308  | 0,036343   |            | 1 no |
| AN11813 | ChrV_A_nidulans_FGSC_A4:2669775-2670678    | WT_5hasex | WT_veg | OK     | 51,1784  | 72,2447  | 0,497356      | -0,962088     | 0,336006   | 0,612122   | no   |
| AN11814 | ChrV_A_nidulans_FGSC_A4:2595543-2596002    | WT_5hasex | WT_veg | NOTEST | 1,38526  | 0        | -1.79769e+308 | -1.79769e+308 | 0,0793015  |            | 1 no |
| AN11815 | ChrV_A_nidulans_FGSC_A4:2567602-2568475    | WT_5hasex | WT_veg | OK     | 17,861   | 63,5846  | 1,83186       | -3,14639      | 0,001653   | 0,01191    | yes  |
| AN11817 | ChrVIII_A_nidulans_FGSC_A4:25125-25504     | WT_5hasex | WT_veg | OK     | 5,01351  | 8,21815  | 0,712993      | -0,680328     | 0,496297   | 0,746918   | no   |
| AN11818 | ChrVIII_A_nidulans_FGSC_A4:168609-170245   | WT_5hasex | WT_veg | OK     | 2,27099  | 3,71489  | 0,71          | -0,875574     | 0,381262   | 0,655561   | no   |
| AN11820 | ChrVIII_A_nidulans_FGSC_A4:186926-190188   | WT_5hasex | WT_veg | NOTEST | 0,748342 | 0        | -1.79769e+308 | -1.79769e+308 | 0,0261488  |            | 1 no |
| AN11821 | ChrVIII_A_nidulans_FGSC_A4:190659-192330   | WT_5hasex | WT_veg | NOTEST | 0,384828 | 0,122905 | -1,64667      | 0,53951       | 0,589535   |            | 1 no |
| AN11823 | ChrVIII_A_nidulans_FGSC_A4:311444-312926   | WT_5hasex | WT_veg | OK     | 2,25433  | 6,48267  | 1,52389       | -1,92457      | 0,0542827  | 0,188055   | no   |
| AN11824 | ChrVIII_A_nidulans_FGSC_A4:313650-315357   | WT_5hasex | WT_veg | OK     | 48,2495  | 30,0247  | -0,684363     | 1,4056        | 0,159842   | 0,395208   | no   |
| AN11825 | ChrVIII_A_nidulans_FGSC_A4:348156-348846   | WT_5hasex | WT_veg | OK     | 1,34888  | 6,47479  | 2,26307       | -2,37522      | 0,0175383  | 0,0805826  | no   |
| AN11828 | ChrVIII_A_nidulans_FGSC_A4:410073-411159   | WT_5hasex | WT_veg | OK     | 9,96602  | 18,0472  | 0,856684      | -1,35449      | 0,175579   | 0,419959   | no   |
| AN1183  | ChrVIII_A_nidulans_FGSC_A4:1262574-1264978 | WT_5hasex | WT_veg | NOTEST | 0,49012  | 0,478148 | -0,0356778    | 0,0274309     | 0,978116   |            | 1 no |
| AN11832 | ChrVIII_A_nidulans_FGSC_A4:547114-548505   | WT_5hasex | WT_veg | OK     | 34,9229  | 62,5352  | 0,840494      | -1,69007      | 0,0910146  | 0,271055   | no   |
| AN11836 | ChrVI_A_nidulans_FGSC_A4:849454-850164     | WT_5hasex | WT_veg | OK     | 1,55022  | 4,32704  | 1,48091       | -1,46616      | 0,142606   | 0,366909   | no   |
| AN11837 | ChrVI_A_nidulans_FGSC_A4:788979-789430     | WT_5hasex | WT_veg | OK     | 90,166   | 163,054  | 0,854694      | -1,56037      | 0,118673   | 0,325281   | no   |
| AN1184  | ChrVIII_A_nidulans_FGSC_A4:1261153-1262491 | WT_5hasex | WT_veg | OK     | 2,91197  | 3,91755  | 0,427956      | -0,55084      | 0,581743   | 0,802182   | no   |
| AN11840 | ChrVIII_A_nidulans_FGSC_A4:1582410-1583322 | WT_5hasex | WT_veg | OK     | 4,59746  | 3,4695   | -0,40611      | 0,438011      | 0,661379   | 0,848013   | no   |
| AN11841 | ChrVIII_A_nidulans_FGSC_A4:1559900-1562442 | WT_5hasex | WT_veg | OK     | 17,1135  | 34,0984  | 0,994564      | -1,41879      | 0,155961   | 0,388804   | no   |
| AN11842 | ChrVIII_A_nidulans_FGSC_A4:1480169-1481488 | WT_5hasex | WT_veg | NOTEST | 0,667904 | 0        | -1.79769e+308 | -1.79769e+308 | 0,107729   |            | 1 no |
| AN11843 | ChrVIII_A_nidulans_FGSC_A4:1403201-1403504 | WT_5hasex | WT_veg | OK     | 19,843   | 137,476  | 2,79248       | -4,1099       | 3,9583E-05 | 0,00048852 | yes  |
| AN11844 | ChrVIII_A_nidulans_FGSC_A4:1383391-1384356 | WT_5hasex | WT_veg | OK     | 1,19892  | 4,35228  | 1,86003       | -1,69174      | 0,0906946  | 0,27048    | no   |
| AN11845 | ChrVIII_A_nidulans_FGSC_A4:1380250-1380782 | WT_5hasex | WT_veg | OK     | 6,2503   | 19,0809  | 1,61013       | -1,91089      | 0,0560188  | 0,192328   | no   |
| AN11846 | ChrVIII_A_nidulans_FGSC_A4:4460858-4462628 | WT_5hasex | WT_veg | OK     | 0        | 35,2681  | 1.79769e+308  | 1.79769e+308  | 0,00418287 | 0,0257246  | yes  |
| AN11849 | ChrVIII_A_nidulans_FGSC_A4:4398520-4400860 | WT_5hasex | WT_veg | OK     | 8,6939   | 22,8265  | 1,39263       | -2,0276       | 0,0426011  | 0,157913   | no   |
| AN1185  | ChrVIII_A_nidulans_FGSC_A4:1259131-1260785 | WT_5hasex | WT_veg | OK     | 0,537143 | 4,32197  | 3,00831       | -2,88342      | 0,00393383 | 0,024459   | yes  |
| AN11850 | ChrVIII_A_nidulans_FGSC_A4:4084483-4085469 | WT_5hasex | WT_veg | OK     | 19,1284  | 22,1904  | 0,214215      | -0,330631     | 0,740923   | 0,891277   | no   |
| AN11851 | ChrI_A_nidulans_FGSC_A4:780858-781473      | WT_5hasex | WT_veg | OK     | 3,21344  | 1,82099  | -0,819399     | 0,541244      | 0,58834    | 0,806081   | no   |
| AN11852 | ChrI_A_nidulans_FGSC_A4:755058-755508      | WT_5hasex | WT_veg | OK     | 2,93671  | 21,8758  | 2,89706       | -3,29963      | 0,00096814 | 0,00763956 | yes  |
| AN11853 | ChrI_A_nidulans_FGSC_A4:567765-570974      | WT_5hasex | WT_veg | OK     | 7,95937  | 14,8019  | 0,895058      | -1,63257      | 0,10256    | 0,294814   | no   |
| AN11854 | ChrI_A_nidulans_FGSC_A4:566795-567470      | WT_5hasex | WT_veg | OK     | 21,7838  | 67,3911  | 1,6293        | -2,69328      | 0,00707523 | 0,0394421  | yes  |
| AN11855 | ChrI_A_nidulans_FGSC_A4:426392-427075      | WT_5hasex | WT_veg | NOTEST | 0        | 0        | 0             | 0             | 1          | 1          | no   |
| AN11856 | ChrI_A_nidulans_FGSC_A4:424306-424907      | WT_5hasex | WT_veg | NOTEST | 0        | 0        | 0             | 0             | 1          | 1          | no   |
| AN11857 | ChrI_A_nidulans_FGSC_A4:421973-422704      | WT_5hasex | WT_veg | NOTEST | 0        | 0        | 0             | 0             | 1          | 1          | no   |
| AN11858 | ChrI_A_nidulans_FGSC_A4:377039-378804      | WT_5hasex | WT_veg | OK     | 21,0424  | 63,1311  | 1,58505       | -3,10179      | 0,00192355 | 0,0135063  | yes  |
| AN11859 | ChrI_A_nidulans_FGSC_A4:375455-376804      | WT_5hasex | WT_veg | OK     | 34,4694  | 52,9934  | 0,620497      | -1,20577      | 0,227906   | 0,491005   | no   |
| AN1186  | ChrVIII_A_nidulans_FGSC_A4:1255125-1256794 | WT_5hasex | WT_veg | OK     | 2,24624  | 4,00736  | 0,835143      | -1,07792      | 0,281068   | 0,554725   | no   |
| AN11860 | ChrVII_A_nidulans_FGSC_A4:2592922-2593314  | WT_5hasex | WT_veg | OK     | 2,26398  | 5,52166  | 1,28624       | -1,12657      | 0,259923   | 0,530331   | no   |
| AN11861 | ChrVII_A_nidulans_FGSC_A4:2725681-2726940  | WT_5hasex | WT_veg | OK     | 11,0091  | 67,3523  | 2,61302       | -4,2567       | 2,0747E-05 | 0,00027537 | yes  |
| AN11862 | ChrVII_A_nidulans_FGSC_A4:2727139-2727796  | WT_5hasex | WT_veg | OK     | 83,2586  | 351,986  | 2,07985       | -4,19596      | 2,7172E-05 | 0,00035105 | yes  |
| AN11863 | ChrVII_A_nidulans_FGSC_A4:2738148-2739032  | WT_5hasex | WT_veg | NOTEST | 0        | 0        | 0             | 0             | 1          | 1          | no   |
| AN11864 | ChrVII_A_nidulans_FGSC_A4:2811586-2815780  | WT_5hasex | WT_veg | OK     | 16,2799  | 38,0701  | 1,22557       | -2,18752      | 0,0287046  | 0,117184   | no   |
| AN11865 | ChrVII_A_nidulans_FGSC_A4:2875581-2880455  | WT_5hasex | WT_veg | OK     | 5,70092  | 7,63412  | 0,421269      | -0,636569     | 0,524406   | 0,766012   | no   |
| AN11866 | ChrVII_A_nidulans_FGSC_A4:2929502-2929845  | WT_5hasex | WT_veg | OK     | 150,668  | 638,693  | 2,08375       | -4,01378      | 5,9755E-05 | 0,00069973 | yes  |
| AN11867 | ChrVII_A_nidulans_FGSC_A4:2933923-2936050  | WT_5hasex | WT_veg | OK     | 42,5491  | 43,3356  | 0,0264255     | -0,0533805    | 0,957429   | 0,984232   | no   |
| AN11869 | ChrVII_A_nidulans_FGSC_A4:2972366-2972924  | WT_5hasex | WT_veg | OK     | 2,0451   | 38,9825  | 4,25258       | -4,58429      | 4,5554E-06 | 7,1123E-05 | yes  |
| AN1187  | ChrVIII_A_nidulans_FGSC_A4:1253196-1254678 | WT_5hasex | WT_veg | OK     | 16,3706  | 25,4029  | 0,633891      | -1,08886      | 0,276215   | 0,549305   | no   |
| AN11871 | ChrV_A_nidulans_FGSC_A4:303033-305865      | WT_5hasex | WT_veg | NOTEST | 0        | 0        | 0             | 0             | 1          | 1          | no   |
| AN11872 | ChrV_A_nidulans_FGSC_A4:416898-417304      | WT_5hasex | WT_veg | OK     | 57,4343  | 109,174  | 0,926641      | -1,45868      | 0,144654   | 0,370397   | no   |
| AN11873 | ChrV_A_nidulans_FGSC_A4:522032-523097      | WT_5hasex | WT_veg | OK     | 6,07787  | 16,7796  | 1,46507       | -2,01727      | 0,043667   | 0,160838   | no   |
| AN11874 | ChrV_A_nidulans_FGSC_A4:523442-528619      | WT_5hasex | WT_veg | OK     | 11,0952  | 50,2712  | 2,17979       | -3,77386      | 0,00016074 | 0,00165153 | yes  |
| AN11875 | ChrV_A_nidulans_FGSC_A4:552791-553452      | WT_5hasex | WT_veg | NOTEST | 0,593117 | 0        | -1.79769e+308 | -1.79769e+308 | 0,224063   |            | 1 no |

## Supplementary table 1

|         |                                            |           |        |        |          |          |               |               |            |            |     |
|---------|--------------------------------------------|-----------|--------|--------|----------|----------|---------------|---------------|------------|------------|-----|
| AN11876 | ChrV_A_nidulans_FGSC_A4:579327-579768      | WT_5hasex | WT_veg | NOTEST | 1,37858  | 0        | -1.79769e+308 | -1.79769e+308 | 0,0649158  | 1          | no  |
| AN11877 | ChrV_A_nidulans_FGSC_A4:646029-646465      | WT_5hasex | WT_veg | NOTEST | 0,302536 | 0,294379 | -0,0394318    | 0,00603921    | 0,995181   | 1          | no  |
| AN11878 | ChrV_A_nidulans_FGSC_A4:663459-664481      | WT_5hasex | WT_veg | NOTEST | 0,91624  | 1,93948  | 1,08188       | -0,906116     | 0,364875   | 1          | no  |
| AN11879 | ChrV_A_nidulans_FGSC_A4:679015-679333      | WT_5hasex | WT_veg | OK     | 3,18938  | 6,18162  | 0,954708      | -0,823238     | 0,410373   | 0,680343   | no  |
| AN1188  | ChrVIII_A_nidulans_FGSC_A4:1251198-1252898 | WT_5hasex | WT_veg | OK     | 38,1617  | 121,694  | 1,67306       | -3,3968       | 0,00068179 | 0,00566561 | yes |
| AN11880 | ChrVII_A_nidulans_FGSC_A4:1334699-1336049  | WT_5hasex | WT_veg | OK     | 17,5202  | 29,1857  | 0,736243      | -1,30895      | 0,190551   | 0,441431   | no  |
| AN11881 | ChrVII_A_nidulans_FGSC_A4:1336839-1337417  | WT_5hasex | WT_veg | OK     | 3,38231  | 1,72782  | -0,96905      | 0,657908      | 0,510597   | 0,756416   | no  |
| AN11882 | ChrVII_A_nidulans_FGSC_A4:1389343-1389640  | WT_5hasex | WT_veg | OK     | 52,3096  | 289,417  | 2,468         | -3,78935      | 0,00015104 | 0,00156268 | yes |
| AN11883 | ChrVII_A_nidulans_FGSC_A4:1490624-1490930  | WT_5hasex | WT_veg | OK     | 12,8006  | 3,246    | -1,97948      | 1,37154       | 0,170207   | 0,411269   | no  |
| AN11884 | ChrVII_A_nidulans_FGSC_A4:1497804-1498281  | WT_5hasex | WT_veg | OK     | 6,76391  | 3,29186  | -1,03895      | 0,975763      | 0,329182   | 0,605702   | no  |
| AN11885 | ChrVII_A_nidulans_FGSC_A4:1501851-1504224  | WT_5hasex | WT_veg | OK     | 5,46376  | 7,59842  | 0,475807      | -0,785536     | 0,432139   | 0,698531   | no  |
| AN11886 | ChrVII_A_nidulans_FGSC_A4:1505050-1507658  | WT_5hasex | WT_veg | OK     | 125,765  | 65,5274  | -0,940555     | 1,84665       | 0,0647983  | 0,213504   | no  |
| AN11887 | ChrVII_A_nidulans_FGSC_A4:1515056-1516849  | WT_5hasex | WT_veg | OK     | 20,3702  | 46,6719  | 1,1961        | -2,33443      | 0,0195733  | 0,0876498  | no  |
| AN11888 | ChrVII_A_nidulans_FGSC_A4:1672709-1673752  | WT_5hasex | WT_veg | OK     | 23,7637  | 26,791   | 0,172992      | -0,308206     | 0,757926   | 0,900011   | no  |
| AN11889 | ChrVII_A_nidulans_FGSC_A4:1675408-1676319  | WT_5hasex | WT_veg | OK     | 20,7363  | 18,9263  | -0,131763     | 0,21977       | 0,82605    | 0,930757   | no  |
| AN11891 | ChrVIII_A_nidulans_FGSC_A4:1969625-1971535 | WT_5hasex | WT_veg | OK     | 102,748  | 271,577  | 1,40225       | -2,86465      | 0,00417471 | 0,0256885  | yes |
| AN11892 | ChrVIII_A_nidulans_FGSC_A4:1965381-1968633 | WT_5hasex | WT_veg | OK     | 9,89608  | 30,5133  | 1,62451       | -3,13009      | 0,00174751 | 0,0124886  | yes |
| AN11893 | ChrVIII_A_nidulans_FGSC_A4:1952224-1952955 | WT_5hasex | WT_veg | OK     | 13,9751  | 33,4313  | 1,25834       | -1,93957      | 0,0524322  | 0,183415   | no  |
| AN11894 | ChrVIII_A_nidulans_FGSC_A4:1951201-1951949 | WT_5hasex | WT_veg | OK     | 7,32243  | 24,9729  | 1,76997       | -2,29384      | 0,0217995  | 0,0951392  | no  |
| AN11896 | ChrVIII_A_nidulans_FGSC_A4:1948653-1949123 | WT_5hasex | WT_veg | OK     | 11,0203  | 14,9282  | 0,437871      | -0,51226      | 0,608469   | 0,81834    | no  |
| AN11897 | ChrVIII_A_nidulans_FGSC_A4:1936957-1937941 | WT_5hasex | WT_veg | OK     | 219,743  | 259,067  | 0,237505      | -0,374816     | 0,707797   | 0,873852   | no  |
| AN11898 | ChrI_A_nidulans_FGSC_A4:2872041-2873111    | WT_5hasex | WT_veg | OK     | 82,0352  | 140,532  | 0,77658       | -1,57996      | 0,114117   | 0,31692    | no  |
| AN11899 | ChrI_A_nidulans_FGSC_A4:2937736-2938377    | WT_5hasex | WT_veg | OK     | 15,7545  | 30,0189  | 0,930107      | -1,42304      | 0,154725   | 0,386808   | no  |
| AN11900 | ChrI_A_nidulans_FGSC_A4:2955862-2957361    | WT_5hasex | WT_veg | OK     | 91,6592  | 93,5911  | 0,0300915     | -0,0612385    | 0,951169   | 0,982048   | no  |
| AN11901 | ChrI_A_nidulans_FGSC_A4:2969555-2973439    | WT_5hasex | WT_veg | OK     | 25,6404  | 32,1761  | 0,32757       | -0,472282     | 0,636726   | 0,83403    | no  |
| AN11902 | ChrI_A_nidulans_FGSC_A4:3019241-3020078    | WT_5hasex | WT_veg | OK     | 58,0688  | 112,725  | 0,956978      | -1,90355      | 0,0569693  | 0,194663   | no  |
| AN11903 | ChrI_A_nidulans_FGSC_A4:3041301-3043188    | WT_5hasex | WT_veg | OK     | 23,5954  | 7,35223  | -1,68225      | 3,15758       | 0,00159087 | 0,0115388  | yes |
| AN11904 | ChrI_A_nidulans_FGSC_A4:3043501-3044089    | WT_5hasex | WT_veg | OK     | 11,2224  | 1,1338   | -3,30714      | 2,29411       | 0,0217841  | 0,0951038  | no  |
| AN11905 | ChrI_A_nidulans_FGSC_A4:3089501-3089835    | WT_5hasex | WT_veg | NOTEST | 0        | 0        | 0             | 0             | 1          | 1          | no  |
| AN11906 | ChrI_A_nidulans_FGSC_A4:3089850-3090075    | WT_5hasex | WT_veg | NOTEST | 1,05313  | 0        | -1.79769e+308 | -1.79769e+308 | 0,165569   | 1          | no  |
| AN11907 | ChrI_A_nidulans_FGSC_A4:3180205-3181148    | WT_5hasex | WT_veg | OK     | 2,45582  | 0        | -1.79769e+308 | -1.79769e+308 | 0,0521996  | 0,182821   | no  |
| AN11908 | ChrI_A_nidulans_FGSC_A4:3205654-3206692    | WT_5hasex | WT_veg | OK     | 6,99993  | 29,5914  | 2,07976       | -3,06597      | 0,00216964 | 0,0149596  | yes |
| AN11909 | ChrIII_A_nidulans_FGSC_A4:1893361-1893547  | WT_5hasex | WT_veg | NOTEST | 0        | 0        | 0             | 0             | 1          | 1          | no  |
| AN11910 | ChrIII_A_nidulans_FGSC_A4:1827098-1827805  | WT_5hasex | WT_veg | OK     | 47,8778  | 51,5259  | 0,105939      | -0,194304     | 0,845938   | 0,93915    | no  |
| AN11911 | ChrIII_A_nidulans_FGSC_A4:1731864-1734612  | WT_5hasex | WT_veg | NOTEST | 0,197209 | 0        | -1.79769e+308 | -1.79769e+308 | 0,314531   | 1          | no  |
| AN11912 | ChrIII_A_nidulans_FGSC_A4:1683742-1685243  | WT_5hasex | WT_veg | OK     | 22,2472  | 31,0616  | 0,48151       | -0,910751     | 0,362427   | 0,637226   | no  |
| AN11913 | ChrIII_A_nidulans_FGSC_A4:1682264-1683484  | WT_5hasex | WT_veg | OK     | 58,4323  | 79,1161  | 0,437204      | -0,893894     | 0,371379   | 0,646137   | no  |
| AN11914 | ChrIII_A_nidulans_FGSC_A4:1597992-1598621  | WT_5hasex | WT_veg | OK     | 5,31855  | 14,8131  | 1,47777       | -1,8198       | 0,0687893  | 0,222705   | no  |
| AN11915 | ChrI_A_nidulans_FGSC_A4:322899-324200      | WT_5hasex | WT_veg | OK     | 61,9506  | 86,8957  | 0,488167      | -0,999893     | 0,317362   | 0,593604   | no  |
| AN11916 | ChrI_A_nidulans_FGSC_A4:295630-297112      | WT_5hasex | WT_veg | NOTEST | 0        | 0        | 0             | 0             | 1          | 1          | no  |
| AN11917 | ChrI_A_nidulans_FGSC_A4:294117-295121      | WT_5hasex | WT_veg | NOTEST | 0        | 0,719686 | 1.79769e+308  | 1.79769e+308  | 0,134707   | 1          | no  |
| AN1192  | ChrVIII_A_nidulans_FGSC_A4:1236531-1237645 | WT_5hasex | WT_veg | OK     | 42,0325  | 129,386  | 1,62211       | -3,22497      | 0,00125986 | 0,00949643 | yes |
| AN11920 | ChrI_A_nidulans_FGSC_A4:165801-167165      | WT_5hasex | WT_veg | OK     | 17,7316  | 11,97    | -0,566909     | 0,945858      | 0,344221   | 0,61957    | no  |
| AN11921 | ChrI_A_nidulans_FGSC_A4:163680-165215      | WT_5hasex | WT_veg | OK     | 248,029  | 403,249  | 0,701164      | -1,33572      | 0,18164    | 0,428501   | no  |
| AN11922 | ChrI_A_nidulans_FGSC_A4:135150-136464      | WT_5hasex | WT_veg | NOTEST | 0,296242 | 0        | -1.79769e+308 | -1.79769e+308 | 0,224063   | 1          | no  |
| AN11923 | ChrI_A_nidulans_FGSC_A4:86778-87406        | WT_5hasex | WT_veg | NOTEST | 1,30645  | 0        | -1.79769e+308 | -1.79769e+308 | 0,0966285  | 1          | no  |
| AN11924 | ChrI_A_nidulans_FGSC_A4:72546-74992        | WT_5hasex | WT_veg | NOTEST | 1,09627  | 2,13364  | 0,960721      | -1,09961      | 0,271502   | 1          | no  |
| AN11925 | ChrI_A_nidulans_FGSC_A4:0-477              | WT_5hasex | WT_veg | NOTEST | 0        | 0        | 0             | 0             | 1          | 1          | no  |
| AN11926 | ChrVI_A_nidulans_FGSC_A4:515872-517436     | WT_5hasex | WT_veg | NOTEST | 0        | 1,46806  | 1.79769e+308  | 1.79769e+308  | 0,0664185  | 1          | no  |
| AN11928 | ChrVI_A_nidulans_FGSC_A4:470382-470886     | WT_5hasex | WT_veg | NOTEST | 0        | 0,378317 | 1.79769e+308  | 1.79769e+308  | 0,309884   | 1          | no  |
| AN11929 | ChrVI_A_nidulans_FGSC_A4:457942-458945     | WT_5hasex | WT_veg | OK     | 20,6751  | 83,798   | 2,01902       | -3,56685      | 0,00036129 | 0,00329433 | yes |
| AN1193  | ChrVIII_A_nidulans_FGSC_A4:1233157-1235689 | WT_5hasex | WT_veg | OK     | 2,26275  | 2,7137   | 0,262183      | -0,35462      | 0,722874   | 0,88206    | no  |
| AN11930 | ChrVI_A_nidulans_FGSC_A4:456245-457698     | WT_5hasex | WT_veg | NOTEST | 1,13118  | 1,63842  | 0,534485      | -0,458548     | 0,646559   | 1          | no  |

## Supplementary table 1

|         |                                            |           |        |        |          |          |               |               |            |            |     |
|---------|--------------------------------------------|-----------|--------|--------|----------|----------|---------------|---------------|------------|------------|-----|
| AN11931 | ChrVI_A_nidulans_FGSC_A4:334435-335330     | WT_5hasex | WT_veg | OK     | 174,159  | 651,603  | 1,90359       | -3,81927      | 0,00013385 | 0,00141551 | yes |
| AN11932 | ChrVI_A_nidulans_FGSC_A4:302239-304587     | WT_5hasex | WT_veg | OK     | 97,1245  | 115,61   | 0,251354      | -0,508468     | 0,611125   | 0,819558   | no  |
| AN11934 | ChrVIII_A_nidulans_FGSC_A4:1096017-1101196 | WT_5hasex | WT_veg | OK     | 2,87475  | 1,96514  | -0,548808     | 0,803045      | 0,421949   | 0,689957   | no  |
| AN11935 | ChrVIII_A_nidulans_FGSC_A4:1007746-1008288 | WT_5hasex | WT_veg | OK     | 21,3266  | 80,0749  | 1,90869       | -2,98712      | 0,0028162  | 0,0185372  | yes |
| AN11936 | ChrVIII_A_nidulans_FGSC_A4:980372-982022   | WT_5hasex | WT_veg | OK     | 266,159  | 810,01   | 1,60565       | -2,87676      | 0,00401781 | 0,0248779  | yes |
| AN11937 | ChrVIII_A_nidulans_FGSC_A4:921410-922697   | WT_5hasex | WT_veg | OK     | 6,15796  | 20,8937  | 1,76255       | -2,02764      | 0,0425973  | 0,157913   | no  |
| AN11938 | ChrII_A_nidulans_FGSC_A4:513970-514288     | WT_5hasex | WT_veg | OK     | 54,7391  | 90,5787  | 0,7266        | -1,07583      | 0,282002   | 0,555815   | no  |
| AN11940 | ChrII_A_nidulans_FGSC_A4:636992-637346     | WT_5hasex | WT_veg | NOTEST | 0        | 0        | 0             | 0             | 1          | 1          | no  |
| AN11941 | ChrII_A_nidulans_FGSC_A4:779429-780753     | WT_5hasex | WT_veg | NOTEST | 0,20859  | 0        | -1.79769e+308 | -1.79769e+308 | 0,224063   | 1          | no  |
| AN11942 | ChrII_A_nidulans_FGSC_A4:781361-782135     | WT_5hasex | WT_veg | NOTEST | 0        | 1,0973   | 1.79769e+308  | 1.79769e+308  | 0,123323   | 1          | no  |
| AN11945 | ChrV_A_nidulans_FGSC_A4:3284713-3285722    | WT_5hasex | WT_veg | NOTEST | 0        | 0,877594 | 1.79769e+308  | 1.79769e+308  | 0,123323   | 1          | no  |
| AN11946 | ChrV_A_nidulans_FGSC_A4:3282797-3283627    | WT_5hasex | WT_veg | NOTEST | 0        | 0        | 0             | 0             | 1          | 1          | no  |
| AN11947 | ChrV_A_nidulans_FGSC_A4:3264614-3265996    | WT_5hasex | WT_veg | NOTEST | 1,00364  | 0,718993 | -0,481188     | 0,324283      | 0,745724   | 1          | no  |
| AN11948 | ChrV_A_nidulans_FGSC_A4:3260843-3263573    | WT_5hasex | WT_veg | NOTEST | 0,460438 | 2,45443  | 2,41431       | -2,54923      | 0,0107963  | 1          | no  |
| AN11949 | ChrV_A_nidulans_FGSC_A4:3239632-3240656    | WT_5hasex | WT_veg | NOTEST | 0        | 0        | 0             | 0             | 1          | 1          | no  |
| AN1195  | ChrVIII_A_nidulans_FGSC_A4:1230455-1231934 | WT_5hasex | WT_veg | OK     | 82,2553  | 76,4896  | -0,104845     | 0,216386      | 0,828687   | 0,931724   | no  |
| AN11950 | ChrV_A_nidulans_FGSC_A4:3236508-3238539    | WT_5hasex | WT_veg | NOTEST | 0        | 0        | 0             | 0             | 1          | 1          | no  |
| AN11951 | ChrV_A_nidulans_FGSC_A4:3222720-3223134    | WT_5hasex | WT_veg | OK     | 4,71111  | 12,1918  | 1,37177       | -1,55904      | 0,118986   | 0,32587    | no  |
| AN11953 | ChrV_A_nidulans_FGSC_A4:3202135-3203950    | WT_5hasex | WT_veg | NOTEST | 1,20027  | 2,54514  | 1,08438       | -1,27866      | 0,201016   | 1          | no  |
| AN11955 | ChrV_A_nidulans_FGSC_A4:3127392-3127890    | WT_5hasex | WT_veg | OK     | 6,01141  | 24,529   | 2,02871       | -2,66076      | 0,00779644 | 0,0426951  | yes |
| AN11956 | ChrV_A_nidulans_FGSC_A4:3097852-3099949    | WT_5hasex | WT_veg | OK     | 52,1548  | 85,7737  | 0,717736      | -1,46505      | 0,142908   | 0,367452   | no  |
| AN11957 | ChrV_A_nidulans_FGSC_A4:3052812-3052992    | WT_5hasex | WT_veg | OK     | 0        | 6,86543  | 1.79769e+308  | 1.79769e+308  | 0,123323   | 0,333265   | no  |
| AN11958 | ChrV_A_nidulans_FGSC_A4:2995760-2996336    | WT_5hasex | WT_veg | NOTEST | 0        | 0        | 0             | 0             | 1          | 1          | no  |
| AN11959 | ChrV_A_nidulans_FGSC_A4:2994602-2995145    | WT_5hasex | WT_veg | OK     | 2,55259  | 3,22407  | 0,336922      | -0,283377     | 0,776888   | 0,908721   | no  |
| AN1196  | ChrVIII_A_nidulans_FGSC_A4:1229029-1230006 | WT_5hasex | WT_veg | OK     | 80,5191  | 150,247  | 0,899937      | -1,86018      | 0,0628604  | 0,208759   | no  |
| AN11960 | ChrVII_A_nidulans_FGSC_A4:4230380-4232082  | WT_5hasex | WT_veg | OK     | 9,99231  | 15,1029  | 0,595935      | -0,796217     | 0,425906   | 0,693288   | no  |
| AN11961 | ChrVII_A_nidulans_FGSC_A4:4246262-4246589  | WT_5hasex | WT_veg | OK     | 58,1527  | 210,1    | 1,85316       | -2,96306      | 0,00304593 | 0,0198006  | yes |
| AN11962 | ChrVII_A_nidulans_FGSC_A4:4253027-4255570  | WT_5hasex | WT_veg | OK     | 2,44891  | 2,45323  | 0,00254112    | -0,00335495   | 0,997323   | 0,999008   | no  |
| AN11963 | ChrVII_A_nidulans_FGSC_A4:4416142-4416666  | WT_5hasex | WT_veg | NOTEST | 0,475287 | 0        | -1.79769e+308 | -1.79769e+308 | 0,224063   | 1          | no  |
| AN11964 | ChrVII_A_nidulans_FGSC_A4:4427565-4428528  | WT_5hasex | WT_veg | NOTEST | 0        | 0        | 0             | 0             | 1          | 1          | no  |
| AN11965 | ChrVIII_A_nidulans_FGSC_A4:4440550-4440937 | WT_5hasex | WT_veg | OK     | 21,8848  | 51,0525  | 1,22205       | -1,84834      | 0,0645535  | 0,212871   | no  |
| AN11966 | ChrVII_A_nidulans_FGSC_A4:4491304-4493430  | WT_5hasex | WT_veg | NOTEST | 0        | 0        | 0             | 0             | 1          | 1          | no  |
| AN11967 | ChrVII_A_nidulans_FGSC_A4:4522852-4523224  | WT_5hasex | WT_veg | NOTEST | 0        | 0        | 0             | 0             | 1          | 1          | no  |
| AN11968 | ChrI_A_nidulans_FGSC_A4:2007441-2008245    | WT_5hasex | WT_veg | OK     | 2,57087  | 8,53957  | 1,73191       | -2,13118      | 0,033074   | 0,130803   | no  |
| AN1197  | ChrVIII_A_nidulans_FGSC_A4:1225127-1227821 | WT_5hasex | WT_veg | OK     | 2,22893  | 5,77096  | 1,37246       | -1,7363       | 0,0825115  | 0,253267   | no  |
| AN11971 | ChrI_A_nidulans_FGSC_A4:1897587-1898098    | WT_5hasex | WT_veg | OK     | 35,9151  | 47,5724  | 0,405534      | -0,702278     | 0,482506   | 0,737001   | no  |
| AN11972 | ChrI_A_nidulans_FGSC_A4:1874702-1875349    | WT_5hasex | WT_veg | OK     | 6,25571  | 4,01738  | -0,638918     | 0,693777      | 0,487822   | 0,741146   | no  |
| AN11973 | ChrIII_A_nidulans_FGSC_A4:1366330-1367713  | WT_5hasex | WT_veg | OK     | 10,4151  | 17,3395  | 0,735385      | -1,25698      | 0,20876    | 0,466461   | no  |
| AN11974 | ChrIII_A_nidulans_FGSC_A4:1334453-1336044  | WT_5hasex | WT_veg | OK     | 8,60033  | 13,8161  | 0,683891      | -1,03686      | 0,299803   | 0,575341   | no  |
| AN11975 | ChrIII_A_nidulans_FGSC_A4:1324925-1325479  | WT_5hasex | WT_veg | OK     | 116,079  | 185,904  | 0,679443      | -1,31596      | 0,188186   | 0,438036   | no  |
| AN11976 | ChrIII_A_nidulans_FGSC_A4:1188435-1189269  | WT_5hasex | WT_veg | OK     | 0,9574   | 5,92209  | 2,62891       | -2,39674      | 0,0165418  | 0,0771185  | no  |
| AN11977 | ChrIII_A_nidulans_FGSC_A4:1181861-1183279  | WT_5hasex | WT_veg | OK     | 79,1338  | 648,177  | 3,03402       | -6,0566       | 1,3903E-09 | 4,7647E-08 | yes |
| AN11978 | ChrIII_A_nidulans_FGSC_A4:1124037-1124814  | WT_5hasex | WT_veg | OK     | 238,767  | 392,415  | 0,716776      | -1,46733      | 0,142285   | 0,366335   | no  |
| AN11979 | ChrI_A_nidulans_FGSC_A4:3216293-3217403    | WT_5hasex | WT_veg | OK     | 15,1243  | 2,05394  | -2,8804       | 3,06796       | 0,00215527 | 0,0148762  | yes |
| AN1198  | ChrVIII_A_nidulans_FGSC_A4:1222456-1224125 | WT_5hasex | WT_veg | OK     | 44,4699  | 188,587  | 2,08433       | -4,09024      | 4,3093E-05 | 0,00052676 | yes |
| AN11980 | ChrI_A_nidulans_FGSC_A4:3229019-3230104    | WT_5hasex | WT_veg | NOTEST | 1,35882  | 2,60333  | 0,938007      | -0,770259     | 0,441146   | 1          | no  |
| AN11981 | ChrI_A_nidulans_FGSC_A4:3243940-3245434    | WT_5hasex | WT_veg | OK     | 22,1579  | 27,2405  | 0,297931      | -0,495983     | 0,619906   | 0,824371   | no  |
| AN11982 | ChrI_A_nidulans_FGSC_A4:3246156-3246909    | WT_5hasex | WT_veg | OK     | 32,6322  | 35,148   | 0,107146      | -0,19385      | 0,846293   | 0,93933    | no  |
| AN11983 | ChrI_A_nidulans_FGSC_A4:3247915-3248816    | WT_5hasex | WT_veg | OK     | 29,9854  | 63,0321  | 1,07183       | -1,8778       | 0,0604084  | 0,203283   | no  |
| AN11984 | ChrI_A_nidulans_FGSC_A4:3254038-3256534    | WT_5hasex | WT_veg | OK     | 7,51797  | 2,71619  | -1,46876      | 2,28203       | 0,0224874  | 0,0972506  | no  |
| AN11985 | ChrI_A_nidulans_FGSC_A4:3256790-3257601    | WT_5hasex | WT_veg | OK     | 483,547  | 351,903  | -0,458478     | 0,800213      | 0,423587   | 0,691447   | no  |
| AN11986 | ChrI_A_nidulans_FGSC_A4:3257664-3258330    | WT_5hasex | WT_veg | NOTEST | 0,691225 | 0        | -1.79769e+308 | -1.79769e+308 | 0,133588   | 1          | no  |
| AN11987 | ChrI_A_nidulans_FGSC_A4:3282204-3282957    | WT_5hasex | WT_veg | OK     | 13,4158  | 32,2514  | 1,26543       | -1,92271      | 0,054517   | 0,18868    | no  |

## Supplementary table 1

|         |                                            |           |        |        |          |         |               |               |            |            |     |
|---------|--------------------------------------------|-----------|--------|--------|----------|---------|---------------|---------------|------------|------------|-----|
| AN11988 | ChrI_A_nidulans_FGSC_A4:3317021-3317457    | WT_5hasex | WT_veg | NOTEST | 0        | 2,47068 | 1.79769e+308  | 1.79769e+308  | 0,123323   | 1          | no  |
| AN11989 | ChrI_A_nidulans_FGSC_A4:3350097-3351511    | WT_5hasex | WT_veg | NOTEST | 1,77728  | 3,49066 | 0,973826      | -0,991835     | 0,321278   | 1          | no  |
| AN1199  | ChrVIII_A_nidulans_FGSC_A4:1219701-1221982 | WT_5hasex | WT_veg | OK     | 78,7854  | 921,999 | 3,54876       | -7,06456      | 1,6114E-12 | 8,7231E-11 | yes |
| AN11990 | ChrI_A_nidulans_FGSC_A4:3521598-3522063    | WT_5hasex | WT_veg | OK     | 13,3974  | 63,2495 | 2,2391        | -2,66271      | 0,00775132 | 0,0425013  | yes |
| AN11991 | ChrIV_A_nidulans_FGSC_A4:2124292-2125042   | WT_5hasex | WT_veg | OK     | 10,7625  | 22,0284 | 1,03335       | -1,49333      | 0,13535    | 0,354632   | no  |
| AN11992 | ChrIV_A_nidulans_FGSC_A4:2128366-2128785   | WT_5hasex | WT_veg | NOTEST | 0        | 0       | 0             | 0             | 1          | 1          | no  |
| AN11994 | ChrIV_A_nidulans_FGSC_A4:2258568-2261425   | WT_5hasex | WT_veg | OK     | 29,365   | 63,9436 | 1,1227        | -2,35103      | 0,0187213  | 0,084601   | no  |
| AN11995 | ChrIV_A_nidulans_FGSC_A4:2262028-2263063   | WT_5hasex | WT_veg | OK     | 24,4865  | 43,4494 | 0,827353      | -1,47705      | 0,139663   | 0,362004   | no  |
| AN11996 | ChrIV_A_nidulans_FGSC_A4:2275667-2276863   | WT_5hasex | WT_veg | OK     | 34,5885  | 83,2865 | 1,26779       | -2,31318      | 0,0207129  | 0,0915793  | no  |
| AN11998 | ChrIV_A_nidulans_FGSC_A4:2322276-2322659   | WT_5hasex | WT_veg | NOTEST | 0        | 0       | 0             | 0             | 1          | 1          | no  |
| AN11999 | ChrIV_A_nidulans_FGSC_A4:2374059-2374458   | WT_5hasex | WT_veg | OK     | 17,3484  | 19,1217 | 0,140405      | -0,190011     | 0,8493     | 0,94087    | no  |
| AN1200  | ChrVIII_A_nidulans_FGSC_A4:1214952-1218567 | WT_5hasex | WT_veg | OK     | 36,5795  | 170,844 | 2,22357       | -4,60763      | 4,0728E-06 | 6,4303E-05 | yes |
| AN12000 | ChrIV_A_nidulans_FGSC_A4:2405684-2407676   | WT_5hasex | WT_veg | OK     | 23,3376  | 25,579  | 0,132306      | -0,261554     | 0,793665   | 0,916031   | no  |
| AN12001 | ChrIV_A_nidulans_FGSC_A4:2407907-2408704   | WT_5hasex | WT_veg | OK     | 18,6501  | 42,7046 | 1,19521       | -1,97931      | 0,0477814  | 0,172176   | no  |
| AN12002 | ChrII_A_nidulans_FGSC_A4:150508-151419     | WT_5hasex | WT_veg | OK     | 7,32683  | 4,75688 | -0,623173     | 0,782365      | 0,434      | 0,699797   | no  |
| AN12003 | ChrII_A_nidulans_FGSC_A4:161790-162297     | WT_5hasex | WT_veg | OK     | 2,4309   | 0       | -1.79769e+308 | -1.79769e+308 | 0,0368957  | 0,142098   | no  |
| AN12004 | ChrII_A_nidulans_FGSC_A4:215091-216972     | WT_5hasex | WT_veg | NOTEST | 1,26463  | 2,98871 | 1,2408        | -1,11056      | 0,266758   | 1          | no  |
| AN12007 | ChrII_A_nidulans_FGSC_A4:286370-286853     | WT_5hasex | WT_veg | OK     | 0        | 4,80367 | 1.79769e+308  | 1.79769e+308  | 0,036343   | 0,140531   | no  |
| AN12008 | ChrII_A_nidulans_FGSC_A4:355826-356483     | WT_5hasex | WT_veg | NOTEST | 0,509485 | 1,01015 | 0,987455      | -0,53136      | 0,595169   | 1          | no  |
| AN12009 | ChrI_A_nidulans_FGSC_A4:2511378-2511889    | WT_5hasex | WT_veg | OK     | 0,622865 | 4,89459 | 2,9742        | -1,44042      | 0,149749   | 0,378577   | no  |
| AN1201  | ChrVIII_A_nidulans_FGSC_A4:1212520-1214114 | WT_5hasex | WT_veg | OK     | 37,1593  | 58,4101 | 0,652494      | -1,32443      | 0,185359   | 0,434148   | no  |
| AN12010 | ChrI_A_nidulans_FGSC_A4:2544945-2547226    | WT_5hasex | WT_veg | OK     | 3,01535  | 8,2764  | 1,45668       | -1,71575      | 0,0862084  | 0,261502   | no  |
| AN12011 | ChrI_A_nidulans_FGSC_A4:2566669-2567280    | WT_5hasex | WT_veg | OK     | 34,0498  | 42,3938 | 0,316207      | -0,55251      | 0,580599   | 0,801399   | no  |
| AN12012 | ChrI_A_nidulans_FGSC_A4:2691580-2693089    | WT_5hasex | WT_veg | NOTEST | 0        | 0       | 0             | 0             | 1          | 1          | no  |
| AN12013 | ChrI_A_nidulans_FGSC_A4:2791363-2793137    | WT_5hasex | WT_veg | NOTEST | 0        | 1,81245 | 1.79769e+308  | 1.79769e+308  | 0,0120369  | 1          | no  |
| AN12015 | ChrI_A_nidulans_FGSC_A4:1427184-1427952    | WT_5hasex | WT_veg | OK     | 8,53493  | 14,9403 | 0,807759      | -1,06239      | 0,28806    | 0,562488   | no  |
| AN12016 | ChrI_A_nidulans_FGSC_A4:1414500-1415326    | WT_5hasex | WT_veg | OK     | 5,34096  | 15,316  | 1,51987       | -1,74166      | 0,0815684  | 0,251082   | no  |
| AN12017 | ChrI_A_nidulans_FGSC_A4:1355036-1357737    | WT_5hasex | WT_veg | OK     | 66,9896  | 164,553 | 1,29654       | -2,68299      | 0,00729661 | 0,0404825  | yes |
| AN12018 | ChrI_A_nidulans_FGSC_A4:1275300-1275609    | WT_5hasex | WT_veg | OK     | 3,23691  | 3,93859 | 0,283061      | -0,21768      | 0,827679   | 0,931389   | no  |
| AN12019 | ChrI_A_nidulans_FGSC_A4:1171844-1172190    | WT_5hasex | WT_veg | NOTEST | 0        | 0       | 0             | 0             | 1          | 1          | no  |
| AN1202  | ChrVIII_A_nidulans_FGSC_A4:1211412-1211994 | WT_5hasex | WT_veg | OK     | 14,2197  | 34,9224 | 1,29626       | -1,81495      | 0,069532   | 0,224444   | no  |
| AN12020 | ChrI_A_nidulans_FGSC_A4:1169965-1170478    | WT_5hasex | WT_veg | NOTEST | 0        | 0       | 0             | 0             | 1          | 1          | no  |
| AN12021 | ChrIII_A_nidulans_FGSC_A4:3470197-3470869  | WT_5hasex | WT_veg | NOTEST | 0        | 0       | 0             | 0             | 1          | 1          | no  |
| AN12022 | ChrIII_A_nidulans_FGSC_A4:3435511-3436839  | WT_5hasex | WT_veg | OK     | 10,5154  | 16,2064 | 0,624052      | -1,02033      | 0,307573   | 0,583658   | no  |
| AN12023 | ChrIII_A_nidulans_FGSC_A4:3434343-3434574  | WT_5hasex | WT_veg | OK     | 3,41174  | 0       | -1.79769e+308 | -1.79769e+308 | 0,0966285  | 0,282374   | no  |
| AN12026 | ChrIII_A_nidulans_FGSC_A4:3321128-3321341  | WT_5hasex | WT_veg | OK     | 9,71794  | 9,20915 | -0,0775824    | 0,0607822     | 0,951533   | 0,982116   | no  |
| AN12027 | ChrIII_A_nidulans_FGSC_A4:3299432-3300884  | WT_5hasex | WT_veg | OK     | 70,4772  | 161,997 | 1,20074       | -2,0069       | 0,0447606  | 0,163955   | no  |
| AN12028 | ChrIII_A_nidulans_FGSC_A4:3228270-3229123  | WT_5hasex | WT_veg | NOTEST | 1,94529  | 0       | -1.79769e+308 | -1.79769e+308 | 0,0399057  | 1          | no  |
| AN12029 | ChrIII_A_nidulans_FGSC_A4:3216214-3217636  | WT_5hasex | WT_veg | OK     | 59,8696  | 65,8566 | 0,137503      | -0,283199     | 0,777024   | 0,908721   | no  |
| AN1203  | ChrVIII_A_nidulans_FGSC_A4:1204832-1205781 | WT_5hasex | WT_veg | NOTEST | 0,636714 | 3,68256 | 2,53199       | -1,90936      | 0,0562161  | 1          | no  |
| AN12030 | ChrIII_A_nidulans_FGSC_A4:3214092-3214612  | WT_5hasex | WT_veg | OK     | 2,62621  | 2,11137 | -0,314805     | 0,206123      | 0,836695   | 0,935089   | no  |
| AN12031 | ChrIII_A_nidulans_FGSC_A4:3207009-3207407  | WT_5hasex | WT_veg | OK     | 3,13613  | 2,82107 | -0,152743     | 0,102816      | 0,918109   | 0,968779   | no  |
| AN12032 | ChrV_A_nidulans_FGSC_A4:1418917-1420261    | WT_5hasex | WT_veg | OK     | 2,62285  | 5,89445 | 1,16822       | -1,51974      | 0,128576   | 0,342813   | no  |
| AN12033 | ChrV_A_nidulans_FGSC_A4:1420677-1421718    | WT_5hasex | WT_veg | OK     | 9,16916  | 10,2247 | 0,157197      | -0,233076     | 0,815702   | 0,926186   | no  |
| AN12034 | ChrV_A_nidulans_FGSC_A4:1473759-1474789    | WT_5hasex | WT_veg | OK     | 2,30824  | 1,35628 | -0,767138     | 0,511474      | 0,609019   | 0,818582   | no  |
| AN12035 | ChrV_A_nidulans_FGSC_A4:1599496-1605059    | WT_5hasex | WT_veg | OK     | 2,87776  | 14,128  | 2,29554       | -2,58406      | 0,00976458 | 0,0511223  | no  |
| AN12036 | ChrIV_A_nidulans_FGSC_A4:185550-186116     | WT_5hasex | WT_veg | NOTEST | 1,79462  | 3,12133 | 0,798486      | -0,575659     | 0,564845   | 1          | no  |
| AN12037 | ChrIV_A_nidulans_FGSC_A4:31347-32468       | WT_5hasex | WT_veg | NOTEST | 0        | 0       | 0             | 0             | 1          | 1          | no  |
| AN12038 | ChrII_A_nidulans_FGSC_A4:2480825-2481146   | WT_5hasex | WT_veg | NOTEST | 0        | 0       | 0             | 0             | 1          | 1          | no  |
| AN12039 | ChrII_A_nidulans_FGSC_A4:2477470-2478364   | WT_5hasex | WT_veg | NOTEST | 1,49692  | 0       | -1.79769e+308 | -1.79769e+308 | 0,061123   | 1          | no  |
| AN1204  | ChrVIII_A_nidulans_FGSC_A4:1202132-1202696 | WT_5hasex | WT_veg | OK     | 179,646  | 496,017 | 1,46523       | -2,89434      | 0,00379961 | 0,023811   | yes |
| AN12040 | ChrII_A_nidulans_FGSC_A4:2455010-2455868   | WT_5hasex | WT_veg | NOTEST | 0        | 0       | 0             | 0             | 1          | 1          | no  |
| AN12041 | ChrII_A_nidulans_FGSC_A4:2417408-2417624   | WT_5hasex | WT_veg | NOTEST | 0        | 0       | 0             | 0             | 1          | 1          | no  |

## Supplementary table 1

|         |                                            |           |        |        |          |          |               |               |            |            |     |
|---------|--------------------------------------------|-----------|--------|--------|----------|----------|---------------|---------------|------------|------------|-----|
| AN12042 | ChrII_A_nidulans_FGSC_A4:2338481-2339868   | WT_5hasex | WT_veg | OK     | 7,62946  | 26,3185  | 1,78643       | -2,80015      | 0,00510784 | 0,030251   | yes |
| AN12044 | ChrI_A_nidulans_FGSC_A4:1117254-1117803    | WT_5hasex | WT_veg | OK     | 58,8997  | 52,4151  | -0,168278     | 0,312426      | 0,754717   | 0,898163   | no  |
| AN12045 | ChrI_A_nidulans_FGSC_A4:1100141-1100465    | WT_5hasex | WT_veg | OK     | 16,5287  | 22,7313  | 0,459705      | -0,629266     | 0,529175   | 0,768956   | no  |
| AN12046 | ChrI_A_nidulans_FGSC_A4:1080288-1081013    | WT_5hasex | WT_veg | NOTEST | 0,353297 | 1,29515  | 1,87416       | -0,824413     | 0,409705   | 1          | no  |
| AN12047 | ChrI_A_nidulans_FGSC_A4:1077114-1079404    | WT_5hasex | WT_veg | NOTEST | 0        | 0,324693 | 1.79769e+308  | 1.79769e+308  | 0,134707   | 1          | no  |
| AN12048 | ChrI_A_nidulans_FGSC_A4:998210-998729      | WT_5hasex | WT_veg | OK     | 4,1299   | 12,6221  | 1,61177       | -1,74586      | 0,080835   | 0,249538   | no  |
| AN12049 | ChrI_A_nidulans_FGSC_A4:997010-998099      | WT_5hasex | WT_veg | OK     | 35,2949  | 38,7302  | 0,134001      | -0,252143     | 0,80093    | 0,919698   | no  |
| AN1205  | ChrVIII_A_nidulans_FGSC_A4:1199333-1200049 | WT_5hasex | WT_veg | OK     | 30,8387  | 27,2767  | -0,177073     | 0,297179      | 0,76633    | 0,903939   | no  |
| AN12050 | ChrI_A_nidulans_FGSC_A4:996266-996788      | WT_5hasex | WT_veg | OK     | 64,3557  | 89,2651  | 0,472029      | -0,87541      | 0,381351   | 0,65565    | no  |
| AN12051 | ChrI_A_nidulans_FGSC_A4:963582-964130      | WT_5hasex | WT_veg | OK     | 2,65705  | 5,22494  | 0,975591      | -0,932952     | 0,350845   | 0,626532   | no  |
| AN12052 | ChrI_A_nidulans_FGSC_A4:957302-958425      | WT_5hasex | WT_veg | OK     | 6,45246  | 18,1136  | 1,48915       | -2,23028      | 0,025729   | 0,10787    | no  |
| AN12053 | ChrI_A_nidulans_FGSC_A4:941431-941890      | WT_5hasex | WT_veg | OK     | 9,07394  | 9,29591  | 0,0348684     | -0,0404843    | 0,967707   | 0,988187   | no  |
| AN12055 | ChrI_A_nidulans_FGSC_A4:876568-878696      | WT_5hasex | WT_veg | OK     | 1,96805  | 1,03149  | -0,93203      | 0,422283      | 0,672818   | 0,854031   | no  |
| AN12056 | ChrVII_A_nidulans_FGSC_A4:768926-770138    | WT_5hasex | WT_veg | OK     | 37,118   | 155,868  | 2,07013       | -3,99381      | 6,5019E-05 | 0,00075312 | yes |
| AN12057 | ChrIV_A_nidulans_FGSC_A4:1435522-1437901   | WT_5hasex | WT_veg | OK     | 54,5634  | 248,878  | 2,18943       | -4,5536       | 5,2736E-06 | 8,1278E-05 | yes |
| AN12058 | ChrIV_A_nidulans_FGSC_A4:1430221-1432565   | WT_5hasex | WT_veg | OK     | 18,0636  | 70,5602  | 1,96577       | -3,90054      | 9,5978E-05 | 0,0010575  | yes |
| AN12059 | ChrIV_A_nidulans_FGSC_A4:1418549-1419400   | WT_5hasex | WT_veg | OK     | 9,73668  | 19,8302  | 1,0262        | -1,46526      | 0,14285    | 0,367356   | no  |
| AN1206  | ChrVIII_A_nidulans_FGSC_A4:1197494-1199035 | WT_5hasex | WT_veg | NOTEST | 0,831601 | 0,99304  | 0,25596       | -0,199243     | 0,842073   | 1          | no  |
| AN12060 | ChrIV_A_nidulans_FGSC_A4:1368486-1370056   | WT_5hasex | WT_veg | OK     | 12,7726  | 16,4835  | 0,367967      | -0,624398     | 0,532366   | 0,771303   | no  |
| AN12061 | ChrIV_A_nidulans_FGSC_A4:1329617-1332058   | WT_5hasex | WT_veg | NOTEST | 0        | 0,254689 | 1.79769e+308  | 1.79769e+308  | 0,239374   | 1          | no  |
| AN12062 | ChrIV_A_nidulans_FGSC_A4:1313116-1314178   | WT_5hasex | WT_veg | OK     | 60,7933  | 81,0291  | 0,414529      | -0,76345      | 0,445195   | 0,708548   | no  |
| AN12063 | ChrIV_A_nidulans_FGSC_A4:1295772-1296869   | WT_5hasex | WT_veg | NOTEST | 0,981467 | 3,64793  | 1,89407       | -1,70957      | 0,0873458  | 1          | no  |
| AN12064 | ChrIV_A_nidulans_FGSC_A4:1293106-1293810   | WT_5hasex | WT_veg | NOTEST | 0,732773 | 1,3149   | 0,843519      | -0,494717     | 0,6208     | 1          | no  |
| AN12065 | ChrIV_A_nidulans_FGSC_A4:1288230-1289404   | WT_5hasex | WT_veg | NOTEST | 1,16545  | 0        | -1.79769e+308 | -1.79769e+308 | 0,0374675  | 1          | no  |
| AN12066 | ChrIV_A_nidulans_FGSC_A4:1285581-1287658   | WT_5hasex | WT_veg | NOTEST | 0,138806 | 0        | -1.79769e+308 | -1.79769e+308 | 0,224063   | 1          | no  |
| AN12067 | ChrIV_A_nidulans_FGSC_A4:1274132-1274435   | WT_5hasex | WT_veg | OK     | 3,2293   | 9,86178  | 1,61063       | -1,444        | 0,148738   | 0,376858   | no  |
| AN1207  | ChrVIII_A_nidulans_FGSC_A4:1193780-1196343 | WT_5hasex | WT_veg | OK     | 7,74968  | 15,9008  | 1,03689       | -1,84473      | 0,0650765  | 0,214064   | no  |
| AN12070 | ChrIV_A_nidulans_FGSC_A4:1233029-1234965   | WT_5hasex | WT_veg | OK     | 125,432  | 67,6685  | -0,890343     | 1,80927       | 0,0704098  | 0,226565   | no  |
| AN12072 | ChrIV_A_nidulans_FGSC_A4:1208749-1210621   | WT_5hasex | WT_veg | OK     | 28,6709  | 52,4386  | 0,871042      | -1,77853      | 0,0753166  | 0,237441   | no  |
| AN12074 | ChrVIII_A_nidulans_FGSC_A4:3905884-3907470 | WT_5hasex | WT_veg | OK     | 8,42652  | 17,9417  | 1,09031       | -1,77162      | 0,0764568  | 0,240039   | no  |
| AN12075 | ChrVIII_A_nidulans_FGSC_A4:3864357-3864750 | WT_5hasex | WT_veg | NOTEST | 0        | 0        | 0             | 0             | 1          | 1          | no  |
| AN12077 | ChrIII_A_nidulans_FGSC_A4:2964598-2965140  | WT_5hasex | WT_veg | NOTEST | 0,758202 | 0        | -1.79769e+308 | -1.79769e+308 | 0,23809    | 1          | no  |
| AN12078 | ChrIII_A_nidulans_FGSC_A4:2952850-2956968  | WT_5hasex | WT_veg | OK     | 0        | 7,8625   | 1.79769e+308  | 1.79769e+308  | 0,00489369 | 0,0292338  | yes |
| AN1208  | ChrVIII_A_nidulans_FGSC_A4:1191944-1193670 | WT_5hasex | WT_veg | OK     | 22,2075  | 65,1035  | 1,55169       | -3,04999      | 0,00228845 | 0,0156064  | yes |
| AN12080 | ChrIII_A_nidulans_FGSC_A4:2876369-2876745  | WT_5hasex | WT_veg | OK     | 5,64012  | 13,5402  | 1,26345       | -1,37694      | 0,16853    | 0,408536   | no  |
| AN12082 | ChrIII_A_nidulans_FGSC_A4:2833546-2835297  | WT_5hasex | WT_veg | OK     | 0,52103  | 8,04539  | 3,94873       | -4,14057      | 3,4644E-05 | 0,00043496 | yes |
| AN12083 | ChrIV_A_nidulans_FGSC_A4:2566609-2570120   | WT_5hasex | WT_veg | NOTEST | 0        | 0        | 0             | 0             | 1          | 1          | no  |
| AN12084 | ChrIV_A_nidulans_FGSC_A4:2627025-2628218   | WT_5hasex | WT_veg | OK     | 745,566  | 3140,25  | 2,07447       | -3,54732      | 0,00038917 | 0,00351007 | yes |
| AN12085 | ChrIV_A_nidulans_FGSC_A4:2638972-2639537   | WT_5hasex | WT_veg | OK     | 213,225  | 1522,54  | 2,83603       | -5,89569      | 3,7311E-09 | 1,1778E-07 | yes |
| AN12086 | ChrIV_A_nidulans_FGSC_A4:2699188-2702650   | WT_5hasex | WT_veg | OK     | 9,93971  | 2,38215  | -2,06094      | 1,60063       | 0,109458   | 0,308329   | no  |
| AN12087 | ChrIV_A_nidulans_FGSC_A4:2709211-2709804   | WT_5hasex | WT_veg | OK     | 3,94716  | 13,2993  | 1,75246       | -1,98037      | 0,0476618  | 0,171869   | no  |
| AN12088 | ChrIV_A_nidulans_FGSC_A4:2710082-2711681   | WT_5hasex | WT_veg | OK     | 26,1753  | 217,786  | 3,05663       | -5,41975      | 5,9683E-08 | 1,4656E-06 | yes |
| AN12089 | ChrIV_A_nidulans_FGSC_A4:2743143-2743518   | WT_5hasex | WT_veg | NOTEST | 0        | 0        | 0             | 0             | 1          | 1          | no  |
| AN1209  | ChrVIII_A_nidulans_FGSC_A4:1190738-1191749 | WT_5hasex | WT_veg | OK     | 39,6299  | 65,34    | 0,721375      | -1,3506       | 0,176825   | 0,42166    | no  |
| AN12090 | ChrIV_A_nidulans_FGSC_A4:2748362-2749731   | WT_5hasex | WT_veg | NOTEST | 0        | 0        | 0             | 0             | 1          | 1          | no  |
| AN12093 | ChrII_A_nidulans_FGSC_A4:2087041-2088768   | WT_5hasex | WT_veg | NOTEST | 0,262511 | 0,769922 | 1,55234       | -0,973305     | 0,330402   | 1          | no  |
| AN12094 | ChrII_A_nidulans_FGSC_A4:2085757-2086614   | WT_5hasex | WT_veg | OK     | 30,2356  | 24,4439  | -0,306773     | 0,538943      | 0,589926   | 0,807094   | no  |
| AN12095 | ChrII_A_nidulans_FGSC_A4:2043171-2043750   | WT_5hasex | WT_veg | NOTEST | 1,62799  | 2,57739  | 0,662813      | -0,42233      | 0,672784   | 1          | no  |
| AN12096 | ChrII_A_nidulans_FGSC_A4:2004043-2004423   | WT_5hasex | WT_veg | NOTEST | 0        | 0        | 0             | 0             | 1          | 1          | no  |
| AN12098 | ChrII_A_nidulans_FGSC_A4:1969415-1970357   | WT_5hasex | WT_veg | OK     | 3,05058  | 15,2127  | 2,31812       | -3,05356      | 0,00226143 | 0,0154741  | yes |
| AN12099 | ChrII_A_nidulans_FGSC_A4:1964858-1965441   | WT_5hasex | WT_veg | NOTEST | 1,44059  | 1,72782  | 0,262295      | -0,159115     | 0,873578   | 1          | no  |
| AN1210  | ChrVIII_A_nidulans_FGSC_A4:1187672-1190560 | WT_5hasex | WT_veg | OK     | 15,6608  | 30,0405  | 0,939748      | -1,8745       | 0,060862   | 0,204324   | no  |
| AN12100 | ChrII_A_nidulans_FGSC_A4:1952778-1953772   | WT_5hasex | WT_veg | OK     | 43,6648  | 111,256  | 1,34934       | -2,16805      | 0,0301547  | 0,12179    | no  |



## Supplementary table 1

|         |                                            |           |        |        |          |          |               |               |            |            |      |
|---------|--------------------------------------------|-----------|--------|--------|----------|----------|---------------|---------------|------------|------------|------|
| AN12101 | ChrII_A_nidulans_FGSC_A4:1951004-1952218   | WT_5hasex | WT_veg | OK     | 24,5637  | 56,9735  | 1,21376       | -2,30298      | 0,0212802  | 0,0934823  | no   |
| AN12102 | ChrII_A_nidulans_FGSC_A4:1865795-1866803   | WT_5hasex | WT_veg | OK     | 89,9468  | 334,532  | 1,895         | -3,38129      | 0,00072147 | 0,00594725 | yes  |
| AN12103 | ChrII_A_nidulans_FGSC_A4:1781831-1783049   | WT_5hasex | WT_veg | NOTEST | 1,04736  | 0        | -1.79769e+308 | -1.79769e+308 | 0,107729   | 0          | 1 no |
| AN12104 | ChrII_A_nidulans_FGSC_A4:1731763-1733868   | WT_5hasex | WT_veg | OK     | 78,5059  | 135,711  | 0,789665      | -1,62298      | 0,104594   | 0,298836   | no   |
| AN12105 | ChrII_A_nidulans_FGSC_A4:1729727-1731112   | WT_5hasex | WT_veg | OK     | 49,5705  | 111,798  | 1,17334       | -2,42175      | 0,0154461  | 0,0731301  | no   |
| AN12106 | ChrII_A_nidulans_FGSC_A4:1643483-1644133   | WT_5hasex | WT_veg | OK     | 20,1902  | 68,1124  | 1,75426       | -2,75485      | 0,00587196 | 0,0338954  | yes  |
| AN12109 | ChrVIII_A_nidulans_FGSC_A4:2425309-2425526 | WT_5hasex | WT_veg | OK     | 3,9252   | 0        | -1.79769e+308 | -1.79769e+308 | 0,133588   | 0,35179    | no   |
| AN12111 | ChrVIII_A_nidulans_FGSC_A4:1185716-1187430 | WT_5hasex | WT_veg | OK     | 60,9996  | 89,6249  | 0,5551        | -1,1524       | 0,249158   | 0,517288   | no   |
| AN12110 | ChrVIII_A_nidulans_FGSC_A4:2379444-2379956 | WT_5hasex | WT_veg | OK     | 13,6283  | 22,082   | 0,696266      | -1,00421      | 0,315278   | 0,591456   | no   |
| AN12111 | ChrVIII_A_nidulans_FGSC_A4:2377243-2377396 | WT_5hasex | WT_veg | NOTEST | 0        | 0        | 0             | 0             | 0          | 1          | 1 no |
| AN12112 | ChrVIII_A_nidulans_FGSC_A4:2321064-2321895 | WT_5hasex | WT_veg | OK     | 28,0929  | 65,0289  | 1,21087       | -2,05354      | 0,0400207  | 0,15087    | no   |
| AN12113 | ChrVIII_A_nidulans_FGSC_A4:2317967-2319481 | WT_5hasex | WT_veg | NOTEST | 0,636651 | 1,78187  | 1,48482       | -1,3594       | 0,174021   | 1          | 1 no |
| AN12114 | ChrVII_A_nidulans_FGSC_A4:3780061-3780539  | WT_5hasex | WT_veg | NOTEST | 0        | 0        | 0             | 0             | 0          | 1          | 1 no |
| AN12115 | ChrVII_A_nidulans_FGSC_A4:3804673-3806420  | WT_5hasex | WT_veg | NOTEST | 0,135592 | 0        | -1.79769e+308 | -1.79769e+308 | 0,224063   | 1          | 1 no |
| AN12116 | ChrVII_A_nidulans_FGSC_A4:3807074-3808622  | WT_5hasex | WT_veg | NOTEST | 0,173668 | 0        | -1.79769e+308 | -1.79769e+308 | 0,224063   | 1          | 1 no |
| AN12119 | ChrVII_A_nidulans_FGSC_A4:3822324-3823038  | WT_5hasex | WT_veg | OK     | 218,356  | 40,2959  | -2,43798      | 4,49093       | 7,0912E-06 | 0,00010605 | yes  |
| AN1212  | ChrVIII_A_nidulans_FGSC_A4:1182971-1185209 | WT_5hasex | WT_veg | OK     | 17,5708  | 88,9727  | 2,34018       | -4,53289      | 5,8182E-06 | 8,8655E-05 | yes  |
| AN12120 | ChrVII_A_nidulans_FGSC_A4:3839406-3839796  | WT_5hasex | WT_veg | OK     | 60,0039  | 221,627  | 1,885         | -3,2852       | 0,00101912 | 0,00798143 | yes  |
| AN12121 | ChrI_A_nidulans_FGSC_A4:2336280-2336727    | WT_5hasex | WT_veg | OK     | 38,5058  | 39,0062  | 0,0186283     | -0,0289781    | 0,976882   | 0,99199    | no   |
| AN12122 | ChrI_A_nidulans_FGSC_A4:2396510-2397313    | WT_5hasex | WT_veg | OK     | 20,3909  | 18,2819  | -0,157511     | 0,255899      | 0,798029   | 0,918519   | no   |
| AN12123 | ChrVII_A_nidulans_FGSC_A4:3544294-3546460  | WT_5hasex | WT_veg | OK     | 2,19654  | 5,7125   | 1,37889       | -1,4115       | 0,158098   | 0,392451   | no   |
| AN12124 | ChrVII_A_nidulans_FGSC_A4:3569123-3571211  | WT_5hasex | WT_veg | OK     | 4,01867  | 7,38002  | 0,876905      | -1,22398      | 0,220962   | 0,482512   | no   |
| AN12125 | ChrVII_A_nidulans_FGSC_A4:3635351-3635838  | WT_5hasex | WT_veg | NOTEST | 0        | 0        | 0             | 0             | 0          | 1          | 1 no |
| AN12126 | ChrVII_A_nidulans_FGSC_A4:3640441-3642514  | WT_5hasex | WT_veg | OK     | 5,67063  | 6,6674   | 0,233613      | -0,366452     | 0,714027   | 0,877065   | no   |
| AN12127 | ChrVII_A_nidulans_FGSC_A4:3643004-3643935  | WT_5hasex | WT_veg | OK     | 48,2537  | 101,507  | 1,07287       | -2,06973      | 0,038478   | 0,146603   | no   |
| AN12128 | ChrVII_A_nidulans_FGSC_A4:199537-200572    | WT_5hasex | WT_veg | NOTEST | 1,14391  | 0        | -1.79769e+308 | -1.79769e+308 | 0,0315813  | 1          | 1 no |
| AN12129 | ChrVII_A_nidulans_FGSC_A4:196974-198605    | WT_5hasex | WT_veg | NOTEST | 0,56374  | 2,78862  | 2,30645       | -2,1055       | 0,0352481  | 1          | 1 no |
| AN1213  | ChrVIII_A_nidulans_FGSC_A4:1178567-1181922 | WT_5hasex | WT_veg | OK     | 13,0654  | 13,8006  | 0,0789775     | -0,149796     | 0,880926   | 0,95479    | no   |
| AN12130 | ChrVII_A_nidulans_FGSC_A4:65286-65976      | WT_5hasex | WT_veg | OK     | 1,33373  | 9,05972  | 2,764         | -2,78505      | 0,00535198 | 0,0313918  | yes  |
| AN12131 | ChrVII_A_nidulans_FGSC_A4:30917-31853      | WT_5hasex | WT_veg | NOTEST | 0        | 0        | 0             | 0             | 0          | 1          | 1 no |
| AN12132 | ChrVII_A_nidulans_FGSC_A4:26389-28389      | WT_5hasex | WT_veg | NOTEST | 0        | 0        | 0             | 0             | 0          | 1          | 1 no |
| AN12133 | ChrVII_A_nidulans_FGSC_A4:1081260-1084203  | WT_5hasex | WT_veg | NOTEST | 0,927419 | 0        | -1.79769e+308 | -1.79769e+308 | 0,0426694  | 1          | 1 no |
| AN12134 | ChrVII_A_nidulans_FGSC_A4:1095680-1096155  | WT_5hasex | WT_veg | OK     | 8,52706  | 27,7168  | 1,70064       | -2,30105      | 0,0213886  | 0,0937998  | no   |
| AN12135 | ChrVII_A_nidulans_FGSC_A4:1135209-1135444  | WT_5hasex | WT_veg | OK     | 71,274   | 121,161  | 0,765476      | -1,15343      | 0,248735   | 0,516821   | no   |
| AN12136 | ChrVII_A_nidulans_FGSC_A4:1150683-1151637  | WT_5hasex | WT_veg | OK     | 4,01985  | 13,094   | 1,70369       | -2,13938      | 0,0324052  | 0,12879    | no   |
| AN12137 | ChrVII_A_nidulans_FGSC_A4:1196206-1196546  | WT_5hasex | WT_veg | NOTEST | 1,78507  | 0        | -1.79769e+308 | -1.79769e+308 | 0,107729   | 1          | 1 no |
| AN12138 | ChrVII_A_nidulans_FGSC_A4:1302717-1305881  | WT_5hasex | WT_veg | NOTEST | 0,618566 | 1,61624  | 1,38564       | -1,24017      | 0,214913   | 1          | 1 no |
| AN12139 | ChrVI_A_nidulans_FGSC_A4:213424-214339     | WT_5hasex | WT_veg | NOTEST | 0        | 0        | 0             | 0             | 0          | 1          | 1 no |
| AN1214  | ChrVIII_A_nidulans_FGSC_A4:1176841-1177800 | WT_5hasex | WT_veg | NOTEST | 0,672654 | 0        | -1.79769e+308 | -1.79769e+308 | 0,224063   | 1          | 1 no |
| AN12140 | ChrVI_A_nidulans_FGSC_A4:154949-156549     | WT_5hasex | WT_veg | NOTEST | 0        | 0        | 0             | 0             | 0          | 1          | 1 no |
| AN12145 | ChrVI_A_nidulans_FGSC_A4:78968-80561       | WT_5hasex | WT_veg | NOTEST | 0        | 0        | 0             | 0             | 0          | 1          | 1 no |
| AN12146 | ChrVI_A_nidulans_FGSC_A4:45732-46029       | WT_5hasex | WT_veg | NOTEST | 0        | 0        | 0             | 0             | 0          | 1          | 1 no |
| AN12147 | ChrIV_A_nidulans_FGSC_A4:817489-817861     | WT_5hasex | WT_veg | OK     | 6,34842  | 6,9152   | 0,123375      | -0,124089     | 0,901245   | 0,962017   | no   |
| AN12148 | ChrIV_A_nidulans_FGSC_A4:814572-816960     | WT_5hasex | WT_veg | OK     | 5,88396  | 7,80972  | 0,408483      | -0,64705      | 0,5176     | 0,761694   | no   |
| AN12149 | ChrIV_A_nidulans_FGSC_A4:770762-772266     | WT_5hasex | WT_veg | OK     | 52,9296  | 179,825  | 1,76445       | -3,52764      | 0,00041929 | 0,00374112 | yes  |
| AN1215  | ChrVIII_A_nidulans_FGSC_A4:1174664-1176601 | WT_5hasex | WT_veg | OK     | 29,2224  | 177,795  | 2,60507       | -5,04588      | 4,5143E-07 | 9,0428E-06 | yes  |
| AN12150 | ChrIV_A_nidulans_FGSC_A4:753001-754115     | WT_5hasex | WT_veg | OK     | 2,75599  | 32,6069  | 3,56453       | -3,53213      | 0,00041223 | 0,00369007 | yes  |
| AN12151 | ChrIV_A_nidulans_FGSC_A4:750116-750696     | WT_5hasex | WT_veg | OK     | 10,8856  | 27,3897  | 1,33121       | -1,82015      | 0,0687359  | 0,222593   | no   |
| AN12152 | ChrIII_A_nidulans_FGSC_A4:2450569-2451745  | WT_5hasex | WT_veg | OK     | 22,9603  | 43,0105  | 0,90555       | -1,66612      | 0,095689   | 0,280677   | no   |
| AN12153 | ChrIII_A_nidulans_FGSC_A4:2333996-2335642  | WT_5hasex | WT_veg | NOTEST | 1,16973  | 1,52358  | 0,38129       | -0,363468     | 0,716255   | 1          | 1 no |
| AN12154 | ChrIII_A_nidulans_FGSC_A4:2331928-2333250  | WT_5hasex | WT_veg | NOTEST | 0,411066 | 0,185258 | -1,14983      | 0,361007      | 0,718094   | 1          | 1 no |
| AN12155 | ChrIII_A_nidulans_FGSC_A4:2295451-2295833  | WT_5hasex | WT_veg | OK     | 0        | 4,06174  | 1.79769e+308  | 1.79769e+308  | 0,123323   | 0,333265   | no   |
| AN12156 | ChrIII_A_nidulans_FGSC_A4:2258119-2259624  | WT_5hasex | WT_veg | OK     | 9,50547  | 6,28373  | -0,597137     | 0,923825      | 0,355577   | 0,631048   | no   |

## Supplementary table 1

|         |                                            |           |        |        |          |            |               |               |            |            |     |
|---------|--------------------------------------------|-----------|--------|--------|----------|------------|---------------|---------------|------------|------------|-----|
| AN12157 | ChrIII_A_nidulans_FGSC_A4:2252217-2255498  | WT_5hasex | WT_veg | NOTEST | 1,1578   | 0          | -1.79769e+308 | -1.79769e+308 | 0,0653486  | 1          | no  |
| AN12158 | ChrI_A_nidulans_FGSC_A4:1809179-1810862    | WT_5hasex | WT_veg | OK     | 7,88858  | 14,207     | 0,848766      | -1,42132      | 0,155225   | 0,387614   | no  |
| AN12159 | ChrI_A_nidulans_FGSC_A4:1807396-1808749    | WT_5hasex | WT_veg | OK     | 11,9484  | 20,2145    | 0,758581      | -1,29343      | 0,195864   | 0,448604   | no  |
| AN12160 | ChrI_A_nidulans_FGSC_A4:1775517-1776226    | WT_5hasex | WT_veg | OK     | 1,41022  | 4,90876    | 1,79944       | -1,58894      | 0,112073   | 0,312968   | no  |
| AN12161 | ChrI_A_nidulans_FGSC_A4:1758293-1759944    | WT_5hasex | WT_veg | OK     | 5,70025  | 14,6698    | 1,36375       | -2,09965      | 0,0357597  | 0,138868   | no  |
| AN12162 | ChrI_A_nidulans_FGSC_A4:1752595-1753503    | WT_5hasex | WT_veg | OK     | 11,3481  | 17,5897    | 0,632278      | -0,90809      | 0,363831   | 0,638702   | no  |
| AN12163 | ChrIII_A_nidulans_FGSC_A4:1550042-1551051  | WT_5hasex | WT_veg | OK     | 25,0056  | 14,9339    | -0,743664     | 1,28021       | 0,200471   | 0,455177   | no  |
| AN12164 | ChrIII_A_nidulans_FGSC_A4:1452751-1455473  | WT_5hasex | WT_veg | OK     | 54,08    | 131,797    | 1,28515       | -2,31978      | 0,0203527  | 0,0903451  | no  |
| AN12165 | ChrIII_A_nidulans_FGSC_A4:1385738-1386179  | WT_5hasex | WT_veg | OK     | 16,1998  | 47,9304    | 1,56496       | -2,29959      | 0,0214717  | 0,094061   | no  |
| AN12166 | ChrVI_A_nidulans_FGSC_A4:2891954-2892765   | WT_5hasex | WT_veg | OK     | 4,98845  | 14,4107    | 1,53047       | -1,99688      | 0,0458379  | 0,166875   | no  |
| AN12167 | ChrII_A_nidulans_FGSC_A4:2589310-2589910   | WT_5hasex | WT_veg | OK     | 28,3975  | 49,7068    | 0,807681      | -1,38866      | 0,164937   | 0,402937   | no  |
| AN12169 | ChrII_A_nidulans_FGSC_A4:944340-946173     | WT_5hasex | WT_veg | OK     | 82,3823  | 333,452    | 2,01707       | -4,00843      | 6,1123E-05 | 0,00071415 | yes |
| AN1217  | ChrVIII_A_nidulans_FGSC_A4:1165563-1167517 | WT_5hasex | WT_veg | OK     | 133,395  | 253,768    | 0,92781       | -1,79118      | 0,073264   | 0,232833   | no  |
| AN12170 | ChrII_A_nidulans_FGSC_A4:946541-946898     | WT_5hasex | WT_veg | OK     | 7,91005  | 16,0509    | 1,02089       | -1,25897      | 0,208041   | 0,465411   | no  |
| AN12171 | ChrII_A_nidulans_FGSC_A4:999810-1002123    | WT_5hasex | WT_veg | OK     | 43,2124  | 113,312    | 1,39078       | -2,66699      | 0,00765338 | 0,0420804  | yes |
| AN12172 | ChrII_A_nidulans_FGSC_A4:1002533-1005053   | WT_5hasex | WT_veg | OK     | 73,4448  | 86,5274    | 0,236496      | -0,484571     | 0,627981   | 0,828882   | no  |
| AN12173 | ChrII_A_nidulans_FGSC_A4:1044582-1046062   | WT_5hasex | WT_veg | OK     | 22,6049  | 39,4738    | 0,804257      | -1,48612      | 0,137248   | 0,357992   | no  |
| AN12174 | ChrII_A_nidulans_FGSC_A4:2921226-2921538   | WT_5hasex | WT_veg | OK     | 33,4979  | 49,8724    | 0,57417       | -0,800547     | 0,423394   | 0,691286   | no  |
| AN12175 | ChrII_A_nidulans_FGSC_A4:2855581-2856542   | WT_5hasex | WT_veg | NOTEST | 0,454048 | 0,00039982 | -10,1493      | 0,00291739    | 0,997672   | 1          | no  |
| AN12176 | ChrII_A_nidulans_FGSC_A4:2853497-2853876   | WT_5hasex | WT_veg | OK     | 0,770048 | 6,18162    | 3,00497       | -1,45532      | 0,145581   | 0,371897   | no  |
| AN12177 | ChrII_A_nidulans_FGSC_A4:2840577-2840975   | WT_5hasex | WT_veg | OK     | 28,717   | 151,689    | 2,40114       | -3,68043      | 0,00023284 | 0,00226959 | yes |
| AN12178 | ChrII_A_nidulans_FGSC_A4:2744986-2745946   | WT_5hasex | WT_veg | OK     | 1,25047  | 9,6275     | 2,94469       | -2,97135      | 0,00296491 | 0,0193604  | yes |
| AN12179 | ChrV_A_nidulans_FGSC_A4:1190656-1191553    | WT_5hasex | WT_veg | OK     | 12,1732  | 13,5323    | 0,152697      | -0,23722      | 0,812486   | 0,924734   | no  |
| AN1218  | ChrVIII_A_nidulans_FGSC_A4:1163625-1165036 | WT_5hasex | WT_veg | OK     | 21,1891  | 35,0876    | 0,727642      | -1,33315      | 0,182482   | 0,42983    | no  |
| AN12180 | ChrV_A_nidulans_FGSC_A4:1235936-1236258    | WT_5hasex | WT_veg | OK     | 47,4151  | 129,65     | 1,45121       | -2,24482      | 0,0247796  | 0,104655   | no  |
| AN12181 | ChrV_A_nidulans_FGSC_A4:1273326-1274827    | WT_5hasex | WT_veg | NOTEST | 0,152276 | 1,05705    | 2,79528       | -1,00741      | 0,313736   | 1          | no  |
| AN12183 | ChrVI_A_nidulans_FGSC_A4:1390865-1392196   | WT_5hasex | WT_veg | NOTEST | 0        | 0          | 0             | 0             | 1          | 1          | no  |
| AN12184 | ChrVI_A_nidulans_FGSC_A4:1375201-1375554   | WT_5hasex | WT_veg | NOTEST | 0        | 0          | 0             | 0             | 1          | 1          | no  |
| AN12185 | ChrVI_A_nidulans_FGSC_A4:1311248-1311806   | WT_5hasex | WT_veg | OK     | 1,53976  | 6,28478    | 2,02916       | -1,73873      | 0,082083   | 0,252202   | no  |
| AN12186 | ChrVI_A_nidulans_FGSC_A4:1309370-1310309   | WT_5hasex | WT_veg | NOTEST | 0        | 0          | 0             | 0             | 1          | 1          | no  |
| AN12187 | ChrVI_A_nidulans_FGSC_A4:1308155-1309000   | WT_5hasex | WT_veg | NOTEST | 0,257784 | 1,07451    | 2,05944       | -0,866326     | 0,386311   | 1          | no  |
| AN12188 | ChrVI_A_nidulans_FGSC_A4:1263713-1271743   | WT_5hasex | WT_veg | NOTEST | 0        | 0          | 0             | 0             | 1          | 1          | no  |
| AN12189 | ChrVIII_A_nidulans_FGSC_A4:1791473-1792112 | WT_5hasex | WT_veg | OK     | 19,9253  | 27,5912    | 0,469604      | -0,723384     | 0,469444   | 0,727694   | no  |
| AN1219  | ChrVIII_A_nidulans_FGSC_A4:1160309-1163027 | WT_5hasex | WT_veg | OK     | 31,467   | 33,1253    | 0,0740972     | -0,152751     | 0,878595   | 0,953679   | no  |
| AN12191 | ChrII_A_nidulans_FGSC_A4:4021092-4021394   | WT_5hasex | WT_veg | NOTEST | 0        | 0          | 0             | 0             | 1          | 1          | no  |
| AN12192 | ChrII_A_nidulans_FGSC_A4:3948089-3948527   | WT_5hasex | WT_veg | OK     | 14,088   | 24,8227    | 0,817192      | -1,09745      | 0,272443   | 0,544969   | no  |
| AN12193 | ChrII_A_nidulans_FGSC_A4:3946583-3947619   | WT_5hasex | WT_veg | NOTEST | 0,182051 | 1,05876    | 2,53997       | -1,42526      | 0,154082   | 1          | no  |
| AN12195 | ChrII_A_nidulans_FGSC_A4:3904088-3904601   | WT_5hasex | WT_veg | OK     | 1,12347  | 6,31149    | 2,49002       | -1,82946      | 0,0673301  | 0,219349   | no  |
| AN12197 | ChrVII_A_nidulans_FGSC_A4:3007531-3009114  | WT_5hasex | WT_veg | OK     | 17,0352  | 24,0823    | 0,499456      | -0,912069     | 0,361732   | 0,63639    | no  |
| AN12198 | ChrVII_A_nidulans_FGSC_A4:3092496-3093320  | WT_5hasex | WT_veg | OK     | 571,353  | 4966,41    | 3,11975       | -5,34406      | 9,0888E-08 | 2,1396E-06 | yes |
| AN12199 | ChrVII_A_nidulans_FGSC_A4:3130548-3132534  | WT_5hasex | WT_veg | OK     | 83,0471  | 43,1493    | -0,944594     | 1,63537       | 0,101971   | 0,293696   | no  |
| AN1220  | ChrVIII_A_nidulans_FGSC_A4:1152559-1153256 | WT_5hasex | WT_veg | OK     | 75,2466  | 147,731    | 0,973277      | -1,93483      | 0,0530107  | 0,184883   | no  |
| AN12201 | ChrII_A_nidulans_FGSC_A4:1266932-1267663   | WT_5hasex | WT_veg | OK     | 79,4659  | 136,083    | 0,776083      | -1,47016      | 0,141518   | 0,365006   | no  |
| AN12202 | ChrII_A_nidulans_FGSC_A4:1285511-1286849   | WT_5hasex | WT_veg | OK     | 1,92992  | 8,60131    | 2,15602       | -2,34268      | 0,0191456  | 0,0860806  | no  |
| AN12203 | ChrII_A_nidulans_FGSC_A4:1291569-1292931   | WT_5hasex | WT_veg | OK     | 19,3369  | 60,7476    | 1,65147       | -3,0673       | 0,00216003 | 0,0149028  | yes |
| AN12204 | ChrII_A_nidulans_FGSC_A4:1293340-1297675   | WT_5hasex | WT_veg | OK     | 8,42971  | 8,06365    | -0,0640512    | 0,125549      | 0,900089   | 0,961432   | no  |
| AN12205 | ChrII_A_nidulans_FGSC_A4:1299087-1299527   | WT_5hasex | WT_veg | OK     | 31,1022  | 51,0917    | 0,71607       | -1,11906      | 0,263116   | 0,533908   | no  |
| AN12206 | ChrII_A_nidulans_FGSC_A4:1311063-1312234   | WT_5hasex | WT_veg | OK     | 7,52314  | 72,3342    | 3,26527       | -5,06398      | 4,106E-07  | 8,2947E-06 | yes |
| AN12207 | ChrII_A_nidulans_FGSC_A4:1369979-1370915   | WT_5hasex | WT_veg | OK     | 64,0954  | 137,624    | 1,10244       | -2,22085      | 0,026361   | 0,109859   | no  |
| AN12208 | ChrII_A_nidulans_FGSC_A4:1405120-1406678   | WT_5hasex | WT_veg | OK     | 60,8883  | 126,422    | 1,05401       | -2,18134      | 0,0291582  | 0,118676   | no  |
| AN12209 | ChrVIII_A_nidulans_FGSC_A4:715103-717404   | WT_5hasex | WT_veg | OK     | 32,5961  | 131,154    | 2,00849       | -3,48744      | 0,00048767 | 0,0042584  | yes |
| AN1221  | ChrVIII_A_nidulans_FGSC_A4:1148211-1151109 | WT_5hasex | WT_veg | OK     | 5,55471  | 5,8008     | 0,062539      | -0,105435     | 0,916031   | 0,967955   | no  |
| AN12212 | ChrVIII_A_nidulans_FGSC_A4:2850234-2851325 | WT_5hasex | WT_veg | OK     | 22,1016  | 19,9367    | -0,148722     | 0,241797      | 0,808937   | 0,923371   | no  |

## Supplementary table 1

|         |                                            |           |        |        |          |          |               |               |            |            |     |
|---------|--------------------------------------------|-----------|--------|--------|----------|----------|---------------|---------------|------------|------------|-----|
| AN12213 | ChrVIII_A_nidulans_FGSC_A4:2791719-2792646 | WT_5hasex | WT_veg | OK     | 830,53   | 1399,93  | 0,753247      | -1,47198      | 0,141026   | 0,364238   | no  |
| AN12216 | ChrVIII_A_nidulans_FGSC_A4:2637039-2640269 | WT_5hasex | WT_veg | OK     | 19,4642  | 88,3634  | 2,18263       | -4,40414      | 1,0621E-05 | 0,00015161 | yes |
| AN12217 | ChrVIII_A_nidulans_FGSC_A4:2579412-2580815 | WT_5hasex | WT_veg | NOTEST | 0,740917 | 0,180935 | -2,03384      | 0,668434      | 0,503857   | 1          | no  |
| AN12218 | ChrVIII_A_nidulans_FGSC_A4:2571416-2571991 | WT_5hasex | WT_veg | OK     | 11,7676  | 20,7715  | 0,819783      | -1,19677      | 0,231396   | 0,495692   | no  |
| AN1222  | ChrVIII_A_nidulans_FGSC_A4:1145974-1147805 | WT_5hasex | WT_veg | OK     | 390,907  | 614,973  | 0,653699      | -1,22267      | 0,221455   | 0,483046   | no  |
| AN12220 | ChrVIII_A_nidulans_FGSC_A4:2478680-2480503 | WT_5hasex | WT_veg | OK     | 3,43608  | 4,58209  | 0,415241      | -0,309785     | 0,756724   | 0,899446   | no  |
| AN12221 | ChrIII_A_nidulans_FGSC_A4:1036067-1036865  | WT_5hasex | WT_veg | OK     | 94,866   | 368,314  | 1,95697       | -4,06226      | 4,8601E-05 | 0,00058426 | yes |
| AN12222 | ChrIII_A_nidulans_FGSC_A4:1034431-1035302  | WT_5hasex | WT_veg | NOTEST | 0        | 0        | 0             | 0             | 1          | 1          | no  |
| AN12223 | ChrIII_A_nidulans_FGSC_A4:1029076-1030149  | WT_5hasex | WT_veg | OK     | 193,269  | 369,926  | 0,936628      | -1,89121      | 0,0585962  | 0,198767   | no  |
| AN12224 | ChrIII_A_nidulans_FGSC_A4:1006429-1007470  | WT_5hasex | WT_veg | OK     | 2,38859  | 1,96403  | -0,282337     | 0,18457       | 0,853566   | 0,942667   | no  |
| AN12225 | ChrIII_A_nidulans_FGSC_A4:907459-908598    | WT_5hasex | WT_veg | NOTEST | 0,860141 | 1,03164  | 0,262295      | -0,159115     | 0,873578   | 1          | no  |
| AN12226 | ChrVIII_A_nidulans_FGSC_A4:4606123-4607675 | WT_5hasex | WT_veg | NOTEST | 0        | 0        | 0             | 0             | 1          | 1          | no  |
| AN12227 | ChrVIII_A_nidulans_FGSC_A4:4602479-4602917 | WT_5hasex | WT_veg | OK     | 45,4674  | 72,7848  | 0,678804      | -1,16234      | 0,245097   | 0,512718   | no  |
| AN12228 | ChrVIII_A_nidulans_FGSC_A4:4551857-4552763 | WT_5hasex | WT_veg | OK     | 2,40456  | 0        | -1.79769e+308 | -1.79769e+308 | 0,0908325  | 0,270621   | no  |
| AN12229 | ChrIII_A_nidulans_FGSC_A4:2139838-2140904  | WT_5hasex | WT_veg | OK     | 223,321  | 563,837  | 1,33616       | -2,70662      | 0,00679712 | 0,0382581  | yes |
| AN1223  | ChrVIII_A_nidulans_FGSC_A4:1144415-1145632 | WT_5hasex | WT_veg | OK     | 24,0967  | 48,8238  | 1,01875       | -1,90634      | 0,0566061  | 0,193751   | no  |
| AN12230 | ChrIII_A_nidulans_FGSC_A4:2099451-2099991  | WT_5hasex | WT_veg | OK     | 11,5827  | 17,5448  | 0,599068      | -0,825624     | 0,409017   | 0,678957   | no  |
| AN12232 | ChrVII_A_nidulans_FGSC_A4:3912274-3912586  | WT_5hasex | WT_veg | OK     | 47,8844  | 69,0904  | 0,528931      | -0,864934     | 0,387075   | 0,660529   | no  |
| AN12233 | ChrVII_A_nidulans_FGSC_A4:3972786-3973174  | WT_5hasex | WT_veg | OK     | 107,207  | 198,614  | 0,889573      | -1,64695      | 0,0995674  | 0,288405   | no  |
| AN12234 | ChrVII_A_nidulans_FGSC_A4:3998418-3998964  | WT_5hasex | WT_veg | OK     | 1,4837   | 8,80476  | 2,56908       | -2,58883      | 0,00963016 | 0,050555   | no  |
| AN12236 | ChrVII_A_nidulans_FGSC_A4:4015953-4017869  | WT_5hasex | WT_veg | OK     | 5,57848  | 19,0971  | 1,77541       | -2,88603      | 0,00390129 | 0,0242903  | yes |
| AN12238 | ChrVII_A_nidulans_FGSC_A4:540370-541771    | WT_5hasex | WT_veg | NOTEST | 0        | 0        | 0             | 0             | 1          | 1          | no  |
| AN12239 | ChrVII_A_nidulans_FGSC_A4:524079-527675    | WT_5hasex | WT_veg | OK     | 3,50576  | 5,29275  | 0,594292      | -0,800855     | 0,423216   | 0,691098   | no  |
| AN1224  | ChrVIII_A_nidulans_FGSC_A4:1143661-1144250 | WT_5hasex | WT_veg | OK     | 34,6728  | 81,8671  | 1,23948       | -2,15005      | 0,0315514  | 0,126239   | no  |
| AN12240 | ChrVII_A_nidulans_FGSC_A4:494806-495296    | WT_5hasex | WT_veg | OK     | 3,1329   | 1,57817  | -0,989247     | 0,64454       | 0,519225   | 0,762898   | no  |
| AN12241 | ChrIII_A_nidulans_FGSC_A4:3020039-3020573  | WT_5hasex | WT_veg | OK     | 49,8512  | 121,569  | 1,28608       | -2,33511      | 0,0195374  | 0,0875193  | no  |
| AN12244 | ChrIII_A_nidulans_FGSC_A4:2982530-2983921  | WT_5hasex | WT_veg | NOTEST | 0        | 0        | 0             | 0             | 1          | 1          | no  |
| AN12245 | ChrIV_A_nidulans_FGSC_A4:403518-403968     | WT_5hasex | WT_veg | NOTEST | 1,77822  | 0        | -1.79769e+308 | -1.79769e+308 | 0,0687549  | 1          | no  |
| AN12246 | ChrIV_A_nidulans_FGSC_A4:394593-395181     | WT_5hasex | WT_veg | OK     | 1134,5   | 1944,44  | 0,777305      | -1,52861      | 0,12636    | 0,338749   | no  |
| AN12249 | ChrIV_A_nidulans_FGSC_A4:1046561-1048581   | WT_5hasex | WT_veg | OK     | 11,0049  | 20,7853  | 0,917417      | -1,602        | 0,109156   | 0,307793   | no  |
| AN1225  | ChrVIII_A_nidulans_FGSC_A4:1138289-1139627 | WT_5hasex | WT_veg | OK     | 16,493   | 35,3876  | 1,10139       | -1,97879      | 0,0478392  | 0,172329   | no  |
| AN12250 | ChrIV_A_nidulans_FGSC_A4:948000-949124     | WT_5hasex | WT_veg | NOTEST | 0        | 0        | 0             | 0             | 1          | 1          | no  |
| AN12252 | ChrVI_A_nidulans_FGSC_A4:3083164-3083458   | WT_5hasex | WT_veg | OK     | 2,01806  | 8,08217  | 2,00177       | -1,4065       | 0,159575   | 0,394846   | no  |
| AN12253 | ChrVI_A_nidulans_FGSC_A4:3079473-3080032   | WT_5hasex | WT_veg | OK     | 2,26754  | 3,35502  | 0,565191      | -0,418075     | 0,675892   | 0,855809   | no  |
| AN12254 | ChrV_A_nidulans_FGSC_A4:795341-795936      | WT_5hasex | WT_veg | OK     | 7,21693  | 2,57851  | -1,48485      | 1,30737       | 0,191088   | 0,442054   | no  |
| AN12255 | ChrV_A_nidulans_FGSC_A4:796212-797183      | WT_5hasex | WT_veg | OK     | 12,086   | 24,7556  | 1,03442       | -1,66143      | 0,0966266  | 0,282374   | no  |
| AN12256 | ChrV_A_nidulans_FGSC_A4:808618-811868      | WT_5hasex | WT_veg | OK     | 20,1767  | 35,0486  | 0,796668      | -1,50797      | 0,131563   | 0,347961   | no  |
| AN12257 | ChrV_A_nidulans_FGSC_A4:850486-850869      | WT_5hasex | WT_veg | NOTEST | 0,921112 | 0        | -1.79769e+308 | -1.79769e+308 | 0,137528   | 1          | no  |
| AN12258 | ChrV_A_nidulans_FGSC_A4:880281-882816      | WT_5hasex | WT_veg | NOTEST | 1,85876  | 3,03477  | 0,707244      | -0,859905     | 0,389842   | 1          | no  |
| AN12259 | ChrV_A_nidulans_FGSC_A4:890890-891103      | WT_5hasex | WT_veg | NOTEST | 1,13969  | 0        | -1.79769e+308 | -1.79769e+308 | 0,165569   | 1          | no  |
| AN1226  | ChrVIII_A_nidulans_FGSC_A4:1136202-1138054 | WT_5hasex | WT_veg | OK     | 28,7157  | 53,6346  | 0,901322      | -1,82284      | 0,0683274  | 0,221675   | no  |
| AN12260 | ChrV_A_nidulans_FGSC_A4:903854-904244      | WT_5hasex | WT_veg | OK     | 10,5541  | 24,203   | 1,19738       | -1,57152      | 0,116063   | 0,320156   | no  |
| AN12261 | ChrI_A_nidulans_FGSC_A4:1647545-1648228    | WT_5hasex | WT_veg | OK     | 6,06505  | 26,9572  | 2,15208       | -2,90682      | 0,00365127 | 0,0230328  | yes |
| AN12262 | ChrI_A_nidulans_FGSC_A4:1537031-1537520    | WT_5hasex | WT_veg | OK     | 8,28735  | 11,3074  | 0,44828       | -0,511294     | 0,609145   | 0,818637   | no  |
| AN12263 | ChrIII_A_nidulans_FGSC_A4:2063346-2065921  | WT_5hasex | WT_veg | NOTEST | 0,249427 | 0        | -1.79769e+308 | -1.79769e+308 | 0,304271   | 1          | no  |
| AN12264 | ChrIII_A_nidulans_FGSC_A4:2055565-2056569  | WT_5hasex | WT_veg | OK     | 38,1798  | 15,9313  | -1,26095      | 2,31588       | 0,0205648  | 0,09109    | no  |
| AN12265 | ChrIII_A_nidulans_FGSC_A4:2015151-2015881  | WT_5hasex | WT_veg | NOTEST | 0,406852 | 0        | -1.79769e+308 | -1.79769e+308 | 0,224063   | 1          | no  |
| AN12267 | ChrIV_A_nidulans_FGSC_A4:628295-629766     | WT_5hasex | WT_veg | OK     | 5,5492   | 5,10733  | -0,119711     | 0,159735      | 0,87309    | 0,951384   | no  |
| AN12268 | ChrIV_A_nidulans_FGSC_A4:568369-570473     | WT_5hasex | WT_veg | OK     | 2,42709  | 1,48247  | -0,711225     | 0,327645      | 0,74318    | 0,891991   | no  |
| AN12269 | ChrVIII_A_nidulans_FGSC_A4:4750298-4751980 | WT_5hasex | WT_veg | OK     | 2,12488  | 7,0254   | 1,7252        | -2,07424      | 0,0380574  | 0,145345   | no  |
| AN1227  | ChrVIII_A_nidulans_FGSC_A4:1131583-1135018 | WT_5hasex | WT_veg | OK     | 17,3072  | 24,2115  | 0,484322      | -0,963154     | 0,33547    | 0,611513   | no  |
| AN12270 | ChrVIII_A_nidulans_FGSC_A4:4744167-4744366 | WT_5hasex | WT_veg | NOTEST | 2,0254   | 1,5934   | -0,346098     | 0,0996137     | 0,920651   | 1          | no  |
| AN12271 | ChrI_A_nidulans_FGSC_A4:3573771-3574735    | WT_5hasex | WT_veg | OK     | 99,5476  | 166,138  | 0,738926      | -1,49166      | 0,135788   | 0,35537    | no  |

## Supplementary table 1

|         |                                            |           |        |        |          |          |               |               |            |            |      |
|---------|--------------------------------------------|-----------|--------|--------|----------|----------|---------------|---------------|------------|------------|------|
| AN12272 | ChrI_A_nidulans_FGSC_A4:3575661-3575960    | WT_5hasex | WT_veg | OK     | 65,9621  | 111,061  | 0,751647      | -1,24799      | 0,212035   | 0,470947   | no   |
| AN12273 | ChrI_A_nidulans_FGSC_A4:3631392-3632082    | WT_5hasex | WT_veg | NOTEST | 1,60824  | 3,40222  | 1,08099       | -0,930541     | 0,352091   |            | 1 no |
| AN12276 | ChrI_A_nidulans_FGSC_A4:3675676-3676832    | WT_5hasex | WT_veg | NOTEST | 0,425405 | 2,91104  | 2,77463       | -1,34377      | 0,179024   |            | 1 no |
| AN12277 | ChrVII_A_nidulans_FGSC_A4:437059-438494    | WT_5hasex | WT_veg | OK     | 0,138087 | 4,50668  | 5,02842       | -3,27181      | 0,00106862 | 0,00829103 | yes  |
| AN12279 | ChrIII_A_nidulans_FGSC_A4:60182-64500      | WT_5hasex | WT_veg | OK     | 3,43136  | 1,92726  | -0,832232     | 1,3148        | 0,188577   | 0,438608   | no   |
| AN1228  | ChrVIII_A_nidulans_FGSC_A4:1130116-1131186 | WT_5hasex | WT_veg | OK     | 1275,44  | 2199     | 0,785857      | -1,39396      | 0,163331   | 0,400265   | no   |
| AN12280 | ChrIII_A_nidulans_FGSC_A4:57863-59084      | WT_5hasex | WT_veg | OK     | 103,74   | 60,4759  | -0,778545     | 1,51049       | 0,130919   | 0,346836   | no   |
| AN12281 | ChrIII_A_nidulans_FGSC_A4:49562-51566      | WT_5hasex | WT_veg | OK     | 4,91888  | 10,248   | 1,05894       | -1,44117      | 0,149537   | 0,37817    | no   |
| AN12284 | ChrIII_A_nidulans_FGSC_A4:7393-8509        | WT_5hasex | WT_veg | OK     | 11,736   | 29,2162  | 1,31582       | -2,0559       | 0,0397926  | 0,150296   | no   |
| AN12285 | ChrV_A_nidulans_FGSC_A4:77041-77644        | WT_5hasex | WT_veg | NOTEST | 0,383398 | 0        | -1.79769e+308 | -1.79769e+308 | 0,165569   |            | 1 no |
| AN12286 | ChrV_A_nidulans_FGSC_A4:123360-123892      | WT_5hasex | WT_veg | NOTEST | 1,7427   | 0        | -1.79769e+308 | -1.79769e+308 | 0,0561526  |            | 1 no |
| AN12287 | ChrV_A_nidulans_FGSC_A4:171281-172081      | WT_5hasex | WT_veg | OK     | 6,02883  | 19,5951  | 1,70054       | -1,92099      | 0,0547335  | 0,189218   | no   |
| AN1229  | ChrVIII_A_nidulans_FGSC_A4:1129002-1129886 | WT_5hasex | WT_veg | OK     | 60,4459  | 212,794  | 1,81574       | -3,63002      | 0,0002834  | 0,00268835 | yes  |
| AN12290 | ChrIV_A_nidulans_FGSC_A4:1078232-1079255   | WT_5hasex | WT_veg | OK     | 26,1466  | 86,6483  | 1,72855       | -3,19557      | 0,00139555 | 0,0103358  | yes  |
| AN12291 | ChrIV_A_nidulans_FGSC_A4:1076575-1077727   | WT_5hasex | WT_veg | OK     | 1,86058  | 8,65197  | 2,21728       | -2,82093      | 0,0047885  | 0,0287464  | yes  |
| AN12293 | ChrV_A_nidulans_FGSC_A4:2456441-2458373    | WT_5hasex | WT_veg | NOTEST | 1,85832  | 2,17258  | 0,225408      | -0,278131     | 0,780912   |            | 1 no |
| AN12294 | ChrV_A_nidulans_FGSC_A4:2454806-2456132    | WT_5hasex | WT_veg | OK     | 1,36669  | 5,02024  | 1,87707       | -1,93539      | 0,0529423  | 0,184694   | no   |
| AN12297 | ChrV_A_nidulans_FGSC_A4:2423647-2423987    | WT_5hasex | WT_veg | NOTEST | 0        | 0        | 0             | 0             | 1          |            | 1 no |
| AN12299 | ChrV_A_nidulans_FGSC_A4:2377800-2378810    | WT_5hasex | WT_veg | OK     | 24,1052  | 34,1932  | 0,504365      | -0,898817     | 0,36875    | 0,643572   | no   |
| AN1230  | ChrVIII_A_nidulans_FGSC_A4:1127688-1128906 | WT_5hasex | WT_veg | OK     | 41,9193  | 85,0462  | 1,02063       | -2,04319      | 0,0410338  | 0,153579   | no   |
| AN12304 | ChrVII_A_nidulans_FGSC_A4:1830369-1830990  | WT_5hasex | WT_veg | OK     | 82,9776  | 186,15   | 1,16567       | -2,35719      | 0,018414   | 0,0835799  | no   |
| AN12305 | ChrVII_A_nidulans_FGSC_A4:1831726-1833143  | WT_5hasex | WT_veg | OK     | 153,348  | 404,932  | 1,40087       | -2,87791      | 0,00400319 | 0,0248078  | yes  |
| AN12306 | ChrVII_A_nidulans_FGSC_A4:1865735-1866900  | WT_5hasex | WT_veg | OK     | 34,3293  | 16,1661  | -1,08647      | 2,00975       | 0,0444581  | 0,163144   | no   |
| AN12307 | ChrVII_A_nidulans_FGSC_A4:1867273-1867855  | WT_5hasex | WT_veg | OK     | 7,2915   | 36,6959  | 2,33133       | -3,11106      | 0,00186418 | 0,01316    | yes  |
| AN12308 | ChrVII_A_nidulans_FGSC_A4:1882765-1883166  | WT_5hasex | WT_veg | NOTEST | 0        | 0        | 0             | 0             | 1          |            | 1 no |
| AN12309 | ChrVII_A_nidulans_FGSC_A4:1898837-1902156  | WT_5hasex | WT_veg | NOTEST | 0        | 0        | 0             | 0             | 1          |            | 1 no |
| AN1231  | ChrVIII_A_nidulans_FGSC_A4:1125059-1127170 | WT_5hasex | WT_veg | OK     | 6,48451  | 30,8423  | 2,24984       | -3,76803      | 0,00016454 | 0,00168405 | yes  |
| AN12311 | ChrV_A_nidulans_FGSC_A4:2326941-2327289    | WT_5hasex | WT_veg | OK     | 39,2987  | 46,1384  | 0,231487      | -0,374347     | 0,708146   | 0,873999   | no   |
| AN12312 | ChrVI_A_nidulans_FGSC_A4:3020961-3022253   | WT_5hasex | WT_veg | NOTEST | 0,744332 | 0,860081 | 0,208527      | -0,135896     | 0,891903   |            | 1 no |
| AN12313 | ChrVI_A_nidulans_FGSC_A4:3015134-3015513   | WT_5hasex | WT_veg | NOTEST | 0        | 0        | 0             | 0             | 1          |            | 1 no |
| AN12314 | ChrVI_A_nidulans_FGSC_A4:3012215-3014385   | WT_5hasex | WT_veg | NOTEST | 0        | 0        | 0             | 0             | 1          |            | 1 no |
| AN12315 | ChrVI_A_nidulans_FGSC_A4:3005414-3006022   | WT_5hasex | WT_veg | NOTEST | 0        | 0        | 0             | 0             | 1          |            | 1 no |
| AN12316 | ChrVI_A_nidulans_FGSC_A4:2986987-2987483   | WT_5hasex | WT_veg | OK     | 44,6171  | 70,0542  | 0,650876      | -1,04176      | 0,297525   | 0,572707   | no   |
| AN12317 | ChrIII_A_nidulans_FGSC_A4:2632886-2633240  | WT_5hasex | WT_veg | OK     | 42,7295  | 116,864  | 1,45153       | -2,41128      | 0,0158967  | 0,0748175  | no   |
| AN12318 | ChrIII_A_nidulans_FGSC_A4:2579994-2580496  | WT_5hasex | WT_veg | OK     | 4,26104  | 8,62249  | 1,0169        | -1,05771      | 0,290186   | 0,564851   | no   |
| AN12319 | ChrVII_A_nidulans_FGSC_A4:2473417-2473702  | WT_5hasex | WT_veg | OK     | 63,0267  | 242,846  | 1,94601       | -3,32122      | 0,00089625 | 0,0071677  | yes  |
| AN1232  | ChrVIII_A_nidulans_FGSC_A4:1121680-1124156 | WT_5hasex | WT_veg | OK     | 18,737   | 55,4279  | 1,56472       | -3,11208      | 0,00185772 | 0,0131246  | yes  |
| AN12322 | ChrII_A_nidulans_FGSC_A4:2134942-2137328   | WT_5hasex | WT_veg | OK     | 29,0837  | 52,6009  | 0,854877      | -1,74111      | 0,0816647  | 0,25127    | no   |
| AN12323 | ChrII_A_nidulans_FGSC_A4:2132019-2134499   | WT_5hasex | WT_veg | OK     | 7,58623  | 15,1294  | 0,995895      | -1,76722      | 0,0771908  | 0,241648   | no   |
| AN12324 | ChrII_A_nidulans_FGSC_A4:2131233-2131803   | WT_5hasex | WT_veg | OK     | 74,3     | 165,316  | 1,15379       | -2,26057      | 0,0237858  | 0,101542   | no   |
| AN12325 | ChrVI_A_nidulans_FGSC_A4:3383460-3384129   | WT_5hasex | WT_veg | NOTEST | 1,75864  | 3,51894  | 1,00068       | -0,905187     | 0,365366   |            | 1 no |
| AN12326 | ChrVI_A_nidulans_FGSC_A4:3379797-3381440   | WT_5hasex | WT_veg | OK     | 2,11929  | 4,01327  | 0,9212        | -1,09018      | 0,275636   | 0,548759   | no   |
| AN12327 | ChrVI_A_nidulans_FGSC_A4:3377347-3377919   | WT_5hasex | WT_veg | NOTEST | 0,891147 | 3,47889  | 1,96489       | -1,38848      | 0,164992   |            | 1 no |
| AN12328 | ChrVI_A_nidulans_FGSC_A4:3354143-3354743   | WT_5hasex | WT_veg | NOTEST | 0,471373 | 0        | -1.79769e+308 | -1.79769e+308 | 0,165569   |            | 1 no |
| AN12329 | ChrV_A_nidulans_FGSC_A4:1583778-1584819    | WT_5hasex | WT_veg | NOTEST | 0,647929 | 2,38951  | 1,88281       | -1,6994       | 0,0892431  |            | 1 no |
| AN1233  | ChrVIII_A_nidulans_FGSC_A4:1117981-1120735 | WT_5hasex | WT_veg | OK     | 7,56989  | 22,3284  | 1,56054       | -2,77904      | 0,00545195 | 0,0318747  | yes  |
| AN12330 | ChrIV_A_nidulans_FGSC_A4:2824330-2824873   | WT_5hasex | WT_veg | OK     | 7,49712  | 13,3716  | 0,834769      | -1,0315       | 0,302305   | 0,578089   | no   |
| AN12331 | ChrIV_A_nidulans_FGSC_A4:2825115-2832711   | WT_5hasex | WT_veg | OK     | 5,72154  | 0,241462 | -4,56653      | 5,42499       | 5,7959E-08 | 1,4266E-06 | yes  |
| AN12332 | ChrII_A_nidulans_FGSC_A4:714-1848          | WT_5hasex | WT_veg | NOTEST | 0        | 0        | 0             | 0             | 1          |            | 1 no |
| AN12333 | ChrII_A_nidulans_FGSC_A4:18409-21641       | WT_5hasex | WT_veg | OK     | 4,07171  | 0,290139 | -3,81082      | 1,87287       | 0,0610865  | 0,204736   | no   |
| AN12334 | ChrII_A_nidulans_FGSC_A4:43796-44399       | WT_5hasex | WT_veg | NOTEST | 0        | 0        | 0             | 0             | 1          |            | 1 no |
| AN12336 | ChrVII_A_nidulans_FGSC_A4:3371554-3372059  | WT_5hasex | WT_veg | OK     | 87,7318  | 273,541  | 1,64059       | -3,06727      | 0,00216026 | 0,0149028  | yes  |
| AN12337 | ChrVII_A_nidulans_FGSC_A4:3372393-3374949  | WT_5hasex | WT_veg | OK     | 15,3565  | 27,0762  | 0,818179      | -1,58081      | 0,113921   | 0,316489   | no   |

## Supplementary table 1

|         |                                            |           |        |        |          |          |              |              |            |            |      |
|---------|--------------------------------------------|-----------|--------|--------|----------|----------|--------------|--------------|------------|------------|------|
| AN12338 | ChrVII_A_nidulans_FGSC_A4:3400136-3401023  | WT_5hasex | WT_veg | OK     | 5,17784  | 9,15186  | 0,821713     | -1,07595     | 0,281951   | 0,555757   | no   |
| AN12339 | ChrV_A_nidulans_FGSC_A4:188768-189719      | WT_5hasex | WT_veg | OK     | 18,878   | 18,8491  | -0,00220843  | 0,00366151   | 0,997079   | 0,998851   | no   |
| AN1234  | ChrVIII_A_nidulans_FGSC_A4:1117354-1117959 | WT_5hasex | WT_veg | OK     | 28,471   | 51,2226  | 0,847288     | -1,35323     | 0,175983   | 0,420342   | no   |
| AN12340 | ChrV_A_nidulans_FGSC_A4:200354-201710      | WT_5hasex | WT_veg | NOTEST | 0        | 0,769195 | 1.79769e+308 | 1.79769e+308 | 0,237866   |            | 1 no |
| AN12341 | ChrV_A_nidulans_FGSC_A4:202080-204334      | WT_5hasex | WT_veg | NOTEST | 0        | 0,462034 | 1.79769e+308 | 1.79769e+308 | 0,123334   |            | 1 no |
| AN12342 | ChrV_A_nidulans_FGSC_A4:220238-222161      | WT_5hasex | WT_veg | NOTEST | 1,52947  | 0,175641 | -3,12233     | 1,0382       | 0,299178   |            | 1 no |
| AN12343 | ChrII_A_nidulans_FGSC_A4:1170619-1171201   | WT_5hasex | WT_veg | OK     | 13,8337  | 23,1749  | 0,744373     | -1,1054      | 0,268988   | 0,540803   | no   |
| AN12344 | ChrII_A_nidulans_FGSC_A4:1206072-1206608   | WT_5hasex | WT_veg | OK     | 83,3773  | 160,111  | 0,941348     | -1,85372     | 0,063779   | 0,210967   | no   |
| AN12345 | ChrII_A_nidulans_FGSC_A4:1209402-1210059   | WT_5hasex | WT_veg | NOTEST | 0        | 0        | 0            | 0            | 1          |            | 1 no |
| AN12348 | ChrVIII_A_nidulans_FGSC_A4:645752-646064   | WT_5hasex | WT_veg | OK     | 23,8022  | 37,5848  | 0,659052     | -0,917496    | 0,358883   | 0,633803   | no   |
| AN12350 | ChrI_A_nidulans_FGSC_A4:1507428-1507742    | WT_5hasex | WT_veg | OK     | 25,6384  | 35,3745  | 0,464404     | -0,540352    | 0,588954   | 0,806544   | no   |
| AN12351 | ChrI_A_nidulans_FGSC_A4:1474093-1474709    | WT_5hasex | WT_veg | NOTEST | 0        | 0        | 0            | 0            | 1          |            | 1 no |
| AN12353 | ChrII_A_nidulans_FGSC_A4:3854731-3855927   | WT_5hasex | WT_veg | OK     | 9,55753  | 12,4539  | 0,381884     | -0,591996    | 0,553853   | 0,784427   | no   |
| AN12354 | ChrII_A_nidulans_FGSC_A4:3834494-3835773   | WT_5hasex | WT_veg | OK     | 3,65667  | 20,8234  | 2,5096       | -3,28797     | 0,00100913 | 0,00791266 | yes  |
| AN12355 | ChrII_A_nidulans_FGSC_A4:3834091-3834421   | WT_5hasex | WT_veg | OK     | 3,77993  | 20,3615  | 2,42941      | -2,66884     | 0,00761128 | 0,0418824  | yes  |
| AN12356 | ChrII_A_nidulans_FGSC_A4:3832861-3833479   | WT_5hasex | WT_veg | NOTEST | 1,32065  | 0,286666 | -2,20381     | 0,724186     | 0,468952   |            | 1 no |
| AN12357 | ChrII_A_nidulans_FGSC_A4:3828889-3830508   | WT_5hasex | WT_veg | OK     | 2,73127  | 1,56281  | -0,805427    | 0,821197     | 0,411534   | 0,681442   | no   |
| AN12358 | ChrI_A_nidulans_FGSC_A4:851926-852853      | WT_5hasex | WT_veg | OK     | 40,3296  | 59,5829  | 0,563059     | -1,09754     | 0,272407   | 0,544939   | no   |
| AN12359 | ChrI_A_nidulans_FGSC_A4:830956-831453      | WT_5hasex | WT_veg | OK     | 1,43296  | 5,15317  | 1,84646      | -1,5586      | 0,119091   | 0,326033   | no   |
| AN1236  | ChrVIII_A_nidulans_FGSC_A4:1110128-1111816 | WT_5hasex | WT_veg | OK     | 5,97787  | 25,7092  | 2,10458      | -3,1955      | 0,00139588 | 0,0103358  | yes  |
| AN12360 | ChrI_A_nidulans_FGSC_A4:813816-816155      | WT_5hasex | WT_veg | OK     | 27,0937  | 39,6113  | 0,547955     | -1,11308     | 0,265673   | 0,537052   | no   |
| AN12361 | ChrVII_A_nidulans_FGSC_A4:998602-999070    | WT_5hasex | WT_veg | NOTEST | 0,913331 | 0,398222 | -1,19756     | 0,378859     | 0,704793   |            | 1 no |
| AN12364 | ChrIII_A_nidulans_FGSC_A4:2656018-2656938  | WT_5hasex | WT_veg | OK     | 53,3516  | 141,525  | 1,40746      | -2,78921     | 0,00528373 | 0,0310868  | yes  |
| AN12366 | ChrVII_A_nidulans_FGSC_A4:4111490-4112468  | WT_5hasex | WT_veg | OK     | 33,1086  | 46,4801  | 0,489409     | -0,907137    | 0,364334   | 0,639271   | no   |
| AN12369 | ChrVIII_A_nidulans_FGSC_A4:2702898-2704398 | WT_5hasex | WT_veg | OK     | 2,48371  | 2,2835   | -0,121252    | 0,145872     | 0,884023   | 0,955953   | no   |
| AN12371 | ChrI_A_nidulans_FGSC_A4:3707884-3708488    | WT_5hasex | WT_veg | NOTEST | 1,22218  | 2,59463  | 1,08607      | -0,61801     | 0,536569   |            | 1 no |
| AN12372 | ChrI_A_nidulans_FGSC_A4:3724206-3724554    | WT_5hasex | WT_veg | NOTEST | 0        | 0        | 0            | 0            | 1          |            | 1 no |
| AN12373 | ChrIV_A_nidulans_FGSC_A4:517452-518659     | WT_5hasex | WT_veg | OK     | 15,7963  | 22,396   | 0,503656     | -0,646346    | 0,518055   | 0,762089   | no   |
| AN12374 | ChrIV_A_nidulans_FGSC_A4:492950-495589     | WT_5hasex | WT_veg | OK     | 3,8187   | 6,22145  | 0,704171     | -0,950873    | 0,341669   | 0,617298   | no   |
| AN12375 | ChrV_A_nidulans_FGSC_A4:251993-253656      | WT_5hasex | WT_veg | OK     | 0,773782 | 12,5128  | 4,01533      | -2,03114     | 0,042241   | 0,156965   | no   |
| AN12376 | ChrV_A_nidulans_FGSC_A4:296880-297546      | WT_5hasex | WT_veg | NOTEST | 0        | 0        | 0            | 0            | 1          |            | 1 no |
| AN12377 | ChrVI_A_nidulans_FGSC_A4:1489608-1490001   | WT_5hasex | WT_veg | OK     | 1,60901  | 4,06736  | 1,33792      | -1,08144     | 0,279502   | 0,553158   | no   |
| AN12378 | ChrVI_A_nidulans_FGSC_A4:1456343-1458359   | WT_5hasex | WT_veg | OK     | 7,49364  | 5,48123  | -0,451166    | 0,588092     | 0,556471   | 0,786407   | no   |
| AN12379 | ChrVI_A_nidulans_FGSC_A4:2720412-2721878   | WT_5hasex | WT_veg | OK     | 0,409351 | 12,2494  | 4,90323      | -2,37889     | 0,0173648  | 0,079982   | no   |
| AN12385 | ChrVII_A_nidulans_FGSC_A4:267253-268525    | WT_5hasex | WT_veg | OK     | 1,13659  | 4,4331   | 1,9636       | -1,38756     | 0,16527    | 0,403489   | no   |
| AN12386 | ChrII_A_nidulans_FGSC_A4:2721876-2722803   | WT_5hasex | WT_veg | OK     | 12,3511  | 22,3975  | 0,858698     | -1,35333     | 0,175949   | 0,420323   | no   |
| AN12387 | ChrII_A_nidulans_FGSC_A4:2712140-2714657   | WT_5hasex | WT_veg | OK     | 12,9185  | 11,0382  | -0,226927    | 0,42091      | 0,673821   | 0,854601   | no   |
| AN12388 | ChrII_A_nidulans_FGSC_A4:2706241-2707144   | WT_5hasex | WT_veg | OK     | 1,92345  | 9,58421  | 2,31697      | -2,78598     | 0,00533669 | 0,0313267  | yes  |
| AN12389 | ChrII_A_nidulans_FGSC_A4:2703847-2705300   | WT_5hasex | WT_veg | OK     | 38,6882  | 173,029  | 2,16105      | -4,38414     | 1,1645E-05 | 0,0001643  | yes  |
| AN1239  | ChrVIII_A_nidulans_FGSC_A4:1101691-1102504 | WT_5hasex | WT_veg | OK     | 5,12379  | 6,46766  | 0,336033     | -0,433915    | 0,66435    | 0,84985    | no   |
| AN12390 | ChrVII_A_nidulans_FGSC_A4:311942-313116    | WT_5hasex | WT_veg | NOTEST | 0        | 0        | 0            | 0            | 1          |            | 1 no |
| AN12391 | ChrVII_A_nidulans_FGSC_A4:310808-311348    | WT_5hasex | WT_veg | OK     | 4,73635  | 7,73813  | 0,708209     | -0,841748    | 0,399929   | 0,672219   | no   |
| AN12392 | ChrVII_A_nidulans_FGSC_A4:309722-310155    | WT_5hasex | WT_veg | OK     | 32,2353  | 74,342   | 1,20554      | -1,93889     | 0,0525142  | 0,183616   | no   |
| AN12394 | ChrV_A_nidulans_FGSC_A4:760632-760967      | WT_5hasex | WT_veg | NOTEST | 0        | 0        | 0            | 0            | 1          |            | 1 no |
| AN12395 | ChrV_A_nidulans_FGSC_A4:44575-45171        | WT_5hasex | WT_veg | NOTEST | 0        | 1,62982  | 1.79769e+308 | 1.79769e+308 | 0,123323   |            | 1 no |
| AN12396 | ChrIII_A_nidulans_FGSC_A4:142197-142590    | WT_5hasex | WT_veg | NOTEST | 0        | 2,37973  | 1.79769e+308 | 1.79769e+308 | 0,123323   |            | 1 no |
| AN12397 | ChrIII_A_nidulans_FGSC_A4:130560-130893    | WT_5hasex | WT_veg | NOTEST | 0        | 0        | 0            | 0            | 1          |            | 1 no |
| AN12398 | ChrIII_A_nidulans_FGSC_A4:128676-129743    | WT_5hasex | WT_veg | OK     | 18,1648  | 33,5401  | 0,884742     | -1,55201     | 0,12066    | 0,328731   | no   |
| AN12400 | ChrIV_A_nidulans_FGSC_A4:487736-488615     | WT_5hasex | WT_veg | OK     | 9,80045  | 2,38872  | -2,03661     | 1,9744       | 0,0483359  | 0,17345    | no   |
| AN12402 | ChrII_A_nidulans_FGSC_A4:446922-448268     | WT_5hasex | WT_veg | OK     | 3,83016  | 7,79374  | 1,02491      | -1,3493      | 0,17724    | 0,422264   | no   |
| AN12403 | ChrII_A_nidulans_FGSC_A4:1149188-1153142   | WT_5hasex | WT_veg | OK     | 11,2051  | 11,8973  | 0,0864838    | -0,166787    | 0,867538   | 0,949299   | no   |
| AN12404 | ChrII_A_nidulans_FGSC_A4:1154034-1155381   | WT_5hasex | WT_veg | OK     | 21,8036  | 42,5303  | 0,963924     | -1,81733     | 0,0691671  | 0,22356    | no   |
| AN12406 | ChrII_A_nidulans_FGSC_A4:853771-854272     | WT_5hasex | WT_veg | NOTEST | 0        | 0        | 0            | 0            | 1          |            | 1 no |

## Supplementary table 1

|         |                                            |           |        |        |          |          |               |               |            |            |     |
|---------|--------------------------------------------|-----------|--------|--------|----------|----------|---------------|---------------|------------|------------|-----|
| AN12407 | ChrII_A_nidulans_FGSC_A4:1483516-1483827   | WT_5hasex | WT_veg | OK     | 203,758  | 411,067  | 1,01251       | -2,00308      | 0,0451686  | 0,165013   | no  |
| AN12408 | ChrI_A_nidulans_FGSC_A4:3535145-3537192    | WT_5hasex | WT_veg | OK     | 66,404   | 82,4896  | 0,312942      | -0,625591     | 0,531583   | 0,770819   | no  |
| AN12409 | ChrI_A_nidulans_FGSC_A4:3556650-3557332    | WT_5hasex | WT_veg | OK     | 5,81678  | 8,61558  | 0,566728      | -0,637956     | 0,523502   | 0,765631   | no  |
| AN12411 | ChrVII_A_nidulans_FGSC_A4:679145-679528    | WT_5hasex | WT_veg | OK     | 1,24719  | 7,53197  | 2,59435       | -1,67703      | 0,0935375  | 0,276284   | no  |
| AN12413 | ChrVII_A_nidulans_FGSC_A4:449083-449446    | WT_5hasex | WT_veg | OK     | 2,91363  | 1,98512  | -0,553593     | 0,360152      | 0,718733   | 0,879526   | no  |
| AN12414 | ChrVII_A_nidulans_FGSC_A4:326855-327349    | WT_5hasex | WT_veg | NOTEST | 0        | 0        | 0             | 0             | 1          | 1          | no  |
| AN12417 | ChrVIII_A_nidulans_FGSC_A4:549642-550488   | WT_5hasex | WT_veg | OK     | 32,502   | 44,2851  | 0,446293      | -0,832417     | 0,405173   | 0,676304   | no  |
| AN12418 | ChrV_A_nidulans_FGSC_A4:7784-8354          | WT_5hasex | WT_veg | NOTEST | 0,475808 | 0        | -1.79769e+308 | -1.79769e+308 | 0,224063   | 1          | no  |
| AN12419 | ChrVIII_A_nidulans_FGSC_A4:2653427-2654216 | WT_5hasex | WT_veg | OK     | 17,3312  | 118,6    | 2,77466       | -4,63334      | 3,5982E-06 | 5,7644E-05 | yes |
| AN1242  | ChrVIII_A_nidulans_FGSC_A4:1072960-1092126 | WT_5hasex | WT_veg | NOTEST | 0,94576  | 0,343445 | -1,46139      | 2,33641       | 0,0194698  | 1          | no  |
| AN12423 | ChrI_A_nidulans_FGSC_A4:3569267-3570214    | WT_5hasex | WT_veg | OK     | 8,4505   | 6,85296  | -0,30231      | 0,255314      | 0,79848    | 0,918715   | no  |
| AN12424 | ChrVI_A_nidulans_FGSC_A4:2702469-2702730   | WT_5hasex | WT_veg | OK     | 0        | 5,7895   | 1.79769e+308  | 1.79769e+308  | 0,123323   | 0,333265   | no  |
| AN12426 | ChrII_A_nidulans_FGSC_A4:1084855-1087570   | WT_5hasex | WT_veg | OK     | 67,0261  | 608,625  | 3,18276       | -5,97153      | 2,3505E-09 | 7,6788E-08 | yes |
| AN12427 | ChrII_A_nidulans_FGSC_A4:1088709-1089159   | WT_5hasex | WT_veg | OK     | 61,1544  | 169,579  | 1,47143       | -2,57488      | 0,0100276  | 0,0522437  | no  |
| AN12428 | ChrVIII_A_nidulans_FGSC_A4:708112-708754   | WT_5hasex | WT_veg | OK     | 11,0429  | 26,5807  | 1,26725       | -1,88116      | 0,0599502  | 0,202156   | no  |
| AN12429 | ChrVIII_A_nidulans_FGSC_A4:712578-714609   | WT_5hasex | WT_veg | OK     | 8,4831   | 31,0844  | 1,87353       | -3,16059      | 0,00157449 | 0,0114417  | yes |
| AN1243  | ChrVIII_A_nidulans_FGSC_A4:1070769-1072702 | WT_5hasex | WT_veg | OK     | 35,5353  | 164,355  | 2,20949       | -4,00271      | 6,2621E-05 | 0,00072954 | yes |
| AN12431 | ChrII_A_nidulans_FGSC_A4:453970-466058     | WT_5hasex | WT_veg | OK     | 3,71249  | 8,62566  | 1,21625       | -1,82294      | 0,0683131  | 0,221642   | no  |
| AN12434 | ChrIII_A_nidulans_FGSC_A4:2705644-2706145  | WT_5hasex | WT_veg | OK     | 5,38776  | 17,7375  | 1,71904       | -2,07443      | 0,0380393  | 0,145298   | no  |
| AN12435 | ChrIII_A_nidulans_FGSC_A4:2702007-2704524  | WT_5hasex | WT_veg | OK     | 2,08099  | 5,47371  | 1,39525       | -1,95721      | 0,0503224  | 0,178326   | no  |
| AN12437 | ChrV_A_nidulans_FGSC_A4:2263337-2264060    | WT_5hasex | WT_veg | OK     | 13,9269  | 31,7672  | 1,18967       | -1,87975      | 0,0601419  | 0,20262    | no  |
| AN1244  | ChrVIII_A_nidulans_FGSC_A4:1067454-1069947 | WT_5hasex | WT_veg | OK     | 52,0015  | 110,107  | 1,08229       | -2,25799      | 0,0239461  | 0,10206    | no  |
| AN12440 | ChrII_A_nidulans_FGSC_A4:876955-881104     | WT_5hasex | WT_veg | NOTEST | 0,1602   | 0,380104 | 1,24652       | -1,02756      | 0,304157   | 1          | no  |
| AN12441 | ChrI_A_nidulans_FGSC_A4:1156959-1158070    | WT_5hasex | WT_veg | OK     | 21,3863  | 1,45735  | -3,87526      | 3,658         | 0,00025419 | 0,00245033 | yes |
| AN12442 | ChrI_A_nidulans_FGSC_A4:1154700-1156602    | WT_5hasex | WT_veg | NOTEST | 0,329024 | 0        | -1.79769e+308 | -1.79769e+308 | 0,0703913  | 1          | no  |
| AN12443 | ChrV_A_nidulans_FGSC_A4:3328307-3329298    | WT_5hasex | WT_veg | OK     | 6,18499  | 4,80318  | -0,364783     | 0,416146      | 0,677303   | 0,856902   | no  |
| AN12445 | ChrV_A_nidulans_FGSC_A4:246413-248295      | WT_5hasex | WT_veg | NOTEST | 0,427146 | 0,112021 | -1,93096      | 0,639702      | 0,522366   | 1          | no  |
| AN12446 | ChrV_A_nidulans_FGSC_A4:248563-249650      | WT_5hasex | WT_veg | NOTEST | 0        | 0        | 0             | 0             | 1          | 1          | no  |
| AN12449 | ChrII_A_nidulans_FGSC_A4:846962-848999     | WT_5hasex | WT_veg | OK     | 25,7259  | 54,7955  | 1,09083       | -2,20861      | 0,0272018  | 0,112451   | no  |
| AN1245  | ChrVIII_A_nidulans_FGSC_A4:1065602-1066336 | WT_5hasex | WT_veg | OK     | 200,999  | 490,972  | 1,28845       | -2,62172      | 0,00874864 | 0,0468711  | yes |
| AN12450 | ChrII_A_nidulans_FGSC_A4:3886421-3888378   | WT_5hasex | WT_veg | OK     | 15,75    | 73,4739  | 2,22188       | -2,84908      | 0,00438458 | 0,0267755  | yes |
| AN12452 | ChrVII_A_nidulans_FGSC_A4:960382-962292    | WT_5hasex | WT_veg | OK     | 24,9801  | 33,3762  | 0,418043      | -0,793578     | 0,427441   | 0,694256   | no  |
| AN12453 | ChrVIII_A_nidulans_FGSC_A4:890655-892133   | WT_5hasex | WT_veg | NOTEST | 0        | 0        | 0             | 0             | 1          | 1          | no  |
| AN12457 | ChrVI_A_nidulans_FGSC_A4:1450640-1451703   | WT_5hasex | WT_veg | OK     | 19,56    | 14,1443  | -0,46768      | 0,768202      | 0,442367   | 0,706262   | no  |
| AN12458 | ChrII_A_nidulans_FGSC_A4:414744-416598     | WT_5hasex | WT_veg | OK     | 23,4003  | 16,878   | -0,471386     | 0,797427      | 0,425203   | 0,692875   | no  |
| AN12459 | ChrIII_A_nidulans_FGSC_A4:768215-770924    | WT_5hasex | WT_veg | OK     | 15,02    | 32,6064  | 1,11827       | -1,82957      | 0,0673145  | 0,219317   | no  |
| AN12460 | ChrVI_A_nidulans_FGSC_A4:3302000-3303031   | WT_5hasex | WT_veg | OK     | 2,79091  | 16,6078  | 2,57305       | -3,44222      | 0,00057696 | 0,00492324 | yes |
| AN12461 | ChrII_A_nidulans_FGSC_A4:2126821-2128994   | WT_5hasex | WT_veg | OK     | 62,7681  | 85,8864  | 0,452398      | -0,883854     | 0,376775   | 0,651438   | no  |
| AN12465 | ChrIII_A_nidulans_FGSC_A4:1587552-1589408  | WT_5hasex | WT_veg | OK     | 192,862  | 350,011  | 0,85983       | -1,72465      | 0,0845912  | 0,257868   | no  |
| AN12466 | ChrVII_A_nidulans_FGSC_A4:3341321-3343085  | WT_5hasex | WT_veg | OK     | 19,3679  | 32,9147  | 0,765062      | -1,23654      | 0,216257   | 0,476367   | no  |
| AN1247  | ChrVIII_A_nidulans_FGSC_A4:1061301-1063099 | WT_5hasex | WT_veg | OK     | 237,806  | 686,18   | 1,5288        | -3,04787      | 0,00230467 | 0,0157047  | yes |
| AN12470 | ChrVII_A_nidulans_FGSC_A4:2978120-2980726  | WT_5hasex | WT_veg | OK     | 70,5589  | 91,9559  | 0,382113      | -0,771402     | 0,440468   | 0,704626   | no  |
| AN1248  | ChrVIII_A_nidulans_FGSC_A4:1058914-1061171 | WT_5hasex | WT_veg | OK     | 14,8875  | 16,6386  | 0,160429      | -0,291866     | 0,770389   | 0,905602   | no  |
| AN1249  | ChrVIII_A_nidulans_FGSC_A4:1056134-1058647 | WT_5hasex | WT_veg | OK     | 20,4341  | 30,5749  | 0,581369      | -1,16879      | 0,242487   | 0,509209   | no  |
| AN1250  | ChrVIII_A_nidulans_FGSC_A4:1052986-1055356 | WT_5hasex | WT_veg | OK     | 392,606  | 1604,58  | 2,03105       | -3,40245      | 0,00066784 | 0,00556291 | yes |
| AN1251  | ChrVIII_A_nidulans_FGSC_A4:1051012-1052349 | WT_5hasex | WT_veg | OK     | 57,9702  | 51,2698  | -0,177203     | 0,354293      | 0,72312    | 0,882086   | no  |
| AN1252  | ChrVIII_A_nidulans_FGSC_A4:1044301-1045786 | WT_5hasex | WT_veg | OK     | 32,7651  | 71,5202  | 1,12619       | -1,97835      | 0,0478887  | 0,172436   | no  |
| AN1253  | ChrVIII_A_nidulans_FGSC_A4:1042821-1043391 | WT_5hasex | WT_veg | OK     | 16,1698  | 21,8324  | 0,433169      | -0,639979     | 0,522187   | 0,76471    | no  |
| AN1254  | ChrVIII_A_nidulans_FGSC_A4:1040327-1041542 | WT_5hasex | WT_veg | OK     | 19,5363  | 49,8198  | 1,35056       | -2,44742      | 0,0143881  | 0,069273   | no  |
| AN1255  | ChrVIII_A_nidulans_FGSC_A4:1034807-1039412 | WT_5hasex | WT_veg | OK     | 13,289   | 33,8016  | 1,34686       | -2,75754      | 0,00582384 | 0,033684   | yes |
| AN1256  | ChrVIII_A_nidulans_FGSC_A4:1031188-1033836 | WT_5hasex | WT_veg | OK     | 38,0099  | 129,265  | 1,76589       | -3,68492      | 0,00022877 | 0,00223703 | yes |
| AN1257  | ChrVIII_A_nidulans_FGSC_A4:1028804-1029933 | WT_5hasex | WT_veg | OK     | 1,61145  | 3,94612  | 1,29208       | -1,43955      | 0,149995   | 0,78889    | no  |
| AN1258  | ChrVIII_A_nidulans_FGSC_A4:1025018-1027816 | WT_5hasex | WT_veg | OK     | 54,3636  | 54,2764  | -0,00231502   | 0,00474707    | 0,996212   | 0,998531   | no  |

## Supplementary table 1

|         |                                            |           |        |        |          |          |               |               |            |            |     |
|---------|--------------------------------------------|-----------|--------|--------|----------|----------|---------------|---------------|------------|------------|-----|
| AN1259  | ChrVIII_A_nidulans_FGSC_A4:1022096-1024187 | WT_5hasex | WT_veg | OK     | 37,7437  | 71,5602  | 0,922923      | -1,92089      | 0,0547452  | 0,189245   | no  |
| AN1260  | ChrVIII_A_nidulans_FGSC_A4:1020319-1021925 | WT_5hasex | WT_veg | OK     | 23,2869  | 78,206   | 1,74776       | -3,43229      | 0,0005985  | 0,0050765  | yes |
| AN1261  | ChrVIII_A_nidulans_FGSC_A4:1018812-1019629 | WT_5hasex | WT_veg | OK     | 2,53842  | 3,42262  | 0,431169      | -0,422547     | 0,668981   | 0,851909   | no  |
| AN1262  | ChrVIII_A_nidulans_FGSC_A4:1017038-1018365 | WT_5hasex | WT_veg | OK     | 769,982  | 114,913  | -2,74429      | 4,81039       | 1,5064E-06 | 2,6569E-05 | yes |
| AN1263  | ChrVIII_A_nidulans_FGSC_A4:1014298-1016194 | WT_5hasex | WT_veg | OK     | 563,552  | 514,84   | -0,130424     | 0,237189      | 0,812511   | 0,924734   | no  |
| AN1266  | ChrVIII_A_nidulans_FGSC_A4:1003882-1007635 | WT_5hasex | WT_veg | OK     | 24,5832  | 46,7199  | 0,926367      | -1,91086      | 0,056023   | 0,192329   | no  |
| AN1267  | ChrVIII_A_nidulans_FGSC_A4:1002004-1003538 | WT_5hasex | WT_veg | OK     | 145,662  | 271,493  | 0,898295      | -1,82979      | 0,0672813  | 0,219286   | no  |
| AN1268  | ChrVIII_A_nidulans_FGSC_A4:994263-1000008  | WT_5hasex | WT_veg | OK     | 8,82088  | 11,1927  | 0,343559      | -0,67054      | 0,502513   | 0,751504   | no  |
| AN1269  | ChrVIII_A_nidulans_FGSC_A4:992774-994042   | WT_5hasex | WT_veg | OK     | 22,7739  | 85,4703  | 1,90804       | -3,44907      | 0,00056252 | 0,00481649 | yes |
| AN1270  | ChrVIII_A_nidulans_FGSC_A4:989938-991415   | WT_5hasex | WT_veg | OK     | 141,816  | 296,968  | 1,06629       | -2,14251      | 0,0321522  | 0,128018   | no  |
| AN1271  | ChrVIII_A_nidulans_FGSC_A4:986686-987679   | WT_5hasex | WT_veg | OK     | 18,469   | 47,1904  | 1,35339       | -2,23119      | 0,0256687  | 0,10765    | no  |
| AN1272  | ChrVIII_A_nidulans_FGSC_A4:985097-986631   | WT_5hasex | WT_veg | OK     | 78,7555  | 115,214  | 0,548857      | -1,09276      | 0,274501   | 0,547268   | no  |
| AN1274  | ChrVIII_A_nidulans_FGSC_A4:978827-980022   | WT_5hasex | WT_veg | OK     | 322,616  | 2486,76  | 2,94638       | -5,07568      | 3,8612E-07 | 7,8515E-06 | yes |
| AN1275  | ChrVIII_A_nidulans_FGSC_A4:977339-978130   | WT_5hasex | WT_veg | OK     | 17,8192  | 33,6462  | 0,91701       | -1,51636      | 0,129429   | 0,344265   | no  |
| AN1276  | ChrVIII_A_nidulans_FGSC_A4:975096-977073   | WT_5hasex | WT_veg | OK     | 8,24005  | 16,489   | 1,00078       | -1,65314      | 0,0983032  | 0,285849   | no  |
| AN1278  | ChrVIII_A_nidulans_FGSC_A4:971843-972256   | WT_5hasex | WT_veg | OK     | 1267,06  | 10433,6  | 3,04168       | -5,50498      | 3,692E-08  | 9,456E-07  | yes |
| AN1279  | ChrVIII_A_nidulans_FGSC_A4:970008-971019   | WT_5hasex | WT_veg | OK     | 49,8333  | 93,0313  | 0,900606      | -1,6262       | 0,103908   | 0,297491   | no  |
| AN1280  | ChrVIII_A_nidulans_FGSC_A4:964753-969542   | WT_5hasex | WT_veg | OK     | 20,9421  | 17,0765  | -0,294387     | 0,608115      | 0,543111   | 0,777726   | no  |
| AN1281  | ChrVIII_A_nidulans_FGSC_A4:960247-963741   | WT_5hasex | WT_veg | OK     | 27,9348  | 72,7245  | 1,38038       | -2,75716      | 0,00583059 | 0,0337123  | yes |
| AN1282  | ChrVIII_A_nidulans_FGSC_A4:960247-963741   | WT_5hasex | WT_veg | OK     | 67,9791  | 143,201  | 1,07488       | -2,16987      | 0,0300165  | 0,121429   | no  |
| AN1283  | ChrVIII_A_nidulans_FGSC_A4:956540-959892   | WT_5hasex | WT_veg | OK     | 32,8361  | 19,0512  | -0,785396     | 1,61125       | 0,107125   | 0,303995   | no  |
| AN1286  | ChrVIII_A_nidulans_FGSC_A4:946266-949744   | WT_5hasex | WT_veg | OK     | 19,3743  | 26,1627  | 0,433366      | -0,867633     | 0,385595   | 0,659442   | no  |
| AN1287  | ChrVIII_A_nidulans_FGSC_A4:943957-945520   | WT_5hasex | WT_veg | OK     | 88,1629  | 111,309  | 0,336325      | -0,681552     | 0,495522   | 0,746524   | no  |
| AN1288  | ChrVIII_A_nidulans_FGSC_A4:940361-942563   | WT_5hasex | WT_veg | OK     | 20,0579  | 127,777  | 2,67139       | -5,37373      | 7,7123E-08 | 1,8412E-06 | yes |
| AN1290  | ChrVIII_A_nidulans_FGSC_A4:931265-934071   | WT_5hasex | WT_veg | OK     | 13,9463  | 12,7037  | -0,134637     | 0,255535      | 0,79831    | 0,918689   | no  |
| AN1291  | ChrVIII_A_nidulans_FGSC_A4:928941-929645   | WT_5hasex | WT_veg | OK     | 51,4008  | 66,6192  | 0,374148      | -0,660524     | 0,508917   | 0,755497   | no  |
| AN1292  | ChrVIII_A_nidulans_FGSC_A4:924550-926929   | WT_5hasex | WT_veg | OK     | 32,7159  | 57,234   | 0,806879      | -1,60167      | 0,109229   | 0,307909   | no  |
| AN1293  | ChrVIII_A_nidulans_FGSC_A4:924550-926929   | WT_5hasex | WT_veg | OK     | 24,3809  | 45,4793  | 0,899458      | -1,57406      | 0,115473   | 0,319146   | no  |
| AN1294  | ChrVIII_A_nidulans_FGSC_A4:922991-923848   | WT_5hasex | WT_veg | OK     | 2,6948   | 2,87121  | 0,0914841     | -0,0844944    | 0,932663   | 0,974642   | no  |
| AN1295  | ChrVIII_A_nidulans_FGSC_A4:921410-922697   | WT_5hasex | WT_veg | OK     | 44,2768  | 130,78   | 1,56252       | -2,93316      | 0,00335536 | 0,0214895  | yes |
| AN1296  | ChrVIII_A_nidulans_FGSC_A4:918534-921015   | WT_5hasex | WT_veg | OK     | 21,1767  | 37,1512  | 0,810932      | -1,55681      | 0,119516   | 0,326815   | no  |
| AN1297  | ChrVIII_A_nidulans_FGSC_A4:916154-917886   | WT_5hasex | WT_veg | OK     | 43,5299  | 37,99    | -0,196387     | 0,363737      | 0,716055   | 0,878176   | no  |
| AN1298  | ChrVIII_A_nidulans_FGSC_A4:908544-910591   | WT_5hasex | WT_veg | OK     | 85,2932  | 114,284  | 0,422122      | -0,757807     | 0,448566   | 0,711154   | no  |
| AN13001 | ChrII_A_nidulans_FGSC_A4:2726410-2728589   | WT_5hasex | WT_veg | NOTEST | 0,774736 | 1,63422  | 1,07682       | -1,1372       | 0,255453   | 1          | no  |
| AN1301  | ChrVIII_A_nidulans_FGSC_A4:896539-897855   | WT_5hasex | WT_veg | NOTEST | 0,931861 | 0,156306 | -2,57574      | 0,851358      | 0,394571   | 1          | no  |
| AN1302  | ChrVIII_A_nidulans_FGSC_A4:890655-892133   | WT_5hasex | WT_veg | OK     | 2,69821  | 5,59784  | 1,05287       | -1,38808      | 0,165114   | 0,403183   | no  |
| AN1304  | ChrVIII_A_nidulans_FGSC_A4:885442-886100   | WT_5hasex | WT_veg | OK     | 23,036   | 36,0217  | 0,644974      | -1,01786      | 0,308747   | 0,584985   | no  |
| AN1305  | ChrVIII_A_nidulans_FGSC_A4:883521-884274   | WT_5hasex | WT_veg | OK     | 15,9627  | 62,3858  | 1,96651       | -3,147        | 0,00164957 | 0,0118885  | yes |
| AN1306  | ChrVIII_A_nidulans_FGSC_A4:879739-880942   | WT_5hasex | WT_veg | OK     | 14,4917  | 28,5017  | 0,975818      | -1,65324      | 0,0982828  | 0,285806   | no  |
| AN1307  | ChrVIII_A_nidulans_FGSC_A4:878053-878791   | WT_5hasex | WT_veg | NOTEST | 0        | 2,16098  | 1.79769e+308  | 1.79769e+308  | 0,123323   | 1          | no  |
| AN1308  | ChrVIII_A_nidulans_FGSC_A4:873883-874796   | WT_5hasex | WT_veg | NOTEST | 0        | 0        | 0             | 0             | 1          | 1          | no  |
| AN1309  | ChrVIII_A_nidulans_FGSC_A4:871336-873659   | WT_5hasex | WT_veg | NOTEST | 0,313537 | 0        | -1.79769e+308 | -1.79769e+308 | 0,0908325  | 1          | no  |
| AN1310  | ChrVIII_A_nidulans_FGSC_A4:867974-869693   | WT_5hasex | WT_veg | OK     | 8,15869  | 2,68209  | -1,60498      | 2,04139       | 0,0412123  | 0,154115   | no  |
| AN1311  | ChrVIII_A_nidulans_FGSC_A4:865569-866932   | WT_5hasex | WT_veg | OK     | 5,90611  | 2,86279  | -1,04479      | 1,33064       | 0,183308   | 0,431078   | no  |
| AN1312  | ChrVIII_A_nidulans_FGSC_A4:863502-864683   | WT_5hasex | WT_veg | OK     | 11,7793  | 16,7029  | 0,503843      | -0,743147     | 0,457393   | 0,718226   | no  |
| AN1313  | ChrVIII_A_nidulans_FGSC_A4:861957-863097   | WT_5hasex | WT_veg | NOTEST | 0        | 0        | 0             | 0             | 1          | 1          | no  |
| AN1314  | ChrVIII_A_nidulans_FGSC_A4:857096-859203   | WT_5hasex | WT_veg | OK     | 3,85589  | 0,903135 | -2,09405      | 1,93692       | 0,0527546  | 0,184223   | no  |
| AN1315  | ChrVIII_A_nidulans_FGSC_A4:854532-855833   | WT_5hasex | WT_veg | NOTEST | 1,36626  | 0,172624 | -2,98452      | 0,992642      | 0,320884   | 1          | no  |
| AN1316  | ChrVIII_A_nidulans_FGSC_A4:852430-853316   | WT_5hasex | WT_veg | NOTEST | 0        | 0        | 0             | 0             | 1          | 1          | no  |
| AN1317  | ChrVIII_A_nidulans_FGSC_A4:850428-851802   | WT_5hasex | WT_veg | NOTEST | 0        | 0        | 0             | 0             | 1          | 1          | no  |
| AN1318  | ChrVIII_A_nidulans_FGSC_A4:846777-848123   | WT_5hasex | WT_veg | NOTEST | 0        | 0,169308 | 1.79769e+308  | 1.79769e+308  | 0,309884   | 1          | no  |
| AN1319  | ChrVIII_A_nidulans_FGSC_A4:844695-845477   | WT_5hasex | WT_veg | OK     | 230,887  | 668,218  | 1,53313       | -3,10572      | 0,00189816 | 0,0133603  | yes |
| AN1320  | ChrVIII_A_nidulans_FGSC_A4:842396-843226   | WT_5hasex | WT_veg | OK     | 0,233046 | 5,11311  | 4,45552       | -2,85625      | 0,0042868  | 0,0262672  | yes |

## Supplementary table 1

|        |                                          |           |        |        |          |         |            |           |            |            |     |
|--------|------------------------------------------|-----------|--------|--------|----------|---------|------------|-----------|------------|------------|-----|
| AN1321 | ChrVIII_A_nidulans_FGSC_A4:839947-841063 | WT_5hasex | WT_veg | NOTEST | 0,690012 | 2,01998 | 1,54965    | -1,52316  | 0,127719   | 1          | no  |
| AN1322 | ChrVIII_A_nidulans_FGSC_A4:832620-835047 | WT_5hasex | WT_veg | OK     | 5,08042  | 25,9708 | 2,35387    | -3,34408  | 0,00082557 | 0,00666983 | yes |
| AN1323 | ChrVIII_A_nidulans_FGSC_A4:830930-832241 | WT_5hasex | WT_veg | OK     | 2,55728  | 5,04499 | 0,98024    | -1,04176  | 0,297521   | 0,572707   | no  |
| AN1325 | ChrVIII_A_nidulans_FGSC_A4:821818-825395 | WT_5hasex | WT_veg | OK     | 33,3183  | 43,7482 | 0,392907   | -0,799834 | 0,423807   | 0,691676   | no  |
| AN1326 | ChrVIII_A_nidulans_FGSC_A4:817028-820092 | WT_5hasex | WT_veg | OK     | 16,5406  | 28,3149 | 0,775548   | -1,53462  | 0,124877   | 0,336235   | no  |
| AN1327 | ChrVIII_A_nidulans_FGSC_A4:814378-816520 | WT_5hasex | WT_veg | OK     | 22,7168  | 60,5561 | 1,41451    | -2,85537  | 0,00429865 | 0,0263275  | yes |
| AN1328 | ChrVIII_A_nidulans_FGSC_A4:813406-814204 | WT_5hasex | WT_veg | OK     | 91,2222  | 136,411 | 0,580502   | -1,17587  | 0,239646   | 0,505471   | no  |
| AN1329 | ChrVIII_A_nidulans_FGSC_A4:809182-810926 | WT_5hasex | WT_veg | OK     | 2,11327  | 3,01481 | 0,512586   | -0,645256 | 0,518761   | 0,762614   | no  |
| AN1330 | ChrVIII_A_nidulans_FGSC_A4:807568-809159 | WT_5hasex | WT_veg | OK     | 279,42   | 1001,78 | 1,84206    | -3,53213  | 0,00041223 | 0,00369007 | yes |
| AN1331 | ChrVIII_A_nidulans_FGSC_A4:805457-806747 | WT_5hasex | WT_veg | OK     | 219,004  | 597,112 | 1,44704    | -2,91274  | 0,00358273 | 0,0226824  | yes |
| AN1334 | ChrVIII_A_nidulans_FGSC_A4:801469-802025 | WT_5hasex | WT_veg | OK     | 117,116  | 124,971 | 0,0936631  | -0,189395 | 0,849783   | 0,941019   | no  |
| AN1335 | ChrVIII_A_nidulans_FGSC_A4:799500-800883 | WT_5hasex | WT_veg | OK     | 60,5076  | 90,1139 | 0,574632   | -1,18397  | 0,236425   | 0,501767   | no  |
| AN1336 | ChrVIII_A_nidulans_FGSC_A4:797652-799143 | WT_5hasex | WT_veg | OK     | 19,1964  | 96,2553 | 2,32603    | -4,43559  | 9,1821E-06 | 0,00013347 | yes |
| AN1338 | ChrVIII_A_nidulans_FGSC_A4:791684-792344 | WT_5hasex | WT_veg | OK     | 413,817  | 605,954 | 0,550217   | -0,86402  | 0,387577   | 0,661096   | no  |
| AN1340 | ChrVIII_A_nidulans_FGSC_A4:784810-785833 | WT_5hasex | WT_veg | OK     | 83,44    | 212,384 | 1,34786    | -2,77058  | 0,0055957  | 0,0325734  | yes |
| AN1341 | ChrVIII_A_nidulans_FGSC_A4:783433-784522 | WT_5hasex | WT_veg | OK     | 94,4805  | 131,91  | 0,481468   | -0,99123  | 0,321573   | 0,597941   | no  |
| AN1342 | ChrVIII_A_nidulans_FGSC_A4:781191-782595 | WT_5hasex | WT_veg | OK     | 66,5877  | 306,972 | 2,20478    | -4,63054  | 3,6471E-06 | 5,8338E-05 | yes |
| AN1343 | ChrVIII_A_nidulans_FGSC_A4:778755-780360 | WT_5hasex | WT_veg | OK     | 37,5245  | 62,832  | 0,743665   | -1,52114  | 0,128224   | 0,342122   | no  |
| AN1344 | ChrVIII_A_nidulans_FGSC_A4:776444-778021 | WT_5hasex | WT_veg | OK     | 31,3768  | 108,517 | 1,79015    | -3,59173  | 0,00032848 | 0,00304013 | yes |
| AN1345 | ChrVIII_A_nidulans_FGSC_A4:775127-776198 | WT_5hasex | WT_veg | OK     | 2073,17  | 3253,98 | 0,650369   | -0,986498 | 0,323889   | 0,600389   | no  |
| AN1346 | ChrVIII_A_nidulans_FGSC_A4:774100-774921 | WT_5hasex | WT_veg | OK     | 24,4168  | 23,5028 | -0,0550446 | 0,0952521 | 0,924115   | 0,971362   | no  |
| AN1347 | ChrVIII_A_nidulans_FGSC_A4:773256-773683 | WT_5hasex | WT_veg | OK     | 17,5508  | 42,5659 | 1,27816    | -1,85107  | 0,0641599  | 0,211893   | no  |
| AN1348 | ChrVIII_A_nidulans_FGSC_A4:772047-772896 | WT_5hasex | WT_veg | OK     | 80,1832  | 198,291 | 1,30624    | -2,64332  | 0,00820974 | 0,0444842  | yes |
| AN1349 | ChrVIII_A_nidulans_FGSC_A4:768353-771833 | WT_5hasex | WT_veg | OK     | 37,297   | 66,0559 | 0,824626   | -1,71215  | 0,0868697  | 0,262678   | no  |
| AN1350 | ChrVIII_A_nidulans_FGSC_A4:766239-766842 | WT_5hasex | WT_veg | OK     | 31,1112  | 111,967 | 1,84757    | -3,26607  | 0,00109051 | 0,00843599 | yes |
| AN1351 | ChrVIII_A_nidulans_FGSC_A4:763535-765878 | WT_5hasex | WT_veg | OK     | 22,4551  | 37,8126 | 0,751821   | -1,52622  | 0,126955   | 0,339856   | no  |
| AN1352 | ChrVIII_A_nidulans_FGSC_A4:762686-763365 | WT_5hasex | WT_veg | OK     | 79,8978  | 142,246 | 0,832157   | -1,57219  | 0,115906   | 0,319904   | no  |
| AN1353 | ChrVIII_A_nidulans_FGSC_A4:761618-762323 | WT_5hasex | WT_veg | OK     | 30,0234  | 44,5131 | 0,56814    | -1,00568  | 0,314571   | 0,590829   | no  |
| AN1354 | ChrVIII_A_nidulans_FGSC_A4:757332-759693 | WT_5hasex | WT_veg | OK     | 13,6314  | 91,3092 | 2,74383    | -5,16894  | 2,3543E-07 | 5,0293E-06 | yes |
| AN1355 | ChrVIII_A_nidulans_FGSC_A4:755292-756651 | WT_5hasex | WT_veg | OK     | 18,8803  | 57,5758 | 1,60859    | -2,91036  | 0,00361008 | 0,022817   | yes |
| AN1356 | ChrVIII_A_nidulans_FGSC_A4:752780-754374 | WT_5hasex | WT_veg | OK     | 1025,38  | 3094,22 | 1,59341    | -2,12425  | 0,0336492  | 0,132633   | no  |
| AN1357 | ChrVIII_A_nidulans_FGSC_A4:750361-752626 | WT_5hasex | WT_veg | OK     | 73,0313  | 305,404 | 2,06413    | -4,24347  | 2,2009E-05 | 0,00029007 | yes |
| AN1358 | ChrVIII_A_nidulans_FGSC_A4:747335-750179 | WT_5hasex | WT_veg | OK     | 145,682  | 285,44  | 0,970365   | -1,9337   | 0,0531505  | 0,185272   | no  |
| AN1359 | ChrVIII_A_nidulans_FGSC_A4:743599-746479 | WT_5hasex | WT_veg | OK     | 9,82266  | 26,6386 | 1,43933    | -2,7236   | 0,00645741 | 0,0367023  | yes |
| AN1360 | ChrVIII_A_nidulans_FGSC_A4:742585-743071 | WT_5hasex | WT_veg | OK     | 8,66743  | 31,1315 | 1,8447     | -2,56286  | 0,0103813  | 0,0536701  | no  |
| AN1361 | ChrVIII_A_nidulans_FGSC_A4:739952-742094 | WT_5hasex | WT_veg | OK     | 11,2381  | 56,7845 | 2,33709    | -3,24031  | 0,00119399 | 0,00909018 | yes |
| AN1362 | ChrVIII_A_nidulans_FGSC_A4:739952-742094 | WT_5hasex | WT_veg | OK     | 69,0771  | 156,888 | 1,18345    | -2,41432  | 0,0157646  | 0,074354   | no  |
| AN1363 | ChrVIII_A_nidulans_FGSC_A4:736423-739616 | WT_5hasex | WT_veg | OK     | 25,4759  | 35,582  | 0,482014   | -0,934937 | 0,349821   | 0,6253     | no  |
| AN1364 | ChrVIII_A_nidulans_FGSC_A4:736423-739616 | WT_5hasex | WT_veg | OK     | 39,3633  | 227,939 | 2,53373    | -4,46647  | 7,9519E-06 | 0,00011721 | yes |
| AN1365 | ChrVIII_A_nidulans_FGSC_A4:735061-735878 | WT_5hasex | WT_veg | OK     | 112,6    | 297,089 | 1,39968    | -2,76957  | 0,00561295 | 0,032663   | yes |
| AN1366 | ChrVIII_A_nidulans_FGSC_A4:732540-734863 | WT_5hasex | WT_veg | OK     | 21,8851  | 72,6888 | 1,73178    | -3,49155  | 0,00048022 | 0,00420463 | yes |
| AN1368 | ChrVIII_A_nidulans_FGSC_A4:728166-729701 | WT_5hasex | WT_veg | OK     | 54,3121  | 86,9192 | 0,6784     | -1,36526  | 0,17217    | 0,414374   | no  |
| AN1369 | ChrVIII_A_nidulans_FGSC_A4:726316-727939 | WT_5hasex | WT_veg | OK     | 34,7352  | 28,2906 | -0,296077  | 0,592871  | 0,553268   | 0,784028   | no  |
| AN1371 | ChrVIII_A_nidulans_FGSC_A4:723525-724005 | WT_5hasex | WT_veg | OK     | 38,9858  | 47,6399 | 0,289222   | -0,496939 | 0,619232   | 0,824092   | no  |
| AN1372 | ChrVIII_A_nidulans_FGSC_A4:721157-723115 | WT_5hasex | WT_veg | OK     | 36,029   | 43,7574 | 0,280368   | -0,568931 | 0,569403   | 0,794786   | no  |
| AN1373 | ChrVIII_A_nidulans_FGSC_A4:718406-720164 | WT_5hasex | WT_veg | OK     | 4,55378  | 9,30645 | 1,03117    | -1,43288  | 0,151892   | 0,382261   | no  |
| AN1374 | ChrVIII_A_nidulans_FGSC_A4:700077-704071 | WT_5hasex | WT_veg | OK     | 12,2578  | 10,9757 | -0,159382  | 0,307817  | 0,758222   | 0,900103   | no  |
| AN1375 | ChrVIII_A_nidulans_FGSC_A4:697743-699578 | WT_5hasex | WT_veg | OK     | 20,6255  | 50,1004 | 1,28039    | -2,47889  | 0,0131793  | 0,0647557  | no  |
| AN1378 | ChrVIII_A_nidulans_FGSC_A4:690136-691514 | WT_5hasex | WT_veg | OK     | 2223,89  | 414,849 | -2,42242   | 3,49168   | 0,00047999 | 0,00420395 | yes |
| AN1380 | ChrVIII_A_nidulans_FGSC_A4:685110-687285 | WT_5hasex | WT_veg | OK     | 77,2323  | 146,626 | 0,92486    | -1,91333  | 0,0557064  | 0,191574   | no  |
| AN1381 | ChrVIII_A_nidulans_FGSC_A4:684276-684852 | WT_5hasex | WT_veg | OK     | 22,2514  | 59,6783 | 1,42331    | -2,35467  | 0,0185393  | 0,0840248  | no  |
| AN1382 | ChrVIII_A_nidulans_FGSC_A4:681451-682834 | WT_5hasex | WT_veg | OK     | 29,1563  | 57,2311 | 0,972994   | -1,90067  | 0,0573449  | 0,195561   | no  |
| AN1383 | ChrVIII_A_nidulans_FGSC_A4:679205-680495 | WT_5hasex | WT_veg | OK     | 108,179  | 177,986 | 0,718344   | -1,44417  | 0,148691   | 0,376776   | no  |



# Supplementary table 1

|        |                                          |           |        |        |         |         |             |            |            |            |     |
|--------|------------------------------------------|-----------|--------|--------|---------|---------|-------------|------------|------------|------------|-----|
| AN1385 | ChrVIII_A_nidulans_FGSC_A4:673199-674599 | WT_5hasex | WT_veg | OK     | 22,5685 | 24,8617 | 0,139613    | -0,265937  | 0,790288   | 0,91447    | no  |
| AN1386 | ChrVIII_A_nidulans_FGSC_A4:669895-672989 | WT_5hasex | WT_veg | OK     | 46,5632 | 69,0497 | 0,568444    | -1,18764   | 0,234976   | 0,500212   | no  |
| AN1387 | ChrVIII_A_nidulans_FGSC_A4:667798-668978 | WT_5hasex | WT_veg | OK     | 96,8576 | 194,017 | 1,00224     | -2,0762    | 0,0378751  | 0,14485    | no  |
| AN1389 | ChrVIII_A_nidulans_FGSC_A4:659874-663145 | WT_5hasex | WT_veg | OK     | 29,62   | 31,5706 | 0,0920098   | -0,185244  | 0,853037   | 0,942411   | no  |
| AN1390 | ChrVIII_A_nidulans_FGSC_A4:659147-659829 | WT_5hasex | WT_veg | OK     | 223,119 | 494,288 | 1,14754     | -2,3773    | 0,0174397  | 0,080242   | no  |
| AN1391 | ChrVIII_A_nidulans_FGSC_A4:655702-658835 | WT_5hasex | WT_veg | OK     | 18,7386 | 54,2758 | 1,5343      | -3,13809   | 0,00170053 | 0,0121919  | yes |
| AN1392 | ChrVIII_A_nidulans_FGSC_A4:654395-655346 | WT_5hasex | WT_veg | OK     | 38,0329 | 92,7317 | 1,28581     | -2,4656    | 0,0136783  | 0,0665647  | no  |
| AN1393 | ChrVIII_A_nidulans_FGSC_A4:653641-654217 | WT_5hasex | WT_veg | OK     | 83,2996 | 323,598 | 1,95782     | -3,88094   | 0,00010405 | 0,00113572 | yes |
| AN1396 | ChrVIII_A_nidulans_FGSC_A4:641946-644653 | WT_5hasex | WT_veg | OK     | 423,601 | 931,405 | 1,1367      | -1,95968   | 0,0500328  | 0,17763    | no  |
| AN1398 | ChrVIII_A_nidulans_FGSC_A4:632463-633004 | WT_5hasex | WT_veg | OK     | 58,0109 | 95,7766 | 0,723349    | -1,30449   | 0,192067   | 0,443333   | no  |
| AN1399 | ChrVIII_A_nidulans_FGSC_A4:630269-631985 | WT_5hasex | WT_veg | OK     | 14,7431 | 35,1351 | 1,25287     | -2,28235   | 0,0224687  | 0,0972016  | no  |
| AN1400 | ChrVIII_A_nidulans_FGSC_A4:628836-629708 | WT_5hasex | WT_veg | OK     | 52,0445 | 75,8778 | 0,543931    | -1,05656   | 0,290714   | 0,565459   | no  |
| AN1402 | ChrVIII_A_nidulans_FGSC_A4:619929-622076 | WT_5hasex | WT_veg | OK     | 44,3756 | 61,8389 | 0,47875     | -0,986312  | 0,32398    | 0,600506   | no  |
| AN1403 | ChrVIII_A_nidulans_FGSC_A4:618176-619393 | WT_5hasex | WT_veg | OK     | 71,8655 | 164,64  | 1,19595     | -2,46603   | 0,0136619  | 0,0665035  | no  |
| AN1404 | ChrVIII_A_nidulans_FGSC_A4:616201-617573 | WT_5hasex | WT_veg | OK     | 41,4199 | 106,065 | 1,35655     | -2,72379   | 0,00645374 | 0,0367023  | yes |
| AN1405 | ChrVII_A_nidulans_FGSC_A4:683952-686091  | WT_5hasex | WT_veg | OK     | 111,247 | 190,466 | 0,775773    | -1,59648   | 0,110381   | 0,309995   | no  |
| AN1406 | ChrVIII_A_nidulans_FGSC_A4:687112-690045 | WT_5hasex | WT_veg | OK     | 23,102  | 27,7899 | 0,266546    | -0,512313  | 0,608432   | 0,818333   | no  |
| AN1407 | ChrVII_A_nidulans_FGSC_A4:691912-692620  | WT_5hasex | WT_veg | OK     | 55,6634 | 61,5569 | 0,145194    | -0,278939  | 0,780292   | 0,910325   | no  |
| AN1408 | ChrVII_A_nidulans_FGSC_A4:692689-695863  | WT_5hasex | WT_veg | OK     | 43,8686 | 87,2211 | 0,991489    | -2,05562   | 0,0398193  | 0,150354   | no  |
| AN1409 | ChrVII_A_nidulans_FGSC_A4:696190-697799  | WT_5hasex | WT_veg | OK     | 235,303 | 499,175 | 1,08503     | -2,02493   | 0,0428749  | 0,158656   | no  |
| AN1411 | ChrVII_A_nidulans_FGSC_A4:702310-702889  | WT_5hasex | WT_veg | OK     | 46,3409 | 153,156 | 1,72465     | -2,95851   | 0,00309129 | 0,0200408  | yes |
| AN1412 | ChrVII_A_nidulans_FGSC_A4:702996-704913  | WT_5hasex | WT_veg | OK     | 29,847  | 77,1333 | 1,36977     | -2,75284   | 0,00590813 | 0,0340554  | yes |
| AN1413 | ChrVII_A_nidulans_FGSC_A4:705314-709912  | WT_5hasex | WT_veg | OK     | 24,2217 | 48,8783 | 1,0129      | -2,09236   | 0,0364066  | 0,140651   | no  |
| AN1415 | ChrVII_A_nidulans_FGSC_A4:714746-715350  | WT_5hasex | WT_veg | OK     | 13,3365 | 22,6793 | 0,765998    | -1,02164   | 0,306952   | 0,582997   | no  |
| AN1416 | ChrVII_A_nidulans_FGSC_A4:715906-718889  | WT_5hasex | WT_veg | OK     | 44,2283 | 45,6823 | 0,0466662   | -0,095552  | 0,923876   | 0,971309   | no  |
| AN1417 | ChrVII_A_nidulans_FGSC_A4:721698-722784  | WT_5hasex | WT_veg | OK     | 4,51569 | 5,43344 | 0,266919    | -0,313074  | 0,754224   | 0,898026   | no  |
| AN1418 | ChrVII_A_nidulans_FGSC_A4:722848-724404  | WT_5hasex | WT_veg | OK     | 235,821 | 99,2924 | -1,24794    | 2,34215    | 0,0191728  | 0,0861653  | no  |
| AN1419 | ChrVII_A_nidulans_FGSC_A4:725611-726777  | WT_5hasex | WT_veg | NOTEST | 0       | 0       | 0           | 0          | 1          | 1          | no  |
| AN1420 | ChrVII_A_nidulans_FGSC_A4:727570-730233  | WT_5hasex | WT_veg | OK     | 26,8496 | 58,843  | 1,13197     | -2,29488   | 0,02174    | 0,0949509  | no  |
| AN1421 | ChrVII_A_nidulans_FGSC_A4:731303-732944  | WT_5hasex | WT_veg | OK     | 6,64204 | 47,5423 | 2,83951     | -4,61395   | 3,9508E-06 | 6,2603E-05 | yes |
| AN1422 | ChrVII_A_nidulans_FGSC_A4:733259-733966  | WT_5hasex | WT_veg | OK     | 28,3437 | 62,0033 | 1,12932     | -1,87917   | 0,060221   | 0,202796   | no  |
| AN1423 | ChrVII_A_nidulans_FGSC_A4:735177-736785  | WT_5hasex | WT_veg | OK     | 13,301  | 55,9674 | 2,07305     | -3,60303   | 0,00031453 | 0,00293515 | yes |
| AN1424 | ChrVII_A_nidulans_FGSC_A4:737414-739749  | WT_5hasex | WT_veg | OK     | 20,0007 | 48,1515 | 1,26753     | -2,52047   | 0,0117199  | 0,0590357  | no  |
| AN1426 | ChrVII_A_nidulans_FGSC_A4:747536-749625  | WT_5hasex | WT_veg | OK     | 135,722 | 43,1237 | -1,6541     | 2,64355    | 0,00820428 | 0,0444592  | yes |
| AN1427 | ChrVII_A_nidulans_FGSC_A4:749743-752130  | WT_5hasex | WT_veg | OK     | 36,147  | 35,4148 | -0,0295243  | 0,0575788  | 0,954084   | 0,98293    | no  |
| AN1428 | ChrVII_A_nidulans_FGSC_A4:753385-754678  | WT_5hasex | WT_veg | OK     | 56,851  | 96,4224 | 0,762183    | -1,52982   | 0,126061   | 0,338207   | no  |
| AN1430 | ChrVII_A_nidulans_FGSC_A4:757763-759372  | WT_5hasex | WT_veg | OK     | 59,6504 | 143,91  | 1,27056     | -2,65881   | 0,00784163 | 0,0428977  | yes |
| AN1431 | ChrVII_A_nidulans_FGSC_A4:760581-761631  | WT_5hasex | WT_veg | OK     | 14,6556 | 27,1792 | 0,891053    | -1,5092    | 0,131248   | 0,347322   | no  |
| AN1432 | ChrVII_A_nidulans_FGSC_A4:761819-763074  | WT_5hasex | WT_veg | OK     | 10,6645 | 23,1219 | 1,11644     | -1,75729   | 0,0788686  | 0,245332   | no  |
| AN1433 | ChrVII_A_nidulans_FGSC_A4:764070-765796  | WT_5hasex | WT_veg | OK     | 15,9851 | 17,742  | 0,150441    | -0,2624    | 0,793013   | 0,915902   | no  |
| AN1434 | ChrVII_A_nidulans_FGSC_A4:765967-768761  | WT_5hasex | WT_veg | OK     | 10,3952 | 125,581 | 3,59462     | -6,82758   | 8,6358E-12 | 4,1517E-10 | yes |
| AN1435 | ChrVII_A_nidulans_FGSC_A4:770263-772711  | WT_5hasex | WT_veg | OK     | 15,3663 | 39,0615 | 1,34598     | -2,59138   | 0,00955927 | 0,0502634  | no  |
| AN1436 | ChrVII_A_nidulans_FGSC_A4:772965-775551  | WT_5hasex | WT_veg | OK     | 24,4672 | 52,8743 | 1,11172     | -2,28719   | 0,0221845  | 0,0962867  | no  |
| AN1437 | ChrVII_A_nidulans_FGSC_A4:776928-780471  | WT_5hasex | WT_veg | OK     | 22,5357 | 22,5121 | -0,00150936 | 0,00306938 | 0,997551   | 0,999153   | no  |
| AN1438 | ChrVII_A_nidulans_FGSC_A4:781905-783674  | WT_5hasex | WT_veg | OK     | 31,4841 | 136,54  | 2,11663     | -3,78262   | 0,00015519 | 0,0016002  | yes |
| AN1439 | ChrVII_A_nidulans_FGSC_A4:784457-785171  | WT_5hasex | WT_veg | OK     | 46,9963 | 70,8908 | 0,593051    | -1,10026   | 0,27122    | 0,54354    | no  |
| AN1441 | ChrVII_A_nidulans_FGSC_A4:792879-795058  | WT_5hasex | WT_veg | OK     | 1,71055 | 4,2166  | 1,30162     | -1,60516   | 0,108458   | 0,3065     | no  |
| AN1442 | ChrVII_A_nidulans_FGSC_A4:795804-797178  | WT_5hasex | WT_veg | OK     | 109,506 | 220,769 | 1,01153     | -2,09285   | 0,0363622  | 0,140569   | no  |
| AN1443 | ChrVII_A_nidulans_FGSC_A4:797626-801781  | WT_5hasex | WT_veg | OK     | 50,6107 | 27,9805 | -0,855021   | 1,4947     | 0,134993   | 0,354032   | no  |
| AN1444 | ChrVII_A_nidulans_FGSC_A4:803151-803919  | WT_5hasex | WT_veg | OK     | 257,288 | 468,231 | 0,863838    | -1,78135   | 0,0748554  | 0,236257   | no  |
| AN1445 | ChrVII_A_nidulans_FGSC_A4:804050-805425  | WT_5hasex | WT_veg | OK     | 18,8345 | 41,8202 | 1,15082     | -2,07663   | 0,0378354  | 0,14473    | no  |
| AN1447 | ChrVII_A_nidulans_FGSC_A4:807812-809223  | WT_5hasex | WT_veg | OK     | 31,33   | 80,7011 | 1,36504     | -2,48046   | 0,0131212  | 0,0645248  | no  |
| AN1448 | ChrVII_A_nidulans_FGSC_A4:809435-811549  | WT_5hasex | WT_veg | OK     | 19,8074 | 65,7294 | 1,7305      | -3,47917   | 0,00050298 | 0,0043746  | yes |

# Supplementary table 1

|         |                                           |           |        |        |          |          |              |              |            |            |     |
|---------|-------------------------------------------|-----------|--------|--------|----------|----------|--------------|--------------|------------|------------|-----|
| AN1449  | ChrVII_A_nidulans_FGSC_A4:813163-814583   | WT_5hasex | WT_veg | OK     | 420,332  | 613,867  | 0,546394     | -1,03172     | 0,302203   | 0,578089   | no  |
| AN1450  | ChrVII_A_nidulans_FGSC_A4:815409-816978   | WT_5hasex | WT_veg | OK     | 414,158  | 414,951  | 0,0027576    | -0,00490553  | 0,996086   | 0,998525   | no  |
| AN1451  | ChrVII_A_nidulans_FGSC_A4:818014-819230   | WT_5hasex | WT_veg | OK     | 87,2744  | 193,408  | 1,14801      | -2,12185     | 0,0338503  | 0,13328    | no  |
| AN1452  | ChrVII_A_nidulans_FGSC_A4:819518-821241   | WT_5hasex | WT_veg | OK     | 16,822   | 91,3971  | 2,4418       | -4,62141     | 3,8114E-06 | 6,0652E-05 | yes |
| AN1453  | ChrVII_A_nidulans_FGSC_A4:822478-824729   | WT_5hasex | WT_veg | OK     | 15,2553  | 32,5086  | 1,09151      | -2,08512     | 0,0370581  | 0,142558   | no  |
| AN1455  | ChrVII_A_nidulans_FGSC_A4:830813-833417   | WT_5hasex | WT_veg | OK     | 62,6804  | 63,894   | 0,0276656    | -0,0562909   | 0,95511    | 0,983352   | no  |
| AN1456  | ChrVII_A_nidulans_FGSC_A4:835254-837986   | WT_5hasex | WT_veg | OK     | 28,5682  | 35,4699  | 0,312186     | -0,634643    | 0,525661   | 0,766934   | no  |
| AN1457  | ChrVII_A_nidulans_FGSC_A4:838586-840444   | WT_5hasex | WT_veg | OK     | 15,4682  | 36,6002  | 1,24255      | -2,13492     | 0,0327673  | 0,129869   | no  |
| AN1458  | ChrVII_A_nidulans_FGSC_A4:842293-843726   | WT_5hasex | WT_veg | OK     | 33,3327  | 33,5109  | 0,00769213   | -0,0152836   | 0,987806   | 0,995529   | no  |
| AN1460  | ChrVII_A_nidulans_FGSC_A4:846762-847992   | WT_5hasex | WT_veg | OK     | 30,5734  | 57,3597  | 0,90776      | -1,71749     | 0,0858896  | 0,260725   | no  |
| AN1461  | ChrVII_A_nidulans_FGSC_A4:848517-850275   | WT_5hasex | WT_veg | OK     | 25,388   | 22,8076  | -0,154636    | 0,308501     | 0,757701   | 0,899896   | no  |
| AN1462  | ChrVII_A_nidulans_FGSC_A4:851053-854763   | WT_5hasex | WT_veg | OK     | 24,4191  | 51,2651  | 1,06997      | -2,21363     | 0,0268545  | 0,111384   | no  |
| AN1463  | ChrVII_A_nidulans_FGSC_A4:859259-860668   | WT_5hasex | WT_veg | OK     | 13,9855  | 22,015   | 0,654557     | -1,10136     | 0,270741   | 0,542948   | no  |
| AN1465  | ChrVII_A_nidulans_FGSC_A4:866537-868682   | WT_5hasex | WT_veg | OK     | 228,79   | 230,25   | 0,00917935   | -0,0178558   | 0,985754   | 0,994752   | no  |
| AN1466  | ChrVII_A_nidulans_FGSC_A4:869363-872009   | WT_5hasex | WT_veg | OK     | 51,4269  | 103,786  | 1,01302      | -2,1097      | 0,0348845  | 0,136267   | no  |
| AN1467  | ChrVII_A_nidulans_FGSC_A4:873483-875185   | WT_5hasex | WT_veg | OK     | 20,7011  | 251,018  | 3,60001      | -7,02618     | 2,1228E-12 | 1,1216E-10 | yes |
| AN1468  | ChrVII_A_nidulans_FGSC_A4:875825-877581   | WT_5hasex | WT_veg | OK     | 21,8062  | 112,267  | 2,36412      | -4,6342      | 3,5832E-06 | 5,7509E-05 | yes |
| AN1469  | ChrVII_A_nidulans_FGSC_A4:877974-878814   | WT_5hasex | WT_veg | OK     | 85,6008  | 298,41   | 1,8016       | -3,72796     | 0,00019304 | 0,00193301 | yes |
| AN1470  | ChrVII_A_nidulans_FGSC_A4:880264-881871   | WT_5hasex | WT_veg | OK     | 33,5762  | 13,7931  | -1,2835      | 2,49636      | 0,0125476  | 0,0623242  | no  |
| AN1471  | ChrVII_A_nidulans_FGSC_A4:883217-883786   | WT_5hasex | WT_veg | OK     | 21,9287  | 45,7668  | 1,06148      | -1,59642     | 0,110395   | 0,310016   | no  |
| AN1472  | ChrVII_A_nidulans_FGSC_A4:885940-887128   | WT_5hasex | WT_veg | OK     | 240,984  | 303,681  | 0,333623     | -0,671437    | 0,501942   | 0,751079   | no  |
| AN1474  | ChrVII_A_nidulans_FGSC_A4:890324-891557   | WT_5hasex | WT_veg | OK     | 7,75106  | 47,0378  | 2,60136      | -4,00572     | 6,1829E-05 | 0,00072159 | yes |
| AN1477  | ChrVII_A_nidulans_FGSC_A4:902082-903582   | WT_5hasex | WT_veg | OK     | 1,69484  | 6,03547  | 1,83232      | -2,16527     | 0,0303667  | 0,122453   | no  |
| AN1479  | ChrVII_A_nidulans_FGSC_A4:915347-918379   | WT_5hasex | WT_veg | OK     | 10,4075  | 11,2913  | 0,117588     | -0,221186    | 0,824948   | 0,930161   | no  |
| AN1480  | ChrVII_A_nidulans_FGSC_A4:918483-919251   | WT_5hasex | WT_veg | OK     | 22,264   | 94,7046  | 2,08872      | -3,4817      | 0,00049824 | 0,00434065 | yes |
| AN1481  | ChrVII_A_nidulans_FGSC_A4:920527-922465   | WT_5hasex | WT_veg | OK     | 13,9668  | 22,7196  | 0,701937     | -1,26665     | 0,205281   | 0,461799   | no  |
| AN1482  | ChrVII_A_nidulans_FGSC_A4:923267-925594   | WT_5hasex | WT_veg | OK     | 4,07438  | 9,8201   | 1,27032      | -1,96487     | 0,049429   | 0,176177   | no  |
| AN1483  | ChrVII_A_nidulans_FGSC_A4:925973-927166   | WT_5hasex | WT_veg | OK     | 76,0356  | 146,7    | 0,948121     | -1,93159     | 0,05341    | 0,185892   | no  |
| AN1485  | ChrVII_A_nidulans_FGSC_A4:933146-934523   | WT_5hasex | WT_veg | OK     | 114,843  | 141,691  | 0,30309      | -0,62671     | 0,530849   | 0,7701     | no  |
| AN1486  | ChrVII_A_nidulans_FGSC_A4:934787-936024   | WT_5hasex | WT_veg | OK     | 15,0876  | 24,5151  | 0,700308     | -1,20641     | 0,22766    | 0,490703   | no  |
| AN1488  | ChrVII_A_nidulans_FGSC_A4:941882-944610   | WT_5hasex | WT_veg | OK     | 44,5501  | 51,0157  | 0,195513     | -0,406383    | 0,684462   | 0,861135   | no  |
| AN1489  | ChrVII_A_nidulans_FGSC_A4:945020-946804   | WT_5hasex | WT_veg | OK     | 11,1327  | 7,58616  | -0,553358    | 0,91043      | 0,362596   | 0,637395   | no  |
| AN1490  | ChrVII_A_nidulans_FGSC_A4:947188-948279   | WT_5hasex | WT_veg | OK     | 245,261  | 570,077  | 1,21684      | -2,36029     | 0,0182606  | 0,083038   | no  |
| AN1492  | ChrVII_A_nidulans_FGSC_A4:955057-957205   | WT_5hasex | WT_veg | NOTEST | 0,876268 | 0,643893 | -0,444551    | 0,243225     | 0,807831   | 1          | no  |
| AN1493  | ChrVII_A_nidulans_FGSC_A4:955057-957205   | WT_5hasex | WT_veg | OK     | 204,234  | 295,241  | 0,53167      | -1,091       | 0,275272   | 0,548317   | no  |
| AN1494  | ChrVII_A_nidulans_FGSC_A4:963845-967856   | WT_5hasex | WT_veg | OK     | 19,518   | 28,3037  | 0,536187     | -1,10987     | 0,267054   | 0,538657   | no  |
| AN1495  | ChrVII_A_nidulans_FGSC_A4:968266-969118   | WT_5hasex | WT_veg | OK     | 251,043  | 379,43   | 0,595899     | -1,23645     | 0,21629    | 0,476417   | no  |
| AN1497  | ChrVII_A_nidulans_FGSC_A4:975786-977357   | WT_5hasex | WT_veg | NOTEST | 1,06277  | 1,97575  | 0,894572     | -0,905621    | 0,365136   | 1          | no  |
| AN1498  | ChrVII_A_nidulans_FGSC_A4:977779-979285   | WT_5hasex | WT_veg | OK     | 19,606   | 33,0084  | 0,751539     | -1,38162     | 0,167087   | 0,406235   | no  |
| AN1499  | ChrVII_A_nidulans_FGSC_A4:980233-981181   | WT_5hasex | WT_veg | OK     | 0,321225 | 4,49301  | 3,80603      | -2,35775     | 0,018386   | 0,0835178  | no  |
| AN1500  | ChrVII_A_nidulans_FGSC_A4:981315-983757   | WT_5hasex | WT_veg | OK     | 43,2033  | 333,869  | 2,95007      | -6,12526     | 9,0538E-10 | 3,2385E-08 | yes |
| AN15000 | Contig-mt188_A_nidulans_FGSC_A4:0-1083    | WT_5hasex | WT_veg | NOTEST | 0        | 0        | 0            | 0            | 1          | 1          | no  |
| AN1501  | ChrVII_A_nidulans_FGSC_A4:988207-990128   | WT_5hasex | WT_veg | NOTEST | 0        | 1,11625  | 1.79769e+308 | 1.79769e+308 | 0,123323   | 1          | no  |
| AN1503  | ChrVII_A_nidulans_FGSC_A4:997297-998479   | WT_5hasex | WT_veg | OK     | 33,9888  | 19,9966  | -0,765309    | 1,36875      | 0,171078   | 0,412631   | no  |
| AN1504  | ChrVII_A_nidulans_FGSC_A4:1000202-1003074 | WT_5hasex | WT_veg | OK     | 9,46125  | 16,3982  | 0,793434     | -1,48462     | 0,137644   | 0,358579   | no  |
| AN1505  | ChrVII_A_nidulans_FGSC_A4:1003416-1005142 | WT_5hasex | WT_veg | OK     | 25,0266  | 42,9241  | 0,778326     | -1,46991     | 0,141586   | 0,365057   | no  |
| AN1506  | ChrVII_A_nidulans_FGSC_A4:1006399-1008187 | WT_5hasex | WT_veg | OK     | 47,6404  | 19,2434  | -1,30782     | 2,21208      | 0,0269614  | 0,111678   | no  |
| AN1507  | ChrVII_A_nidulans_FGSC_A4:1008321-1009011 | WT_5hasex | WT_veg | OK     | 10,3159  | 32,4767  | 1,65453      | -2,48501     | 0,0129546  | 0,063908   | no  |
| AN1508  | ChrVII_A_nidulans_FGSC_A4:1009249-1010447 | WT_5hasex | WT_veg | OK     | 10,5504  | 20,4125  | 0,952158     | -1,54838     | 0,121532   | 0,330488   | no  |
| AN1509  | ChrVII_A_nidulans_FGSC_A4:1012769-1014056 | WT_5hasex | WT_veg | OK     | 118,201  | 56,8636  | -1,05566     | 2,133        | 0,0329244  | 0,13034    | no  |
| AN1510  | ChrVII_A_nidulans_FGSC_A4:1015218-1017495 | WT_5hasex | WT_veg | OK     | 403,621  | 254,423  | -0,665773    | 1,16814      | 0,24275    | 0,509639   | no  |
| AN1514  | ChrVII_A_nidulans_FGSC_A4:1025428-1027168 | WT_5hasex | WT_veg | OK     | 15,4555  | 67,0238  | 2,11656      | -3,84112     | 0,00012247 | 0,00131137 | yes |
| AN1515  | ChrVII_A_nidulans_FGSC_A4:1038947-1040193 | WT_5hasex | WT_veg | OK     | 66,0641  | 92,7806  | 0,489956     | -0,976203    | 0,328964   | 0,605471   | no  |

## Supplementary table 1

|        |                                           |           |        |         |          |          |               |               |            |            |     |
|--------|-------------------------------------------|-----------|--------|---------|----------|----------|---------------|---------------|------------|------------|-----|
| AN1517 | ChrVII_A_nidulans_FGSC_A4:1045668-1047220 | WT_5hasex | WT_veg | OK      | 16,5182  | 65,4776  | 1,98695       | -3,66621      | 0,00024617 | 0,0023827  | yes |
| AN1518 | ChrVII_A_nidulans_FGSC_A4:1047403-1051430 | WT_5hasex | WT_veg | OK      | 44,9385  | 174,88   | 1,96034       | -4,03044      | 5,5672E-05 | 0,00065734 | yes |
| AN1520 | ChrVII_A_nidulans_FGSC_A4:1056691-1058706 | WT_5hasex | WT_veg | OK      | 20,6     | 57,4056  | 1,47855       | -2,92777      | 0,00341399 | 0,0218038  | yes |
| AN1521 | ChrVII_A_nidulans_FGSC_A4:1059686-1060663 | WT_5hasex | WT_veg | OK      | 57,3424  | 91,588   | 0,675558      | -1,3408       | 0,179986   | 0,426252   | no  |
| AN1522 | ChrVII_A_nidulans_FGSC_A4:1061137-1061884 | WT_5hasex | WT_veg | OK      | 127,135  | 180,367  | 0,504575      | -1,03379      | 0,301236   | 0,576912   | no  |
| AN1523 | ChrVII_A_nidulans_FGSC_A4:1062741-1065334 | WT_5hasex | WT_veg | OK      | 823,445  | 1304,87  | 0,66416       | -1,05742      | 0,290318   | 0,564981   | no  |
| AN1524 | ChrVII_A_nidulans_FGSC_A4:1065761-1067258 | WT_5hasex | WT_veg | OK      | 57,4116  | 195,598  | 1,76848       | -3,46742      | 0,00052547 | 0,0045401  | yes |
| AN1525 | ChrVII_A_nidulans_FGSC_A4:1067398-1068212 | WT_5hasex | WT_veg | OK      | 55,5544  | 60,084   | 0,113078      | -0,208783     | 0,834618   | 0,934206   | no  |
| AN1526 | ChrVII_A_nidulans_FGSC_A4:1068493-1069564 | WT_5hasex | WT_veg | OK      | 33,1316  | 47,4451  | 0,51805       | -0,953892     | 0,340138   | 0,615834   | no  |
| AN1527 | ChrVII_A_nidulans_FGSC_A4:1069649-1070576 | WT_5hasex | WT_veg | OK      | 94,0659  | 417,912  | 2,15146       | -4,45032      | 8,5743E-06 | 0,00012544 | yes |
| AN1528 | ChrVII_A_nidulans_FGSC_A4:1070834-1074449 | WT_5hasex | WT_veg | OK      | 15,2763  | 20,8818  | 0,450951      | -0,901906     | 0,367107   | 0,64203    | no  |
| AN1529 | ChrVII_A_nidulans_FGSC_A4:1074797-1076315 | WT_5hasex | WT_veg | NOTEST  | 0,1243   | 1,06932  | 3,1048        | -1,4251       | 0,154128   | 1          | no  |
| AN1530 | ChrVII_A_nidulans_FGSC_A4:1077313-1078683 | WT_5hasex | WT_veg | LOWDATA | 6,28552  | 35,4348  | 2,49506       | 0             | 1          | 1          | no  |
| AN1531 | ChrVII_A_nidulans_FGSC_A4:1077313-1078683 | WT_5hasex | WT_veg | OK      | 7,37755  | 20,5543  | 1,47823       | -2,15453      | 0,0311983  | 0,125126   | no  |
| AN1532 | ChrVII_A_nidulans_FGSC_A4:1079638-1080560 | WT_5hasex | WT_veg | NOTEST  | 0,267387 | 0        | -1.79769e+308 | -1.79769e+308 | 0,224063   | 1          | no  |
| AN1533 | ChrVII_A_nidulans_FGSC_A4:1081260-1084203 | WT_5hasex | WT_veg | OK      | 9,45193  | 46,6972  | 2,30465       | -3,98792      | 6,6656E-05 | 0,00077005 | yes |
| AN1534 | ChrVII_A_nidulans_FGSC_A4:1084403-1085443 | WT_5hasex | WT_veg | OK      | 627,026  | 1045     | 0,7369        | -1,40259      | 0,160738   | 0,396339   | no  |
| AN1535 | ChrVII_A_nidulans_FGSC_A4:1086283-1087972 | WT_5hasex | WT_veg | OK      | 16,0037  | 34,5889  | 1,1119        | -1,96384      | 0,0495489  | 0,176474   | no  |
| AN1536 | ChrVII_A_nidulans_FGSC_A4:1090494-1092933 | WT_5hasex | WT_veg | OK      | 59,4003  | 102,505  | 0,787155      | -1,46218      | 0,143693   | 0,368818   | no  |
| AN1537 | ChrVII_A_nidulans_FGSC_A4:1097859-1099753 | WT_5hasex | WT_veg | OK      | 24,8333  | 52,2699  | 1,0737        | -2,1345       | 0,0328023  | 0,129974   | no  |
| AN1538 | ChrVII_A_nidulans_FGSC_A4:1100109-1101380 | WT_5hasex | WT_veg | OK      | 42,3845  | 157,039  | 1,88952       | -3,80353      | 0,00014265 | 0,00149026 | yes |
| AN1540 | ChrVII_A_nidulans_FGSC_A4:1104009-1105040 | WT_5hasex | WT_veg | OK      | 43,2562  | 44,1956  | 0,030996      | -0,0597772    | 0,952333   | 0,982276   | no  |
| AN1541 | ChrVII_A_nidulans_FGSC_A4:1107608-1109242 | WT_5hasex | WT_veg | OK      | 23,7185  | 20,7241  | -0,1947       | 0,372922      | 0,709207   | 0,874574   | no  |
| AN1543 | ChrVII_A_nidulans_FGSC_A4:1115118-1117496 | WT_5hasex | WT_veg | OK      | 907,174  | 743,41   | -0,287221     | 0,366548      | 0,713957   | 0,877034   | no  |
| AN1544 | ChrVII_A_nidulans_FGSC_A4:1117720-1118761 | WT_5hasex | WT_veg | OK      | 33,1051  | 76,1696  | 1,20216       | -2,33243      | 0,0196783  | 0,0880226  | no  |
| AN1545 | ChrVII_A_nidulans_FGSC_A4:1119971-1122380 | WT_5hasex | WT_veg | OK      | 109,394  | 226,091  | 1,04737       | -2,07334      | 0,038141   | 0,145622   | no  |
| AN1546 | ChrVII_A_nidulans_FGSC_A4:1123352-1128806 | WT_5hasex | WT_veg | OK      | 30,0569  | 65,4016  | 1,12163       | -2,30621      | 0,0210986  | 0,0928538  | no  |
| AN1548 | ChrVII_A_nidulans_FGSC_A4:1132064-1132925 | WT_5hasex | WT_veg | OK      | 27,1058  | 27,2741  | 0,0089296     | -0,0153637    | 0,987742   | 0,995529   | no  |
| AN1549 | ChrVII_A_nidulans_FGSC_A4:1133712-1134335 | WT_5hasex | WT_veg | OK      | 2995,78  | 2161,12  | -0,471154     | 0,741026      | 0,458678   | 0,71907    | no  |
| AN1550 | ChrVII_A_nidulans_FGSC_A4:1135954-1138240 | WT_5hasex | WT_veg | OK      | 15,724   | 19,4776  | 0,30885       | -0,562924     | 0,573487   | 0,7971     | no  |
| AN1552 | ChrVII_A_nidulans_FGSC_A4:1144656-1145750 | WT_5hasex | WT_veg | OK      | 2,72989  | 1,8995   | -0,52322      | 0,527776      | 0,597655   | 0,811755   | no  |
| AN1553 | ChrVII_A_nidulans_FGSC_A4:1146752-1147229 | WT_5hasex | WT_veg | OK      | 1,45167  | 7,27167  | 2,32457       | -2,03646      | 0,0417046  | 0,155478   | no  |
| AN1554 | ChrVII_A_nidulans_FGSC_A4:1148124-1150334 | WT_5hasex | WT_veg | OK      | 35,2814  | 58,8872  | 0,739046      | -1,52835      | 0,126426   | 0,338769   | no  |
| AN1557 | ChrVII_A_nidulans_FGSC_A4:1164064-1165806 | WT_5hasex | WT_veg | OK      | 5,40486  | 5,73478  | 0,0854804     | -0,122934     | 0,902159   | 0,962301   | no  |
| AN1559 | ChrVII_A_nidulans_FGSC_A4:1172337-1173741 | WT_5hasex | WT_veg | OK      | 52,8767  | 113,593  | 1,10317       | -2,13746      | 0,0325606  | 0,12927    | no  |
| AN1561 | ChrVII_A_nidulans_FGSC_A4:1178205-1178930 | WT_5hasex | WT_veg | OK      | 40,6188  | 133,12   | 1,71251       | -3,12231      | 0,00179436 | 0,0127513  | yes |
| AN1562 | ChrVII_A_nidulans_FGSC_A4:1180691-1181615 | WT_5hasex | WT_veg | OK      | 13,9028  | 20,5645  | 0,564783      | -0,921138     | 0,356978   | 0,63217    | no  |
| AN1563 | ChrVII_A_nidulans_FGSC_A4:1186320-1187620 | WT_5hasex | WT_veg | OK      | 24,557   | 73,5525  | 1,58264       | -2,67895      | 0,00738536 | 0,040871   | yes |
| AN1564 | ChrVII_A_nidulans_FGSC_A4:1187967-1190667 | WT_5hasex | WT_veg | OK      | 2,26267  | 3,02992  | 0,421256      | -0,583491     | 0,559563   | 0,788664   | no  |
| AN1565 | ChrVII_A_nidulans_FGSC_A4:1190950-1192448 | WT_5hasex | WT_veg | OK      | 10,5766  | 19,5361  | 0,885267      | -1,48564      | 0,137373   | 0,358159   | no  |
| AN1566 | ChrVII_A_nidulans_FGSC_A4:1192503-1193470 | WT_5hasex | WT_veg | OK      | 11,9674  | 8,26261  | -0,534443     | 0,778818      | 0,436087   | 0,701385   | no  |
| AN1567 | ChrVII_A_nidulans_FGSC_A4:1195188-1195921 | WT_5hasex | WT_veg | OK      | 7,94445  | 2,51376  | -1,6601       | 1,50215       | 0,133059   | 0,350788   | no  |
| AN1568 | ChrVII_A_nidulans_FGSC_A4:1197165-1199094 | WT_5hasex | WT_veg | OK      | 2,67534  | 1,43981  | -0,893838     | 1,0215        | 0,307018   | 0,583058   | no  |
| AN1569 | ChrVII_A_nidulans_FGSC_A4:1200986-1203141 | WT_5hasex | WT_veg | OK      | 3,1621   | 3,41603  | 0,111436      | -0,157162     | 0,875117   | 0,952199   | no  |
| AN1572 | ChrVII_A_nidulans_FGSC_A4:1213428-1214759 | WT_5hasex | WT_veg | OK      | 17,0104  | 31,8672  | 0,905656      | -1,56499      | 0,117586   | 0,32318    | no  |
| AN1573 | ChrVII_A_nidulans_FGSC_A4:1214927-1216429 | WT_5hasex | WT_veg | OK      | 22,0962  | 36,4982  | 0,724026      | -1,3769       | 0,168542   | 0,408546   | no  |
| AN1574 | ChrVII_A_nidulans_FGSC_A4:1218132-1218897 | WT_5hasex | WT_veg | OK      | 24,1499  | 54,6501  | 1,17821       | -2,00095      | 0,0453981  | 0,165642   | no  |
| AN1575 | ChrVII_A_nidulans_FGSC_A4:1220048-1222762 | WT_5hasex | WT_veg | NOTEST  | 1,10659  | 0        | -1.79769e+308 | -1.79769e+308 | 0,0534878  | 1          | no  |
| AN1576 | ChrVII_A_nidulans_FGSC_A4:1225560-1226990 | WT_5hasex | WT_veg | NOTEST  | 0        | 0        | 0             | 0             | 1          | 1          | no  |
| AN1577 | ChrVII_A_nidulans_FGSC_A4:1231209-1233194 | WT_5hasex | WT_veg | NOTEST  | 0,271033 | 0,499545 | 0,882148      | -0,489989     | 0,624142   | 1          | no  |
| AN1578 | ChrVII_A_nidulans_FGSC_A4:1234012-1236860 | WT_5hasex | WT_veg | OK      | 11,0451  | 31,8161  | 1,52634       | -2,89777      | 0,00375823 | 0,0235882  | yes |
| AN1579 | ChrVII_A_nidulans_FGSC_A4:1239132-1240691 | WT_5hasex | WT_veg | OK      | 1,06071  | 6,24402  | 2,55744       | -2,88947      | 0,00385898 | 0,0240851  | yes |
| AN1580 | ChrVII_A_nidulans_FGSC_A4:1242795-1246333 | WT_5hasex | WT_veg | NOTEST  | 2,04864  | 2,71919  | 0,408506      | -0,504013     | 0,614253   | 1          | no  |

# Supplementary table 1

|        |                                           |           |        |        |           |           |               |               |            |            |     |
|--------|-------------------------------------------|-----------|--------|--------|-----------|-----------|---------------|---------------|------------|------------|-----|
| AN1581 | ChrVII_A_nidulans_FGSC_A4:1248849-1250516 | WT_5hasex | WT_veg | NOTEST | 1,88079   | 1,03924   | -0,855809     | 0,80175       | 0,422698   | 1          | no  |
| AN1582 | ChrVII_A_nidulans_FGSC_A4:1251058-1252444 | WT_5hasex | WT_veg | NOTEST | 1,0184    | 1,77495   | 0,801468      | -0,799332     | 0,424098   | 1          | no  |
| AN1583 | ChrVII_A_nidulans_FGSC_A4:1252700-1254013 | WT_5hasex | WT_veg | OK     | 6,58415   | 20,889    | 1,66567       | -2,22055      | 0,0263817  | 0,109927   | no  |
| AN1584 | ChrVII_A_nidulans_FGSC_A4:1254519-1256821 | WT_5hasex | WT_veg | OK     | 13,7125   | 29,142    | 1,08761       | -1,71214      | 0,0868708  | 0,262678   | no  |
| AN1585 | ChrVII_A_nidulans_FGSC_A4:1257247-1258923 | WT_5hasex | WT_veg | NOTEST | 0,758264  | 2,71256   | 1,83888       | -1,73964      | 0,081923   | 1          | no  |
| AN1586 | ChrVII_A_nidulans_FGSC_A4:1259975-1262157 | WT_5hasex | WT_veg | OK     | 3,37609   | 13,8852   | 2,04012       | -2,66284      | 0,00774849 | 0,0424946  | yes |
| AN1587 | ChrVII_A_nidulans_FGSC_A4:1263054-1264809 | WT_5hasex | WT_veg | OK     | 3,74517   | 4,99477   | 0,415387      | -0,565089     | 0,572013   | 0,796259   | no  |
| AN1588 | ChrVII_A_nidulans_FGSC_A4:1265062-1267718 | WT_5hasex | WT_veg | OK     | 7,30522   | 8,45137   | 0,210256      | -0,318128     | 0,750387   | 0,895993   | no  |
| AN1589 | ChrVII_A_nidulans_FGSC_A4:1267857-1270442 | WT_5hasex | WT_veg | OK     | 2,30328   | 2,01708   | -0,191425     | 0,238951      | 0,811143   | 0,924335   | no  |
| AN1590 | ChrVII_A_nidulans_FGSC_A4:1271963-1274067 | WT_5hasex | WT_veg | NOTEST | 0,115911  | 0,823011  | 2,82789       | -1,36972      | 0,170775   | 1          | no  |
| AN1591 | ChrVII_A_nidulans_FGSC_A4:1274968-1278249 | WT_5hasex | WT_veg | NOTEST | 0,436409  | 2,154     | 2,30326       | -2,66099      | 0,00779103 | 1          | no  |
| AN1592 | ChrVII_A_nidulans_FGSC_A4:1279630-1280998 | WT_5hasex | WT_veg | NOTEST | 0,147644  | 0         | -1.79769e+308 | -1.79769e+308 | 0,165569   | 1          | no  |
| AN1593 | ChrVII_A_nidulans_FGSC_A4:1282755-1284065 | WT_5hasex | WT_veg | OK     | 12,6888   | 2,71733   | -2,2233       | 3,05001       | 0,00228837 | 0,0156064  | yes |
| AN1594 | ChrVII_A_nidulans_FGSC_A4:1284404-1287460 | WT_5hasex | WT_veg | NOTEST | 0,0806641 | 0,0611783 | -0,398906     | 0,114813      | 0,908593   | 1          | no  |
| AN1595 | ChrVII_A_nidulans_FGSC_A4:1288246-1289242 | WT_5hasex | WT_veg | NOTEST | 0         | 0,801018  | 1.79769e+308  | 1.79769e+308  | 0,134707   | 1          | no  |
| AN1596 | ChrVII_A_nidulans_FGSC_A4:1289467-1290523 | WT_5hasex | WT_veg | OK     | 37,3137   | 34,3164   | -0,120805     | 0,233279      | 0,815545   | 0,926118   | no  |
| AN1597 | ChrVII_A_nidulans_FGSC_A4:1290792-1291779 | WT_5hasex | WT_veg | OK     | 14,0385   | 7,98024   | -0,814882     | 1,23608       | 0,216429   | 0,476454   | no  |
| AN1599 | ChrVII_A_nidulans_FGSC_A4:1296287-1298723 | WT_5hasex | WT_veg | OK     | 2,73185   | 2,64928   | -0,0442773    | 0,0606541     | 0,951635   | 0,982116   | no  |
| AN1600 | ChrVII_A_nidulans_FGSC_A4:1299896-1300853 | WT_5hasex | WT_veg | OK     | 6,39519   | 2,37083   | -1,4316       | 1,61219       | 0,10692    | 0,303563   | no  |
| AN1602 | ChrVII_A_nidulans_FGSC_A4:1318739-1319813 | WT_5hasex | WT_veg | NOTEST | 0,700581  | 0         | -1.79769e+308 | -1.79769e+308 | 0,0375932  | 1          | no  |
| AN1603 | ChrVII_A_nidulans_FGSC_A4:1321978-1322451 | WT_5hasex | WT_veg | OK     | 5,03471   | 14,4446   | 1,52055       | -1,54892      | 0,121401   | 0,330253   | no  |
| AN1605 | ChrVII_A_nidulans_FGSC_A4:1326428-1327778 | WT_5hasex | WT_veg | OK     | 233,137   | 259,474   | 0,154412      | -0,294481     | 0,768391   | 0,904979   | no  |
| AN1606 | ChrVII_A_nidulans_FGSC_A4:1327896-1329402 | WT_5hasex | WT_veg | OK     | 66,0024   | 147,997   | 1,16498       | -2,36661      | 0,0179517  | 0,0820035  | no  |
| AN1607 | ChrVII_A_nidulans_FGSC_A4:1330933-1334130 | WT_5hasex | WT_veg | OK     | 51,4035   | 172,496   | 1,74662       | -3,49128      | 0,00048071 | 0,00420749 | yes |
| AN1608 | ChrVII_A_nidulans_FGSC_A4:1339830-1340583 | WT_5hasex | WT_veg | OK     | 2259,5    | 1564,93   | -0,529903     | 0,748951      | 0,453886   | 0,715304   | no  |
| AN1609 | ChrVII_A_nidulans_FGSC_A4:1340665-1343538 | WT_5hasex | WT_veg | OK     | 6,39924   | 2,97871   | -1,10321      | 1,59439       | 0,11085    | 0,310877   | no  |
| AN1610 | ChrVII_A_nidulans_FGSC_A4:1346095-1347242 | WT_5hasex | WT_veg | OK     | 22,9476   | 79,2664   | 1,78837       | -3,27559      | 0,00105441 | 0,00820268 | yes |
| AN1611 | ChrVII_A_nidulans_FGSC_A4:1347343-1349233 | WT_5hasex | WT_veg | OK     | 13,0649   | 16,805    | 0,363197      | -0,633512     | 0,526399   | 0,767364   | no  |
| AN1612 | ChrVII_A_nidulans_FGSC_A4:1350625-1352730 | WT_5hasex | WT_veg | OK     | 59,3666   | 43,9724   | -0,433055     | 0,787326      | 0,431091   | 0,697632   | no  |
| AN1613 | ChrVII_A_nidulans_FGSC_A4:1353917-1355191 | WT_5hasex | WT_veg | OK     | 15,8772   | 8,06257   | -0,977643     | 1,46957       | 0,14168    | 0,365189   | no  |
| AN1614 | ChrVII_A_nidulans_FGSC_A4:1355891-1357461 | WT_5hasex | WT_veg | OK     | 80,7017   | 67,8401   | -0,25046      | 0,431304      | 0,666248   | 0,850877   | no  |
| AN1615 | ChrVII_A_nidulans_FGSC_A4:1360577-1363569 | WT_5hasex | WT_veg | NOTEST | 0,204619  | 0,169268  | -0,273629     | 0,146891      | 0,883218   | 1          | no  |
| AN1616 | ChrVII_A_nidulans_FGSC_A4:1366469-1368051 | WT_5hasex | WT_veg | OK     | 2,67748   | 1,23436   | -1,11712      | 1,05651       | 0,290737   | 0,565481   | no  |
| AN1617 | ChrVII_A_nidulans_FGSC_A4:1368757-1369421 | WT_5hasex | WT_veg | OK     | 0,463495  | 4,32197   | 3,22106       | -1,90802      | 0,056389   | 0,193281   | no  |
| AN1618 | ChrVII_A_nidulans_FGSC_A4:1370845-1371376 | WT_5hasex | WT_veg | NOTEST | 0         | 0         | 0             | 0             | 1          | 1          | no  |
| AN1620 | ChrVII_A_nidulans_FGSC_A4:1376901-1378193 | WT_5hasex | WT_veg | OK     | 19,526    | 25,0402   | 0,358848      | -0,636253     | 0,524612   | 0,766163   | no  |
| AN1621 | ChrVII_A_nidulans_FGSC_A4:1379569-1380184 | WT_5hasex | WT_veg | OK     | 39,7936   | 166,021   | 2,06076       | -3,77874      | 0,00015762 | 0,0016221  | yes |
| AN1622 | ChrVII_A_nidulans_FGSC_A4:1380579-1382235 | WT_5hasex | WT_veg | OK     | 7,88529   | 13,2116   | 0,744567      | -1,16277      | 0,244922   | 0,512494   | no  |
| AN1623 | ChrVII_A_nidulans_FGSC_A4:1383358-1385137 | WT_5hasex | WT_veg | NOTEST | 0,15125   | 0         | -1.79769e+308 | -1.79769e+308 | 0,224063   | 1          | no  |
| AN1625 | ChrVII_A_nidulans_FGSC_A4:1396317-1398642 | WT_5hasex | WT_veg | OK     | 18,3481   | 125,859   | 2,77811       | -5,46525      | 4,6224E-08 | 1,1584E-06 | yes |
| AN1626 | ChrVII_A_nidulans_FGSC_A4:1399750-1402103 | WT_5hasex | WT_veg | NOTEST | 0,10109   | 0         | -1.79769e+308 | -1.79769e+308 | 0,165569   | 1          | no  |
| AN1627 | ChrVII_A_nidulans_FGSC_A4:1404640-1405403 | WT_5hasex | WT_veg | NOTEST | 0,363307  | 1,69387   | 2,22106       | -1,14626      | 0,251686   | 1          | no  |
| AN1629 | ChrVII_A_nidulans_FGSC_A4:1411275-1413553 | WT_5hasex | WT_veg | OK     | 30,4644   | 28,3951   | -0,101486     | 0,206862      | 0,836117   | 0,934861   | no  |
| AN1631 | ChrVII_A_nidulans_FGSC_A4:1420038-1421866 | WT_5hasex | WT_veg | OK     | 11,583    | 11,55     | -0,00410957   | 0,00706552    | 0,994363   | 0,997868   | no  |
| AN1632 | ChrVII_A_nidulans_FGSC_A4:1422819-1425774 | WT_5hasex | WT_veg | OK     | 39,3778   | 57,4033   | 0,543751      | -1,08428      | 0,278241   | 0,551535   | no  |
| AN1633 | ChrVII_A_nidulans_FGSC_A4:1427817-1428512 | WT_5hasex | WT_veg | OK     | 74,4407   | 176,89    | 1,24869       | -2,41032      | 0,0159386  | 0,0749877  | no  |
| AN1634 | ChrVII_A_nidulans_FGSC_A4:1429094-1431731 | WT_5hasex | WT_veg | OK     | 21,1024   | 32,5952   | 0,627256      | -1,2633       | 0,206481   | 0,463323   | no  |
| AN1635 | ChrVII_A_nidulans_FGSC_A4:1432276-1434729 | WT_5hasex | WT_veg | OK     | 11,5787   | 26,6472   | 1,20251       | -2,16209      | 0,0306114  | 0,123227   | no  |
| AN1636 | ChrVII_A_nidulans_FGSC_A4:1435020-1435709 | WT_5hasex | WT_veg | OK     | 72,2845   | 162,075   | 1,1649        | -2,28549      | 0,0222843  | 0,0966275  | no  |
| AN1638 | ChrVII_A_nidulans_FGSC_A4:1439211-1442057 | WT_5hasex | WT_veg | OK     | 96,4944   | 77,8311   | -0,310097     | 0,628584      | 0,529621   | 0,769192   | no  |
| AN1639 | ChrVII_A_nidulans_FGSC_A4:1442962-1444127 | WT_5hasex | WT_veg | OK     | 86,5011   | 164,663   | 0,928725      | -1,92489      | 0,0542437  | 0,187957   | no  |
| AN1640 | ChrVII_A_nidulans_FGSC_A4:1445840-1448327 | WT_5hasex | WT_veg | OK     | 4,26011   | 20,5987   | 2,27359       | -3,32995      | 0,00086863 | 0,00697697 | yes |
| AN1641 | ChrVII_A_nidulans_FGSC_A4:1449454-1451690 | WT_5hasex | WT_veg | NOTEST | 0,401146  | 0         | -1.79769e+308 | -1.79769e+308 | 0,0540986  | 1          | no  |

# Supplementary table 1

|        |                                           |           |        |        |          |          |               |               |            |            |     |
|--------|-------------------------------------------|-----------|--------|--------|----------|----------|---------------|---------------|------------|------------|-----|
| AN1642 | ChrVII_A_nidulans_FGSC_A4:1453629-1455435 | WT_5hasex | WT_veg | NOTEST | 0,111674 | 0        | -1.79769e+308 | -1.79769e+308 | 0,165569   | 1          | no  |
| AN1643 | ChrVII_A_nidulans_FGSC_A4:1455949-1457661 | WT_5hasex | WT_veg | NOTEST | 0,705279 | 0,541377 | -0,381561     | 0,256794      | 0,797338   | 1          | no  |
| AN1644 | ChrVII_A_nidulans_FGSC_A4:1459370-1460524 | WT_5hasex | WT_veg | NOTEST | 1,62763  | 2,84884  | 0,807601      | -0,809701     | 0,418112   | 1          | no  |
| AN1645 | ChrVII_A_nidulans_FGSC_A4:1461624-1462838 | WT_5hasex | WT_veg | NOTEST | 0,619728 | 0,85723  | 0,468047      | -0,301358     | 0,763142   | 1          | no  |
| AN1646 | ChrVII_A_nidulans_FGSC_A4:1467425-1471573 | WT_5hasex | WT_veg | OK     | 123,658  | 45,6939  | -1,43628      | 2,82515       | 0,00472587 | 0,0284388  | yes |
| AN1647 | ChrVII_A_nidulans_FGSC_A4:1472952-1474294 | WT_5hasex | WT_veg | OK     | 51,346   | 16,6154  | -1,62773      | 3,1165        | 0,00183015 | 0,0129582  | yes |
| AN1648 | ChrVII_A_nidulans_FGSC_A4:1475573-1477303 | WT_5hasex | WT_veg | NOTEST | 0        | 0,147912 | 1.79769e+308  | 1.79769e+308  | 0,309884   | 1          | no  |
| AN1649 | ChrVII_A_nidulans_FGSC_A4:1478184-1479491 | WT_5hasex | WT_veg | OK     | 2,12977  | 7,29368  | 1,77595       | -2,05807      | 0,0395838  | 0,149674   | no  |
| AN1650 | ChrVII_A_nidulans_FGSC_A4:1480211-1481223 | WT_5hasex | WT_veg | OK     | 1,39766  | 5,19969  | 1,89541       | -1,87884      | 0,0602662  | 0,202922   | no  |
| AN1651 | ChrVII_A_nidulans_FGSC_A4:1484278-1485145 | WT_5hasex | WT_veg | OK     | 10,6302  | 16,3028  | 0,616946      | -0,874748     | 0,381711   | 0,655838   | no  |
| AN1654 | ChrVII_A_nidulans_FGSC_A4:1508033-1508943 | WT_5hasex | WT_veg | OK     | 52,844   | 74,2566  | 0,490781      | -0,969038     | 0,332526   | 0,608884   | no  |
| AN1656 | ChrVII_A_nidulans_FGSC_A4:1520362-1521652 | WT_5hasex | WT_veg | OK     | 28,9957  | 71,4084  | 1,30026       | -2,28341      | 0,0224059  | 0,0970264  | no  |
| AN1658 | ChrVII_A_nidulans_FGSC_A4:1526500-1527217 | WT_5hasex | WT_veg | OK     | 8,09521  | 8,78416  | 0,117836      | -0,154529     | 0,877192   | 0,953091   | no  |
| AN1659 | ChrVII_A_nidulans_FGSC_A4:1528397-1530388 | WT_5hasex | WT_veg | OK     | 191,674  | 291,094  | 0,602832      | -0,93682      | 0,348851   | 0,624632   | no  |
| AN1660 | ChrVII_A_nidulans_FGSC_A4:1531708-1537477 | WT_5hasex | WT_veg | OK     | 6,34226  | 10,9613  | 0,789352      | -1,53428      | 0,12496    | 0,33632    | no  |
| AN1661 | ChrVII_A_nidulans_FGSC_A4:1538063-1539753 | WT_5hasex | WT_veg | OK     | 25,9513  | 39,7385  | 0,614728      | -1,19247      | 0,233078   | 0,497891   | no  |
| AN1662 | ChrVII_A_nidulans_FGSC_A4:1541113-1541869 | WT_5hasex | WT_veg | OK     | 107,795  | 638,328  | 2,56601       | -5,29291      | 1,2038E-07 | 2,7475E-06 | yes |
| AN1663 | ChrVII_A_nidulans_FGSC_A4:1543130-1545302 | WT_5hasex | WT_veg | OK     | 4,77395  | 7,99829  | 0,744507      | -1,13707      | 0,255507   | 0,524836   | no  |
| AN1664 | ChrVII_A_nidulans_FGSC_A4:1547611-1548619 | WT_5hasex | WT_veg | OK     | 64,7035  | 123,557  | 0,933258      | -1,88748      | 0,0590958  | 0,200087   | no  |
| AN1665 | ChrVII_A_nidulans_FGSC_A4:1551347-1553475 | WT_5hasex | WT_veg | OK     | 26,4997  | 44,9907  | 0,763651      | -1,5156       | 0,129621   | 0,344599   | no  |
| AN1666 | ChrVII_A_nidulans_FGSC_A4:1553756-1556325 | WT_5hasex | WT_veg | OK     | 34,5578  | 306,509  | 3,14885       | -6,26695      | 3,6819E-10 | 1,3991E-08 | yes |
| AN1667 | ChrVII_A_nidulans_FGSC_A4:1556578-1557527 | WT_5hasex | WT_veg | OK     | 88,5929  | 310,056  | 1,80727       | -3,685        | 0,0002287  | 0,00223673 | yes |
| AN1668 | ChrVII_A_nidulans_FGSC_A4:1557650-1558884 | WT_5hasex | WT_veg | OK     | 20,9326  | 44,5787  | 1,09061       | -2,00062      | 0,0454332  | 0,165717   | no  |
| AN1669 | ChrVII_A_nidulans_FGSC_A4:1559119-1560987 | WT_5hasex | WT_veg | OK     | 11,3252  | 55,2464  | 2,28634       | -4,13908      | 3,4871E-05 | 0,00043736 | yes |
| AN1670 | ChrVII_A_nidulans_FGSC_A4:1563104-1565350 | WT_5hasex | WT_veg | OK     | 53,082   | 23,2436  | -1,19139      | 2,05584       | 0,0397982  | 0,150296   | no  |
| AN1671 | ChrVII_A_nidulans_FGSC_A4:1565875-1567759 | WT_5hasex | WT_veg | OK     | 42,1594  | 90,1511  | 1,09649       | -2,27467      | 0,0229258  | 0,0987554  | no  |
| AN1672 | ChrVII_A_nidulans_FGSC_A4:1567827-1568768 | WT_5hasex | WT_veg | NOTEST | 0,321225 | 0        | -1.79769e+308 | -1.79769e+308 | 0,165569   | 1          | no  |
| AN1673 | ChrVII_A_nidulans_FGSC_A4:1570007-1571751 | WT_5hasex | WT_veg | OK     | 28,7271  | 35,4069  | 0,301619      | -0,587955     | 0,556562   | 0,786436   | no  |
| AN1674 | ChrVII_A_nidulans_FGSC_A4:1572224-1576481 | WT_5hasex | WT_veg | OK     | 10,5946  | 15,2212  | 0,522748      | -1,053        | 0,292342   | 0,567087   | no  |
| AN1675 | ChrVII_A_nidulans_FGSC_A4:1576930-1579085 | WT_5hasex | WT_veg | OK     | 144,326  | 180,209  | 0,320339      | -0,592571     | 0,553468   | 0,784136   | no  |
| AN1676 | ChrVII_A_nidulans_FGSC_A4:1580096-1580997 | WT_5hasex | WT_veg | OK     | 10,2186  | 30,4046  | 1,5731        | -2,46657      | 0,0136414  | 0,066416   | no  |
| AN1677 | ChrVII_A_nidulans_FGSC_A4:1585069-1586506 | WT_5hasex | WT_veg | OK     | 165,321  | 857,87   | 2,37549       | -4,62789      | 3,6942E-06 | 5,8947E-05 | yes |
| AN1678 | ChrVII_A_nidulans_FGSC_A4:1589267-1591542 | WT_5hasex | WT_veg | OK     | 2,52594  | 3,37804  | 0,419364      | -0,585727     | 0,558059   | 0,787489   | no  |
| AN1679 | ChrVII_A_nidulans_FGSC_A4:1591939-1592958 | WT_5hasex | WT_veg | OK     | 3,12295  | 4,46671  | 0,516305      | -0,603546     | 0,546146   | 0,779643   | no  |
| AN1680 | ChrVII_A_nidulans_FGSC_A4:1593566-1597363 | WT_5hasex | WT_veg | OK     | 3,13009  | 4,49235  | 0,521267      | -0,844754     | 0,398248   | 0,670819   | no  |
| AN1681 | ChrVII_A_nidulans_FGSC_A4:1598097-1599920 | WT_5hasex | WT_veg | NOTEST | 1,54903  | 1,42869  | -0,116669     | 0,119128      | 0,905174   | 1          | no  |
| AN1682 | ChrVII_A_nidulans_FGSC_A4:1600070-1600901 | WT_5hasex | WT_veg | OK     | 76,793   | 321,369  | 2,06518       | -4,22957      | 2,3414E-05 | 0,00030658 | yes |
| AN1683 | ChrVII_A_nidulans_FGSC_A4:1601092-1602263 | WT_5hasex | WT_veg | OK     | 50,7683  | 71,9753  | 0,503572      | -0,992576     | 0,320917   | 0,597331   | no  |
| AN1684 | ChrVII_A_nidulans_FGSC_A4:1603804-1606051 | WT_5hasex | WT_veg | OK     | 4,06547  | 10,5727  | 1,37885       | -2,20451      | 0,0274888  | 0,113369   | no  |
| AN1685 | ChrVII_A_nidulans_FGSC_A4:1609405-1610851 | WT_5hasex | WT_veg | OK     | 21,6869  | 29,4991  | 0,443849      | -0,841244     | 0,400211   | 0,672425   | no  |
| AN1686 | ChrVII_A_nidulans_FGSC_A4:1611753-1613148 | WT_5hasex | WT_veg | OK     | 17,7355  | 20,8526  | 0,233586      | -0,417685     | 0,676178   | 0,856016   | no  |
| AN1687 | ChrVII_A_nidulans_FGSC_A4:1616321-1617460 | WT_5hasex | WT_veg | NOTEST | 0        | 0        | 0             | 0             | 1          | 1          | no  |
| AN1688 | ChrVII_A_nidulans_FGSC_A4:1618390-1619928 | WT_5hasex | WT_veg | OK     | 18,862   | 24,0223  | 0,348888      | -0,640972     | 0,521541   | 0,764469   | no  |
| AN1689 | ChrVII_A_nidulans_FGSC_A4:1624023-1625632 | WT_5hasex | WT_veg | OK     | 125,004  | 159,425  | 0,350904      | -0,599286     | 0,548982   | 0,781464   | no  |
| AN1690 | ChrVII_A_nidulans_FGSC_A4:1626220-1627587 | WT_5hasex | WT_veg | OK     | 45,0666  | 65,6313  | 0,542325      | -1,06109      | 0,288648   | 0,563278   | no  |
| AN1691 | ChrVII_A_nidulans_FGSC_A4:1628541-1630606 | WT_5hasex | WT_veg | OK     | 7,35956  | 9,61031  | 0,384964      | -0,61447      | 0,538905   | 0,774794   | no  |
| AN1693 | ChrVII_A_nidulans_FGSC_A4:1637136-1638680 | WT_5hasex | WT_veg | OK     | 13,9408  | 33,1363  | 1,2491        | -2,19969      | 0,0278286  | 0,114419   | no  |
| AN1694 | ChrVII_A_nidulans_FGSC_A4:1640188-1641521 | WT_5hasex | WT_veg | OK     | 30,1226  | 30,9741  | 0,040214      | -0,0792481    | 0,936835   | 0,976373   | no  |
| AN1695 | ChrVII_A_nidulans_FGSC_A4:1642224-1644223 | WT_5hasex | WT_veg | OK     | 21,5176  | 22,7396  | 0,0796868     | -0,155256     | 0,87662    | 0,952877   | no  |
| AN1696 | ChrVII_A_nidulans_FGSC_A4:1644833-1646477 | WT_5hasex | WT_veg | OK     | 23,004   | 24,2896  | 0,0784545     | -0,150906     | 0,88005    | 0,954454   | no  |
| AN1697 | ChrVII_A_nidulans_FGSC_A4:1647770-1650193 | WT_5hasex | WT_veg | OK     | 12,0584  | 28,2036  | 1,22584       | -2,33089      | 0,0197592  | 0,0883011  | no  |
| AN1698 | ChrVII_A_nidulans_FGSC_A4:1650724-1654031 | WT_5hasex | WT_veg | OK     | 20,4795  | 35,6527  | 0,799834      | -1,6279       | 0,103546   | 0,296908   | no  |
| AN1699 | ChrVII_A_nidulans_FGSC_A4:1654614-1656616 | WT_5hasex | WT_veg | OK     | 47,3186  | 94,2655  | 0,994321      | -2,06931      | 0,0385166  | 0,146693   | no  |

## Supplementary table 1

|        |                                           |           |        |        |          |          |            |            |            |            |     |
|--------|-------------------------------------------|-----------|--------|--------|----------|----------|------------|------------|------------|------------|-----|
| AN1700 | ChrVII_A_nidulans_FGSC_A4:1657628-1661295 | WT_5hasex | WT_veg | OK     | 70,6726  | 131,097  | 0,891412   | -1,81507   | 0,0695135  | 0,224404   | no  |
| AN1701 | ChrVII_A_nidulans_FGSC_A4:1661764-1663129 | WT_5hasex | WT_veg | OK     | 19,2196  | 17,6498  | -0,122927  | 0,228646   | 0,819144   | 0,927522   | no  |
| AN1702 | ChrVII_A_nidulans_FGSC_A4:1663394-1665255 | WT_5hasex | WT_veg | OK     | 7,01586  | 6,64272  | -0,0788463 | 0,115501   | 0,908048   | 0,964792   | no  |
| AN1704 | ChrVII_A_nidulans_FGSC_A4:1667393-1669168 | WT_5hasex | WT_veg | OK     | 10,9402  | 8,43311  | -0,375502  | 0,646504   | 0,517953   | 0,761981   | no  |
| AN1705 | ChrVII_A_nidulans_FGSC_A4:1669227-1671753 | WT_5hasex | WT_veg | OK     | 7,58304  | 20,2537  | 1,41733    | -2,41228   | 0,0158532  | 0,0746665  | no  |
| AN1706 | ChrVII_A_nidulans_FGSC_A4:1673854-1675138 | WT_5hasex | WT_veg | OK     | 15,6698  | 22,5859  | 0,527438   | -0,906885  | 0,364468   | 0,639392   | no  |
| AN1707 | ChrVII_A_nidulans_FGSC_A4:1676698-1677560 | WT_5hasex | WT_veg | OK     | 1,60709  | 6,44347  | 2,00339    | -2,18001   | 0,0292569  | 0,118976   | no  |
| AN1709 | ChrVII_A_nidulans_FGSC_A4:1682441-1684209 | WT_5hasex | WT_veg | OK     | 40,415   | 129,99   | 1,68544    | -3,38961   | 0,00069991 | 0,00579503 | yes |
| AN1710 | ChrVII_A_nidulans_FGSC_A4:1685462-1687643 | WT_5hasex | WT_veg | OK     | 29,4517  | 30,2808  | 0,0400518  | -0,080204  | 0,936075   | 0,976027   | no  |
| AN1711 | ChrVII_A_nidulans_FGSC_A4:1688017-1689649 | WT_5hasex | WT_veg | OK     | 59,5851  | 221,003  | 1,89104    | -3,86898   | 0,00010929 | 0,00118645 | yes |
| AN1712 | ChrVII_A_nidulans_FGSC_A4:1689905-1691021 | WT_5hasex | WT_veg | OK     | 5,30843  | 10,7947  | 1,02396    | -1,42278   | 0,1548     | 0,386905   | no  |
| AN1713 | ChrVII_A_nidulans_FGSC_A4:1691775-1694483 | WT_5hasex | WT_veg | OK     | 13,6353  | 28,5713  | 1,06722    | -2,03138   | 0,0422163  | 0,156906   | no  |
| AN1714 | ChrVII_A_nidulans_FGSC_A4:1695241-1696003 | WT_5hasex | WT_veg | OK     | 30,9785  | 84,7107  | 1,45128    | -2,63566   | 0,00839733 | 0,0452946  | yes |
| AN1715 | ChrVII_A_nidulans_FGSC_A4:1696198-1697881 | WT_5hasex | WT_veg | OK     | 36,8569  | 80,1433  | 1,12065    | -2,21637   | 0,0266664  | 0,110785   | no  |
| AN1716 | ChrVII_A_nidulans_FGSC_A4:1698415-1699531 | WT_5hasex | WT_veg | OK     | 23,4535  | 48,968   | 1,06203    | -1,93371   | 0,053149   | 0,185272   | no  |
| AN1717 | ChrVII_A_nidulans_FGSC_A4:1701261-1702466 | WT_5hasex | WT_veg | OK     | 8,74758  | 4,8808   | -0,841768  | 1,15626    | 0,247573   | 0,515817   | no  |
| AN1718 | ChrVII_A_nidulans_FGSC_A4:1707417-1708146 | WT_5hasex | WT_veg | OK     | 45,8571  | 68,7036  | 0,583243   | -1,10583   | 0,268799   | 0,540623   | no  |
| AN1719 | ChrVII_A_nidulans_FGSC_A4:1709342-1710585 | WT_5hasex | WT_veg | OK     | 61,124   | 73,9286  | 0,274395   | -0,559604  | 0,57575    | 0,798629   | no  |
| AN1720 | ChrVII_A_nidulans_FGSC_A4:1711346-1712202 | WT_5hasex | WT_veg | OK     | 28,235   | 45,6678  | 0,69369    | -1,25033   | 0,21118    | 0,469732   | no  |
| AN1721 | ChrVII_A_nidulans_FGSC_A4:1712314-1713375 | WT_5hasex | WT_veg | OK     | 47,7119  | 61,3969  | 0,363818   | -0,723843  | 0,469162   | 0,727433   | no  |
| AN1722 | ChrVII_A_nidulans_FGSC_A4:1713573-1715094 | WT_5hasex | WT_veg | OK     | 41,2533  | 52,885   | 0,358348   | -0,705234  | 0,480665   | 0,735496   | no  |
| AN1723 | ChrVII_A_nidulans_FGSC_A4:1715615-1716066 | WT_5hasex | WT_veg | OK     | 1148,51  | 812,672  | -0,499025  | 0,694504   | 0,487366   | 0,740904   | no  |
| AN1724 | ChrVII_A_nidulans_FGSC_A4:1716985-1718939 | WT_5hasex | WT_veg | OK     | 9,96581  | 11,1772  | 0,165505   | -0,258932  | 0,795687   | 0,917098   | no  |
| AN1725 | ChrVII_A_nidulans_FGSC_A4:1720001-1721507 | WT_5hasex | WT_veg | OK     | 12,61    | 9,0221   | -0,483037  | 0,759464   | 0,447575   | 0,710602   | no  |
| AN1726 | ChrVII_A_nidulans_FGSC_A4:1721853-1723636 | WT_5hasex | WT_veg | OK     | 28,6082  | 59,4328  | 1,05483    | -1,90093   | 0,0573113  | 0,195497   | no  |
| AN1734 | ChrVII_A_nidulans_FGSC_A4:1745931-1747038 | WT_5hasex | WT_veg | OK     | 13,945   | 25,5875  | 0,875689   | -1,3405    | 0,180082   | 0,42638    | no  |
| AN1736 | ChrVII_A_nidulans_FGSC_A4:1752175-1754179 | WT_5hasex | WT_veg | OK     | 4,36424  | 14,974   | 1,77865    | -2,78375   | 0,00537352 | 0,0314864  | yes |
| AN1738 | ChrVII_A_nidulans_FGSC_A4:1757754-1758897 | WT_5hasex | WT_veg | OK     | 2,38213  | 0,192863 | -3,62661   | 1,20344    | 0,228806   | 0,491894   | no  |
| AN1739 | ChrVII_A_nidulans_FGSC_A4:1761642-1762498 | WT_5hasex | WT_veg | NOTEST | 0        | 0        | 0          | 0          | 1          | 1          | no  |
| AN1740 | ChrVII_A_nidulans_FGSC_A4:1762645-1764700 | WT_5hasex | WT_veg | NOTEST | 0,455354 | 1,52561  | 1,74433    | -1,19737   | 0,231162   | 1          | no  |
| AN1741 | ChrVII_A_nidulans_FGSC_A4:1764971-1766085 | WT_5hasex | WT_veg | NOTEST | 0        | 0        | 0          | 0          | 1          | 1          | no  |
| AN1743 | ChrVII_A_nidulans_FGSC_A4:1770956-1772048 | WT_5hasex | WT_veg | OK     | 142,441  | 147,298  | 0,0483694  | -0,0954118 | 0,923988   | 0,971362   | no  |
| AN1744 | ChrVII_A_nidulans_FGSC_A4:1772472-1773976 | WT_5hasex | WT_veg | OK     | 7,64447  | 22,3256  | 1,54621    | -2,47472   | 0,0133341  | 0,0653633  | no  |
| AN1745 | ChrVII_A_nidulans_FGSC_A4:1774497-1776118 | WT_5hasex | WT_veg | OK     | 39,3856  | 110,39   | 1,48687    | -3,06094   | 0,00220643 | 0,0151674  | yes |
| AN1747 | ChrVII_A_nidulans_FGSC_A4:1784748-1785622 | WT_5hasex | WT_veg | OK     | 32,3355  | 210,555  | 2,703      | -4,68581   | 2,7885E-06 | 4,6038E-05 | yes |
| AN1749 | ChrVII_A_nidulans_FGSC_A4:1788319-1792210 | WT_5hasex | WT_veg | OK     | 9,85302  | 14,1519  | 0,522354   | -0,896925  | 0,369759   | 0,64439    | no  |
| AN1750 | ChrVII_A_nidulans_FGSC_A4:1793014-1795427 | WT_5hasex | WT_veg | OK     | 9,07116  | 38,4988  | 2,08545    | -3,71983   | 0,00019936 | 0,00198692 | yes |
| AN1751 | ChrVII_A_nidulans_FGSC_A4:1795658-1796996 | WT_5hasex | WT_veg | OK     | 15,9518  | 29,5838  | 0,89109    | -1,59385   | 0,110969   | 0,311085   | no  |
| AN1752 | ChrVII_A_nidulans_FGSC_A4:1797337-1800475 | WT_5hasex | WT_veg | OK     | 34,5672  | 36,9206  | 0,0950198  | -0,198697  | 0,8425     | 0,937733   | no  |
| AN1753 | ChrVII_A_nidulans_FGSC_A4:1800898-1802584 | WT_5hasex | WT_veg | OK     | 119,421  | 326,116  | 1,44932    | -2,82211   | 0,0047709  | 0,0286702  | yes |
| AN1754 | ChrVII_A_nidulans_FGSC_A4:1800898-1802584 | WT_5hasex | WT_veg | OK     | 257,759  | 1872,18  | 2,86063    | -5,2574    | 1,4611E-07 | 3,2803E-06 | yes |
| AN1755 | ChrVII_A_nidulans_FGSC_A4:1803407-1804107 | WT_5hasex | WT_veg | OK     | 11,7749  | 24,852   | 1,07765    | -1,35036   | 0,176902   | 0,421766   | no  |
| AN1756 | ChrVII_A_nidulans_FGSC_A4:1806184-1806520 | WT_5hasex | WT_veg | OK     | 75,6041  | 353,371  | 2,22465    | -3,49192   | 0,00047957 | 0,00420239 | yes |
| AN1758 | ChrVII_A_nidulans_FGSC_A4:1809162-1810909 | WT_5hasex | WT_veg | OK     | 13,6689  | 11,3878  | -0,263409  | 0,474509   | 0,635137   | 0,833203   | no  |
| AN1759 | ChrVII_A_nidulans_FGSC_A4:1811360-1812303 | WT_5hasex | WT_veg | OK     | 24,8847  | 79,9071  | 1,68306    | -3,11746   | 0,00182415 | 0,0129174  | yes |
| AN1760 | ChrVII_A_nidulans_FGSC_A4:1813021-1813746 | WT_5hasex | WT_veg | OK     | 37,3436  | 87,983   | 1,23637    | -2,13595   | 0,0326835  | 0,129631   | no  |
| AN1761 | ChrVII_A_nidulans_FGSC_A4:1814695-1816428 | WT_5hasex | WT_veg | OK     | 615,288  | 1748,07  | 1,50643    | -2,71864   | 0,00655518 | 0,0371839  | yes |
| AN1762 | ChrVII_A_nidulans_FGSC_A4:1816825-1817608 | WT_5hasex | WT_veg | OK     | 85,3572  | 118,626  | 0,474838   | -0,955003  | 0,339576   | 0,615534   | no  |
| AN1763 | ChrVII_A_nidulans_FGSC_A4:1819011-1820063 | WT_5hasex | WT_veg | OK     | 122,995  | 238,623  | 0,956131   | -1,87982   | 0,0601331  | 0,202619   | no  |
| AN1764 | ChrVII_A_nidulans_FGSC_A4:1821289-1822355 | WT_5hasex | WT_veg | OK     | 8,29563  | 36,7844  | 2,14867    | -3,24248   | 0,00118494 | 0,00903398 | yes |
| AN1765 | ChrVII_A_nidulans_FGSC_A4:1822772-1823595 | WT_5hasex | WT_veg | OK     | 25,1855  | 56,9291  | 1,17657    | -1,94313   | 0,0520002  | 0,182403   | no  |
| AN1766 | ChrVII_A_nidulans_FGSC_A4:1825100-1826782 | WT_5hasex | WT_veg | OK     | 15,673   | 17,0825  | 0,124234   | -0,220124  | 0,825774   | 0,930566   | no  |
| AN1767 | ChrVII_A_nidulans_FGSC_A4:1828079-1829906 | WT_5hasex | WT_veg | OK     | 139,743  | 83,5383  | -0,742264  | 1,48002    | 0,138868   | 0,360566   | no  |

# Supplementary table 1

|        |                                           |           |        |        |           |           |               |               |            |            |     |
|--------|-------------------------------------------|-----------|--------|--------|-----------|-----------|---------------|---------------|------------|------------|-----|
| AN1769 | ChrVII_A_nidulans_FGSC_A4:1833750-1836063 | WT_5hasex | WT_veg | OK     | 157,972   | 344,595   | 1,12523       | -2,29782      | 0,0215722  | 0,0943593  | no  |
| AN1770 | ChrVII_A_nidulans_FGSC_A4:1833750-1836063 | WT_5hasex | WT_veg | OK     | 86,8252   | 175,438   | 1,01477       | -2,09039      | 0,0365827  | 0,141185   | no  |
| AN1771 | ChrVII_A_nidulans_FGSC_A4:1836277-1839340 | WT_5hasex | WT_veg | NOTEST | 1,07878   | 1,4503    | 0,426956      | -0,385176     | 0,700107   | 1          | no  |
| AN1772 | ChrVII_A_nidulans_FGSC_A4:1839563-1841201 | WT_5hasex | WT_veg | OK     | 5,68746   | 8,30676   | 0,5465        | -0,842483     | 0,399517   | 0,67185    | no  |
| AN1773 | ChrVII_A_nidulans_FGSC_A4:1841626-1842854 | WT_5hasex | WT_veg | OK     | 18,6895   | 26,3584   | 0,496032      | -0,902839     | 0,366611   | 0,641426   | no  |
| AN1774 | ChrVII_A_nidulans_FGSC_A4:1843055-1843586 | WT_5hasex | WT_veg | OK     | 2,07285   | 1,2571    | -0,721519     | 0,465193      | 0,641793   | 0,837078   | no  |
| AN1775 | ChrVII_A_nidulans_FGSC_A4:1846096-1847961 | WT_5hasex | WT_veg | OK     | 25,156    | 15,6917   | -0,680902     | 1,33683       | 0,181279   | 0,42811    | no  |
| AN1776 | ChrVII_A_nidulans_FGSC_A4:1849682-1850655 | WT_5hasex | WT_veg | OK     | 68,599    | 163,416   | 1,25229       | -2,55185      | 0,0107154  | 0,0550026  | no  |
| AN1777 | ChrVII_A_nidulans_FGSC_A4:1851264-1854102 | WT_5hasex | WT_veg | OK     | 12,777    | 18,9844   | 0,571269      | -1,10444      | 0,269404   | 0,541263   | no  |
| AN1780 | ChrVII_A_nidulans_FGSC_A4:1860103-1862122 | WT_5hasex | WT_veg | OK     | 35,5288   | 47,9796   | 0,433431      | -0,873928     | 0,382157   | 0,656218   | no  |
| AN1781 | ChrVII_A_nidulans_FGSC_A4:1862641-1863493 | WT_5hasex | WT_veg | OK     | 68,5862   | 108,843   | 0,666254      | -1,23078      | 0,218405   | 0,479085   | no  |
| AN1782 | ChrVII_A_nidulans_FGSC_A4:1864061-1865083 | WT_5hasex | WT_veg | OK     | 9,63005   | 25,6156   | 1,4114        | -2,07593      | 0,0379004  | 0,144925   | no  |
| AN1784 | ChrVII_A_nidulans_FGSC_A4:1869035-1876894 | WT_5hasex | WT_veg | NOTEST | 0,0890433 | 0,0488626 | -0,865778     | 0,505019      | 0,613546   | 1          | no  |
| AN1785 | ChrVII_A_nidulans_FGSC_A4:1877686-1878802 | WT_5hasex | WT_veg | NOTEST | 0,409077  | 0         | -1.79769e+308 | -1.79769e+308 | 0,122325   | 1          | no  |
| AN1786 | ChrVII_A_nidulans_FGSC_A4:1878928-1880524 | WT_5hasex | WT_veg | NOTEST | 0,883401  | 0         | -1.79769e+308 | -1.79769e+308 | 0,0308491  | 1          | no  |
| AN1787 | ChrVII_A_nidulans_FGSC_A4:1880795-1882413 | WT_5hasex | WT_veg | NOTEST | 0,870154  | 0         | -1.79769e+308 | -1.79769e+308 | 0,037342   | 1          | no  |
| AN1788 | ChrVII_A_nidulans_FGSC_A4:1887870-1889172 | WT_5hasex | WT_veg | OK     | 7,01239   | 4,66261   | -0,588766     | 0,738361      | 0,460295   | 0,720367   | no  |
| AN1789 | ChrVII_A_nidulans_FGSC_A4:1889611-1891276 | WT_5hasex | WT_veg | NOTEST | 2,03334   | 0,505403  | -2,00835      | 1,41981       | 0,155663   | 1          | no  |
| AN1790 | ChrVII_A_nidulans_FGSC_A4:1894600-1896808 | WT_5hasex | WT_veg | NOTEST | 0,0835734 | 0         | -1.79769e+308 | -1.79769e+308 | 0,165569   | 1          | no  |
| AN1791 | ChrVII_A_nidulans_FGSC_A4:1898837-1902156 | WT_5hasex | WT_veg | NOTEST | 0         | 0         | 0             | 0             | 1          | 1          | no  |
| AN1792 | ChrVII_A_nidulans_FGSC_A4:1903842-1905216 | WT_5hasex | WT_veg | OK     | 15,954    | 32,9134   | 1,04475       | -1,66873      | 0,0951719  | 0,279598   | no  |
| AN1793 | ChrVII_A_nidulans_FGSC_A4:1905563-1906594 | WT_5hasex | WT_veg | OK     | 20,3991   | 19,6151   | -0,0565469    | 0,0968318     | 0,92286    | 0,970809   | no  |
| AN1795 | ChrVII_A_nidulans_FGSC_A4:1910728-1912771 | WT_5hasex | WT_veg | OK     | 91,9809   | 457,059   | 2,31298       | -4,52153      | 6,1394E-06 | 9,3036E-05 | yes |
| AN1796 | ChrVII_A_nidulans_FGSC_A4:1913292-1915956 | WT_5hasex | WT_veg | OK     | 9,80103   | 20,6104   | 1,07237       | -1,91135      | 0,0559591  | 0,192211   | no  |
| AN1797 | ChrVII_A_nidulans_FGSC_A4:1916878-1918939 | WT_5hasex | WT_veg | OK     | 20,5942   | 76,2901   | 1,88926       | -3,66959      | 0,00024294 | 0,00235486 | yes |
| AN1798 | ChrVII_A_nidulans_FGSC_A4:1922175-1924359 | WT_5hasex | WT_veg | OK     | 57,5373   | 114,2     | 0,988996      | -2,05958      | 0,0394389  | 0,149348   | no  |
| AN1799 | ChrVII_A_nidulans_FGSC_A4:1926400-1927753 | WT_5hasex | WT_veg | OK     | 18,7826   | 35,5819   | 0,921743      | -1,66843      | 0,0952297  | 0,279721   | no  |
| AN1801 | ChrVII_A_nidulans_FGSC_A4:1932408-1933321 | WT_5hasex | WT_veg | OK     | 167,577   | 819,709   | 2,29029       | -4,24566      | 2,1795E-05 | 0,00028749 | yes |
| AN1802 | ChrVII_A_nidulans_FGSC_A4:1935397-1936558 | WT_5hasex | WT_veg | OK     | 173,063   | 196,784   | 0,185318      | -0,38337      | 0,701445   | 0,870193   | no  |
| AN1803 | ChrVII_A_nidulans_FGSC_A4:1939409-1939934 | WT_5hasex | WT_veg | OK     | 21,2006   | 0         | -1.79769e+308 | -1.79769e+308 | 0,00687768 | 0,0385872  | yes |
| AN1806 | ChrVII_A_nidulans_FGSC_A4:1949835-1952437 | WT_5hasex | WT_veg | OK     | 3,4719    | 7,76234   | 1,16077       | -1,68178      | 0,0926108  | 0,274475   | no  |
| AN1807 | ChrVII_A_nidulans_FGSC_A4:1952821-1953873 | WT_5hasex | WT_veg | NOTEST | 1,13831   | 1,86727   | 0,71403       | -0,662156     | 0,507872   | 1          | no  |
| AN1808 | ChrVII_A_nidulans_FGSC_A4:1954690-1956787 | WT_5hasex | WT_veg | NOTEST | 1,10473   | 1,86007   | 0,751657      | -0,82521      | 0,409252   | 1          | no  |
| AN1809 | ChrVII_A_nidulans_FGSC_A4:1956827-1958505 | WT_5hasex | WT_veg | OK     | 15,7368   | 38,3433   | 1,28483       | -2,12589      | 0,0335128  | 0,132206   | no  |
| AN1811 | ChrVII_A_nidulans_FGSC_A4:1961000-1963374 | WT_5hasex | WT_veg | OK     | 23,3582   | 48,5533   | 1,05564       | -2,05852      | 0,03954    | 0,149558   | no  |
| AN1813 | ChrVII_A_nidulans_FGSC_A4:1967259-1968003 | WT_5hasex | WT_veg | OK     | 23,6617   | 4,20543   | -2,49223      | 2,98286       | 0,00285565 | 0,0187474  | yes |
| AN1814 | ChrVII_A_nidulans_FGSC_A4:1975382-1976029 | WT_5hasex | WT_veg | OK     | 39,5208   | 32,2743   | -0,292227     | 0,439301      | 0,660443   | 0,847373   | no  |
| AN1815 | ChrVII_A_nidulans_FGSC_A4:1977515-1978751 | WT_5hasex | WT_veg | OK     | 2,00569   | 2,79007   | 0,476203      | -0,534544     | 0,592965   | 0,808752   | no  |
| AN1817 | ChrVII_A_nidulans_FGSC_A4:1984335-1985145 | WT_5hasex | WT_veg | OK     | 249,377   | 453,539   | 0,862896      | -1,5939       | 0,110957   | 0,31108    | no  |
| AN1819 | ChrVII_A_nidulans_FGSC_A4:1988317-1989247 | WT_5hasex | WT_veg | OK     | 1,38784   | 9,77747   | 2,81662       | -3,34546      | 0,00082146 | 0,0066419  | yes |
| AN1821 | ChrVII_A_nidulans_FGSC_A4:1993606-1994967 | WT_5hasex | WT_veg | OK     | 3,91112   | 8,89387   | 1,18523       | -1,68084      | 0,0927948  | 0,274847   | no  |
| AN1822 | ChrVII_A_nidulans_FGSC_A4:1995308-1996237 | WT_5hasex | WT_veg | OK     | 4,60555   | 26,0559   | 2,50016       | -3,23328      | 0,00122377 | 0,00927012 | yes |
| AN1823 | ChrVII_A_nidulans_FGSC_A4:1997774-1999297 | WT_5hasex | WT_veg | OK     | 27,9579   | 74,6184   | 1,41628       | -2,25491      | 0,0241388  | 0,102622   | no  |
| AN1824 | ChrVII_A_nidulans_FGSC_A4:1999879-2001777 | WT_5hasex | WT_veg | NOTEST | 1,32544   | 3,61245   | 1,4465        | -1,78874      | 0,0736563  | 1          | no  |
| AN1825 | ChrVII_A_nidulans_FGSC_A4:2001917-2003538 | WT_5hasex | WT_veg | OK     | 19,3119   | 6,15671   | -1,64926      | 2,61723       | 0,00886463 | 0,0473954  | yes |
| AN1826 | ChrVII_A_nidulans_FGSC_A4:2004470-2005496 | WT_5hasex | WT_veg | OK     | 43,0102   | 3,42085   | -3,65225      | 4,77649       | 1,7838E-06 | 3,0951E-05 | yes |
| AN1827 | ChrVII_A_nidulans_FGSC_A4:2005502-2008441 | WT_5hasex | WT_veg | OK     | 11,4859   | 16,0468   | 0,482418      | -0,887126     | 0,375011   | 0,649714   | no  |
| AN1828 | ChrVII_A_nidulans_FGSC_A4:2009445-2010078 | WT_5hasex | WT_veg | NOTEST | 0,630731  | 2,74132   | 2,11977       | -1,49792      | 0,134153   | 1          | no  |
| AN1829 | ChrVII_A_nidulans_FGSC_A4:2011042-2013451 | WT_5hasex | WT_veg | NOTEST | 0         | 0         | 0             | 0             | 1          | 1          | no  |
| AN1830 | ChrVII_A_nidulans_FGSC_A4:2013773-2015839 | WT_5hasex | WT_veg | NOTEST | 0,443944  | 0         | -1.79769e+308 | -1.79769e+308 | 0,0908325  | 1          | no  |
| AN1831 | ChrVII_A_nidulans_FGSC_A4:2016787-2018925 | WT_5hasex | WT_veg | NOTEST | 0,276161  | 0,536896  | 0,959131      | -0,336763     | 0,736295   | 1          | no  |
| AN1833 | ChrVII_A_nidulans_FGSC_A4:2019502-2021018 | WT_5hasex | WT_veg | NOTEST | 1,07254   | 1,57906   | 0,558045      | -0,550339     | 0,582087   | 1          | no  |
| AN1835 | ChrVII_A_nidulans_FGSC_A4:2025358-2026910 | WT_5hasex | WT_veg | NOTEST | 0,179813  | 0         | -1.79769e+308 | -1.79769e+308 | 0,224063   | 1          | no  |

## Supplementary table 1

|        |                                           |           |        |        |          |         |               |               |            |            |     |
|--------|-------------------------------------------|-----------|--------|--------|----------|---------|---------------|---------------|------------|------------|-----|
| AN1837 | ChrVII_A_nidulans_FGSC_A4:2029773-2030464 | WT_5hasex | WT_veg | OK     | 16,2417  | 0       | -1.79769e+308 | -1.79769e+308 | 0,0230544  | 0,0991545  | no  |
| AN1838 | ChrVII_A_nidulans_FGSC_A4:2031553-2031976 | WT_5hasex | WT_veg | NOTEST | 0        | 0       | 0             | 0             | 1          | 1          | no  |
| AN1839 | ChrVII_A_nidulans_FGSC_A4:2032840-2033833 | WT_5hasex | WT_veg | OK     | 2,49298  | 13,3265 | 2,41835       | -2,93651      | 0,00331929 | 0,0212924  | yes |
| AN1840 | ChrVII_A_nidulans_FGSC_A4:2036499-2037931 | WT_5hasex | WT_veg | NOTEST | 0,685805 | 3,21305 | 2,22807       | -2,24859      | 0,0245385  | 1          | no  |
| AN1841 | ChrVII_A_nidulans_FGSC_A4:2038264-2039284 | WT_5hasex | WT_veg | OK     | 97,8057  | 172,491 | 0,818529      | -1,52837      | 0,126421   | 0,338769   | no  |
| AN1842 | ChrVII_A_nidulans_FGSC_A4:2039911-2040706 | WT_5hasex | WT_veg | OK     | 27,5336  | 84,6541 | 1,62039       | -2,88827      | 0,00387362 | 0,0241621  | yes |
| AN1843 | ChrVII_A_nidulans_FGSC_A4:2041851-2042579 | WT_5hasex | WT_veg | OK     | 28,4551  | 50,1293 | 0,816968      | -1,40626      | 0,159647   | 0,394938   | no  |
| AN1846 | ChrVII_A_nidulans_FGSC_A4:2047308-2049145 | WT_5hasex | WT_veg | OK     | 60,8306  | 119,659 | 0,976063      | -2,03294      | 0,0420588  | 0,156443   | no  |
| AN1847 | ChrVII_A_nidulans_FGSC_A4:2052484-2053663 | WT_5hasex | WT_veg | OK     | 285,123  | 583,071 | 1,03209       | -2,04863      | 0,0404987  | 0,152174   | no  |
| AN1849 | ChrVII_A_nidulans_FGSC_A4:2063500-2064472 | WT_5hasex | WT_veg | OK     | 110,863  | 295,094 | 1,4124        | -2,45781      | 0,0139788  | 0,0677195  | no  |
| AN1850 | ChrVII_A_nidulans_FGSC_A4:2064765-2066401 | WT_5hasex | WT_veg | OK     | 111,442  | 165,076 | 0,566834      | -1,14511      | 0,252162   | 0,521006   | no  |
| AN1851 | ChrVII_A_nidulans_FGSC_A4:2066680-2068625 | WT_5hasex | WT_veg | OK     | 70,5802  | 85,4752 | 0,276242      | -0,571519     | 0,567648   | 0,793812   | no  |
| AN1852 | ChrVII_A_nidulans_FGSC_A4:2068946-2069852 | WT_5hasex | WT_veg | OK     | 4,01419  | 3,93408 | -0,029084     | 0,0316411     | 0,974758   | 0,991161   | no  |
| AN1853 | ChrVII_A_nidulans_FGSC_A4:2070221-2071147 | WT_5hasex | WT_veg | OK     | 3,72341  | 1,94964 | -0,933416     | 0,867055      | 0,385912   | 0,659667   | no  |
| AN1854 | ChrVII_A_nidulans_FGSC_A4:2071765-2072858 | WT_5hasex | WT_veg | OK     | 48,2159  | 129,534 | 1,42575       | -2,82176      | 0,0047761  | 0,0286917  | yes |
| AN1855 | ChrVII_A_nidulans_FGSC_A4:2076914-2078583 | WT_5hasex | WT_veg | OK     | 85,7349  | 103,246 | 0,268135      | -0,537493     | 0,590927   | 0,807452   | no  |
| AN1856 | ChrVII_A_nidulans_FGSC_A4:2079059-2081525 | WT_5hasex | WT_veg | OK     | 6,93125  | 22,9083 | 1,72468       | -3,00337      | 0,00267012 | 0,0177383  | yes |
| AN1857 | ChrVII_A_nidulans_FGSC_A4:2082845-2084668 | WT_5hasex | WT_veg | OK     | 16,0507  | 39,0261 | 1,2818        | -2,38337      | 0,0171548  | 0,079293   | no  |
| AN1858 | ChrVII_A_nidulans_FGSC_A4:2085371-2086793 | WT_5hasex | WT_veg | OK     | 1,82123  | 1,39644 | -0,383161     | 0,365257      | 0,71492    | 0,877646   | no  |
| AN1859 | ChrVII_A_nidulans_FGSC_A4:2086859-2088307 | WT_5hasex | WT_veg | OK     | 52,1311  | 199,322 | 1,93489       | -4,03872      | 5,3744E-05 | 0,0006376  | yes |
| AN1860 | ChrVII_A_nidulans_FGSC_A4:2088525-2089710 | WT_5hasex | WT_veg | OK     | 224,498  | 222,615 | -0,0121507    | 0,0237155     | 0,98108    | 0,993402   | no  |
| AN1861 | ChrVII_A_nidulans_FGSC_A4:2089739-2090735 | WT_5hasex | WT_veg | OK     | 43,8346  | 98,8376 | 1,17299       | -2,32878      | 0,0198705  | 0,0887149  | no  |
| AN1862 | ChrVII_A_nidulans_FGSC_A4:2091055-2093101 | WT_5hasex | WT_veg | OK     | 29,9102  | 53,2223 | 0,831392      | -1,61512      | 0,106284   | 0,302327   | no  |
| AN1864 | ChrVII_A_nidulans_FGSC_A4:2095059-2096650 | WT_5hasex | WT_veg | OK     | 38,3541  | 27,5898 | -0,475249     | 0,954807      | 0,339675   | 0,615537   | no  |
| AN1865 | ChrVII_A_nidulans_FGSC_A4:2098108-2099683 | WT_5hasex | WT_veg | OK     | 4,0932   | 7,16743 | 0,808227      | -1,14692      | 0,251413   | 0,520118   | no  |
| AN1866 | ChrVII_A_nidulans_FGSC_A4:2100349-2101768 | WT_5hasex | WT_veg | OK     | 10,2346  | 3,75864 | -1,44517      | 1,88475       | 0,059463   | 0,201064   | no  |
| AN1868 | ChrVII_A_nidulans_FGSC_A4:2104053-2105641 | WT_5hasex | WT_veg | OK     | 6,94509  | 16,1948 | 1,22147       | -1,80231      | 0,0714966  | 0,228896   | no  |
| AN1869 | ChrVII_A_nidulans_FGSC_A4:2105828-2106839 | WT_5hasex | WT_veg | OK     | 3,24956  | 3,64561 | 0,165915      | -0,187824     | 0,851014   | 0,941399   | no  |
| AN1870 | ChrVII_A_nidulans_FGSC_A4:2108305-2109591 | WT_5hasex | WT_veg | OK     | 34,2651  | 49,2645 | 0,523809      | -0,86038      | 0,38958    | 0,662967   | no  |
| AN1871 | ChrVII_A_nidulans_FGSC_A4:2109653-2111491 | WT_5hasex | WT_veg | OK     | 15,925   | 48,503  | 1,60678       | -2,91074      | 0,00360575 | 0,0228006  | yes |
| AN1872 | ChrVII_A_nidulans_FGSC_A4:2113234-2114429 | WT_5hasex | WT_veg | OK     | 7,17506  | 11,2927 | 0,654329      | -0,971264     | 0,331417   | 0,607766   | no  |
| AN1873 | ChrVII_A_nidulans_FGSC_A4:2115111-2117101 | WT_5hasex | WT_veg | OK     | 105,926  | 290,362 | 1,4548        | -2,99692      | 0,00272726 | 0,0180424  | yes |
| AN1875 | ChrVII_A_nidulans_FGSC_A4:2123689-2125123 | WT_5hasex | WT_veg | OK     | 43,1182  | 154,167 | 1,83813       | -3,76952      | 0,00016356 | 0,00167628 | yes |
| AN1876 | ChrVII_A_nidulans_FGSC_A4:2125575-2128111 | WT_5hasex | WT_veg | OK     | 41,7672  | 94,5798 | 1,17916       | -2,45496      | 0,0140902  | 0,0681391  | no  |
| AN1877 | ChrVII_A_nidulans_FGSC_A4:2129967-2131946 | WT_5hasex | WT_veg | OK     | 4,83177  | 3,17337 | -0,606535     | 0,850953      | 0,394795   | 0,667788   | no  |
| AN1879 | ChrVII_A_nidulans_FGSC_A4:2139125-2142347 | WT_5hasex | WT_veg | OK     | 80,9062  | 51,8322 | -0,642401     | 1,30002       | 0,193594   | 0,445434   | no  |
| AN1880 | ChrVII_A_nidulans_FGSC_A4:2144412-2146171 | WT_5hasex | WT_veg | OK     | 66,0795  | 105,133 | 0,669945      | -1,38478      | 0,166118   | 0,404768   | no  |
| AN1881 | ChrVII_A_nidulans_FGSC_A4:2149464-2150822 | WT_5hasex | WT_veg | OK     | 1,73888  | 4,27434 | 1,29754       | -1,52387      | 0,127542   | 0,340871   | no  |
| AN1882 | ChrVII_A_nidulans_FGSC_A4:2150871-2152368 | WT_5hasex | WT_veg | OK     | 66,6458  | 404,107 | 2,60015       | -5,10233      | 3,355E-07  | 6,9325E-06 | yes |
| AN1883 | ChrVII_A_nidulans_FGSC_A4:2152993-2154902 | WT_5hasex | WT_veg | OK     | 229,718  | 596,914 | 1,37766       | -2,73253      | 0,00628506 | 0,0358924  | yes |
| AN1885 | ChrVII_A_nidulans_FGSC_A4:2157305-2158338 | WT_5hasex | WT_veg | NOTEST | 0,288519 | 1,53772 | 2,41406       | -1,14174      | 0,253561   | 1          | no  |
| AN1886 | ChrVII_A_nidulans_FGSC_A4:2158828-2159693 | WT_5hasex | WT_veg | NOTEST | 0,246876 | 1,15103 | 2,22106       | -1,14626      | 0,251686   | 1          | no  |
| AN1887 | ChrVII_A_nidulans_FGSC_A4:2159932-2161657 | WT_5hasex | WT_veg | NOTEST | 0        | 2,05372 | 1.79769e+308  | 1.79769e+308  | 0,0037306  | 1          | no  |
| AN1888 | ChrVII_A_nidulans_FGSC_A4:2162181-2163092 | WT_5hasex | WT_veg | OK     | 1,04318  | 7,27836 | 2,80263       | -3,01158      | 0,00259893 | 0,0173468  | yes |
| AN1889 | ChrVII_A_nidulans_FGSC_A4:2166600-2168266 | WT_5hasex | WT_veg | NOTEST | 0,469083 | 0       | -1.79769e+308 | -1.79769e+308 | 0,114919   | 1          | no  |
| AN1890 | ChrVII_A_nidulans_FGSC_A4:2168939-2170122 | WT_5hasex | WT_veg | NOTEST | 0        | 0       | 0             | 0             | 1          | 1          | no  |
| AN1891 | ChrVII_A_nidulans_FGSC_A4:2170213-2171638 | WT_5hasex | WT_veg | OK     | 6,66165  | 21,9837 | 1,72249       | -2,55652      | 0,0105724  | 0,0544272  | no  |
| AN1892 | ChrVII_A_nidulans_FGSC_A4:2171869-2173166 | WT_5hasex | WT_veg | OK     | 155,04   | 1090,54 | 2,81434       | -5,61892      | 1,9216E-08 | 5,2227E-07 | yes |
| AN1893 | ChrVII_A_nidulans_FGSC_A4:2175079-2177634 | WT_5hasex | WT_veg | OK     | 53,7415  | 11,6374 | -2,20726      | 4,42888       | 9,4722E-06 | 0,00013708 | yes |
| AN1894 | ChrVII_A_nidulans_FGSC_A4:2179319-2181100 | WT_5hasex | WT_veg | OK     | 29,3721  | 73,2965 | 1,3193        | -2,44357      | 0,0145427  | 0,0698568  | no  |
| AN1898 | ChrVII_A_nidulans_FGSC_A4:2186943-2187751 | WT_5hasex | WT_veg | OK     | 33,1429  | 98,2722 | 1,56808       | -2,89409      | 0,0038026  | 0,023824   | yes |
| AN1900 | ChrVII_A_nidulans_FGSC_A4:2189888-2192576 | WT_5hasex | WT_veg | OK     | 48,8218  | 80,9962 | 0,730329      | -1,43966      | 0,149964   | 0,378846   | no  |
| AN1902 | ChrVII_A_nidulans_FGSC_A4:2201084-2203845 | WT_5hasex | WT_veg | OK     | 41,7808  | 204,671 | 2,2924        | -4,78463      | 1,7131E-06 | 2,9883E-05 | yes |



# Supplementary table 1

|        |                                           |           |        |        |          |          |               |               |            |                |
|--------|-------------------------------------------|-----------|--------|--------|----------|----------|---------------|---------------|------------|----------------|
| AN1903 | ChrVII_A_nidulans_FGSC_A4:2209871-2210498 | WT_5hasex | WT_veg | NOTEST | 0        | 0        | 0             | 0             | 1          | 1 no           |
| AN1904 | ChrVII_A_nidulans_FGSC_A4:2213662-2215925 | WT_5hasex | WT_veg | OK     | 115,447  | 210,672  | 0,867768      | -1,76333      | 0,077844   | 0,243214 no    |
| AN1906 | ChrVII_A_nidulans_FGSC_A4:2217590-2218978 | WT_5hasex | WT_veg | OK     | 25,3713  | 30,3208  | 0,257109      | -0,491364     | 0,623169   | 0,826027 no    |
| AN1907 | ChrVII_A_nidulans_FGSC_A4:2219466-2220879 | WT_5hasex | WT_veg | OK     | 49,2365  | 66,0869  | 0,424638      | -0,865052     | 0,387011   | 0,660504 no    |
| AN1908 | ChrVII_A_nidulans_FGSC_A4:2221159-2225064 | WT_5hasex | WT_veg | OK     | 13,1895  | 76,8364  | 2,54239       | -5,0211       | 5,1376E-07 | 1,011E-05 yes  |
| AN1909 | ChrVII_A_nidulans_FGSC_A4:2221159-2225064 | WT_5hasex | WT_veg | OK     | 45,5601  | 81,9433  | 0,846853      | -1,68846      | 0,0913237  | 0,271581 no    |
| AN1910 | ChrVII_A_nidulans_FGSC_A4:2227679-2228612 | WT_5hasex | WT_veg | OK     | 62,644   | 88,4475  | 0,497646      | -0,994428     | 0,320014   | 0,596204 no    |
| AN1911 | ChrVII_A_nidulans_FGSC_A4:2228881-2230593 | WT_5hasex | WT_veg | OK     | 86,5593  | 114,632  | 0,405249      | -0,830756     | 0,406112   | 0,677072 no    |
| AN1912 | ChrVII_A_nidulans_FGSC_A4:2232535-2235182 | WT_5hasex | WT_veg | NOTEST | 0,573482 | 1,42519  | 1,31333       | -1,39637      | 0,162602   | 1 no           |
| AN1913 | ChrVII_A_nidulans_FGSC_A4:2235601-2237816 | WT_5hasex | WT_veg | OK     | 94,6161  | 199,548  | 1,07658       | -2,20378      | 0,0275396  | 0,113534 no    |
| AN1914 | ChrVII_A_nidulans_FGSC_A4:2238378-2239596 | WT_5hasex | WT_veg | NOTEST | 0,188128 | 1,34803  | 2,84107       | -1,37594      | 0,168839   | 1 no           |
| AN1915 | ChrVII_A_nidulans_FGSC_A4:2239929-2241634 | WT_5hasex | WT_veg | OK     | 129,958  | 80,0189  | -0,699632     | 1,31955       | 0,186986   | 0,436362 no    |
| AN1919 | ChrVII_A_nidulans_FGSC_A4:2259589-2261441 | WT_5hasex | WT_veg | OK     | 23,6912  | 18,0434  | -0,39288      | 0,65937       | 0,509658   | 0,756023 no    |
| AN1920 | ChrVII_A_nidulans_FGSC_A4:2262137-2264266 | WT_5hasex | WT_veg | OK     | 58,9501  | 42,7219  | -0,464517     | 0,759546      | 0,447526   | 0,710592 no    |
| AN1922 | ChrVII_A_nidulans_FGSC_A4:2267390-2269194 | WT_5hasex | WT_veg | OK     | 139,38   | 178,019  | 0,353011      | -0,718935     | 0,472181   | 0,729444 no    |
| AN1923 | ChrVII_A_nidulans_FGSC_A4:2269922-2272231 | WT_5hasex | WT_veg | OK     | 286,262  | 204,794  | -0,48316      | 0,898407      | 0,368969   | 0,643653 no    |
| AN1924 | ChrVII_A_nidulans_FGSC_A4:2273329-2275347 | WT_5hasex | WT_veg | OK     | 108,393  | 269,516  | 1,31409       | -2,59638      | 0,00942126 | 0,0497023 yes  |
| AN1925 | ChrVII_A_nidulans_FGSC_A4:2277195-2277606 | WT_5hasex | WT_veg | NOTEST | 1,23767  | 0        | -1.79769e+308 | -1.79769e+308 | 0,137528   | 1 no           |
| AN1926 | ChrVII_A_nidulans_FGSC_A4:2278892-2280132 | WT_5hasex | WT_veg | OK     | 14,6695  | 87,5014  | 2,57649       | -3,88073      | 0,00010414 | 0,00113621 yes |
| AN1927 | ChrVII_A_nidulans_FGSC_A4:2282573-2285560 | WT_5hasex | WT_veg | OK     | 16,3874  | 53,5572  | 1,70849       | -3,43321      | 0,00059649 | 0,0050619 yes  |
| AN1928 | ChrVII_A_nidulans_FGSC_A4:2285797-2287432 | WT_5hasex | WT_veg | NOTEST | 0        | 0        | 0             | 0             | 1          | 1 no           |
| AN1929 | ChrVII_A_nidulans_FGSC_A4:2288429-2290789 | WT_5hasex | WT_veg | OK     | 13,3611  | 32,9527  | 1,30236       | -2,46644      | 0,0136462  | 0,0664334 no   |
| AN1930 | ChrVII_A_nidulans_FGSC_A4:2293472-2295038 | WT_5hasex | WT_veg | OK     | 5,79804  | 3,14824  | -0,881018     | 1,14973       | 0,250255   | 0,518756 no    |
| AN1931 | ChrVII_A_nidulans_FGSC_A4:2295347-2297461 | WT_5hasex | WT_veg | OK     | 25,9563  | 51,3706  | 0,984859      | -1,96847      | 0,0490144  | 0,175194 no    |
| AN1933 | ChrVII_A_nidulans_FGSC_A4:2304666-2306211 | WT_5hasex | WT_veg | OK     | 113,325  | 207,593  | 0,873285      | -1,81687      | 0,0692375  | 0,223741 no    |
| AN1934 | ChrVII_A_nidulans_FGSC_A4:2306668-2308360 | WT_5hasex | WT_veg | OK     | 3,8419   | 11,2784  | 1,55367       | -2,26603      | 0,0234498  | 0,100517 no    |
| AN1935 | ChrVII_A_nidulans_FGSC_A4:2308793-2310827 | WT_5hasex | WT_veg | OK     | 49,6397  | 288,428  | 2,53864       | -5,1636       | 2,4224E-07 | 5,1622E-06 yes |
| AN1936 | ChrVII_A_nidulans_FGSC_A4:2311291-2311988 | WT_5hasex | WT_veg | OK     | 50,0829  | 383,081  | 2,93526       | -5,48016      | 4,2495E-08 | 1,0727E-06 yes |
| AN1938 | ChrVII_A_nidulans_FGSC_A4:2319297-2320282 | WT_5hasex | WT_veg | NOTEST | 0,286935 | 0        | -1.79769e+308 | -1.79769e+308 | 0,224063   | 1 no           |
| AN1939 | ChrVII_A_nidulans_FGSC_A4:2321137-2324343 | WT_5hasex | WT_veg | OK     | 104,374  | 335,204  | 1,68328       | -3,29448      | 0,00098605 | 0,00775723 yes |
| AN1940 | ChrVII_A_nidulans_FGSC_A4:2327787-2331433 | WT_5hasex | WT_veg | OK     | 14,4058  | 9,87352  | -0,54501      | 1,10733       | 0,26815    | 0,539947 no    |
| AN1941 | ChrVII_A_nidulans_FGSC_A4:2332402-2333217 | WT_5hasex | WT_veg | OK     | 398,074  | 34,7536  | -3,5178       | 5,10022       | 3,3926E-07 | 7,0046E-06 yes |
| AN1942 | ChrVII_A_nidulans_FGSC_A4:2335118-2335627 | WT_5hasex | WT_veg | OK     | 4,78433  | 14,4351  | 1,59319       | -1,84541      | 0,0649784  | 0,213855 no    |
| AN1943 | ChrVII_A_nidulans_FGSC_A4:2336081-2337798 | WT_5hasex | WT_veg | OK     | 24,6969  | 40,9266  | 0,728708      | -1,42415      | 0,154404   | 0,386345 no    |
| AN1944 | ChrVII_A_nidulans_FGSC_A4:2338070-2340208 | WT_5hasex | WT_veg | OK     | 6,35657  | 17,1157  | 1,429         | -2,4091       | 0,0159919  | 0,0751816 no   |
| AN1945 | ChrVII_A_nidulans_FGSC_A4:2340455-2341468 | WT_5hasex | WT_veg | OK     | 40,1708  | 68,5721  | 0,771475      | -1,42647      | 0,153733   | 0,385228 no    |
| AN1946 | ChrVII_A_nidulans_FGSC_A4:2341921-2342944 | WT_5hasex | WT_veg | OK     | 10,6876  | 12,2999  | 0,202705      | -0,289672     | 0,772067   | 0,906578 no    |
| AN1947 | ChrVII_A_nidulans_FGSC_A4:2343024-2344089 | WT_5hasex | WT_veg | OK     | 22,787   | 55,8502  | 1,29335       | -1,9996       | 0,0455436  | 0,166011 no    |
| AN1948 | ChrVII_A_nidulans_FGSC_A4:2344351-2349513 | WT_5hasex | WT_veg | OK     | 53,6229  | 131,751  | 1,2969        | -2,3071       | 0,0210495  | 0,0927233 no   |
| AN1949 | ChrVII_A_nidulans_FGSC_A4:2351860-2354022 | WT_5hasex | WT_veg | OK     | 30,2292  | 240,303  | 2,99084       | -6,08275      | 1,1814E-09 | 4,1216E-08 yes |
| AN1950 | ChrVII_A_nidulans_FGSC_A4:2357811-2360552 | WT_5hasex | WT_veg | OK     | 58,5505  | 130,899  | 1,1607        | -2,40239      | 0,0162884  | 0,0762364 no   |
| AN1951 | ChrVII_A_nidulans_FGSC_A4:2360812-2362113 | WT_5hasex | WT_veg | OK     | 34,935   | 90,9367  | 1,38019       | -2,63428      | 0,0084316  | 0,0454747 yes  |
| AN1952 | ChrVII_A_nidulans_FGSC_A4:2364928-2366127 | WT_5hasex | WT_veg | OK     | 60,585   | 379,518  | 2,64714       | -5,00431      | 5,6063E-07 | 1,0938E-05 yes |
| AN1954 | ChrVII_A_nidulans_FGSC_A4:2369981-2371354 | WT_5hasex | WT_veg | OK     | 59,5291  | 180,522  | 1,6005        | -3,30677      | 0,00094379 | 0,00749103 yes |
| AN1955 | ChrVII_A_nidulans_FGSC_A4:2372220-2373853 | WT_5hasex | WT_veg | NOTEST | 1,57734  | 0,818845 | -0,945829     | 0,789069      | 0,430072   | 1 no           |
| AN1956 | ChrVII_A_nidulans_FGSC_A4:2375087-2379647 | WT_5hasex | WT_veg | OK     | 5,28098  | 6,00055  | 0,184291      | -0,33456      | 0,737957   | 0,88986 no     |
| AN1957 | ChrVII_A_nidulans_FGSC_A4:2380045-2381596 | WT_5hasex | WT_veg | OK     | 7,97399  | 28,5204  | 1,83862       | -3,0509       | 0,00228158 | 0,0155697 yes  |
| AN1958 | ChrVII_A_nidulans_FGSC_A4:2385198-2385673 | WT_5hasex | WT_veg | OK     | 2,74989  | 7,48708  | 1,44503       | -1,37701      | 0,16851    | 0,408507 no    |
| AN1960 | ChrVII_A_nidulans_FGSC_A4:2389564-2392307 | WT_5hasex | WT_veg | NOTEST | 0,704116 | 2,56526  | 1,86522       | -2,31729      | 0,0204877  | 1 no           |
| AN1962 | ChrVII_A_nidulans_FGSC_A4:2398827-2400974 | WT_5hasex | WT_veg | OK     | 3,13084  | 9,73254  | 1,63627       | -2,31261      | 0,0207439  | 0,0916774 no   |
| AN1963 | ChrVII_A_nidulans_FGSC_A4:2402664-2403855 | WT_5hasex | WT_veg | OK     | 28,1553  | 45,3453  | 0,687547      | -1,31331      | 0,189078   | 0,439338 no    |
| AN1964 | ChrVII_A_nidulans_FGSC_A4:2404749-2406461 | WT_5hasex | WT_veg | OK     | 845,257  | 1413,69  | 0,742002      | -1,24894      | 0,211686   | 0,470391 no    |
| AN1965 | ChrVII_A_nidulans_FGSC_A4:2406773-2408348 | WT_5hasex | WT_veg | OK     | 71,0051  | 308,39   | 2,11876       | -4,32839      | 1,502E-05  | 0,00020736 yes |

# Supplementary table 1

|        |                                           |           |        |        |         |          |           |            |            |            |     |
|--------|-------------------------------------------|-----------|--------|--------|---------|----------|-----------|------------|------------|------------|-----|
| AN1968 | ChrVII_A_nidulans_FGSC_A4:2427399-2428459 | WT_5hasex | WT_veg | OK     | 54,8241 | 56,355   | 0,0397345 | -0,0788882 | 0,937122   | 0,976458   | no  |
| AN1969 | ChrVII_A_nidulans_FGSC_A4:2428819-2429905 | WT_5hasex | WT_veg | OK     | 9,64933 | 41,9669  | 2,12075   | -2,9874    | 0,00281359 | 0,0185223  | yes |
| AN1970 | ChrVII_A_nidulans_FGSC_A4:2430132-2430997 | WT_5hasex | WT_veg | OK     | 174,988 | 355,836  | 1,02396   | -2,01757   | 0,0436362  | 0,160815   | no  |
| AN1971 | ChrVII_A_nidulans_FGSC_A4:2431144-2433001 | WT_5hasex | WT_veg | OK     | 55,7332 | 177,215  | 1,66889   | -3,47397   | 0,00051281 | 0,00444981 | yes |
| AN1972 | ChrVII_A_nidulans_FGSC_A4:2433019-2434772 | WT_5hasex | WT_veg | OK     | 34,9483 | 42,224   | 0,272843  | -0,547194  | 0,584245   | 0,803761   | no  |
| AN1973 | ChrVII_A_nidulans_FGSC_A4:2435570-2436742 | WT_5hasex | WT_veg | OK     | 260,583 | 448,733  | 0,784117  | -1,549     | 0,121383   | 0,33022    | no  |
| AN1975 | ChrVII_A_nidulans_FGSC_A4:2439922-2442468 | WT_5hasex | WT_veg | OK     | 29,9048 | 45,258   | 0,597798  | -1,22577   | 0,220285   | 0,481676   | no  |
| AN1976 | ChrVII_A_nidulans_FGSC_A4:2442967-2444786 | WT_5hasex | WT_veg | OK     | 20,7807 | 54,7001  | 1,3963    | -2,6366    | 0,00837406 | 0,0452016  | yes |
| AN1977 | ChrVII_A_nidulans_FGSC_A4:2445120-2445714 | WT_5hasex | WT_veg | OK     | 7,85937 | 17,5547  | 1,15937   | -1,57916   | 0,114298   | 0,317172   | no  |
| AN1978 | ChrVII_A_nidulans_FGSC_A4:2447249-2447865 | WT_5hasex | WT_veg | OK     | 2,17424 | 3,84056  | 0,820807  | -0,688963  | 0,490847   | 0,74323    | no  |
| AN1979 | ChrVII_A_nidulans_FGSC_A4:2448114-2448485 | WT_5hasex | WT_veg | OK     | 24,3777 | 36,5405  | 0,583932  | -0,811574  | 0,417036   | 0,686008   | no  |
| AN1980 | ChrVII_A_nidulans_FGSC_A4:2448930-2451772 | WT_5hasex | WT_veg | OK     | 22,4052 | 22,7482  | 0,0219216 | -0,0445701 | 0,96445    | 0,987112   | no  |
| AN1981 | ChrVII_A_nidulans_FGSC_A4:2452519-2453794 | WT_5hasex | WT_veg | OK     | 27,5391 | 44,2095  | 0,682874  | -1,29766   | 0,194405   | 0,446534   | no  |
| AN1982 | ChrVII_A_nidulans_FGSC_A4:2454324-2457092 | WT_5hasex | WT_veg | OK     | 2,87139 | 1,1039   | -1,37914  | 1,65156    | 0,0986253  | 0,286499   | no  |
| AN1983 | ChrVII_A_nidulans_FGSC_A4:2457387-2460326 | WT_5hasex | WT_veg | OK     | 16,8432 | 93,4729  | 2,47238   | -4,82682   | 1,3873E-06 | 2,4643E-05 | yes |
| AN1984 | ChrVII_A_nidulans_FGSC_A4:2462311-2464859 | WT_5hasex | WT_veg | OK     | 55,2341 | 75,9477  | 0,459445  | -0,956025  | 0,33906    | 0,61501    | no  |
| AN1986 | ChrVII_A_nidulans_FGSC_A4:2467992-2468805 | WT_5hasex | WT_veg | OK     | 151,253 | 294,874  | 0,963132  | -1,9897    | 0,0466237  | 0,169031   | no  |
| AN1987 | ChrVII_A_nidulans_FGSC_A4:2469119-2470554 | WT_5hasex | WT_veg | OK     | 15,5238 | 69,0427  | 2,153     | -3,93959   | 8,162E-05  | 0,00091782 | yes |
| AN1988 | ChrVII_A_nidulans_FGSC_A4:2470686-2472966 | WT_5hasex | WT_veg | OK     | 18,9339 | 17,2516  | -0,134241 | 0,26621    | 0,790077   | 0,914408   | no  |
| AN1989 | ChrVII_A_nidulans_FGSC_A4:2474153-2476054 | WT_5hasex | WT_veg | OK     | 39,8563 | 65,9863  | 0,727357  | -1,47561   | 0,140049   | 0,362627   | no  |
| AN1990 | ChrVII_A_nidulans_FGSC_A4:2476499-2478711 | WT_5hasex | WT_veg | OK     | 130,631 | 783,033  | 2,58358   | -4,84453   | 1,2692E-06 | 2,2753E-05 | yes |
| AN1992 | ChrVII_A_nidulans_FGSC_A4:2485377-2487393 | WT_5hasex | WT_veg | OK     | 23,2505 | 37,3276  | 0,68298   | -1,38414   | 0,166316   | 0,405003   | no  |
| AN1993 | ChrVII_A_nidulans_FGSC_A4:2489126-2490977 | WT_5hasex | WT_veg | OK     | 433,71  | 637,245  | 0,555116  | -1,03236   | 0,301905   | 0,577683   | no  |
| AN1995 | ChrVII_A_nidulans_FGSC_A4:2495269-2497980 | WT_5hasex | WT_veg | OK     | 19,3664 | 31,9768  | 0,723469  | -1,39366   | 0,163419   | 0,400425   | no  |
| AN1996 | ChrVII_A_nidulans_FGSC_A4:2499125-2501271 | WT_5hasex | WT_veg | OK     | 42,5051 | 74,067   | 0,801196  | -1,58853   | 0,112165   | 0,313071   | no  |
| AN1997 | ChrVII_A_nidulans_FGSC_A4:2502495-2503937 | WT_5hasex | WT_veg | OK     | 24,6385 | 201,912  | 3,03474   | -5,93293   | 2,9758E-09 | 9,5337E-08 | yes |
| AN1998 | ChrVII_A_nidulans_FGSC_A4:2508604-2509669 | WT_5hasex | WT_veg | OK     | 9,26265 | 23,0551  | 1,31559   | -2,05658   | 0,0397267  | 0,150125   | no  |
| AN1999 | ChrVII_A_nidulans_FGSC_A4:2510615-2511659 | WT_5hasex | WT_veg | OK     | 67,0076 | 97,009   | 0,533793  | -1,07229   | 0,283591   | 0,557374   | no  |
| AN2001 | ChrVII_A_nidulans_FGSC_A4:2517458-2520149 | WT_5hasex | WT_veg | OK     | 260,144 | 308,809  | 0,247404  | -0,427317  | 0,669149   | 0,851995   | no  |
| AN2002 | ChrVII_A_nidulans_FGSC_A4:2522747-2524767 | WT_5hasex | WT_veg | OK     | 47,8706 | 68,6266  | 0,519627  | -0,995933  | 0,319283   | 0,595347   | no  |
| AN2004 | ChrVII_A_nidulans_FGSC_A4:2532014-2532590 | WT_5hasex | WT_veg | OK     | 8,35592 | 7,2238   | -0,210039 | 0,246694   | 0,805145   | 0,921686   | no  |
| AN2006 | ChrVII_A_nidulans_FGSC_A4:2540905-2542362 | WT_5hasex | WT_veg | OK     | 21,1302 | 36,5394  | 0,790144  | -1,49803   | 0,134124   | 0,352813   | no  |
| AN2007 | ChrVII_A_nidulans_FGSC_A4:2542572-2543262 | WT_5hasex | WT_veg | OK     | 115,516 | 258,536  | 1,16227   | -2,34498   | 0,0190279  | 0,0856835  | no  |
| AN2008 | ChrVII_A_nidulans_FGSC_A4:2543530-2544295 | WT_5hasex | WT_veg | OK     | 34,9392 | 68,7303  | 0,976101  | -1,81423   | 0,0696429  | 0,226463   | no  |
| AN2010 | ChrVII_A_nidulans_FGSC_A4:2551148-2552218 | WT_5hasex | WT_veg | OK     | 112,164 | 38,8969  | -1,52788  | 3,00205    | 0,00268171 | 0,0177964  | yes |
| AN2011 | ChrVII_A_nidulans_FGSC_A4:2553807-2558874 | WT_5hasex | WT_veg | OK     | 13,0795 | 44,0838  | 1,75294   | -3,64904   | 0,00026323 | 0,00252814 | yes |
| AN2013 | ChrVII_A_nidulans_FGSC_A4:2565192-2566447 | WT_5hasex | WT_veg | OK     | 56,5082 | 248,843  | 2,1387    | -4,27074   | 1,9483E-05 | 0,00026044 | yes |
| AN2014 | ChrVII_A_nidulans_FGSC_A4:2566514-2568804 | WT_5hasex | WT_veg | OK     | 61,399  | 76,4144  | 0,315628  | -0,654485  | 0,5128     | 0,757839   | no  |
| AN2015 | ChrVII_A_nidulans_FGSC_A4:2570364-2572440 | WT_5hasex | WT_veg | OK     | 92,6489 | 219,877  | 1,24685   | -2,51457   | 0,0119177  | 0,0598364  | no  |
| AN2019 | ChrVII_A_nidulans_FGSC_A4:2582709-2583183 | WT_5hasex | WT_veg | OK     | 10,4209 | 93,5296  | 3,16595   | -4,47928   | 7,4894E-06 | 0,00011118 | yes |
| AN2020 | ChrVII_A_nidulans_FGSC_A4:2588579-2589933 | WT_5hasex | WT_veg | OK     | 202,525 | 147,767  | -0,454773 | 0,84203    | 0,399771   | 0,672096   | no  |
| AN2021 | ChrVII_A_nidulans_FGSC_A4:2603286-2607323 | WT_5hasex | WT_veg | OK     | 35,6251 | 27,416   | -0,377875 | 0,772923   | 0,439568   | 0,703851   | no  |
| AN2022 | ChrVII_A_nidulans_FGSC_A4:2607674-2609439 | WT_5hasex | WT_veg | OK     | 27,4578 | 157,121  | 2,51658   | -4,78787   | 1,6856E-06 | 2,9462E-05 | yes |
| AN2023 | ChrVII_A_nidulans_FGSC_A4:2610650-2611960 | WT_5hasex | WT_veg | OK     | 37,8554 | 228,768  | 2,59531   | -4,87903   | 1,0661E-06 | 1,9424E-05 | yes |
| AN2024 | ChrVII_A_nidulans_FGSC_A4:2614445-2615152 | WT_5hasex | WT_veg | NOTEST | 1,8687  | 2,31423  | 0,308499  | -0,247405  | 0,804595   | 1          | no  |
| AN2025 | ChrVII_A_nidulans_FGSC_A4:2615524-2617778 | WT_5hasex | WT_veg | OK     | 4,45004 | 15,1871  | 1,77096   | -2,57281   | 0,0100877  | 0,0524627  | no  |
| AN2026 | ChrVII_A_nidulans_FGSC_A4:2618708-2619371 | WT_5hasex | WT_veg | OK     | 30,4995 | 74,1813  | 1,28227   | -2,25753   | 0,0239748  | 0,102157   | no  |
| AN2029 | ChrVII_A_nidulans_FGSC_A4:2626344-2627879 | WT_5hasex | WT_veg | OK     | 47,1677 | 125,41   | 1,41078   | -2,72253   | 0,00647844 | 0,0368003  | yes |
| AN2030 | ChrVII_A_nidulans_FGSC_A4:2638096-2638772 | WT_5hasex | WT_veg | OK     | 89,7591 | 13,7381  | -2,70788  | 4,88997    | 1,0085E-06 | 1,8453E-05 | yes |
| AN2031 | ChrVII_A_nidulans_FGSC_A4:2639262-2640105 | WT_5hasex | WT_veg | OK     | 14,4274 | 1,99947  | -2,85112  | 2,92639    | 0,00342916 | 0,0218793  | yes |
| AN2032 | ChrVII_A_nidulans_FGSC_A4:2640607-2647359 | WT_5hasex | WT_veg | OK     | 2,08645 | 0,403534 | -2,37029  | 3,0029     | 0,00267424 | 0,017755   | yes |
| AN2033 | ChrVII_A_nidulans_FGSC_A4:2647940-2649248 | WT_5hasex | WT_veg | OK     | 39,104  | 6,59556  | -3,41758  | 5,53647    | 3,0863E-08 | 8,0382E-07 | yes |
| AN2034 | ChrVII_A_nidulans_FGSC_A4:2649537-2650119 | WT_5hasex | WT_veg | OK     | 23,246  | 3,12416  | -2,89544  | 2,93025    | 0,00338688 | 0,0216491  | yes |

## Supplementary table 1

|        |                                           |           |        |        |         |          |               |               |            |            |     |
|--------|-------------------------------------------|-----------|--------|--------|---------|----------|---------------|---------------|------------|------------|-----|
| AN2035 | ChrVII_A_nidulans_FGSC_A4:2650660-2658445 | WT_5hasex | WT_veg | NOTEST | 1,3717  | 0,151016 | -3,1832       | 2,85961       | 0,00424157 | 1          | no  |
| AN2036 | ChrVII_A_nidulans_FGSC_A4:2659136-2661447 | WT_5hasex | WT_veg | OK     | 3,31943 | 1,63431  | -1,02226      | 1,20538       | 0,228055   | 0,491165   | no  |
| AN2037 | ChrVII_A_nidulans_FGSC_A4:2663256-2664479 | WT_5hasex | WT_veg | OK     | 371,147 | 41,4374  | -3,16299      | 5,54241       | 2,9833E-08 | 7,7893E-07 | yes |
| AN2038 | ChrVII_A_nidulans_FGSC_A4:2667020-2668412 | WT_5hasex | WT_veg | OK     | 27,5408 | 3,89801  | -2,82076      | 4,74029       | 2,1341E-06 | 3,6451E-05 | yes |
| AN2039 | ChrVII_A_nidulans_FGSC_A4:2670496-2671463 | WT_5hasex | WT_veg | OK     | 2,43394 | 6,75582  | 1,47284       | -1,72883      | 0,083839   | 0,256218   | no  |
| AN2041 | ChrVII_A_nidulans_FGSC_A4:2676074-2677208 | WT_5hasex | WT_veg | NOTEST | 1,06467 | 0        | -1.79769e+308 | -1.79769e+308 | 0,0341693  | 1          | no  |
| AN2042 | ChrVII_A_nidulans_FGSC_A4:2677653-2679909 | WT_5hasex | WT_veg | OK     | 173,471 | 107,98   | -0,68393      | 1,26398       | 0,206238   | 0,462996   | no  |
| AN2043 | ChrVII_A_nidulans_FGSC_A4:2682641-2684541 | WT_5hasex | WT_veg | OK     | 26,0094 | 33,5986  | 0,369368      | -0,626995     | 0,530663   | 0,77       | no  |
| AN2044 | ChrVII_A_nidulans_FGSC_A4:2686178-2687787 | WT_5hasex | WT_veg | OK     | 54,5217 | 44,0601  | -0,307358     | 0,52461       | 0,599855   | 0,813138   | no  |
| AN2045 | ChrVII_A_nidulans_FGSC_A4:2687935-2690187 | WT_5hasex | WT_veg | OK     | 55,0483 | 65,6424  | 0,253929      | -0,525489     | 0,599243   | 0,812799   | no  |
| AN2046 | ChrVII_A_nidulans_FGSC_A4:2690482-2692305 | WT_5hasex | WT_veg | OK     | 25,4287 | 39,9217  | 0,650717      | -1,19457      | 0,232254   | 0,496616   | no  |
| AN2049 | ChrVII_A_nidulans_FGSC_A4:2696468-2698376 | WT_5hasex | WT_veg | OK     | 33,6473 | 37,78    | 0,167133      | -0,337724     | 0,735571   | 0,888573   | no  |
| AN2050 | ChrVII_A_nidulans_FGSC_A4:2698525-2699737 | WT_5hasex | WT_veg | OK     | 166,046 | 300,83   | 0,85736       | -1,74252      | 0,0814168  | 0,250759   | no  |
| AN2052 | ChrVII_A_nidulans_FGSC_A4:2701905-2704379 | WT_5hasex | WT_veg | OK     | 88,5248 | 108,992  | 0,30007       | -0,60746      | 0,543545   | 0,778008   | no  |
| AN2054 | ChrVII_A_nidulans_FGSC_A4:2706603-2708649 | WT_5hasex | WT_veg | OK     | 11,8429 | 16,034   | 0,437109      | -0,800796     | 0,42325    | 0,691133   | no  |
| AN2055 | ChrVII_A_nidulans_FGSC_A4:2710375-2712565 | WT_5hasex | WT_veg | OK     | 74,0506 | 416,651  | 2,49225       | -5,10107      | 3,3774E-07 | 6,9761E-06 | yes |
| AN2056 | ChrVII_A_nidulans_FGSC_A4:2712844-2714537 | WT_5hasex | WT_veg | OK     | 110,881 | 230,047  | 1,05292       | -2,16721      | 0,0302189  | 0,121998   | no  |
| AN2057 | ChrVII_A_nidulans_FGSC_A4:2714783-2715800 | WT_5hasex | WT_veg | OK     | 150,273 | 261,824  | 0,801013      | -1,60965      | 0,107475   | 0,304621   | no  |
| AN2058 | ChrVII_A_nidulans_FGSC_A4:2716535-2718265 | WT_5hasex | WT_veg | OK     | 32,6642 | 31,4439  | -0,0549327    | 0,108284      | 0,91377    | 0,967205   | no  |
| AN2063 | ChrVII_A_nidulans_FGSC_A4:2730753-2733710 | WT_5hasex | WT_veg | OK     | 74,5596 | 180,833  | 1,27819       | -2,6334       | 0,00845357 | 0,0455698  | yes |
| AN2064 | ChrVII_A_nidulans_FGSC_A4:2734447-2737626 | WT_5hasex | WT_veg | OK     | 16,7536 | 66,7541  | 1,99439       | -3,70912      | 0,00020799 | 0,00206261 | yes |
| AN2066 | ChrVII_A_nidulans_FGSC_A4:2743458-2746214 | WT_5hasex | WT_veg | OK     | 39,7837 | 77,7578  | 0,966808      | -2,00156      | 0,0453325  | 0,165483   | no  |
| AN2067 | ChrVII_A_nidulans_FGSC_A4:2747062-2749760 | WT_5hasex | WT_veg | OK     | 27,0532 | 80,9038  | 1,58041       | -3,19079      | 0,00141882 | 0,0104806  | yes |
| AN2068 | ChrVII_A_nidulans_FGSC_A4:2753420-2757730 | WT_5hasex | WT_veg | OK     | 29,4763 | 72,2281  | 1,29301       | -2,69869      | 0,00696134 | 0,038944   | yes |
| AN2069 | ChrVII_A_nidulans_FGSC_A4:2758412-2759721 | WT_5hasex | WT_veg | OK     | 387,239 | 702,635  | 0,859551      | -1,6615       | 0,0966133  | 0,282374   | no  |
| AN2070 | ChrVII_A_nidulans_FGSC_A4:2760686-2762645 | WT_5hasex | WT_veg | OK     | 17,5926 | 26,8561  | 0,610282      | -1,15018      | 0,250068   | 0,51846    | no  |
| AN2071 | ChrVII_A_nidulans_FGSC_A4:2763312-2765664 | WT_5hasex | WT_veg | OK     | 47,9545 | 97,5672  | 1,02473       | -2,11137      | 0,0347408  | 0,135954   | no  |
| AN2072 | ChrVII_A_nidulans_FGSC_A4:2766287-2769687 | WT_5hasex | WT_veg | OK     | 8,39148 | 17,2056  | 1,03588       | -1,93613      | 0,0528518  | 0,184464   | no  |
| AN2073 | ChrVII_A_nidulans_FGSC_A4:2770375-2775339 | WT_5hasex | WT_veg | OK     | 9,76668 | 10,1526  | 0,0559149     | -0,109906     | 0,912484   | 0,966859   | no  |
| AN2074 | ChrVII_A_nidulans_FGSC_A4:2777268-2778887 | WT_5hasex | WT_veg | OK     | 107,017 | 161,022  | 0,589412      | -0,92049      | 0,357317   | 0,632539   | no  |
| AN2075 | ChrVII_A_nidulans_FGSC_A4:2779850-2781843 | WT_5hasex | WT_veg | OK     | 40,5293 | 116,25   | 1,52019       | -2,43652      | 0,0148295  | 0,0709194  | no  |
| AN2076 | ChrVII_A_nidulans_FGSC_A4:2783826-2787285 | WT_5hasex | WT_veg | OK     | 30,878  | 50,8066  | 0,718439      | -1,40242      | 0,160789   | 0,396426   | no  |
| AN2077 | ChrVII_A_nidulans_FGSC_A4:2787888-2790637 | WT_5hasex | WT_veg | OK     | 6,16789 | 42,9764  | 2,80069       | -4,8224       | 1,4184E-06 | 2,5144E-05 | yes |
| AN2078 | ChrVII_A_nidulans_FGSC_A4:2791135-2795725 | WT_5hasex | WT_veg | OK     | 13,3821 | 17,4339  | 0,381596      | -0,771043     | 0,440681   | 0,704902   | no  |
| AN2079 | ChrVII_A_nidulans_FGSC_A4:2796306-2796900 | WT_5hasex | WT_veg | OK     | 36,3496 | 113,572  | 1,64359       | -2,89495      | 0,00379219 | 0,0237702  | yes |
| AN2080 | ChrVII_A_nidulans_FGSC_A4:2796967-2799469 | WT_5hasex | WT_veg | OK     | 92,4362 | 248,592  | 1,42725       | -2,89325      | 0,00381274 | 0,0238647  | yes |
| AN2081 | ChrVII_A_nidulans_FGSC_A4:2799929-2802146 | WT_5hasex | WT_veg | OK     | 21,7487 | 30,0137  | 0,464694      | -0,919091     | 0,358048   | 0,633149   | no  |
| AN2082 | ChrVII_A_nidulans_FGSC_A4:2802343-2803985 | WT_5hasex | WT_veg | OK     | 54,1001 | 107,678  | 0,993014      | -2,03791      | 0,0415586  | 0,1551     | no  |
| AN2083 | ChrVII_A_nidulans_FGSC_A4:2804129-2806076 | WT_5hasex | WT_veg | OK     | 8,50072 | 9,61555  | 0,177785      | -0,306826     | 0,758976   | 0,900238   | no  |
| AN2084 | ChrVII_A_nidulans_FGSC_A4:2811586-2815780 | WT_5hasex | WT_veg | OK     | 14,7239 | 30,3176  | 1,042         | -2,04569      | 0,0407867  | 0,152927   | no  |
| AN2085 | ChrVII_A_nidulans_FGSC_A4:2815938-2817071 | WT_5hasex | WT_veg | OK     | 198,019 | 297,41   | 0,586812      | -1,20477      | 0,228292   | 0,491304   | no  |
| AN2088 | ChrVII_A_nidulans_FGSC_A4:2822328-2828770 | WT_5hasex | WT_veg | OK     | 12,2585 | 36,8725  | 1,58877       | -2,63614      | 0,00838563 | 0,0452454  | yes |
| AN2090 | ChrVII_A_nidulans_FGSC_A4:2833085-2835168 | WT_5hasex | WT_veg | OK     | 21,0906 | 122,964  | 2,54356       | -5,14007      | 2,7463E-07 | 5,789E-06  | yes |
| AN2091 | ChrVII_A_nidulans_FGSC_A4:2835182-2836839 | WT_5hasex | WT_veg | OK     | 62,693  | 150,641  | 1,26474       | -2,62876      | 0,00856979 | 0,0460967  | yes |
| AN2093 | ChrVII_A_nidulans_FGSC_A4:2838898-2841156 | WT_5hasex | WT_veg | OK     | 16,9832 | 23,0087  | 0,438077      | -0,84802      | 0,396427   | 0,669472   | no  |
| AN2095 | ChrVII_A_nidulans_FGSC_A4:2848653-2849649 | WT_5hasex | WT_veg | OK     | 4,89035 | 6,42813  | 0,394463      | -0,518806     | 0,603896   | 0,815644   | no  |
| AN2096 | ChrVII_A_nidulans_FGSC_A4:2849665-2852047 | WT_5hasex | WT_veg | OK     | 18,5348 | 12,4533  | -0,573718     | 1,11176       | 0,266243   | 0,537796   | no  |
| AN2097 | ChrVII_A_nidulans_FGSC_A4:2853064-2854163 | WT_5hasex | WT_veg | OK     | 1,97209 | 3,34145  | 0,760749      | -0,619921     | 0,535309   | 0,772784   | no  |
| AN2098 | ChrVII_A_nidulans_FGSC_A4:2854526-2855178 | WT_5hasex | WT_veg | OK     | 57,1893 | 196,975  | 1,7842        | -3,20624      | 0,0013448  | 0,0100385  | yes |
| AN2099 | ChrVII_A_nidulans_FGSC_A4:2855967-2857389 | WT_5hasex | WT_veg | OK     | 2411,27 | 8662,83  | 1,84504       | -1,82221      | 0,0684233  | 0,22193    | no  |
| AN2100 | ChrVII_A_nidulans_FGSC_A4:2858118-2859657 | WT_5hasex | WT_veg | OK     | 14,5883 | 17,3704  | 0,251821      | -0,457868     | 0,647047   | 0,839983   | no  |
| AN2101 | ChrVII_A_nidulans_FGSC_A4:2860316-2863838 | WT_5hasex | WT_veg | OK     | 26,1775 | 24,3241  | -0,105935     | 0,218951      | 0,826688   | 0,931066   | no  |
| AN2102 | ChrVII_A_nidulans_FGSC_A4:2863859-2864670 | WT_5hasex | WT_veg | OK     | 8,69355 | 18,4134  | 1,08274       | -1,54973      | 0,121206   | 0,329893   | no  |

## Supplementary table 1

|        |                                           |           |        |        |          |         |              |              |            |            |     |
|--------|-------------------------------------------|-----------|--------|--------|----------|---------|--------------|--------------|------------|------------|-----|
| AN2103 | ChrVII_A_nidulans_FGSC_A4:2865022-2865642 | WT_5hasex | WT_veg | OK     | 89,8525  | 118,305 | 0,396885     | -0,754352    | 0,450638   | 0,712756   | no  |
| AN2104 | ChrVII_A_nidulans_FGSC_A4:2865831-2866626 | WT_5hasex | WT_veg | OK     | 4,71349  | 18,0306 | 1,93558      | -2,57147     | 0,0101267  | 0,052629   | no  |
| AN2106 | ChrVII_A_nidulans_FGSC_A4:2867909-2871035 | WT_5hasex | WT_veg | OK     | 33,7224  | 43,3852 | 0,363495     | -0,753444    | 0,451183   | 0,713075   | no  |
| AN2107 | ChrVII_A_nidulans_FGSC_A4:2871412-2874200 | WT_5hasex | WT_veg | OK     | 38,4306  | 30,0806 | -0,353421    | 0,712477     | 0,476169   | 0,732276   | no  |
| AN2108 | ChrVII_A_nidulans_FGSC_A4:2883999-2885524 | WT_5hasex | WT_veg | OK     | 16,8947  | 25,7367 | 0,607256     | -1,05388     | 0,291937   | 0,566616   | no  |
| AN2110 | ChrVII_A_nidulans_FGSC_A4:2892311-2893680 | WT_5hasex | WT_veg | OK     | 11,2506  | 14,0496 | 0,320524     | -0,525755    | 0,599059   | 0,812631   | no  |
| AN2111 | ChrVII_A_nidulans_FGSC_A4:2894366-2895537 | WT_5hasex | WT_veg | OK     | 7,0797   | 12,4183 | 0,810702     | -1,19618     | 0,231627   | 0,495963   | no  |
| AN2112 | ChrVII_A_nidulans_FGSC_A4:2896201-2897538 | WT_5hasex | WT_veg | OK     | 14,8245  | 7,5985  | -0,964198    | 1,5175       | 0,129141   | 0,343786   | no  |
| AN2113 | ChrVII_A_nidulans_FGSC_A4:2898024-2899853 | WT_5hasex | WT_veg | OK     | 12,554   | 20,4929 | 0,706981     | -1,25614     | 0,209064   | 0,466762   | no  |
| AN2114 | ChrVII_A_nidulans_FGSC_A4:2905460-2906938 | WT_5hasex | WT_veg | OK     | 20,2285  | 15,1188 | -0,420043    | 0,750157     | 0,45316    | 0,714546   | no  |
| AN2115 | ChrVII_A_nidulans_FGSC_A4:2907839-2909275 | WT_5hasex | WT_veg | OK     | 23,1776  | 24,6397 | 0,0882537    | -0,168021    | 0,866567   | 0,948839   | no  |
| AN2116 | ChrVII_A_nidulans_FGSC_A4:2914051-2915002 | WT_5hasex | WT_veg | OK     | 7,8313   | 1,75519 | -2,15763     | 1,95906      | 0,0501058  | 0,177798   | no  |
| AN2117 | ChrVII_A_nidulans_FGSC_A4:2915862-2916366 | WT_5hasex | WT_veg | OK     | 0,846117 | 9,25863 | 3,45187      | -2,76129     | 0,00575734 | 0,0333772  | yes |
| AN2118 | ChrVII_A_nidulans_FGSC_A4:2918522-2919536 | WT_5hasex | WT_veg | OK     | 14,0963  | 14,5123 | 0,0419596    | -0,0691165   | 0,944897   | 0,979356   | no  |
| AN2119 | ChrVII_A_nidulans_FGSC_A4:2920755-2924697 | WT_5hasex | WT_veg | OK     | 97,4511  | 176,951 | 0,860602     | -1,69556     | 0,0899686  | 0,269096   | no  |
| AN2120 | ChrVII_A_nidulans_FGSC_A4:2925432-2929217 | WT_5hasex | WT_veg | OK     | 37,0992  | 258,201 | 2,79903      | -5,54271     | 2,9783E-08 | 7,784E-07  | yes |
| AN2121 | ChrVII_A_nidulans_FGSC_A4:2930257-2931463 | WT_5hasex | WT_veg | OK     | 3,03958  | 10,0158 | 1,72033      | -2,35536     | 0,0185049  | 0,0839019  | no  |
| AN2122 | ChrVII_A_nidulans_FGSC_A4:2936093-2938366 | WT_5hasex | WT_veg | OK     | 24,3     | 40,258  | 0,728319     | -1,46193     | 0,14376    | 0,368901   | no  |
| AN2123 | ChrVII_A_nidulans_FGSC_A4:2939363-2940270 | WT_5hasex | WT_veg | OK     | 12,7238  | 30,8083 | 1,27578      | -2,06532     | 0,0388927  | 0,147728   | no  |
| AN2124 | ChrVII_A_nidulans_FGSC_A4:2940499-2941559 | WT_5hasex | WT_veg | OK     | 25,8041  | 31,5958 | 0,292133     | -0,523344    | 0,600735   | 0,813641   | no  |
| AN2126 | ChrVII_A_nidulans_FGSC_A4:2951217-2953044 | WT_5hasex | WT_veg | OK     | 86,4006  | 146,959 | 0,766301     | -1,58461     | 0,113056   | 0,314756   | no  |
| AN2127 | ChrVII_A_nidulans_FGSC_A4:2953539-2954127 | WT_5hasex | WT_veg | NOTEST | 0        | 0       | 0            | 0            | 1          | 1          | no  |
| AN2128 | ChrVII_A_nidulans_FGSC_A4:2957158-2959641 | WT_5hasex | WT_veg | OK     | 38,3366  | 79,662  | 1,05517      | -2,17799     | 0,0294066  | 0,119464   | no  |
| AN2130 | ChrVII_A_nidulans_FGSC_A4:2962880-2966731 | WT_5hasex | WT_veg | OK     | 46,3998  | 73,5518 | 0,664643     | -1,34278     | 0,179342   | 0,425183   | no  |
| AN2132 | ChrVII_A_nidulans_FGSC_A4:2981866-2983174 | WT_5hasex | WT_veg | OK     | 26,8577  | 22,6426 | -0,246296    | 0,456643     | 0,647928   | 0,84033    | no  |
| AN2133 | ChrVII_A_nidulans_FGSC_A4:2983569-2984448 | WT_5hasex | WT_veg | OK     | 212,458  | 251,036 | 0,240717     | -0,388659    | 0,697528   | 0,867869   | no  |
| AN2134 | ChrVII_A_nidulans_FGSC_A4:2984685-2987271 | WT_5hasex | WT_veg | OK     | 45,3405  | 57,0605 | 0,331692     | -0,678079    | 0,497721   | 0,748246   | no  |
| AN2135 | ChrVII_A_nidulans_FGSC_A4:2987711-2989666 | WT_5hasex | WT_veg | OK     | 11,1797  | 24,9525 | 1,1583       | -2,11316     | 0,0345872  | 0,13553    | no  |
| AN2136 | ChrVII_A_nidulans_FGSC_A4:2990625-2992943 | WT_5hasex | WT_veg | OK     | 28,4366  | 53,6743 | 0,916483     | -1,87246     | 0,0611436  | 0,204876   | no  |
| AN2137 | ChrVII_A_nidulans_FGSC_A4:2997245-2999401 | WT_5hasex | WT_veg | OK     | 60,1662  | 113,103 | 0,910605     | -1,84803     | 0,0645973  | 0,212962   | no  |
| AN2138 | ChrVII_A_nidulans_FGSC_A4:3000333-3004531 | WT_5hasex | WT_veg | OK     | 7,49174  | 17,6826 | 1,23896      | -2,36577     | 0,0179928  | 0,0821478  | no  |
| AN2139 | ChrVII_A_nidulans_FGSC_A4:3004835-3005734 | WT_5hasex | WT_veg | OK     | 25,5553  | 42,0288 | 0,717753     | -1,27776     | 0,201335   | 0,456488   | no  |
| AN2140 | ChrVII_A_nidulans_FGSC_A4:3005799-3007089 | WT_5hasex | WT_veg | OK     | 100,878  | 113,564 | 0,170903     | -0,352547    | 0,724428   | 0,882828   | no  |
| AN2143 | ChrVII_A_nidulans_FGSC_A4:3015306-3018989 | WT_5hasex | WT_veg | OK     | 13,0472  | 29,2203 | 1,16323      | -2,34347     | 0,0191052  | 0,0859578  | no  |
| AN2144 | ChrVII_A_nidulans_FGSC_A4:3019839-3020913 | WT_5hasex | WT_veg | OK     | 10,789   | 4,50856 | -1,25883     | 1,78464      | 0,0743197  | 0,235019   | no  |
| AN2145 | ChrVII_A_nidulans_FGSC_A4:3021369-3022900 | WT_5hasex | WT_veg | OK     | 8,9314   | 23,102  | 1,37106      | -2,26417     | 0,0235638  | 0,100848   | no  |
| AN2146 | ChrVII_A_nidulans_FGSC_A4:3024624-3025719 | WT_5hasex | WT_veg | OK     | 14,8501  | 89,7617 | 2,59562      | -4,38659     | 1,1514E-05 | 0,00016272 | yes |
| AN2148 | ChrVII_A_nidulans_FGSC_A4:3031802-3034303 | WT_5hasex | WT_veg | OK     | 17,9774  | 29,5467 | 0,716814     | -1,41305     | 0,157641   | 0,391762   | no  |
| AN2150 | ChrVII_A_nidulans_FGSC_A4:3036681-3039067 | WT_5hasex | WT_veg | OK     | 71,1139  | 136,207 | 0,937595     | -1,94678     | 0,0515606  | 0,181359   | no  |
| AN2151 | ChrVII_A_nidulans_FGSC_A4:3039758-3041714 | WT_5hasex | WT_veg | OK     | 9,54207  | 13,9745 | 0,550424     | -0,96413     | 0,334981   | 0,611212   | no  |
| AN2152 | ChrVII_A_nidulans_FGSC_A4:3044685-3045292 | WT_5hasex | WT_veg | OK     | 3,23965  | 3,43271 | 0,0835103    | -0,0750941   | 0,94014    | 0,977554   | no  |
| AN2153 | ChrVII_A_nidulans_FGSC_A4:3046274-3047303 | WT_5hasex | WT_veg | OK     | 75,4411  | 141,609 | 0,908489     | -1,85423     | 0,0637064  | 0,210754   | no  |
| AN2154 | ChrVII_A_nidulans_FGSC_A4:3049390-3052744 | WT_5hasex | WT_veg | OK     | 229,208  | 310,738 | 0,439044     | -0,756578    | 0,449302   | 0,711761   | no  |
| AN2155 | ChrVII_A_nidulans_FGSC_A4:3054427-3055502 | WT_5hasex | WT_veg | OK     | 54,2384  | 70,5767 | 0,379879     | -0,769148    | 0,441806   | 0,705819   | no  |
| AN2156 | ChrVII_A_nidulans_FGSC_A4:3056862-3057803 | WT_5hasex | WT_veg | NOTEST | 0        | 1,37098 | 1.79769e+308 | 1.79769e+308 | 0,134707   | 1          | no  |
| AN2157 | ChrVII_A_nidulans_FGSC_A4:3058687-3060403 | WT_5hasex | WT_veg | OK     | 63,0294  | 327,959 | 2,37942      | -4,06194     | 4,8667E-05 | 0,00058479 | yes |
| AN2158 | ChrVII_A_nidulans_FGSC_A4:3060847-3062261 | WT_5hasex | WT_veg | OK     | 3,97745  | 11,0862 | 1,47885      | -1,91468     | 0,0555328  | 0,191223   | no  |
| AN2160 | ChrVII_A_nidulans_FGSC_A4:3068723-3069978 | WT_5hasex | WT_veg | OK     | 10,442   | 12,2919 | 0,235299     | -0,375501    | 0,707288   | 0,873619   | no  |
| AN2161 | ChrVII_A_nidulans_FGSC_A4:3070259-3071507 | WT_5hasex | WT_veg | OK     | 29,5701  | 67,7146 | 1,19533      | -2,30174     | 0,0213496  | 0,093682   | no  |
| AN2162 | ChrVII_A_nidulans_FGSC_A4:3072888-3075113 | WT_5hasex | WT_veg | OK     | 17,6649  | 16,8867 | -0,0649975   | 0,127386     | 0,898635   | 0,961087   | no  |
| AN2164 | ChrVII_A_nidulans_FGSC_A4:3079491-3082664 | WT_5hasex | WT_veg | OK     | 34,1535  | 37,4197 | 0,131761     | -0,268605    | 0,788234   | 0,913606   | no  |
| AN2165 | ChrVII_A_nidulans_FGSC_A4:3083431-3084602 | WT_5hasex | WT_veg | OK     | 45,4638  | 51,8404 | 0,18936      | -0,379394    | 0,704395   | 0,871958   | no  |
| AN2166 | ChrVII_A_nidulans_FGSC_A4:3084700-3085806 | WT_5hasex | WT_veg | OK     | 24,5078  | 54,7743 | 1,16026      | -2,15929     | 0,030828   | 0,12396    | no  |

## Supplementary table 1

|        |                                           |           |        |        |          |          |              |              |            |            |     |
|--------|-------------------------------------------|-----------|--------|--------|----------|----------|--------------|--------------|------------|------------|-----|
| AN2168 | ChrVII_A_nidulans_FGSC_A4:3089377-3090794 | WT_5hasex | WT_veg | OK     | 21,7926  | 22,1227  | 0,0216888    | -0,0394319   | 0,968546   | 0,988523   | no  |
| AN2169 | ChrVII_A_nidulans_FGSC_A4:3091428-3092444 | WT_5hasex | WT_veg | OK     | 128,719  | 259,342  | 1,01063      | -2,09398     | 0,0362615  | 0,140411   | no  |
| AN2171 | ChrVII_A_nidulans_FGSC_A4:3094955-3095909 | WT_5hasex | WT_veg | OK     | 404,813  | 676,236  | 0,740271     | -1,48546     | 0,137423   | 0,358218   | no  |
| AN2172 | ChrVII_A_nidulans_FGSC_A4:3098404-3099408 | WT_5hasex | WT_veg | OK     | 30,5244  | 32,4497  | 0,0882428    | -0,164072    | 0,869675   | 0,950104   | no  |
| AN2173 | ChrVII_A_nidulans_FGSC_A4:3099802-3102324 | WT_5hasex | WT_veg | OK     | 36,893   | 105,351  | 1,51378      | -3,14776     | 0,00164527 | 0,0118672  | yes |
| AN2175 | ChrVII_A_nidulans_FGSC_A4:3109582-3111393 | WT_5hasex | WT_veg | NOTEST | 0,634384 | 0,413301 | -0,618162    | 0,394305     | 0,693356   | 1          | no  |
| AN2177 | ChrVII_A_nidulans_FGSC_A4:3115692-3117166 | WT_5hasex | WT_veg | OK     | 32,4465  | 131,852  | 2,02278      | -3,46019     | 0,00053979 | 0,00464319 | yes |
| AN2181 | ChrVII_A_nidulans_FGSC_A4:3129583-3130233 | WT_5hasex | WT_veg | OK     | 181,757  | 489,937  | 1,43058      | -2,90519     | 0,00367027 | 0,0231444  | yes |
| AN2182 | ChrVII_A_nidulans_FGSC_A4:3130548-3132534 | WT_5hasex | WT_veg | OK     | 4,33214  | 10,1337  | 1,22601      | -1,61541     | 0,106222   | 0,302217   | no  |
| AN2183 | ChrVII_A_nidulans_FGSC_A4:3134615-3135653 | WT_5hasex | WT_veg | OK     | 47,8572  | 31,6474  | -0,596649    | 1,18738      | 0,235076   | 0,500263   | no  |
| AN2184 | ChrVII_A_nidulans_FGSC_A4:3136325-3137610 | WT_5hasex | WT_veg | OK     | 14,5836  | 35,9179  | 1,30035      | -2,27255     | 0,0230535  | 0,0991545  | no  |
| AN2186 | ChrVII_A_nidulans_FGSC_A4:3139774-3141541 | WT_5hasex | WT_veg | OK     | 3,34423  | 9,14142  | 1,45075      | -1,98533     | 0,0471074  | 0,170325   | no  |
| AN2187 | ChrVII_A_nidulans_FGSC_A4:3141674-3142494 | WT_5hasex | WT_veg | OK     | 1,18287  | 7,88179  | 2,73624      | -2,95571     | 0,00311955 | 0,020204   | yes |
| AN2188 | ChrVII_A_nidulans_FGSC_A4:3143069-3144276 | WT_5hasex | WT_veg | OK     | 16,5462  | 23,6454  | 0,515058     | -0,895613    | 0,370459   | 0,645158   | no  |
| AN2189 | ChrVII_A_nidulans_FGSC_A4:3144675-3145479 | WT_5hasex | WT_veg | OK     | 25,2386  | 62,0049  | 1,29675      | -2,31271     | 0,0207386  | 0,091662   | no  |
| AN2190 | ChrVII_A_nidulans_FGSC_A4:3146063-3147164 | WT_5hasex | WT_veg | OK     | 17,644   | 49,8077  | 1,4972       | -2,65049     | 0,00803741 | 0,0437677  | yes |
| AN2192 | ChrVII_A_nidulans_FGSC_A4:3154110-3155581 | WT_5hasex | WT_veg | NOTEST | 0        | 1,31046  | 1.79769e+308 | 1.79769e+308 | 0,036343   | 1          | no  |
| AN2193 | ChrVII_A_nidulans_FGSC_A4:3156221-3156756 | WT_5hasex | WT_veg | OK     | 99,732   | 112      | 0,167364     | -0,318798    | 0,749879   | 0,89578    | no  |
| AN2194 | ChrVII_A_nidulans_FGSC_A4:3160475-3165486 | WT_5hasex | WT_veg | OK     | 1,68844  | 7,82737  | 2,21284      | -3,03856     | 0,00237713 | 0,0161251  | yes |
| AN2195 | ChrVII_A_nidulans_FGSC_A4:3166177-3172104 | WT_5hasex | WT_veg | NOTEST | 0,799233 | 1,80166  | 1,17264      | -1,39423     | 0,163248   | 1          | no  |
| AN2196 | ChrVII_A_nidulans_FGSC_A4:3174144-3176061 | WT_5hasex | WT_veg | NOTEST | 0,277707 | 1,47303  | 2,40715      | -1,7719      | 0,0764117  | 1          | no  |
| AN2197 | ChrVII_A_nidulans_FGSC_A4:3176685-3178128 | WT_5hasex | WT_veg | OK     | 6,27829  | 0,119138 | -5,71966     | 1,92879      | 0,0537565  | 0,186788   | no  |
| AN2198 | ChrVII_A_nidulans_FGSC_A4:3179346-3180956 | WT_5hasex | WT_veg | NOTEST | 1,71588  | 2,0119   | 0,229605     | -0,214721    | 0,829985   | 1          | no  |
| AN2199 | ChrVII_A_nidulans_FGSC_A4:3181310-3182630 | WT_5hasex | WT_veg | OK     | 1,66742  | 11,2528  | 2,7546       | -3,0393      | 0,0023713  | 0,0160918  | yes |
| AN2200 | ChrVII_A_nidulans_FGSC_A4:3185769-3187061 | WT_5hasex | WT_veg | NOTEST | 1,02397  | 3,36357  | 1,71582      | -1,77594     | 0,0757421  | 1          | no  |
| AN2201 | ChrVII_A_nidulans_FGSC_A4:3188381-3190072 | WT_5hasex | WT_veg | OK     | 4,65566  | 6,31225  | 0,43917      | -0,526577    | 0,598488   | 0,812289   | no  |
| AN2202 | ChrVII_A_nidulans_FGSC_A4:3191300-3191911 | WT_5hasex | WT_veg | NOTEST | 0        | 0        | 0            | 0            | 1          | 1          | no  |
| AN2203 | ChrVII_A_nidulans_FGSC_A4:3192851-3193561 | WT_5hasex | WT_veg | OK     | 1,3078   | 5,24185  | 2,00293      | -1,38557     | 0,165878   | 0,40442    | no  |
| AN2204 | ChrVII_A_nidulans_FGSC_A4:3194047-3195052 | WT_5hasex | WT_veg | OK     | 2,88409  | 8,53452  | 1,5652       | -1,97336     | 0,048454   | 0,173755   | no  |
| AN2205 | ChrVII_A_nidulans_FGSC_A4:3198153-3199030 | WT_5hasex | WT_veg | OK     | 21,6548  | 92,8852  | 2,10077      | -3,53082     | 0,00041427 | 0,00370468 | yes |
| AN2207 | ChrVII_A_nidulans_FGSC_A4:3205096-3206040 | WT_5hasex | WT_veg | OK     | 26,9068  | 61,2208  | 1,18605      | -1,96394     | 0,0495373  | 0,176445   | no  |
| AN2208 | ChrVII_A_nidulans_FGSC_A4:3206281-3207658 | WT_5hasex | WT_veg | OK     | 87,3574  | 982,121  | 3,4909       | -6,92159     | 4,4662E-12 | 2,2612E-10 | yes |
| AN2209 | ChrVII_A_nidulans_FGSC_A4:3208127-3209707 | WT_5hasex | WT_veg | OK     | 23,0735  | 29,2617  | 0,342774     | -0,653115    | 0,513682   | 0,758419   | no  |
| AN2210 | ChrVII_A_nidulans_FGSC_A4:3210013-3212504 | WT_5hasex | WT_veg | OK     | 96,3391  | 509,573  | 2,40309      | -4,79167     | 1,654E-06  | 2,8959E-05 | yes |
| AN2211 | ChrVII_A_nidulans_FGSC_A4:3212884-3214250 | WT_5hasex | WT_veg | OK     | 11,4185  | 14,9524  | 0,389006     | -0,650352    | 0,515465   | 0,760006   | no  |
| AN2212 | ChrVII_A_nidulans_FGSC_A4:3214544-3215988 | WT_5hasex | WT_veg | OK     | 111,015  | 240,049  | 1,11258      | -2,22771     | 0,0259     | 0,108464   | no  |
| AN2213 | ChrVII_A_nidulans_FGSC_A4:3216467-3218145 | WT_5hasex | WT_veg | OK     | 176,826  | 302,013  | 0,772283     | -1,5572      | 0,119423   | 0,326654   | no  |
| AN2214 | ChrVII_A_nidulans_FGSC_A4:3218690-3220481 | WT_5hasex | WT_veg | OK     | 16,7628  | 17,021   | 0,022048     | -0,0418375   | 0,966628   | 0,98772    | no  |
| AN2215 | ChrVII_A_nidulans_FGSC_A4:3222416-3226288 | WT_5hasex | WT_veg | OK     | 33,877   | 49,0222  | 0,53313      | -1,08355     | 0,278564   | 0,551821   | no  |
| AN2216 | ChrVII_A_nidulans_FGSC_A4:3226990-3228809 | WT_5hasex | WT_veg | OK     | 32,9704  | 74,0068  | 1,16649      | -2,22879     | 0,025828   | 0,108223   | no  |
| AN2218 | ChrVII_A_nidulans_FGSC_A4:3232767-3235128 | WT_5hasex | WT_veg | OK     | 50,5179  | 79,4136  | 0,652592     | -1,32884     | 0,183901   | 0,432006   | no  |
| AN2219 | ChrVII_A_nidulans_FGSC_A4:3236436-3238514 | WT_5hasex | WT_veg | OK     | 56,1023  | 190,493  | 1,7636       | -3,31971     | 0,00090112 | 0,00719933 | yes |
| AN2220 | ChrVII_A_nidulans_FGSC_A4:3239171-3239936 | WT_5hasex | WT_veg | OK     | 4,3914   | 27,6508  | 2,65457      | -3,47179     | 0,000517   | 0,00447875 | yes |
| AN2221 | ChrVII_A_nidulans_FGSC_A4:3240377-3241100 | WT_5hasex | WT_veg | OK     | 1,94718  | 23,9843  | 3,62263      | -4,28374     | 1,8378E-05 | 0,0002484  | yes |
| AN2222 | ChrVII_A_nidulans_FGSC_A4:3243890-3245386 | WT_5hasex | WT_veg | OK     | 44,6531  | 95,2554  | 1,09304      | -2,18059     | 0,0292138  | 0,118856   | no  |
| AN2223 | ChrVII_A_nidulans_FGSC_A4:3245809-3248607 | WT_5hasex | WT_veg | OK     | 13,0351  | 12,0009  | -0,119264    | 0,231833     | 0,816668   | 0,926647   | no  |
| AN2225 | ChrVII_A_nidulans_FGSC_A4:3251697-3252945 | WT_5hasex | WT_veg | OK     | 216,555  | 512,042  | 1,24153      | -2,51009     | 0,01207    | 0,0604389  | no  |
| AN2226 | ChrVII_A_nidulans_FGSC_A4:3253350-3260691 | WT_5hasex | WT_veg | OK     | 11,2056  | 21,8     | 0,960107     | -2,501408    | 0,0440009  | 0,161772   | no  |
| AN2228 | ChrVII_A_nidulans_FGSC_A4:3264627-3265964 | WT_5hasex | WT_veg | OK     | 31,9881  | 13,3409  | -1,26168     | 2,12849      | 0,0332968  | 0,131516   | no  |
| AN2230 | ChrVII_A_nidulans_FGSC_A4:3269390-3270953 | WT_5hasex | WT_veg | OK     | 9,10674  | 16,6012  | 0,866278     | -1,28115     | 0,20014    | 0,454645   | no  |
| AN2231 | ChrVII_A_nidulans_FGSC_A4:3272170-3274045 | WT_5hasex | WT_veg | OK     | 15,1312  | 16,8495  | 0,155178     | -0,294121    | 0,768665   | 0,905112   | no  |
| AN2232 | ChrVII_A_nidulans_FGSC_A4:3274861-3276894 | WT_5hasex | WT_veg | OK     | 39,5283  | 77,9242  | 0,979185     | -2,01933     | 0,0434528  | 0,160349   | no  |
| AN2234 | ChrVII_A_nidulans_FGSC_A4:3279098-3281039 | WT_5hasex | WT_veg | OK     | 19,442   | 10,5337  | -0,884164    | 1,68287      | 0,0923998  | 0,27402    | no  |

## Supplementary table 1

|        |                                           |           |        |        |          |          |           |           |            |            |     |
|--------|-------------------------------------------|-----------|--------|--------|----------|----------|-----------|-----------|------------|------------|-----|
| AN2235 | ChrVII_A_nidulans_FGSC_A4:3281264-3282207 | WT_5hasex | WT_veg | OK     | 21,4659  | 59,2142  | 1,4639    | -2,52787  | 0,0114757  | 0,0581016  | no  |
| AN2236 | ChrVII_A_nidulans_FGSC_A4:3285758-3287709 | WT_5hasex | WT_veg | OK     | 23,6761  | 59,6219  | 1,33241   | -2,66809  | 0,00762838 | 0,0419677  | yes |
| AN2237 | ChrVII_A_nidulans_FGSC_A4:3288498-3290539 | WT_5hasex | WT_veg | OK     | 86,3059  | 65,4465  | -0,399144 | 0,678488  | 0,497463   | 0,747985   | no  |
| AN2238 | ChrVII_A_nidulans_FGSC_A4:3291017-3292741 | WT_5hasex | WT_veg | OK     | 359,954  | 789,204  | 1,13259   | -2,01738  | 0,0436563  | 0,160832   | no  |
| AN2240 | ChrVII_A_nidulans_FGSC_A4:3296942-3298930 | WT_5hasex | WT_veg | OK     | 20,6276  | 18,8448  | -0,130407 | 0,244521  | 0,806828   | 0,922518   | no  |
| AN2241 | ChrVII_A_nidulans_FGSC_A4:3299043-3300795 | WT_5hasex | WT_veg | OK     | 2,1283   | 6,29711  | 1,56499   | -2,11002  | 0,0348568  | 0,136199   | no  |
| AN2242 | ChrVII_A_nidulans_FGSC_A4:3301049-3301887 | WT_5hasex | WT_veg | OK     | 12,5869  | 26,8678  | 1,09395   | -1,65615  | 0,0976916  | 0,284576   | no  |
| AN2244 | ChrVII_A_nidulans_FGSC_A4:3304553-3306322 | WT_5hasex | WT_veg | OK     | 57,0982  | 159,408  | 1,4812    | -3,05614  | 0,00224205 | 0,0153664  | yes |
| AN2245 | ChrVII_A_nidulans_FGSC_A4:3306476-3307859 | WT_5hasex | WT_veg | OK     | 41,1471  | 134,166  | 1,70516   | -3,49312  | 0,0004774  | 0,00418622 | yes |
| AN2246 | ChrVII_A_nidulans_FGSC_A4:3308033-3313144 | WT_5hasex | WT_veg | OK     | 32,1754  | 22,2627  | -0,531332 | 1,05124   | 0,293149   | 0,568044   | no  |
| AN2247 | ChrVII_A_nidulans_FGSC_A4:3313516-3315873 | WT_5hasex | WT_veg | OK     | 30,2024  | 46,5578  | 0,62436   | -1,28769  | 0,197853   | 0,451608   | no  |
| AN2249 | ChrVII_A_nidulans_FGSC_A4:3324238-3326021 | WT_5hasex | WT_veg | OK     | 68,5681  | 160,943  | 1,23094   | -2,31255  | 0,0207473  | 0,0916774  | no  |
| AN2250 | ChrVII_A_nidulans_FGSC_A4:3328419-3329408 | WT_5hasex | WT_veg | OK     | 1,07032  | 5,05115  | 2,23857   | -2,09713  | 0,0359818  | 0,139565   | no  |
| AN2252 | ChrVII_A_nidulans_FGSC_A4:3334068-3334827 | WT_5hasex | WT_veg | OK     | 7,01567  | 25,3531  | 1,85351   | -2,60868  | 0,0090892  | 0,0482957  | yes |
| AN2253 | ChrVII_A_nidulans_FGSC_A4:3334957-3335517 | WT_5hasex | WT_veg | OK     | 3,81785  | 13,6232  | 1,83524   | -2,19008  | 0,0285184  | 0,116551   | no  |
| AN2254 | ChrVII_A_nidulans_FGSC_A4:3336358-3338340 | WT_5hasex | WT_veg | NOTEST | 0,689743 | 0,171324 | -2,00933  | 0,660281  | 0,509074   | 1          | no  |
| AN2255 | ChrVII_A_nidulans_FGSC_A4:3343575-3349312 | WT_5hasex | WT_veg | OK     | 4,38782  | 8,65761  | 0,980466  | -1,80213  | 0,0715244  | 0,228929   | no  |
| AN2256 | ChrVII_A_nidulans_FGSC_A4:3349772-3352636 | WT_5hasex | WT_veg | OK     | 4,35578  | 31,9929  | 2,87675   | -4,77919  | 1,76E-06   | 3,06E-05   | yes |
| AN2257 | ChrVII_A_nidulans_FGSC_A4:3353105-3354978 | WT_5hasex | WT_veg | OK     | 34,5236  | 117,055  | 1,76153   | -3,4344   | 0,00059387 | 0,00504374 | yes |
| AN2258 | ChrVII_A_nidulans_FGSC_A4:3355119-3357744 | WT_5hasex | WT_veg | OK     | 5,38859  | 17,8343  | 1,72668   | -2,92014  | 0,00349871 | 0,0222607  | yes |
| AN2259 | ChrVII_A_nidulans_FGSC_A4:3358155-3361857 | WT_5hasex | WT_veg | OK     | 17,2651  | 24,7016  | 0,516749  | -1,02104  | 0,307233   | 0,583231   | no  |
| AN2260 | ChrVII_A_nidulans_FGSC_A4:3362036-3362986 | WT_5hasex | WT_veg | OK     | 261,021  | 388,397  | 0,573366  | -1,18612  | 0,235576   | 0,500898   | no  |
| AN2261 | ChrVII_A_nidulans_FGSC_A4:3363227-3364948 | WT_5hasex | WT_veg | OK     | 16,6291  | 55,6319  | 1,7422    | -3,24219  | 0,00118616 | 0,0090397  | yes |
| AN2262 | ChrVII_A_nidulans_FGSC_A4:3365098-3366836 | WT_5hasex | WT_veg | OK     | 19,8282  | 109,563  | 2,46613   | -4,73494  | 2,1913E-06 | 3,7209E-05 | yes |
| AN2263 | ChrVII_A_nidulans_FGSC_A4:3367219-3369371 | WT_5hasex | WT_veg | OK     | 16,982   | 130,053  | 2,93702   | -5,75033  | 8,9067E-09 | 2,6074E-07 | yes |
| AN2265 | ChrVII_A_nidulans_FGSC_A4:3376029-3378061 | WT_5hasex | WT_veg | OK     | 236,324  | 411,868  | 0,801414  | -1,52482  | 0,127304   | 0,340396   | no  |
| AN2267 | ChrVII_A_nidulans_FGSC_A4:3386721-3389233 | WT_5hasex | WT_veg | OK     | 44,1679  | 77,6133  | 0,813306  | -1,70163  | 0,0888257  | 0,266756   | no  |
| AN2268 | ChrVII_A_nidulans_FGSC_A4:3389847-3391367 | WT_5hasex | WT_veg | OK     | 76,3845  | 179,045  | 1,22897   | -2,49752  | 0,0125065  | 0,0621494  | no  |
| AN2271 | ChrVII_A_nidulans_FGSC_A4:3401575-3404692 | WT_5hasex | WT_veg | OK     | 20,2347  | 34,7687  | 0,780958  | -1,57793  | 0,114581   | 0,317553   | no  |
| AN2272 | ChrVII_A_nidulans_FGSC_A4:3405303-3407198 | WT_5hasex | WT_veg | OK     | 319,113  | 283,602  | -0,1702   | 0,327241  | 0,743485   | 0,892148   | no  |
| AN2273 | ChrVII_A_nidulans_FGSC_A4:3407403-3408178 | WT_5hasex | WT_veg | OK     | 88,4205  | 125,195  | 0,501729  | -1,00482  | 0,314984   | 0,591161   | no  |
| AN2274 | ChrVII_A_nidulans_FGSC_A4:3408650-3410677 | WT_5hasex | WT_veg | OK     | 19,0057  | 45,5984  | 1,26255   | -2,43372  | 0,0149447  | 0,0713058  | no  |
| AN2275 | ChrVII_A_nidulans_FGSC_A4:3411846-3413164 | WT_5hasex | WT_veg | OK     | 1122,55  | 1758,88  | 0,647876  | -1,08511  | 0,277875   | 0,551227   | no  |
| AN2276 | ChrVII_A_nidulans_FGSC_A4:3413766-3414447 | WT_5hasex | WT_veg | OK     | 14,143   | 29,7998  | 1,07522   | -1,67846  | 0,0932568  | 0,275719   | no  |
| AN2277 | ChrVII_A_nidulans_FGSC_A4:3415953-3417693 | WT_5hasex | WT_veg | OK     | 227,659  | 493,413  | 1,11592   | -2,17666  | 0,0295062  | 0,119804   | no  |
| AN2278 | ChrVII_A_nidulans_FGSC_A4:3418614-3423392 | WT_5hasex | WT_veg | OK     | 39,6804  | 108,599  | 1,45251   | -2,94326  | 0,00324777 | 0,0208771  | yes |
| AN2279 | ChrVII_A_nidulans_FGSC_A4:3423735-3425186 | WT_5hasex | WT_veg | OK     | 936,631  | 2486,69  | 1,40868   | -2,49171  | 0,0127129  | 0,0629541  | no  |
| AN2280 | ChrVII_A_nidulans_FGSC_A4:3425425-3426162 | WT_5hasex | WT_veg | OK     | 19,6869  | 24,285   | 0,302833  | -0,459127 | 0,646143   | 0,839402   | no  |
| AN2282 | ChrVII_A_nidulans_FGSC_A4:3429998-3432203 | WT_5hasex | WT_veg | OK     | 21,2522  | 29,7103  | 0,483353  | -0,926796 | 0,354033   | 0,629629   | no  |
| AN2283 | ChrVII_A_nidulans_FGSC_A4:3433293-3434931 | WT_5hasex | WT_veg | OK     | 30,1867  | 247,684  | 3,03651   | -6,04261  | 1,5165E-09 | 5,1534E-08 | yes |
| AN2285 | ChrVII_A_nidulans_FGSC_A4:3438340-3443541 | WT_5hasex | WT_veg | OK     | 20,6158  | 50,8713  | 1,3031    | -2,71419  | 0,00664379 | 0,0375564  | yes |
| AN2287 | ChrVII_A_nidulans_FGSC_A4:3447439-3449806 | WT_5hasex | WT_veg | OK     | 451,783  | 167,969  | -1,42744  | 2,66181   | 0,00777225 | 0,0425893  | yes |
| AN2288 | ChrVII_A_nidulans_FGSC_A4:3450169-3452841 | WT_5hasex | WT_veg | OK     | 41,5215  | 58,6926  | 0,49932   | -1,00915  | 0,312904   | 0,589      | no  |
| AN2289 | ChrVII_A_nidulans_FGSC_A4:3453438-3455537 | WT_5hasex | WT_veg | OK     | 35,9901  | 42,0637  | 0,224974  | -0,460298 | 0,645302   | 0,838814   | no  |
| AN2291 | ChrVII_A_nidulans_FGSC_A4:3463117-3464585 | WT_5hasex | WT_veg | OK     | 10,2698  | 20,934   | 1,02744   | -1,68436  | 0,0921128  | 0,27337    | no  |
| AN2292 | ChrVII_A_nidulans_FGSC_A4:3466872-3467835 | WT_5hasex | WT_veg | OK     | 20,5223  | 64,2973  | 1,64757   | -2,82835  | 0,00467883 | 0,0282093  | yes |
| AN2293 | ChrVII_A_nidulans_FGSC_A4:3468061-3469063 | WT_5hasex | WT_veg | OK     | 58,3078  | 107,95   | 0,888608  | -1,76461  | 0,0776297  | 0,242758   | no  |
| AN2294 | ChrVII_A_nidulans_FGSC_A4:3470786-3472636 | WT_5hasex | WT_veg | OK     | 15,3354  | 78,8378  | 2,36203   | -4,45451  | 8,4087E-06 | 0,00012322 | yes |
| AN2295 | ChrVII_A_nidulans_FGSC_A4:3472842-3474573 | WT_5hasex | WT_veg | OK     | 245,912  | 341,809  | 0,475047  | -0,943949 | 0,345196   | 0,620537   | no  |
| AN2296 | ChrVII_A_nidulans_FGSC_A4:3475075-3478037 | WT_5hasex | WT_veg | OK     | 13,7738  | 24,8323  | 0,850292  | -1,67082  | 0,0947574  | 0,278763   | no  |
| AN2297 | ChrVII_A_nidulans_FGSC_A4:3478837-3480293 | WT_5hasex | WT_veg | OK     | 29,164   | 53,3827  | 0,872183  | -1,71526  | 0,0862979  | 0,261675   | no  |
| AN2298 | ChrVII_A_nidulans_FGSC_A4:3480765-3482983 | WT_5hasex | WT_veg | OK     | 39,7909  | 50,8878  | 0,354879  | -0,713388 | 0,475606   | 0,731925   | no  |
| AN2299 | ChrVII_A_nidulans_FGSC_A4:3483548-3485353 | WT_5hasex | WT_veg | OK     | 106,881  | 164,43   | 0,62147   | -1,25432  | 0,209726   | 0,46772    | no  |

# Supplementary table 1

|        |                                           |           |        |        |          |          |               |               |            |            |     |
|--------|-------------------------------------------|-----------|--------|--------|----------|----------|---------------|---------------|------------|------------|-----|
| AN2301 | ChrVII_A_nidulans_FGSC_A4:3493493-3494689 | WT_5hasex | WT_veg | OK     | 1870,77  | 2795,34  | 0,579391      | -0,950464     | 0,341877   | 0,61744    | no  |
| AN2303 | ChrVII_A_nidulans_FGSC_A4:3497097-3499004 | WT_5hasex | WT_veg | OK     | 39,3647  | 83,1881  | 1,07947       | -2,15294      | 0,0313232  | 0,125528   | no  |
| AN2304 | ChrVII_A_nidulans_FGSC_A4:3499748-3501437 | WT_5hasex | WT_veg | OK     | 177,669  | 279,328  | 0,652768      | -1,33106      | 0,183168   | 0,430884   | no  |
| AN2305 | ChrVII_A_nidulans_FGSC_A4:3503200-3504412 | WT_5hasex | WT_veg | OK     | 22,2121  | 31,127   | 0,486821      | -0,829454     | 0,406847   | 0,677114   | no  |
| AN2306 | ChrVII_A_nidulans_FGSC_A4:3506054-3507448 | WT_5hasex | WT_veg | OK     | 392,284  | 488,278  | 0,315803      | -0,589517     | 0,555514   | 0,785654   | no  |
| AN2307 | ChrVII_A_nidulans_FGSC_A4:3507835-3508304 | WT_5hasex | WT_veg | OK     | 58,3938  | 85,9468  | 0,557629      | -1,02649      | 0,30466    | 0,580664   | no  |
| AN2308 | ChrVII_A_nidulans_FGSC_A4:3509014-3511908 | WT_5hasex | WT_veg | OK     | 22,0405  | 20,4492  | -0,108108     | 0,216838      | 0,828335   | 0,931648   | no  |
| AN2309 | ChrVII_A_nidulans_FGSC_A4:3511977-3512569 | WT_5hasex | WT_veg | OK     | 14,0202  | 38,9337  | 1,47352       | -2,16594      | 0,0303154  | 0,122274   | no  |
| AN2311 | ChrVII_A_nidulans_FGSC_A4:3519999-3522151 | WT_5hasex | WT_veg | OK     | 118,157  | 452,639  | 1,93766       | -3,94767      | 7,8916E-05 | 0,00089201 | yes |
| AN2312 | ChrVII_A_nidulans_FGSC_A4:3523544-3524172 | WT_5hasex | WT_veg | OK     | 120,859  | 584,793  | 2,27461       | -4,55295      | 5,2898E-06 | 8,1456E-05 | yes |
| AN2313 | ChrVII_A_nidulans_FGSC_A4:3524601-3526076 | WT_5hasex | WT_veg | OK     | 50,4257  | 146,979  | 1,54338       | -3,19286      | 0,00140873 | 0,0104193  | yes |
| AN2314 | ChrVII_A_nidulans_FGSC_A4:3528856-3531636 | WT_5hasex | WT_veg | OK     | 224,385  | 1140,06  | 2,34506       | -3,86119      | 0,00011284 | 0,00121963 | yes |
| AN2315 | ChrVII_A_nidulans_FGSC_A4:3531860-3534272 | WT_5hasex | WT_veg | OK     | 1066,08  | 1812,19  | 0,765421      | -1,20295      | 0,228996   | 0,492099   | no  |
| AN2316 | ChrVII_A_nidulans_FGSC_A4:3535097-3536285 | WT_5hasex | WT_veg | OK     | 784,452  | 1012,84  | 0,368645      | -0,657412     | 0,510916   | 0,756658   | no  |
| AN2317 | ChrVII_A_nidulans_FGSC_A4:3536571-3537857 | WT_5hasex | WT_veg | OK     | 660,383  | 1103,07  | 0,740155      | -1,37277      | 0,169823   | 0,41055    | no  |
| AN2318 | ChrVII_A_nidulans_FGSC_A4:3538750-3540820 | WT_5hasex | WT_veg | OK     | 32,6276  | 41,0985  | 0,332993      | -0,656087     | 0,511768   | 0,757198   | no  |
| AN2319 | ChrVII_A_nidulans_FGSC_A4:3544294-3546460 | WT_5hasex | WT_veg | OK     | 347,535  | 43,8455  | -2,98666      | 4,87267       | 1,101E-06  | 1,9984E-05 | yes |
| AN2320 | ChrVII_A_nidulans_FGSC_A4:3547626-3549244 | WT_5hasex | WT_veg | OK     | 4,60297  | 8,30236  | 0,850954      | -1,23223      | 0,217862   | 0,478415   | no  |
| AN2321 | ChrVII_A_nidulans_FGSC_A4:3549721-3551345 | WT_5hasex | WT_veg | NOTEST | 1,18607  | 1,87584  | 0,661351      | -0,699857     | 0,484017   | 1          | no  |
| AN2322 | ChrVII_A_nidulans_FGSC_A4:3553699-3554949 | WT_5hasex | WT_veg | NOTEST | 0,8535   | 3,09396  | 1,85799       | -1,82733      | 0,0676507  | 1          | no  |
| AN2323 | ChrVII_A_nidulans_FGSC_A4:3557778-3558201 | WT_5hasex | WT_veg | OK     | 2,96665  | 4,814    | 0,698403      | -0,612248     | 0,540374   | 0,775884   | no  |
| AN2324 | ChrVII_A_nidulans_FGSC_A4:3558762-3561714 | WT_5hasex | WT_veg | OK     | 2,20716  | 5,55275  | 1,33101       | -1,8335       | 0,0667287  | 0,217891   | no  |
| AN2325 | ChrVII_A_nidulans_FGSC_A4:3561793-3564352 | WT_5hasex | WT_veg | OK     | 10,6509  | 3,8582   | -1,46498      | 2,48735       | 0,0128697  | 0,0635745  | no  |
| AN2326 | ChrVII_A_nidulans_FGSC_A4:3565747-3568841 | WT_5hasex | WT_veg | OK     | 8,62522  | 34,4849  | 1,99933       | -3,16996      | 0,0015246  | 0,0111379  | yes |
| AN2328 | ChrVII_A_nidulans_FGSC_A4:3573349-3574069 | WT_5hasex | WT_veg | OK     | 16,6624  | 28,1912  | 0,758651      | -1,20891      | 0,226698   | 0,489551   | no  |
| AN2331 | ChrVII_A_nidulans_FGSC_A4:3582340-3583751 | WT_5hasex | WT_veg | OK     | 7,10548  | 22,3574  | 1,65375       | -2,55912      | 0,0104937  | 0,0541122  | no  |
| AN2332 | ChrVII_A_nidulans_FGSC_A4:3585628-3586918 | WT_5hasex | WT_veg | OK     | 216,514  | 616,045  | 1,50858       | -2,9826       | 0,00285814 | 0,0187591  | yes |
| AN2333 | ChrVII_A_nidulans_FGSC_A4:3587255-3588454 | WT_5hasex | WT_veg | OK     | 27,6058  | 20,3155  | -0,442389     | 0,759052      | 0,447822   | 0,710721   | no  |
| AN2334 | ChrVII_A_nidulans_FGSC_A4:3592476-3593441 | WT_5hasex | WT_veg | OK     | 7,2558   | 17,7146  | 1,28773       | -1,79824      | 0,0721387  | 0,230402   | no  |
| AN2335 | ChrVII_A_nidulans_FGSC_A4:3594077-3595555 | WT_5hasex | WT_veg | OK     | 3,81716  | 14,9582  | 1,97036       | -2,8322       | 0,00462296 | 0,027935   | yes |
| AN2336 | ChrVII_A_nidulans_FGSC_A4:3596931-3598364 | WT_5hasex | WT_veg | OK     | 175,415  | 23,2292  | -2,91676      | 5,3943        | 6,879E-08  | 1,6619E-06 | yes |
| AN2337 | ChrVII_A_nidulans_FGSC_A4:3602255-3603078 | WT_5hasex | WT_veg | OK     | 378,456  | 919,91   | 1,28137       | -2,55308      | 0,0106775  | 0,0548604  | no  |
| AN2338 | ChrVII_A_nidulans_FGSC_A4:3603271-3604382 | WT_5hasex | WT_veg | OK     | 16,5895  | 26,8851  | 0,696536      | -1,2081       | 0,227007   | 0,489879   | no  |
| AN2339 | ChrVII_A_nidulans_FGSC_A4:3608003-3608897 | WT_5hasex | WT_veg | NOTEST | 0,44754  | 0        | -1.79769e+308 | -1.79769e+308 | 0,23809    | 1          | no  |
| AN2342 | ChrVII_A_nidulans_FGSC_A4:3617557-3618712 | WT_5hasex | WT_veg | NOTEST | 0,865948 | 1,86641  | 1,10791       | -0,955321     | 0,339415   | 1          | no  |
| AN2343 | ChrVII_A_nidulans_FGSC_A4:3618847-3619634 | WT_5hasex | WT_veg | OK     | 349,333  | 663,002  | 0,924409      | -1,57444      | 0,115386   | 0,319007   | no  |
| AN2344 | ChrVII_A_nidulans_FGSC_A4:3622550-3624119 | WT_5hasex | WT_veg | NOTEST | 0,303412 | 0,548264 | 0,853594      | -0,474128     | 0,635408   | 1          | no  |
| AN2346 | ChrVII_A_nidulans_FGSC_A4:3631598-3633347 | WT_5hasex | WT_veg | NOTEST | 0,405414 | 1,02967  | 1,34472       | -1,11316      | 0,265638   | 1          | no  |
| AN2349 | ChrVII_A_nidulans_FGSC_A4:3645278-3649355 | WT_5hasex | WT_veg | OK     | 5,2803   | 4,0269   | -0,390952     | 0,669535      | 0,503154   | 0,75194    | no  |
| AN2351 | ChrVII_A_nidulans_FGSC_A4:3654323-3655385 | WT_5hasex | WT_veg | NOTEST | 1,62991  | 0,174102 | -3,22679      | 1,07576       | 0,282037   | 1          | no  |
| AN2352 | ChrVII_A_nidulans_FGSC_A4:3656318-3656990 | WT_5hasex | WT_veg | OK     | 19,1798  | 22,583   | 0,235645      | -0,37723      | 0,706003   | 0,872793   | no  |
| AN2353 | ChrVII_A_nidulans_FGSC_A4:3657543-3659180 | WT_5hasex | WT_veg | OK     | 4,84154  | 14,7894  | 1,61103       | -2,19903      | 0,0278758  | 0,114568   | no  |
| AN2354 | ChrVII_A_nidulans_FGSC_A4:3660016-3662373 | WT_5hasex | WT_veg | OK     | 5,68522  | 6,49206  | 0,191459      | -0,282207     | 0,777785   | 0,909095   | no  |
| AN2355 | ChrVII_A_nidulans_FGSC_A4:3666522-3667484 | WT_5hasex | WT_veg | NOTEST | 0        | 0        | 0             | 0             | 1          | 1          | no  |
| AN2356 | ChrVII_A_nidulans_FGSC_A4:3669446-3670672 | WT_5hasex | WT_veg | NOTEST | 0,391276 | 0        | -1.79769e+308 | -1.79769e+308 | 0,122325   | 1          | no  |
| AN2358 | ChrVII_A_nidulans_FGSC_A4:3675781-3677565 | WT_5hasex | WT_veg | OK     | 10,1067  | 95,8947  | 3,24613       | -5,08409      | 3,6938E-07 | 7,5493E-06 | yes |
| AN2360 | ChrVII_A_nidulans_FGSC_A4:3681578-3683122 | WT_5hasex | WT_veg | OK     | 29,9654  | 13,7902  | -1,11965      | 2,07621       | 0,0378745  | 0,14485    | no  |
| AN2361 | ChrVII_A_nidulans_FGSC_A4:3683769-3684536 | WT_5hasex | WT_veg | OK     | 9,08288  | 10,7097  | 0,237693      | -0,328352     | 0,742645   | 0,891835   | no  |
| AN2362 | ChrVII_A_nidulans_FGSC_A4:3685009-3686977 | WT_5hasex | WT_veg | OK     | 18,8163  | 37,5986  | 0,998699      | -1,867        | 0,0619017  | 0,206531   | no  |
| AN2363 | ChrVII_A_nidulans_FGSC_A4:3688354-3692271 | WT_5hasex | WT_veg | OK     | 21,5762  | 38,9132  | 0,850821      | -1,7805       | 0,0749944  | 0,236653   | no  |
| AN2364 | ChrVII_A_nidulans_FGSC_A4:3693259-3695573 | WT_5hasex | WT_veg | OK     | 8,33251  | 22,3816  | 1,42549       | -2,51247      | 0,011989   | 0,060131   | no  |
| AN2365 | ChrVII_A_nidulans_FGSC_A4:3696474-3697735 | WT_5hasex | WT_veg | NOTEST | 0        | 0        | 0             | 0             | 1          | 1          | no  |
| AN2366 | ChrVII_A_nidulans_FGSC_A4:3702268-3703084 | WT_5hasex | WT_veg | OK     | 837,374  | 713,272  | -0,23142      | 0,320378      | 0,748682   | 0,894966   | no  |

## Supplementary table 1

|        |                                           |           |        |        |          |          |               |               |            |            |     |
|--------|-------------------------------------------|-----------|--------|--------|----------|----------|---------------|---------------|------------|------------|-----|
| AN2367 | ChrVII_A_nidulans_FGSC_A4:3703225-3705043 | WT_5hasex | WT_veg | OK     | 1,90251  | 15,3164  | 3,00911       | -4,04983      | 5,1255E-05 | 0,00061155 | yes |
| AN2368 | ChrVII_A_nidulans_FGSC_A4:3705605-3707367 | WT_5hasex | WT_veg | NOTEST | 0,561634 | 0,654954 | 0,221762      | -0,155155     | 0,876699   | 1          | no  |
| AN2369 | ChrVII_A_nidulans_FGSC_A4:3708107-3708925 | WT_5hasex | WT_veg | NOTEST | 0        | 0        | 0             | 0             | 1          | 1          | no  |
| AN2370 | ChrVII_A_nidulans_FGSC_A4:3710929-3711838 | WT_5hasex | WT_veg | OK     | 9,5099   | 23,3522  | 1,29605       | -1,95102      | 0,0510551  | 0,180319   | no  |
| AN2371 | ChrVII_A_nidulans_FGSC_A4:3713870-3715039 | WT_5hasex | WT_veg | NOTEST | 1,20798  | 1,19906  | -0,0106918    | 0,00716146    | 0,994286   | 1          | no  |
| AN2372 | ChrVII_A_nidulans_FGSC_A4:3716250-3718934 | WT_5hasex | WT_veg | NOTEST | 0,287071 | 0,603753 | 1,07255       | -0,702861     | 0,482142   | 1          | no  |
| AN2373 | ChrVII_A_nidulans_FGSC_A4:3719050-3720952 | WT_5hasex | WT_veg | OK     | 0,328993 | 6,28984  | 4,2569        | -3,9685       | 7,2325E-05 | 0,00082661 | yes |
| AN2374 | ChrVII_A_nidulans_FGSC_A4:3725186-3726238 | WT_5hasex | WT_veg | OK     | 27,6053  | 27,28    | -0,0171022    | 0,0296549     | 0,976342   | 0,991729   | no  |
| AN2375 | ChrVII_A_nidulans_FGSC_A4:3727085-3729112 | WT_5hasex | WT_veg | OK     | 14,1183  | 15,5084  | 0,135483      | -0,219851     | 0,825987   | 0,930725   | no  |
| AN2376 | ChrVII_A_nidulans_FGSC_A4:3729633-3731432 | WT_5hasex | WT_veg | NOTEST | 0,336471 | 0,484568 | 0,526218      | -0,335654     | 0,737132   | 1          | no  |
| AN2377 | ChrVII_A_nidulans_FGSC_A4:3731831-3734608 | WT_5hasex | WT_veg | NOTEST | 0,254845 | 0,48645  | 0,93267       | -0,679412     | 0,496877   | 1          | no  |
| AN2378 | ChrVII_A_nidulans_FGSC_A4:3735283-3736403 | WT_5hasex | WT_veg | NOTEST | 0        | 0        | 0             | 0             | 1          | 1          | no  |
| AN2379 | ChrVII_A_nidulans_FGSC_A4:3736648-3738677 | WT_5hasex | WT_veg | NOTEST | 0,08753  | 1,22429  | 3,80603       | -2,35775      | 0,018386   | 1          | no  |
| AN2380 | ChrVII_A_nidulans_FGSC_A4:3739007-3739849 | WT_5hasex | WT_veg | NOTEST | 1,09855  | 3,61394  | 1,71798       | -1,41561      | 0,15689    | 1          | no  |
| AN2381 | ChrVII_A_nidulans_FGSC_A4:3740769-3741351 | WT_5hasex | WT_veg | NOTEST | 0        | 0        | 0             | 0             | 1          | 1          | no  |
| AN2382 | ChrVII_A_nidulans_FGSC_A4:3742065-3742641 | WT_5hasex | WT_veg | OK     | 1,92716  | 4,57246  | 1,24649       | -1,13075      | 0,25816    | 0,528077   | no  |
| AN2383 | ChrVII_A_nidulans_FGSC_A4:3744166-3746320 | WT_5hasex | WT_veg | OK     | 4,82306  | 7,24212  | 0,586464      | -0,840778     | 0,400472   | 0,672516   | no  |
| AN2384 | ChrVII_A_nidulans_FGSC_A4:3747452-3749475 | WT_5hasex | WT_veg | OK     | 0,686648 | 7,24194  | 3,39873       | -3,50338      | 0,0004594  | 0,00405071 | yes |
| AN2386 | ChrVII_A_nidulans_FGSC_A4:3760178-3761664 | WT_5hasex | WT_veg | OK     | 23,3202  | 12,3592  | -0,915991     | 1,58846       | 0,112182   | 0,313071   | no  |
| AN2387 | ChrVII_A_nidulans_FGSC_A4:3762207-3763948 | WT_5hasex | WT_veg | OK     | 32,3448  | 22,0269  | -0,554271     | 1,10142       | 0,270715   | 0,542948   | no  |
| AN2388 | ChrVII_A_nidulans_FGSC_A4:3764761-3766203 | WT_5hasex | WT_veg | OK     | 104,402  | 175,222  | 0,747034      | -1,20876      | 0,226756   | 0,489575   | no  |
| AN2389 | ChrVII_A_nidulans_FGSC_A4:3769144-3770492 | WT_5hasex | WT_veg | OK     | 15,1686  | 23,8242  | 0,651335      | -1,08791      | 0,276637   | 0,549811   | no  |
| AN2390 | ChrVII_A_nidulans_FGSC_A4:3772153-3773304 | WT_5hasex | WT_veg | OK     | 18,1996  | 14,3428  | -0,343579     | 0,540661      | 0,588742   | 0,8064     | no  |
| AN2391 | ChrVII_A_nidulans_FGSC_A4:3773544-3777472 | WT_5hasex | WT_veg | OK     | 30,5366  | 47,2744  | 0,630518      | -1,28045      | 0,200385   | 0,455044   | no  |
| AN2392 | ChrVII_A_nidulans_FGSC_A4:3782043-3783654 | WT_5hasex | WT_veg | NOTEST | 0,82695  | 2,15751  | 1,38349       | -1,30275      | 0,19266    | 1          | no  |
| AN2393 | ChrVII_A_nidulans_FGSC_A4:3787333-3788277 | WT_5hasex | WT_veg | OK     | 12,6256  | 20,8634  | 0,724619      | -1,13718      | 0,255463   | 0,524805   | no  |
| AN2394 | ChrVII_A_nidulans_FGSC_A4:3788782-3790152 | WT_5hasex | WT_veg | OK     | 2,41191  | 0        | -1.79769e+308 | -1.79769e+308 | 0,0151365  | 0,0720084  | no  |
| AN2395 | ChrVII_A_nidulans_FGSC_A4:3791716-3794113 | WT_5hasex | WT_veg | OK     | 16,7764  | 11,6365  | -0,52777      | 1,00465       | 0,315064   | 0,591205   | no  |
| AN2396 | ChrVII_A_nidulans_FGSC_A4:3795279-3796412 | WT_5hasex | WT_veg | OK     | 19,8607  | 26,2257  | 0,401062      | -0,70726      | 0,479405   | 0,73462    | no  |
| AN2397 | ChrVII_A_nidulans_FGSC_A4:3796931-3799340 | WT_5hasex | WT_veg | OK     | 5,13981  | 13,0244  | 1,34143       | -2,20105      | 0,0277325  | 0,114105   | no  |
| AN2398 | ChrVII_A_nidulans_FGSC_A4:3799483-3801027 | WT_5hasex | WT_veg | OK     | 4,47918  | 5,48341  | 0,291837      | -0,384226     | 0,700811   | 0,869843   | no  |
| AN2399 | ChrVII_A_nidulans_FGSC_A4:3802222-3802843 | WT_5hasex | WT_veg | NOTEST | 0        | 0        | 0             | 0             | 1          | 1          | no  |
| AN2400 | ChrVII_A_nidulans_FGSC_A4:3803123-3804149 | WT_5hasex | WT_veg | NOTEST | 0        | 0        | 0             | 0             | 1          | 1          | no  |
| AN2402 | ChrVII_A_nidulans_FGSC_A4:3809315-3810204 | WT_5hasex | WT_veg | NOTEST | 0,280514 | 0        | -1.79769e+308 | -1.79769e+308 | 0,224063   | 1          | no  |
| AN2404 | ChrVII_A_nidulans_FGSC_A4:3817953-3819255 | WT_5hasex | WT_veg | OK     | 365,138  | 2327,71  | 2,6724        | -4,88565      | 1,0309E-06 | 1,8839E-05 | yes |
| AN2405 | ChrVII_A_nidulans_FGSC_A4:3821206-3822106 | WT_5hasex | WT_veg | OK     | 68,8814  | 61,9878  | -0,152131     | 0,307327      | 0,758595   | 0,900199   | no  |
| AN2406 | ChrVII_A_nidulans_FGSC_A4:3823214-3824078 | WT_5hasex | WT_veg | OK     | 182,672  | 164,661  | -0,149756     | 0,305427      | 0,760041   | 0,900749   | no  |
| AN2407 | ChrVII_A_nidulans_FGSC_A4:3825982-3828440 | WT_5hasex | WT_veg | OK     | 3,96147  | 4,93129  | 0,315929      | -0,396197     | 0,69196    | 0,864859   | no  |
| AN2408 | ChrVII_A_nidulans_FGSC_A4:3831760-3834097 | WT_5hasex | WT_veg | OK     | 7,79065  | 29,9639  | 1,94341       | -3,41045      | 0,00064855 | 0,00542984 | yes |
| AN2410 | ChrVII_A_nidulans_FGSC_A4:3840423-3842171 | WT_5hasex | WT_veg | OK     | 55,5512  | 153,625  | 1,46752       | -3,06128      | 0,00220395 | 0,0151576  | yes |
| AN2411 | ChrVII_A_nidulans_FGSC_A4:3842448-3844072 | WT_5hasex | WT_veg | NOTEST | 0,568431 | 0,693912 | 0,287767      | -0,186682     | 0,85191    | 1          | no  |
| AN2413 | ChrVII_A_nidulans_FGSC_A4:3850757-3853555 | WT_5hasex | WT_veg | OK     | 33,4515  | 52,3821  | 0,647004      | -1,11753      | 0,26377    | 0,534726   | no  |
| AN2414 | ChrVII_A_nidulans_FGSC_A4:3850757-3853555 | WT_5hasex | WT_veg | OK     | 140,538  | 224,044  | 0,672817      | -1,31539      | 0,188379   | 0,438282   | no  |
| AN2415 | ChrVII_A_nidulans_FGSC_A4:3853854-3855096 | WT_5hasex | WT_veg | OK     | 31,2082  | 169,48   | 2,44112       | -4,59049      | 4,4221E-06 | 6,9255E-05 | yes |
| AN2416 | ChrVII_A_nidulans_FGSC_A4:3855320-3856840 | WT_5hasex | WT_veg | OK     | 62,0386  | 120,033  | 0,952191      | -1,92928      | 0,0536962  | 0,18664    | no  |
| AN2417 | ChrVII_A_nidulans_FGSC_A4:3857300-3860586 | WT_5hasex | WT_veg | OK     | 8,08824  | 12,6123  | 0,640936      | -1,17849      | 0,238601   | 0,50414    | no  |
| AN2419 | ChrVII_A_nidulans_FGSC_A4:3863391-3865091 | WT_5hasex | WT_veg | OK     | 86,699   | 222,885  | 1,36221       | -2,82646      | 0,00470651 | 0,0283418  | yes |
| AN2420 | ChrVII_A_nidulans_FGSC_A4:3866482-3870208 | WT_5hasex | WT_veg | OK     | 33,5777  | 67,5668  | 1,00881       | -2,11546      | 0,0343912  | 0,134933   | no  |
| AN2422 | ChrVII_A_nidulans_FGSC_A4:3883269-3885605 | WT_5hasex | WT_veg | OK     | 4,56562  | 27,974   | 2,61521       | -4,12534      | 3,7019E-05 | 0,000461   | yes |
| AN2423 | ChrVII_A_nidulans_FGSC_A4:3886476-3887301 | WT_5hasex | WT_veg | OK     | 5,85784  | 32,4515  | 2,46985       | -3,31262      | 0,00092428 | 0,00735631 | yes |
| AN2424 | ChrVII_A_nidulans_FGSC_A4:3903089-3906191 | WT_5hasex | WT_veg | OK     | 3,84885  | 10,9063  | 1,50266       | -2,28672      | 0,0222125  | 0,0963877  | no  |
| AN2425 | ChrVII_A_nidulans_FGSC_A4:3914376-3917206 | WT_5hasex | WT_veg | OK     | 161,995  | 414,481  | 1,35535       | -2,3668       | 0,0179427  | 0,0819879  | no  |
| AN2427 | ChrVII_A_nidulans_FGSC_A4:3920651-3922093 | WT_5hasex | WT_veg | OK     | 93,7984  | 88,3759  | -0,0859108    | 0,158513      | 0,874052   | 0,951771   | no  |



## Supplementary table 1

|        |                                           |           |        |        |          |         |            |           |            |            |     |
|--------|-------------------------------------------|-----------|--------|--------|----------|---------|------------|-----------|------------|------------|-----|
| AN2429 | ChrVII_A_nidulans_FGSC_A4:3928901-3931435 | WT_5hasex | WT_veg | OK     | 3,08072  | 4,76205 | 0,628316   | -0,928225 | 0,353291   | 0,628838   | no  |
| AN2430 | ChrVII_A_nidulans_FGSC_A4:3932420-3933971 | WT_5hasex | WT_veg | OK     | 10,5539  | 27,7625 | 1,39535    | -2,33184  | 0,0197089  | 0,0881141  | no  |
| AN2432 | ChrVII_A_nidulans_FGSC_A4:3936950-3937960 | WT_5hasex | WT_veg | OK     | 388,794  | 642,714 | 0,72517    | -1,3301   | 0,183485   | 0,431301   | no  |
| AN2433 | ChrVII_A_nidulans_FGSC_A4:3938165-3939683 | WT_5hasex | WT_veg | OK     | 48,0234  | 68,6139 | 0,514763   | -1,0536   | 0,292066   | 0,566825   | no  |
| AN2434 | ChrVII_A_nidulans_FGSC_A4:3939852-3941113 | WT_5hasex | WT_veg | OK     | 28,729   | 67,1683 | 1,22527    | -2,37449  | 0,017573   | 0,0807064  | no  |
| AN2437 | ChrVII_A_nidulans_FGSC_A4:3950531-3951362 | WT_5hasex | WT_veg | OK     | 9,07849  | 21,1054 | 1,21709    | -1,7861   | 0,0740824  | 0,234594   | no  |
| AN2438 | ChrVII_A_nidulans_FGSC_A4:3951519-3952700 | WT_5hasex | WT_veg | OK     | 44,909   | 55,2742 | 0,299601   | -0,595045 | 0,551814   | 0,783161   | no  |
| AN2440 | ChrVII_A_nidulans_FGSC_A4:3954206-3955246 | WT_5hasex | WT_veg | OK     | 116,058  | 250,833 | 1,11188    | -2,30678  | 0,021067   | 0,0927846  | no  |
| AN2441 | ChrVII_A_nidulans_FGSC_A4:3955717-3957544 | WT_5hasex | WT_veg | OK     | 52,3765  | 72,6814 | 0,472666   | -0,975209 | 0,329457   | 0,605974   | no  |
| AN2442 | ChrVII_A_nidulans_FGSC_A4:3957966-3960985 | WT_5hasex | WT_veg | OK     | 29,3602  | 32,4366 | 0,143759   | -0,295597 | 0,767538   | 0,904491   | no  |
| AN2443 | ChrVII_A_nidulans_FGSC_A4:3961483-3962000 | WT_5hasex | WT_veg | OK     | 5,93398  | 11,1409 | 0,908794   | -1,05889  | 0,289651   | 0,564395   | no  |
| AN2444 | ChrVII_A_nidulans_FGSC_A4:3962225-3962714 | WT_5hasex | WT_veg | OK     | 3,24234  | 11,579  | 1,8364     | -1,98732  | 0,046887   | 0,169794   | no  |
| AN2445 | ChrVII_A_nidulans_FGSC_A4:3963237-3964131 | WT_5hasex | WT_veg | OK     | 56,3436  | 51,3126 | -0,134941  | 0,259958  | 0,794896   | 0,916665   | no  |
| AN2446 | ChrVII_A_nidulans_FGSC_A4:3965033-3965740 | WT_5hasex | WT_veg | OK     | 68,6573  | 148,646 | 1,1144     | -2,20461  | 0,0274811  | 0,113346   | no  |
| AN2447 | ChrVII_A_nidulans_FGSC_A4:3966818-3968446 | WT_5hasex | WT_veg | OK     | 32,6073  | 41,0942 | 0,33374    | -0,667411 | 0,50451    | 0,752728   | no  |
| AN2448 | ChrVII_A_nidulans_FGSC_A4:3968804-3969957 | WT_5hasex | WT_veg | OK     | 14,1638  | 20,2263 | 0,514023   | -0,760625 | 0,446881   | 0,710051   | no  |
| AN2450 | ChrVII_A_nidulans_FGSC_A4:3975098-3977785 | WT_5hasex | WT_veg | OK     | 59,4297  | 129,332 | 1,12182    | -2,34141  | 0,0192109  | 0,0862952  | no  |
| AN2451 | ChrVII_A_nidulans_FGSC_A4:3978779-3980204 | WT_5hasex | WT_veg | OK     | 9,79411  | 49,7244 | 2,34397    | -3,82585  | 0,00013032 | 0,00138355 | yes |
| AN2452 | ChrVII_A_nidulans_FGSC_A4:3980558-3981327 | WT_5hasex | WT_veg | OK     | 8,24024  | 19,1774 | 1,21865    | -1,75038  | 0,0800528  | 0,24796    | no  |
| AN2455 | ChrVII_A_nidulans_FGSC_A4:3990102-3991715 | WT_5hasex | WT_veg | OK     | 96,7924  | 271,378 | 1,48734    | -2,80029  | 0,00510566 | 0,0302415  | yes |
| AN2456 | ChrVII_A_nidulans_FGSC_A4:3992016-3995630 | WT_5hasex | WT_veg | OK     | 14,0145  | 29,5511 | 1,07629    | -2,17205  | 0,0298517  | 0,120916   | no  |
| AN2457 | ChrVII_A_nidulans_FGSC_A4:3995632-3998028 | WT_5hasex | WT_veg | OK     | 9,03878  | 13,6433 | 0,593993   | -1,04869  | 0,294322   | 0,569075   | no  |
| AN2460 | ChrVII_A_nidulans_FGSC_A4:4009960-4012020 | WT_5hasex | WT_veg | OK     | 11,5521  | 25,9872 | 1,16965    | -2,16028  | 0,0307512  | 0,123689   | no  |
| AN2465 | ChrVII_A_nidulans_FGSC_A4:4030525-4032207 | WT_5hasex | WT_veg | NOTEST | 1,72614  | 1,86741 | 0,113488   | -0,128585 | 0,897686   | 1          | no  |
| AN2466 | ChrVII_A_nidulans_FGSC_A4:4036497-4038647 | WT_5hasex | WT_veg | OK     | 28,8692  | 63,0349 | 1,12662    | -2,19289  | 0,0283153  | 0,115939   | no  |
| AN2467 | ChrVII_A_nidulans_FGSC_A4:4039373-4041698 | WT_5hasex | WT_veg | OK     | 36,2664  | 101,652 | 1,48693    | -3,10662  | 0,00189242 | 0,0133253  | yes |
| AN2468 | ChrVII_A_nidulans_FGSC_A4:4042417-4044278 | WT_5hasex | WT_veg | OK     | 7,43381  | 10,8505 | 0,545593   | -0,875619 | 0,381237   | 0,65554    | no  |
| AN2469 | ChrVII_A_nidulans_FGSC_A4:4050395-4051271 | WT_5hasex | WT_veg | OK     | 18,7933  | 6,29022 | -1,57904   | 2,23753   | 0,0252516  | 0,106304   | no  |
| AN2470 | ChrVII_A_nidulans_FGSC_A4:4052179-4054372 | WT_5hasex | WT_veg | OK     | 18,1907  | 22,421  | 0,301652   | -0,549549 | 0,582629   | 0,802814   | no  |
| AN2471 | ChrVII_A_nidulans_FGSC_A4:4052179-4054372 | WT_5hasex | WT_veg | OK     | 13,3282  | 12,0485 | -0,145618  | 0,188432  | 0,850538   | 0,941247   | no  |
| AN2472 | ChrVII_A_nidulans_FGSC_A4:4054710-4055921 | WT_5hasex | WT_veg | NOTEST | 0,857805 | 3,39516 | 1,98476    | -1,86907  | 0,0616132  | 1          | no  |
| AN2473 | ChrVII_A_nidulans_FGSC_A4:4056917-4058131 | WT_5hasex | WT_veg | OK     | 62,4829  | 165,833 | 1,4082     | -2,88651  | 0,00389546 | 0,0242671  | yes |
| AN2474 | ChrVII_A_nidulans_FGSC_A4:4059255-4060347 | WT_5hasex | WT_veg | OK     | 126,346  | 64,7559 | -0,964293  | 1,89936   | 0,0575172  | 0,195978   | no  |
| AN2476 | ChrVII_A_nidulans_FGSC_A4:4065144-4066347 | WT_5hasex | WT_veg | OK     | 32,2281  | 22,9295 | -0,491115  | 0,948679  | 0,342784   | 0,618219   | no  |
| AN2477 | ChrVII_A_nidulans_FGSC_A4:4066811-4069328 | WT_5hasex | WT_veg | OK     | 214,996  | 881,744 | 2,03605    | -3,66177  | 0,00025048 | 0,00241859 | yes |
| AN2478 | ChrVII_A_nidulans_FGSC_A4:4070239-4071238 | WT_5hasex | WT_veg | OK     | 5,95925  | 11,1913 | 0,909174   | -1,22746  | 0,219648   | 0,480884   | no  |
| AN2479 | ChrVII_A_nidulans_FGSC_A4:4071495-4072104 | WT_5hasex | WT_veg | OK     | 40,545   | 86,6117 | 1,09504    | -1,95267  | 0,0508584  | 0,179794   | no  |
| AN2480 | ChrVII_A_nidulans_FGSC_A4:4072408-4075987 | WT_5hasex | WT_veg | OK     | 24,2046  | 32,3094 | 0,416676   | -0,864486 | 0,387321   | 0,660806   | no  |
| AN2481 | ChrVII_A_nidulans_FGSC_A4:4077053-4081893 | WT_5hasex | WT_veg | OK     | 44,7963  | 38,459  | -0,220059  | 0,450598  | 0,65228    | 0,84303    | no  |
| AN2482 | ChrVII_A_nidulans_FGSC_A4:4087089-4093176 | WT_5hasex | WT_veg | OK     | 8,29854  | 12,6058 | 0,603158   | -1,21591  | 0,22402    | 0,486027   | no  |
| AN2483 | ChrVII_A_nidulans_FGSC_A4:4093953-4095702 | WT_5hasex | WT_veg | OK     | 18,611   | 17,5976 | -0,0807781 | 0,14998   | 0,880781   | 0,95479    | no  |
| AN2484 | ChrVII_A_nidulans_FGSC_A4:4097472-4098540 | WT_5hasex | WT_veg | OK     | 866,703  | 1888,91 | 1,12395    | -2,08732  | 0,0368594  | 0,14202    | no  |
| AN2485 | ChrVII_A_nidulans_FGSC_A4:4100757-4101318 | WT_5hasex | WT_veg | OK     | 34,5754  | 61,2984 | 0,826103   | -1,44807  | 0,147598   | 0,375223   | no  |
| AN2486 | ChrVII_A_nidulans_FGSC_A4:4102346-4103676 | WT_5hasex | WT_veg | OK     | 12,0684  | 65,3426 | 2,43679    | -4,01059  | 6,0568E-05 | 0,00070835 | yes |
| AN2487 | ChrVII_A_nidulans_FGSC_A4:4105914-4108662 | WT_5hasex | WT_veg | OK     | 56,6544  | 122,385 | 1,11117    | -2,30843  | 0,0209753  | 0,0924664  | no  |
| AN2488 | ChrVII_A_nidulans_FGSC_A4:4109655-4111045 | WT_5hasex | WT_veg | OK     | 3180,92  | 2359,2  | -0,431145  | 0,518812  | 0,603892   | 0,815644   | no  |
| AN2489 | ChrVII_A_nidulans_FGSC_A4:4114059-4115574 | WT_5hasex | WT_veg | OK     | 40,1275  | 62,4088 | 0,637161   | -1,24976  | 0,211386   | 0,470018   | no  |
| AN2490 | ChrVII_A_nidulans_FGSC_A4:4116486-4118206 | WT_5hasex | WT_veg | OK     | 10,6439  | 20,6949 | 0,959249   | -1,648    | 0,0993532  | 0,287991   | no  |
| AN2491 | ChrVII_A_nidulans_FGSC_A4:4118671-4121989 | WT_5hasex | WT_veg | OK     | 15,8838  | 45,0838 | 1,50505    | -3,02788  | 0,00246278 | 0,0166008  | yes |
| AN2492 | ChrVII_A_nidulans_FGSC_A4:4122205-4124896 | WT_5hasex | WT_veg | OK     | 98,0669  | 221,651 | 1,17645    | -2,39434  | 0,0166504  | 0,0775361  | no  |
| AN2493 | ChrVII_A_nidulans_FGSC_A4:4125973-4128077 | WT_5hasex | WT_veg | OK     | 5,51115  | 13,4415 | 1,28626    | -2,09413  | 0,0362485  | 0,14037    | no  |
| AN2494 | ChrVII_A_nidulans_FGSC_A4:4130443-4132132 | WT_5hasex | WT_veg | OK     | 26,5062  | 90,1338 | 1,76574    | -3,30838  | 0,00093837 | 0,00745446 | yes |
| AN2495 | ChrVII_A_nidulans_FGSC_A4:4132457-4132934 | WT_5hasex | WT_veg | OK     | 10,6818  | 21,1546 | 0,98581    | -1,36105  | 0,173497   | 0,416605   | no  |

# Supplementary table 1

|        |                                           |           |        |        |          |           |               |               |            |            |     |
|--------|-------------------------------------------|-----------|--------|--------|----------|-----------|---------------|---------------|------------|------------|-----|
| AN2496 | ChrVII_A_nidulans_FGSC_A4:4134174-4137945 | WT_5hasex | WT_veg | OK     | 30,7786  | 62,1798   | 1,01452       | -2,11273      | 0,0346237  | 0,135642   | no  |
| AN2497 | ChrVII_A_nidulans_FGSC_A4:4138346-4139318 | WT_5hasex | WT_veg | OK     | 28,415   | 57,5124   | 1,01722       | -1,88414      | 0,0595467  | 0,20121    | no  |
| AN2498 | ChrVII_A_nidulans_FGSC_A4:4142792-4144587 | WT_5hasex | WT_veg | OK     | 99,6115  | 27,4524   | -1,85938      | 3,72213       | 0,00019755 | 0,00197182 | yes |
| AN2499 | ChrVII_A_nidulans_FGSC_A4:4145706-4147149 | WT_5hasex | WT_veg | OK     | 10,04    | 24,578    | 1,2916        | -2,16842      | 0,0301268  | 0,121721   | no  |
| AN2500 | ChrVII_A_nidulans_FGSC_A4:4147455-4148335 | WT_5hasex | WT_veg | OK     | 17,6011  | 33,2456   | 0,917497      | -1,53086      | 0,125804   | 0,337749   | no  |
| AN2501 | ChrVII_A_nidulans_FGSC_A4:4149245-4149829 | WT_5hasex | WT_veg | OK     | 91,0578  | 79,3984   | -0,197674     | 0,398688      | 0,690123   | 0,863612   | no  |
| AN2502 | ChrVII_A_nidulans_FGSC_A4:4151583-4152440 | WT_5hasex | WT_veg | OK     | 59,7429  | 42,3894   | -0,495063     | 0,924711      | 0,355116   | 0,630636   | no  |
| AN2503 | ChrVII_A_nidulans_FGSC_A4:4154994-4156578 | WT_5hasex | WT_veg | OK     | 36,4639  | 45,5922   | 0,322318      | -0,601539     | 0,547481   | 0,780741   | no  |
| AN2504 | ChrVII_A_nidulans_FGSC_A4:4158058-4159512 | WT_5hasex | WT_veg | OK     | 4,41706  | 1,41152   | -1,64584      | 1,74546       | 0,080905   | 0,249666   | no  |
| AN2505 | ChrVII_A_nidulans_FGSC_A4:4167807-4169821 | WT_5hasex | WT_veg | OK     | 27,8667  | 80,0125   | 1,52169       | -3,10426      | 0,00190756 | 0,0134138  | yes |
| AN2506 | ChrVII_A_nidulans_FGSC_A4:4175493-4176704 | WT_5hasex | WT_veg | OK     | 1,6775   | 5,80808   | 1,79175       | -2,07185      | 0,0382796  | 0,146024   | no  |
| AN2507 | ChrVII_A_nidulans_FGSC_A4:4177833-4179463 | WT_5hasex | WT_veg | NOTEST | 0,110341 | 0         | -1.79769e+308 | -1.79769e+308 | 0,165569   | 1          | no  |
| AN2508 | ChrVII_A_nidulans_FGSC_A4:4181107-4182986 | WT_5hasex | WT_veg | OK     | 126,179  | 292,653   | 1,21372       | -2,46963      | 0,0135255  | 0,0660195  | no  |
| AN2509 | ChrVII_A_nidulans_FGSC_A4:4184335-4185850 | WT_5hasex | WT_veg | OK     | 99,6839  | 57,6629   | -0,789716     | 1,59022       | 0,111785   | 0,312442   | no  |
| AN2510 | ChrVII_A_nidulans_FGSC_A4:4188507-4189568 | WT_5hasex | WT_veg | OK     | 13,307   | 12,2543   | -0,118898     | 0,180419      | 0,856824   | 0,944195   | no  |
| AN2513 | ChrVII_A_nidulans_FGSC_A4:4198155-4199013 | WT_5hasex | WT_veg | OK     | 23,9335  | 37,4609   | 0,646352      | -1,14602      | 0,251789   | 0,520523   | no  |
| AN2514 | ChrVII_A_nidulans_FGSC_A4:4199131-4200165 | WT_5hasex | WT_veg | OK     | 43,3185  | 71,2767   | 0,718447      | -1,41688      | 0,156517   | 0,38971    | no  |
| AN2515 | ChrVII_A_nidulans_FGSC_A4:4200394-4201540 | WT_5hasex | WT_veg | OK     | 63,0399  | 115,785   | 0,877109      | -1,75899      | 0,0785786  | 0,244707   | no  |
| AN2517 | ChrVII_A_nidulans_FGSC_A4:4204549-4208654 | WT_5hasex | WT_veg | OK     | 14,3386  | 13,1053   | -0,12975      | 0,25788       | 0,796499   | 0,917443   | no  |
| AN2518 | ChrVII_A_nidulans_FGSC_A4:4209866-4211637 | WT_5hasex | WT_veg | OK     | 22,8436  | 26,7758   | 0,229143      | -0,449859     | 0,652812   | 0,843291   | no  |
| AN2521 | ChrVII_A_nidulans_FGSC_A4:4215170-4217478 | WT_5hasex | WT_veg | OK     | 10,9444  | 10,4351   | -0,0687435    | 0,119336      | 0,905009   | 0,963752   | no  |
| AN2522 | ChrVII_A_nidulans_FGSC_A4:4217539-4219759 | WT_5hasex | WT_veg | OK     | 134,664  | 275,603   | 1,03323       | -2,07089      | 0,0383691  | 0,146323   | no  |
| AN2525 | ChrVII_A_nidulans_FGSC_A4:4233928-4235129 | WT_5hasex | WT_veg | OK     | 23,7226  | 36,9455   | 0,639135      | -1,177        | 0,239194   | 0,505047   | no  |
| AN2526 | ChrVII_A_nidulans_FGSC_A4:4235347-4236707 | WT_5hasex | WT_veg | OK     | 664,409  | 766,442   | 0,206106      | -0,297266     | 0,766264   | 0,903914   | no  |
| AN2527 | ChrVII_A_nidulans_FGSC_A4:4237290-4239912 | WT_5hasex | WT_veg | OK     | 18,2739  | 51,3586   | 1,49082       | -2,98347      | 0,00284997 | 0,0187195  | yes |
| AN2528 | ChrVII_A_nidulans_FGSC_A4:4240118-4240914 | WT_5hasex | WT_veg | OK     | 4,14769  | 2,00628   | -1,04779      | 0,9863        | 0,323986   | 0,600506   | no  |
| AN2529 | ChrVII_A_nidulans_FGSC_A4:4242831-4243866 | WT_5hasex | WT_veg | OK     | 25,2728  | 31,8303   | 0,332814      | -0,586976     | 0,55722    | 0,786976   | no  |
| AN2531 | ChrVII_A_nidulans_FGSC_A4:4247500-4249482 | WT_5hasex | WT_veg | OK     | 27,6107  | 89,9528   | 1,70394       | -3,37475      | 0,00073884 | 0,00606463 | yes |
| AN2532 | ChrVII_A_nidulans_FGSC_A4:4250546-4252779 | WT_5hasex | WT_veg | OK     | 42,0683  | 89,4902   | 1,08899       | -2,26794      | 0,0233331  | 0,100082   | no  |
| AN2533 | ChrVII_A_nidulans_FGSC_A4:4255738-4256936 | WT_5hasex | WT_veg | NOTEST | 0,766292 | 2,46806   | 1,68741       | -1,55242      | 0,120562   | 1          | no  |
| AN2535 | ChrVII_A_nidulans_FGSC_A4:4260088-4260571 | WT_5hasex | WT_veg | OK     | 193,385  | 1176,36   | 2,60479       | -5,40944      | 6,3221E-08 | 1,5436E-06 | yes |
| AN2537 | ChrVII_A_nidulans_FGSC_A4:4264489-4265865 | WT_5hasex | WT_veg | OK     | 11,3362  | 23,4215   | 1,04689       | -1,71897      | 0,085619   | 0,260063   | no  |
| AN2538 | ChrVII_A_nidulans_FGSC_A4:4267376-4268832 | WT_5hasex | WT_veg | OK     | 13,6855  | 30,9595   | 1,17774       | -1,81816      | 0,0690403  | 0,22331    | no  |
| AN2539 | ChrVII_A_nidulans_FGSC_A4:4269362-4270191 | WT_5hasex | WT_veg | OK     | 35,2914  | 78,9224   | 1,16112       | -1,90951      | 0,0561963  | 0,19276    | no  |
| AN2540 | ChrVII_A_nidulans_FGSC_A4:4271095-4272640 | WT_5hasex | WT_veg | NOTEST | 1,99444  | 3,34626   | 0,74657       | -0,82162      | 0,411293   | 1          | no  |
| AN2543 | ChrVII_A_nidulans_FGSC_A4:4281133-4283382 | WT_5hasex | WT_veg | NOTEST | 0        | 0         | 0             | 0             | 1          | 1          | no  |
| AN2544 | ChrVII_A_nidulans_FGSC_A4:4286765-4288313 | WT_5hasex | WT_veg | NOTEST | 0        | 0         | 0             | 0             | 1          | 1          | no  |
| AN2546 | ChrVII_A_nidulans_FGSC_A4:4311591-4312391 | WT_5hasex | WT_veg | OK     | 9,71233  | 7,1004    | -0,451917     | 0,505378      | 0,613294   | 0,82091    | no  |
| AN2550 | ChrVII_A_nidulans_FGSC_A4:4329169-4330170 | WT_5hasex | WT_veg | NOTEST | 0        | 0         | 0             | 0             | 1          | 1          | no  |
| AN2553 | ChrVII_A_nidulans_FGSC_A4:4341392-4343627 | WT_5hasex | WT_veg | OK     | 4,51278  | 8,62325   | 0,934217      | -1,3121       | 0,189487   | 0,439981   | no  |
| AN2554 | ChrVII_A_nidulans_FGSC_A4:4343886-4345610 | WT_5hasex | WT_veg | OK     | 17,7269  | 56,2296   | 1,66539       | -2,84488      | 0,00444281 | 0,027068   | yes |
| AN2555 | ChrVII_A_nidulans_FGSC_A4:4347448-4349288 | WT_5hasex | WT_veg | OK     | 694,393  | 300,029   | -1,21065      | 2,16507       | 0,0303822  | 0,122497   | no  |
| AN2556 | ChrVII_A_nidulans_FGSC_A4:4350919-4351438 | WT_5hasex | WT_veg | OK     | 173,465  | 236,81    | 0,449083      | -0,884624     | 0,376359   | 0,65109    | no  |
| AN2557 | ChrVII_A_nidulans_FGSC_A4:4351929-4353943 | WT_5hasex | WT_veg | NOTEST | 1,72473  | 0,0918089 | -4,23159      | 1,41869       | 0,155989   | 1          | no  |
| AN2558 | ChrVII_A_nidulans_FGSC_A4:4357064-4358993 | WT_5hasex | WT_veg | NOTEST | 0,542727 | 0,329173  | -0,721381     | 0,463148      | 0,643258   | 1          | no  |
| AN2559 | ChrVII_A_nidulans_FGSC_A4:4359862-4361299 | WT_5hasex | WT_veg | NOTEST | 0,961556 | 1,12929   | 0,231967      | -0,197218     | 0,843657   | 1          | no  |
| AN2560 | ChrVII_A_nidulans_FGSC_A4:4362122-4363846 | WT_5hasex | WT_veg | OK     | 2,14178  | 0         | -1.79769e+308 | -1.79769e+308 | 0,0308325  | 0,123969   | no  |
| AN2561 | ChrVII_A_nidulans_FGSC_A4:4364419-4365390 | WT_5hasex | WT_veg | OK     | 10,8691  | 2,4919    | -2,12492      | 2,40057       | 0,0163695  | 0,0765341  | no  |
| AN2562 | ChrVII_A_nidulans_FGSC_A4:4365994-4367556 | WT_5hasex | WT_veg | NOTEST | 0,349323 | 0,575088  | 0,71922       | -0,421817     | 0,673159   | 1          | no  |
| AN2563 | ChrVII_A_nidulans_FGSC_A4:4367985-4368556 | WT_5hasex | WT_veg | NOTEST | 0        | 0         | 0             | 0             | 1          | 1          | no  |
| AN2564 | ChrVII_A_nidulans_FGSC_A4:4368825-4370181 | WT_5hasex | WT_veg | NOTEST | 0        | 0         | 0             | 0             | 1          | 1          | no  |
| AN2565 | ChrVII_A_nidulans_FGSC_A4:4371775-4372498 | WT_5hasex | WT_veg | OK     | 3,50001  | 8,29725   | 1,24527       | -1,29485      | 0,195372   | 0,448047   | no  |
| AN2566 | ChrVII_A_nidulans_FGSC_A4:4373751-4375656 | WT_5hasex | WT_veg | NOTEST | 0,156168 | 0         | -1.79769e+308 | -1.79769e+308 | 0,224063   | 1          | no  |

## Supplementary table 1

|        |                                           |           |        |        |          |          |               |               |            |            |     |
|--------|-------------------------------------------|-----------|--------|--------|----------|----------|---------------|---------------|------------|------------|-----|
| AN2567 | ChrVII_A_nidulans_FGSC_A4:4377887-4378332 | WT_5hasex | WT_veg | OK     | 276,701  | 176,783  | -0,646346     | 1,17745       | 0,239014   | 0,504813   | no  |
| AN2568 | ChrVII_A_nidulans_FGSC_A4:4378733-4379771 | WT_5hasex | WT_veg | NOTEST | 0        | 0        | 0             | 0             | 1          | 1          | no  |
| AN2570 | ChrVII_A_nidulans_FGSC_A4:4383687-4384704 | WT_5hasex | WT_veg | OK     | 4,72661  | 3,2665   | -0,533063     | 0,59825       | 0,549673   | 0,781909   | no  |
| AN2571 | ChrVII_A_nidulans_FGSC_A4:4386507-4387064 | WT_5hasex | WT_veg | OK     | 435,077  | 148,64   | -1,54945      | 2,45038       | 0,0142707  | 0,0688404  | no  |
| AN2572 | ChrVII_A_nidulans_FGSC_A4:4390036-4392578 | WT_5hasex | WT_veg | OK     | 20,8205  | 30,5865  | 0,554891      | -0,884427     | 0,376466   | 0,6511     | no  |
| AN2573 | ChrVII_A_nidulans_FGSC_A4:4393768-4394751 | WT_5hasex | WT_veg | NOTEST | 1,42369  | 2,06328  | 0,535305      | -0,461098     | 0,644728   | 1          | no  |
| AN2574 | ChrVII_A_nidulans_FGSC_A4:4402612-4404410 | WT_5hasex | WT_veg | OK     | 11,5467  | 1,27766  | -3,1759       | 3,60963       | 0,00030663 | 0,00287395 | yes |
| AN2575 | ChrVII_A_nidulans_FGSC_A4:4406140-4407716 | WT_5hasex | WT_veg | OK     | 2,44107  | 1,09506  | -1,15651      | 0,99871       | 0,317935   | 0,594113   | no  |
| AN2576 | ChrVII_A_nidulans_FGSC_A4:4408276-4409863 | WT_5hasex | WT_veg | NOTEST | 0,900626 | 0,562577 | -0,678878     | 0,457466      | 0,647336   | 1          | no  |
| AN2577 | ChrVII_A_nidulans_FGSC_A4:4410748-4411920 | WT_5hasex | WT_veg | OK     | 16,479   | 48,0014  | 1,54245       | -2,63271      | 0,00847063 | 0,0456477  | yes |
| AN2578 | ChrVII_A_nidulans_FGSC_A4:4414498-4415630 | WT_5hasex | WT_veg | OK     | 804,587  | 1307,97  | 0,701007      | -1,16844      | 0,24263    | 0,509435   | no  |
| AN2580 | ChrVII_A_nidulans_FGSC_A4:4425302-4426844 | WT_5hasex | WT_veg | NOTEST | 0        | 0        | 0             | 0             | 1          | 1          | no  |
| AN2581 | ChrVII_A_nidulans_FGSC_A4:4429218-4433463 | WT_5hasex | WT_veg | OK     | 67,5597  | 209,334  | 1,63157       | -3,20266      | 0,00136163 | 0,0101271  | yes |
| AN2582 | ChrVII_A_nidulans_FGSC_A4:4433651-4435374 | WT_5hasex | WT_veg | OK     | 883,155  | 1800,31  | 1,02751       | -1,6651       | 0,095892   | 0,28114    | no  |
| AN2584 | ChrVII_A_nidulans_FGSC_A4:4438431-4440006 | WT_5hasex | WT_veg | OK     | 136,188  | 307,101  | 1,17311       | -2,2633       | 0,0236169  | 0,100993   | no  |
| AN2585 | ChrVII_A_nidulans_FGSC_A4:4443448-4445398 | WT_5hasex | WT_veg | OK     | 34,8716  | 108,831  | 1,64197       | -2,7779       | 0,00547108 | 0,0319687  | yes |
| AN2586 | ChrVII_A_nidulans_FGSC_A4:4447765-4450154 | WT_5hasex | WT_veg | NOTEST | 1,47909  | 2,09271  | 0,500666      | -0,628496     | 0,529679   | 1          | no  |
| AN2587 | ChrVII_A_nidulans_FGSC_A4:4451266-4453096 | WT_5hasex | WT_veg | OK     | 2,39538  | 10,8598  | 2,18067       | -2,94125      | 0,00326893 | 0,0210079  | yes |
| AN2588 | ChrVII_A_nidulans_FGSC_A4:4454812-4456159 | WT_5hasex | WT_veg | OK     | 1,02591  | 4,06706  | 1,98708       | -2,14533      | 0,0319267  | 0,127352   | no  |
| AN2589 | ChrVII_A_nidulans_FGSC_A4:4457306-4457816 | WT_5hasex | WT_veg | NOTEST | 0        | 0        | 0             | 0             | 1          | 1          | no  |
| AN2590 | ChrVII_A_nidulans_FGSC_A4:4459411-4461079 | WT_5hasex | WT_veg | OK     | 4,82756  | 5,63523  | 0,223179      | -0,291883     | 0,770376   | 0,905602   | no  |
| AN2591 | ChrVII_A_nidulans_FGSC_A4:4461727-4463332 | WT_5hasex | WT_veg | OK     | 1,15238  | 4,8591   | 2,07607       | -2,05857      | 0,0395357  | 0,149558   | no  |
| AN2592 | ChrVII_A_nidulans_FGSC_A4:4463337-4464471 | WT_5hasex | WT_veg | OK     | 4,72121  | 22,5982  | 2,25898       | -3,24285      | 0,00118341 | 0,00902401 | yes |
| AN2593 | ChrVII_A_nidulans_FGSC_A4:4465735-4467273 | WT_5hasex | WT_veg | NOTEST | 0,403056 | 0        | -1.79769e+308 | -1.79769e+308 | 0,0966285  | 1          | no  |
| AN2594 | ChrVII_A_nidulans_FGSC_A4:4467450-4468164 | WT_5hasex | WT_veg | OK     | 26,6688  | 108,336  | 2,02228       | -3,32231      | 0,00089276 | 0,00714673 | yes |
| AN2595 | ChrVII_A_nidulans_FGSC_A4:4469241-4469917 | WT_5hasex | WT_veg | NOTEST | 0        | 0        | 0             | 0             | 1          | 1          | no  |
| AN2597 | ChrVII_A_nidulans_FGSC_A4:4475068-4476695 | WT_5hasex | WT_veg | OK     | 45,1966  | 105,263  | 1,21971       | -2,51092      | 0,0120417  | 0,0603376  | no  |
| AN2598 | ChrVII_A_nidulans_FGSC_A4:4477626-4480206 | WT_5hasex | WT_veg | NOTEST | 0,4085   | 0,590598 | 0,531841      | -0,410099     | 0,681733   | 1          | no  |
| AN2599 | ChrVII_A_nidulans_FGSC_A4:4481916-4483806 | WT_5hasex | WT_veg | NOTEST | 0,589347 | 0        | -1.79769e+308 | -1.79769e+308 | 0,0561526  | 1          | no  |
| AN2600 | ChrVII_A_nidulans_FGSC_A4:4484448-4485051 | WT_5hasex | WT_veg | NOTEST | 0        | 0        | 0             | 0             | 1          | 1          | no  |
| AN2601 | ChrVII_A_nidulans_FGSC_A4:4485368-4487179 | WT_5hasex | WT_veg | NOTEST | 0,359622 | 1,46838  | 2,02967       | -1,77036      | 0,0766674  | 1          | no  |
| AN2602 | ChrVII_A_nidulans_FGSC_A4:4491304-4493430 | WT_5hasex | WT_veg | OK     | 3,19977  | 28,464   | 3,1531        | -4,12137      | 3,7662E-05 | 0,0004679  | yes |
| AN2603 | ChrVII_A_nidulans_FGSC_A4:4493450-4495736 | WT_5hasex | WT_veg | NOTEST | 0        | 1,28124  | 1.79769e+308  | 1.79769e+308  | 0,036343   | 1          | no  |
| AN2604 | ChrVII_A_nidulans_FGSC_A4:4499595-4501100 | WT_5hasex | WT_veg | OK     | 3,49207  | 19,1852  | 2,45784       | -2,84352      | 0,0044618  | 0,0271711  | yes |
| AN2605 | ChrVII_A_nidulans_FGSC_A4:4503827-4504780 | WT_5hasex | WT_veg | NOTEST | 0        | 0        | 0             | 0             | 1          | 1          | no  |
| AN2606 | ChrVII_A_nidulans_FGSC_A4:4504983-4507144 | WT_5hasex | WT_veg | NOTEST | 1,41145  | 0,430655 | -1,71257      | 1,17663       | 0,239343   | 1          | no  |
| AN2608 | ChrVII_A_nidulans_FGSC_A4:4514232-4515759 | WT_5hasex | WT_veg | NOTEST | 0,461702 | 0,40486  | -0,189539     | 0,11963       | 0,904777   | 1          | no  |
| AN2609 | ChrVII_A_nidulans_FGSC_A4:4515791-4517217 | WT_5hasex | WT_veg | OK     | 2,79457  | 7,3069   | 1,38663       | -1,52882      | 0,126308   | 0,338681   | no  |
| AN2611 | ChrVII_A_nidulans_FGSC_A4:4524935-4527387 | WT_5hasex | WT_veg | NOTEST | 0        | 0        | 0             | 0             | 1          | 1          | no  |
| AN2613 | ChrVII_A_nidulans_FGSC_A4:4533226-4534916 | WT_5hasex | WT_veg | NOTEST | 1,76398  | 0,520667 | -1,7604       | 1,23377       | 0,217287   | 1          | no  |
| AN2614 | ChrVII_A_nidulans_FGSC_A4:4536923-4538711 | WT_5hasex | WT_veg | OK     | 9,19932  | 11,3355  | 0,301247      | -0,491392     | 0,623149   | 0,826021   | no  |
| AN2615 | ChrVII_A_nidulans_FGSC_A4:4541347-4543456 | WT_5hasex | WT_veg | OK     | 5,84945  | 2,53164  | -1,20823      | 1,73442       | 0,0828431  | 0,254017   | no  |
| AN2616 | ChrVI_A_nidulans_FGSC_A4:3391738-3394562  | WT_5hasex | WT_veg | NOTEST | 0        | 0        | 0             | 0             | 1          | 1          | no  |
| AN2617 | ChrVI_A_nidulans_FGSC_A4:3386748-3387841  | WT_5hasex | WT_veg | OK     | 1,89277  | 1,02339  | -0,887138     | 0,719482      | 0,471844   | 0,729218   | no  |
| AN2618 | ChrVI_A_nidulans_FGSC_A4:3385232-3385995  | WT_5hasex | WT_veg | NOTEST | 0,613754 | 0        | -1.79769e+308 | -1.79769e+308 | 0,137528   | 1          | no  |
| AN2619 | ChrVI_A_nidulans_FGSC_A4:3381682-3382897  | WT_5hasex | WT_veg | NOTEST | 0        | 0        | 0             | 0             | 1          | 1          | no  |
| AN2624 | ChrVI_A_nidulans_FGSC_A4:3355557-3356389  | WT_5hasex | WT_veg | NOTEST | 0        | 0        | 0             | 0             | 1          | 1          | no  |
| AN2625 | ChrVI_A_nidulans_FGSC_A4:3351406-3353086  | WT_5hasex | WT_veg | NOTEST | 0,372679 | 1,17291  | 1,65408       | -1,39042      | 0,1644     | 1          | no  |
| AN2626 | ChrVI_A_nidulans_FGSC_A4:3346885-3348189  | WT_5hasex | WT_veg | OK     | 47,1182  | 75,3995  | 0,678271      | -1,37521      | 0,169065   | 0,409302   | no  |
| AN2628 | ChrVI_A_nidulans_FGSC_A4:3335693-3337086  | WT_5hasex | WT_veg | OK     | 1,27056  | 7,51576  | 2,56445       | -2,96922      | 0,00298555 | 0,0194758  | yes |
| AN2629 | ChrVI_A_nidulans_FGSC_A4:3330000-3332002  | WT_5hasex | WT_veg | OK     | 13,2905  | 30,9835  | 1,2211        | -2,18195      | 0,0291135  | 0,118512   | no  |
| AN2630 | ChrVI_A_nidulans_FGSC_A4:3324199-3325117  | WT_5hasex | WT_veg | OK     | 1,80174  | 0        | -1.79769e+308 | -1.79769e+308 | 0,0908325  | 0,270621   | no  |
| AN2631 | ChrVI_A_nidulans_FGSC_A4:3321082-3323265  | WT_5hasex | WT_veg | NOTEST | 0,117142 | 0,403639 | 1,78481       | -0,785106     | 0,432391   | 1          | no  |

## Supplementary table 1

|        |                                          |           |        |        |           |          |               |               |            |            |     |
|--------|------------------------------------------|-----------|--------|--------|-----------|----------|---------------|---------------|------------|------------|-----|
| AN2633 | ChrVI_A_nidulans_FGSC_A4:3315308-3315950 | WT_5hasex | WT_veg | NOTEST | 0,478795  | 1,79998  | 1,9105        | -0,840398     | 0,400685   | 1          | no  |
| AN2634 | ChrVI_A_nidulans_FGSC_A4:3311955-3314708 | WT_5hasex | WT_veg | NOTEST | 0         | 0        | 0             | 0             | 1          | 1          | no  |
| AN2635 | ChrVI_A_nidulans_FGSC_A4:3308359-3309634 | WT_5hasex | WT_veg | NOTEST | 0         | 0        | 0             | 0             | 1          | 1          | no  |
| AN2636 | ChrVI_A_nidulans_FGSC_A4:3299324-3301284 | WT_5hasex | WT_veg | OK     | 3,10315   | 5,70638  | 0,878844      | -1,22936      | 0,218936   | 0,479791   | no  |
| AN2637 | ChrVI_A_nidulans_FGSC_A4:3297646-3298669 | WT_5hasex | WT_veg | OK     | 5,7756    | 9,62546  | 0,736884      | -1,05227      | 0,292678   | 0,567531   | no  |
| AN2639 | ChrVI_A_nidulans_FGSC_A4:3291944-3293142 | WT_5hasex | WT_veg | OK     | 13,4598   | 20,2216  | 0,587241      | -0,928487     | 0,353155   | 0,628729   | no  |
| AN2640 | ChrVI_A_nidulans_FGSC_A4:3290104-3291205 | WT_5hasex | WT_veg | OK     | 5,37181   | 38,7676  | 2,85137       | -4,27989      | 1,8699E-05 | 0,00025176 | yes |
| AN2642 | ChrVI_A_nidulans_FGSC_A4:3282948-3283395 | WT_5hasex | WT_veg | NOTEST | 0         | 0        | 0             | 0             | 1          | 1          | no  |
| AN2643 | ChrVI_A_nidulans_FGSC_A4:3279680-3281444 | WT_5hasex | WT_veg | NOTEST | 0,552197  | 0        | -1.79769e+308 | -1.79769e+308 | 0,0341325  | 1          | no  |
| AN2644 | ChrVI_A_nidulans_FGSC_A4:3277072-3279162 | WT_5hasex | WT_veg | NOTEST | 0,243502  | 1,16195  | 2,25454       | -1,70013      | 0,0891064  | 1          | no  |
| AN2645 | ChrVI_A_nidulans_FGSC_A4:3275281-3276163 | WT_5hasex | WT_veg | NOTEST | 0         | 0        | 0             | 0             | 1          | 1          | no  |
| AN2646 | ChrVI_A_nidulans_FGSC_A4:3271027-3273468 | WT_5hasex | WT_veg | OK     | 16,0759   | 86,2642  | 2,42386       | -4,10699      | 4,0085E-05 | 0,00049425 | yes |
| AN2647 | ChrVI_A_nidulans_FGSC_A4:3269250-3270654 | WT_5hasex | WT_veg | OK     | 12,226    | 27,8475  | 1,18759       | -1,91173      | 0,0559103  | 0,192081   | no  |
| AN2648 | ChrVI_A_nidulans_FGSC_A4:3265819-3267761 | WT_5hasex | WT_veg | OK     | 12,4311   | 53,9083  | 2,11655       | -3,6969       | 0,00021825 | 0,00214649 | yes |
| AN2649 | ChrVI_A_nidulans_FGSC_A4:3263209-3264476 | WT_5hasex | WT_veg | OK     | 4,78981   | 27,3933  | 2,51578       | -3,50811      | 0,00045131 | 0,00399022 | yes |
| AN2650 | ChrVI_A_nidulans_FGSC_A4:3260229-3262205 | WT_5hasex | WT_veg | OK     | 7,60588   | 15,6497  | 1,04095       | -1,71315      | 0,0866855  | 0,262308   | no  |
| AN2651 | ChrVI_A_nidulans_FGSC_A4:3257739-3258767 | WT_5hasex | WT_veg | NOTEST | 0,29499   | 2,58742  | 3,13278       | -1,56126      | 0,118461   | 1          | no  |
| AN2652 | ChrVI_A_nidulans_FGSC_A4:3255422-3257448 | WT_5hasex | WT_veg | NOTEST | 0,912551  | 2,46177  | 1,43172       | -1,61604      | 0,106087   | 1          | no  |
| AN2653 | ChrVI_A_nidulans_FGSC_A4:3253256-3254761 | WT_5hasex | WT_veg | NOTEST | 0,305666  | 1,74466  | 2,51292       | -1,73716      | 0,0823593  | 1          | no  |
| AN2655 | ChrVI_A_nidulans_FGSC_A4:3248658-3249869 | WT_5hasex | WT_veg | NOTEST | 0         | 0        | 0             | 0             | 1          | 1          | no  |
| AN2656 | ChrVI_A_nidulans_FGSC_A4:3246154-3247898 | WT_5hasex | WT_veg | NOTEST | 0         | 0        | 0             | 0             | 1          | 1          | no  |
| AN2657 | ChrVI_A_nidulans_FGSC_A4:3243363-3245208 | WT_5hasex | WT_veg | OK     | 1,89175   | 5,09106  | 1,42824       | -1,85923      | 0,0629944  | 0,209072   | no  |
| AN2658 | ChrVI_A_nidulans_FGSC_A4:3240630-3243214 | WT_5hasex | WT_veg | OK     | 16,2109   | 23,1502  | 0,514059      | -0,954698     | 0,339731   | 0,615537   | no  |
| AN2659 | ChrVI_A_nidulans_FGSC_A4:3236528-3239651 | WT_5hasex | WT_veg | OK     | 17,7685   | 45,2126  | 1,3474        | -2,57642      | 0,00998288 | 0,0520572  | no  |
| AN2660 | ChrVI_A_nidulans_FGSC_A4:3232903-3234421 | WT_5hasex | WT_veg | OK     | 7,57758   | 25,1258  | 1,72936       | -2,83526      | 0,00457887 | 0,0277165  | yes |
| AN2661 | ChrVI_A_nidulans_FGSC_A4:3227178-3232218 | WT_5hasex | WT_veg | OK     | 11,8361   | 15,7659  | 0,413612      | -0,841788     | 0,399907   | 0,672203   | no  |
| AN2662 | ChrVI_A_nidulans_FGSC_A4:3224758-3226645 | WT_5hasex | WT_veg | OK     | 19,2667   | 41,0761  | 1,09219       | -1,7971       | 0,0723202  | 0,230764   | no  |
| AN2663 | ChrVI_A_nidulans_FGSC_A4:3222232-3223765 | WT_5hasex | WT_veg | OK     | 4,37791   | 12,4509  | 1,50794       | -1,81725      | 0,0691792  | 0,223567   | no  |
| AN2664 | ChrVI_A_nidulans_FGSC_A4:3219382-3221290 | WT_5hasex | WT_veg | OK     | 3,22793   | 9,8868   | 1,6149        | -2,29651      | 0,0216466  | 0,0946215  | no  |
| AN2665 | ChrVI_A_nidulans_FGSC_A4:3216603-3218384 | WT_5hasex | WT_veg | OK     | 2,04071   | 2,86135  | 0,487626      | -0,606034     | 0,544492   | 0,778725   | no  |
| AN2666 | ChrVI_A_nidulans_FGSC_A4:3214958-3216162 | WT_5hasex | WT_veg | OK     | 3,24892   | 3,33008  | 0,0355937     | -0,0425452    | 0,966064   | 0,987576   | no  |
| AN2667 | ChrVI_A_nidulans_FGSC_A4:3212381-3214859 | WT_5hasex | WT_veg | NOTEST | 1,00058   | 3,30508  | 1,72384       | -2,18562      | 0,0288435  | 1          | no  |
| AN2668 | ChrVI_A_nidulans_FGSC_A4:3210424-3211730 | WT_5hasex | WT_veg | OK     | 22,5055   | 71,9613  | 1,67695       | -3,03692      | 0,00239008 | 0,0162004  | yes |
| AN2669 | ChrVI_A_nidulans_FGSC_A4:3206332-3207474 | WT_5hasex | WT_veg | OK     | 7,72528   | 24,0189  | 1,63651       | -2,35994      | 0,0182778  | 0,0830914  | no  |
| AN2670 | ChrVI_A_nidulans_FGSC_A4:3197646-3202692 | WT_5hasex | WT_veg | OK     | 6,9312    | 13,8049  | 0,993998      | -1,91443      | 0,0555648  | 0,191284   | no  |
| AN2672 | ChrVI_A_nidulans_FGSC_A4:3191645-3194236 | WT_5hasex | WT_veg | NOTEST | 1,17534   | 0,655541 | -0,842325     | 0,767467      | 0,442804   | 1          | no  |
| AN2673 | ChrVI_A_nidulans_FGSC_A4:3187843-3189605 | WT_5hasex | WT_veg | NOTEST | 0         | 0        | 0             | 0             | 1          | 1          | no  |
| AN2674 | ChrVI_A_nidulans_FGSC_A4:3184196-3186266 | WT_5hasex | WT_veg | OK     | 8,68582   | 16,0336  | 0,884368      | -1,45835      | 0,144744   | 0,370537   | no  |
| AN2675 | ChrVI_A_nidulans_FGSC_A4:3182226-3183840 | WT_5hasex | WT_veg | OK     | 25,4405   | 7,75145  | -1,71459      | 2,94478       | 0,00323185 | 0,0208002  | yes |
| AN2676 | ChrVI_A_nidulans_FGSC_A4:3175559-3179148 | WT_5hasex | WT_veg | NOTEST | 0,0538668 | 0,192751 | 1,83927       | -0,930134     | 0,352302   | 1          | no  |
| AN2677 | ChrVI_A_nidulans_FGSC_A4:3172186-3175105 | WT_5hasex | WT_veg | NOTEST | 0,0643693 | 0        | -1.79769e+308 | -1.79769e+308 | 0,165569   | 1          | no  |
| AN2678 | ChrVI_A_nidulans_FGSC_A4:3170445-3171324 | WT_5hasex | WT_veg | NOTEST | 0         | 0        | 0             | 0             | 1          | 1          | no  |
| AN2679 | ChrVI_A_nidulans_FGSC_A4:3167735-3169841 | WT_5hasex | WT_veg | NOTEST | 0,116983  | 0        | -1.79769e+308 | -1.79769e+308 | 0,224063   | 1          | no  |
| AN2680 | ChrVI_A_nidulans_FGSC_A4:3165158-3166349 | WT_5hasex | WT_veg | NOTEST | 1,18694   | 1,18211  | -0,00589128   | 0,00452951    | 0,996386   | 1          | no  |
| AN2681 | ChrVI_A_nidulans_FGSC_A4:3162237-3164758 | WT_5hasex | WT_veg | OK     | 5,48826   | 10,2213  | 0,897157      | -1,44139      | 0,149476   | 0,378069   | no  |
| AN2682 | ChrVI_A_nidulans_FGSC_A4:3159494-3161143 | WT_5hasex | WT_veg | OK     | 74,7187   | 66,296   | -0,172546     | 0,355056      | 0,722548   | 0,881929   | no  |
| AN2683 | ChrVI_A_nidulans_FGSC_A4:3154708-3156334 | WT_5hasex | WT_veg | OK     | 49,5415   | 59,2173  | 0,257382      | -0,498636     | 0,618036   | 0,82343    | no  |
| AN2684 | ChrVI_A_nidulans_FGSC_A4:3152451-3154099 | WT_5hasex | WT_veg | OK     | 36,8405   | 82,795   | 1,16825       | -2,32452      | 0,0200974  | 0,0894775  | no  |
| AN2685 | ChrVI_A_nidulans_FGSC_A4:3149273-3150020 | WT_5hasex | WT_veg | OK     | 141,818   | 191,625  | 0,434241      | -0,76144      | 0,446394   | 0,709535   | no  |
| AN2686 | ChrVI_A_nidulans_FGSC_A4:3147285-3147776 | WT_5hasex | WT_veg | OK     | 49,5105   | 84,0491  | 0,763498      | -1,29232      | 0,196247   | 0,449149   | no  |
| AN2688 | ChrVI_A_nidulans_FGSC_A4:3142047-3144246 | WT_5hasex | WT_veg | OK     | 39,2015   | 48,4658  | 0,306059      | -0,628716     | 0,529535   | 0,76917    | no  |
| AN2689 | ChrVI_A_nidulans_FGSC_A4:3138703-3141834 | WT_5hasex | WT_veg | OK     | 2,7703    | 8,56506  | 1,62842       | -2,56431      | 0,0103381  | 0,0534783  | no  |
| AN2690 | ChrVI_A_nidulans_FGSC_A4:3136354-3137933 | WT_5hasex | WT_veg | OK     | 2,9948    | 7,16072  | 1,25764       | -1,64986      | 0,0989721  | 0,287189   | no  |

## Supplementary table 1

|        |                                          |           |        |        |          |          |               |               |            |            |     |
|--------|------------------------------------------|-----------|--------|--------|----------|----------|---------------|---------------|------------|------------|-----|
| AN2693 | ChrVI_A_nidulans_FGSC_A4:3125532-3127072 | WT_5hasex | WT_veg | OK     | 4,90397  | 15,8632  | 1,69366       | -2,56379      | 0,0103535  | 0,0535476  | no  |
| AN2694 | ChrVI_A_nidulans_FGSC_A4:3124099-3125016 | WT_5hasex | WT_veg | OK     | 48,7984  | 115,553  | 1,24365       | -2,37372      | 0,0176097  | 0,0808041  | no  |
| AN2695 | ChrVI_A_nidulans_FGSC_A4:3122444-3123476 | WT_5hasex | WT_veg | OK     | 1,10189  | 8,74626  | 2,98868       | -3,15414      | 0,00160971 | 0,0116572  | yes |
| AN2696 | ChrVI_A_nidulans_FGSC_A4:3120115-3121802 | WT_5hasex | WT_veg | NOTEST | 0        | 0        | 0             | 0             | 1          | 1          | no  |
| AN2697 | ChrVI_A_nidulans_FGSC_A4:3116263-3118079 | WT_5hasex | WT_veg | NOTEST | 0,838533 | 0        | -1.79769e+308 | -1.79769e+308 | 0,0407588  | 1          | no  |
| AN2698 | ChrVI_A_nidulans_FGSC_A4:3113905-3115111 | WT_5hasex | WT_veg | NOTEST | 2,13955  | 2,85473  | 0,416044      | -0,414628     | 0,678414   | 1          | no  |
| AN2699 | ChrVI_A_nidulans_FGSC_A4:3112118-3113522 | WT_5hasex | WT_veg | OK     | 7,12597  | 11,1272  | 0,642926      | -0,971529     | 0,331285   | 0,607651   | no  |
| AN2700 | ChrVI_A_nidulans_FGSC_A4:3110589-3111843 | WT_5hasex | WT_veg | OK     | 4,50092  | 8,95248  | 0,992067      | -1,36924      | 0,170924   | 0,412354   | no  |
| AN2701 | ChrVI_A_nidulans_FGSC_A4:3104668-3109566 | WT_5hasex | WT_veg | OK     | 37,2747  | 64,2105  | 0,784611      | -1,56477      | 0,117636   | 0,323233   | no  |
| AN2702 | ChrVI_A_nidulans_FGSC_A4:3098243-3099223 | WT_5hasex | WT_veg | OK     | 107,748  | 622,722  | 2,53092       | -4,68406      | 2,8125E-06 | 4,6376E-05 | yes |
| AN2703 | ChrVI_A_nidulans_FGSC_A4:3096961-3098185 | WT_5hasex | WT_veg | OK     | 99,6016  | 118,917  | 0,255719      | -0,506079     | 0,612801   | 0,820566   | no  |
| AN2704 | ChrVI_A_nidulans_FGSC_A4:3094382-3096119 | WT_5hasex | WT_veg | OK     | 21,5885  | 6,9583   | -1,63345      | 2,92235       | 0,00347401 | 0,0221251  | yes |
| AN2707 | ChrVI_A_nidulans_FGSC_A4:3085133-3086768 | WT_5hasex | WT_veg | NOTEST | 0,171558 | 0,566272 | 1,7228        | -0,757831     | 0,448552   | 1          | no  |
| AN2708 | ChrVI_A_nidulans_FGSC_A4:3080991-3082417 | WT_5hasex | WT_veg | NOTEST | 0        | 0        | 0             | 0             | 1          | 1          | no  |
| AN2710 | ChrVI_A_nidulans_FGSC_A4:3072846-3073600 | WT_5hasex | WT_veg | NOTEST | 0,985772 | 0        | -1.79769e+308 | -1.79769e+308 | 0,0703913  | 1          | no  |
| AN2711 | ChrVI_A_nidulans_FGSC_A4:3067213-3069430 | WT_5hasex | WT_veg | OK     | 4,44985  | 1,92666  | -1,20765      | 1,61939       | 0,105364   | 0,300381   | no  |
| AN2713 | ChrVI_A_nidulans_FGSC_A4:3060040-3061111 | WT_5hasex | WT_veg | OK     | 2,45775  | 2,92508  | 0,251139      | -0,283205     | 0,77702    | 0,908721   | no  |
| AN2714 | ChrVI_A_nidulans_FGSC_A4:3056191-3059607 | WT_5hasex | WT_veg | OK     | 10,9497  | 15,9888  | 0,546172      | -1,05979      | 0,289241   | 0,563922   | no  |
| AN2715 | ChrVI_A_nidulans_FGSC_A4:3051761-3052848 | WT_5hasex | WT_veg | OK     | 22,2349  | 60,0224  | 1,43267       | -2,57109      | 0,0101379  | 0,0526613  | no  |
| AN2716 | ChrVI_A_nidulans_FGSC_A4:3050236-3051318 | WT_5hasex | WT_veg | OK     | 1,08831  | 5,24027  | 2,26756       | -2,12468      | 0,0336133  | 0,132516   | no  |
| AN2718 | ChrVI_A_nidulans_FGSC_A4:3044308-3045251 | WT_5hasex | WT_veg | OK     | 1,75593  | 10,1792  | 2,53532       | -2,70178      | 0,006897   | 0,0386666  | yes |
| AN2719 | ChrVI_A_nidulans_FGSC_A4:3041445-3042093 | WT_5hasex | WT_veg | NOTEST | 0,604119 | 0        | -1.79769e+308 | -1.79769e+308 | 0,137528   | 1          | no  |
| AN2720 | ChrVI_A_nidulans_FGSC_A4:3038787-3039780 | WT_5hasex | WT_veg | OK     | 3,82176  | 0        | -1.79769e+308 | -1.79769e+308 | 0,0221766  | 0,0962867  | no  |
| AN2721 | ChrVI_A_nidulans_FGSC_A4:3036818-3037811 | WT_5hasex | WT_veg | NOTEST | 0        | 0        | 0             | 0             | 1          | 1          | no  |
| AN2722 | ChrVI_A_nidulans_FGSC_A4:3033806-3034984 | WT_5hasex | WT_veg | NOTEST | 0        | 0        | 0             | 0             | 1          | 1          | no  |
| AN2723 | ChrVI_A_nidulans_FGSC_A4:3031739-3033193 | WT_5hasex | WT_veg | NOTEST | 0,598757 | 3,24655  | 2,43886       | -2,46986      | 0,0135167  | 1          | no  |
| AN2725 | ChrVI_A_nidulans_FGSC_A4:3023125-3025310 | WT_5hasex | WT_veg | OK     | 5,03767  | 9,75477  | 0,953352      | -1,51576      | 0,129581   | 0,344562   | no  |
| AN2726 | ChrVI_A_nidulans_FGSC_A4:3018362-3019776 | WT_5hasex | WT_veg | NOTEST | 0,748714 | 1,67433  | 1,1611        | -0,924049     | 0,355461   | 1          | no  |
| AN2728 | ChrVI_A_nidulans_FGSC_A4:3011024-3011954 | WT_5hasex | WT_veg | NOTEST | 0        | 0        | 0             | 0             | 1          | 1          | no  |
| AN2729 | ChrVI_A_nidulans_FGSC_A4:3008548-3010452 | WT_5hasex | WT_veg | NOTEST | 0,125015 | 0        | -1.79769e+308 | -1.79769e+308 | 0,165569   | 1          | no  |
| AN2731 | ChrVI_A_nidulans_FGSC_A4:2989859-2992431 | WT_5hasex | WT_veg | OK     | 164,474  | 585,083  | 1,83079       | -3,52731      | 0,0004198  | 0,00374441 | yes |
| AN2732 | ChrVI_A_nidulans_FGSC_A4:2987959-2989626 | WT_5hasex | WT_veg | OK     | 11,7865  | 19,5397  | 0,729272      | -1,2741       | 0,202627   | 0,458313   | no  |
| AN2733 | ChrVI_A_nidulans_FGSC_A4:2985548-2986953 | WT_5hasex | WT_veg | OK     | 57,2011  | 46,6259  | -0,29491      | 0,59706       | 0,550467   | 0,78238    | no  |
| AN2734 | ChrVI_A_nidulans_FGSC_A4:2983726-2984940 | WT_5hasex | WT_veg | OK     | 1244,77  | 1348,01  | 0,114951      | -0,188056     | 0,850832   | 0,941353   | no  |
| AN2735 | ChrVI_A_nidulans_FGSC_A4:2981797-2983577 | WT_5hasex | WT_veg | OK     | 20,3786  | 54,2486  | 1,41253       | -2,72031      | 0,00652203 | 0,0370119  | yes |
| AN2736 | ChrVI_A_nidulans_FGSC_A4:2978840-2981502 | WT_5hasex | WT_veg | OK     | 30,3651  | 22,588   | -0,426857     | 0,878311      | 0,379775   | 0,654228   | no  |
| AN2737 | ChrVI_A_nidulans_FGSC_A4:2975872-2978326 | WT_5hasex | WT_veg | OK     | 27,8381  | 140,117  | 2,3315        | -4,82446      | 1,4038E-06 | 2,4917E-05 | yes |
| AN2738 | ChrVI_A_nidulans_FGSC_A4:2973810-2975183 | WT_5hasex | WT_veg | OK     | 30,5922  | 23,3158  | -0,391861     | 0,756664      | 0,449251   | 0,711745   | no  |
| AN2739 | ChrVI_A_nidulans_FGSC_A4:2970073-2973266 | WT_5hasex | WT_veg | OK     | 36,4919  | 30,6545  | -0,251477     | 0,490549      | 0,623746   | 0,826367   | no  |
| AN2741 | ChrVI_A_nidulans_FGSC_A4:2952101-2953083 | WT_5hasex | WT_veg | OK     | 56,9268  | 137,807  | 1,27547       | -2,54491      | 0,0109306  | 0,0558597  | no  |
| AN2743 | ChrVI_A_nidulans_FGSC_A4:2944031-2947428 | WT_5hasex | WT_veg | OK     | 45,2522  | 114,258  | 1,33624       | -2,7833       | 0,00538093 | 0,0315228  | yes |
| AN2744 | ChrVI_A_nidulans_FGSC_A4:2941374-2942684 | WT_5hasex | WT_veg | OK     | 18,0751  | 17,1259  | -0,07783      | 0,140243      | 0,888468   | 0,957978   | no  |
| AN2745 | ChrVI_A_nidulans_FGSC_A4:2940129-2940876 | WT_5hasex | WT_veg | OK     | 39,8801  | 70,6993  | 0,826028      | -1,4831       | 0,138049   | 0,359241   | no  |
| AN2746 | ChrVI_A_nidulans_FGSC_A4:2938362-2939735 | WT_5hasex | WT_veg | OK     | 22,0933  | 130,103  | 2,55798       | -4,65105      | 3,3025E-06 | 5,3627E-05 | yes |
| AN2747 | ChrVI_A_nidulans_FGSC_A4:2936205-2936921 | WT_5hasex | WT_veg | OK     | 80,7063  | 517,603  | 2,68109       | -5,21448      | 1,8434E-07 | 4,0399E-06 | yes |
| AN2748 | ChrVI_A_nidulans_FGSC_A4:2934078-2935882 | WT_5hasex | WT_veg | OK     | 6,3609   | 29,7927  | 2,22766       | -3,62968      | 0,00028377 | 0,00269049 | yes |
| AN2749 | ChrVI_A_nidulans_FGSC_A4:2929338-2933051 | WT_5hasex | WT_veg | OK     | 17,9632  | 37,9604  | 1,07946       | -2,24497      | 0,0247699  | 0,104635   | no  |
| AN2750 | ChrVI_A_nidulans_FGSC_A4:2924804-2926353 | WT_5hasex | WT_veg | NOTEST | 0,28264  | 0,567515 | 1,00569       | -0,57227      | 0,567139   | 1          | no  |
| AN2752 | ChrVI_A_nidulans_FGSC_A4:2917579-2919449 | WT_5hasex | WT_veg | OK     | 15,4641  | 33,9542  | 1,13467       | -2,11683      | 0,0342741  | 0,134595   | no  |
| AN2753 | ChrVI_A_nidulans_FGSC_A4:2916756-2917492 | WT_5hasex | WT_veg | OK     | 5,08807  | 20,9967  | 2,04498       | -2,55868      | 0,0105071  | 0,0541604  | no  |
| AN2757 | ChrVI_A_nidulans_FGSC_A4:2899697-2902540 | WT_5hasex | WT_veg | OK     | 25,3645  | 28,6932  | 0,177899      | -0,353531     | 0,723691   | 0,882337   | no  |
| AN2759 | ChrVI_A_nidulans_FGSC_A4:2888659-2890462 | WT_5hasex | WT_veg | OK     | 102,966  | 270,805  | 1,39509       | -2,85661      | 0,00428192 | 0,0262496  | yes |
| AN2760 | ChrVI_A_nidulans_FGSC_A4:2884959-2887299 | WT_5hasex | WT_veg | OK     | 146,884  | 89,2031  | -0,719514     | 1,23065       | 0,218455   | 0,479175   | no  |

# Supplementary table 1

|        |                                          |           |        |        |          |          |               |               |            |            |     |
|--------|------------------------------------------|-----------|--------|--------|----------|----------|---------------|---------------|------------|------------|-----|
| AN2761 | ChrVI_A_nidulans_FGSC_A4:2883417-2884838 | WT_5hasex | WT_veg | OK     | 1134,41  | 2239,09  | 0,980967      | -1,708        | 0,087637   | 0,264308   | no  |
| AN2762 | ChrVI_A_nidulans_FGSC_A4:2880954-2882473 | WT_5hasex | WT_veg | OK     | 38,4415  | 69,633   | 0,857104      | -1,70824      | 0,0875923  | 0,264213   | no  |
| AN2763 | ChrVI_A_nidulans_FGSC_A4:2877690-2880099 | WT_5hasex | WT_veg | OK     | 13,4702  | 8,20788  | -0,71469      | -1,28753      | 0,197911   | 0,451657   | no  |
| AN2764 | ChrVI_A_nidulans_FGSC_A4:2875480-2877384 | WT_5hasex | WT_veg | OK     | 31,048   | 62,345   | 1,00577       | -2,03707      | 0,0416431  | 0,155307   | no  |
| AN2766 | ChrVI_A_nidulans_FGSC_A4:2867801-2870472 | WT_5hasex | WT_veg | OK     | 29,8969  | 71,2458  | 1,25281       | -2,56594      | 0,0102897  | 0,0532668  | no  |
| AN2768 | ChrVI_A_nidulans_FGSC_A4:2860394-2861774 | WT_5hasex | WT_veg | OK     | 72,0697  | 321,766  | 2,15855       | -4,38229      | 1,1744E-05 | 0,00016543 | yes |
| AN2769 | ChrVI_A_nidulans_FGSC_A4:2858133-2860004 | WT_5hasex | WT_veg | OK     | 29,401   | 77,8887  | 1,40555       | -2,86427      | 0,00417973 | 0,0257147  | yes |
| AN2770 | ChrVI_A_nidulans_FGSC_A4:2853522-2855879 | WT_5hasex | WT_veg | OK     | 18,4524  | 28,5014  | 0,627222      | -1,21827      | 0,223122   | 0,484998   | no  |
| AN2771 | ChrVI_A_nidulans_FGSC_A4:2851287-2852658 | WT_5hasex | WT_veg | OK     | 10,6912  | 29,1668  | 1,44791       | -2,45281      | 0,0141746  | 0,0684713  | no  |
| AN2774 | ChrVI_A_nidulans_FGSC_A4:2840707-2841853 | WT_5hasex | WT_veg | OK     | 29,6914  | 66,149   | 1,15567       | -2,16908      | 0,030077   | 0,121593   | no  |
| AN2775 | ChrVI_A_nidulans_FGSC_A4:2838002-2840501 | WT_5hasex | WT_veg | OK     | 83,0193  | 139,919  | 0,753077      | -1,55134      | 0,120821   | 0,329091   | no  |
| AN2776 | ChrVI_A_nidulans_FGSC_A4:2836279-2837277 | WT_5hasex | WT_veg | OK     | 48,5432  | 182,985  | 1,91438       | -3,70698      | 0,00020975 | 0,00207577 | yes |
| AN2777 | ChrVI_A_nidulans_FGSC_A4:2833588-2835352 | WT_5hasex | WT_veg | OK     | 5,74865  | 13,038   | 1,18143       | -1,6775       | 0,0934451  | 0,27612    | no  |
| AN2778 | ChrVI_A_nidulans_FGSC_A4:2832114-2832702 | WT_5hasex | WT_veg | OK     | 3,72018  | 14,2751  | 1,94006       | -2,10629      | 0,0351788  | 0,137038   | no  |
| AN2779 | ChrVI_A_nidulans_FGSC_A4:2829853-2831659 | WT_5hasex | WT_veg | OK     | 7,24176  | 7,46694  | 0,0441764     | -0,0681495    | 0,945667   | 0,979712   | no  |
| AN2780 | ChrVI_A_nidulans_FGSC_A4:2827663-2829580 | WT_5hasex | WT_veg | NOTEST | 0,49237  | 1,76382  | 1,84089       | -1,88078      | 0,0600015  | 1          | no  |
| AN2781 | ChrVI_A_nidulans_FGSC_A4:2825055-2827006 | WT_5hasex | WT_veg | NOTEST | 1,05031  | 0,400008 | -1,39272      | 0,897659      | 0,369367   | 1          | no  |
| AN2782 | ChrVI_A_nidulans_FGSC_A4:2821555-2823057 | WT_5hasex | WT_veg | OK     | 25,3516  | 52,2135  | 1,04235       | -1,97644      | 0,048105   | 0,17293    | no  |
| AN2783 | ChrVI_A_nidulans_FGSC_A4:2819481-2820992 | WT_5hasex | WT_veg | NOTEST | 0,14836  | 0        | -1.79769e+308 | -1.79769e+308 | 0,23809    | 1          | no  |
| AN2784 | ChrVI_A_nidulans_FGSC_A4:2816020-2816732 | WT_5hasex | WT_veg | OK     | 2,13671  | 3,28031  | 0,618439      | -0,541735     | 0,588001   | 0,805891   | no  |
| AN2785 | ChrVI_A_nidulans_FGSC_A4:2813011-2815039 | WT_5hasex | WT_veg | NOTEST | 0,819635 | 0,74023  | -0,147008     | 0,130705      | 0,896009   | 1          | no  |
| AN2786 | ChrVI_A_nidulans_FGSC_A4:2810016-2811356 | WT_5hasex | WT_veg | NOTEST | 1,01543  | 0,635896 | -0,675225     | 0,461709      | 0,64429    | 1          | no  |
| AN2788 | ChrVI_A_nidulans_FGSC_A4:2807779-2808815 | WT_5hasex | WT_veg | NOTEST | 0,303746 | 0        | -1.79769e+308 | -1.79769e+308 | 0,224063   | 1          | no  |
| AN2789 | ChrVI_A_nidulans_FGSC_A4:2805795-2806787 | WT_5hasex | WT_veg | NOTEST | 0        | 0        | 0             | 0             | 1          | 1          | no  |
| AN2790 | ChrVI_A_nidulans_FGSC_A4:2803837-2805091 | WT_5hasex | WT_veg | NOTEST | 0,148038 | 2,07062  | 3,80603       | -2,35775      | 0,018386   | 1          | no  |
| AN2791 | ChrVI_A_nidulans_FGSC_A4:2801353-2801820 | WT_5hasex | WT_veg | NOTEST | 0        | 0        | 0             | 0             | 1          | 1          | no  |
| AN2792 | ChrVI_A_nidulans_FGSC_A4:2799055-2800163 | WT_5hasex | WT_veg | OK     | 79,0685  | 327,431  | 2,05002       | -4,24736      | 2,1631E-05 | 0,00028573 | yes |
| AN2794 | ChrVI_A_nidulans_FGSC_A4:2792211-2794114 | WT_5hasex | WT_veg | OK     | 184,972  | 263,764  | 0,511941      | -1,0277       | 0,304089   | 0,580104   | no  |
| AN2796 | ChrVI_A_nidulans_FGSC_A4:2786149-2788367 | WT_5hasex | WT_veg | OK     | 7,2501   | 3,78294  | -0,938493     | 1,48879       | 0,136542   | 0,356746   | no  |
| AN2797 | ChrVI_A_nidulans_FGSC_A4:2780560-2785594 | WT_5hasex | WT_veg | OK     | 2,73043  | 9,06553  | 1,73126       | -2,89379      | 0,00380621 | 0,0238381  | yes |
| AN2798 | ChrVI_A_nidulans_FGSC_A4:2779442-2780437 | WT_5hasex | WT_veg | OK     | 4,51498  | 13,3168  | 1,56046       | -1,99797      | 0,0457194  | 0,166513   | no  |
| AN2799 | ChrVI_A_nidulans_FGSC_A4:2774983-2778779 | WT_5hasex | WT_veg | NOTEST | 0,103544 | 0,482759 | 2,22106       | -1,14626      | 0,251686   | 1          | no  |
| AN2800 | ChrVI_A_nidulans_FGSC_A4:2772376-2773907 | WT_5hasex | WT_veg | OK     | 4,78527  | 9,17029  | 0,938369      | -1,25838      | 0,208254   | 0,465688   | no  |
| AN2801 | ChrVI_A_nidulans_FGSC_A4:2770810-2772028 | WT_5hasex | WT_veg | OK     | 40,6851  | 249,576  | 2,61691       | -4,95496      | 7,2345E-07 | 1,3766E-05 | yes |
| AN2802 | ChrVI_A_nidulans_FGSC_A4:2768339-2768952 | WT_5hasex | WT_veg | NOTEST | 0        | 0        | 0             | 0             | 1          | 1          | no  |
| AN2803 | ChrVI_A_nidulans_FGSC_A4:2766284-2766842 | WT_5hasex | WT_veg | NOTEST | 0        | 0        | 0             | 0             | 1          | 1          | no  |
| AN2804 | ChrVI_A_nidulans_FGSC_A4:2763464-2765165 | WT_5hasex | WT_veg | NOTEST | 0,180352 | 0,488227 | 1,43674       | -0,791167     | 0,428846   | 1          | no  |
| AN2805 | ChrVI_A_nidulans_FGSC_A4:2760636-2763345 | WT_5hasex | WT_veg | NOTEST | 0        | 0        | 0             | 0             | 1          | 1          | no  |
| AN2806 | ChrVI_A_nidulans_FGSC_A4:2757420-2758959 | WT_5hasex | WT_veg | NOTEST | 0        | 0        | 0             | 0             | 1          | 1          | no  |
| AN2807 | ChrVI_A_nidulans_FGSC_A4:2757420-2758959 | WT_5hasex | WT_veg | NOTEST | 0        | 1,04715  | 1.79769e+308  | 1.79769e+308  | 0,0716995  | 1          | no  |
| AN2808 | ChrVI_A_nidulans_FGSC_A4:2754259-2755888 | WT_5hasex | WT_veg | OK     | 0,214378 | 11,3192  | 5,72247       | -4,22764      | 2,3615E-05 | 0,00030899 | yes |
| AN2809 | ChrVI_A_nidulans_FGSC_A4:2750998-2751967 | WT_5hasex | WT_veg | NOTEST | 1,48423  | 2,54956  | 0,780533      | -0,76772      | 0,442653   | 1          | no  |
| AN2810 | ChrVI_A_nidulans_FGSC_A4:2748564-2750905 | WT_5hasex | WT_veg | OK     | 1,11665  | 4,95026  | 2,14833       | -2,78407      | 0,00536815 | 0,0314585  | yes |
| AN2811 | ChrVI_A_nidulans_FGSC_A4:2741799-2743193 | WT_5hasex | WT_veg | NOTEST | 1,10286  | 0,992063 | -0,152743     | 0,102816      | 0,918109   | 1          | no  |
| AN2813 | ChrVI_A_nidulans_FGSC_A4:2735389-2736298 | WT_5hasex | WT_veg | NOTEST | 1,48891  | 3,28839  | 1,14312       | -1,14502      | 0,252203   | 1          | no  |
| AN2814 | ChrVI_A_nidulans_FGSC_A4:2731204-2733291 | WT_5hasex | WT_veg | NOTEST | 0,429394 | 0,854502 | 0,992782      | -0,812084     | 0,416744   | 1          | no  |
| AN2815 | ChrVI_A_nidulans_FGSC_A4:2722201-2724085 | WT_5hasex | WT_veg | OK     | 221,143  | 2027,52  | 3,19666       | -5,84266      | 5,1375E-09 | 1,5734E-07 | yes |
| AN2817 | ChrVI_A_nidulans_FGSC_A4:2719256-2719770 | WT_5hasex | WT_veg | OK     | 4,074    | 30,7157  | 2,91446       | -3,25624      | 0,00112896 | 0,00868339 | yes |
| AN2818 | ChrVI_A_nidulans_FGSC_A4:2712425-2714545 | WT_5hasex | WT_veg | OK     | 12,243   | 1,51153  | -3,01787      | 3,78626       | 0,00015293 | 0,00157971 | yes |
| AN2819 | ChrVI_A_nidulans_FGSC_A4:2700868-2701501 | WT_5hasex | WT_veg | NOTEST | 0        | 0        | 0             | 0             | 1          | 1          | no  |
| AN2820 | ChrVI_A_nidulans_FGSC_A4:2698620-2699514 | WT_5hasex | WT_veg | NOTEST | 0        | 0,938081 | 1.79769e+308  | 1.79769e+308  | 0,123323   | 1          | no  |
| AN2821 | ChrVI_A_nidulans_FGSC_A4:2693326-2695157 | WT_5hasex | WT_veg | NOTEST | 0,903248 | 1,80557  | 0,99926       | -1,00572      | 0,31455    | 1          | no  |
| AN2822 | ChrVI_A_nidulans_FGSC_A4:2687815-2689547 | WT_5hasex | WT_veg | OK     | 59,6204  | 678,153  | 3,50773       | -7,11461      | 1,1222E-12 | 6,2827E-11 | yes |

## Supplementary table 1

|        |                                          |           |        |        |          |          |               |               |            |            |      |
|--------|------------------------------------------|-----------|--------|--------|----------|----------|---------------|---------------|------------|------------|------|
| AN2823 | ChrVI_A_nidulans_FGSC_A4:2686463-2686987 | WT_5hasex | WT_veg | OK     | 23,3181  | 160,959  | 2,78718       | -4,3406       | 1,421E-05  | 0,00019709 | yes  |
| AN2826 | ChrVI_A_nidulans_FGSC_A4:2676364-2677558 | WT_5hasex | WT_veg | OK     | 10,5476  | 7,87605  | -0,421371     | 0,618018      | 0,536563   | 0,773393   | no   |
| AN2827 | ChrVI_A_nidulans_FGSC_A4:2671288-2674840 | WT_5hasex | WT_veg | OK     | 4,27799  | 4,154    | -0,0424295    | 0,0690864     | 0,944921   | 0,979356   | no   |
| AN2830 | ChrVI_A_nidulans_FGSC_A4:2661207-2662254 | WT_5hasex | WT_veg | NOTEST | 1,51875  | 2,1537   | 0,503932      | -0,492815     | 0,622143   |            | 1 no |
| AN2831 | ChrVI_A_nidulans_FGSC_A4:2657040-2658645 | WT_5hasex | WT_veg | OK     | 8,37455  | 37,5397  | 2,16433       | -3,27729      | 0,0010481  | 0,00816696 | yes  |
| AN2832 | ChrVI_A_nidulans_FGSC_A4:2653961-2654976 | WT_5hasex | WT_veg | OK     | 1,20936  | 11,3373  | 3,22876       | -3,19737      | 0,00138687 | 0,0102851  | yes  |
| AN2834 | ChrVI_A_nidulans_FGSC_A4:2648850-2649603 | WT_5hasex | WT_veg | NOTEST | 0        | 0        | 0             | 0             | 1          |            | 1 no |
| AN2835 | ChrVI_A_nidulans_FGSC_A4:2645664-2647529 | WT_5hasex | WT_veg | OK     | 5,60849  | 13,8975  | 1,30914       | -2,03912      | 0,0414377  | 0,154704   | no   |
| AN2836 | ChrVI_A_nidulans_FGSC_A4:2642791-2644088 | WT_5hasex | WT_veg | OK     | 7,62897  | 13,2354  | 0,794839      | -1,17096      | 0,241616   | 0,50797    | no   |
| AN2837 | ChrVI_A_nidulans_FGSC_A4:2640877-2642300 | WT_5hasex | WT_veg | OK     | 8,50859  | 27,0316  | 1,66766       | -2,72629      | 0,00640504 | 0,0364585  | yes  |
| AN2838 | ChrVI_A_nidulans_FGSC_A4:2638511-2639363 | WT_5hasex | WT_veg | NOTEST | 0,522201 | 1,22876  | 1,23452       | -0,75656      | 0,449314   |            | 1 no |
| AN2839 | ChrVI_A_nidulans_FGSC_A4:2633591-2635689 | WT_5hasex | WT_veg | NOTEST | 0,271087 | 2,01819  | 2,89624       | -2,65848      | 0,00784941 |            | 1 no |
| AN2841 | ChrVI_A_nidulans_FGSC_A4:2629127-2630734 | WT_5hasex | WT_veg | OK     | 12,5751  | 0,540246 | -4,54081      | 3,37674       | 0,0007335  | 0,00602741 | yes  |
| AN2842 | ChrVI_A_nidulans_FGSC_A4:2626821-2627688 | WT_5hasex | WT_veg | NOTEST | 0,676832 | 1,87843  | 1,47266       | -0,810948     | 0,417396   |            | 1 no |
| AN2843 | ChrVI_A_nidulans_FGSC_A4:2624477-2624909 | WT_5hasex | WT_veg | OK     | 2,05279  | 0        | -1.79769e+308 | -1.79769e+308 | 0,0341325  | 0,134157   | no   |
| AN2844 | ChrVI_A_nidulans_FGSC_A4:2622546-2623195 | WT_5hasex | WT_veg | OK     | 817,823  | 61,2636  | -3,73869      | 7,14324       | 9,1149E-13 | 5,147E-11  | yes  |
| AN2845 | ChrVI_A_nidulans_FGSC_A4:2618846-2619238 | WT_5hasex | WT_veg | OK     | 27,9748  | 38,0852  | 0,4451        | -0,673442     | 0,500666   | 0,750229   | no   |
| AN2847 | ChrVI_A_nidulans_FGSC_A4:2615519-2616675 | WT_5hasex | WT_veg | OK     | 50,0708  | 81,9914  | 0,711503      | -1,36277      | 0,172954   | 0,415665   | no   |
| AN2848 | ChrVI_A_nidulans_FGSC_A4:2614310-2615066 | WT_5hasex | WT_veg | OK     | 116,784  | 389,478  | 1,73771       | -3,53081      | 0,00041429 | 0,00370468 | yes  |
| AN2850 | ChrVI_A_nidulans_FGSC_A4:2608042-2610680 | WT_5hasex | WT_veg | OK     | 6,3935   | 9,21651  | 0,527615      | -0,917862     | 0,358691   | 0,633687   | no   |
| AN2851 | ChrVI_A_nidulans_FGSC_A4:2605745-2606707 | WT_5hasex | WT_veg | OK     | 38,177   | 36,1584  | -0,0783706    | 0,149884      | 0,880856   | 0,95479    | no   |
| AN2852 | ChrVI_A_nidulans_FGSC_A4:2602370-2605570 | WT_5hasex | WT_veg | OK     | 24,8619  | 81,1195  | 1,70611       | -3,57727      | 0,0003472  | 0,00318587 | yes  |
| AN2853 | ChrVI_A_nidulans_FGSC_A4:2599034-2599808 | WT_5hasex | WT_veg | OK     | 28,3591  | 40,5549  | 0,516062      | -0,924798     | 0,355071   | 0,630598   | no   |
| AN2854 | ChrVI_A_nidulans_FGSC_A4:2596166-2598495 | WT_5hasex | WT_veg | OK     | 27,8165  | 98,0237  | 1,81719       | -3,74025      | 0,00018383 | 0,00185362 | yes  |
| AN2856 | ChrVI_A_nidulans_FGSC_A4:2588872-2590661 | WT_5hasex | WT_veg | OK     | 6,23299  | 4,15793  | -0,58406      | 0,833875      | 0,404351   | 0,675492   | no   |
| AN2857 | ChrVI_A_nidulans_FGSC_A4:2585666-2587795 | WT_5hasex | WT_veg | OK     | 26,7719  | 43,6944  | 0,706731      | -1,44031      | 0,14978    | 0,378603   | no   |
| AN2858 | ChrVI_A_nidulans_FGSC_A4:2583847-2585285 | WT_5hasex | WT_veg | OK     | 9,38788  | 12,8123  | 0,448663      | -0,696008     | 0,486424   | 0,740266   | no   |
| AN2859 | ChrVI_A_nidulans_FGSC_A4:2582295-2583338 | WT_5hasex | WT_veg | OK     | 8,38356  | 34,7269  | 2,05042       | -3,04708      | 0,00231078 | 0,0157409  | yes  |
| AN2860 | ChrVI_A_nidulans_FGSC_A4:2580313-2581623 | WT_5hasex | WT_veg | OK     | 14,1545  | 41,426   | 1,54928       | -2,61251      | 0,00898809 | 0,0479286  | yes  |
| AN2861 | ChrVI_A_nidulans_FGSC_A4:2577409-2579430 | WT_5hasex | WT_veg | OK     | 14,1408  | 194,418  | 3,78123       | -7,21096      | 5,5556E-13 | 3,2275E-11 | yes  |
| AN2862 | ChrVI_A_nidulans_FGSC_A4:2575494-2577007 | WT_5hasex | WT_veg | OK     | 136,556  | 334,736  | 1,29353       | -2,65992      | 0,00781581 | 0,0427833  | yes  |
| AN2863 | ChrVI_A_nidulans_FGSC_A4:2572117-2574173 | WT_5hasex | WT_veg | OK     | 23,4142  | 33,6064  | 0,521352      | -1,04726      | 0,29498    | 0,569743   | no   |
| AN2864 | ChrVI_A_nidulans_FGSC_A4:2570112-2571649 | WT_5hasex | WT_veg | NOTEST | 1,39735  | 2,43316  | 0,800141      | -0,904026     | 0,365982   |            | 1 no |
| AN2865 | ChrVI_A_nidulans_FGSC_A4:2567220-2568558 | WT_5hasex | WT_veg | OK     | 35,6405  | 54,0444  | 0,600628      | -1,21749      | 0,223416   | 0,485364   | no   |
| AN2866 | ChrVI_A_nidulans_FGSC_A4:2564713-2566393 | WT_5hasex | WT_veg | OK     | 16,031   | 43,7041  | 1,4469        | -2,59217      | 0,00953738 | 0,0501835  | no   |
| AN2869 | ChrVI_A_nidulans_FGSC_A4:2552313-2554558 | WT_5hasex | WT_veg | NOTEST | 1,29371  | 1,69665  | 0,391179      | -0,433432     | 0,664701   |            | 1 no |
| AN2870 | ChrVI_A_nidulans_FGSC_A4:2548042-2549413 | WT_5hasex | WT_veg | OK     | 18,2101  | 10,9422  | -0,734841     | 1,29165       | 0,19648    | 0,449486   | no   |
| AN2872 | ChrVI_A_nidulans_FGSC_A4:2540800-2543504 | WT_5hasex | WT_veg | OK     | 71,5916  | 82,1869  | 0,199118      | -0,411943     | 0,680381   | 0,858873   | no   |
| AN2874 | ChrVI_A_nidulans_FGSC_A4:2529951-2534538 | WT_5hasex | WT_veg | OK     | 1,91274  | 1,00702  | -0,925551     | 1,22421       | 0,220875   | 0,48248    | no   |
| AN2876 | ChrVI_A_nidulans_FGSC_A4:2522989-2525126 | WT_5hasex | WT_veg | OK     | 13,8396  | 25,0191  | 0,854227      | -1,34768      | 0,177763   | 0,422799   | no   |
| AN2877 | ChrVI_A_nidulans_FGSC_A4:2520822-2522243 | WT_5hasex | WT_veg | OK     | 98,2683  | 373,719  | 1,92716       | -3,90484      | 9,4289E-05 | 0,00104173 | yes  |
| AN2878 | ChrVI_A_nidulans_FGSC_A4:2518748-2520491 | WT_5hasex | WT_veg | OK     | 20,2667  | 39,3333  | 0,956636      | -1,75918      | 0,0785461  | 0,244693   | no   |
| AN2879 | ChrVI_A_nidulans_FGSC_A4:2516241-2518129 | WT_5hasex | WT_veg | OK     | 16,4593  | 60,3363  | 1,87412       | -3,52423      | 0,00042472 | 0,0037831  | yes  |
| AN2880 | ChrVI_A_nidulans_FGSC_A4:2511942-2514883 | WT_5hasex | WT_veg | OK     | 42,6974  | 177,871  | 2,05861       | -4,24564      | 2,1797E-05 | 0,00028749 | yes  |
| AN2881 | ChrVI_A_nidulans_FGSC_A4:2509071-2510521 | WT_5hasex | WT_veg | OK     | 74,5272  | 108,304  | 0,539251      | -1,11673      | 0,26411    | 0,535041   | no   |
| AN2882 | ChrVI_A_nidulans_FGSC_A4:2507705-2509018 | WT_5hasex | WT_veg | OK     | 44,9479  | 27,4347  | -0,712251     | 1,42754       | 0,153425   | 0,384734   | no   |
| AN2883 | ChrVI_A_nidulans_FGSC_A4:2506432-2507509 | WT_5hasex | WT_veg | OK     | 7,01547  | 12,2487  | 0,804017      | -1,21615      | 0,223928   | 0,485931   | no   |
| AN2884 | ChrVI_A_nidulans_FGSC_A4:2504089-2506018 | WT_5hasex | WT_veg | OK     | 21,3322  | 21,3485  | 0,00110438    | -0,00202533   | 0,998384   | 0,999341   | no   |
| AN2885 | ChrVI_A_nidulans_FGSC_A4:2501338-2502446 | WT_5hasex | WT_veg | OK     | 486,028  | 1078     | 1,14925       | -2,17455      | 0,0296642  | 0,120324   | no   |
| AN2887 | ChrVI_A_nidulans_FGSC_A4:2493865-2497990 | WT_5hasex | WT_veg | OK     | 11,686   | 14,0307  | 0,263807      | -0,525291     | 0,599381   | 0,812864   | no   |
| AN2888 | ChrVI_A_nidulans_FGSC_A4:2491831-2493193 | WT_5hasex | WT_veg | OK     | 301,514  | 84,7505  | -1,83093      | 3,29497       | 0,00098434 | 0,00774725 | yes  |
| AN2889 | ChrVI_A_nidulans_FGSC_A4:2488822-2491354 | WT_5hasex | WT_veg | OK     | 12,228   | 9,62571  | -0,345226     | 0,660961      | 0,508637   | 0,755316   | no   |
| AN2890 | ChrVI_A_nidulans_FGSC_A4:2486441-2487992 | WT_5hasex | WT_veg | OK     | 3,12328  | 1,23357  | -1,34023      | 1,39992       | 0,161538   | 0,397394   | no   |

## Supplementary table 1

|        |                                          |           |        |        |          |          |           |           |            |            |     |
|--------|------------------------------------------|-----------|--------|--------|----------|----------|-----------|-----------|------------|------------|-----|
| AN2891 | ChrVI_A_nidulans_FGSC_A4:2484744-2485810 | WT_5hasex | WT_veg | OK     | 10,682   | 58,7943  | 2,4605    | -3,46545  | 0,00052935 | 0,00456456 | yes |
| AN2892 | ChrVI_A_nidulans_FGSC_A4:2482293-2484073 | WT_5hasex | WT_veg | OK     | 4,67365  | 3,20604  | -0,543757 | 0,745503  | 0,455967   | 0,717068   | no  |
| AN2894 | ChrVI_A_nidulans_FGSC_A4:2478645-2479271 | WT_5hasex | WT_veg | OK     | 196,376  | 2017,86  | 3,36114   | -6,90212  | 5,1232E-12 | 2,5814E-10 | yes |
| AN2895 | ChrVI_A_nidulans_FGSC_A4:2472967-2477985 | WT_5hasex | WT_veg | NOTEST | 1,65589  | 3,77311  | 1,18815   | -1,76705  | 0,0772205  | 1          | no  |
| AN2896 | ChrVI_A_nidulans_FGSC_A4:2468847-2470033 | WT_5hasex | WT_veg | OK     | 76,1473  | 111,637  | 0,551952  | -1,13782  | 0,255198   | 0,524558   | no  |
| AN2897 | ChrVI_A_nidulans_FGSC_A4:2465356-2468575 | WT_5hasex | WT_veg | OK     | 9,68678  | 52,6254  | 2,44167   | -4,68407  | 2,8123E-06 | 4,6376E-05 | yes |
| AN2898 | ChrVI_A_nidulans_FGSC_A4:2462037-2464759 | WT_5hasex | WT_veg | OK     | 5,74995  | 18,4774  | 1,68414   | -2,83421  | 0,00459386 | 0,0277848  | yes |
| AN2899 | ChrVI_A_nidulans_FGSC_A4:2459143-2460779 | WT_5hasex | WT_veg | OK     | 38,2613  | 62,8882  | 0,716904  | -1,27002  | 0,204076   | 0,460233   | no  |
| AN2900 | ChrVI_A_nidulans_FGSC_A4:2455692-2457663 | WT_5hasex | WT_veg | OK     | 24,2152  | 25,2691  | 0,0614641 | -0,122134 | 0,902793   | 0,962602   | no  |
| AN2903 | ChrVI_A_nidulans_FGSC_A4:2446775-2448475 | WT_5hasex | WT_veg | OK     | 717,198  | 926,666  | 0,369679  | -0,655338 | 0,51225    | 0,757614   | no  |
| AN2904 | ChrVI_A_nidulans_FGSC_A4:2444263-2446102 | WT_5hasex | WT_veg | OK     | 186,532  | 285,308  | 0,613099  | -1,22626  | 0,220099   | 0,481451   | no  |
| AN2905 | ChrVI_A_nidulans_FGSC_A4:2438435-2441631 | WT_5hasex | WT_veg | OK     | 30,067   | 47,3637  | 0,655604  | -1,33048  | 0,183361   | 0,431164   | no  |
| AN2906 | ChrVI_A_nidulans_FGSC_A4:2436892-2437665 | WT_5hasex | WT_veg | OK     | 93,7926  | 176,566  | 0,912659  | -1,85126  | 0,0641316  | 0,211813   | no  |
| AN2907 | ChrVI_A_nidulans_FGSC_A4:2435135-2436554 | WT_5hasex | WT_veg | OK     | 91,6431  | 245,735  | 1,423     | -2,96805  | 0,00299696 | 0,0195283  | yes |
| AN2909 | ChrVI_A_nidulans_FGSC_A4:2429606-2431104 | WT_5hasex | WT_veg | OK     | 97,9519  | 235,477  | 1,26544   | -2,62583  | 0,00864372 | 0,0464039  | yes |
| AN2912 | ChrVI_A_nidulans_FGSC_A4:2417460-2418561 | WT_5hasex | WT_veg | OK     | 504,642  | 193,12   | -1,38576  | 2,21788   | 0,0265632  | 0,110491   | no  |
| AN2913 | ChrVI_A_nidulans_FGSC_A4:2414338-2415491 | WT_5hasex | WT_veg | OK     | 46,0621  | 52,4736  | 0,188013  | -0,376544 | 0,706512   | 0,873108   | no  |
| AN2914 | ChrVI_A_nidulans_FGSC_A4:2410414-2412081 | WT_5hasex | WT_veg | OK     | 96,103   | 157,974  | 0,717036  | -1,45674  | 0,145189   | 0,371243   | no  |
| AN2915 | ChrVI_A_nidulans_FGSC_A4:2408704-2410029 | WT_5hasex | WT_veg | NOTEST | 0,149995 | 0,635896 | 2,08388   | -0,876607 | 0,3807     | 1          | no  |
| AN2916 | ChrVI_A_nidulans_FGSC_A4:2405123-2407480 | WT_5hasex | WT_veg | OK     | 104,544  | 254,105  | 1,28131   | -2,60649  | 0,00914757 | 0,0485517  | yes |
| AN2917 | ChrVI_A_nidulans_FGSC_A4:2402925-2404654 | WT_5hasex | WT_veg | OK     | 161,722  | 238,711  | 0,561747  | -1,13716  | 0,25547    | 0,524805   | no  |
| AN2920 | ChrVI_A_nidulans_FGSC_A4:2395427-2396375 | WT_5hasex | WT_veg | OK     | 25,0318  | 68,3995  | 1,45022   | -2,48717  | 0,0128765  | 0,0635961  | no  |
| AN2921 | ChrVI_A_nidulans_FGSC_A4:2389991-2391506 | WT_5hasex | WT_veg | OK     | 3,1041   | 2,57438  | -0,26995  | 0,326971  | 0,74369    | 0,892156   | no  |
| AN2922 | ChrVI_A_nidulans_FGSC_A4:2387751-2388615 | WT_5hasex | WT_veg | OK     | 10,3969  | 18,1749  | 0,805802  | -1,18238  | 0,237055   | 0,502473   | no  |
| AN2923 | ChrVI_A_nidulans_FGSC_A4:2385362-2386739 | WT_5hasex | WT_veg | OK     | 11,476   | 22,9634  | 1,00072   | -1,58065  | 0,113959   | 0,316547   | no  |
| AN2924 | ChrVI_A_nidulans_FGSC_A4:2380864-2384412 | WT_5hasex | WT_veg | OK     | 9,60139  | 5,48562  | -0,807589 | 1,29454   | 0,19548    | 0,448164   | no  |
| AN2927 | ChrVI_A_nidulans_FGSC_A4:2367805-2370292 | WT_5hasex | WT_veg | OK     | 20,7688  | 30,6541  | 0,561665  | -1,13809  | 0,255082   | 0,524395   | no  |
| AN2928 | ChrVI_A_nidulans_FGSC_A4:2361389-2364114 | WT_5hasex | WT_veg | OK     | 428,994  | 661,374  | 0,62451   | -1,08653  | 0,277247   | 0,550522   | no  |
| AN2930 | ChrVI_A_nidulans_FGSC_A4:2355716-2356526 | WT_5hasex | WT_veg | OK     | 171,267  | 343,034  | 1,0021    | -2,07013  | 0,0384402  | 0,146519   | no  |
| AN2931 | ChrVI_A_nidulans_FGSC_A4:2354166-2355629 | WT_5hasex | WT_veg | OK     | 4,20214  | 8,39193  | 0,997877  | -1,42797  | 0,153301   | 0,384606   | no  |
| AN2932 | ChrVI_A_nidulans_FGSC_A4:2351597-2354019 | WT_5hasex | WT_veg | OK     | 454,596  | 1677,3   | 1,88348   | -3,03988  | 0,0023667  | 0,0160668  | yes |
| AN2933 | ChrVI_A_nidulans_FGSC_A4:2349633-2351190 | WT_5hasex | WT_veg | OK     | 51,52    | 107,421  | 1,06007   | -2,07924  | 0,0375953  | 0,144043   | no  |
| AN2934 | ChrVI_A_nidulans_FGSC_A4:2348622-2349534 | WT_5hasex | WT_veg | OK     | 89,2173  | 92,7958  | 0,056736  | -0,113264 | 0,909821   | 0,965882   | no  |
| AN2935 | ChrVI_A_nidulans_FGSC_A4:2347278-2348211 | WT_5hasex | WT_veg | OK     | 13,5936  | 23,7251  | 0,80349   | -1,28026  | 0,200454   | 0,455161   | no  |
| AN2936 | ChrVI_A_nidulans_FGSC_A4:2343392-2346986 | WT_5hasex | WT_veg | OK     | 41,6907  | 80,9125  | 0,956637  | -1,96449  | 0,0494731  | 0,176264   | no  |
| AN2937 | ChrVI_A_nidulans_FGSC_A4:2337902-2339615 | WT_5hasex | WT_veg | OK     | 17,0821  | 39,9092  | 1,22424   | -2,04724  | 0,0406341  | 0,152573   | no  |
| AN2938 | ChrVI_A_nidulans_FGSC_A4:2334836-2336675 | WT_5hasex | WT_veg | OK     | 9,60478  | 20,6206  | 1,10226   | -1,71771  | 0,0858501  | 0,260659   | no  |
| AN2939 | ChrVI_A_nidulans_FGSC_A4:2332366-2334469 | WT_5hasex | WT_veg | OK     | 131,964  | 209,097  | 0,664022  | -1,29851  | 0,194111   | 0,446111   | no  |
| AN2940 | ChrVI_A_nidulans_FGSC_A4:2328288-2330519 | WT_5hasex | WT_veg | OK     | 46,877   | 89,9809  | 0,94074   | -1,94838  | 0,0513691  | 0,180884   | no  |
| AN2941 | ChrVI_A_nidulans_FGSC_A4:2325927-2327405 | WT_5hasex | WT_veg | OK     | 49,1382  | 115,281  | 1,23024   | -2,03925  | 0,0414252  | 0,154668   | no  |
| AN2942 | ChrVI_A_nidulans_FGSC_A4:2319102-2320641 | WT_5hasex | WT_veg | OK     | 104,511  | 51,3222  | -1,026    | 1,81961   | 0,0688191  | 0,22276    | no  |
| AN2947 | ChrVI_A_nidulans_FGSC_A4:2296436-2301857 | WT_5hasex | WT_veg | OK     | 34,6736  | 37,1124  | 0,098062  | -0,193322 | 0,846706   | 0,939474   | no  |
| AN2948 | ChrVI_A_nidulans_FGSC_A4:2294988-2295843 | WT_5hasex | WT_veg | OK     | 75,1438  | 139,416  | 0,891665  | -1,77719  | 0,0755366  | 0,237991   | no  |
| AN2949 | ChrVI_A_nidulans_FGSC_A4:2293968-2294929 | WT_5hasex | WT_veg | OK     | 49,1698  | 109,56   | 1,15588   | -2,26052  | 0,0237887  | 0,101542   | no  |
| AN2950 | ChrVI_A_nidulans_FGSC_A4:2288680-2289594 | WT_5hasex | WT_veg | OK     | 4,41869  | 13,0513  | 1,5625    | -1,86717  | 0,0618782  | 0,206479   | no  |
| AN2951 | ChrVI_A_nidulans_FGSC_A4:2285739-2287339 | WT_5hasex | WT_veg | OK     | 30,3925  | 101,336  | 1,73735   | -3,50423  | 0,00045793 | 0,00404049 | yes |
| AN2952 | ChrVI_A_nidulans_FGSC_A4:2283900-2285182 | WT_5hasex | WT_veg | OK     | 28,1647  | 47,6135  | 0,75748   | -1,35479  | 0,175483   | 0,149846   | no  |
| AN2953 | ChrVI_A_nidulans_FGSC_A4:2278954-2280298 | WT_5hasex | WT_veg | OK     | 119,868  | 404,885  | 1,75607   | -3,57497  | 0,00035027 | 0,00321061 | yes |
| AN2954 | ChrVI_A_nidulans_FGSC_A4:2273441-2276283 | WT_5hasex | WT_veg | OK     | 18,4228  | 136,309  | 2,88731   | -5,46253  | 4,694E-08  | 1,1736E-06 | yes |
| AN2955 | ChrVI_A_nidulans_FGSC_A4:2262553-2271400 | WT_5hasex | WT_veg | OK     | 7,56841  | 30,215   | 1,9972    | -4,15108  | 3,3091E-05 | 0,00041804 | yes |
| AN2956 | ChrVI_A_nidulans_FGSC_A4:2259423-2261872 | WT_5hasex | WT_veg | NOTEST | 1,31126  | 2,95318  | 1,17131   | -1,391    | 0,164224   | 1          | no  |
| AN2957 | ChrVI_A_nidulans_FGSC_A4:2257487-2259253 | WT_5hasex | WT_veg | OK     | 2,62555  | 5,46602  | 1,05787   | -1,32723  | 0,184434   | 0,432793   | no  |
| AN2958 | ChrVI_A_nidulans_FGSC_A4:2254641-2256654 | WT_5hasex | WT_veg | OK     | 3,22101  | 8,10194  | 1,33075   | -1,88417  | 0,0595418  | 0,201207   | no  |



## Supplementary table 1

|        |                                          |           |        |        |          |         |               |               |            |            |     |
|--------|------------------------------------------|-----------|--------|--------|----------|---------|---------------|---------------|------------|------------|-----|
| AN2959 | ChrVI_A_nidulans_FGSC_A4:2247674-2249574 | WT_5hasex | WT_veg | OK     | 3,26589  | 2,89939 | -0,171727     | 0,226168      | 0,82107    | 0,928419   | no  |
| AN2960 | ChrVI_A_nidulans_FGSC_A4:2244816-2246167 | WT_5hasex | WT_veg | OK     | 8,79047  | 10,1388 | 0,205878      | -0,307274     | 0,758635   | 0,900226   | no  |
| AN2961 | ChrVI_A_nidulans_FGSC_A4:2241535-2243436 | WT_5hasex | WT_veg | OK     | 7,24397  | 19,04   | 1,39418       | -2,24118      | 0,0250144  | 0,105489   | no  |
| AN2963 | ChrVI_A_nidulans_FGSC_A4:2232097-2236278 | WT_5hasex | WT_veg | OK     | 27,531   | 47,166  | 0,776689      | -1,60177      | 0,109206   | 0,307883   | no  |
| AN2965 | ChrVI_A_nidulans_FGSC_A4:2226344-2228305 | WT_5hasex | WT_veg | OK     | 15,5534  | 34,7022 | 1,15779       | -2,16217      | 0,0306051  | 0,123215   | no  |
| AN2967 | ChrVI_A_nidulans_FGSC_A4:2219923-2221261 | WT_5hasex | WT_veg | OK     | 12,2583  | 26,1976 | 1,09568       | -1,86093      | 0,0627534  | 0,208574   | no  |
| AN2969 | ChrVI_A_nidulans_FGSC_A4:2213564-2214913 | WT_5hasex | WT_veg | OK     | 28,0129  | 57,9932 | 1,04979       | -1,99382      | 0,046172   | 0,167812   | no  |
| AN2970 | ChrVI_A_nidulans_FGSC_A4:2211268-2212610 | WT_5hasex | WT_veg | OK     | 78,5086  | 179,715 | 1,19479       | -2,47448      | 0,0133432  | 0,0653895  | no  |
| AN2971 | ChrVI_A_nidulans_FGSC_A4:2209875-2211171 | WT_5hasex | WT_veg | OK     | 10,8786  | 16,3343 | 0,586412      | -0,988611     | 0,322854   | 0,599149   | no  |
| AN2972 | ChrVI_A_nidulans_FGSC_A4:2208562-2209694 | WT_5hasex | WT_veg | OK     | 49,0148  | 56,4901 | 0,204781      | -0,397533     | 0,690974   | 0,024781   | no  |
| AN2973 | ChrVI_A_nidulans_FGSC_A4:2204988-2208312 | WT_5hasex | WT_veg | OK     | 5,49614  | 23,1186 | 2,07257       | -3,64769      | 0,00026461 | 0,00253677 | yes |
| AN2974 | ChrVI_A_nidulans_FGSC_A4:2201579-2203533 | WT_5hasex | WT_veg | OK     | 13,989   | 14,1305 | 0,0145258     | -0,024662     | 0,980325   | 0,993176   | no  |
| AN2975 | ChrVI_A_nidulans_FGSC_A4:2198718-2199237 | WT_5hasex | WT_veg | OK     | 66,007   | 77,3688 | 0,229133      | -0,399121     | 0,689804   | 0,863514   | no  |
| AN2976 | ChrVI_A_nidulans_FGSC_A4:2197822-2198416 | WT_5hasex | WT_veg | OK     | 117,188  | 307,231 | 1,3905        | -2,80756      | 0,00499177 | 0,0297012  | yes |
| AN2977 | ChrVI_A_nidulans_FGSC_A4:2195519-2197475 | WT_5hasex | WT_veg | OK     | 406,318  | 1821,06 | 2,1641        | -3,87428      | 0,00010694 | 0,00116386 | yes |
| AN2978 | ChrVI_A_nidulans_FGSC_A4:2194354-2195360 | WT_5hasex | WT_veg | OK     | 516,502  | 1648,9  | 1,67465       | -2,89878      | 0,00374612 | 0,023526   | yes |
| AN2979 | ChrVI_A_nidulans_FGSC_A4:2192123-2194201 | WT_5hasex | WT_veg | OK     | 192,322  | 641,061 | 1,73694       | -3,3754       | 0,00073707 | 0,00605109 | yes |
| AN2980 | ChrVI_A_nidulans_FGSC_A4:2188399-2189607 | WT_5hasex | WT_veg | OK     | 2161,95  | 3193,1  | 0,562627      | -0,888611     | 0,374212   | 0,648891   | no  |
| AN2982 | ChrVI_A_nidulans_FGSC_A4:2180809-2182943 | WT_5hasex | WT_veg | OK     | 19,1006  | 20,6843 | 0,11492       | -0,21706      | 0,828162   | 0,931555   | no  |
| AN2985 | ChrVI_A_nidulans_FGSC_A4:2169365-2171604 | WT_5hasex | WT_veg | OK     | 15,1739  | 199,882 | 3,71948       | -7,10456      | 1,207E-12  | 6,7279E-11 | yes |
| AN2986 | ChrVI_A_nidulans_FGSC_A4:2167524-2168648 | WT_5hasex | WT_veg | OK     | 40,6748  | 102,655 | 1,33559       | -2,58345      | 0,00978177 | 0,0511868  | no  |
| AN2987 | ChrVI_A_nidulans_FGSC_A4:2165815-2166877 | WT_5hasex | WT_veg | OK     | 9,14536  | 9,79442 | 0,0989195     | -0,144496     | 0,885108   | 0,956347   | no  |
| AN2988 | ChrVI_A_nidulans_FGSC_A4:2163749-2164855 | WT_5hasex | WT_veg | OK     | 27,4775  | 35,9247 | 0,386727      | -0,677811     | 0,497892   | 0,748295   | no  |
| AN2989 | ChrVI_A_nidulans_FGSC_A4:2162247-2163053 | WT_5hasex | WT_veg | OK     | 526,357  | 790,847 | 0,587355      | -1,15483      | 0,24816    | 0,51638    | no  |
| AN2990 | ChrVI_A_nidulans_FGSC_A4:2158482-2159070 | WT_5hasex | WT_veg | OK     | 16,2037  | 20,1942 | 0,317621      | -0,478407     | 0,632361   | 0,831829   | no  |
| AN2991 | ChrVI_A_nidulans_FGSC_A4:2157617-2158086 | WT_5hasex | WT_veg | OK     | 44,2068  | 39,349  | -0,16794      | 0,279296      | 0,780018   | 0,910122   | no  |
| AN2992 | ChrVI_A_nidulans_FGSC_A4:2155368-2157131 | WT_5hasex | WT_veg | OK     | 253,326  | 519,169 | 1,03521       | -2,00752      | 0,0446939  | 0,163741   | no  |
| AN2993 | ChrVI_A_nidulans_FGSC_A4:2153560-2155272 | WT_5hasex | WT_veg | OK     | 88,581   | 407,275 | 2,20093       | -3,72474      | 0,00019551 | 0,00195483 | yes |
| AN2994 | ChrVI_A_nidulans_FGSC_A4:2149522-2153106 | WT_5hasex | WT_veg | OK     | 4,38103  | 7,31201 | 0,738998      | -1,13504      | 0,256359   | 0,526069   | no  |
| AN2995 | ChrVI_A_nidulans_FGSC_A4:2147704-2149126 | WT_5hasex | WT_veg | OK     | 118,435  | 265,971 | 1,16717       | -2,42714      | 0,0152183  | 0,0722948  | no  |
| AN2997 | ChrVI_A_nidulans_FGSC_A4:2144521-2147001 | WT_5hasex | WT_veg | OK     | 135,877  | 310,046 | 1,19018       | -2,23408      | 0,025478   | 0,07013    | no  |
| AN2998 | ChrVI_A_nidulans_FGSC_A4:2140669-2144012 | WT_5hasex | WT_veg | OK     | 66,4437  | 154,023 | 1,21294       | -2,37657      | 0,0174743  | 0,0803521  | no  |
| AN3000 | ChrVI_A_nidulans_FGSC_A4:2134122-2134743 | WT_5hasex | WT_veg | OK     | 66,1077  | 215,799 | 1,7068        | -3,25022      | 0,00115316 | 0,0088293  | yes |
| AN3001 | ChrVI_A_nidulans_FGSC_A4:2130985-2132979 | WT_5hasex | WT_veg | OK     | 114,444  | 89,9822 | -0,346934     | 0,605566      | 0,544803   | 0,778893   | no  |
| AN3002 | ChrVI_A_nidulans_FGSC_A4:2127885-2129816 | WT_5hasex | WT_veg | OK     | 7,48829  | 9,88245 | 0,400231      | -0,667515     | 0,504443   | 0,75265    | no  |
| AN3003 | ChrVI_A_nidulans_FGSC_A4:2125809-2127496 | WT_5hasex | WT_veg | OK     | 18,1704  | 29,4827 | 0,69828       | -1,3207       | 0,1866     | 0,43577    | no  |
| AN3004 | ChrVI_A_nidulans_FGSC_A4:2124049-2125443 | WT_5hasex | WT_veg | OK     | 21,2352  | 31,8831 | 0,586334      | -1,07223      | 0,283617   | 0,557406   | no  |
| AN3005 | ChrVI_A_nidulans_FGSC_A4:2121028-2123852 | WT_5hasex | WT_veg | OK     | 46,8401  | 249,707 | 2,41442       | -4,97041      | 6,6812E-07 | 1,2829E-05 | yes |
| AN3006 | ChrVI_A_nidulans_FGSC_A4:2119660-2120515 | WT_5hasex | WT_veg | OK     | 6,53054  | 13,467  | 1,04416       | -1,48612      | 0,137247   | 0,357992   | no  |
| AN3007 | ChrVI_A_nidulans_FGSC_A4:2117760-2118592 | WT_5hasex | WT_veg | NOTEST | 0,424476 | 0       | -1.79769e+308 | -1.79769e+308 | 0,165569   | 1          | no  |
| AN3008 | ChrVI_A_nidulans_FGSC_A4:2116375-2116799 | WT_5hasex | WT_veg | NOTEST | 0,585896 | 2,73167 | 2,22106       | -1,14626      | 0,251686   | 1          | no  |
| AN3009 | ChrVI_A_nidulans_FGSC_A4:2113483-2115580 | WT_5hasex | WT_veg | NOTEST | 0,860884 | 1,52866 | 0,828374      | -0,791852     | 0,428447   | 1          | no  |
| AN3010 | ChrVI_A_nidulans_FGSC_A4:2111893-2113141 | WT_5hasex | WT_veg | OK     | 14,1654  | 36,7215 | 1,37426       | -2,42938      | 0,0151246  | 0,0719921  | no  |
| AN3011 | ChrVI_A_nidulans_FGSC_A4:2110675-2111515 | WT_5hasex | WT_veg | OK     | 498,441  | 744,904 | 0,579631      | -1,16639      | 0,243456   | 0,51067    | no  |
| AN3012 | ChrVI_A_nidulans_FGSC_A4:2106234-2110426 | WT_5hasex | WT_veg | OK     | 31,0168  | 29,3554 | -0,0794209    | 0,164666      | 0,869207   | 0,950004   | no  |
| AN3013 | ChrVI_A_nidulans_FGSC_A4:2103148-2105592 | WT_5hasex | WT_veg | OK     | 32,5586  | 61,9899 | 0,928996      | -1,77432      | 0,076011   | 0,239079   | no  |
| AN3014 | ChrVI_A_nidulans_FGSC_A4:2098259-2102636 | WT_5hasex | WT_veg | OK     | 21,1681  | 37,9403 | 0,84184       | -1,68997      | 0,0910335  | 0,271064   | no  |
| AN3015 | ChrVI_A_nidulans_FGSC_A4:2096399-2097275 | WT_5hasex | WT_veg | OK     | 6,79693  | 5,17651 | -0,392905     | 0,517973      | 0,604477   | 0,816092   | no  |
| AN3016 | ChrVI_A_nidulans_FGSC_A4:2094728-2096104 | WT_5hasex | WT_veg | OK     | 11,7888  | 29,625  | 1,3294        | -2,29959      | 0,0214713  | 0,094061   | no  |
| AN3017 | ChrVI_A_nidulans_FGSC_A4:2092426-2094012 | WT_5hasex | WT_veg | OK     | 45,116   | 77,8528 | 0,787111      | -1,58637      | 0,112656   | 0,314028   | no  |
| AN3018 | ChrVI_A_nidulans_FGSC_A4:2090854-2092180 | WT_5hasex | WT_veg | OK     | 10,1799  | 11,7519 | 0,207165      | -0,329363     | 0,741881   | 0,891448   | no  |
| AN3019 | ChrVI_A_nidulans_FGSC_A4:2089697-2090780 | WT_5hasex | WT_veg | OK     | 244,175  | 419,25  | 0,779893      | -1,57582      | 0,115068   | 0,318414   | no  |
| AN3021 | ChrVI_A_nidulans_FGSC_A4:2079791-2084256 | WT_5hasex | WT_veg | OK     | 20,748   | 66,9803 | 1,69077       | -2,98881      | 0,00280068 | 0,0184512  | yes |

## Supplementary table 1

|        |                                          |           |        |        |          |         |               |               |            |            |     |
|--------|------------------------------------------|-----------|--------|--------|----------|---------|---------------|---------------|------------|------------|-----|
| AN3022 | ChrVI_A_nidulans_FGSC_A4:2077643-2079075 | WT_5hasex | WT_veg | OK     | 214,272  | 661,322 | 1,62591       | -3,19688      | 0,00138923 | 0,0103012  | yes |
| AN3023 | ChrVI_A_nidulans_FGSC_A4:2075622-2077311 | WT_5hasex | WT_veg | OK     | 6,65624  | 4,52462 | -0,556912     | 0,818288      | 0,413193   | 0,682698   | no  |
| AN3024 | ChrVI_A_nidulans_FGSC_A4:2073638-2075279 | WT_5hasex | WT_veg | OK     | 24,86687 | 22,7059 | 3,19066       | -5,87825      | 4,1462E-09 | 1,2964E-07 | yes |
| AN3025 | ChrVI_A_nidulans_FGSC_A4:2072600-2073427 | WT_5hasex | WT_veg | OK     | 23,3743  | 66,5033 | 1,5085        | -2,60069      | 0,00930376 | 0,0491567  | yes |
| AN3027 | ChrVI_A_nidulans_FGSC_A4:2067132-2067909 | WT_5hasex | WT_veg | OK     | 71,635   | 258,323 | 1,85044       | -3,43502      | 0,00059252 | 0,00503389 | yes |
| AN3028 | ChrVI_A_nidulans_FGSC_A4:2065474-2066615 | WT_5hasex | WT_veg | OK     | 29,5465  | 75,2271 | 1,34826       | -2,65372      | 0,007961   | 0,0434057  | yes |
| AN3029 | ChrVI_A_nidulans_FGSC_A4:2061807-2065062 | WT_5hasex | WT_veg | OK     | 36,1284  | 63,0539 | 0,803451      | -1,63818      | 0,101384   | 0,292407   | no  |
| AN3030 | ChrVI_A_nidulans_FGSC_A4:2060204-2061458 | WT_5hasex | WT_veg | OK     | 31,4795  | 67,5773 | 1,10213       | -2,05607      | 0,0397755  | 0,150264   | no  |
| AN3031 | ChrVI_A_nidulans_FGSC_A4:2058031-2059915 | WT_5hasex | WT_veg | OK     | 87,1623  | 130,51  | 0,582382      | -1,02049      | 0,307497   | 0,58361    | no  |
| AN3032 | ChrVI_A_nidulans_FGSC_A4:2056028-2057394 | WT_5hasex | WT_veg | OK     | 3,10779  | 8,6976  | 1,48473       | -2,02756      | 0,0426047  | 0,157913   | no  |
| AN3033 | ChrVI_A_nidulans_FGSC_A4:2052681-2054393 | WT_5hasex | WT_veg | OK     | 20,5086  | 40,6963 | 0,98867       | -1,86835      | 0,0617131  | 0,206256   | no  |
| AN3035 | ChrVI_A_nidulans_FGSC_A4:2047117-2049514 | WT_5hasex | WT_veg | OK     | 19,6093  | 23,0377 | 0,23246       | -0,46072      | 0,645      | 0,838588   | no  |
| AN3036 | ChrVI_A_nidulans_FGSC_A4:2045049-2046030 | WT_5hasex | WT_veg | OK     | 144,41   | 224,406 | 0,635935      | -1,28819      | 0,19768    | 0,451364   | no  |
| AN3037 | ChrVI_A_nidulans_FGSC_A4:2041854-2044076 | WT_5hasex | WT_veg | OK     | 2,15798  | 1,30528 | -0,725325     | 0,823082      | 0,410461   | 0,680384   | no  |
| AN3038 | ChrVI_A_nidulans_FGSC_A4:2038761-2040819 | WT_5hasex | WT_veg | OK     | 33,93    | 126,364 | 1,89695       | -3,90415      | 9,4558E-05 | 0,00104361 | yes |
| AN3039 | ChrVI_A_nidulans_FGSC_A4:2037446-2038563 | WT_5hasex | WT_veg | OK     | 31,3952  | 50,0284 | 0,672202      | -1,2799       | 0,200582   | 0,455234   | no  |
| AN3040 | ChrVI_A_nidulans_FGSC_A4:2035524-2037411 | WT_5hasex | WT_veg | OK     | 7,04922  | 20,7397 | 1,55686       | -2,61065      | 0,00903699 | 0,0480963  | yes |
| AN3041 | ChrVI_A_nidulans_FGSC_A4:2029568-2031557 | WT_5hasex | WT_veg | NOTEST | 0        | 0       | 0             | 0             | 1          | 1          | no  |
| AN3042 | ChrVI_A_nidulans_FGSC_A4:2028123-2028915 | WT_5hasex | WT_veg | OK     | 10,4078  | 4,28024 | -1,2819       | 1,59159       | 0,111478   | 0,311872   | no  |
| AN3043 | ChrVI_A_nidulans_FGSC_A4:2023548-2025116 | WT_5hasex | WT_veg | OK     | 15,2752  | 23,9033 | 0,64602       | -1,10488      | 0,269211   | 0,541023   | no  |
| AN3045 | ChrVI_A_nidulans_FGSC_A4:2017444-2019109 | WT_5hasex | WT_veg | NOTEST | 1,40853  | 0       | -1.79769e+308 | -1.79769e+308 | 0,0402618  | 1          | no  |
| AN3046 | ChrVI_A_nidulans_FGSC_A4:2016164-2017188 | WT_5hasex | WT_veg | NOTEST | 0,365404 | 1,94678 | 2,41353       | -1,56014      | 0,118726   | 1          | no  |
| AN3047 | ChrVI_A_nidulans_FGSC_A4:2012816-2014010 | WT_5hasex | WT_veg | OK     | 10,6932  | 23,005  | 1,10526       | -1,7873       | 0,0738895  | 0,234096   | no  |
| AN3048 | ChrVI_A_nidulans_FGSC_A4:2010310-2011696 | WT_5hasex | WT_veg | OK     | 10,4831  | 29,5055 | 1,49292       | -2,32367      | 0,0201429  | 0,0896416  | no  |
| AN3050 | ChrVI_A_nidulans_FGSC_A4:2003645-2006218 | WT_5hasex | WT_veg | OK     | 8,83333  | 17,6257 | 0,996654      | -1,78261      | 0,07465    | 0,235751   | no  |
| AN3052 | ChrVI_A_nidulans_FGSC_A4:1995553-1996051 | WT_5hasex | WT_veg | NOTEST | 1,05137  | 0       | -1.79769e+308 | -1.79769e+308 | 0,107729   | 1          | no  |
| AN3054 | ChrVI_A_nidulans_FGSC_A4:1985995-1989108 | WT_5hasex | WT_veg | OK     | 9,30531  | 18,6261 | 1,0012        | -1,81767      | 0,0691145  | 0,223454   | no  |
| AN3055 | ChrVI_A_nidulans_FGSC_A4:1984708-1985721 | WT_5hasex | WT_veg | OK     | 131,342  | 176,767 | 0,428521      | -0,865372     | 0,386834   | 0,660397   | no  |
| AN3056 | ChrVI_A_nidulans_FGSC_A4:1982757-1984228 | WT_5hasex | WT_veg | OK     | 9,7413   | 51,2098 | 2,39423       | -3,93787      | 8,221E-05  | 0,00092326 | yes |
| AN3057 | ChrVI_A_nidulans_FGSC_A4:1978537-1982590 | WT_5hasex | WT_veg | OK     | 45,4782  | 41,3506 | -0,137266     | 0,258926      | 0,795692   | 0,917098   | no  |
| AN3058 | ChrVI_A_nidulans_FGSC_A4:1978537-1982590 | WT_5hasex | WT_veg | OK     | 242,704  | 565,314 | 1,21986       | -2,04548      | 0,0408071  | 0,15295    | no  |
| AN3060 | ChrVI_A_nidulans_FGSC_A4:1974017-1974990 | WT_5hasex | WT_veg | OK     | 107,198  | 91,2785 | -0,231934     | 0,474701      | 0,635      | 0,833158   | no  |
| AN3061 | ChrVI_A_nidulans_FGSC_A4:1971952-1973841 | WT_5hasex | WT_veg | OK     | 45,9052  | 67,836  | 0,563393      | -1,14939      | 0,250393   | 0,518897   | no  |
| AN3062 | ChrVI_A_nidulans_FGSC_A4:1967504-1971560 | WT_5hasex | WT_veg | OK     | 11,9884  | 22,3307 | 0,897396      | -1,78539      | 0,0741974  | 0,234873   | no  |
| AN3063 | ChrVI_A_nidulans_FGSC_A4:1965059-1967166 | WT_5hasex | WT_veg | OK     | 15,5377  | 82,071  | 2,4011        | -4,6535       | 3,2635E-06 | 5,3061E-05 | yes |
| AN3064 | ChrVI_A_nidulans_FGSC_A4:1963411-1964615 | WT_5hasex | WT_veg | OK     | 104,538  | 99,5102 | -0,0711073    | 0,138184      | 0,890095   | 0,958356   | no  |
| AN3066 | ChrVI_A_nidulans_FGSC_A4:1958905-1960731 | WT_5hasex | WT_veg | OK     | 4,0042   | 8,14486 | 1,02438       | -1,42441      | 0,154328   | 0,386258   | no  |
| AN3067 | ChrVI_A_nidulans_FGSC_A4:1951052-1957853 | WT_5hasex | WT_veg | OK     | 6,4567   | 12,3114 | 0,931121      | -1,83514      | 0,0664855  | 0,2173     | no  |
| AN3068 | ChrVI_A_nidulans_FGSC_A4:1949979-1950632 | WT_5hasex | WT_veg | OK     | 85,046   | 89,9887 | 0,0814995     | -0,156299     | 0,875797   | 0,952455   | no  |
| AN3070 | ChrVI_A_nidulans_FGSC_A4:1944399-1946504 | WT_5hasex | WT_veg | OK     | 122,433  | 183,093 | 0,580588      | -1,17158      | 0,241365   | 0,507564   | no  |
| AN3071 | ChrVI_A_nidulans_FGSC_A4:1943106-1944227 | WT_5hasex | WT_veg | OK     | 13,1249  | 22,0402 | 0,747829      | -1,27332      | 0,202905   | 0,458728   | no  |
| AN3072 | ChrVI_A_nidulans_FGSC_A4:1939477-1942231 | WT_5hasex | WT_veg | OK     | 45,1749  | 54,8884 | 0,280979      | -0,554565     | 0,579192   | 0,800616   | no  |
| AN3073 | ChrVI_A_nidulans_FGSC_A4:1937280-1939126 | WT_5hasex | WT_veg | OK     | 30,5635  | 47,6145 | 0,639593      | -1,23274      | 0,217671   | 0,478177   | no  |
| AN3074 | ChrVI_A_nidulans_FGSC_A4:1930786-1932214 | WT_5hasex | WT_veg | OK     | 7,61584  | 10,3814 | 0,44692       | -0,704743     | 0,48097    | 0,735813   | no  |
| AN3076 | ChrVI_A_nidulans_FGSC_A4:1922142-1923112 | WT_5hasex | WT_veg | OK     | 1,77611  | 12,1534 | 2,77457       | -2,60972      | 0,00906176 | 0,0482037  | yes |
| AN3077 | ChrVI_A_nidulans_FGSC_A4:1914509-1916136 | WT_5hasex | WT_veg | OK     | 1,11579  | 3,92217 | 1,81359       | -1,81946      | 0,068842   | 0,22282    | no  |
| AN3078 | ChrVI_A_nidulans_FGSC_A4:1913068-1913553 | WT_5hasex | WT_veg | OK     | 0,483705 | 4,51043 | 3,22106       | -1,90802      | 0,056389   | 0,193281   | no  |
| AN3080 | ChrVI_A_nidulans_FGSC_A4:1906802-1910091 | WT_5hasex | WT_veg | OK     | 24,8014  | 29,1568 | 0,233406      | -0,477412     | 0,633069   | 0,832094   | no  |
| AN3081 | ChrVI_A_nidulans_FGSC_A4:1904357-1906540 | WT_5hasex | WT_veg | OK     | 41,6054  | 42,7369 | 0,0387121     | -0,0708681    | 0,943503   | 0,978908   | no  |
| AN3082 | ChrVI_A_nidulans_FGSC_A4:1901103-1904195 | WT_5hasex | WT_veg | OK     | 23,452   | 23,2103 | -0,0149432    | 0,0307633     | 0,975458   | 0,991386   | no  |
| AN3083 | ChrVI_A_nidulans_FGSC_A4:1896987-1899078 | WT_5hasex | WT_veg | OK     | 19,9776  | 32,0629 | 0,682523      | -1,26335      | 0,206464   | 0,463307   | no  |
| AN3084 | ChrVI_A_nidulans_FGSC_A4:1894624-1896093 | WT_5hasex | WT_veg | OK     | 23,2142  | 50,3601 | 1,11727       | -2,11586      | 0,0343564  | 0,134837   | no  |
| AN3085 | ChrVI_A_nidulans_FGSC_A4:1890896-1892758 | WT_5hasex | WT_veg | OK     | 127,582  | 1150,92 | 3,17329       | -5,46756      | 4,5628E-08 | 1,1453E-06 | yes |

## Supplementary table 1

|        |                                          |           |        |        |          |         |            |            |            |            |     |
|--------|------------------------------------------|-----------|--------|--------|----------|---------|------------|------------|------------|------------|-----|
| AN3086 | ChrVI_A_nidulans_FGSC_A4:1886655-1888821 | WT_5hasex | WT_veg | OK     | 15,7809  | 35,281  | 1,16071    | -2,04651   | 0,040706   | 0,152746   | no  |
| AN3087 | ChrVI_A_nidulans_FGSC_A4:1882020-1883937 | WT_5hasex | WT_veg | OK     | 38,7969  | 87,6025 | 1,17503    | -2,42033   | 0,0155064  | 0,0733429  | no  |
| AN3088 | ChrVI_A_nidulans_FGSC_A4:1880563-1881897 | WT_5hasex | WT_veg | OK     | 355,185  | 543,687 | 0,6142     | -1,22947   | 0,218897   | 0,737422   | no  |
| AN3089 | ChrVI_A_nidulans_FGSC_A4:1878110-1879329 | WT_5hasex | WT_veg | OK     | 180,391  | 449,813 | 1,3182     | -2,64503   | 0,00816843 | 0,0443245  | yes |
| AN3091 | ChrVI_A_nidulans_FGSC_A4:1868818-1871583 | WT_5hasex | WT_veg | OK     | 30,8617  | 59,2527 | 0,941065   | -1,93323   | 0,0532083  | 0,185424   | no  |
| AN3092 | ChrVI_A_nidulans_FGSC_A4:1861826-1867097 | WT_5hasex | WT_veg | OK     | 15,2024  | 16,5074 | 0,118808   | -0,237861  | 0,811989   | 0,924538   | no  |
| AN3094 | ChrVI_A_nidulans_FGSC_A4:1852291-1854826 | WT_5hasex | WT_veg | OK     | 10,3977  | 13,5298 | 0,379879   | -0,687858  | 0,491542   | 0,74365    | no  |
| AN3097 | ChrVI_A_nidulans_FGSC_A4:1845893-1847095 | WT_5hasex | WT_veg | OK     | 14,6578  | 34,1929 | 1,22203    | -2,11888   | 0,034101   | 0,134056   | no  |
| AN3099 | ChrVI_A_nidulans_FGSC_A4:1840767-1842325 | WT_5hasex | WT_veg | NOTEST | 0,544671 | 1,46168 | 1,42417    | -1,33955   | 0,18039    | 1          | no  |
| AN3100 | ChrVI_A_nidulans_FGSC_A4:1838592-1839281 | WT_5hasex | WT_veg | OK     | 73,7288  | 82,8652 | 0,168539   | -0,284215  | 0,776246   | 0,908721   | no  |
| AN3103 | ChrVI_A_nidulans_FGSC_A4:1815239-1815560 | WT_5hasex | WT_veg | OK     | 4,30523  | 6,76506 | 0,652014   | -0,622762  | 0,533441   | 0,772064   | no  |
| AN3104 | ChrVI_A_nidulans_FGSC_A4:1813092-1814472 | WT_5hasex | WT_veg | OK     | 56,38    | 145,338 | 1,36616    | -2,59212   | 0,00953876 | 0,0501857  | no  |
| AN3105 | ChrVI_A_nidulans_FGSC_A4:1811230-1812956 | WT_5hasex | WT_veg | OK     | 9,49355  | 10,6796 | 0,169837   | -0,277219  | 0,781612   | 0,910847   | no  |
| AN3107 | ChrVI_A_nidulans_FGSC_A4:1801285-1802985 | WT_5hasex | WT_veg | OK     | 7,99527  | 10,1065 | 0,338069   | -0,540208  | 0,589054   | 0,806617   | no  |
| AN3108 | ChrVI_A_nidulans_FGSC_A4:1798434-1800576 | WT_5hasex | WT_veg | OK     | 16,1733  | 22,4729 | 0,47457    | -0,914733  | 0,360332   | 0,634927   | no  |
| AN3110 | ChrVI_A_nidulans_FGSC_A4:1794581-1797475 | WT_5hasex | WT_veg | OK     | 23,4084  | 29,3738 | 0,327503   | -0,677492  | 0,498094   | 0,748347   | no  |
| AN3111 | ChrVI_A_nidulans_FGSC_A4:1792204-1794025 | WT_5hasex | WT_veg | OK     | 2,09931  | 3,07987 | 0,552951   | -0,699605  | 0,484174   | 0,738374   | no  |
| AN3113 | ChrVI_A_nidulans_FGSC_A4:1784658-1786349 | WT_5hasex | WT_veg | OK     | 123,711  | 224,975 | 0,862789   | -1,78618   | 0,0740706  | 0,234585   | no  |
| AN3114 | ChrVI_A_nidulans_FGSC_A4:1781628-1783483 | WT_5hasex | WT_veg | OK     | 37,0994  | 164,09  | 2,14502    | -4,3691    | 1,2476E-05 | 0,00017476 | yes |
| AN3115 | ChrVI_A_nidulans_FGSC_A4:1778561-1780920 | WT_5hasex | WT_veg | OK     | 12,0143  | 18,1039 | 0,591551   | -1,02573   | 0,30502    | 0,581117   | no  |
| AN3116 | ChrVI_A_nidulans_FGSC_A4:1775242-1777604 | WT_5hasex | WT_veg | OK     | 12,8213  | 17,9216 | 0,48316    | -0,923232  | 0,355886   | 0,631268   | no  |
| AN3117 | ChrVI_A_nidulans_FGSC_A4:1770537-1774173 | WT_5hasex | WT_veg | OK     | 62,9505  | 25,4771 | -1,30502   | 2,27736    | 0,0227645  | 0,0981975  | no  |
| AN3118 | ChrVI_A_nidulans_FGSC_A4:1768404-1770392 | WT_5hasex | WT_veg | OK     | 19,3844  | 26,0158 | 0,424489   | -0,823909  | 0,409991   | 0,680014   | no  |
| AN3119 | ChrVI_A_nidulans_FGSC_A4:1766841-1767792 | WT_5hasex | WT_veg | OK     | 5,66095  | 7,65928 | 0,436165   | -0,596431  | 0,550888   | 0,782638   | no  |
| AN3120 | ChrVI_A_nidulans_FGSC_A4:1763831-1766046 | WT_5hasex | WT_veg | OK     | 7,90758  | 16,7115 | 1,07953    | -1,81898   | 0,068914   | 0,222971   | no  |
| AN3121 | ChrVI_A_nidulans_FGSC_A4:1761578-1762445 | WT_5hasex | WT_veg | OK     | 107,259  | 678,111 | 2,66042    | -5,02853   | 4,9424E-07 | 9,7586E-06 | yes |
| AN3122 | ChrVI_A_nidulans_FGSC_A4:1757875-1760457 | WT_5hasex | WT_veg | OK     | 50,7585  | 76,7594 | 0,596694   | -1,23817   | 0,215654   | 0,47556    | no  |
| AN3123 | ChrVI_A_nidulans_FGSC_A4:1751224-1757577 | WT_5hasex | WT_veg | OK     | 14,1848  | 18,3329 | 0,370096   | -0,756912  | 0,449102   | 0,711552   | no  |
| AN3124 | ChrVI_A_nidulans_FGSC_A4:1748174-1751071 | WT_5hasex | WT_veg | OK     | 29,8095  | 54,2601 | 0,86412    | -1,79137   | 0,0732336  | 0,232764   | no  |
| AN3125 | ChrVI_A_nidulans_FGSC_A4:1746178-1747604 | WT_5hasex | WT_veg | OK     | 5,96792  | 28,8553 | 2,27353    | -3,47511   | 0,00051065 | 0,00443253 | yes |
| AN3127 | ChrVI_A_nidulans_FGSC_A4:1740901-1742104 | WT_5hasex | WT_veg | OK     | 2,91658  | 6,6711  | 1,19365    | -1,54755   | 0,12173    | 0,33089    | no  |
| AN3130 | ChrVI_A_nidulans_FGSC_A4:1729136-1731238 | WT_5hasex | WT_veg | OK     | 11,7001  | 32,0644 | 1,45446    | -2,24789   | 0,0245835  | 0,104023   | no  |
| AN3131 | ChrVI_A_nidulans_FGSC_A4:1726634-1728222 | WT_5hasex | WT_veg | OK     | 37,4619  | 38,0525 | 0,0225668  | -0,0451111 | 0,964019   | 0,986499   | no  |
| AN3132 | ChrVI_A_nidulans_FGSC_A4:1724722-1726234 | WT_5hasex | WT_veg | OK     | 44,031   | 49,3421 | 0,1643     | -0,330714  | 0,740861   | 0,891277   | no  |
| AN3133 | ChrVI_A_nidulans_FGSC_A4:1723290-1724232 | WT_5hasex | WT_veg | OK     | 6,22775  | 16,7772 | 1,42972    | -2,08004   | 0,0375223  | 0,143868   | no  |
| AN3134 | ChrVI_A_nidulans_FGSC_A4:1720837-1722811 | WT_5hasex | WT_veg | OK     | 102,335  | 135,782 | 0,40799    | -0,835613  | 0,403373   | 0,674672   | no  |
| AN3135 | ChrVI_A_nidulans_FGSC_A4:1720196-1720823 | WT_5hasex | WT_veg | OK     | 23,3364  | 96,9126 | 2,0541     | -3,53042   | 0,00041491 | 0,0037096  | yes |
| AN3136 | ChrVI_A_nidulans_FGSC_A4:1715841-1719601 | WT_5hasex | WT_veg | OK     | 17,7945  | 15,5065 | -0,198563  | 0,39984    | 0,689274   | 0,863243   | no  |
| AN3137 | ChrVI_A_nidulans_FGSC_A4:1713779-1715105 | WT_5hasex | WT_veg | OK     | 84,7854  | 223,676 | 1,39952    | -2,89338   | 0,00381125 | 0,0238582  | yes |
| AN3139 | ChrVI_A_nidulans_FGSC_A4:1708304-1709832 | WT_5hasex | WT_veg | OK     | 11,7217  | 2,67021 | -2,13415   | 2,63841    | 0,00832958 | 0,0450033  | yes |
| AN3140 | ChrVI_A_nidulans_FGSC_A4:1706019-1707922 | WT_5hasex | WT_veg | OK     | 71,7192  | 184,884 | 1,36619    | -2,75595   | 0,00585223 | 0,0338039  | yes |
| AN3141 | ChrVI_A_nidulans_FGSC_A4:1701745-1704936 | WT_5hasex | WT_veg | OK     | 99,5699  | 310,753 | 1,64198    | -2,65609   | 0,00790517 | 0,0431552  | yes |
| AN3142 | ChrVI_A_nidulans_FGSC_A4:1698957-1701203 | WT_5hasex | WT_veg | OK     | 69,852   | 110,853 | 0,666277   | -1,37142   | 0,170245   | 0,411323   | no  |
| AN3143 | ChrVI_A_nidulans_FGSC_A4:1692065-1694675 | WT_5hasex | WT_veg | OK     | 12,5236  | 14,8562 | 0,246411   | -0,4584    | 0,646665   | 0,839732   | no  |
| AN3145 | ChrVI_A_nidulans_FGSC_A4:1680897-1683040 | WT_5hasex | WT_veg | OK     | 54,9902  | 101,649 | 0,886347   | -1,77071   | 0,0766092  | 0,240431   | no  |
| AN3147 | ChrVI_A_nidulans_FGSC_A4:1668938-1669925 | WT_5hasex | WT_veg | OK     | 524,873  | 431,421 | -0,282873  | 0,55586    | 0,578306   | 0,800099   | no  |
| AN3148 | ChrVI_A_nidulans_FGSC_A4:1665307-1668740 | WT_5hasex | WT_veg | OK     | 44,5695  | 158,891 | 1,83391    | -3,47879   | 0,00050369 | 0,00437936 | yes |
| AN3149 | ChrVI_A_nidulans_FGSC_A4:1664212-1665141 | WT_5hasex | WT_veg | OK     | 40,0647  | 49,1458 | 0,294737   | -0,565781  | 0,571542   | 0,796147   | no  |
| AN3150 | ChrVI_A_nidulans_FGSC_A4:1660969-1663388 | WT_5hasex | WT_veg | OK     | 74,7072  | 246,61  | 1,72291    | -3,56791   | 0,00035984 | 0,00328253 | yes |
| AN3151 | ChrVI_A_nidulans_FGSC_A4:1660294-1660777 | WT_5hasex | WT_veg | OK     | 6,4884   | 5,01013 | -0,373013  | 0,394069   | 0,69353    | 0,865665   | no  |
| AN3153 | ChrVI_A_nidulans_FGSC_A4:1639090-1640515 | WT_5hasex | WT_veg | OK     | 31,5201  | 49,407  | 0,648445   | -1,2077    | 0,227162   | 0,490088   | no  |
| AN3154 | ChrVI_A_nidulans_FGSC_A4:1635053-1637274 | WT_5hasex | WT_veg | OK     | 12,7599  | 12,5387 | -0,0252303 | 0,0470057  | 0,962509   | 0,986203   | no  |
| AN3155 | ChrVI_A_nidulans_FGSC_A4:1632340-1634493 | WT_5hasex | WT_veg | OK     | 23,773   | 80,4776 | 1,75926    | -3,25974   | 0,00111515 | 0,00859609 | yes |

## Supplementary table 1

|        |                                          |           |        |        |          |          |               |               |            |            |     |
|--------|------------------------------------------|-----------|--------|--------|----------|----------|---------------|---------------|------------|------------|-----|
| AN3156 | ChrVI_A_nidulans_FGSC_A4:1630456-1632191 | WT_5hasex | WT_veg | OK     | 133,188  | 208,854  | 0,649035      | -1,30642      | 0,191408   | 0,442445   | no  |
| AN3157 | ChrVI_A_nidulans_FGSC_A4:1627576-1630305 | WT_5hasex | WT_veg | OK     | 49,2194  | 58,0135  | 0,237162      | -0,490776     | 0,623585   | 0,826294   | no  |
| AN3158 | ChrVI_A_nidulans_FGSC_A4:1626070-1627255 | WT_5hasex | WT_veg | OK     | 20,6684  | 11,9055  | -0,795805     | 1,40398       | 0,160325   | 0,395841   | no  |
| AN3159 | ChrVI_A_nidulans_FGSC_A4:1622189-1623731 | WT_5hasex | WT_veg | OK     | 1,86641  | 5,63604  | 1,59441       | -2,01625      | 0,0437739  | 0,161152   | no  |
| AN3160 | ChrVI_A_nidulans_FGSC_A4:1619723-1621678 | WT_5hasex | WT_veg | OK     | 4,61456  | 2,85263  | -0,693902     | 0,957156      | 0,338488   | 0,614455   | no  |
| AN3161 | ChrVI_A_nidulans_FGSC_A4:1617420-1618559 | WT_5hasex | WT_veg | OK     | 161,183  | 435,553  | 1,43415       | -2,88348      | 0,00393309 | 0,0244573  | yes |
| AN3162 | ChrVI_A_nidulans_FGSC_A4:1615159-1615889 | WT_5hasex | WT_veg | OK     | 39,8076  | 34,9849  | -0,186312     | 0,315103      | 0,752684   | 0,897207   | no  |
| AN3163 | ChrVI_A_nidulans_FGSC_A4:1612516-1613896 | WT_5hasex | WT_veg | OK     | 1509,75  | 1216,26  | -0,311851     | 0,445066      | 0,656272   | 0,84517    | no  |
| AN3164 | ChrVI_A_nidulans_FGSC_A4:1611238-1612225 | WT_5hasex | WT_veg | OK     | 12,8248  | 22,7217  | 0,825131      | -1,36464      | 0,172365   | 0,414667   | no  |
| AN3165 | ChrVI_A_nidulans_FGSC_A4:1608561-1610436 | WT_5hasex | WT_veg | OK     | 35,1246  | 118,127  | 1,74978       | -3,59814      | 0,0003205  | 0,00298042 | yes |
| AN3166 | ChrVI_A_nidulans_FGSC_A4:1607439-1608212 | WT_5hasex | WT_veg | OK     | 13,0631  | 40,9401  | 1,64801       | -2,60439      | 0,00920374 | 0,0487708  | yes |
| AN3168 | ChrVI_A_nidulans_FGSC_A4:1603047-1604375 | WT_5hasex | WT_veg | OK     | 122,126  | 227,955  | 0,900373      | -1,85681      | 0,0633388  | 0,209935   | no  |
| AN3169 | ChrVI_A_nidulans_FGSC_A4:1600286-1602206 | WT_5hasex | WT_veg | OK     | 67,4638  | 211,84   | 1,65079       | -3,43729      | 0,00058757 | 0,00500156 | yes |
| AN3170 | ChrVI_A_nidulans_FGSC_A4:1595670-1598568 | WT_5hasex | WT_veg | OK     | 14,6409  | 47,3954  | 1,69474       | -3,22576      | 0,00125637 | 0,00947418 | yes |
| AN3171 | ChrVI_A_nidulans_FGSC_A4:1594015-1594873 | WT_5hasex | WT_veg | OK     | 16,7134  | 55,7384  | 1,73767       | -2,61482      | 0,00892757 | 0,0476592  | yes |
| AN3172 | ChrVI_A_nidulans_FGSC_A4:1592425-1593864 | WT_5hasex | WT_veg | OK     | 581,712  | 675,301  | 0,215225      | -0,386599     | 0,699053   | 0,868793   | no  |
| AN3173 | ChrVI_A_nidulans_FGSC_A4:1591211-1592199 | WT_5hasex | WT_veg | OK     | 70,1154  | 211,639  | 1,5938        | -3,25892      | 0,00111837 | 0,00861959 | yes |
| AN3174 | ChrVI_A_nidulans_FGSC_A4:1589088-1589895 | WT_5hasex | WT_veg | OK     | 7,79945  | 28,2959  | 1,85915       | -2,69639      | 0,00700946 | 0,0391797  | yes |
| AN3175 | ChrVI_A_nidulans_FGSC_A4:1581973-1583611 | WT_5hasex | WT_veg | OK     | 1,5925   | 35,8123  | 4,49109       | -6,06452      | 1,3235E-09 | 4,5478E-08 | yes |
| AN3177 | ChrVI_A_nidulans_FGSC_A4:1577823-1578969 | WT_5hasex | WT_veg | OK     | 22,4049  | 40,7447  | 0,862797      | -1,57305      | 0,115708   | 0,319492   | no  |
| AN3179 | ChrVI_A_nidulans_FGSC_A4:1572738-1574866 | WT_5hasex | WT_veg | OK     | 87,9496  | 232,608  | 1,40315       | -2,88961      | 0,00385717 | 0,0240766  | yes |
| AN3180 | ChrVI_A_nidulans_FGSC_A4:1567679-1569792 | WT_5hasex | WT_veg | OK     | 145,948  | 266,084  | 0,866424      | -1,74934      | 0,0802314  | 0,248216   | no  |
| AN3181 | ChrVI_A_nidulans_FGSC_A4:1562831-1564849 | WT_5hasex | WT_veg | OK     | 36,0065  | 81,1304  | 1,17199       | -2,05525      | 0,0398549  | 0,150464   | no  |
| AN3182 | ChrVI_A_nidulans_FGSC_A4:1559952-1560569 | WT_5hasex | WT_veg | OK     | 39,8606  | 25,9839  | -0,617345     | 0,953585      | 0,340294   | 0,615975   | no  |
| AN3183 | ChrVI_A_nidulans_FGSC_A4:1554339-1558158 | WT_5hasex | WT_veg | OK     | 7,82499  | 12,507   | 0,676574      | -1,29447      | 0,195504   | 0,448164   | no  |
| AN3184 | ChrVI_A_nidulans_FGSC_A4:1552265-1553886 | WT_5hasex | WT_veg | OK     | 20,1474  | 29,1483  | 0,532815      | -1,00283      | 0,315945   | 0,592158   | no  |
| AN3186 | ChrVI_A_nidulans_FGSC_A4:1547353-1549939 | WT_5hasex | WT_veg | OK     | 20,4733  | 39,3558  | 0,942832      | -1,91109      | 0,0559928  | 0,192272   | no  |
| AN3187 | ChrVI_A_nidulans_FGSC_A4:1543713-1545716 | WT_5hasex | WT_veg | OK     | 10,4709  | 19,5312  | 0,899401      | -1,60579      | 0,10832    | 0,306274   | no  |
| AN3188 | ChrVI_A_nidulans_FGSC_A4:1539289-1543022 | WT_5hasex | WT_veg | OK     | 34,9585  | 104,587  | 1,58099       | -3,30207      | 0,00095975 | 0,00759139 | yes |
| AN3190 | ChrVI_A_nidulans_FGSC_A4:1529646-1531061 | WT_5hasex | WT_veg | OK     | 87,1414  | 192,395  | 1,14264       | -2,39394      | 0,0166685  | 0,0776051  | no  |
| AN3191 | ChrVI_A_nidulans_FGSC_A4:1528257-1529439 | WT_5hasex | WT_veg | OK     | 8,49169  | 13,1882  | 0,635126      | -0,967915     | 0,333087   | 0,609463   | no  |
| AN3193 | ChrVI_A_nidulans_FGSC_A4:1522054-1523490 | WT_5hasex | WT_veg | OK     | 39,4218  | 59,3867  | 0,591146      | -1,17711      | 0,239152   | 0,505      | no  |
| AN3194 | ChrVI_A_nidulans_FGSC_A4:1519689-1521804 | WT_5hasex | WT_veg | OK     | 24,594   | 83,3356  | 1,76062       | -3,30088      | 0,00096383 | 0,00761332 | yes |
| AN3195 | ChrVI_A_nidulans_FGSC_A4:1517095-1519006 | WT_5hasex | WT_veg | NOTEST | 0,278411 | 0,508383 | 0,868703      | -0,482521     | 0,629436   | 1          | no  |
| AN3197 | ChrVI_A_nidulans_FGSC_A4:1513299-1513935 | WT_5hasex | WT_veg | OK     | 3,2049   | 6,73691  | 1,07181       | -1,22685      | 0,219879   | 0,48117    | no  |
| AN3198 | ChrVI_A_nidulans_FGSC_A4:1511882-1512867 | WT_5hasex | WT_veg | OK     | 59,1576  | 20,6003  | -1,5219       | 2,72359       | 0,00645758 | 0,0367023  | yes |
| AN3199 | ChrVI_A_nidulans_FGSC_A4:1508925-1510753 | WT_5hasex | WT_veg | NOTEST | 1,60525  | 1,13429  | -0,501006     | 0,488007      | 0,625545   | 1          | no  |
| AN3200 | ChrVI_A_nidulans_FGSC_A4:1503886-1506040 | WT_5hasex | WT_veg | OK     | 29,1666  | 51,9917  | 0,833965      | -1,52118      | 0,128214   | 0,342122   | no  |
| AN3203 | ChrVI_A_nidulans_FGSC_A4:1493748-1494933 | WT_5hasex | WT_veg | OK     | 13,2573  | 27,1319  | 1,0332        | -1,74848      | 0,0803805  | 0,248457   | no  |
| AN3204 | ChrVI_A_nidulans_FGSC_A4:1487718-1489473 | WT_5hasex | WT_veg | OK     | 1,4308   | 4,77416  | 1,73842       | -2,17229      | 0,0298335  | 0,120881   | no  |
| AN3205 | ChrVI_A_nidulans_FGSC_A4:1484769-1486358 | WT_5hasex | WT_veg | NOTEST | 0,749708 | 2,82518  | 1,91394       | -1,98564      | 0,0470732  | 1          | no  |
| AN3206 | ChrVI_A_nidulans_FGSC_A4:1480835-1482864 | WT_5hasex | WT_veg | OK     | 99,3959  | 15,796   | -2,65362      | 4,56889       | 4,903E-06  | 7,6071E-05 | yes |
| AN3207 | ChrVI_A_nidulans_FGSC_A4:1477402-1479729 | WT_5hasex | WT_veg | NOTEST | 1,1071   | 0,826414 | -0,421847     | 0,364791      | 0,715267   | 1          | no  |
| AN3208 | ChrVI_A_nidulans_FGSC_A4:1475058-1477107 | WT_5hasex | WT_veg | NOTEST | 1,89256  | 1,15634  | -0,710775     | 0,709039      | 0,4783     | 1          | no  |
| AN3209 | ChrVI_A_nidulans_FGSC_A4:1474034-1474669 | WT_5hasex | WT_veg | OK     | 4,9904   | 3,47633  | -0,521591     | 0,4818        | 0,629948   | 0,830439   | no  |
| AN3210 | ChrVI_A_nidulans_FGSC_A4:1464945-1467562 | WT_5hasex | WT_veg | NOTEST | 0,332576 | 0        | -1.79769e+308 | -1.79769e+308 | 0,0375932  | 1          | no  |
| AN3211 | ChrVI_A_nidulans_FGSC_A4:1460415-1461226 | WT_5hasex | WT_veg | OK     | 10,4029  | 4,48407  | -1,2141       | 1,50273       | 0,132908   | 0,350458   | no  |
| AN3212 | ChrVI_A_nidulans_FGSC_A4:1459015-1459964 | WT_5hasex | WT_veg | OK     | 3,48589  | 2,52679  | -0,464221     | 0,480878      | 0,630603   | 0,830775   | no  |
| AN3214 | ChrVI_A_nidulans_FGSC_A4:1443411-1446416 | WT_5hasex | WT_veg | OK     | 21,4287  | 20,5017  | -0,0638058    | 0,129352      | 0,897079   | 0,960695   | no  |
| AN3215 | ChrVI_A_nidulans_FGSC_A4:1441088-1441760 | WT_5hasex | WT_veg | OK     | 2,76282  | 9,24692  | 1,74283       | -1,84982      | 0,0643401  | 0,212354   | no  |
| AN3216 | ChrVI_A_nidulans_FGSC_A4:1436523-1439892 | WT_5hasex | WT_veg | OK     | 6,36069  | 14,4843  | 1,18724       | -2,01517      | 0,0438872  | 0,161478   | no  |
| AN3217 | ChrVI_A_nidulans_FGSC_A4:1433361-1435725 | WT_5hasex | WT_veg | OK     | 4,11333  | 3,94364  | -0,0607801    | 0,0882855     | 0,92965    | 0,973256   | no  |
| AN3218 | ChrVI_A_nidulans_FGSC_A4:1430276-1431050 | WT_5hasex | WT_veg | OK     | 26,3218  | 14,893   | -0,821618     | 1,33879       | 0,18064    | 0,427162   | no  |

## Supplementary table 1

|        |                                          |           |        |        |           |           |               |               |            |            |     |
|--------|------------------------------------------|-----------|--------|--------|-----------|-----------|---------------|---------------|------------|------------|-----|
| AN3219 | ChrVI_A_nidulans_FGSC_A4:1428798-1429977 | WT_5hasex | WT_veg | NOTEST | 0         | 0         | 0             | 0             | 1          | 1          | no  |
| AN3220 | ChrVI_A_nidulans_FGSC_A4:1425866-1428151 | WT_5hasex | WT_veg | OK     | 3,9631    | 7,93548   | 1,00169       | -1,49722      | 0,134336   | 0,353095   | no  |
| AN3221 | ChrVI_A_nidulans_FGSC_A4:1423156-1425072 | WT_5hasex | WT_veg | OK     | 13,09     | 14,8561   | 0,182581      | -0,311382     | 0,75551    | 0,898615   | no  |
| AN3222 | ChrVI_A_nidulans_FGSC_A4:1418640-1420425 | WT_5hasex | WT_veg | OK     | 91,8931   | 265,694   | 1,53174       | -3,12174      | 0,00179788 | 0,0127676  | yes |
| AN3224 | ChrVI_A_nidulans_FGSC_A4:1412557-1414555 | WT_5hasex | WT_veg | OK     | 33,75     | 45,1676   | 0,420402      | -0,857221     | 0,391323   | 0,66451    | no  |
| AN3226 | ChrVI_A_nidulans_FGSC_A4:1407003-1408197 | WT_5hasex | WT_veg | OK     | 1022,88   | 964,329   | -0,0850438    | 0,127001      | 0,898939   | 0,9612     | no  |
| AN3227 | ChrVI_A_nidulans_FGSC_A4:1404836-1406437 | WT_5hasex | WT_veg | OK     | 24,1786   | 0,113703  | -7,73232      | 2,6118        | 0,00900678 | 0,047994   | yes |
| AN3228 | ChrVI_A_nidulans_FGSC_A4:1402956-1403965 | WT_5hasex | WT_veg | OK     | 56,9336   | 6,92673   | -3,03903      | 4,52652       | 5,9962E-06 | 9,1103E-05 | yes |
| AN3229 | ChrVI_A_nidulans_FGSC_A4:1400277-1402216 | WT_5hasex | WT_veg | OK     | 52,0161   | 4,8026    | -3,43707      | 5,4271        | 5,7278E-08 | 1,4118E-06 | yes |
| AN3230 | ChrVI_A_nidulans_FGSC_A4:1392710-1399356 | WT_5hasex | WT_veg | OK     | 25,8811   | 8,37504   | -1,62773      | 2,56692       | 0,0102607  | 0,0531618  | no  |
| AN3231 | ChrVI_A_nidulans_FGSC_A4:1390865-1392196 | WT_5hasex | WT_veg | OK     | 38,5036   | 130,206   | 1,75773       | -3,56093      | 0,00036955 | 0,00335732 | yes |
| AN3232 | ChrVI_A_nidulans_FGSC_A4:1388855-1390532 | WT_5hasex | WT_veg | OK     | 6,2897    | 70,1442   | 3,47926       | -5,55184      | 2,8268E-08 | 7,4326E-07 | yes |
| AN3233 | ChrVI_A_nidulans_FGSC_A4:1384968-1386990 | WT_5hasex | WT_veg | NOTEST | 0,203192  | 0,244776  | 0,268623      | -0,136715     | 0,891256   | 1          | no  |
| AN3234 | ChrVI_A_nidulans_FGSC_A4:1382968-1383909 | WT_5hasex | WT_veg | OK     | 5,22985   | 3,34875   | -0,643148     | 0,694134      | 0,487598   | 0,741106   | no  |
| AN3235 | ChrVI_A_nidulans_FGSC_A4:1380430-1381689 | WT_5hasex | WT_veg | NOTEST | 0         | 0,189193  | 1.79769e+308  | 1.79769e+308  | 0,309884   | 1          | no  |
| AN3236 | ChrVI_A_nidulans_FGSC_A4:1378527-1379639 | WT_5hasex | WT_veg | OK     | 28,5349   | 48,4359   | 0,76335       | -1,44216      | 0,149258   | 0,377791   | no  |
| AN3237 | ChrVI_A_nidulans_FGSC_A4:1375806-1377662 | WT_5hasex | WT_veg | NOTEST | 0         | 0         | 0             | 0             | 1          | 1          | no  |
| AN3238 | ChrVI_A_nidulans_FGSC_A4:1372974-1373580 | WT_5hasex | WT_veg | OK     | 5,65198   | 1,83837   | -1,62033      | 1,0838        | 0,278456   | 0,551689   | no  |
| AN3239 | ChrVI_A_nidulans_FGSC_A4:1370151-1371627 | WT_5hasex | WT_veg | OK     | 103,146   | 16,8961   | -2,60992      | 4,39254       | 1,1204E-05 | 0,00015889 | yes |
| AN3240 | ChrVI_A_nidulans_FGSC_A4:1366763-1369608 | WT_5hasex | WT_veg | NOTEST | 1,11725   | 0         | -1.79769e+308 | -1.79769e+308 | 0,043391   | 1          | no  |
| AN3241 | ChrVI_A_nidulans_FGSC_A4:1364029-1365237 | WT_5hasex | WT_veg | NOTEST | 0,494638  | 0         | -1.79769e+308 | -1.79769e+308 | 0,107729   | 1          | no  |
| AN3242 | ChrVI_A_nidulans_FGSC_A4:1363030-1363721 | WT_5hasex | WT_veg | NOTEST | 0         | 0         | 0             | 0             | 1          | 1          | no  |
| AN3243 | ChrVI_A_nidulans_FGSC_A4:1361053-1362061 | WT_5hasex | WT_veg | NOTEST | 0,515281  | 1,02904   | 0,997869      | -0,717997     | 0,472759   | 1          | no  |
| AN3244 | ChrVI_A_nidulans_FGSC_A4:1357079-1358903 | WT_5hasex | WT_veg | OK     | 6,11058   | 19,5575   | 1,67834       | -2,48894      | 0,0128124  | 0,063357   | no  |
| AN3245 | ChrVI_A_nidulans_FGSC_A4:1356323-1356806 | WT_5hasex | WT_veg | NOTEST | 0         | 1,86489   | 1.79769e+308  | 1.79769e+308  | 0,123323   | 1          | no  |
| AN3246 | ChrVI_A_nidulans_FGSC_A4:1354082-1354760 | WT_5hasex | WT_veg | OK     | 1,33982   | 26,4803   | 4,30481       | -4,61222      | 3,984E-06  | 6,3034E-05 | yes |
| AN3247 | ChrVI_A_nidulans_FGSC_A4:1346222-1350716 | WT_5hasex | WT_veg | OK     | 20,8309   | 0,199484  | -6,70631      | 4,73948       | 2,1427E-06 | 3,6574E-05 | yes |
| AN3248 | ChrVI_A_nidulans_FGSC_A4:1343991-1345434 | WT_5hasex | WT_veg | NOTEST | 0,139034  | 0         | -1.79769e+308 | -1.79769e+308 | 0,23809    | 1          | no  |
| AN3249 | ChrVI_A_nidulans_FGSC_A4:1342383-1343530 | WT_5hasex | WT_veg | NOTEST | 0,178535  | 3,32958   | 4,22106       | -2,67254      | 0,00752784 | 1          | no  |
| AN3250 | ChrVI_A_nidulans_FGSC_A4:1338760-1340143 | WT_5hasex | WT_veg | NOTEST | 0,14912   | 0,589509  | 1,98304       | -0,83419      | 0,404174   | 1          | no  |
| AN3251 | ChrVI_A_nidulans_FGSC_A4:1337289-1338294 | WT_5hasex | WT_veg | OK     | 4,55189   | 31,5107   | 2,7913        | -3,88746      | 0,0001013  | 0,00110822 | yes |
| AN3252 | ChrVI_A_nidulans_FGSC_A4:1332079-1335062 | WT_5hasex | WT_veg | NOTEST | 0,0676332 | 0         | -1.79769e+308 | -1.79769e+308 | 0,23809    | 1          | no  |
| AN3254 | ChrVI_A_nidulans_FGSC_A4:1326526-1328416 | WT_5hasex | WT_veg | NOTEST | 0         | 0,495715  | 1.79769e+308  | 1.79769e+308  | 0,123323   | 1          | no  |
| AN3255 | ChrVI_A_nidulans_FGSC_A4:1324990-1326065 | WT_5hasex | WT_veg | OK     | 32,1398   | 489,955   | 3,93022       | -7,05567      | 1,7177E-12 | 9,2606E-11 | yes |
| AN3257 | ChrVI_A_nidulans_FGSC_A4:1320974-1322359 | WT_5hasex | WT_veg | NOTEST | 0         | 0,665346  | 1.79769e+308  | 1.79769e+308  | 0,123323   | 1          | no  |
| AN3258 | ChrVI_A_nidulans_FGSC_A4:1315104-1315869 | WT_5hasex | WT_veg | OK     | 93,0877   | 406,331   | 2,12599       | -4,07792      | 4,544E-05  | 0,00055074 | yes |
| AN3259 | ChrVI_A_nidulans_FGSC_A4:1312156-1313587 | WT_5hasex | WT_veg | NOTEST | 0,147058  | 2,29487   | 3,96396       | -1,89155      | 0,0585512  | 1          | no  |
| AN3261 | ChrVI_A_nidulans_FGSC_A4:1305320-1307697 | WT_5hasex | WT_veg | NOTEST | 0,506748  | 0         | -1.79769e+308 | -1.79769e+308 | 0,081629   | 1          | no  |
| AN3262 | ChrVI_A_nidulans_FGSC_A4:1300808-1303030 | WT_5hasex | WT_veg | OK     | 20,2615   | 40,7773   | 1,00902       | -1,92511      | 0,054215   | 0,187883   | no  |
| AN3263 | ChrVI_A_nidulans_FGSC_A4:1299546-1300293 | WT_5hasex | WT_veg | OK     | 3,77276   | 7,55083   | 1,00101       | -1,24764      | 0,212165   | 0,470976   | no  |
| AN3264 | ChrVI_A_nidulans_FGSC_A4:1296287-1298112 | WT_5hasex | WT_veg | OK     | 29,4019   | 99,5289   | 1,75921       | -3,19914      | 0,0013784  | 0,0102339  | yes |
| AN3267 | ChrVI_A_nidulans_FGSC_A4:1287680-1290841 | WT_5hasex | WT_veg | NOTEST | 0,736437  | 0,437508  | -0,751252     | 0,606282      | 0,544327   | 1          | no  |
| AN3269 | ChrVI_A_nidulans_FGSC_A4:1279122-1281272 | WT_5hasex | WT_veg | OK     | 1,91314   | 4,28076   | 1,16192       | -1,48875      | 0,136552   | 0,356746   | no  |
| AN3270 | ChrVI_A_nidulans_FGSC_A4:1276976-1278700 | WT_5hasex | WT_veg | NOTEST | 0,269314  | 0,51343   | 0,930882      | -0,529701     | 0,596319   | 1          | no  |
| AN3271 | ChrVI_A_nidulans_FGSC_A4:1274488-1276163 | WT_5hasex | WT_veg | NOTEST | 0         | 0         | 0             | 0             | 1          | 1          | no  |
| AN3273 | ChrVI_A_nidulans_FGSC_A4:1263713-1271743 | WT_5hasex | WT_veg | NOTEST | 0,141958  | 0,0343146 | -2,04857      | 0,673175      | 0,500836   | 1          | no  |
| AN3276 | ChrVI_A_nidulans_FGSC_A4:1255249-1256226 | WT_5hasex | WT_veg | OK     | 5,28527   | 9,97833   | 0,916821      | -1,24837      | 0,211897   | 0,47078    | no  |
| AN3277 | ChrVI_A_nidulans_FGSC_A4:1253458-1254638 | WT_5hasex | WT_veg | OK     | 3,43812   | 2,3859    | -0,527087     | 0,572336      | 0,567094   | 0,793545   | no  |
| AN3278 | ChrVI_A_nidulans_FGSC_A4:1251725-1253145 | WT_5hasex | WT_veg | OK     | 5,58156   | 3,88077   | -0,524325     | 0,731928      | 0,464213   | 0,7234     | no  |
| AN3279 | ChrVI_A_nidulans_FGSC_A4:1249954-1251520 | WT_5hasex | WT_veg | NOTEST | 1,91241   | 1,99538   | 0,0612728     | -0,0596305    | 0,95245    | 1          | no  |
| AN3280 | ChrVI_A_nidulans_FGSC_A4:1247563-1249055 | WT_5hasex | WT_veg | OK     | 1,3466    | 4,12203   | 1,61403       | -1,8292       | 0,0673697  | 0,219414   | no  |
| AN3282 | ChrVI_A_nidulans_FGSC_A4:1243525-1244908 | WT_5hasex | WT_veg | OK     | 15,4408   | 16,5503   | 0,100118      | -0,163866     | 0,869837   | 0,950202   | no  |
| AN3283 | ChrVI_A_nidulans_FGSC_A4:1240762-1241608 | WT_5hasex | WT_veg | NOTEST | 0         | 0         | 0             | 0             | 1          | 1          | no  |

## Supplementary table 1

|        |                                          |           |        |        |          |           |               |               |            |            |     |
|--------|------------------------------------------|-----------|--------|--------|----------|-----------|---------------|---------------|------------|------------|-----|
| AN3284 | ChrVI_A_nidulans_FGSC_A4:1236879-1238080 | WT_5hasex | WT_veg | OK     | 5,68909  | 7,42376   | 0,383954      | -0,528121     | 0,597415   | 0,811597   | no  |
| AN3285 | ChrVI_A_nidulans_FGSC_A4:1234918-1236310 | WT_5hasex | WT_veg | OK     | 7,67758  | 11,2366   | 0,549476      | -0,794509     | 0,426899   | 0,693828   | no  |
| AN3286 | ChrVI_A_nidulans_FGSC_A4:1231199-1232967 | WT_5hasex | WT_veg | OK     | 10,1724  | 15,3776   | 0,596164      | -0,967972     | 0,333058   | 0,609454   | no  |
| AN3287 | ChrVI_A_nidulans_FGSC_A4:1229134-1230916 | WT_5hasex | WT_veg | NOTEST | 0,305237 | 1,43488   | 2,23293       | -1,68384      | 0,0922133  | 1          | no  |
| AN3290 | ChrVI_A_nidulans_FGSC_A4:1214554-1217963 | WT_5hasex | WT_veg | OK     | 3,91465  | 7,13274   | 0,865572      | -1,22793      | 0,219472   | 0,480647   | no  |
| AN3291 | ChrVI_A_nidulans_FGSC_A4:1212385-1213909 | WT_5hasex | WT_veg | OK     | 8,14638  | 20,5136   | 1,33235       | -2,12931      | 0,0332284  | 0,131275   | no  |
| AN3292 | ChrVI_A_nidulans_FGSC_A4:1211376-1211941 | WT_5hasex | WT_veg | NOTEST | 0        | 0         | 0             | 0             | 1          | 1          | no  |
| AN3293 | ChrVI_A_nidulans_FGSC_A4:1209168-1209963 | WT_5hasex | WT_veg | OK     | 7,18447  | 16,5803   | 1,20652       | -1,71489      | 0,0863659  | 0,261744   | no  |
| AN3294 | ChrVI_A_nidulans_FGSC_A4:1207401-1209001 | WT_5hasex | WT_veg | OK     | 31,4735  | 57,0799   | 0,858846      | -1,66308      | 0,0962959  | 0,281882   | no  |
| AN3295 | ChrVI_A_nidulans_FGSC_A4:1205112-1206060 | WT_5hasex | WT_veg | OK     | 2,98649  | 4,17183   | 0,482229      | -0,572443     | 0,567022   | 0,793513   | no  |
| AN3296 | ChrVI_A_nidulans_FGSC_A4:1204246-1204803 | WT_5hasex | WT_veg | OK     | 12,546   | 19,6789   | 0,649423      | -0,916652     | 0,359325   | 0,634028   | no  |
| AN3298 | ChrVI_A_nidulans_FGSC_A4:1200539-1201472 | WT_5hasex | WT_veg | OK     | 1,81483  | 6,41478   | 1,82157       | -1,75433      | 0,0793737  | 0,246438   | no  |
| AN3299 | ChrVI_A_nidulans_FGSC_A4:1199508-1200275 | WT_5hasex | WT_veg | OK     | 11,5562  | 26,0531   | 1,17279       | -1,65         | 0,0989434  | 0,287137   | no  |
| AN3300 | ChrVI_A_nidulans_FGSC_A4:1195783-1197378 | WT_5hasex | WT_veg | OK     | 4,34141  | 9,02186   | 1,05526       | -1,54301      | 0,122827   | 0,33263    | no  |
| AN3301 | ChrVI_A_nidulans_FGSC_A4:1193758-1195433 | WT_5hasex | WT_veg | OK     | 10,3558  | 29,9329   | 1,53129       | -2,62147      | 0,00875522 | 0,0469016  | yes |
| AN3302 | ChrVI_A_nidulans_FGSC_A4:1191250-1192474 | WT_5hasex | WT_veg | NOTEST | 0,341299 | 0,670521  | 0,974247      | -0,541145     | 0,588408   | 1          | no  |
| AN3303 | ChrVI_A_nidulans_FGSC_A4:1189183-1190595 | WT_5hasex | WT_veg | OK     | 3,91412  | 0         | -1.79769e+308 | -1.79769e+308 | 0,0133822  | 0,0654889  | no  |
| AN3304 | ChrVI_A_nidulans_FGSC_A4:1185931-1188080 | WT_5hasex | WT_veg | OK     | 6,21759  | 0,558343  | -3,47713      | 2,46456       | 0,0137182  | 0,0667156  | no  |
| AN3305 | ChrVI_A_nidulans_FGSC_A4:1183090-1184275 | WT_5hasex | WT_veg | OK     | 18,4385  | 32,8952   | 0,835159      | -1,3982       | 0,162054   | 0,398197   | no  |
| AN3306 | ChrVI_A_nidulans_FGSC_A4:1178353-1181300 | WT_5hasex | WT_veg | NOTEST | 0,357763 | 0,45078   | 0,333423      | -0,207383     | 0,835711   | 1          | no  |
| AN3310 | ChrVI_A_nidulans_FGSC_A4:1160819-1161982 | WT_5hasex | WT_veg | OK     | 729,738  | 5336,73   | 2,8705        | -4,66227      | 3,1274E-06 | 5,1102E-05 | yes |
| AN3311 | ChrVI_A_nidulans_FGSC_A4:1156429-1157865 | WT_5hasex | WT_veg | OK     | 9,33206  | 16,4244   | 0,815577      | -1,09605      | 0,273058   | 0,545741   | no  |
| AN3312 | ChrVI_A_nidulans_FGSC_A4:1155220-1156304 | WT_5hasex | WT_veg | OK     | 38,8882  | 149,48    | 1,94254       | -3,17408      | 0,00150315 | 0,0110119  | yes |
| AN3313 | ChrVI_A_nidulans_FGSC_A4:1152134-1153435 | WT_5hasex | WT_veg | OK     | 16,2099  | 72,955    | 2,17013       | -3,81463      | 0,00013639 | 0,00143808 | yes |
| AN3314 | ChrVI_A_nidulans_FGSC_A4:1149169-1149970 | WT_5hasex | WT_veg | OK     | 9,15062  | 57,4297   | 2,64986       | -2,98424      | 0,00284281 | 0,0186842  | yes |
| AN3315 | ChrVI_A_nidulans_FGSC_A4:1145054-1147689 | WT_5hasex | WT_veg | OK     | 6,78589  | 1,04725   | -2,69593      | 2,80867       | 0,00497465 | 0,0296162  | yes |
| AN3316 | ChrVI_A_nidulans_FGSC_A4:1141969-1142776 | WT_5hasex | WT_veg | OK     | 0,402187 | 4,8445    | 3,59041       | -1,69077      | 0,0908798  | 0,270692   | no  |
| AN3317 | ChrVI_A_nidulans_FGSC_A4:1141182-1141868 | WT_5hasex | WT_veg | NOTEST | 0        | 0         | 0             | 0             | 1          | 1          | no  |
| AN3318 | ChrVI_A_nidulans_FGSC_A4:1134475-1140692 | WT_5hasex | WT_veg | NOTEST | 0,903362 | 1,31289   | 0,539371      | -0,645596     | 0,518541   | 1          | no  |
| AN3321 | ChrVI_A_nidulans_FGSC_A4:1117905-1119454 | WT_5hasex | WT_veg | OK     | 4,91193  | 17,0689   | 1,79701       | -2,6916       | 0,00711099 | 0,0396162  | yes |
| AN3322 | ChrVI_A_nidulans_FGSC_A4:1115171-1116644 | WT_5hasex | WT_veg | OK     | 2,38817  | 11,2748   | 2,23913       | -2,73323      | 0,00627156 | 0,0358349  | yes |
| AN3323 | ChrVI_A_nidulans_FGSC_A4:1111903-1112459 | WT_5hasex | WT_veg | NOTEST | 0        | 0         | 0             | 0             | 1          | 1          | no  |
| AN3324 | ChrVI_A_nidulans_FGSC_A4:1110372-1110992 | WT_5hasex | WT_veg | NOTEST | 0        | 0         | 0             | 0             | 1          | 1          | no  |
| AN3325 | ChrVI_A_nidulans_FGSC_A4:1103314-1107958 | WT_5hasex | WT_veg | NOTEST | 0,3162   | 0,508495  | 0,685394      | -0,687937     | 0,491492   | 1          | no  |
| AN3326 | ChrVI_A_nidulans_FGSC_A4:1101601-1102703 | WT_5hasex | WT_veg | NOTEST | 0        | 0         | 0             | 0             | 1          | 1          | no  |
| AN3327 | ChrVI_A_nidulans_FGSC_A4:1096694-1098125 | WT_5hasex | WT_veg | NOTEST | 1,47818  | 1,55938   | 0,0771532     | -0,0697265    | 0,944411   | 1          | no  |
| AN3328 | ChrVI_A_nidulans_FGSC_A4:1094155-1095467 | WT_5hasex | WT_veg | OK     | 82,6582  | 63,0152   | -0,391459     | 0,792948      | 0,427808   | 0,694547   | no  |
| AN3329 | ChrVI_A_nidulans_FGSC_A4:1081665-1085892 | WT_5hasex | WT_veg | NOTEST | 0,154144 | 0,763924  | 2,30915       | -2,00507      | 0,0449557  | 1          | no  |
| AN3330 | ChrVI_A_nidulans_FGSC_A4:1078117-1080761 | WT_5hasex | WT_veg | NOTEST | 0,21745  | 0,0666452 | -1,70611      | 0,557466      | 0,577209   | 1          | no  |
| AN3331 | ChrVI_A_nidulans_FGSC_A4:1075571-1076606 | WT_5hasex | WT_veg | NOTEST | 0,93194  | 1,0031    | 0,10616       | -0,0802825    | 0,936013   | 1          | no  |
| AN3332 | ChrVI_A_nidulans_FGSC_A4:1072861-1073383 | WT_5hasex | WT_veg | NOTEST | 0        | 0         | 0             | 0             | 1          | 1          | no  |
| AN3333 | ChrVI_A_nidulans_FGSC_A4:1070097-1072470 | WT_5hasex | WT_veg | NOTEST | 0,177551 | 0         | -1.79769e+308 | -1.79769e+308 | 0,133588   | 1          | no  |
| AN3334 | ChrVI_A_nidulans_FGSC_A4:1064589-1065717 | WT_5hasex | WT_veg | OK     | 20,6822  | 78,7164   | 1,92828       | -3,37007      | 0,00075148 | 0,00615108 | yes |
| AN3335 | ChrVI_A_nidulans_FGSC_A4:1059910-1060793 | WT_5hasex | WT_veg | NOTEST | 0,22395  | 0         | -1.79769e+308 | -1.79769e+308 | 0,165569   | 1          | no  |
| AN3336 | ChrVI_A_nidulans_FGSC_A4:1058426-1059431 | WT_5hasex | WT_veg | OK     | 15,8021  | 0,632131  | -4,64375      | 3,30349       | 0,00095491 | 0,00756214 | yes |
| AN3338 | ChrVI_A_nidulans_FGSC_A4:1051467-1052062 | WT_5hasex | WT_veg | NOTEST | 0        | 2,40184   | 1.79769e+308  | 1.79769e+308  | 0,123323   | 1          | no  |
| AN3339 | ChrVI_A_nidulans_FGSC_A4:1049592-1050621 | WT_5hasex | WT_veg | OK     | 10,1987  | 1,62811   | -2,64711      | 2,50203       | 0,0123484  | 0,0615214  | no  |
| AN3340 | ChrVI_A_nidulans_FGSC_A4:1042033-1047124 | WT_5hasex | WT_veg | NOTEST | 0,244766 | 0,820077  | 1,74436       | -1,63038      | 0,103022   | 1          | no  |
| AN3341 | ChrVI_A_nidulans_FGSC_A4:1039266-1041000 | WT_5hasex | WT_veg | OK     | 0,351559 | 8,42835   | 4,58341       | -4,45736      | 8,2976E-06 | 0,0001218  | yes |
| AN3342 | ChrVI_A_nidulans_FGSC_A4:1033272-1037426 | WT_5hasex | WT_veg | OK     | 3,55358  | 16,1188   | 2,1814        | -3,36832      | 0,00075627 | 0,00618352 | yes |
| AN3344 | ChrVI_A_nidulans_FGSC_A4:1023876-1024694 | WT_5hasex | WT_veg | OK     | 98,1833  | 107,717   | 0,133694      | -0,273058     | 0,784808   | 0,912344   | no  |
| AN3345 | ChrVI_A_nidulans_FGSC_A4:1021784-1023826 | WT_5hasex | WT_veg | OK     | 13,9013  | 50,0511   | 1,84818       | -3,09996      | 0,00193544 | 0,0135807  | yes |
| AN3346 | ChrVI_A_nidulans_FGSC_A4:1019349-1020678 | WT_5hasex | WT_veg | OK     | 10,06    | 37,3919   | 1,8941        | -2,90918      | 0,00362382 | 0,0228873  | yes |

## Supplementary table 1

|        |                                          |           |        |        |           |          |               |               |            |            |     |
|--------|------------------------------------------|-----------|--------|--------|-----------|----------|---------------|---------------|------------|------------|-----|
| AN3347 | ChrVI_A_nidulans_FGSC_A4:1016602-1018837 | WT_5hasex | WT_veg | OK     | 179,799   | 107,645  | -0,740097     | 1,25912       | 0,207986   | 0,465346   | no  |
| AN3348 | ChrVI_A_nidulans_FGSC_A4:1014030-1015687 | WT_5hasex | WT_veg | OK     | 85,2826   | 97,9747  | 0,200158      | -0,372557     | 0,709478   | 0,874819   | no  |
| AN3351 | ChrVI_A_nidulans_FGSC_A4:1000344-1002291 | WT_5hasex | WT_veg | OK     | 4,30969   | 2,08296  | -1,04895      | 1,16789       | 0,242852   | 0,509807   | no  |
| AN3353 | ChrVI_A_nidulans_FGSC_A4:992885-994365   | WT_5hasex | WT_veg | NOTEST | 0,446326  | 0,625136 | 0,486072      | -0,310046     | 0,756526   | 1          | no  |
| AN3354 | ChrVI_A_nidulans_FGSC_A4:991095-992305   | WT_5hasex | WT_veg | OK     | 36,0451   | 48,7535  | 0,435701      | -0,757411     | 0,448803   | 0,711346   | no  |
| AN3355 | ChrVI_A_nidulans_FGSC_A4:988841-990734   | WT_5hasex | WT_veg | OK     | 14,3459   | 28,4167  | 0,986103      | -1,60732      | 0,107985   | 0,305638   | no  |
| AN3356 | ChrVI_A_nidulans_FGSC_A4:984249-986704   | WT_5hasex | WT_veg | OK     | 58,691    | 164,47   | 1,48661       | -2,72805      | 0,00637101 | 0,0362963  | yes |
| AN3357 | ChrVI_A_nidulans_FGSC_A4:978181-979908   | WT_5hasex | WT_veg | OK     | 227,35    | 562,622  | 1,30725       | -2,56593      | 0,0102901  | 0,0532669  | no  |
| AN3358 | ChrVI_A_nidulans_FGSC_A4:974350-975690   | WT_5hasex | WT_veg | OK     | 10,4625   | 19,2117  | 0,87676       | -1,40731      | 0,159337   | 0,394425   | no  |
| AN3359 | ChrVI_A_nidulans_FGSC_A4:969082-970949   | WT_5hasex | WT_veg | OK     | 96,8682   | 398,99   | 2,04226       | -4,23903      | 2,2449E-05 | 0,00029549 | yes |
| AN3360 | ChrVI_A_nidulans_FGSC_A4:967280-968333   | WT_5hasex | WT_veg | OK     | 9,86329   | 6,93076  | -0,509056     | 0,68941       | 0,490565   | 0,742943   | no  |
| AN3366 | ChrVI_A_nidulans_FGSC_A4:946284-946813   | WT_5hasex | WT_veg | OK     | 69,9656   | 70,4137  | 0,0092103     | -0,0158114    | 0,987385   | 0,9955     | no  |
| AN3367 | ChrVI_A_nidulans_FGSC_A4:944941-945938   | WT_5hasex | WT_veg | OK     | 52,5263   | 119,813  | 1,18967       | -2,35726      | 0,0184101  | 0,0835696  | no  |
| AN3369 | ChrVI_A_nidulans_FGSC_A4:936106-938538   | WT_5hasex | WT_veg | OK     | 21,0265   | 9,99489  | -1,07294      | 2,01439       | 0,0439688  | 0,161699   | no  |
| AN3370 | ChrVI_A_nidulans_FGSC_A4:933996-935501   | WT_5hasex | WT_veg | OK     | 17,6826   | 17,1488  | -0,0442221    | 0,0778842     | 0,93792    | 0,976606   | no  |
| AN3371 | ChrVI_A_nidulans_FGSC_A4:931690-933514   | WT_5hasex | WT_veg | OK     | 49,3766   | 67,0168  | 0,440696      | -0,891279     | 0,372779   | 0,647592   | no  |
| AN3373 | ChrVI_A_nidulans_FGSC_A4:926303-928264   | WT_5hasex | WT_veg | OK     | 19,7916   | 60,6119  | 1,61471       | -3,19656      | 0,00139077 | 0,0103082  | yes |
| AN3374 | ChrVI_A_nidulans_FGSC_A4:923506-925231   | WT_5hasex | WT_veg | OK     | 11,1383   | 23,1113  | 1,05307       | -1,88863      | 0,0589411  | 0,199671   | no  |
| AN3375 | ChrVI_A_nidulans_FGSC_A4:920937-922820   | WT_5hasex | WT_veg | OK     | 98,7067   | 463,189  | 2,23038       | -4,50236      | 6,7205E-06 | 0,00010088 | yes |
| AN3377 | ChrVI_A_nidulans_FGSC_A4:915047-915887   | WT_5hasex | WT_veg | OK     | 9,05351   | 5,74686  | -0,655704     | 0,893732      | 0,371465   | 0,646223   | no  |
| AN3378 | ChrVI_A_nidulans_FGSC_A4:911237-912305   | WT_5hasex | WT_veg | OK     | 7,76674   | 19,4692  | 1,32581       | -2,03726      | 0,0416239  | 0,155297   | no  |
| AN3379 | ChrVI_A_nidulans_FGSC_A4:908258-909649   | WT_5hasex | WT_veg | OK     | 5,83772   | 29,5088  | 2,33767       | -3,04318      | 0,00234089 | 0,0159102  | yes |
| AN3380 | ChrVI_A_nidulans_FGSC_A4:902509-908036   | WT_5hasex | WT_veg | NOTEST | 0,285659  | 1,4763   | 2,36962       | -2,71565      | 0,00661466 | 1          | no  |
| AN3381 | ChrVI_A_nidulans_FGSC_A4:895605-901877   | WT_5hasex | WT_veg | OK     | 9,31054   | 1,50148  | -2,63248      | 4,93989       | 7,8167E-07 | 1,4766E-05 | yes |
| AN3383 | ChrVI_A_nidulans_FGSC_A4:891444-893306   | WT_5hasex | WT_veg | NOTEST | 0         | 0        | 0             | 0             | 1          | 1          | no  |
| AN3384 | ChrVI_A_nidulans_FGSC_A4:889710-891108   | WT_5hasex | WT_veg | OK     | 4,11619   | 4,5094   | 0,131626      | -0,174707     | 0,86131    | 0,946372   | no  |
| AN3385 | ChrVI_A_nidulans_FGSC_A4:886083-888092   | WT_5hasex | WT_veg | OK     | 9,44814   | 14,6343  | 0,631253      | -1,03597      | 0,300217   | 0,575821   | no  |
| AN3386 | ChrVI_A_nidulans_FGSC_A4:877707-885343   | WT_5hasex | WT_veg | NOTEST | 0,883255  | 0,999292 | 0,178078      | -0,24948      | 0,80299    | 1          | no  |
| AN3391 | ChrVI_A_nidulans_FGSC_A4:860878-863631   | WT_5hasex | WT_veg | NOTEST | 0,0932142 | 0,301162 | 1,69192       | -0,744246     | 0,456728   | 1          | no  |
| AN3392 | ChrVI_A_nidulans_FGSC_A4:857462-859840   | WT_5hasex | WT_veg | NOTEST | 1,78825   | 0,375505 | -2,25165      | 1,60049       | 0,10949    | 1          | no  |
| AN3395 | ChrVI_A_nidulans_FGSC_A4:845204-846617   | WT_5hasex | WT_veg | OK     | 5,63413   | 6,50984  | 0,20843       | -0,271523     | 0,785989   | 0,912639   | no  |
| AN3396 | ChrVI_A_nidulans_FGSC_A4:841204-844204   | WT_5hasex | WT_veg | OK     | 21,9492   | 14,7316  | -0,575258     | 1,17687       | 0,239247   | 0,505083   | no  |
| AN3397 | ChrVI_A_nidulans_FGSC_A4:836560-837946   | WT_5hasex | WT_veg | NOTEST | 0         | 0        | 0             | 0             | 1          | 1          | no  |
| AN3398 | ChrVI_A_nidulans_FGSC_A4:833975-835863   | WT_5hasex | WT_veg | NOTEST | 0,31288   | 0        | -1.79769e+308 | -1.79769e+308 | 0,107729   | 1          | no  |
| AN3399 | ChrVI_A_nidulans_FGSC_A4:831831-833456   | WT_5hasex | WT_veg | NOTEST | 0,167782  | 0        | -1.79769e+308 | -1.79769e+308 | 0,224063   | 1          | no  |
| AN3400 | ChrVI_A_nidulans_FGSC_A4:830663-831498   | WT_5hasex | WT_veg | NOTEST | 0,517011  | 1,10198  | 1,09183       | -0,621285     | 0,534412   | 1          | no  |
| AN3403 | ChrVI_A_nidulans_FGSC_A4:823058-823991   | WT_5hasex | WT_veg | OK     | 8,80082   | 1,1099   | -2,9872       | 2,54455       | 0,0109418  | 0,0559059  | no  |
| AN3404 | ChrVI_A_nidulans_FGSC_A4:820640-821392   | WT_5hasex | WT_veg | OK     | 2,76055   | 6,75919  | 1,29189       | -1,42682      | 0,15363    | 0,385084   | no  |
| AN3405 | ChrVI_A_nidulans_FGSC_A4:818161-819868   | WT_5hasex | WT_veg | OK     | 10,5294   | 10,2424  | -0,0398688    | 0,0679884     | 0,945795   | 0,979746   | no  |
| AN3406 | ChrVI_A_nidulans_FGSC_A4:816608-817459   | WT_5hasex | WT_veg | NOTEST | 0,890996  | 2,1931   | 1,29948       | -0,836092     | 0,403103   | 1          | no  |
| AN3407 | ChrVI_A_nidulans_FGSC_A4:812731-814982   | WT_5hasex | WT_veg | OK     | 3,65831   | 5,47864  | 0,582639      | -0,872359     | 0,383012   | 0,656793   | no  |
| AN3408 | ChrVI_A_nidulans_FGSC_A4:809368-811498   | WT_5hasex | WT_veg | OK     | 247,093   | 602,306  | 1,28544       | -2,50791      | 0,0121447  | 0,0607315  | no  |
| AN3409 | ChrVI_A_nidulans_FGSC_A4:805682-806747   | WT_5hasex | WT_veg | OK     | 8,87213   | 7,26749  | -0,287823     | 0,402652      | 0,687204   | 0,862536   | no  |
| AN3410 | ChrVI_A_nidulans_FGSC_A4:803229-805446   | WT_5hasex | WT_veg | NOTEST | 0,368462  | 0        | -1.79769e+308 | -1.79769e+308 | 0,0649158  | 1          | no  |
| AN3411 | ChrVI_A_nidulans_FGSC_A4:801380-802354   | WT_5hasex | WT_veg | OK     | 67,3108   | 210,716  | 1,64639       | -3,34398      | 0,00082584 | 0,00667014 | yes |
| AN3412 | ChrVI_A_nidulans_FGSC_A4:799953-800768   | WT_5hasex | WT_veg | OK     | 21,8968   | 17,1274  | -0,354414     | 0,547787      | 0,583838   | 0,803595   | no  |
| AN3413 | ChrVI_A_nidulans_FGSC_A4:798211-799517   | WT_5hasex | WT_veg | OK     | 968,73    | 1538,67  | 0,667519      | -1,14511      | 0,252164   | 0,521006   | no  |
| AN3414 | ChrVI_A_nidulans_FGSC_A4:795814-797104   | WT_5hasex | WT_veg | OK     | 6,44503   | 2,29741  | -1,48818      | 1,67795       | 0,0933564  | 0,27592    | no  |
| AN3415 | ChrVI_A_nidulans_FGSC_A4:794447-795567   | WT_5hasex | WT_veg | OK     | 10,416    | 9,60471  | -0,116982     | 0,177728      | 0,858937   | 0,945231   | no  |
| AN3419 | ChrVI_A_nidulans_FGSC_A4:782748-783577   | WT_5hasex | WT_veg | OK     | 41,0915   | 49,8696  | 0,279319      | -0,514015     | 0,607242   | 0,817543   | no  |
| AN3420 | ChrVI_A_nidulans_FGSC_A4:780407-781940   | WT_5hasex | WT_veg | OK     | 11,2504   | 19,6693  | 0,805973      | -1,40221      | 0,160852   | 0,396472   | no  |
| AN3421 | ChrVI_A_nidulans_FGSC_A4:778060-778923   | WT_5hasex | WT_veg | OK     | 61,0887   | 57,6815  | -0,0827965    | 0,150512      | 0,880361   | 0,954594   | no  |
| AN3422 | ChrVI_A_nidulans_FGSC_A4:772442-774987   | WT_5hasex | WT_veg | OK     | 28,8763   | 41,2601  | 0,514861      | -1,04259      | 0,297137   | 0,572406   | no  |

## Supplementary table 1

|        |                                          |           |        |        |          |          |               |               |            |            |     |
|--------|------------------------------------------|-----------|--------|--------|----------|----------|---------------|---------------|------------|------------|-----|
| AN3423 | ChrVI_A_nidulans_FGSC_A4:767292-771723   | WT_5hasex | WT_veg | OK     | 42,1494  | 79,1818  | 0,909658      | -1,8577       | 0,0632113  | 0,209619   | no  |
| AN3424 | ChrVI_A_nidulans_FGSC_A4:763344-766662   | WT_5hasex | WT_veg | OK     | 33,3019  | 51,4452  | 0,627432      | -1,29416      | 0,19561    | 0,44829    | no  |
| AN3425 | ChrVI_A_nidulans_FGSC_A4:761669-763221   | WT_5hasex | WT_veg | OK     | 50,8365  | 276,229  | 2,44193       | -5,08503      | 3,6756E-07 | 7,5179E-06 | yes |
| AN3427 | ChrVI_A_nidulans_FGSC_A4:756390-757684   | WT_5hasex | WT_veg | OK     | 20,8622  | 82,4688  | 1,98296       | -3,69277      | 0,00022183 | 0,00217846 | yes |
| AN3429 | ChrVI_A_nidulans_FGSC_A4:746800-747816   | WT_5hasex | WT_veg | OK     | 143,195  | 329,077  | 1,20045       | -2,2431       | 0,0248903  | 0,105025   | no  |
| AN3430 | ChrVI_A_nidulans_FGSC_A4:745347-746491   | WT_5hasex | WT_veg | OK     | 27,7228  | 38,3307  | 0,467426      | -0,886748     | 0,375214   | 0,649961   | no  |
| AN3431 | ChrVI_A_nidulans_FGSC_A4:743873-745238   | WT_5hasex | WT_veg | OK     | 92,969   | 112,767  | 0,278526      | -0,577353     | 0,563701   | 0,791284   | no  |
| AN3432 | ChrVI_A_nidulans_FGSC_A4:740769-742155   | WT_5hasex | WT_veg | OK     | 47,2877  | 67,4052  | 0,511397      | -1,02753      | 0,304172   | 0,580162   | no  |
| AN3433 | ChrVI_A_nidulans_FGSC_A4:736516-738218   | WT_5hasex | WT_veg | OK     | 462,849  | 1445,91  | 1,64336       | -2,2267       | 0,0259674  | 0,108668   | no  |
| AN3434 | ChrVI_A_nidulans_FGSC_A4:733342-734578   | WT_5hasex | WT_veg | OK     | 80,3781  | 146,648  | 0,867484      | -1,79102      | 0,0732908  | 0,23289    | no  |
| AN3438 | ChrVI_A_nidulans_FGSC_A4:718891-723652   | WT_5hasex | WT_veg | OK     | 29,2647  | 61,6177  | 1,07418       | -2,0942       | 0,0362419  | 0,140355   | no  |
| AN3439 | ChrVI_A_nidulans_FGSC_A4:716011-717343   | WT_5hasex | WT_veg | OK     | 49,9779  | 99,4962  | 0,993352      | -1,97156      | 0,0486598  | 0,17435    | no  |
| AN3442 | ChrVI_A_nidulans_FGSC_A4:706341-707886   | WT_5hasex | WT_veg | OK     | 91,8964  | 116,663  | 0,344273      | -0,669862     | 0,502946   | 0,751895   | no  |
| AN3445 | ChrVI_A_nidulans_FGSC_A4:690061-692561   | WT_5hasex | WT_veg | OK     | 40,2228  | 115,387  | 1,5204        | -3,15811      | 0,00158797 | 0,0115237  | yes |
| AN3446 | ChrVI_A_nidulans_FGSC_A4:688200-689661   | WT_5hasex | WT_veg | OK     | 2,03449  | 7,35574  | 1,85421       | -2,04126      | 0,0412252  | 0,15413    | no  |
| AN3447 | ChrVI_A_nidulans_FGSC_A4:685947-687789   | WT_5hasex | WT_veg | OK     | 53,0796  | 108,682  | 1,03388       | -2,10738      | 0,0350848  | 0,136784   | no  |
| AN3448 | ChrVI_A_nidulans_FGSC_A4:681782-684673   | WT_5hasex | WT_veg | OK     | 16,8959  | 39,387   | 1,22105       | -2,46176      | 0,0138258  | 0,0671702  | no  |
| AN3449 | ChrVI_A_nidulans_FGSC_A4:679740-680712   | WT_5hasex | WT_veg | OK     | 48,4799  | 74,4344  | 0,618584      | -1,23639      | 0,216312   | 0,476417   | no  |
| AN3450 | ChrVI_A_nidulans_FGSC_A4:677521-679563   | WT_5hasex | WT_veg | OK     | 31,6983  | 64,83    | 1,03226       | -2,10518      | 0,0352752  | 0,137332   | no  |
| AN3451 | ChrVI_A_nidulans_FGSC_A4:673079-677331   | WT_5hasex | WT_veg | OK     | 67,7252  | 125,757  | 0,892876      | -1,78858      | 0,0736828  | 0,233624   | no  |
| AN3452 | ChrVI_A_nidulans_FGSC_A4:671179-673039   | WT_5hasex | WT_veg | OK     | 45,0405  | 149,912  | 1,73482       | -3,31322      | 0,00092229 | 0,00734162 | yes |
| AN3453 | ChrVI_A_nidulans_FGSC_A4:668636-670503   | WT_5hasex | WT_veg | OK     | 29,753   | 105,441  | 1,82533       | -3,65008      | 0,00026216 | 0,00251989 | yes |
| AN3455 | ChrVI_A_nidulans_FGSC_A4:660826-664329   | WT_5hasex | WT_veg | OK     | 19,9741  | 59,5567  | 1,57614       | -3,12854      | 0,00175676 | 0,0125454  | yes |
| AN3456 | ChrVI_A_nidulans_FGSC_A4:656785-660611   | WT_5hasex | WT_veg | OK     | 44,8487  | 52,2594  | 0,220625      | -0,45019      | 0,652574   | 0,843156   | no  |
| AN3457 | ChrVI_A_nidulans_FGSC_A4:656785-660611   | WT_5hasex | WT_veg | OK     | 54,1693  | 76,0761  | 0,489967      | -0,976544     | 0,328795   | 0,605224   | no  |
| AN3458 | ChrVI_A_nidulans_FGSC_A4:655061-655844   | WT_5hasex | WT_veg | OK     | 64,8772  | 233,566  | 1,84805       | -3,64829      | 0,00026399 | 0,00253273 | yes |
| AN3459 | ChrVI_A_nidulans_FGSC_A4:652904-654893   | WT_5hasex | WT_veg | OK     | 153,104  | 389,274  | 1,34627       | -2,63855      | 0,00832613 | 0,0449939  | yes |
| AN3461 | ChrVI_A_nidulans_FGSC_A4:642371-643889   | WT_5hasex | WT_veg | OK     | 63,8767  | 90,0318  | 0,495145      | -1,00586      | 0,314483   | 0,590706   | no  |
| AN3462 | ChrVI_A_nidulans_FGSC_A4:640828-642206   | WT_5hasex | WT_veg | OK     | 79,8702  | 141,808  | 0,82821       | -1,70681      | 0,0878571  | 0,264683   | no  |
| AN3463 | ChrVI_A_nidulans_FGSC_A4:638891-640648   | WT_5hasex | WT_veg | OK     | 80,466   | 130,32   | 0,695606      | -1,40673      | 0,159507   | 0,394697   | no  |
| AN3464 | ChrVI_A_nidulans_FGSC_A4:637743-638775   | WT_5hasex | WT_veg | OK     | 42,6533  | 151,832  | 1,83174       | -3,57852      | 0,00034555 | 0,00317335 | yes |
| AN3465 | ChrVI_A_nidulans_FGSC_A4:634354-637153   | WT_5hasex | WT_veg | OK     | 10,09    | 35,9337  | 1,83241       | -2,65643      | 0,00789734 | 0,0431259  | yes |
| AN3467 | ChrVI_A_nidulans_FGSC_A4:633463-634167   | WT_5hasex | WT_veg | OK     | 380,757  | 631,314  | 0,729488      | -1,50356      | 0,132696   | 0,350021   | no  |
| AN3470 | ChrVI_A_nidulans_FGSC_A4:629417-631082   | WT_5hasex | WT_veg | OK     | 121,273  | 290,02   | 1,25789       | -2,56467      | 0,0103273  | 0,0534279  | no  |
| AN3471 | ChrII_A_nidulans_FGSC_A4:4068787-4069858 | WT_5hasex | WT_veg | OK     | 2,06599  | 2,50107  | 0,275712      | -0,287935     | 0,773396   | 0,907062   | no  |
| AN3472 | ChrII_A_nidulans_FGSC_A4:4062117-4066108 | WT_5hasex | WT_veg | NOTEST | 0        | 0        | 0             | 0             | 1          | 1          | no  |
| AN3473 | ChrII_A_nidulans_FGSC_A4:4059569-4060688 | WT_5hasex | WT_veg | NOTEST | 0,353374 | 0,928197 | 1,39323       | -0,879444     | 0,37916    | 1          | no  |
| AN3474 | ChrII_A_nidulans_FGSC_A4:4057134-4057848 | WT_5hasex | WT_veg | OK     | 7,3675   | 0        | -1.79769e+308 | -1.79769e+308 | 0,010891   | 0,0557064  | no  |
| AN3475 | ChrII_A_nidulans_FGSC_A4:4053927-4056395 | WT_5hasex | WT_veg | OK     | 3,36902  | 0,334682 | -3,33147      | 2,42185       | 0,0154418  | 0,0731217  | no  |
| AN3476 | ChrII_A_nidulans_FGSC_A4:4050724-4052116 | WT_5hasex | WT_veg | NOTEST | 1,03816  | 0,442728 | -1,22954      | 0,792484      | 0,428079   | 1          | no  |
| AN3477 | ChrII_A_nidulans_FGSC_A4:4049552-4050328 | WT_5hasex | WT_veg | NOTEST | 0        | 0        | 0             | 0             | 1          | 1          | no  |
| AN3478 | ChrII_A_nidulans_FGSC_A4:4046888-4048553 | WT_5hasex | WT_veg | OK     | 13,2369  | 22,3107  | 0,753168      | -1,36261      | 0,173005   | 0,415729   | no  |
| AN3479 | ChrII_A_nidulans_FGSC_A4:4044076-4046248 | WT_5hasex | WT_veg | OK     | 2,70174  | 0,463162 | -2,5443       | 2,17574       | 0,0295745  | 0,120044   | no  |
| AN3480 | ChrII_A_nidulans_FGSC_A4:4041023-4041785 | WT_5hasex | WT_veg | OK     | 20,7134  | 170,404  | 3,04032       | -5,05994      | 4,1938E-07 | 8,4492E-06 | yes |
| AN3481 | ChrII_A_nidulans_FGSC_A4:4038500-4039021 | WT_5hasex | WT_veg | OK     | 612,58   | 3139,57  | 2,3576        | -4,18699      | 2,8267E-05 | 0,00036359 | yes |
| AN3482 | ChrII_A_nidulans_FGSC_A4:4036696-4037949 | WT_5hasex | WT_veg | OK     | 11,9741  | 60,4396  | 2,33557       | -3,57607      | 0,0003488  | 0,00319987 | yes |
| AN3484 | ChrII_A_nidulans_FGSC_A4:4026025-4027827 | WT_5hasex | WT_veg | NOTEST | 0        | 0        | 0             | 0             | 1          | 1          | no  |
| AN3485 | ChrII_A_nidulans_FGSC_A4:4023319-4025086 | WT_5hasex | WT_veg | NOTEST | 0        | 0        | 0             | 0             | 1          | 1          | no  |
| AN3486 | ChrII_A_nidulans_FGSC_A4:4019023-4020449 | WT_5hasex | WT_veg | NOTEST | 0        | 0        | 0             | 0             | 1          | 1          | no  |
| AN3487 | ChrII_A_nidulans_FGSC_A4:4015769-4016851 | WT_5hasex | WT_veg | OK     | 3,05516  | 4,23557  | 0,471307      | -0,556441     | 0,577909   | 0,799736   | no  |
| AN3488 | ChrII_A_nidulans_FGSC_A4:4011013-4012845 | WT_5hasex | WT_veg | NOTEST | 0        | 0        | 0             | 0             | 1          | 1          | no  |
| AN3489 | ChrII_A_nidulans_FGSC_A4:4005967-4009117 | WT_5hasex | WT_veg | OK     | 10,8305  | 10,7818  | -0,00650029   | 0,0123949     | 0,990111   | 0,996405   | no  |
| AN3490 | ChrII_A_nidulans_FGSC_A4:4003672-4005548 | WT_5hasex | WT_veg | NOTEST | 0,513922 | 0,470463 | -0,127468     | 0,0847951     | 0,932424   | 1          | no  |



## Supplementary table 1

|        |                                          |           |        |        |          |           |               |               |            |            |     |
|--------|------------------------------------------|-----------|--------|--------|----------|-----------|---------------|---------------|------------|------------|-----|
| AN3491 | ChrII_A_nidulans_FGSC_A4:4001266-4003033 | WT_5hasex | WT_veg | OK     | 6,23056  | 6,27571   | 0,0104168     | -0,0158077    | 0,987388   | 0,9955     | no  |
| AN3493 | ChrII_A_nidulans_FGSC_A4:3998704-3999413 | WT_5hasex | WT_veg | OK     | 34,292   | 16,2945   | -1,07349      | 1,6961        | 0,0898672  | 0,268883   | no  |
| AN3494 | ChrII_A_nidulans_FGSC_A4:3996448-3997398 | WT_5hasex | WT_veg | NOTEST | 0        | 0         | 0             | 0             | 1          | 1          | no  |
| AN3498 | ChrII_A_nidulans_FGSC_A4:3976945-3979938 | WT_5hasex | WT_veg | OK     | 5,55177  | 9,79967   | 0,819784      | -1,26771      | 0,2049     | 0,461198   | no  |
| AN3499 | ChrII_A_nidulans_FGSC_A4:3975096-3976514 | WT_5hasex | WT_veg | OK     | 35,5667  | 38,6075   | 0,118354      | -0,23575      | 0,813627   | 0,925354   | no  |
| AN3500 | ChrII_A_nidulans_FGSC_A4:3972367-3974817 | WT_5hasex | WT_veg | OK     | 8,3441   | 19,4775   | 1,22298       | -2,12297      | 0,0337568  | 0,132975   | no  |
| AN3501 | ChrII_A_nidulans_FGSC_A4:3967030-3969139 | WT_5hasex | WT_veg | OK     | 6,47221  | 4,23869   | -0,610641     | 0,944579      | 0,344874   | 0,620266   | no  |
| AN3502 | ChrII_A_nidulans_FGSC_A4:3964348-3966882 | WT_5hasex | WT_veg | OK     | 3,42051  | 2,02825   | -0,753976     | 0,9236        | 0,355695   | 0,631064   | no  |
| AN3503 | ChrII_A_nidulans_FGSC_A4:3961877-3964000 | WT_5hasex | WT_veg | NOTEST | 0,105916 | 0,242809  | 1,1969        | -0,576036     | 0,564591   | 1          | no  |
| AN3504 | ChrII_A_nidulans_FGSC_A4:3958489-3961092 | WT_5hasex | WT_veg | NOTEST | 0,293774 | 0,0671235 | -2,12982      | 0,699873      | 0,484007   | 1          | no  |
| AN3505 | ChrII_A_nidulans_FGSC_A4:3956943-3958184 | WT_5hasex | WT_veg | OK     | 4,28926  | 14,6706   | 1,77413       | -2,38784      | 0,0169479  | 0,0786072  | no  |
| AN3506 | ChrII_A_nidulans_FGSC_A4:3952383-3953767 | WT_5hasex | WT_veg | OK     | 12,1798  | 63,3639   | 2,37918       | -4,04622      | 5,2051E-05 | 0,00061949 | yes |
| AN3507 | ChrII_A_nidulans_FGSC_A4:3951461-3952009 | WT_5hasex | WT_veg | NOTEST | 0        | 0         | 0             | 0             | 1          | 1          | no  |
| AN3508 | ChrII_A_nidulans_FGSC_A4:3950209-3951177 | WT_5hasex | WT_veg | NOTEST | 0        | 1,96902   | 1.79769e+308  | 1.79769e+308  | 0,036343   | 1          | no  |
| AN3509 | ChrII_A_nidulans_FGSC_A4:3948739-3949706 | WT_5hasex | WT_veg | NOTEST | 0,744936 | 3,85009   | 2,3697        | -2,2076       | 0,027272   | 1          | no  |
| AN3512 | ChrII_A_nidulans_FGSC_A4:3938538-3939048 | WT_5hasex | WT_veg | OK     | 98,8924  | 246,349   | 1,31677       | -2,42165      | 0,0154501  | 0,0731388  | no  |
| AN3513 | ChrII_A_nidulans_FGSC_A4:3934693-3938464 | WT_5hasex | WT_veg | OK     | 3,17602  | 3,72717   | 0,230861      | -0,363556     | 0,71619    | 0,87828    | no  |
| AN3514 | ChrII_A_nidulans_FGSC_A4:3933021-3933516 | WT_5hasex | WT_veg | NOTEST | 0,656493 | 0         | -1.79769e+308 | -1.79769e+308 | 0,224063   | 1          | no  |
| AN3515 | ChrII_A_nidulans_FGSC_A4:3927735-3929328 | WT_5hasex | WT_veg | NOTEST | 0,135416 | 0,640545  | 2,2419        | -0,995416     | 0,319534   | 1          | no  |
| AN3517 | ChrII_A_nidulans_FGSC_A4:3917843-3918914 | WT_5hasex | WT_veg | NOTEST | 0,269006 | 0         | -1.79769e+308 | -1.79769e+308 | 0,137528   | 1          | no  |
| AN3518 | ChrII_A_nidulans_FGSC_A4:3916246-3917721 | WT_5hasex | WT_veg | NOTEST | 0,561903 | 0,863925  | 0,620585      | -0,510233     | 0,609888   | 1          | no  |
| AN3519 | ChrII_A_nidulans_FGSC_A4:3913684-3915843 | WT_5hasex | WT_veg | NOTEST | 1,12885  | 3,1228    | 1,46798       | -1,77199      | 0,0763961  | 1          | no  |
| AN3520 | ChrII_A_nidulans_FGSC_A4:3908852-3910826 | WT_5hasex | WT_veg | OK     | 7,99854  | 6,54011   | -0,290423     | 0,444425      | 0,656736   | 0,845362   | no  |
| AN3521 | ChrII_A_nidulans_FGSC_A4:3907179-3908184 | WT_5hasex | WT_veg | NOTEST | 0        | 0         | 0             | 0             | 1          | 1          | no  |
| AN3523 | ChrII_A_nidulans_FGSC_A4:3902457-3903692 | WT_5hasex | WT_veg | NOTEST | 0,676596 | 2,38635   | 1,81844       | -1,45165      | 0,146599   | 1          | no  |
| AN3524 | ChrII_A_nidulans_FGSC_A4:3900692-3902062 | WT_5hasex | WT_veg | OK     | 36,1492  | 17,7961   | -1,0224       | 1,7787        | 0,0752889  | 0,237382   | no  |
| AN3525 | ChrII_A_nidulans_FGSC_A4:3894371-3897725 | WT_5hasex | WT_veg | NOTEST | 1,57799  | 1,23001   | -0,35942      | 0,39176       | 0,695236   | 1          | no  |
| AN3526 | ChrII_A_nidulans_FGSC_A4:3886421-3888378 | WT_5hasex | WT_veg | OK     | 16,669   | 70,7696   | 2,08596       | -3,24513      | 0,00117399 | 0,00896389 | yes |
| AN3528 | ChrII_A_nidulans_FGSC_A4:3878375-3879902 | WT_5hasex | WT_veg | OK     | 4,779    | 7,42334   | 0,63536       | -0,88439      | 0,376486   | 0,651109   | no  |
| AN3529 | ChrII_A_nidulans_FGSC_A4:3876401-3877299 | WT_5hasex | WT_veg | OK     | 20,1617  | 26,9968   | 0,421166      | -0,711562     | 0,476736   | 0,732694   | no  |
| AN3530 | ChrII_A_nidulans_FGSC_A4:3873132-3874642 | WT_5hasex | WT_veg | OK     | 14,7575  | 57,7194   | 1,96761       | -3,17706      | 0,00148778 | 0,0109192  | yes |
| AN3531 | ChrII_A_nidulans_FGSC_A4:3870382-3872050 | WT_5hasex | WT_veg | NOTEST | 0,897591 | 0         | -1.79769e+308 | -1.79769e+308 | 0,0472379  | 1          | no  |
| AN3532 | ChrII_A_nidulans_FGSC_A4:3867509-3868016 | WT_5hasex | WT_veg | NOTEST | 0,411868 | 0         | -1.79769e+308 | -1.79769e+308 | 0,165569   | 1          | no  |
| AN3533 | ChrII_A_nidulans_FGSC_A4:3864047-3865765 | WT_5hasex | WT_veg | NOTEST | 0        | 0         | 0             | 0             | 1          | 1          | no  |
| AN3534 | ChrII_A_nidulans_FGSC_A4:3861975-3863227 | WT_5hasex | WT_veg | NOTEST | 0        | 0         | 0             | 0             | 1          | 1          | no  |
| AN3535 | ChrII_A_nidulans_FGSC_A4:3852600-3853989 | WT_5hasex | WT_veg | NOTEST | 0        | 0         | 0             | 0             | 1          | 1          | no  |
| AN3536 | ChrII_A_nidulans_FGSC_A4:3850285-3852479 | WT_5hasex | WT_veg | NOTEST | 0,453915 | 0         | -1.79769e+308 | -1.79769e+308 | 0,0444135  | 1          | no  |
| AN3537 | ChrII_A_nidulans_FGSC_A4:3848893-3849793 | WT_5hasex | WT_veg | NOTEST | 0,845347 | 0,768514  | -0,137472     | 0,0863959     | 0,931152   | 1          | no  |
| AN3538 | ChrII_A_nidulans_FGSC_A4:3846369-3846945 | WT_5hasex | WT_veg | OK     | 0        | 6,09661   | 1.79769e+308  | 1.79769e+308  | 0,0037306  | 0,023443   | yes |
| AN3539 | ChrII_A_nidulans_FGSC_A4:3839483-3841421 | WT_5hasex | WT_veg | NOTEST | 0        | 0         | 0             | 0             | 1          | 1          | no  |
| AN3540 | ChrII_A_nidulans_FGSC_A4:3837573-3839109 | WT_5hasex | WT_veg | NOTEST | 0        | 0         | 0             | 0             | 1          | 1          | no  |
| AN3543 | ChrII_A_nidulans_FGSC_A4:3822958-3827911 | WT_5hasex | WT_veg | OK     | 5,01133  | 3,81252   | -0,394447     | 0,708269      | 0,478778   | 0,734131   | no  |
| AN3545 | ChrII_A_nidulans_FGSC_A4:3812499-3813739 | WT_5hasex | WT_veg | NOTEST | 0,305326 | 1,28869   | 2,07749       | -0,87392      | 0,382162   | 1          | no  |
| AN3546 | ChrII_A_nidulans_FGSC_A4:3804762-3807434 | WT_5hasex | WT_veg | OK     | 38,0191  | 81,2129   | 1,09499       | -2,28242      | 0,0224644  | 0,0971962  | no  |
| AN3547 | ChrII_A_nidulans_FGSC_A4:3797942-3802193 | WT_5hasex | WT_veg | OK     | 24,3888  | 47,2958   | 0,955492      | -1,98363      | 0,0472969  | 0,170869   | no  |
| AN3548 | ChrII_A_nidulans_FGSC_A4:3795472-3796193 | WT_5hasex | WT_veg | OK     | 3,20566  | 6,41151   | 1,00004       | -1,06083      | 0,288766   | 0,563333   | no  |
| AN3549 | ChrII_A_nidulans_FGSC_A4:3791604-3794990 | WT_5hasex | WT_veg | NOTEST | 0,112959 | 0         | -1.79769e+308 | -1.79769e+308 | 0,23809    | 1          | no  |
| AN3550 | ChrII_A_nidulans_FGSC_A4:3790403-3791412 | WT_5hasex | WT_veg | NOTEST | 0        | 0         | 0             | 0             | 1          | 1          | no  |
| AN3551 | ChrII_A_nidulans_FGSC_A4:3785465-3789016 | WT_5hasex | WT_veg | NOTEST | 1,1946   | 1,22301   | 0,0339045     | -0,0373565    | 0,970201   | 1          | no  |
| AN3552 | ChrII_A_nidulans_FGSC_A4:3783030-3785013 | WT_5hasex | WT_veg | OK     | 2,53096  | 3,52802   | 0,479173      | -0,569581     | 0,568962   | 0,794658   | no  |
| AN3553 | ChrII_A_nidulans_FGSC_A4:3781117-3782371 | WT_5hasex | WT_veg | NOTEST | 0,911467 | 1,30715   | 0,520162      | -0,415902     | 0,677482   | 1          | no  |
| AN3554 | ChrII_A_nidulans_FGSC_A4:3777529-3780401 | WT_5hasex | WT_veg | NOTEST | 0,460918 | 0,368275  | -0,323727     | 0,238397      | 0,811573   | 1          | no  |
| AN3555 | ChrII_A_nidulans_FGSC_A4:3774539-3775627 | WT_5hasex | WT_veg | OK     | 900,774  | 847,647   | -0,0877015    | 0,118588      | 0,905602   | 0,963925   | no  |

# Supplementary table 1

|        |                                          |           |        |        |          |          |               |               |            |            |     |
|--------|------------------------------------------|-----------|--------|--------|----------|----------|---------------|---------------|------------|------------|-----|
| AN3556 | ChrII_A_nidulans_FGSC_A4:3769806-3772363 | WT_5hasex | WT_veg | NOTEST | 0        | 0        | 0             | 0             | 1          | 1          | no  |
| AN3557 | ChrII_A_nidulans_FGSC_A4:3766665-3767897 | WT_5hasex | WT_veg | OK     | 11,465   | 62,6982  | 2,45118       | -3,52951      | 0,00041633 | 0,00371912 | yes |
| AN3558 | ChrII_A_nidulans_FGSC_A4:3765474-3766051 | WT_5hasex | WT_veg | OK     | 5,48725  | 50,0264  | 3,18854       | -3,89549      | 9,7999E-05 | 0,00107681 | yes |
| AN3559 | ChrII_A_nidulans_FGSC_A4:3763010-3764309 | WT_5hasex | WT_veg | OK     | 9,66202  | 18,3592  | 0,926107      | -1,42167      | 0,155122   | 0,387469   | no  |
| AN3560 | ChrII_A_nidulans_FGSC_A4:3758278-3760149 | WT_5hasex | WT_veg | NOTEST | 0,129346 | 0        | -1.79769e+308 | -1.79769e+308 | 0,224063   | 1          | no  |
| AN3561 | ChrII_A_nidulans_FGSC_A4:3755483-3757138 | WT_5hasex | WT_veg | NOTEST | 0        | 0,585504 | 1.79769e+308  | 1.79769e+308  | 0,123323   | 1          | no  |
| AN3562 | ChrII_A_nidulans_FGSC_A4:3753747-3755253 | WT_5hasex | WT_veg | NOTEST | 0,163438 | 1,16573  | 2,83441       | -1,37272      | 0,169839   | 1          | no  |
| AN3563 | ChrII_A_nidulans_FGSC_A4:3750752-3752271 | WT_5hasex | WT_veg | NOTEST | 0,378162 | 0,670521 | 0,826277      | -0,484605     | 0,627956   | 1          | no  |
| AN3564 | ChrII_A_nidulans_FGSC_A4:3747966-3748989 | WT_5hasex | WT_veg | NOTEST | 0,50182  | 0,938081 | 0,902543      | -0,521585     | 0,601959   | 1          | no  |
| AN3565 | ChrII_A_nidulans_FGSC_A4:3746560-3747672 | WT_5hasex | WT_veg | OK     | 3,81653  | 1,8016   | -1,08298      | 1,1005        | 0,271112   | 0,543353   | no  |
| AN3567 | ChrII_A_nidulans_FGSC_A4:3742204-3744065 | WT_5hasex | WT_veg | OK     | 8,80836  | 12,566   | 0,512582      | -0,799033     | 0,424271   | 0,692067   | no  |
| AN3568 | ChrII_A_nidulans_FGSC_A4:3738365-3739399 | WT_5hasex | WT_veg | NOTEST | 0        | 0        | 0             | 0             | 1          | 1          | no  |
| AN3570 | ChrII_A_nidulans_FGSC_A4:3732374-3733656 | WT_5hasex | WT_veg | NOTEST | 1,18508  | 2,61129  | 1,13978       | -1,16163      | 0,245384   | 1          | no  |
| AN3572 | ChrII_A_nidulans_FGSC_A4:3724896-3725293 | WT_5hasex | WT_veg | NOTEST | 0        | 0        | 0             | 0             | 1          | 1          | no  |
| AN3573 | ChrII_A_nidulans_FGSC_A4:3722161-3723899 | WT_5hasex | WT_veg | OK     | 7,64957  | 18,5305  | 1,27645       | -2,06569      | 0,0388579  | 0,147639   | no  |
| AN3574 | ChrII_A_nidulans_FGSC_A4:3719136-3720497 | WT_5hasex | WT_veg | OK     | 2,33497  | 0        | -1.79769e+308 | -1.79769e+308 | 0,0294109  | 0,119472   | no  |
| AN3575 | ChrII_A_nidulans_FGSC_A4:3717054-3718328 | WT_5hasex | WT_veg | NOTEST | 0,390103 | 0        | -1.79769e+308 | -1.79769e+308 | 0,114919   | 1          | no  |
| AN3576 | ChrII_A_nidulans_FGSC_A4:3714216-3715318 | WT_5hasex | WT_veg | OK     | 58,5289  | 55,248   | -0,0832271    | 0,165365      | 0,868657   | 0,949725   | no  |
| AN3577 | ChrII_A_nidulans_FGSC_A4:3712653-3713766 | WT_5hasex | WT_veg | OK     | 22,7654  | 31,6004  | 0,473103      | -0,833706     | 0,404447   | 0,675551   | no  |
| AN3578 | ChrII_A_nidulans_FGSC_A4:3710152-3712461 | WT_5hasex | WT_veg | OK     | 26,0225  | 46,1334  | 0,82605       | -1,65392      | 0,0981432  | 0,285526   | no  |
| AN3579 | ChrII_A_nidulans_FGSC_A4:3707229-3708833 | WT_5hasex | WT_veg | OK     | 42,685   | 92,2767  | 1,11224       | -2,24578      | 0,0247183  | 0,104474   | no  |
| AN3580 | ChrII_A_nidulans_FGSC_A4:3703084-3704388 | WT_5hasex | WT_veg | OK     | 12,3627  | 10,4079  | -0,248315     | 0,418967      | 0,67524    | 0,855615   | no  |
| AN3582 | ChrII_A_nidulans_FGSC_A4:3694954-3699191 | WT_5hasex | WT_veg | OK     | 24,3593  | 56,7031  | 1,21895       | -2,3937       | 0,0166795  | 0,0776301  | no  |
| AN3584 | ChrII_A_nidulans_FGSC_A4:3689117-3690819 | WT_5hasex | WT_veg | OK     | 45,3785  | 78,4028  | 0,788896      | -1,62209      | 0,104784   | 0,299198   | no  |
| AN3585 | ChrII_A_nidulans_FGSC_A4:3688177-3688711 | WT_5hasex | WT_veg | OK     | 39,9503  | 92,9834  | 1,21877       | -2,11575      | 0,0343661  | 0,134853   | no  |
| AN3586 | ChrII_A_nidulans_FGSC_A4:3685264-3687063 | WT_5hasex | WT_veg | OK     | 74,0525  | 93,5264  | 0,336825      | -0,665348     | 0,505828   | 0,753748   | no  |
| AN3588 | ChrII_A_nidulans_FGSC_A4:3676113-3677977 | WT_5hasex | WT_veg | OK     | 11,7781  | 19,8879  | 0,755783      | -1,34811      | 0,177622   | 0,422657   | no  |
| AN3589 | ChrII_A_nidulans_FGSC_A4:3674437-3676022 | WT_5hasex | WT_veg | OK     | 20,7096  | 25,2653  | 0,286852      | -0,54486      | 0,58585    | 0,804837   | no  |
| AN3590 | ChrII_A_nidulans_FGSC_A4:3670581-3673798 | WT_5hasex | WT_veg | OK     | 116,49   | 150,798  | 0,372414      | -0,68152      | 0,495543   | 0,746534   | no  |
| AN3591 | ChrII_A_nidulans_FGSC_A4:3670581-3673798 | WT_5hasex | WT_veg | OK     | 50,6853  | 47,8069  | -0,0843494    | 0,153014      | 0,878387   | 0,953677   | no  |
| AN3593 | ChrII_A_nidulans_FGSC_A4:3665826-3666862 | WT_5hasex | WT_veg | OK     | 49,4582  | 97,4805  | 0,978903      | -1,95114      | 0,0510405  | 0,180279   | no  |
| AN3595 | ChrII_A_nidulans_FGSC_A4:3662418-3663027 | WT_5hasex | WT_veg | OK     | 95,9971  | 314,098  | 1,71015       | -3,3564       | 0,00078963 | 0,00642022 | yes |
| AN3596 | ChrII_A_nidulans_FGSC_A4:3661008-3662170 | WT_5hasex | WT_veg | OK     | 26,0401  | 43,3559  | 0,735496      | -1,38161      | 0,167093   | 0,406235   | no  |
| AN3599 | ChrII_A_nidulans_FGSC_A4:3652208-3653391 | WT_5hasex | WT_veg | OK     | 37,0427  | 99,4073  | 1,42416       | -2,68954      | 0,00715512 | 0,039824   | yes |
| AN3600 | ChrII_A_nidulans_FGSC_A4:3649622-3651300 | WT_5hasex | WT_veg | OK     | 15,65    | 35,9952  | 1,20164       | -2,24771      | 0,0245945  | 0,104061   | no  |
| AN3601 | ChrII_A_nidulans_FGSC_A4:3646733-3647972 | WT_5hasex | WT_veg | OK     | 4,05445  | 12,5877  | 1,63443       | -2,26817      | 0,0233186  | 0,100036   | no  |
| AN3603 | ChrII_A_nidulans_FGSC_A4:3640591-3642137 | WT_5hasex | WT_veg | OK     | 16,1752  | 47,3224  | 1,54874       | -2,80674      | 0,00500455 | 0,0297705  | yes |
| AN3605 | ChrII_A_nidulans_FGSC_A4:3634882-3636044 | WT_5hasex | WT_veg | OK     | 17,8779  | 33,4324  | 0,903075      | -1,57778      | 0,114616   | 0,317581   | no  |
| AN3606 | ChrII_A_nidulans_FGSC_A4:3632755-3633841 | WT_5hasex | WT_veg | OK     | 72,7332  | 147,999  | 1,0249        | -1,86602      | 0,0620382  | 0,20679    | no  |
| AN3611 | ChrII_A_nidulans_FGSC_A4:3612561-3613633 | WT_5hasex | WT_veg | NOTEST | 0        | 0        | 0             | 0             | 1          | 1          | no  |
| AN3612 | ChrII_A_nidulans_FGSC_A4:3604240-3612137 | WT_5hasex | WT_veg | NOTEST | 0,374937 | 0        | -1.79769e+308 | -1.79769e+308 | 0,017128   | 1          | no  |
| AN3614 | ChrII_A_nidulans_FGSC_A4:3594286-3595376 | WT_5hasex | WT_veg | NOTEST | 0,208463 | 0        | -1.79769e+308 | -1.79769e+308 | 0,224063   | 1          | no  |
| AN3615 | ChrII_A_nidulans_FGSC_A4:3590145-3593344 | WT_5hasex | WT_veg | NOTEST | 0,129798 | 0        | -1.79769e+308 | -1.79769e+308 | 0,114919   | 1          | no  |
| AN3616 | ChrII_A_nidulans_FGSC_A4:3588472-3588834 | WT_5hasex | WT_veg | OK     | 189,101  | 270,483  | 0,51638       | -1,02812      | 0,303892   | 0,580002   | no  |
| AN3620 | ChrII_A_nidulans_FGSC_A4:3570540-3571149 | WT_5hasex | WT_veg | OK     | 14,5098  | 7,63955  | -0,925463     | 1,24505       | 0,213114   | 0,472162   | no  |
| AN3625 | ChrII_A_nidulans_FGSC_A4:3557028-3558326 | WT_5hasex | WT_veg | OK     | 19,0288  | 22,3525  | 0,232255      | -0,414942     | 0,678184   | 0,857417   | no  |
| AN3626 | ChrII_A_nidulans_FGSC_A4:3550894-3556382 | WT_5hasex | WT_veg | OK     | 38,9088  | 54,3843  | 0,483095      | -0,978986     | 0,327587   | 0,603891   | no  |
| AN3627 | ChrII_A_nidulans_FGSC_A4:3550894-3556382 | WT_5hasex | WT_veg | OK     | 120,488  | 2245,78  | 4,22026       | -6,74898      | 1,4889E-11 | 6,9108E-10 | yes |
| AN3628 | ChrII_A_nidulans_FGSC_A4:3547230-3550131 | WT_5hasex | WT_veg | OK     | 47,3198  | 66,094   | 0,482076      | -1,00215      | 0,316271   | 0,592294   | no  |
| AN3629 | ChrII_A_nidulans_FGSC_A4:3543636-3544778 | WT_5hasex | WT_veg | OK     | 54,1706  | 78,2417  | 0,530428      | -1,0841       | 0,278318   | 0,551584   | no  |
| AN3630 | ChrII_A_nidulans_FGSC_A4:3540854-3542135 | WT_5hasex | WT_veg | OK     | 37,0325  | 94,716   | 1,35482       | -2,69113      | 0,00712109 | 0,0396556  | yes |
| AN3631 | ChrII_A_nidulans_FGSC_A4:3539342-3540433 | WT_5hasex | WT_veg | NOTEST | 0        | 0        | 0             | 0             | 1          | 1          | no  |
| AN3632 | ChrII_A_nidulans_FGSC_A4:3536855-3538850 | WT_5hasex | WT_veg | OK     | 37,2541  | 60,7157  | 0,704672      | -1,32658      | 0,184647   | 0,433138   | no  |

## Supplementary table 1

|        |                                          |           |        |    |         |          |            |            |            |            |     |
|--------|------------------------------------------|-----------|--------|----|---------|----------|------------|------------|------------|------------|-----|
| AN3633 | ChrII_A_nidulans_FGSC_A4:3535085-3535940 | WT_5hasex | WT_veg | OK | 2,58752 | 5,80308  | 1,16525    | -1,35446   | 0,175589   | 0,419959   | no  |
| AN3634 | ChrII_A_nidulans_FGSC_A4:3531101-3532557 | WT_5hasex | WT_veg | OK | 56,6244 | 43,4561  | -0,381864  | 0,781323   | 0,434613   | 0,700196   | no  |
| AN3635 | ChrII_A_nidulans_FGSC_A4:3529757-3530892 | WT_5hasex | WT_veg | OK | 65,3338 | 153,563  | 1,23293    | -2,50962   | 0,0120861  | 0,0604905  | no  |
| AN3636 | ChrII_A_nidulans_FGSC_A4:3527981-3529720 | WT_5hasex | WT_veg | OK | 38,0277 | 77,4755  | 1,02669    | -2,11261   | 0,0346345  | 0,135675   | no  |
| AN3637 | ChrII_A_nidulans_FGSC_A4:3525422-3527514 | WT_5hasex | WT_veg | OK | 25,1353 | 16,0243  | -0,649455  | 1,2678     | 0,204869   | 0,461198   | no  |
| AN3638 | ChrII_A_nidulans_FGSC_A4:3524272-3525413 | WT_5hasex | WT_veg | OK | 155,205 | 25,0087  | -2,63367   | 5,29036    | 1,2208E-07 | 2,7826E-06 | yes |
| AN3639 | ChrII_A_nidulans_FGSC_A4:3522011-3523704 | WT_5hasex | WT_veg | OK | 38,1009 | 84,818   | 1,15454    | -2,09014   | 0,0366049  | 0,14124    | no  |
| AN3640 | ChrII_A_nidulans_FGSC_A4:3519042-3520647 | WT_5hasex | WT_veg | OK | 6,92539 | 8,50881  | 0,297061   | -0,462656  | 0,643611   | 0,838009   | no  |
| AN3642 | ChrII_A_nidulans_FGSC_A4:3512650-3514374 | WT_5hasex | WT_veg | OK | 47,7661 | 78,9427  | 0,724819   | -1,4558    | 0,145447   | 0,371646   | no  |
| AN3643 | ChrII_A_nidulans_FGSC_A4:3506665-3512051 | WT_5hasex | WT_veg | OK | 14,7567 | 12,28    | -0,265068  | 0,545183   | 0,585628   | 0,804672   | no  |
| AN3644 | ChrII_A_nidulans_FGSC_A4:3505425-3506190 | WT_5hasex | WT_veg | OK | 151,974 | 342,759  | 1,17337    | -2,4226    | 0,01541    | 0,0729856  | no  |
| AN3645 | ChrII_A_nidulans_FGSC_A4:3503902-3504951 | WT_5hasex | WT_veg | OK | 24,7045 | 24,4986  | -0,0120762 | 0,0216984  | 0,982689   | 0,99384    | no  |
| AN3646 | ChrII_A_nidulans_FGSC_A4:3502442-3503410 | WT_5hasex | WT_veg | OK | 71,7552 | 138,526  | 0,949004   | -1,94553   | 0,0517117  | 0,18178    | no  |
| AN3649 | ChrII_A_nidulans_FGSC_A4:3490885-3492495 | WT_5hasex | WT_veg | OK | 128,1   | 232,93   | 0,862624   | -1,69412   | 0,0902426  | 0,269668   | no  |
| AN3650 | ChrII_A_nidulans_FGSC_A4:3487103-3490492 | WT_5hasex | WT_veg | OK | 23,2406 | 61,9401  | 1,41423    | -2,91048   | 0,0036088  | 0,0228137  | yes |
| AN3651 | ChrII_A_nidulans_FGSC_A4:3485724-3486954 | WT_5hasex | WT_veg | OK | 31,4636 | 96,3108  | 1,61401    | -3,07672   | 0,00209292 | 0,0145109  | yes |
| AN3652 | ChrII_A_nidulans_FGSC_A4:3483746-3485367 | WT_5hasex | WT_veg | OK | 6,03642 | 30,2391  | 2,32465    | -3,60327   | 0,00031424 | 0,00293314 | yes |
| AN3655 | ChrII_A_nidulans_FGSC_A4:3477133-3478037 | WT_5hasex | WT_veg | OK | 288,314 | 322,707  | 0,162584   | -0,31258   | 0,7546     | 0,898113   | no  |
| AN3656 | ChrII_A_nidulans_FGSC_A4:3476011-3477084 | WT_5hasex | WT_veg | OK | 40,2656 | 75,0225  | 0,897776   | -1,72289   | 0,0849077  | 0,258517   | no  |
| AN3657 | ChrII_A_nidulans_FGSC_A4:3472573-3475766 | WT_5hasex | WT_veg | OK | 16,5543 | 34,6632  | 1,0662     | -2,13984   | 0,0323675  | 0,12869    | no  |
| AN3658 | ChrII_A_nidulans_FGSC_A4:3470832-3472397 | WT_5hasex | WT_veg | OK | 2,76528 | 3,62722  | 0,391437   | -0,514283  | 0,607054   | 0,817465   | no  |
| AN3659 | ChrII_A_nidulans_FGSC_A4:3467246-3469759 | WT_5hasex | WT_veg | OK | 37      | 31,9679  | -0,210898  | 0,421273   | 0,673556   | 0,854513   | no  |
| AN3661 | ChrII_A_nidulans_FGSC_A4:3459952-3461482 | WT_5hasex | WT_veg | OK | 9,29262 | 13,3981  | 0,527868   | -0,839483  | 0,401198   | 0,673016   | no  |
| AN3663 | ChrII_A_nidulans_FGSC_A4:3452415-3453451 | WT_5hasex | WT_veg | OK | 28,2629 | 94,3792  | 1,73956    | -3,24855   | 0,00115994 | 0,00887604 | yes |
| AN3664 | ChrII_A_nidulans_FGSC_A4:3450092-3452384 | WT_5hasex | WT_veg | OK | 212,141 | 483,696  | 1,18908    | -2,28416   | 0,0223623  | 0,0968773  | no  |
| AN3665 | ChrII_A_nidulans_FGSC_A4:3445490-3448854 | WT_5hasex | WT_veg | OK | 18,3465 | 28,8268  | 0,651905   | -1,33444   | 0,18206    | 0,429222   | no  |
| AN3666 | ChrII_A_nidulans_FGSC_A4:3443817-3444650 | WT_5hasex | WT_veg | OK | 13,3582 | 46,5305  | 1,80045    | -2,82321   | 0,00475448 | 0,0285814  | yes |
| AN3667 | ChrII_A_nidulans_FGSC_A4:3441382-3442943 | WT_5hasex | WT_veg | OK | 1,99573 | 5,08361  | 1,34894    | -1,7195    | 0,0855229  | 0,259837   | no  |
| AN3668 | ChrII_A_nidulans_FGSC_A4:3426618-3429361 | WT_5hasex | WT_veg | OK | 13,3867 | 23,657   | 0,82147    | -1,59257   | 0,111256   | 0,311525   | no  |
| AN3669 | ChrII_A_nidulans_FGSC_A4:3424128-3425670 | WT_5hasex | WT_veg | OK | 33,6568 | 89,613   | 1,41281    | -2,81152   | 0,00493085 | 0,0294192  | yes |
| AN3670 | ChrII_A_nidulans_FGSC_A4:3422179-3423316 | WT_5hasex | WT_veg | OK | 55,5764 | 53,8758  | -0,0448351 | 0,0893165  | 0,92883    | 0,973087   | no  |
| AN3671 | ChrII_A_nidulans_FGSC_A4:3420307-3421042 | WT_5hasex | WT_veg | OK | 53,8871 | 56,1728  | 0,0599294  | -0,115736  | 0,907861   | 0,964711   | no  |
| AN3672 | ChrII_A_nidulans_FGSC_A4:3416906-3418081 | WT_5hasex | WT_veg | OK | 20,8711 | 35,0995  | 0,749943   | -1,34343   | 0,179133   | 0,424858   | no  |
| AN3673 | ChrII_A_nidulans_FGSC_A4:3415822-3416388 | WT_5hasex | WT_veg | OK | 67,6628 | 123,21   | 0,864688   | -1,55769   | 0,119307   | 0,326436   | no  |
| AN3674 | ChrII_A_nidulans_FGSC_A4:3408633-3411611 | WT_5hasex | WT_veg | OK | 188,221 | 318,702  | 0,759782   | -1,40051   | 0,16136    | 0,397119   | no  |
| AN3677 | ChrII_A_nidulans_FGSC_A4:3401918-3403753 | WT_5hasex | WT_veg | OK | 8,80947 | 25,3753  | 1,5263     | -2,62173   | 0,00874857 | 0,0468711  | yes |
| AN3678 | ChrII_A_nidulans_FGSC_A4:3399065-3401528 | WT_5hasex | WT_veg | OK | 31,8963 | 44,3296  | 0,474883   | -0,979995  | 0,327089   | 0,603376   | no  |
| AN3679 | ChrII_A_nidulans_FGSC_A4:3396757-3397803 | WT_5hasex | WT_veg | OK | 109,386 | 362,083  | 1,72689    | -3,21782   | 0,0012917  | 0,00969878 | yes |
| AN3680 | ChrII_A_nidulans_FGSC_A4:3395887-3396418 | WT_5hasex | WT_veg | OK | 787,048 | 4641,4   | 2,56004    | -4,46876   | 7,8675E-06 | 0,00011633 | yes |
| AN3681 | ChrII_A_nidulans_FGSC_A4:3392941-3393899 | WT_5hasex | WT_veg | OK | 77,3294 | 432,941  | 2,48508    | -5,09858   | 3,4222E-07 | 7,0575E-06 | yes |
| AN3683 | ChrII_A_nidulans_FGSC_A4:3386589-3389241 | WT_5hasex | WT_veg | OK | 21,2661 | 19,6603  | -0,113266  | 0,227991   | 0,819653   | 0,927698   | no  |
| AN3684 | ChrII_A_nidulans_FGSC_A4:3382761-3384753 | WT_5hasex | WT_veg | OK | 14,4731 | 29,4589  | 1,02533    | -1,86535   | 0,0621317  | 0,207049   | no  |
| AN3686 | ChrII_A_nidulans_FGSC_A4:3374684-3375191 | WT_5hasex | WT_veg | OK | 86,572  | 175,687  | 1,02104    | -1,93298   | 0,0532387  | 0,185481   | no  |
| AN3687 | ChrII_A_nidulans_FGSC_A4:3373590-3374608 | WT_5hasex | WT_veg | OK | 167,286 | 419,395  | 1,32599    | -2,77475   | 0,00552445 | 0,0322401  | yes |
| AN3689 | ChrII_A_nidulans_FGSC_A4:3363175-3365499 | WT_5hasex | WT_veg | OK | 68,7701 | 176,541  | 1,36015    | -2,83324   | 0,00460782 | 0,0278563  | yes |
| AN3690 | ChrII_A_nidulans_FGSC_A4:3360419-3361865 | WT_5hasex | WT_veg | OK | 24,7412 | 25,2626  | 0,0300916  | -0,0530506 | 0,957692   | 0,984294   | no  |
| AN3691 | ChrII_A_nidulans_FGSC_A4:3356894-3359429 | WT_5hasex | WT_veg | OK | 23,2064 | 84,6951  | 1,86775    | -3,82325   | 0,00013171 | 0,00139653 | yes |
| AN3692 | ChrII_A_nidulans_FGSC_A4:3354942-3356223 | WT_5hasex | WT_veg | OK | 32,5809 | 60,0311  | 0,881683   | -1,73085   | 0,0834786  | 0,255412   | no  |
| AN3693 | ChrII_A_nidulans_FGSC_A4:3351520-3353606 | WT_5hasex | WT_veg | OK | 14,2797 | 31,6361  | 1,1476     | -2,15794   | 0,0309322  | 0,124312   | no  |
| AN3694 | ChrII_A_nidulans_FGSC_A4:3349787-3350909 | WT_5hasex | WT_veg | OK | 3,58992 | 6,19299  | 0,786687   | -1,0282    | 0,303857   | 0,579979   | no  |
| AN3695 | ChrII_A_nidulans_FGSC_A4:3347285-3349177 | WT_5hasex | WT_veg | OK | 65,155  | 159,882  | 1,29506    | -2,70702   | 0,00678904 | 0,0382249  | yes |
| AN3696 | ChrII_A_nidulans_FGSC_A4:3344142-3346977 | WT_5hasex | WT_veg | OK | 161,492 | 376,567  | 1,22144    | -2,35414   | 0,0185656  | 0,0840858  | no  |
| AN3697 | ChrII_A_nidulans_FGSC_A4:3342187-3343794 | WT_5hasex | WT_veg | OK | 2,97684 | 0,714773 | -2,05822   | 1,33938    | 0,180448   | 0,426952   | no  |

## Supplementary table 1

|        |                                          |           |        |        |          |          |           |           |            |            |     |
|--------|------------------------------------------|-----------|--------|--------|----------|----------|-----------|-----------|------------|------------|-----|
| AN3698 | ChrII_A_nidulans_FGSC_A4:3339974-3341603 | WT_5hasex | WT_veg | NOTEST | 0,579905 | 0,993333 | 0,776461  | -0,669537 | 0,503153   | 1          | no  |
| AN3699 | ChrII_A_nidulans_FGSC_A4:3337089-3339691 | WT_5hasex | WT_veg | NOTEST | 1,1907   | 2,69915  | 1,1807    | -1,26832  | 0,204685   | 1          | no  |
| AN3700 | ChrII_A_nidulans_FGSC_A4:3335790-3336954 | WT_5hasex | WT_veg | NOTEST | 0        | 0        | 0         | 0         | 1          | 1          | no  |
| AN3701 | ChrII_A_nidulans_FGSC_A4:3334694-3335569 | WT_5hasex | WT_veg | NOTEST | 1,2346   | 2,24218  | 0,860859  | -0,748043 | 0,454434   | 1          | no  |
| AN3702 | ChrII_A_nidulans_FGSC_A4:3329560-3333138 | WT_5hasex | WT_veg | OK     | 48,275   | 74,2895  | 0,621881  | -1,28844  | 0,197594   | 0,451228   | no  |
| AN3703 | ChrII_A_nidulans_FGSC_A4:3327356-3327970 | WT_5hasex | WT_veg | OK     | 680,41   | 4779,46  | 2,81237   | -5,25762  | 1,4594E-07 | 3,2779E-06 | yes |
| AN3704 | ChrII_A_nidulans_FGSC_A4:3325780-3327345 | WT_5hasex | WT_veg | OK     | 19,2737  | 50,0419  | 1,3765    | -2,37438  | 0,0175785  | 0,0807174  | no  |
| AN3706 | ChrII_A_nidulans_FGSC_A4:3320786-3321720 | WT_5hasex | WT_veg | OK     | 1916,66  | 2136,5   | 0,156652  | -0,25554  | 0,798306   | 0,918689   | no  |
| AN3707 | ChrII_A_nidulans_FGSC_A4:3319099-3320731 | WT_5hasex | WT_veg | OK     | 165,98   | 181,599  | 0,129752  | -0,203464 | 0,838772   | 0,93603    | no  |
| AN3708 | ChrII_A_nidulans_FGSC_A4:3317522-3318680 | WT_5hasex | WT_veg | OK     | 409,752  | 619,894  | 0,59727   | -1,19396  | 0,232493   | 0,496986   | no  |
| AN3709 | ChrII_A_nidulans_FGSC_A4:3315469-3317474 | WT_5hasex | WT_veg | OK     | 49,0094  | 54,0827  | 0,142108  | -0,293717 | 0,768974   | 0,905213   | no  |
| AN3710 | ChrII_A_nidulans_FGSC_A4:3313694-3314820 | WT_5hasex | WT_veg | OK     | 24,4666  | 25,803   | 0,0767247 | -0,138982 | 0,889464   | 0,958134   | no  |
| AN3711 | ChrII_A_nidulans_FGSC_A4:3311109-3313039 | WT_5hasex | WT_veg | OK     | 36,5967  | 58,6099  | 0,67943   | -1,37962  | 0,167704   | 0,407193   | no  |
| AN3712 | ChrII_A_nidulans_FGSC_A4:3306173-3307252 | WT_5hasex | WT_veg | OK     | 252,37   | 506,739  | 1,0057    | -2,04477  | 0,0408774  | 0,153136   | no  |
| AN3713 | ChrII_A_nidulans_FGSC_A4:3303958-3304527 | WT_5hasex | WT_veg | OK     | 7,51092  | 12,2778  | 0,708988  | -0,820503 | 0,411929   | 0,681709   | no  |
| AN3714 | ChrII_A_nidulans_FGSC_A4:3300656-3302862 | WT_5hasex | WT_veg | OK     | 54,2613  | 100,307  | 0,886422  | -1,70238  | 0,0886847  | 0,26641    | no  |
| AN3716 | ChrII_A_nidulans_FGSC_A4:3294279-3295649 | WT_5hasex | WT_veg | OK     | 135,049  | 208,237  | 0,624738  | -1,29079  | 0,196778   | 0,45003    | no  |
| AN3717 | ChrII_A_nidulans_FGSC_A4:3293117-3293949 | WT_5hasex | WT_veg | OK     | 7,24704  | 13,3916  | 0,885863  | -1,2343   | 0,21709    | 0,477319   | no  |
| AN3720 | ChrII_A_nidulans_FGSC_A4:3282576-3285634 | WT_5hasex | WT_veg | OK     | 52,5477  | 80,5397  | 0,616074  | -1,23896  | 0,215361   | 0,475153   | no  |
| AN3721 | ChrII_A_nidulans_FGSC_A4:3279150-3281517 | WT_5hasex | WT_veg | OK     | 25,7011  | 23,1782  | -0,149063 | 0,302845  | 0,762008   | 0,901819   | no  |
| AN3722 | ChrII_A_nidulans_FGSC_A4:3277093-3278731 | WT_5hasex | WT_veg | OK     | 4,1329   | 5,32598  | 0,365893  | -0,491959 | 0,622748   | 0,825698   | no  |
| AN3724 | ChrII_A_nidulans_FGSC_A4:3271196-3272054 | WT_5hasex | WT_veg | OK     | 9,71118  | 20,3658  | 1,06843   | -1,61277  | 0,106794   | 0,303334   | no  |
| AN3731 | ChrII_A_nidulans_FGSC_A4:3246030-3248262 | WT_5hasex | WT_veg | OK     | 18,7157  | 30,3181  | 0,695927  | -1,34881  | 0,177397   | 0,422428   | no  |
| AN3732 | ChrII_A_nidulans_FGSC_A4:3243080-3245799 | WT_5hasex | WT_veg | OK     | 37,9223  | 62,7877  | 0,727438  | -1,52057  | 0,128368   | 0,342414   | no  |
| AN3734 | ChrII_A_nidulans_FGSC_A4:3236148-3239072 | WT_5hasex | WT_veg | OK     | 46,6065  | 37,7223  | -0,305113 | 0,631574  | 0,527665   | 0,768057   | no  |
| AN3735 | ChrII_A_nidulans_FGSC_A4:3229742-3233606 | WT_5hasex | WT_veg | OK     | 15,3451  | 17,2921  | 0,172333  | -0,349011 | 0,727081   | 0,884085   | no  |
| AN3736 | ChrII_A_nidulans_FGSC_A4:3227197-3228775 | WT_5hasex | WT_veg | OK     | 5,33869  | 26,8617  | 2,33099   | -3,6542   | 0,00025799 | 0,00248377 | yes |
| AN3737 | ChrII_A_nidulans_FGSC_A4:3225312-3227013 | WT_5hasex | WT_veg | OK     | 13,6066  | 32,7856  | 1,26875   | -2,27853  | 0,0226949  | 0,0979619  | no  |
| AN3738 | ChrII_A_nidulans_FGSC_A4:3224139-3225038 | WT_5hasex | WT_veg | OK     | 96,8266  | 123,832  | 0,354905  | -0,711479 | 0,476788   | 0,732708   | no  |
| AN3739 | ChrII_A_nidulans_FGSC_A4:3219596-3222043 | WT_5hasex | WT_veg | OK     | 180,614  | 331,817  | 0,877473  | -1,74993  | 0,0801307  | 0,248009   | no  |
| AN3740 | ChrII_A_nidulans_FGSC_A4:3218387-3219596 | WT_5hasex | WT_veg | OK     | 11,3459  | 10,1875  | -0,155373 | 0,246874  | 0,805006   | 0,921664   | no  |
| AN3742 | ChrII_A_nidulans_FGSC_A4:3214186-3215705 | WT_5hasex | WT_veg | OK     | 2,46057  | 6,75805  | 1,45762   | -1,83616  | 0,0663343  | 0,216955   | no  |
| AN3743 | ChrII_A_nidulans_FGSC_A4:3209527-3213359 | WT_5hasex | WT_veg | OK     | 9,47624  | 19,952   | 1,07414   | -2,05699  | 0,0396874  | 0,150007   | no  |
| AN3744 | ChrII_A_nidulans_FGSC_A4:3207178-3208943 | WT_5hasex | WT_veg | OK     | 78,4361  | 156,065  | 0,992556  | -2,02191  | 0,0431861  | 0,159571   | no  |
| AN3745 | ChrII_A_nidulans_FGSC_A4:3206210-3206927 | WT_5hasex | WT_veg | OK     | 47,7083  | 237,929  | 2,31822   | -4,26093  | 2,0358E-05 | 0,0002707  | yes |
| AN3746 | ChrII_A_nidulans_FGSC_A4:3203243-3205308 | WT_5hasex | WT_veg | OK     | 25,7769  | 40,3907  | 0,647945  | -1,31556  | 0,188323   | 0,438192   | no  |
| AN3747 | ChrII_A_nidulans_FGSC_A4:3198599-3200194 | WT_5hasex | WT_veg | OK     | 132,167  | 360,509  | 1,44767   | -2,94909  | 0,00318711 | 0,0205577  | yes |
| AN3748 | ChrII_A_nidulans_FGSC_A4:3192361-3193708 | WT_5hasex | WT_veg | OK     | 91,6307  | 145,65   | 0,668599  | -1,38939  | 0,164715   | 0,402521   | no  |
| AN3749 | ChrII_A_nidulans_FGSC_A4:3187415-3190823 | WT_5hasex | WT_veg | OK     | 11,3807  | 7,57253  | -0,587746 | 1,14072   | 0,253987   | 0,523283   | no  |
| AN3750 | ChrII_A_nidulans_FGSC_A4:3184956-3186731 | WT_5hasex | WT_veg | NOTEST | 0,74394  | 1,27891  | 0,781652  | -0,779644 | 0,4356     | 1          | no  |
| AN3751 | ChrII_A_nidulans_FGSC_A4:3179477-3182344 | WT_5hasex | WT_veg | OK     | 13,0757  | 63,238   | 2,2739    | -4,51517  | 6,3267E-06 | 9,5598E-05 | yes |
| AN3752 | ChrII_A_nidulans_FGSC_A4:3175977-3178845 | WT_5hasex | WT_veg | OK     | 99,146   | 200,625  | 1,01688   | -2,0317   | 0,0421838  | 0,15683    | no  |
| AN3753 | ChrII_A_nidulans_FGSC_A4:3171282-3175196 | WT_5hasex | WT_veg | OK     | 10,5133  | 9,24611  | -0,185303 | 0,358748  | 0,719783   | 0,879989   | no  |
| AN3755 | ChrII_A_nidulans_FGSC_A4:3156050-3157689 | WT_5hasex | WT_veg | OK     | 43,9559  | 66,0688  | 0,587913  | -1,21882  | 0,222911   | 0,484789   | no  |
| AN3756 | ChrII_A_nidulans_FGSC_A4:3153422-3154525 | WT_5hasex | WT_veg | OK     | 281,25   | 349,447  | 0,313221  | -0,635926 | 0,524825   | 0,766389   | no  |
| AN3757 | ChrII_A_nidulans_FGSC_A4:3151910-3152972 | WT_5hasex | WT_veg | OK     | 35,6069  | 46,6527  | 0,389803  | -0,731185 | 0,464666   | 0,723802   | no  |
| AN3758 | ChrII_A_nidulans_FGSC_A4:3150262-3151360 | WT_5hasex | WT_veg | OK     | 29,3051  | 37,8344  | 0,368547  | -0,689551 | 0,490477   | 0,742896   | no  |
| AN3759 | ChrII_A_nidulans_FGSC_A4:3148886-3149649 | WT_5hasex | WT_veg | OK     | 57,9478  | 35,6033  | -0,702741 | 1,35737   | 0,174665   | 0,418509   | no  |
| AN3760 | ChrII_A_nidulans_FGSC_A4:3145392-3147661 | WT_5hasex | WT_veg | OK     | 26,7764  | 63,2448  | 1,23998   | -2,42458  | 0,0153263  | 0,0726812  | no  |
| AN3761 | ChrII_A_nidulans_FGSC_A4:3141347-3144917 | WT_5hasex | WT_veg | OK     | 21,0363  | 78,5795  | 1,90127   | -3,74215  | 0,00018245 | 0,00184274 | yes |
| AN3762 | ChrII_A_nidulans_FGSC_A4:3138702-3139238 | WT_5hasex | WT_veg | OK     | 5,55305  | 8,95146  | 0,688843  | -0,691319 | 0,489365   | 0,742285   | no  |
| AN3763 | ChrII_A_nidulans_FGSC_A4:3135578-3137486 | WT_5hasex | WT_veg | OK     | 38,6168  | 23,0037  | -0,747362 | 1,44206   | 0,149285   | 0,377805   | no  |
| AN3764 | ChrII_A_nidulans_FGSC_A4:3131985-3134492 | WT_5hasex | WT_veg | OK     | 2,76289  | 2,06434  | -0,420501 | 0,559309  | 0,575951   | 0,798629   | no  |

## Supplementary table 1

|        |                                          |           |        |        |          |          |               |               |            |            |     |
|--------|------------------------------------------|-----------|--------|--------|----------|----------|---------------|---------------|------------|------------|-----|
| AN3768 | ChrII_A_nidulans_FGSC_A4:3108684-3110983 | WT_5hasex | WT_veg | OK     | 26,6789  | 67,7817  | 1,3452        | -2,69496      | 0,0070398  | 0,0392965  | yes |
| AN3769 | ChrII_A_nidulans_FGSC_A4:3104580-3106371 | WT_5hasex | WT_veg | OK     | 2,19201  | 0,114508 | -4,25873      | 1,42259       | 0,154854   | 0,386979   | no  |
| AN3770 | ChrII_A_nidulans_FGSC_A4:3102710-3104011 | WT_5hasex | WT_veg | OK     | 12,9385  | 19,1311  | 0,564252      | -0,954778     | 0,33969    | 0,615537   | no  |
| AN3771 | ChrII_A_nidulans_FGSC_A4:3101497-3102549 | WT_5hasex | WT_veg | OK     | 53,3184  | 119,665  | 1,16629       | -2,34065      | 0,0192501  | 0,0864093  | no  |
| AN3773 | ChrII_A_nidulans_FGSC_A4:3096851-3099236 | WT_5hasex | WT_veg | OK     | 30,2138  | 82,6941  | 1,45258       | -2,87937      | 0,00398472 | 0,0247143  | yes |
| AN3774 | ChrII_A_nidulans_FGSC_A4:3092041-3092820 | WT_5hasex | WT_veg | NOTEST | 0        | 1,19353  | 1.79769e+308  | 1.79769e+308  | 0,123323   | 1          | no  |
| AN3775 | ChrII_A_nidulans_FGSC_A4:3089831-3090827 | WT_5hasex | WT_veg | NOTEST | 0,240425 | 0        | -1.79769e+308 | -1.79769e+308 | 0,224063   | 1          | no  |
| AN3776 | ChrII_A_nidulans_FGSC_A4:3087781-3089461 | WT_5hasex | WT_veg | NOTEST | 1,30454  | 3,0255   | 1,21364       | -1,3714       | 0,17025    | 1          | no  |
| AN3779 | ChrII_A_nidulans_FGSC_A4:3079860-3081228 | WT_5hasex | WT_veg | OK     | 30,5835  | 38,4752  | 0,331175      | -0,648577     | 0,516612   | 0,760745   | no  |
| AN3780 | ChrII_A_nidulans_FGSC_A4:3075839-3078386 | WT_5hasex | WT_veg | NOTEST | 0,360489 | 0        | -1.79769e+308 | -1.79769e+308 | 0,0504329  | 1          | no  |
| AN3781 | ChrII_A_nidulans_FGSC_A4:3073518-3075721 | WT_5hasex | WT_veg | OK     | 27,8191  | 69,6894  | 1,32486       | -2,51521      | 0,0118961  | 0,0597737  | no  |
| AN3782 | ChrII_A_nidulans_FGSC_A4:3070621-3072316 | WT_5hasex | WT_veg | OK     | 8,78635  | 10,1305  | 0,205367      | -0,329844     | 0,741518   | 0,891371   | no  |
| AN3783 | ChrII_A_nidulans_FGSC_A4:3069494-3069982 | WT_5hasex | WT_veg | OK     | 1,2113   | 4,27434  | 1,81915       | -1,43567      | 0,151096   | 0,380789   | no  |
| AN3784 | ChrII_A_nidulans_FGSC_A4:3066307-3067515 | WT_5hasex | WT_veg | OK     | 13,1945  | 32,0208  | 1,27908       | -2,14702      | 0,0317917  | 0,126791   | no  |
| AN3785 | ChrII_A_nidulans_FGSC_A4:3063587-3065926 | WT_5hasex | WT_veg | OK     | 20,3883  | 20,6832  | 0,020719      | -0,0409605    | 0,967327   | 0,98803    | no  |
| AN3787 | ChrII_A_nidulans_FGSC_A4:3057981-3059562 | WT_5hasex | WT_veg | OK     | 41,4294  | 79,7514  | 0,944855      | -1,93449      | 0,0530527  | 0,185017   | no  |
| AN3788 | ChrII_A_nidulans_FGSC_A4:3055362-3055964 | WT_5hasex | WT_veg | OK     | 6,37971  | 17,7042  | 1,47253       | -1,93719      | 0,052722   | 0,184124   | no  |
| AN3789 | ChrII_A_nidulans_FGSC_A4:3053412-3054618 | WT_5hasex | WT_veg | OK     | 62,5917  | 76,8154  | 0,295424      | -0,576621     | 0,564195   | 0,79146    | no  |
| AN3791 | ChrII_A_nidulans_FGSC_A4:3048299-3049302 | WT_5hasex | WT_veg | OK     | 35,4914  | 85,9717  | 1,27639       | -2,19592      | 0,0280977  | 0,115272   | no  |
| AN3792 | ChrII_A_nidulans_FGSC_A4:3044646-3045882 | WT_5hasex | WT_veg | OK     | 7,34453  | 14,5559  | 0,986865      | -1,17779      | 0,238878   | 0,504589   | no  |
| AN3793 | ChrII_A_nidulans_FGSC_A4:3040893-3043842 | WT_5hasex | WT_veg | OK     | 49,0956  | 113,422  | 1,20803       | -2,47181      | 0,0134431  | 0,0657194  | no  |
| AN3794 | ChrII_A_nidulans_FGSC_A4:3037215-3040143 | WT_5hasex | WT_veg | OK     | 10,5503  | 56,3491  | 2,41711       | -4,63574      | 3,5566E-06 | 5,7152E-05 | yes |
| AN3795 | ChrII_A_nidulans_FGSC_A4:3026427-3027771 | WT_5hasex | WT_veg | OK     | 105,477  | 111,94   | 0,085796      | -0,168877     | 0,865893   | 0,948504   | no  |
| AN3796 | ChrII_A_nidulans_FGSC_A4:3023689-3024759 | WT_5hasex | WT_veg | OK     | 280,529  | 82,2669  | -1,76977      | 3,57474       | 0,00035058 | 0,00321255 | yes |
| AN3797 | ChrII_A_nidulans_FGSC_A4:3018438-3021733 | WT_5hasex | WT_veg | OK     | 10,8362  | 12,1156  | 0,161011      | -0,314046     | 0,753486   | 0,897592   | no  |
| AN3798 | ChrII_A_nidulans_FGSC_A4:3016974-3018093 | WT_5hasex | WT_veg | OK     | 24,1053  | 30,3037  | 0,330141      | -0,611928     | 0,540586   | 0,776061   | no  |
| AN3799 | ChrII_A_nidulans_FGSC_A4:3015316-3016501 | WT_5hasex | WT_veg | OK     | 44,2785  | 38,9948  | -0,183325     | 0,352962      | 0,724117   | 0,882589   | no  |
| AN3802 | ChrII_A_nidulans_FGSC_A4:3009101-3009853 | WT_5hasex | WT_veg | OK     | 71,56    | 100,542  | 0,490577      | -0,982786     | 0,325713   | 0,60233    | no  |
| AN3803 | ChrII_A_nidulans_FGSC_A4:2999178-3000968 | WT_5hasex | WT_veg | OK     | 104,878  | 99,768   | -0,0720608    | 0,145826      | 0,884059   | 0,955953   | no  |
| AN3804 | ChrII_A_nidulans_FGSC_A4:2996898-2998229 | WT_5hasex | WT_veg | OK     | 927,403  | 1533,81  | 0,72585       | -1,16397      | 0,244437   | 0,511929   | no  |
| AN3805 | ChrII_A_nidulans_FGSC_A4:2993728-2994707 | WT_5hasex | WT_veg | OK     | 31,0909  | 36,2292  | 0,220662      | -0,400628     | 0,688694   | 0,863062   | no  |
| AN3807 | ChrII_A_nidulans_FGSC_A4:2989380-2991397 | WT_5hasex | WT_veg | OK     | 72,3118  | 244,042  | 1,75483       | -3,58834      | 0,00033279 | 0,00307398 | yes |
| AN3808 | ChrII_A_nidulans_FGSC_A4:2987827-2988799 | WT_5hasex | WT_veg | OK     | 10,8957  | 15,7398  | 0,530655      | -0,795152     | 0,426525   | 0,693628   | no  |
| AN3809 | ChrII_A_nidulans_FGSC_A4:2986544-2987506 | WT_5hasex | WT_veg | OK     | 43,0645  | 85,1052  | 0,982749      | -1,86012      | 0,0628686  | 0,208771   | no  |
| AN3810 | ChrII_A_nidulans_FGSC_A4:2985109-2986044 | WT_5hasex | WT_veg | OK     | 112,879  | 127,868  | 0,179875      | -0,371084     | 0,710575   | 0,875471   | no  |
| AN3811 | ChrII_A_nidulans_FGSC_A4:2981782-2985050 | WT_5hasex | WT_veg | OK     | 11,8279  | 18,0804  | 0,61223       | -1,19891      | 0,230562   | 0,494431   | no  |
| AN3812 | ChrII_A_nidulans_FGSC_A4:2980523-2981596 | WT_5hasex | WT_veg | OK     | 32,3283  | 92,5881  | 1,51803       | -2,91173      | 0,00359437 | 0,0227426  | yes |
| AN3813 | ChrII_A_nidulans_FGSC_A4:2978647-2979788 | WT_5hasex | WT_veg | OK     | 49,875   | 34,6083  | -0,527199     | 0,957708      | 0,33821    | 0,614183   | no  |
| AN3816 | ChrII_A_nidulans_FGSC_A4:2972001-2972196 | WT_5hasex | WT_veg | NOTEST | 0        | 0        | 0             | 0             | 1          | 1          | no  |
| AN3817 | ChrII_A_nidulans_FGSC_A4:2967987-2971938 | WT_5hasex | WT_veg | OK     | 38,1864  | 45,6306  | 0,256941      | -0,505634     | 0,613114   | 0,820814   | no  |
| AN3818 | ChrII_A_nidulans_FGSC_A4:2963136-2964183 | WT_5hasex | WT_veg | OK     | 10,4779  | 18,3387  | 0,807543      | -1,1505       | 0,249937   | 0,518331   | no  |
| AN3819 | ChrII_A_nidulans_FGSC_A4:2960161-2961436 | WT_5hasex | WT_veg | OK     | 24,0566  | 36,4691  | 0,600243      | -1,12642      | 0,259989   | 0,530425   | no  |
| AN3820 | ChrII_A_nidulans_FGSC_A4:2958564-2959753 | WT_5hasex | WT_veg | OK     | 11,6685  | 41,4389  | 1,82836       | -2,82109      | 0,00478611 | 0,0287353  | yes |
| AN3821 | ChrII_A_nidulans_FGSC_A4:2955750-2957995 | WT_5hasex | WT_veg | OK     | 71,9175  | 116,54   | 0,696411      | -1,44745      | 0,14777    | 0,375375   | no  |
| AN3822 | ChrII_A_nidulans_FGSC_A4:2943065-2944418 | WT_5hasex | WT_veg | OK     | 14,5615  | 26,1053  | 0,842184      | -1,43107      | 0,15241    | 0,383159   | no  |
| AN3823 | ChrII_A_nidulans_FGSC_A4:2942066-2942913 | WT_5hasex | WT_veg | OK     | 1631,96  | 2930,67  | 0,844625      | -1,43671      | 0,150799   | 0,380267   | no  |
| AN3824 | ChrII_A_nidulans_FGSC_A4:2939941-2941629 | WT_5hasex | WT_veg | OK     | 73,0799  | 118,229  | 0,69404       | -1,43992      | 0,14989    | 0,378719   | no  |
| AN3825 | ChrII_A_nidulans_FGSC_A4:2936377-2936983 | WT_5hasex | WT_veg | OK     | 5,59768  | 20,7812  | 1,89238       | -2,55881      | 0,0105032  | 0,0541508  | no  |
| AN3826 | ChrII_A_nidulans_FGSC_A4:2934838-2936335 | WT_5hasex | WT_veg | OK     | 27,1391  | 39,3587  | 0,536312      | -1,01936      | 0,308031   | 0,584093   | no  |
| AN3827 | ChrII_A_nidulans_FGSC_A4:2932289-2934601 | WT_5hasex | WT_veg | OK     | 29,5009  | 181,506  | 2,62118       | -5,0171       | 5,2457E-07 | 1,0295E-05 | yes |
| AN3828 | ChrII_A_nidulans_FGSC_A4:2929411-2931262 | WT_5hasex | WT_veg | OK     | 5,0195   | 13,8496  | 1,46423       | -2,31214      | 0,02077    | 0,0917696  | no  |
| AN3829 | ChrII_A_nidulans_FGSC_A4:2927061-2929034 | WT_5hasex | WT_veg | OK     | 115,243  | 509,436  | 2,14422       | -4,27568      | 1,9056E-05 | 0,00025545 | yes |
| AN3831 | ChrII_A_nidulans_FGSC_A4:2921815-2922481 | WT_5hasex | WT_veg | OK     | 172,23   | 257,598  | 0,580786      | -1,14509      | 0,252171   | 0,521006   | no  |

## Supplementary table 1

|        |                                          |           |        |        |          |          |               |               |            |            |     |
|--------|------------------------------------------|-----------|--------|--------|----------|----------|---------------|---------------|------------|------------|-----|
| AN3832 | ChrII_A_nidulans_FGSC_A4:2917946-2920530 | WT_5hasex | WT_veg | OK     | 60,6093  | 78,0389  | 0,364655      | -0,726512     | 0,467525   | 0,72614    | no  |
| AN3833 | ChrII_A_nidulans_FGSC_A4:2916077-2917738 | WT_5hasex | WT_veg | OK     | 24,5092  | 35,5853  | 0,537956      | -0,98169      | 0,326252   | 0,602639   | no  |
| AN3834 | ChrII_A_nidulans_FGSC_A4:2913019-2915653 | WT_5hasex | WT_veg | OK     | 14,6467  | 18,1137  | 0,306507      | -0,601322     | 0,547626   | 0,780807   | no  |
| AN3835 | ChrII_A_nidulans_FGSC_A4:2908101-2910138 | WT_5hasex | WT_veg | OK     | 3,3404   | 5,61559  | 0,749415      | -1,07366      | 0,282974   | 0,556746   | no  |
| AN3836 | ChrII_A_nidulans_FGSC_A4:2906283-2907927 | WT_5hasex | WT_veg | OK     | 5,74807  | 10,5196  | 0,871925      | -1,31677      | 0,187916   | 0,437724   | no  |
| AN3837 | ChrII_A_nidulans_FGSC_A4:2903840-2905896 | WT_5hasex | WT_veg | OK     | 5,59313  | 13,7828  | 1,30114       | -2,03522      | 0,0418283  | 0,155829   | no  |
| AN3838 | ChrII_A_nidulans_FGSC_A4:2901459-2903426 | WT_5hasex | WT_veg | OK     | 18,1801  | 24,5033  | 0,43062       | -0,825732     | 0,408956   | 0,678899   | no  |
| AN3840 | ChrII_A_nidulans_FGSC_A4:2896886-2898625 | WT_5hasex | WT_veg | OK     | 22,5232  | 35,486   | 0,655837      | -1,27536      | 0,202181   | 0,457723   | no  |
| AN3841 | ChrII_A_nidulans_FGSC_A4:2894179-2896645 | WT_5hasex | WT_veg | OK     | 67,3188  | 111,613  | 0,729427      | -1,51231      | 0,130455   | 0,346091   | no  |
| AN3843 | ChrII_A_nidulans_FGSC_A4:2889612-2891790 | WT_5hasex | WT_veg | OK     | 151,433  | 458,902  | 1,59951       | -3,1548       | 0,00160609 | 0,0116358  | yes |
| AN3844 | ChrII_A_nidulans_FGSC_A4:2885016-2889176 | WT_5hasex | WT_veg | OK     | 20,5265  | 22,2349  | 0,11534       | -0,236716     | 0,812877   | 0,924931   | no  |
| AN3845 | ChrII_A_nidulans_FGSC_A4:2882697-2883301 | WT_5hasex | WT_veg | OK     | 21,1036  | 95,4719  | 2,17758       | -3,42484      | 0,00061517 | 0,00519772 | yes |
| AN3846 | ChrII_A_nidulans_FGSC_A4:2881061-2882501 | WT_5hasex | WT_veg | OK     | 213,969  | 965,791  | 2,17431       | -4,26901      | 1,9634E-05 | 0,00026207 | yes |
| AN3848 | ChrII_A_nidulans_FGSC_A4:2877598-2878047 | WT_5hasex | WT_veg | OK     | 251,932  | 2189,44  | 3,11945       | -6,34498      | 2,2245E-10 | 8,7515E-09 | yes |
| AN3849 | ChrII_A_nidulans_FGSC_A4:2876736-2877573 | WT_5hasex | WT_veg | OK     | 11,8007  | 37,3706  | 1,66304       | -2,5098       | 0,0120799  | 0,0604684  | no  |
| AN3850 | ChrII_A_nidulans_FGSC_A4:2874836-2876045 | WT_5hasex | WT_veg | OK     | 6,6886   | 4,75595  | -0,491972     | 0,659271      | 0,509722   | 0,756023   | no  |
| AN3851 | ChrII_A_nidulans_FGSC_A4:2873110-2874247 | WT_5hasex | WT_veg | OK     | 13,8434  | 37,3876  | 1,43336       | -2,43522      | 0,0148826  | 0,0711113  | no  |
| AN3852 | ChrII_A_nidulans_FGSC_A4:2871339-2872780 | WT_5hasex | WT_veg | OK     | 21,5745  | 35,1541  | 0,704365      | -1,31856      | 0,187315   | 0,436796   | no  |
| AN3853 | ChrII_A_nidulans_FGSC_A4:2867398-2870616 | WT_5hasex | WT_veg | OK     | 79,7367  | 83,8854  | 0,0731766     | -0,133407     | 0,893871   | 0,959453   | no  |
| AN3854 | ChrII_A_nidulans_FGSC_A4:2864955-2866606 | WT_5hasex | WT_veg | OK     | 39,0418  | 91,2844  | 1,22535       | -2,50083      | 0,0123902  | 0,0617002  | no  |
| AN3855 | ChrII_A_nidulans_FGSC_A4:2863566-2864607 | WT_5hasex | WT_veg | OK     | 8,32633  | 13,8405  | 0,733139      | -1,08508      | 0,277887   | 0,55123    | no  |
| AN3856 | ChrII_A_nidulans_FGSC_A4:2862048-2862946 | WT_5hasex | WT_veg | NOTEST | 0,930211 | 2,25314  | 1,27631       | -1,05653      | 0,290725   | 1          | no  |
| AN3858 | ChrII_A_nidulans_FGSC_A4:2857059-2857649 | WT_5hasex | WT_veg | OK     | 6,3227   | 3,33743  | -0,921803     | 0,941443      | 0,346478   | 0,621892   | no  |
| AN3860 | ChrII_A_nidulans_FGSC_A4:2854449-2855245 | WT_5hasex | WT_veg | OK     | 2,73275  | 9,8917   | 1,85586       | -2,30645      | 0,0210853  | 0,092842   | no  |
| AN3862 | ChrII_A_nidulans_FGSC_A4:2846617-2848265 | WT_5hasex | WT_veg | NOTEST | 0,49637  | 0,402584 | -0,302128     | 0,190586      | 0,84885    | 1          | no  |
| AN3863 | ChrII_A_nidulans_FGSC_A4:2842720-2845340 | WT_5hasex | WT_veg | OK     | 3,27674  | 7,09609  | 1,11476       | -1,6549       | 0,0979456  | 0,285046   | no  |
| AN3864 | ChrII_A_nidulans_FGSC_A4:2839728-2840370 | WT_5hasex | WT_veg | OK     | 9,88673  | 19,5475  | 0,983423      | -1,4003       | 0,161422   | 0,397166   | no  |
| AN3865 | ChrII_A_nidulans_FGSC_A4:2837503-2839595 | WT_5hasex | WT_veg | OK     | 34,4435  | 38,8536  | 0,173816      | -0,351441     | 0,725258   | 0,883207   | no  |
| AN3866 | ChrII_A_nidulans_FGSC_A4:2835488-2836823 | WT_5hasex | WT_veg | OK     | 13,6284  | 34,9175  | 1,35734       | -2,36549      | 0,018006   | 0,0821838  | no  |
| AN3867 | ChrII_A_nidulans_FGSC_A4:2834226-2835358 | WT_5hasex | WT_veg | OK     | 21,5883  | 33,8015  | 0,646842      | -1,14623      | 0,251699   | 0,52039    | no  |
| AN3868 | ChrII_A_nidulans_FGSC_A4:2831322-2833593 | WT_5hasex | WT_veg | OK     | 7,51956  | 10,0853  | 0,423534      | -0,665346     | 0,505829   | 0,753748   | no  |
| AN3869 | ChrII_A_nidulans_FGSC_A4:2829288-2830833 | WT_5hasex | WT_veg | OK     | 23,9961  | 41,2058  | 0,780046      | -1,52773      | 0,126579   | 0,339094   | no  |
| AN3870 | ChrII_A_nidulans_FGSC_A4:2825803-2827169 | WT_5hasex | WT_veg | OK     | 0,995685 | 4,35839  | 2,13003       | -2,12588      | 0,0335129  | 0,132206   | no  |
| AN3871 | ChrII_A_nidulans_FGSC_A4:2821610-2823368 | WT_5hasex | WT_veg | OK     | 6,07141  | 5,04656  | -0,266732     | 0,377923      | 0,705488   | 0,872549   | no  |
| AN3872 | ChrII_A_nidulans_FGSC_A4:2820683-2821543 | WT_5hasex | WT_veg | OK     | 203,958  | 1014,7   | 2,31471       | -4,2842       | 1,834E-05  | 0,00024801 | yes |
| AN3873 | ChrII_A_nidulans_FGSC_A4:2818790-2820303 | WT_5hasex | WT_veg | OK     | 52,3583  | 123,96   | 1,24339       | -2,16345      | 0,0305069  | 0,122914   | no  |
| AN3875 | ChrII_A_nidulans_FGSC_A4:2813886-2815323 | WT_5hasex | WT_veg | OK     | 34,4453  | 71,8906  | 1,06149       | -2,13088      | 0,0330993  | 0,130874   | no  |
| AN3876 | ChrII_A_nidulans_FGSC_A4:2811202-2812914 | WT_5hasex | WT_veg | OK     | 11,2021  | 50,1375  | 2,16212       | -3,56336      | 0,00036614 | 0,00333102 | yes |
| AN3877 | ChrII_A_nidulans_FGSC_A4:2807436-2808353 | WT_5hasex | WT_veg | OK     | 1,94164  | 3,62509  | 0,900739      | -0,868197     | 0,385287   | 0,659189   | no  |
| AN3879 | ChrII_A_nidulans_FGSC_A4:2797061-2798710 | WT_5hasex | WT_veg | OK     | 9,52541  | 12,1194  | 0,347461      | -0,571153     | 0,567896   | 0,793931   | no  |
| AN3880 | ChrII_A_nidulans_FGSC_A4:2795381-2796876 | WT_5hasex | WT_veg | NOTEST | 0,221647 | 1,18442  | 2,41784       | -1,56293      | 0,118069   | 1          | no  |
| AN3881 | ChrII_A_nidulans_FGSC_A4:2790376-2793889 | WT_5hasex | WT_veg | OK     | 2,17376  | 3,073    | 0,499456      | -0,700856     | 0,483393   | 0,737753   | no  |
| AN3882 | ChrII_A_nidulans_FGSC_A4:2788419-2790348 | WT_5hasex | WT_veg | OK     | 7,08528  | 7,28618  | 0,0403374     | -0,0666445    | 0,946865   | 0,980192   | no  |
| AN3883 | ChrII_A_nidulans_FGSC_A4:2782849-2784305 | WT_5hasex | WT_veg | OK     | 0,921321 | 4,51084  | 2,29162       | -2,49701      | 0,0125245  | 0,0622269  | no  |
| AN3884 | ChrII_A_nidulans_FGSC_A4:2780256-2782190 | WT_5hasex | WT_veg | NOTEST | 0        | 0        | 0             | 0             | 1          | 1          | no  |
| AN3885 | ChrII_A_nidulans_FGSC_A4:2777309-2778587 | WT_5hasex | WT_veg | NOTEST | 0        | 0        | 0             | 0             | 1          | 1          | no  |
| AN3886 | ChrII_A_nidulans_FGSC_A4:2775783-2777057 | WT_5hasex | WT_veg | NOTEST | 0        | 0        | 0             | 0             | 1          | 1          | no  |
| AN3887 | ChrII_A_nidulans_FGSC_A4:2772680-2774653 | WT_5hasex | WT_veg | NOTEST | 0,223304 | 0,343495 | 0,621284      | -0,344941     | 0,730139   | 1          | no  |
| AN3888 | ChrII_A_nidulans_FGSC_A4:2770409-2772371 | WT_5hasex | WT_veg | OK     | 6,50941  | 6,33372  | -0,0394736    | 0,0604587     | 0,95179    | 0,982136   | no  |
| AN3889 | ChrII_A_nidulans_FGSC_A4:2769149-2770016 | WT_5hasex | WT_veg | OK     | 12,9641  | 40,2538  | 1,6346        | -2,5606       | 0,0104493  | 0,0539417  | no  |
| AN3890 | ChrII_A_nidulans_FGSC_A4:2765520-2768551 | WT_5hasex | WT_veg | OK     | 13,4081  | 23,7511  | 0,824884      | -1,63288      | 0,102495   | 0,294741   | no  |
| AN3891 | ChrII_A_nidulans_FGSC_A4:2762274-2763832 | WT_5hasex | WT_veg | NOTEST | 0,289204 | 0        | -1.79769e+308 | -1.79769e+308 | 0,224063   | 1          | no  |
| AN3892 | ChrII_A_nidulans_FGSC_A4:2758180-2759490 | WT_5hasex | WT_veg | NOTEST | 0        | 0        | 0             | 0             | 1          | 1          | no  |

## Supplementary table 1

|        |                                          |           |        |        |          |          |              |              |            |                |
|--------|------------------------------------------|-----------|--------|--------|----------|----------|--------------|--------------|------------|----------------|
| AN3893 | ChrII_A_nidulans_FGSC_A4:2752645-2754620 | WT_5hasex | WT_veg | NOTEST | 0        | 0        | 0            | 0            | 1          | 1 no           |
| AN3894 | ChrII_A_nidulans_FGSC_A4:2749795-2752220 | WT_5hasex | WT_veg | OK     | 16,9948  | 22,3513  | 0,395266     | -0,749858    | 0,45334    | 0,714659 no    |
| AN3895 | ChrII_A_nidulans_FGSC_A4:2747115-2748975 | WT_5hasex | WT_veg | OK     | 7,82968  | 26,1356  | 1,73899      | -2,68361     | 0,00728328 | 0,0404257 yes  |
| AN3896 | ChrII_A_nidulans_FGSC_A4:2744986-2745946 | WT_5hasex | WT_veg | OK     | 2,0349   | 2,85948  | 0,490792     | -0,359652    | 0,719107   | 0,879622 no    |
| AN3897 | ChrII_A_nidulans_FGSC_A4:2742678-2744853 | WT_5hasex | WT_veg | OK     | 43,8786  | 64,7412  | 0,561167     | -1,14163     | 0,253609   | 0,522925 no    |
| AN3898 | ChrII_A_nidulans_FGSC_A4:2740801-2742190 | WT_5hasex | WT_veg | OK     | 10,1463  | 12,2173  | 0,267978     | -0,433589    | 0,664587   | 0,849948 no    |
| AN3900 | ChrII_A_nidulans_FGSC_A4:2733967-2736316 | WT_5hasex | WT_veg | OK     | 6,43629  | 30,1681  | 2,22872      | -3,64582     | 0,00026654 | 0,00255155 yes |
| AN3901 | ChrII_A_nidulans_FGSC_A4:2731762-2733489 | WT_5hasex | WT_veg | OK     | 47,2813  | 75,0644  | 0,66686      | -1,21328     | 0,225023   | 0,487258 no    |
| AN3902 | ChrII_A_nidulans_FGSC_A4:2729340-2731348 | WT_5hasex | WT_veg | OK     | 3,04574  | 9,66928  | 1,66662      | -2,43158     | 0,0150332  | 0,0716546 no   |
| AN3905 | ChrII_A_nidulans_FGSC_A4:2715015-2716514 | WT_5hasex | WT_veg | OK     | 37,9428  | 48,3282  | 0,349042     | -0,677696    | 0,497965   | 0,748295 no    |
| AN3906 | ChrII_A_nidulans_FGSC_A4:2707301-2711053 | WT_5hasex | WT_veg | OK     | 66,1348  | 87,8046  | 0,408886     | -0,80303     | 0,421958   | 0,689957 no    |
| AN3907 | ChrII_A_nidulans_FGSC_A4:2697977-2701463 | WT_5hasex | WT_veg | OK     | 26,5413  | 28,0661  | 0,0805898    | -0,166662    | 0,867636   | 0,949299 no    |
| AN3909 | ChrII_A_nidulans_FGSC_A4:2687978-2691520 | WT_5hasex | WT_veg | OK     | 7,89481  | 15,6483  | 0,987034     | -1,86355     | 0,062385   | 0,207694 no    |
| AN3910 | ChrII_A_nidulans_FGSC_A4:2684802-2687034 | WT_5hasex | WT_veg | OK     | 42,9611  | 70,0591  | 0,70554      | -1,44701     | 0,147895   | 0,375503 no    |
| AN3911 | ChrII_A_nidulans_FGSC_A4:2680265-2681996 | WT_5hasex | WT_veg | OK     | 83,6351  | 132,396  | 0,662684     | -1,3754      | 0,169007   | 0,409238 no    |
| AN3915 | ChrII_A_nidulans_FGSC_A4:2659421-2660568 | WT_5hasex | WT_veg | NOTEST | 0,318967 | 0,811499 | 1,34718      | -0,741852    | 0,458177   | 1 no           |
| AN3916 | ChrII_A_nidulans_FGSC_A4:2655310-2657364 | WT_5hasex | WT_veg | OK     | 3,86693  | 29,417   | 2,92739      | -4,38045     | 1,1843E-05 | 0,00016671 yes |
| AN3918 | ChrII_A_nidulans_FGSC_A4:2649466-2651409 | WT_5hasex | WT_veg | OK     | 154,899  | 205,097  | 0,404982     | -0,810919    | 0,417412   | 0,686284 no    |
| AN3919 | ChrII_A_nidulans_FGSC_A4:2647132-2648883 | WT_5hasex | WT_veg | OK     | 57,6963  | 168,433  | 1,54562      | -3,20372     | 0,00135665 | 0,0101055 yes  |
| AN3920 | ChrII_A_nidulans_FGSC_A4:2644574-2646657 | WT_5hasex | WT_veg | OK     | 73,073   | 104,629  | 0,517866     | -1,07452     | 0,28259    | 0,556451 no    |
| AN3921 | ChrII_A_nidulans_FGSC_A4:2643476-2644151 | WT_5hasex | WT_veg | OK     | 22,4433  | 30,0335  | 0,420284     | -0,711896    | 0,476529   | 0,732545 no    |
| AN3922 | ChrII_A_nidulans_FGSC_A4:2642344-2643054 | WT_5hasex | WT_veg | OK     | 565,973  | 993,623  | 0,811964     | -1,56121     | 0,118474   | 0,324886 no    |
| AN3923 | ChrII_A_nidulans_FGSC_A4:2634860-2641743 | WT_5hasex | WT_veg | OK     | 12,6599  | 32,4033  | 1,35587      | -2,78645     | 0,00532892 | 0,0312986 yes  |
| AN3924 | ChrII_A_nidulans_FGSC_A4:2632635-2634483 | WT_5hasex | WT_veg | OK     | 16,4582  | 62,3944  | 1,92261      | -3,70443     | 0,00021186 | 0,00209311 yes |
| AN3925 | ChrII_A_nidulans_FGSC_A4:2629321-2630624 | WT_5hasex | WT_veg | OK     | 585,399  | 1301,13  | 1,15228      | -1,98324     | 0,0473404  | 0,170979 no    |
| AN3926 | ChrII_A_nidulans_FGSC_A4:2627210-2628871 | WT_5hasex | WT_veg | OK     | 20,7786  | 30,1413  | 0,536642     | -1,02743     | 0,304218   | 0,580202 no    |
| AN3927 | ChrII_A_nidulans_FGSC_A4:2625658-2627014 | WT_5hasex | WT_veg | OK     | 31,2369  | 38,0542  | 0,284806     | -0,56263     | 0,573687   | 0,797234 no    |
| AN3930 | ChrII_A_nidulans_FGSC_A4:2616527-2618584 | WT_5hasex | WT_veg | OK     | 13,1516  | 21,1092  | 0,682628     | -1,28455     | 0,198948   | 0,452939 no    |
| AN3932 | ChrII_A_nidulans_FGSC_A4:2611983-2613325 | WT_5hasex | WT_veg | OK     | 304,62   | 364,054  | 0,257139     | -0,509209    | 0,610605   | 0,819396 no    |
| AN3933 | ChrII_A_nidulans_FGSC_A4:2607820-2611753 | WT_5hasex | WT_veg | OK     | 26,9658  | 68,7528  | 1,35029      | -2,837       | 0,00455391 | 0,0275973 yes  |
| AN3934 | ChrII_A_nidulans_FGSC_A4:2605243-2606503 | WT_5hasex | WT_veg | OK     | 49,4634  | 103,681  | 1,06772      | -2,08659     | 0,0369256  | 0,142167 no    |
| AN3935 | ChrII_A_nidulans_FGSC_A4:2603343-2604379 | WT_5hasex | WT_veg | OK     | 116,061  | 482,408  | 2,05536      | -4,27982     | 1,8705E-05 | 0,00025177 yes |
| AN3936 | ChrII_A_nidulans_FGSC_A4:2600778-2601992 | WT_5hasex | WT_veg | OK     | 15,1519  | 32,4344  | 1,09803      | -1,84818     | 0,0645756  | 0,21293 no     |
| AN3937 | ChrII_A_nidulans_FGSC_A4:2598574-2600313 | WT_5hasex | WT_veg | OK     | 8,39734  | 15,5295  | 0,887008     | -1,49785     | 0,134172   | 0,352904 no    |
| AN3938 | ChrII_A_nidulans_FGSC_A4:2590236-2598156 | WT_5hasex | WT_veg | OK     | 4,60298  | 19,9339  | 2,11458      | -4,15862     | 3,2017E-05 | 0,00040624 yes |
| AN3939 | ChrII_A_nidulans_FGSC_A4:2586209-2589122 | WT_5hasex | WT_veg | OK     | 18,5849  | 17,6765  | -0,0723017   | 0,145372     | 0,884417   | 0,955955 no    |
| AN3940 | ChrII_A_nidulans_FGSC_A4:2584938-2585816 | WT_5hasex | WT_veg | OK     | 7,29323  | 16,1989  | 1,15126      | -1,65996     | 0,0969234  | 0,282926 no    |
| AN3942 | ChrII_A_nidulans_FGSC_A4:2574933-2576037 | WT_5hasex | WT_veg | OK     | 20,9677  | 21,9841  | 0,0682887    | -0,122447    | 0,902545   | 0,962477 no    |
| AN3943 | ChrII_A_nidulans_FGSC_A4:2573472-2574523 | WT_5hasex | WT_veg | OK     | 64,5217  | 76,0103  | 0,236411     | -0,478357    | 0,632396   | 0,831829 no    |
| AN3944 | ChrII_A_nidulans_FGSC_A4:2567154-2570379 | WT_5hasex | WT_veg | OK     | 12,3747  | 45,6151  | 1,88212      | -3,72274     | 0,00019707 | 0,00196742 yes |
| AN3945 | ChrII_A_nidulans_FGSC_A4:2559919-2561896 | WT_5hasex | WT_veg | OK     | 27,9438  | 45,7845  | 0,71233      | -1,39128     | 0,164142   | 0,401537 no    |
| AN3947 | ChrII_A_nidulans_FGSC_A4:2551432-2553470 | WT_5hasex | WT_veg | OK     | 11,3831  | 26,2648  | 1,20624      | -2,17961     | 0,0292864  | 0,119077 no    |
| AN3948 | ChrII_A_nidulans_FGSC_A4:2546963-2548980 | WT_5hasex | WT_veg | OK     | 44,6002  | 78,6885  | 0,819104     | -1,70856     | 0,0875323  | 0,264053 no    |
| AN3951 | ChrII_A_nidulans_FGSC_A4:2534810-2537297 | WT_5hasex | WT_veg | NOTEST | 0        | 0,389064 | 1.79769e+308 | 1.79769e+308 | 0,123323   | 1 no           |
| AN3952 | ChrII_A_nidulans_FGSC_A4:2529141-2534482 | WT_5hasex | WT_veg | OK     | 4,84312  | 1,89179  | -1,35618     | 2,29334      | 0,0218286  | 0,0952425 no   |
| AN3953 | ChrII_A_nidulans_FGSC_A4:2525834-2526896 | WT_5hasex | WT_veg | OK     | 19,6021  | 60,5655  | 1,62749      | -2,91247     | 0,00358585 | 0,0226967 yes  |
| AN3954 | ChrII_A_nidulans_FGSC_A4:2522283-2524565 | WT_5hasex | WT_veg | OK     | 580,997  | 1448,75  | 1,3182       | -2,30105     | 0,0213889  | 0,0937998 no   |
| AN3955 | ChrII_A_nidulans_FGSC_A4:2520365-2522109 | WT_5hasex | WT_veg | OK     | 127,722  | 83,6999  | -0,609704    | 1,23928      | 0,21524    | 0,475026 no    |
| AN3956 | ChrII_A_nidulans_FGSC_A4:2518057-2519937 | WT_5hasex | WT_veg | OK     | 15,4869  | 34,3984  | 1,15129      | -2,16678     | 0,0302517  | 0,122074 no    |
| AN3958 | ChrII_A_nidulans_FGSC_A4:2513902-2515093 | WT_5hasex | WT_veg | OK     | 6,48118  | 12,888   | 0,991699     | -1,48633     | 0,137191   | 0,357879 no    |
| AN3959 | ChrII_A_nidulans_FGSC_A4:2510080-2511837 | WT_5hasex | WT_veg | OK     | 4,7835   | 9,44899  | 0,982093     | -1,4373      | 0,150634   | 0,37999 no     |
| AN3960 | ChrII_A_nidulans_FGSC_A4:2507574-2509298 | WT_5hasex | WT_veg | OK     | 0,667279 | 4,10783  | 2,62201      | -2,86686     | 0,0041457  | 0,025537 yes   |
| AN3961 | ChrII_A_nidulans_FGSC_A4:2503751-2505868 | WT_5hasex | WT_veg | OK     | 288,705  | 195,676  | -0,561128    | 1,01468      | 0,310259   | 0,586673 no    |

## Supplementary table 1

|        |                                          |           |        |        |          |          |               |               |            |            |     |
|--------|------------------------------------------|-----------|--------|--------|----------|----------|---------------|---------------|------------|------------|-----|
| AN3963 | ChrII_A_nidulans_FGSC_A4:2491032-2492105 | WT_5hasex | WT_veg | OK     | 6,9646   | 12,0789  | 0,794372      | -1,07856      | 0,280784   | 0,554401   | no  |
| AN3964 | ChrII_A_nidulans_FGSC_A4:2488781-2489726 | WT_5hasex | WT_veg | NOTEST | 0        | 0        | 0             | 0             | 1          | 1          | no  |
| AN3965 | ChrII_A_nidulans_FGSC_A4:2487453-2488571 | WT_5hasex | WT_veg | NOTEST | 0        | 0        | 0             | 0             | 1          | 1          | no  |
| AN3966 | ChrII_A_nidulans_FGSC_A4:2484983-2486140 | WT_5hasex | WT_veg | NOTEST | 0,309086 | 0        | -1.79769e+308 | -1.79769e+308 | 0,224063   | 1          | no  |
| AN3967 | ChrII_A_nidulans_FGSC_A4:2482739-2484034 | WT_5hasex | WT_veg | NOTEST | 1,06612  | 3,31337  | 1,63592       | -1,4066       | 0,159545   | 1          | no  |
| AN3968 | ChrII_A_nidulans_FGSC_A4:2479001-2479592 | WT_5hasex | WT_veg | NOTEST | 0,664323 | 0,281186 | -1,24036      | 0,392398      | 0,694764   | 1          | no  |
| AN3969 | ChrII_A_nidulans_FGSC_A4:2474435-2475545 | WT_5hasex | WT_veg | OK     | 9,78462  | 17,5071  | 0,839351      | -1,30481      | 0,191957   | 0,44322    | no  |
| AN3970 | ChrII_A_nidulans_FGSC_A4:2472681-2474167 | WT_5hasex | WT_veg | OK     | 18,1794  | 20,2397  | 0,154889      | -0,28175      | 0,778136   | 0,909238   | no  |
| AN3972 | ChrII_A_nidulans_FGSC_A4:2464002-2467873 | WT_5hasex | WT_veg | OK     | 18,1472  | 32,1538  | 0,825239      | -1,68013      | 0,0929323  | 0,275132   | no  |
| AN3973 | ChrII_A_nidulans_FGSC_A4:2462856-2463780 | WT_5hasex | WT_veg | OK     | 119,923  | 370,012  | 1,62547       | -3,39348      | 0,0006901  | 0,00572376 | yes |
| AN3974 | ChrII_A_nidulans_FGSC_A4:2460993-2462012 | WT_5hasex | WT_veg | OK     | 11,2705  | 13,3546  | 0,244792      | -0,363484     | 0,716243   | 0,878304   | no  |
| AN3975 | ChrII_A_nidulans_FGSC_A4:2457064-2457967 | WT_5hasex | WT_veg | OK     | 2,98688  | 1,61535  | -0,886792     | 0,801597      | 0,422786   | 0,690741   | no  |
| AN3976 | ChrII_A_nidulans_FGSC_A4:2452402-2453462 | WT_5hasex | WT_veg | OK     | 145,15   | 194,154  | 0,41966       | -0,779809     | 0,435503   | 0,700889   | no  |
| AN3977 | ChrII_A_nidulans_FGSC_A4:2450051-2451461 | WT_5hasex | WT_veg | NOTEST | 0        | 0        | 0             | 0             | 1          | 1          | no  |
| AN3979 | ChrII_A_nidulans_FGSC_A4:2441499-2442166 | WT_5hasex | WT_veg | OK     | 80,8038  | 190,069  | 1,23403       | -2,48629      | 0,0129081  | 0,0637404  | no  |
| AN3980 | ChrII_A_nidulans_FGSC_A4:2438587-2439646 | WT_5hasex | WT_veg | NOTEST | 0,556746 | 2,0413   | 1,8744        | -1,47039      | 0,141456   | 1          | no  |
| AN3982 | ChrII_A_nidulans_FGSC_A4:2432322-2433752 | WT_5hasex | WT_veg | OK     | 4,0835   | 3,75081  | -0,122603     | 0,157397      | 0,874932   | 0,952095   | no  |
| AN3983 | ChrII_A_nidulans_FGSC_A4:2429832-2430844 | WT_5hasex | WT_veg | OK     | 4,56494  | 16,0692  | 1,81563       | -2,04923      | 0,0404395  | 0,152038   | no  |
| AN3984 | ChrII_A_nidulans_FGSC_A4:2426465-2427459 | WT_5hasex | WT_veg | NOTEST | 0        | 0        | 0             | 0             | 1          | 1          | no  |
| AN3985 | ChrII_A_nidulans_FGSC_A4:2424450-2426057 | WT_5hasex | WT_veg | NOTEST | 0        | 0        | 0             | 0             | 1          | 1          | no  |
| AN3986 | ChrII_A_nidulans_FGSC_A4:2421837-2424116 | WT_5hasex | WT_veg | NOTEST | 0,345506 | 1,18311  | 1,7758        | -1,60254      | 0,109036   | 1          | no  |
| AN3987 | ChrII_A_nidulans_FGSC_A4:2419684-2421427 | WT_5hasex | WT_veg | OK     | 28,3017  | 39,8885  | 0,495083      | -0,961003     | 0,336551   | 0,612699   | no  |
| AN3988 | ChrII_A_nidulans_FGSC_A4:2411692-2416203 | WT_5hasex | WT_veg | NOTEST | 0,518794 | 1,26776  | 1,28905       | -1,44494      | 0,148476   | 1          | no  |
| AN3989 | ChrII_A_nidulans_FGSC_A4:2409073-2409697 | WT_5hasex | WT_veg | NOTEST | 0,388354 | 0        | -1.79769e+308 | -1.79769e+308 | 0,224063   | 1          | no  |
| AN3990 | ChrII_A_nidulans_FGSC_A4:2405568-2407143 | WT_5hasex | WT_veg | NOTEST | 0,110341 | 0        | -1.79769e+308 | -1.79769e+308 | 0,165569   | 1          | no  |
| AN3991 | ChrII_A_nidulans_FGSC_A4:2403562-2405122 | WT_5hasex | WT_veg | NOTEST | 0,154646 | 0        | -1.79769e+308 | -1.79769e+308 | 0,224063   | 1          | no  |
| AN3992 | ChrII_A_nidulans_FGSC_A4:2401152-2403475 | WT_5hasex | WT_veg | NOTEST | 0,69021  | 1,02536  | 0,571024      | -0,566996     | 0,570717   | 1          | no  |
| AN3993 | ChrII_A_nidulans_FGSC_A4:2398538-2399626 | WT_5hasex | WT_veg | NOTEST | 0        | 0        | 0             | 0             | 1          | 1          | no  |
| AN3994 | ChrII_A_nidulans_FGSC_A4:2397172-2398378 | WT_5hasex | WT_veg | OK     | 1,89319  | 2,78979  | 0,559335      | -0,591647     | 0,554087   | 0,784588   | no  |
| AN3995 | ChrII_A_nidulans_FGSC_A4:2395336-2396737 | WT_5hasex | WT_veg | NOTEST | 0,885045 | 2,3112   | 1,38482       | -1,31989      | 0,186872   | 1          | no  |
| AN3996 | ChrII_A_nidulans_FGSC_A4:2391335-2392264 | WT_5hasex | WT_veg | OK     | 125,523  | 74,8992  | -0,744924     | 1,16604       | 0,243599   | 0,510897   | no  |
| AN3997 | ChrII_A_nidulans_FGSC_A4:2388128-2389487 | WT_5hasex | WT_veg | NOTEST | 0,707154 | 2,48851  | 1,81519       | -1,80655      | 0,0708325  | 1          | no  |
| AN3998 | ChrII_A_nidulans_FGSC_A4:2386171-2387245 | WT_5hasex | WT_veg | OK     | 63,7335  | 163,043  | 1,35513       | -2,56213      | 0,0104031  | 0,0537657  | no  |
| AN4001 | ChrII_A_nidulans_FGSC_A4:2374070-2376089 | WT_5hasex | WT_veg | OK     | 1,94702  | 6,12297  | 1,65296       | -2,27801      | 0,022726   | 0,0980639  | no  |
| AN4002 | ChrII_A_nidulans_FGSC_A4:2372643-2373752 | WT_5hasex | WT_veg | OK     | 6,59557  | 34,7752  | 2,39849       | -3,6324       | 0,00028079 | 0,00266705 | yes |
| AN4003 | ChrII_A_nidulans_FGSC_A4:2369971-2371083 | WT_5hasex | WT_veg | OK     | 10,895   | 202,944  | 4,21935       | -6,96783      | 3,2185E-12 | 1,6584E-10 | yes |
| AN4004 | ChrII_A_nidulans_FGSC_A4:2366001-2367285 | WT_5hasex | WT_veg | NOTEST | 0        | 0        | 0             | 0             | 1          | 1          | no  |
| AN4005 | ChrII_A_nidulans_FGSC_A4:2363409-2365150 | WT_5hasex | WT_veg | NOTEST | 0,231757 | 0        | -1.79769e+308 | -1.79769e+308 | 0,224063   | 1          | no  |
| AN4006 | ChrII_A_nidulans_FGSC_A4:2357614-2361099 | WT_5hasex | WT_veg | NOTEST | 0,209194 | 3,82121  | 4,19112       | -4,14849      | 3,3468E-05 | 1          | no  |
| AN4008 | ChrII_A_nidulans_FGSC_A4:2352786-2354155 | WT_5hasex | WT_veg | OK     | 218,162  | 1268,25  | 2,53937       | -3,75837      | 0,00017103 | 0,00174191 | yes |
| AN4009 | ChrII_A_nidulans_FGSC_A4:2351265-2352654 | WT_5hasex | WT_veg | OK     | 1,33714  | 7,89376  | 2,56157       | -2,96337      | 0,00304291 | 0,0197859  | yes |
| AN4010 | ChrII_A_nidulans_FGSC_A4:2348582-2350736 | WT_5hasex | WT_veg | NOTEST | 1,18147  | 2,23036  | 0,916695      | -1,11352      | 0,265484   | 1          | no  |
| AN4011 | ChrII_A_nidulans_FGSC_A4:2346871-2348350 | WT_5hasex | WT_veg | OK     | 1,78456  | 7,50307  | 2,07191       | -2,6571       | 0,00788167 | 0,0430673  | yes |
| AN4012 | ChrII_A_nidulans_FGSC_A4:2344558-2346298 | WT_5hasex | WT_veg | NOTEST | 0,262704 | 0,110926 | -1,24384      | 0,390523      | 0,696149   | 1          | no  |
| AN4013 | ChrII_A_nidulans_FGSC_A4:2340408-2343272 | WT_5hasex | WT_veg | OK     | 4,93779  | 9,00687  | 0,86716       | -1,42787      | 0,153329   | 0,38464    | no  |
| AN4015 | ChrII_A_nidulans_FGSC_A4:2334419-2335565 | WT_5hasex | WT_veg | OK     | 1540,85  | 3492,07  | 1,18036       | -1,96734      | 0,0491443  | 0,175464   | no  |
| AN4016 | ChrII_A_nidulans_FGSC_A4:2330673-2331838 | WT_5hasex | WT_veg | OK     | 2062,57  | 3166,08  | 0,61825       | -1,02028      | 0,307595   | 0,583658   | no  |
| AN4017 | ChrII_A_nidulans_FGSC_A4:2329410-2330598 | WT_5hasex | WT_veg | OK     | 92,4994  | 139,428  | 0,592005      | -1,18833      | 0,234702   | 0,499896   | no  |
| AN4018 | ChrII_A_nidulans_FGSC_A4:2326125-2328689 | WT_5hasex | WT_veg | OK     | 40,7956  | 73,2856  | 0,845117      | -1,71493      | 0,0863587  | 0,261744   | no  |
| AN4019 | ChrII_A_nidulans_FGSC_A4:2323534-2325493 | WT_5hasex | WT_veg | OK     | 25,7428  | 71,4597  | 1,47296       | -2,7629       | 0,00572907 | 0,0332574  | yes |
| AN4020 | ChrII_A_nidulans_FGSC_A4:2322428-2322894 | WT_5hasex | WT_veg | OK     | 130,412  | 227,714  | 0,804146      | -1,55655      | 0,119576   | 0,326935   | no  |
| AN4021 | ChrII_A_nidulans_FGSC_A4:2320306-2321741 | WT_5hasex | WT_veg | OK     | 29,9818  | 62,6823  | 1,06397       | -2,11245      | 0,0346475  | 0,135715   | no  |
| AN4022 | ChrII_A_nidulans_FGSC_A4:2317509-2319762 | WT_5hasex | WT_veg | OK     | 4,99509  | 16,6401  | 1,73608       | -2,8292       | 0,00466642 | 0,0281522  | yes |



## Supplementary table 1

|        |                                          |           |        |        |          |         |            |           |            |            |     |
|--------|------------------------------------------|-----------|--------|--------|----------|---------|------------|-----------|------------|------------|-----|
| AN4023 | ChrII_A_nidulans_FGSC_A4:2315225-2315783 | WT_5hasex | WT_veg | OK     | 39,1375  | 56,6794 | 0,534275   | -0,941526 | 0,346436   | 0,621837   | no  |
| AN4024 | ChrII_A_nidulans_FGSC_A4:2312522-2314117 | WT_5hasex | WT_veg | OK     | 43,3275  | 54,8415 | 0,339984   | -0,691442 | 0,489288   | 0,742251   | no  |
| AN4025 | ChrII_A_nidulans_FGSC_A4:2311017-2311958 | WT_5hasex | WT_veg | OK     | 125,54   | 562,844 | 2,16458    | -4,43226  | 9,3249E-06 | 0,00013525 | yes |
| AN4026 | ChrII_A_nidulans_FGSC_A4:2306285-2308877 | WT_5hasex | WT_veg | OK     | 58,5546  | 103,803 | 0,825997   | -1,70502  | 0,08819    | 0,265367   | no  |
| AN4027 | ChrII_A_nidulans_FGSC_A4:2303162-2304647 | WT_5hasex | WT_veg | OK     | 22,1722  | 33,0335 | 0,575183   | -1,09848  | 0,271995   | 0,544524   | no  |
| AN4028 | ChrII_A_nidulans_FGSC_A4:2298866-2302554 | WT_5hasex | WT_veg | OK     | 19,3143  | 31,3912 | 0,700689   | -1,43447  | 0,151439   | 0,38136    | no  |
| AN4029 | ChrII_A_nidulans_FGSC_A4:2297615-2298006 | WT_5hasex | WT_veg | OK     | 1,7522   | 16,3574 | 3,22271    | -2,47105  | 0,0134718  | 0,0658274  | no  |
| AN4031 | ChrII_A_nidulans_FGSC_A4:2290079-2291015 | WT_5hasex | WT_veg | OK     | 71,8892  | 69,8421 | -0,0416784 | 0,0834639 | 0,933483   | 0,974948   | no  |
| AN4032 | ChrII_A_nidulans_FGSC_A4:2286633-2289475 | WT_5hasex | WT_veg | OK     | 10,6615  | 13,7771 | 0,369853   | -0,695225 | 0,486914   | 0,740583   | no  |
| AN4033 | ChrII_A_nidulans_FGSC_A4:2285484-2286205 | WT_5hasex | WT_veg | OK     | 120,203  | 161,136 | 0,422798   | -0,851985 | 0,394222   | 0,667265   | no  |
| AN4036 | ChrII_A_nidulans_FGSC_A4:2276928-2278261 | WT_5hasex | WT_veg | OK     | 18,3     | 30,0955 | 0,717706   | -1,29213  | 0,196311   | 0,449218   | no  |
| AN4037 | ChrII_A_nidulans_FGSC_A4:2271647-2275652 | WT_5hasex | WT_veg | OK     | 11,7569  | 10,6137 | -0,147584  | 0,281876  | 0,778038   | 0,909189   | no  |
| AN4038 | ChrII_A_nidulans_FGSC_A4:2266587-2271357 | WT_5hasex | WT_veg | OK     | 54,6147  | 135,02  | 1,30581    | -2,58584  | 0,00971423 | 0,0508893  | no  |
| AN4039 | ChrII_A_nidulans_FGSC_A4:2266587-2271357 | WT_5hasex | WT_veg | OK     | 46,014   | 167,573 | 1,86465    | -3,72196  | 0,00019769 | 0,00197279 | yes |
| AN4040 | ChrII_A_nidulans_FGSC_A4:2264620-2266247 | WT_5hasex | WT_veg | NOTEST | 0,398982 | 1,92155 | 2,26787    | -2,09816  | 0,0358912  | 1          | no  |
| AN4041 | ChrII_A_nidulans_FGSC_A4:2263044-2263626 | WT_5hasex | WT_veg | OK     | 8,68517  | 10,4113 | 0,261522   | -0,334557 | 0,73796    | 0,88986    | no  |
| AN4043 | ChrII_A_nidulans_FGSC_A4:2256336-2258365 | WT_5hasex | WT_veg | OK     | 47,4982  | 65,3549 | 0,460421   | -0,951684 | 0,341257   | 0,616882   | no  |
| AN4045 | ChrII_A_nidulans_FGSC_A4:2246240-2247632 | WT_5hasex | WT_veg | OK     | 15,5026  | 23,6036 | 0,606499   | -1,09029  | 0,275586   | 0,548722   | no  |
| AN4046 | ChrII_A_nidulans_FGSC_A4:2243653-2245510 | WT_5hasex | WT_veg | OK     | 34,9514  | 187,16  | 2,42085    | -5,01692  | 5,2508E-07 | 1,0301E-05 | yes |
| AN4047 | ChrII_A_nidulans_FGSC_A4:2242117-2243458 | WT_5hasex | WT_veg | OK     | 2,7144   | 2,95102 | 0,12058    | -0,146296 | 0,883688   | 0,955883   | no  |
| AN4048 | ChrII_A_nidulans_FGSC_A4:2240357-2241823 | WT_5hasex | WT_veg | OK     | 14,2969  | 32,7793 | 1,19709    | -2,12784  | 0,03335    | 0,131686   | no  |
| AN4049 | ChrII_A_nidulans_FGSC_A4:2239306-2240216 | WT_5hasex | WT_veg | OK     | 860,635  | 1069,07 | 0,312888   | -0,509081 | 0,610695   | 0,819421   | no  |
| AN4050 | ChrII_A_nidulans_FGSC_A4:2234357-2236289 | WT_5hasex | WT_veg | OK     | 25,8523  | 37,7356 | 0,545633   | -1,02015  | 0,307659   | 0,583664   | no  |
| AN4051 | ChrII_A_nidulans_FGSC_A4:2232434-2233782 | WT_5hasex | WT_veg | OK     | 1073,87  | 1633,15 | 0,604834   | -0,997322 | 0,318608   | 0,594682   | no  |
| AN4053 | ChrII_A_nidulans_FGSC_A4:2224626-2228283 | WT_5hasex | WT_veg | OK     | 12,7374  | 25,1094 | 0,979161   | -1,96008  | 0,0499861  | 0,177512   | no  |
| AN4054 | ChrII_A_nidulans_FGSC_A4:2222197-2223834 | WT_5hasex | WT_veg | OK     | 8,42691  | 13,9859 | 0,730896   | -1,19687  | 0,231356   | 0,495627   | no  |
| AN4055 | ChrII_A_nidulans_FGSC_A4:2220579-2221948 | WT_5hasex | WT_veg | OK     | 83,8838  | 68,0035 | -0,302783  | 0,543978  | 0,586457   | 0,805183   | no  |
| AN4057 | ChrII_A_nidulans_FGSC_A4:2214368-2216408 | WT_5hasex | WT_veg | OK     | 58,4312  | 168,921 | 1,53154    | -3,12113  | 0,00180162 | 0,0127907  | yes |
| AN4058 | ChrII_A_nidulans_FGSC_A4:2210860-2212924 | WT_5hasex | WT_veg | OK     | 26,8311  | 28,1079 | 0,0670696  | -0,134674 | 0,89287    | 0,959154   | no  |
| AN4059 | ChrII_A_nidulans_FGSC_A4:2209591-2210339 | WT_5hasex | WT_veg | NOTEST | 0        | 0       | 0          | 0         | 1          | 1          | no  |
| AN4061 | ChrII_A_nidulans_FGSC_A4:2206470-2207051 | WT_5hasex | WT_veg | OK     | 13,7453  | 18,1989 | 0,404911   | -0,550532 | 0,581954   | 0,802304   | no  |
| AN4062 | ChrII_A_nidulans_FGSC_A4:2202356-2203864 | WT_5hasex | WT_veg | OK     | 65,2043  | 168,17  | 1,36688    | -2,81736  | 0,00484201 | 0,0289879  | yes |
| AN4063 | ChrII_A_nidulans_FGSC_A4:2200586-2202014 | WT_5hasex | WT_veg | OK     | 31,6041  | 93,6267 | 1,56681    | -3,1239   | 0,00178468 | 0,0127031  | yes |
| AN4064 | ChrII_A_nidulans_FGSC_A4:2198855-2200464 | WT_5hasex | WT_veg | OK     | 2926,99  | 7366,48 | 1,33156    | -1,572    | 0,115951   | 0,319979   | yes |
| AN4065 | ChrII_A_nidulans_FGSC_A4:2195769-2197737 | WT_5hasex | WT_veg | OK     | 24,4969  | 160,102 | 2,70832    | -5,4676   | 4,5617E-08 | 1,1453E-06 | yes |
| AN4066 | ChrII_A_nidulans_FGSC_A4:2191000-2195411 | WT_5hasex | WT_veg | OK     | 19,2485  | 34,2375 | 0,830833   | -1,69455  | 0,09016    | 0,269467   | no  |
| AN4067 | ChrII_A_nidulans_FGSC_A4:2190269-2190908 | WT_5hasex | WT_veg | OK     | 9,32536  | 9,05795 | -0,0419749 | 0,0576761 | 0,954007   | 0,982911   | no  |
| AN4068 | ChrII_A_nidulans_FGSC_A4:2188651-2189972 | WT_5hasex | WT_veg | OK     | 15,0248  | 13,1428 | -0,193072  | 0,328979  | 0,742171   | 0,891554   | no  |
| AN4070 | ChrII_A_nidulans_FGSC_A4:2184678-2187085 | WT_5hasex | WT_veg | OK     | 97,0207  | 110,021 | 0,181409   | -0,371863 | 0,709995   | 0,87517    | no  |
| AN4071 | ChrII_A_nidulans_FGSC_A4:2184678-2187085 | WT_5hasex | WT_veg | OK     | 37,8225  | 63,0424 | 0,737078   | -1,45716  | 0,145072   | 0,371031   | no  |
| AN4072 | ChrII_A_nidulans_FGSC_A4:2179437-2183445 | WT_5hasex | WT_veg | OK     | 57,6854  | 95,2512 | 0,72353    | -1,46063  | 0,144118   | 0,369493   | no  |
| AN4073 | ChrII_A_nidulans_FGSC_A4:2178405-2179162 | WT_5hasex | WT_veg | OK     | 1565,73  | 1751,08 | 0,161407   | -0,278886 | 0,780332   | 0,910347   | no  |
| AN4074 | ChrII_A_nidulans_FGSC_A4:2176069-2177952 | WT_5hasex | WT_veg | OK     | 17,6653  | 17,8381 | 0,0140421  | -0,026648 | 0,978741   | 0,992491   | no  |
| AN4075 | ChrII_A_nidulans_FGSC_A4:2174356-2174926 | WT_5hasex | WT_veg | OK     | 18,712   | 23,7004 | 0,340946   | -0,527899 | 0,59757    | 0,811713   | no  |
| AN4076 | ChrII_A_nidulans_FGSC_A4:2169409-2173139 | WT_5hasex | WT_veg | OK     | 23,1115  | 42,2038 | 0,868765   | -1,69101  | 0,0908351  | 0,270621   | no  |
| AN4077 | ChrII_A_nidulans_FGSC_A4:2165863-2167587 | WT_5hasex | WT_veg | OK     | 29,5885  | 53,3733 | 0,851081   | -1,65538  | 0,097847   | 0,284854   | no  |
| AN4078 | ChrII_A_nidulans_FGSC_A4:2163180-2164379 | WT_5hasex | WT_veg | OK     | 3,78742  | 7,85216 | 1,05187    | -1,20394  | 0,228612   | 0,491698   | no  |
| AN4079 | ChrII_A_nidulans_FGSC_A4:2159153-2160841 | WT_5hasex | WT_veg | OK     | 22,9571  | 45,0734 | 0,973334   | -1,80679  | 0,0707948  | 0,227311   | no  |
| AN4080 | ChrII_A_nidulans_FGSC_A4:2156154-2157874 | WT_5hasex | WT_veg | OK     | 79,6163  | 154,843 | 0,959668   | -1,98913  | 0,0466873  | 0,169203   | no  |
| AN4081 | ChrII_A_nidulans_FGSC_A4:2154588-2155778 | WT_5hasex | WT_veg | OK     | 220,091  | 213,709 | -0,0424544 | 0,0871205 | 0,930576   | 0,973566   | no  |
| AN4082 | ChrII_A_nidulans_FGSC_A4:2151685-2154157 | WT_5hasex | WT_veg | OK     | 26,2694  | 36,1078 | 0,458927   | -0,841003 | 0,400346   | 0,672477   | no  |
| AN4083 | ChrII_A_nidulans_FGSC_A4:2149163-2150725 | WT_5hasex | WT_veg | OK     | 14,5155  | 12,4061 | -0,226541  | 0,396832  | 0,691491   | 0,864459   | no  |
| AN4084 | ChrII_A_nidulans_FGSC_A4:2146680-2148466 | WT_5hasex | WT_veg | OK     | 33,2868  | 63,1747 | 0,924396   | -1,85499  | 0,0635979  | 0,210528   | no  |

## Supplementary table 1

|        |                                          |           |        |        |          |          |               |               |            |            |     |
|--------|------------------------------------------|-----------|--------|--------|----------|----------|---------------|---------------|------------|------------|-----|
| AN4085 | ChrII_A_nidulans_FGSC_A4:2142705-2145148 | WT_5hasex | WT_veg | OK     | 129,272  | 197,949  | 0,614719      | -1,2265       | 0,220012   | 0,48134    | no  |
| AN4086 | ChrII_A_nidulans_FGSC_A4:2139477-2142054 | WT_5hasex | WT_veg | OK     | 80,1321  | 95,4608  | 0,252528      | -0,520305     | 0,602851   | 0,814863   | no  |
| AN4087 | ChrII_A_nidulans_FGSC_A4:2137842-2139202 | WT_5hasex | WT_veg | OK     | 937,917  | 1762,39  | 0,910004      | -1,57335      | 0,115638   | 0,319417   | no  |
| AN4088 | ChrII_A_nidulans_FGSC_A4:2115612-2117361 | WT_5hasex | WT_veg | OK     | 92,179   | 286,116  | 1,63409       | -3,14234      | 0,00167605 | 0,0120495  | yes |
| AN4089 | ChrII_A_nidulans_FGSC_A4:2111905-2114372 | WT_5hasex | WT_veg | OK     | 104,939  | 275,172  | 1,39078       | -2,69904      | 0,00695401 | 0,0389154  | yes |
| AN4090 | ChrII_A_nidulans_FGSC_A4:2111414-2111735 | WT_5hasex | WT_veg | OK     | 35,8423  | 48,7199  | 0,442849      | -0,675688     | 0,499239   | 0,749151   | no  |
| AN4091 | ChrII_A_nidulans_FGSC_A4:2106442-2110359 | WT_5hasex | WT_veg | OK     | 2,1052   | 0,330406 | -2,67164      | 1,86874       | 0,0616593  | 0,206171   | no  |
| AN4092 | ChrII_A_nidulans_FGSC_A4:2104224-2105866 | WT_5hasex | WT_veg | OK     | 12,9681  | 11,1527  | -0,217571     | 0,382438      | 0,702136   | 0,870533   | no  |
| AN4093 | ChrII_A_nidulans_FGSC_A4:2100353-2102351 | WT_5hasex | WT_veg | OK     | 5,61749  | 7,70561  | 0,455983      | -0,702308     | 0,482487   | 0,736993   | no  |
| AN4094 | ChrII_A_nidulans_FGSC_A4:2098621-2100188 | WT_5hasex | WT_veg | OK     | 97,0284  | 329,535  | 1,76395       | -3,68524      | 0,00022849 | 0,00223547 | yes |
| AN4095 | ChrII_A_nidulans_FGSC_A4:2096550-2098324 | WT_5hasex | WT_veg | OK     | 102,18   | 215,511  | 1,07665       | -2,20983      | 0,0271172  | 0,112172   | no  |
| AN4096 | ChrII_A_nidulans_FGSC_A4:2092915-2096110 | WT_5hasex | WT_veg | OK     | 6,10432  | 9,01323  | 0,562214      | -0,981815     | 0,326191   | 0,602569   | no  |
| AN4097 | ChrII_A_nidulans_FGSC_A4:2090752-2092338 | WT_5hasex | WT_veg | OK     | 6,04631  | 8,54879  | 0,499666      | -0,739233     | 0,459765   | 0,720015   | no  |
| AN4098 | ChrII_A_nidulans_FGSC_A4:2089133-2090520 | WT_5hasex | WT_veg | OK     | 3,70972  | 5,97439  | 0,687479      | -0,930869     | 0,351922   | 0,627493   | no  |
| AN4100 | ChrII_A_nidulans_FGSC_A4:2084470-2085249 | WT_5hasex | WT_veg | OK     | 3,37017  | 14,2142  | 2,07644       | -2,63026      | 0,00853187 | 0,0459257  | yes |
| AN4101 | ChrII_A_nidulans_FGSC_A4:2083155-2084445 | WT_5hasex | WT_veg | OK     | 3,54095  | 16,381   | 2,20981       | -2,98477      | 0,00283788 | 0,0186611  | yes |
| AN4103 | ChrII_A_nidulans_FGSC_A4:2075934-2077849 | WT_5hasex | WT_veg | OK     | 4,46849  | 9,38157  | 1,07004       | -1,47655      | 0,139796   | 0,362152   | no  |
| AN4104 | ChrII_A_nidulans_FGSC_A4:2073230-2074569 | WT_5hasex | WT_veg | OK     | 4,87587  | 6,67404  | 0,452902      | -0,626657     | 0,530884   | 0,770129   | no  |
| AN4105 | ChrII_A_nidulans_FGSC_A4:2069379-2072925 | WT_5hasex | WT_veg | OK     | 9,43892  | 16,5365  | 0,808959      | -1,28736      | 0,197969   | 0,45173    | no  |
| AN4106 | ChrII_A_nidulans_FGSC_A4:2069379-2072925 | WT_5hasex | WT_veg | NOTEST | 0,521948 | 0,507683 | -0,0399785    | 0,0287915     | 0,977031   | 1          | no  |
| AN4107 | ChrII_A_nidulans_FGSC_A4:2066116-2068555 | WT_5hasex | WT_veg | NOTEST | 0,40849  | 0        | -1.79769e+308 | -1.79769e+308 | 0,0537957  | 1          | no  |
| AN4108 | ChrII_A_nidulans_FGSC_A4:2063930-2065288 | WT_5hasex | WT_veg | NOTEST | 0,405795 | 1,51374  | 1,8993        | -1,34213      | 0,179555   | 1          | no  |
| AN4109 | ChrII_A_nidulans_FGSC_A4:2061588-2063751 | WT_5hasex | WT_veg | NOTEST | 1,05305  | 0,411936 | -1,35408      | 0,850805      | 0,394878   | 1          | no  |
| AN4110 | ChrII_A_nidulans_FGSC_A4:2059560-2061219 | WT_5hasex | WT_veg | NOTEST | 1,38961  | 1,22799  | -0,178381     | 0,16741       | 0,867047   | 1          | no  |
| AN4111 | ChrII_A_nidulans_FGSC_A4:2057768-2059029 | WT_5hasex | WT_veg | OK     | 5,62331  | 3,19802  | -0,814238     | 0,964182      | 0,334955   | 0,611212   | no  |
| AN4112 | ChrII_A_nidulans_FGSC_A4:2055190-2057041 | WT_5hasex | WT_veg | OK     | 62,8673  | 117,213  | 0,898754      | -1,85323      | 0,0638495  | 0,211161   | no  |
| AN4113 | ChrII_A_nidulans_FGSC_A4:2050750-2054594 | WT_5hasex | WT_veg | OK     | 206,68   | 805,023  | 1,96163       | -3,18806      | 0,00143229 | 0,0105607  | yes |
| AN4114 | ChrII_A_nidulans_FGSC_A4:2044365-2046785 | WT_5hasex | WT_veg | OK     | 0,831301 | 5,47987  | 2,7207        | -2,87373      | 0,00405655 | 0,0250585  | yes |
| AN4115 | ChrII_A_nidulans_FGSC_A4:2040659-2041999 | WT_5hasex | WT_veg | NOTEST | 1,12259  | 2,39363  | 1,09237       | -1,15363      | 0,248653   | 1          | no  |
| AN4116 | ChrII_A_nidulans_FGSC_A4:2038451-2040026 | WT_5hasex | WT_veg | NOTEST | 0,511178 | 0,1725   | -1,56723      | 0,512087      | 0,60859    | 1          | no  |
| AN4118 | ChrII_A_nidulans_FGSC_A4:2032188-2033868 | WT_5hasex | WT_veg | OK     | 6,45036  | 3,26111  | -0,984018     | 1,32168       | 0,186274   | 0,43537    | no  |
| AN4119 | ChrII_A_nidulans_FGSC_A4:2030219-2031888 | WT_5hasex | WT_veg | OK     | 404,778  | 8,4472   | -5,58252      | 8,01465       | 1,1102E-15 | 9,0761E-14 | yes |
| AN4120 | ChrII_A_nidulans_FGSC_A4:2026356-2027592 | WT_5hasex | WT_veg | OK     | 111,918  | 20,3193  | -2,46152      | 4,17502       | 2,9796E-05 | 0,00038166 | yes |
| AN4121 | ChrII_A_nidulans_FGSC_A4:2023374-2025233 | WT_5hasex | WT_veg | NOTEST | 0,711062 | 3,5517   | 2,32046       | -2,63532      | 0,00840588 | 1          | no  |
| AN4122 | ChrII_A_nidulans_FGSC_A4:2020523-2021936 | WT_5hasex | WT_veg | OK     | 9,6747   | 5,55997  | -0,79914      | 1,02285       | 0,306378   | 0,582645   | no  |
| AN4123 | ChrII_A_nidulans_FGSC_A4:2018629-2020036 | WT_5hasex | WT_veg | OK     | 2,75019  | 4,03467  | 0,552919      | -0,633869     | 0,526166   | 0,767364   | no  |
| AN4124 | ChrII_A_nidulans_FGSC_A4:2016974-2018549 | WT_5hasex | WT_veg | OK     | 5,64019  | 7,46869  | 0,405113      | -0,516837     | 0,60527    | 0,81657    | no  |
| AN4125 | ChrII_A_nidulans_FGSC_A4:2015937-2016345 | WT_5hasex | WT_veg | OK     | 0        | 6,19365  | 1.79769e+308  | 1.79769e+308  | 0,0120369  | 0,0603192  | no  |
| AN4126 | ChrII_A_nidulans_FGSC_A4:2013509-2015303 | WT_5hasex | WT_veg | OK     | 4,94302  | 3,70997  | -0,413983     | 0,578047      | 0,563232   | 0,791019   | no  |
| AN4127 | ChrII_A_nidulans_FGSC_A4:2010140-2011047 | WT_5hasex | WT_veg | OK     | 3707,78  | 608,613  | -2,60696      | 3,07813       | 0,00208301 | 0,0144517  | yes |
| AN4129 | ChrII_A_nidulans_FGSC_A4:1999767-2001827 | WT_5hasex | WT_veg | NOTEST | 0,866371 | 0,345426 | -1,32661      | 0,855046      | 0,392526   | 1          | no  |
| AN4130 | ChrII_A_nidulans_FGSC_A4:1998213-1998663 | WT_5hasex | WT_veg | NOTEST | 0,585896 | 0        | -1.79769e+308 | -1.79769e+308 | 0,165569   | 1          | no  |
| AN4131 | ChrII_A_nidulans_FGSC_A4:1994343-1996264 | WT_5hasex | WT_veg | OK     | 3,58735  | 2,55307  | -0,490683     | 0,598913      | 0,549231   | 0,78162    | no  |
| AN4132 | ChrII_A_nidulans_FGSC_A4:1989089-1990192 | WT_5hasex | WT_veg | NOTEST | 0,200914 | 0        | -1.79769e+308 | -1.79769e+308 | 0,224063   | 1          | no  |
| AN4133 | ChrII_A_nidulans_FGSC_A4:1986012-1987376 | WT_5hasex | WT_veg | OK     | 1,02424  | 4,98297  | 2,28245       | -2,24128      | 0,025008   | 0,10547    | no  |
| AN4136 | ChrII_A_nidulans_FGSC_A4:1979632-1981009 | WT_5hasex | WT_veg | OK     | 3,98394  | 12,2426  | 1,61965       | -2,34217      | 0,019172   | 0,0861653  | no  |
| AN4137 | ChrII_A_nidulans_FGSC_A4:1978462-1979016 | WT_5hasex | WT_veg | NOTEST | 0        | 0        | 0             | 0             | 1          | 1          | no  |
| AN4138 | ChrII_A_nidulans_FGSC_A4:1974948-1975995 | WT_5hasex | WT_veg | NOTEST | 0,331688 | 1,32408  | 1,99709       | -0,869833     | 0,384392   | 1          | no  |
| AN4140 | ChrII_A_nidulans_FGSC_A4:1966664-1968983 | WT_5hasex | WT_veg | NOTEST | 0,556297 | 1,52445  | 1,45436       | -1,53851      | 0,123923   | 1          | no  |
| AN4141 | ChrII_A_nidulans_FGSC_A4:1965690-1966335 | WT_5hasex | WT_veg | NOTEST | 0        | 0        | 0             | 0             | 1          | 1          | no  |
| AN4142 | ChrII_A_nidulans_FGSC_A4:1962811-1964626 | WT_5hasex | WT_veg | NOTEST | 0,370038 | 0        | -1.79769e+308 | -1.79769e+308 | 0,0908325  | 1          | no  |
| AN4143 | ChrII_A_nidulans_FGSC_A4:1958909-1959293 | WT_5hasex | WT_veg | NOTEST | 0        | 0        | 0             | 0             | 1          | 1          | no  |
| AN4144 | ChrII_A_nidulans_FGSC_A4:1957008-1957855 | WT_5hasex | WT_veg | NOTEST | 0,241502 | 0        | -1.79769e+308 | -1.79769e+308 | 0,165569   | 1          | no  |

## Supplementary table 1

|        |                                          |           |        |        |          |          |           |           |            |            |     |
|--------|------------------------------------------|-----------|--------|--------|----------|----------|-----------|-----------|------------|------------|-----|
| AN4146 | ChrII_A_nidulans_FGSC_A4:1949885-1950586 | WT_5hasex | WT_veg | OK     | 53,0614  | 87,7966  | 0,726502  | -1,40335  | 0,160512   | 0,396079   | no  |
| AN4147 | ChrII_A_nidulans_FGSC_A4:1948463-1949352 | WT_5hasex | WT_veg | OK     | 13,6592  | 20,3297  | 0,573718  | -0,877306 | 0,38032    | 0,654706   | no  |
| AN4148 | ChrII_A_nidulans_FGSC_A4:1944776-1946741 | WT_5hasex | WT_veg | OK     | 129,553  | 504,066  | 1,96008   | -3,25292  | 0,00114224 | 0,00875977 | yes |
| AN4149 | ChrII_A_nidulans_FGSC_A4:1942783-1944291 | WT_5hasex | WT_veg | OK     | 4,58076  | 11,0388  | 1,26893   | -1,89312  | 0,0583418  | 0,198071   | no  |
| AN4150 | ChrII_A_nidulans_FGSC_A4:1938947-1940778 | WT_5hasex | WT_veg | OK     | 8,3932   | 13,9019  | 0,727992  | -1,21459  | 0,224524   | 0,48656    | no  |
| AN4151 | ChrII_A_nidulans_FGSC_A4:1936664-1938293 | WT_5hasex | WT_veg | OK     | 39,3754  | 171,323  | 2,12135   | -4,0912   | 4,2914E-05 | 0,00052493 | yes |
| AN4153 | ChrII_A_nidulans_FGSC_A4:1930674-1931938 | WT_5hasex | WT_veg | NOTEST | 0,201736 | 1,60288  | 2,99012   | -1,37246  | 0,169919   | 1          | no  |
| AN4154 | ChrII_A_nidulans_FGSC_A4:1928106-1929702 | WT_5hasex | WT_veg | OK     | 13,2615  | 32,2933  | 1,28399   | -2,13286  | 0,0329361  | 0,13037    | no  |
| AN4155 | ChrII_A_nidulans_FGSC_A4:1925896-1927113 | WT_5hasex | WT_veg | NOTEST | 0        | 0        | 0         | 0         | 1          | 1          | no  |
| AN4156 | ChrII_A_nidulans_FGSC_A4:1923794-1925605 | WT_5hasex | WT_veg | NOTEST | 0,138238 | 0,605608 | 2,13123   | -0,888443 | 0,374303   | 1          | no  |
| AN4157 | ChrII_A_nidulans_FGSC_A4:1921449-1923637 | WT_5hasex | WT_veg | NOTEST | 0        | 0        | 0         | 0         | 1          | 1          | no  |
| AN4158 | ChrII_A_nidulans_FGSC_A4:1919516-1920111 | WT_5hasex | WT_veg | OK     | 1,24168  | 5,71629  | 2,20278   | -1,57679  | 0,114845   | 0,318013   | no  |
| AN4160 | ChrII_A_nidulans_FGSC_A4:1910207-1913058 | WT_5hasex | WT_veg | OK     | 24,1244  | 31,0751  | 0,365266  | -0,739374 | 0,45968    | 0,719931   | no  |
| AN4161 | ChrII_A_nidulans_FGSC_A4:1907504-1908763 | WT_5hasex | WT_veg | OK     | 17,7055  | 51,9254  | 1,55224   | -2,79509  | 0,00518845 | 0,030635   | yes |
| AN4162 | ChrII_A_nidulans_FGSC_A4:1905539-1907274 | WT_5hasex | WT_veg | OK     | 41,8323  | 156,917  | 1,90731   | -3,97225  | 7,1196E-05 | 0,00081548 | yes |
| AN4164 | ChrII_A_nidulans_FGSC_A4:1902214-1903341 | WT_5hasex | WT_veg | OK     | 86,1401  | 374,722  | 2,12106   | -4,42935  | 9,4517E-06 | 0,00013686 | yes |
| AN4165 | ChrII_A_nidulans_FGSC_A4:1900838-1901687 | WT_5hasex | WT_veg | OK     | 169,097  | 198,662  | 0,232467  | -0,477456 | 0,633037   | 0,832094   | no  |
| AN4167 | ChrII_A_nidulans_FGSC_A4:1895388-1897349 | WT_5hasex | WT_veg | OK     | 38,9364  | 47,967   | 0,300924  | -0,618287 | 0,536386   | 0,773305   | no  |
| AN4168 | ChrII_A_nidulans_FGSC_A4:1892887-1894909 | WT_5hasex | WT_veg | OK     | 65,2018  | 191,886  | 1,55727   | -3,15425  | 0,00160913 | 0,0116547  | yes |
| AN4169 | ChrII_A_nidulans_FGSC_A4:1886482-1889287 | WT_5hasex | WT_veg | OK     | 27,6907  | 53,5816  | 0,952337  | -1,96547  | 0,0493601  | 0,176017   | no  |
| AN4171 | ChrII_A_nidulans_FGSC_A4:1875262-1877268 | WT_5hasex | WT_veg | OK     | 139,945  | 435,467  | 1,6377    | -3,23424  | 0,00121968 | 0,00924809 | yes |
| AN4172 | ChrII_A_nidulans_FGSC_A4:1873680-1874893 | WT_5hasex | WT_veg | OK     | 129,552  | 62,0876  | -1,06115  | 2,1616    | 0,0306489  | 0,123325   | no  |
| AN4173 | ChrII_A_nidulans_FGSC_A4:1869822-1871473 | WT_5hasex | WT_veg | OK     | 4,92513  | 1,8256   | -1,43179  | 1,69701   | 0,089695   | 0,268583   | no  |
| AN4174 | ChrII_A_nidulans_FGSC_A4:1867077-1868476 | WT_5hasex | WT_veg | OK     | 138,081  | 285,856  | 1,04977   | -2,12424  | 0,0336504  | 0,132633   | no  |
| AN4175 | ChrII_A_nidulans_FGSC_A4:1862259-1865581 | WT_5hasex | WT_veg | OK     | 10,9501  | 21,8634  | 0,99757   | -1,87236  | 0,0611568  | 0,204893   | no  |
| AN4176 | ChrII_A_nidulans_FGSC_A4:1860165-1861943 | WT_5hasex | WT_veg | OK     | 1,74184  | 5,18536  | 1,57383   | -2,06383  | 0,0390335  | 0,148158   | no  |
| AN4177 | ChrII_A_nidulans_FGSC_A4:1858340-1859659 | WT_5hasex | WT_veg | OK     | 2,32897  | 9,77939  | 2,07005   | -2,71799  | 0,0065679  | 0,0372359  | yes |
| AN4180 | ChrII_A_nidulans_FGSC_A4:1850398-1852196 | WT_5hasex | WT_veg | OK     | 9,88233  | 22,1533  | 1,1646    | -1,85889  | 0,0630428  | 0,209168   | no  |
| AN4181 | ChrII_A_nidulans_FGSC_A4:1848353-1850053 | WT_5hasex | WT_veg | OK     | 5,39106  | 12,8108  | 1,24872   | -1,84294  | 0,0653384  | 0,214676   | no  |
| AN4185 | ChrII_A_nidulans_FGSC_A4:1831059-1833158 | WT_5hasex | WT_veg | OK     | 5,32434  | 7,03179  | 0,40129   | -0,631176 | 0,527926   | 0,768134   | no  |
| AN4187 | ChrII_A_nidulans_FGSC_A4:1823030-1830133 | WT_5hasex | WT_veg | OK     | 26,1261  | 68,7875  | 1,39666   | -2,90585  | 0,00366257 | 0,0230986  | yes |
| AN4188 | ChrII_A_nidulans_FGSC_A4:1818025-1820968 | WT_5hasex | WT_veg | OK     | 25,7912  | 31,765   | 0,300556  | -0,622171 | 0,533829   | 0,772203   | no  |
| AN4190 | ChrII_A_nidulans_FGSC_A4:1810836-1811589 | WT_5hasex | WT_veg | OK     | 2522,15  | 3046,93  | 0,272706  | -0,452372 | 0,651001   | 0,842211   | no  |
| AN4191 | ChrII_A_nidulans_FGSC_A4:1808443-1809151 | WT_5hasex | WT_veg | OK     | 7,1974   | 48,2651  | 2,74543   | -3,98325  | 6,7978E-05 | 0,00078325 | yes |
| AN4192 | ChrII_A_nidulans_FGSC_A4:1805300-1807311 | WT_5hasex | WT_veg | OK     | 38,6067  | 152,843  | 1,98513   | -4,14844  | 3,3475E-05 | 0,00042192 | yes |
| AN4193 | ChrII_A_nidulans_FGSC_A4:1802045-1804510 | WT_5hasex | WT_veg | OK     | 38,9673  | 54,9053  | 0,494682  | -0,992222 | 0,321089   | 0,597441   | no  |
| AN4195 | ChrII_A_nidulans_FGSC_A4:1792084-1794454 | WT_5hasex | WT_veg | OK     | 15,2292  | 33,5308  | 1,13865   | -2,00361  | 0,045112   | 0,164881   | no  |
| AN4196 | ChrII_A_nidulans_FGSC_A4:1790205-1791945 | WT_5hasex | WT_veg | OK     | 22,2939  | 63,9525  | 1,52035   | -2,71689  | 0,00658981 | 0,0373278  | yes |
| AN4197 | ChrII_A_nidulans_FGSC_A4:1786822-1789111 | WT_5hasex | WT_veg | OK     | 83,7218  | 226,797  | 1,43772   | -2,75369  | 0,00589278 | 0,0339856  | yes |
| AN4198 | ChrII_A_nidulans_FGSC_A4:1784860-1786481 | WT_5hasex | WT_veg | OK     | 5,48756  | 33,9568  | 2,62946   | -3,97979  | 6,8977E-05 | 0,00079406 | yes |
| AN4199 | ChrII_A_nidulans_FGSC_A4:1777899-1779000 | WT_5hasex | WT_veg | OK     | 6,70276  | 27,7546  | 2,0499    | -3,05613  | 0,00224217 | 0,0153664  | yes |
| AN4201 | ChrII_A_nidulans_FGSC_A4:1766439-1768519 | WT_5hasex | WT_veg | OK     | 43,6107  | 36,305   | -0,264516 | 0,54216   | 0,587708   | 0,805755   | no  |
| AN4203 | ChrII_A_nidulans_FGSC_A4:1760219-1761282 | WT_5hasex | WT_veg | OK     | 3,05548  | 3,56756  | 0,223541  | -0,256746 | 0,797375   | 0,918068   | no  |
| AN4206 | ChrII_A_nidulans_FGSC_A4:1749580-1751647 | WT_5hasex | WT_veg | OK     | 315,914  | 329,897  | 0,0624856 | -0,11132  | 0,911363   | 0,966468   | no  |
| AN4207 | ChrII_A_nidulans_FGSC_A4:1746175-1749251 | WT_5hasex | WT_veg | OK     | 42,233   | 69,1397  | 0,711142  | -1,46694  | 0,142393   | 0,366523   | no  |
| AN4208 | ChrII_A_nidulans_FGSC_A4:1741507-1745606 | WT_5hasex | WT_veg | OK     | 65,1003  | 271,357  | 2,05946   | -4,09421  | 4,236E-05  | 0,00051888 | yes |
| AN4209 | ChrII_A_nidulans_FGSC_A4:1741507-1745606 | WT_5hasex | WT_veg | OK     | 99,3441  | 103,206  | 0,0550149 | -0,111092 | 0,911544   | 0,966468   | no  |
| AN4210 | ChrII_A_nidulans_FGSC_A4:1736140-1740843 | WT_5hasex | WT_veg | OK     | 26,6737  | 57,7347  | 1,11402   | -2,22453  | 0,0261125  | 0,109145   | no  |
| AN4212 | ChrII_A_nidulans_FGSC_A4:1727477-1729427 | WT_5hasex | WT_veg | OK     | 21,5595  | 16,0778  | -0,423257 | 0,789511  | 0,429813   | 0,696403   | no  |
| AN4213 | ChrII_A_nidulans_FGSC_A4:1724714-1725999 | WT_5hasex | WT_veg | OK     | 30,8168  | 18,8242  | -0,711126 | 1,30843   | 0,190727   | 0,441607   | no  |
| AN4215 | ChrII_A_nidulans_FGSC_A4:1719976-1720611 | WT_5hasex | WT_veg | OK     | 304,17   | 711,124  | 1,22522   | -2,51307  | 0,0119686  | 0,06004    | no  |
| AN4216 | ChrII_A_nidulans_FGSC_A4:1718510-1719878 | WT_5hasex | WT_veg | OK     | 178,246  | 197,471  | 0,147778  | -0,277756 | 0,781199   | 0,910773   | no  |
| AN4217 | ChrII_A_nidulans_FGSC_A4:1716924-1718109 | WT_5hasex | WT_veg | OK     | 26,119   | 34,5176  | 0,402233  | -0,753484 | 0,451159   | 0,713075   | no  |

## Supplementary table 1

|        |                                          |           |        |    |         |         |           |           |            |            |     |
|--------|------------------------------------------|-----------|--------|----|---------|---------|-----------|-----------|------------|------------|-----|
| AN4218 | ChrII_A_nidulans_FGSC_A4:1711351-1713138 | WT_5hasex | WT_veg | OK | 2929,07 | 6918,21 | 1,23995   | -1,39548  | 0,162872   | 0,399458   | no  |
| AN4219 | ChrII_A_nidulans_FGSC_A4:1709796-1710366 | WT_5hasex | WT_veg | OK | 10,6742 | 26,3311 | 1,30264   | -1,80831  | 0,0705588  | 0,226924   | no  |
| AN4220 | ChrII_A_nidulans_FGSC_A4:1708492-1709129 | WT_5hasex | WT_veg | OK | 189,391 | 372,208 | 0,97474   | -2,01908  | 0,0434791  | 0,160382   | no  |
| AN4222 | ChrII_A_nidulans_FGSC_A4:1700123-1701139 | WT_5hasex | WT_veg | OK | 1423,33 | 1809,06 | 0,345967  | -0,59645  | 0,550874   | 0,782638   | no  |
| AN4223 | ChrII_A_nidulans_FGSC_A4:1691766-1698268 | WT_5hasex | WT_veg | OK | 27,314  | 46,8421 | 0,778165  | -1,47838  | 0,139307   | 0,361338   | no  |
| AN4224 | ChrII_A_nidulans_FGSC_A4:1689778-1691406 | WT_5hasex | WT_veg | OK | 181,652 | 487,447 | 1,42407   | -2,85314  | 0,00432899 | 0,0264898  | yes |
| AN4226 | ChrII_A_nidulans_FGSC_A4:1684327-1685840 | WT_5hasex | WT_veg | OK | 18,8741 | 87,663  | 2,21556   | -4,10496  | 4,0438E-05 | 0,00049778 | yes |
| AN4227 | ChrII_A_nidulans_FGSC_A4:1682958-1684196 | WT_5hasex | WT_veg | OK | 24,6698 | 56,3445 | 1,19153   | -2,19606  | 0,0280876  | 0,115249   | no  |
| AN4228 | ChrII_A_nidulans_FGSC_A4:1681006-1682494 | WT_5hasex | WT_veg | OK | 6,54595 | 7,617   | 0,218621  | -0,325727 | 0,744631   | 0,892644   | no  |
| AN4229 | ChrII_A_nidulans_FGSC_A4:1678593-1680803 | WT_5hasex | WT_veg | OK | 6,74859 | 25,6466 | 1,92611   | -3,26235  | 0,00110492 | 0,00852979 | yes |
| AN4230 | ChrII_A_nidulans_FGSC_A4:1676485-1678158 | WT_5hasex | WT_veg | OK | 13,3926 | 33,0908 | 1,305     | -2,28991  | 0,0220266  | 0,0958669  | no  |
| AN4231 | ChrII_A_nidulans_FGSC_A4:1675254-1676112 | WT_5hasex | WT_veg | OK | 140,047 | 282,404 | 1,01185   | -2,09014  | 0,0366052  | 0,14124    | no  |
| AN4232 | ChrII_A_nidulans_FGSC_A4:1673498-1675198 | WT_5hasex | WT_veg | OK | 18,2171 | 91,9317 | 2,33526   | -4,2609   | 2,0361E-05 | 0,0002707  | yes |
| AN4233 | ChrII_A_nidulans_FGSC_A4:1671844-1673305 | WT_5hasex | WT_veg | OK | 18,2222 | 92,1568 | 2,33839   | -4,26393  | 2,0087E-05 | 0,00026729 | yes |
| AN4235 | ChrII_A_nidulans_FGSC_A4:1667821-1668995 | WT_5hasex | WT_veg | OK | 34,2267 | 45,4707 | 0,409817  | -0,770933 | 0,440747   | 0,704933   | no  |
| AN4236 | ChrII_A_nidulans_FGSC_A4:1660743-1662512 | WT_5hasex | WT_veg | OK | 203,36  | 374,796 | 0,882068  | -1,75592  | 0,0791028  | 0,245827   | no  |
| AN4237 | ChrII_A_nidulans_FGSC_A4:1656925-1659345 | WT_5hasex | WT_veg | OK | 19,2292 | 16,864  | -0,189347 | 0,379688  | 0,704177   | 0,871873   | no  |
| AN4239 | ChrII_A_nidulans_FGSC_A4:1645933-1647881 | WT_5hasex | WT_veg | OK | 73,7169 | 253,039 | 1,77929   | -3,30218  | 0,00095937 | 0,00758954 | yes |
| AN4241 | ChrII_A_nidulans_FGSC_A4:1641526-1643386 | WT_5hasex | WT_veg | OK | 7,608   | 24,3063 | 1,67574   | -2,76465  | 0,00569832 | 0,0331009  | yes |
| AN4243 | ChrII_A_nidulans_FGSC_A4:1637306-1639090 | WT_5hasex | WT_veg | OK | 3,0373  | 7,99153 | 1,39568   | -1,96495  | 0,0494204  | 0,176172   | no  |
| AN4244 | ChrII_A_nidulans_FGSC_A4:1635989-1636686 | WT_5hasex | WT_veg | OK | 30,6139 | 54,1463 | 0,822673  | -1,44804  | 0,147605   | 0,375223   | no  |
| AN4245 | ChrII_A_nidulans_FGSC_A4:1632623-1635533 | WT_5hasex | WT_veg | OK | 12,4559 | 9,60034 | -0,375669 | 0,684542  | 0,493633   | 0,745199   | no  |
| AN4246 | ChrII_A_nidulans_FGSC_A4:1630180-1631998 | WT_5hasex | WT_veg | OK | 7,02413 | 21,3241 | 1,6021    | -2,406    | 0,016128   | 0,0756821  | no  |
| AN4247 | ChrII_A_nidulans_FGSC_A4:1626907-1629418 | WT_5hasex | WT_veg | OK | 34,3908 | 83,9675 | 1,28781   | -2,67982  | 0,0073661  | 0,0407828  | yes |
| AN4248 | ChrII_A_nidulans_FGSC_A4:1623126-1625574 | WT_5hasex | WT_veg | OK | 13,5813 | 31,7412 | 1,22473   | -1,95793  | 0,0502384  | 0,178143   | no  |
| AN4249 | ChrII_A_nidulans_FGSC_A4:1623126-1625574 | WT_5hasex | WT_veg | OK | 58,3078 | 194,998 | 1,7417    | -3,59738  | 0,00032144 | 0,00298705 | yes |
| AN4250 | ChrII_A_nidulans_FGSC_A4:1615413-1618158 | WT_5hasex | WT_veg | OK | 43,2425 | 52,5038 | 0,279971  | -0,562927 | 0,573485   | 0,7971     | no  |
| AN4251 | ChrII_A_nidulans_FGSC_A4:1615413-1618158 | WT_5hasex | WT_veg | OK | 63,1562 | 152,464 | 1,27147   | -2,58083  | 0,00985632 | 0,0514946  | no  |
| AN4252 | ChrII_A_nidulans_FGSC_A4:1612280-1613308 | WT_5hasex | WT_veg | OK | 1833,19 | 8095,18 | 2,14271   | -2,96699  | 0,0030073  | 0,0195835  | yes |
| AN4253 | ChrII_A_nidulans_FGSC_A4:1610062-1611396 | WT_5hasex | WT_veg | OK | 61,4337 | 183,874 | 1,58161   | -3,16601  | 0,00154548 | 0,0112653  | yes |
| AN4254 | ChrII_A_nidulans_FGSC_A4:1608948-1609844 | WT_5hasex | WT_veg | OK | 9,03548 | 13,9241 | 0,623907  | -0,904054 | 0,365967   | 0,6408     | no  |
| AN4256 | ChrII_A_nidulans_FGSC_A4:1604129-1604670 | WT_5hasex | WT_veg | OK | 15,3143 | 69,6354 | 2,18494   | -3,11542  | 0,00183685 | 0,0129986  | yes |
| AN4257 | ChrII_A_nidulans_FGSC_A4:1598920-1600911 | WT_5hasex | WT_veg | OK | 21,295  | 28,9377 | 0,442434  | -0,871301 | 0,38359    | 0,657319   | no  |
| AN4258 | ChrII_A_nidulans_FGSC_A4:1596860-1597536 | WT_5hasex | WT_veg | OK | 197,599 | 280,384 | 0,504828  | -1,03142  | 0,302346   | 0,578094   | no  |
| AN4259 | ChrII_A_nidulans_FGSC_A4:1595242-1596785 | WT_5hasex | WT_veg | OK | 80,3094 | 166,626 | 1,05297   | -2,17354  | 0,0297398  | 0,120575   | no  |
| AN4260 | ChrII_A_nidulans_FGSC_A4:1594183-1595066 | WT_5hasex | WT_veg | OK | 279,46  | 485,737 | 0,797536  | -1,6029   | 0,108957   | 0,307444   | no  |
| AN4261 | ChrII_A_nidulans_FGSC_A4:1593111-1593747 | WT_5hasex | WT_veg | OK | 18,8399 | 36,1739 | 0,941158  | -1,51783  | 0,129058   | 0,343679   | no  |
| AN4264 | ChrII_A_nidulans_FGSC_A4:1580068-1581939 | WT_5hasex | WT_veg | OK | 269,34  | 735,747 | 1,44978   | -2,28876  | 0,0220931  | 0,096021   | no  |
| AN4265 | ChrII_A_nidulans_FGSC_A4:1576693-1579685 | WT_5hasex | WT_veg | OK | 36,1092 | 89,429  | 1,30838   | -2,66211  | 0,00776533 | 0,0425658  | yes |
| AN4266 | ChrII_A_nidulans_FGSC_A4:1572883-1576057 | WT_5hasex | WT_veg | OK | 16,2027 | 41,4983 | 1,35682   | -2,65674  | 0,00789003 | 0,0430995  | yes |
| AN4267 | ChrII_A_nidulans_FGSC_A4:1566187-1570713 | WT_5hasex | WT_veg | OK | 31,2902 | 79,2801 | 1,34125   | -2,71067  | 0,00671472 | 0,0378879  | yes |
| AN4268 | ChrII_A_nidulans_FGSC_A4:1566187-1570713 | WT_5hasex | WT_veg | OK | 14,7469 | 38,8885 | 1,39893   | -2,49978  | 0,0124271  | 0,0618244  | no  |
| AN4269 | ChrII_A_nidulans_FGSC_A4:1564451-1565568 | WT_5hasex | WT_veg | OK | 85,125  | 202,272 | 1,24864   | -2,37146  | 0,0177179  | 0,081194   | no  |
| AN4270 | ChrII_A_nidulans_FGSC_A4:1559164-1563901 | WT_5hasex | WT_veg | OK | 19,2935 | 29,5919 | 0,617088  | -1,28794  | 0,197767   | 0,451506   | no  |
| AN4271 | ChrII_A_nidulans_FGSC_A4:1556771-1558745 | WT_5hasex | WT_veg | OK | 20,427  | 47,5134 | 1,21786   | -2,36028  | 0,0182613  | 0,0830379  | no  |
| AN4272 | ChrII_A_nidulans_FGSC_A4:1552841-1556294 | WT_5hasex | WT_veg | OK | 21,5591 | 50,0677 | 1,21558   | -2,43275  | 0,0149846  | 0,0714683  | no  |
| AN4273 | ChrII_A_nidulans_FGSC_A4:1550123-1552395 | WT_5hasex | WT_veg | OK | 92,8408 | 191,794 | 1,04672   | -2,11448  | 0,0344744  | 0,135159   | no  |
| AN4274 | ChrII_A_nidulans_FGSC_A4:1545578-1549162 | WT_5hasex | WT_veg | OK | 26,19   | 38,1857 | 0,544017  | -1,10548  | 0,268951   | 0,540774   | no  |
| AN4275 | ChrII_A_nidulans_FGSC_A4:1540820-1541379 | WT_5hasex | WT_veg | OK | 11,253  | 26,2636 | 1,22275   | -1,6031   | 0,108912   | 0,307385   | no  |
| AN4276 | ChrII_A_nidulans_FGSC_A4:1536846-1539557 | WT_5hasex | WT_veg | OK | 32,7589 | 24,243  | -0,434316 | 0,872628  | 0,382866   | 0,656768   | no  |
| AN4277 | ChrII_A_nidulans_FGSC_A4:1533873-1536067 | WT_5hasex | WT_veg | OK | 4,8081  | 48,3204 | 3,32909   | -4,713    | 2,441E-06  | 4,0892E-05 | yes |
| AN4278 | ChrII_A_nidulans_FGSC_A4:1526930-1533440 | WT_5hasex | WT_veg | OK | 18,2746 | 41,5731 | 1,18581   | -2,44154  | 0,0146247  | 0,0701475  | no  |
| AN4280 | ChrII_A_nidulans_FGSC_A4:1522721-1523855 | WT_5hasex | WT_veg | OK | 130,313 | 184,801 | 0,503993  | -1,03982  | 0,298424   | 0,573787   | no  |

## Supplementary table 1

|        |                                           |           |        |        |          |         |               |               |            |            |     |
|--------|-------------------------------------------|-----------|--------|--------|----------|---------|---------------|---------------|------------|------------|-----|
| AN4282 | ChrII_A_nidulans_FGSC_A4:1516452-1519995  | WT_5hasex | WT_veg | OK     | 146,734  | 239,125 | 0,704563      | -1,31886      | 0,187215   | 0,43668    | no  |
| AN4283 | ChrII_A_nidulans_FGSC_A4:1514521-1516257  | WT_5hasex | WT_veg | OK     | 45,9568  | 35,992  | -0,352603     | 0,704539      | 0,481097   | 0,735941   | no  |
| AN4284 | ChrII_A_nidulans_FGSC_A4:1513155-1514214  | WT_5hasex | WT_veg | OK     | 29,5249  | 41,9078 | 0,505285      | -0,934771     | 0,349906   | 0,62541    | no  |
| AN4285 | ChrII_A_nidulans_FGSC_A4:1509478-1512531  | WT_5hasex | WT_veg | OK     | 6,58639  | 10,2358 | 0,636067      | -1,06234      | 0,28808    | 0,562506   | no  |
| AN4286 | ChrII_A_nidulans_FGSC_A4:1505984-1509087  | WT_5hasex | WT_veg | OK     | 7,47221  | 10,1874 | 0,447185      | -0,769301     | 0,441715   | 0,705779   | no  |
| AN4287 | ChrII_A_nidulans_FGSC_A4:1503513-1505180  | WT_5hasex | WT_veg | OK     | 29,9212  | 30,5134 | 0,0282768     | -0,0557196    | 0,955565   | 0,983512   | no  |
| AN4288 | ChrII_A_nidulans_FGSC_A4:1499875-1502651  | WT_5hasex | WT_veg | OK     | 192,878  | 430,742 | 1,15914       | -2,2276       | 0,0259073  | 0,108478   | no  |
| AN4289 | ChrII_A_nidulans_FGSC_A4:1466654-1471364  | WT_5hasex | WT_veg | OK     | 14,4686  | 33,7528 | 1,22208       | -2,52174      | 0,0116777  | 0,0588796  | no  |
| AN4290 | ChrIII_A_nidulans_FGSC_A4:2483349-2484927 | WT_5hasex | WT_veg | OK     | 61,7606  | 165,755 | 1,4243        | -2,95084      | 0,00316915 | 0,0204574  | yes |
| AN4291 | ChrIII_A_nidulans_FGSC_A4:2482058-2482638 | WT_5hasex | WT_veg | OK     | 26,9212  | 64,8087 | 1,26745       | -2,08163      | 0,0373762  | 0,143479   | no  |
| AN4292 | ChrIII_A_nidulans_FGSC_A4:2480269-2481154 | WT_5hasex | WT_veg | OK     | 372,3    | 710,069 | 0,931494      | -1,87208      | 0,0611957  | 0,204985   | no  |
| AN4294 | ChrIII_A_nidulans_FGSC_A4:2473923-2475274 | WT_5hasex | WT_veg | OK     | 71,8956  | 96,5597 | 0,425518      | -0,855442     | 0,392307   | 0,665684   | no  |
| AN4295 | ChrIII_A_nidulans_FGSC_A4:2468946-2470105 | WT_5hasex | WT_veg | OK     | 515,124  | 2114,49 | 2,03732       | -3,19141      | 0,00141581 | 0,0104613  | yes |
| AN4297 | ChrIII_A_nidulans_FGSC_A4:2467714-2468625 | WT_5hasex | WT_veg | OK     | 341,047  | 767,053 | 1,16935       | -2,35092      | 0,0187273  | 0,0846207  | no  |
| AN4298 | ChrIII_A_nidulans_FGSC_A4:2465054-2467233 | WT_5hasex | WT_veg | OK     | 18,366   | 163,311 | 3,15251       | -6,20089      | 5,6145E-10 | 2,0763E-08 | yes |
| AN4299 | ChrIII_A_nidulans_FGSC_A4:2462754-2463509 | WT_5hasex | WT_veg | OK     | 2368,66  | 9510,63 | 2,00547       | -3,05967      | 0,00221583 | 0,015218   | yes |
| AN4300 | ChrIII_A_nidulans_FGSC_A4:2461665-2462499 | WT_5hasex | WT_veg | OK     | 302,449  | 535,04  | 0,822953      | -1,67819      | 0,0933099  | 0,275829   | no  |
| AN4301 | ChrIII_A_nidulans_FGSC_A4:2460368-2461213 | WT_5hasex | WT_veg | OK     | 109,778  | 231,221 | 1,07469       | -2,20077      | 0,0277523  | 0,114159   | no  |
| AN4302 | ChrIII_A_nidulans_FGSC_A4:2455785-2456892 | WT_5hasex | WT_veg | OK     | 38,1939  | 24,0372 | -0,668073     | 1,26092       | 0,207337   | 0,464509   | no  |
| AN4303 | ChrIII_A_nidulans_FGSC_A4:2452746-2455082 | WT_5hasex | WT_veg | OK     | 66,5598  | 51,8639 | -0,359921     | 0,722443      | 0,470022   | 0,728025   | no  |
| AN4304 | ChrIII_A_nidulans_FGSC_A4:2452746-2455082 | WT_5hasex | WT_veg | OK     | 141,97   | 237,405 | 0,741764      | -1,50145      | 0,133239   | 0,351136   | no  |
| AN4305 | ChrIII_A_nidulans_FGSC_A4:2451750-2452479 | WT_5hasex | WT_veg | OK     | 40,6769  | 107,607 | 1,40349       | -2,63885      | 0,0083187  | 0,0449584  | yes |
| AN4306 | ChrIII_A_nidulans_FGSC_A4:2447572-2449792 | WT_5hasex | WT_veg | OK     | 18,227   | 19,8657 | 0,124204      | -0,245568     | 0,806017   | 0,922223   | no  |
| AN4307 | ChrIII_A_nidulans_FGSC_A4:2445634-2446243 | WT_5hasex | WT_veg | OK     | 80,2006  | 126,577 | 0,658327      | -1,28554      | 0,198605   | 0,45255    | no  |
| AN4308 | ChrIII_A_nidulans_FGSC_A4:2444412-2445456 | WT_5hasex | WT_veg | OK     | 114,271  | 344,019 | 1,59003       | -3,24149      | 0,00118907 | 0,00906056 | yes |
| AN4309 | ChrIII_A_nidulans_FGSC_A4:2443091-2443893 | WT_5hasex | WT_veg | OK     | 52,7866  | 153,893 | 1,54368       | -2,8851       | 0,0039129  | 0,0243491  | yes |
| AN4310 | ChrIII_A_nidulans_FGSC_A4:2439045-2442605 | WT_5hasex | WT_veg | OK     | 50,6552  | 86,7167 | 0,775601      | -1,58164      | 0,113732   | 0,316107   | no  |
| AN4311 | ChrIII_A_nidulans_FGSC_A4:2435787-2437029 | WT_5hasex | WT_veg | OK     | 28,9573  | 90,8665 | 1,64982       | -3,23854      | 0,00120143 | 0,00912936 | yes |
| AN4312 | ChrIII_A_nidulans_FGSC_A4:2431271-2433778 | WT_5hasex | WT_veg | OK     | 60,2204  | 113,089 | 0,909138      | -1,90752      | 0,056453   | 0,193438   | no  |
| AN4313 | ChrIII_A_nidulans_FGSC_A4:2427350-2429258 | WT_5hasex | WT_veg | OK     | 15,0469  | 134,165 | 3,15647       | -5,89529      | 3,7403E-09 | 1,18E-07   | yes |
| AN4314 | ChrIII_A_nidulans_FGSC_A4:2423232-2426414 | WT_5hasex | WT_veg | OK     | 23,6509  | 75,3885 | 1,67245       | -3,36747      | 0,00075862 | 0,00619983 | yes |
| AN4315 | ChrIII_A_nidulans_FGSC_A4:2417109-2419870 | WT_5hasex | WT_veg | OK     | 82,1299  | 158,02  | 0,944125      | -1,92794      | 0,0538627  | 0,18702    | no  |
| AN4316 | ChrIII_A_nidulans_FGSC_A4:2415411-2417062 | WT_5hasex | WT_veg | OK     | 16,6747  | 15,018  | -0,150965     | 0,273309      | 0,784615   | 0,912305   | no  |
| AN4318 | ChrIII_A_nidulans_FGSC_A4:2409732-2411180 | WT_5hasex | WT_veg | OK     | 26,2629  | 35,287  | 0,42611       | -0,813449     | 0,415961   | 0,68495    | no  |
| AN4319 | ChrIII_A_nidulans_FGSC_A4:2408342-2409054 | WT_5hasex | WT_veg | OK     | 4,86757  | 13,1319 | 1,4318        | -1,8012       | 0,0716716  | 0,229288   | no  |
| AN4320 | ChrIII_A_nidulans_FGSC_A4:2405584-2407576 | WT_5hasex | WT_veg | OK     | 21,6035  | 26,6718 | 0,304046      | -0,59085      | 0,554621   | 0,784921   | no  |
| AN4322 | ChrIII_A_nidulans_FGSC_A4:2397073-2399834 | WT_5hasex | WT_veg | OK     | 12,3513  | 15,0178 | 0,282015      | -0,545964     | 0,585091   | 0,804321   | no  |
| AN4323 | ChrIII_A_nidulans_FGSC_A4:2394594-2396585 | WT_5hasex | WT_veg | OK     | 125,58   | 99,2333 | -0,339709     | 0,601784      | 0,547318   | 0,78055    | no  |
| AN4324 | ChrIII_A_nidulans_FGSC_A4:2387354-2388252 | WT_5hasex | WT_veg | OK     | 90,94    | 325,837 | 1,84116       | -3,4172       | 0,0006327  | 0,00532093 | yes |
| AN4325 | ChrIII_A_nidulans_FGSC_A4:2383901-2385235 | WT_5hasex | WT_veg | NOTEST | 0,810257 | 3,16005 | 1,9635        | -1,2845       | 0,198968   | 1          | no  |
| AN4328 | ChrIII_A_nidulans_FGSC_A4:2373032-2375437 | WT_5hasex | WT_veg | OK     | 47,3576  | 47,5219 | 0,00499408    | -0,0102147    | 0,99185    | 0,997159   | no  |
| AN4329 | ChrIII_A_nidulans_FGSC_A4:2370612-2371223 | WT_5hasex | WT_veg | OK     | 152,593  | 227,799 | 0,578073      | -1,14326      | 0,252931   | 0,522011   | no  |
| AN4330 | ChrIII_A_nidulans_FGSC_A4:2368143-2370432 | WT_5hasex | WT_veg | OK     | 11,5139  | 80,8642 | 2,81213       | -5,21758      | 1,8128E-07 | 3,9745E-06 | yes |
| AN4331 | ChrIII_A_nidulans_FGSC_A4:2366581-2367977 | WT_5hasex | WT_veg | OK     | 10,8937  | 14,0624 | 0,368343      | -0,618485     | 0,536256   | 0,773255   | no  |
| AN4333 | ChrIII_A_nidulans_FGSC_A4:2362429-2363627 | WT_5hasex | WT_veg | OK     | 16,9837  | 16,8727 | -0,00945424   | 0,016387      | 0,986926   | 0,9953     | no  |
| AN4335 | ChrIII_A_nidulans_FGSC_A4:2354788-2356222 | WT_5hasex | WT_veg | OK     | 16,2562  | 36,5465 | 1,16874       | -2,04147      | 0,0412043  | 0,154096   | no  |
| AN4337 | ChrIII_A_nidulans_FGSC_A4:2349938-2351080 | WT_5hasex | WT_veg | NOTEST | 0,434954 | 0       | -1.79769e+308 | -1.79769e+308 | 0,224063   | 1          | no  |
| AN4338 | ChrIII_A_nidulans_FGSC_A4:2347730-2348632 | WT_5hasex | WT_veg | OK     | 11,9713  | 49,7634 | 2,0555        | -2,74738      | 0,00600727 | 0,0345319  | yes |
| AN4339 | ChrIII_A_nidulans_FGSC_A4:2342874-2345262 | WT_5hasex | WT_veg | OK     | 8,55913  | 34,4852 | 2,01044       | -3,25861      | 0,0011196  | 0,00862653 | yes |
| AN4340 | ChrIII_A_nidulans_FGSC_A4:2341606-2342476 | WT_5hasex | WT_veg | OK     | 187,186  | 785,191 | 2,06857       | -4,30573      | 1,6643E-05 | 0,00022772 | yes |
| AN4341 | ChrIII_A_nidulans_FGSC_A4:2340404-2341478 | WT_5hasex | WT_veg | OK     | 21,9876  | 51,2315 | 1,22034       | -2,20921      | 0,0271602  | 0,112315   | no  |
| AN4342 | ChrIII_A_nidulans_FGSC_A4:2339355-2340081 | WT_5hasex | WT_veg | OK     | 27,832   | 73,5617 | 1,40221       | -2,43         | 0,0150987  | 0,0719015  | no  |
| AN4343 | ChrIII_A_nidulans_FGSC_A4:2336505-2338423 | WT_5hasex | WT_veg | OK     | 1,44223  | 5,89708 | 2,0317        | -2,49869      | 0,0124653  | 0,0620033  | no  |

## Supplementary table 1

|        |                                           |           |        |        |          |         |              |              |            |            |     |
|--------|-------------------------------------------|-----------|--------|--------|----------|---------|--------------|--------------|------------|------------|-----|
| AN4345 | ChrIII_A_nidulans_FGSC_A4:2329874-2331916 | WT_5hasex | WT_veg | OK     | 2,2532   | 8,69351 | 1,94797      | -2,60515     | 0,00918352 | 0,0486936  | yes |
| AN4346 | ChrIII_A_nidulans_FGSC_A4:2327994-2329454 | WT_5hasex | WT_veg | OK     | 22,1597  | 117,709 | 2,40921      | -4,48076     | 7,4378E-06 | 0,00011054 | yes |
| AN4347 | ChrIII_A_nidulans_FGSC_A4:2327161-2327842 | WT_5hasex | WT_veg | OK     | 47,2678  | 82,1937 | 0,798169     | -1,45474     | 0,145742   | 0,372181   | no  |
| AN4348 | ChrIII_A_nidulans_FGSC_A4:2324821-2325664 | WT_5hasex | WT_veg | OK     | 12,5924  | 26,0368 | 1,048        | -1,65075     | 0,098789   | 0,286848   | no  |
| AN4349 | ChrIII_A_nidulans_FGSC_A4:2318877-2322407 | WT_5hasex | WT_veg | OK     | 10,28    | 16,113  | 0,648387     | -1,23188     | 0,217996   | 0,478508   | no  |
| AN4352 | ChrIII_A_nidulans_FGSC_A4:2305263-2306923 | WT_5hasex | WT_veg | OK     | 56,2791  | 51,8497 | -0,118263    | 0,235231     | 0,814029   | 0,925469   | no  |
| AN4353 | ChrIII_A_nidulans_FGSC_A4:2302404-2303936 | WT_5hasex | WT_veg | OK     | 20,6363  | 35,7683 | 0,793498     | -1,45719     | 0,145065   | 0,371031   | no  |
| AN4354 | ChrIII_A_nidulans_FGSC_A4:2300307-2301206 | WT_5hasex | WT_veg | OK     | 5,75157  | 10,7989 | 0,908854     | -1,21127     | 0,225791   | 0,488471   | no  |
| AN4355 | ChrIII_A_nidulans_FGSC_A4:2297774-2298724 | WT_5hasex | WT_veg | OK     | 16,2956  | 37,2779 | 1,19384      | -2,00554     | 0,0449054  | 0,164302   | no  |
| AN4357 | ChrIII_A_nidulans_FGSC_A4:2292531-2293815 | WT_5hasex | WT_veg | OK     | 4,59593  | 2,80887 | -0,710368    | 0,769063     | 0,441856   | 0,705846   | no  |
| AN4358 | ChrIII_A_nidulans_FGSC_A4:2288013-2289314 | WT_5hasex | WT_veg | OK     | 30,8431  | 27,1184 | -0,18568     | 0,348626     | 0,72737    | 0,884313   | no  |
| AN4359 | ChrIII_A_nidulans_FGSC_A4:2286047-2287609 | WT_5hasex | WT_veg | OK     | 18,9955  | 59,6398 | 1,65062      | -3,03381     | 0,00241487 | 0,0163409  | yes |
| AN4360 | ChrIII_A_nidulans_FGSC_A4:2284207-2285701 | WT_5hasex | WT_veg | OK     | 15,3267  | 25,2091 | 0,717896     | -1,28467     | 0,198906   | 0,452894   | no  |
| AN4362 | ChrIII_A_nidulans_FGSC_A4:2279702-2280892 | WT_5hasex | WT_veg | OK     | 6,22141  | 6,29091 | 0,0160281    | -0,0216056   | 0,982763   | 0,993894   | no  |
| AN4363 | ChrIII_A_nidulans_FGSC_A4:2276036-2277642 | WT_5hasex | WT_veg | NOTEST | 1,80678  | 1,4253  | -0,342153    | 0,365689     | 0,714597   | 1          | no  |
| AN4364 | ChrIII_A_nidulans_FGSC_A4:2273269-2274538 | WT_5hasex | WT_veg | OK     | 22,5232  | 39,6848 | 0,81717      | -1,50123     | 0,133297   | 0,351218   | no  |
| AN4365 | ChrIII_A_nidulans_FGSC_A4:2269133-2272345 | WT_5hasex | WT_veg | OK     | 20,3698  | 51,6957 | 1,34361      | -2,71458     | 0,00663597 | 0,0375244  | yes |
| AN4366 | ChrIII_A_nidulans_FGSC_A4:2264425-2265589 | WT_5hasex | WT_veg | OK     | 2,21142  | 5,39643 | 1,28703      | -1,55267     | 0,120501   | 0,32852    | no  |
| AN4368 | ChrIII_A_nidulans_FGSC_A4:2250674-2251332 | WT_5hasex | WT_veg | OK     | 5,3658   | 8,12069 | 0,597809     | -0,735308    | 0,462152   | 0,721825   | no  |
| AN4369 | ChrIII_A_nidulans_FGSC_A4:2245065-2248611 | WT_5hasex | WT_veg | OK     | 30,3351  | 28,1184 | -0,109477    | 0,229084     | 0,818804   | 0,92747    | no  |
| AN4371 | ChrIII_A_nidulans_FGSC_A4:2239309-2240467 | WT_5hasex | WT_veg | OK     | 4,45498  | 7,4975  | 0,75099      | -1,04888     | 0,294235   | 0,56899    | no  |
| AN4373 | ChrIII_A_nidulans_FGSC_A4:2232265-2233623 | WT_5hasex | WT_veg | NOTEST | 1,34955  | 2,76328 | 1,03391      | -1,07701     | 0,281477   | 1          | no  |
| AN4374 | ChrIII_A_nidulans_FGSC_A4:2228802-2230641 | WT_5hasex | WT_veg | OK     | 9,66753  | 26,1375 | 1,4349       | -2,4286      | 0,0151572  | 0,0720788  | no  |
| AN4375 | ChrIII_A_nidulans_FGSC_A4:2225001-2226207 | WT_5hasex | WT_veg | OK     | 12,5148  | 20,3666 | 0,702573     | -1,16761     | 0,242965   | 0,509987   | no  |
| AN4377 | ChrIII_A_nidulans_FGSC_A4:2214043-2217230 | WT_5hasex | WT_veg | OK     | 14,9092  | 25,2872 | 0,762201     | -1,51855     | 0,128875   | 0,343418   | no  |
| AN4378 | ChrIII_A_nidulans_FGSC_A4:2209661-2212518 | WT_5hasex | WT_veg | OK     | 5,15617  | 6,73436 | 0,38524      | -0,635215    | 0,525288   | 0,766638   | no  |
| AN4379 | ChrIII_A_nidulans_FGSC_A4:2207554-2208915 | WT_5hasex | WT_veg | OK     | 762,273  | 2389,84 | 1,64853      | -2,79324     | 0,00521836 | 0,0307803  | yes |
| AN4380 | ChrIII_A_nidulans_FGSC_A4:2203510-2206162 | WT_5hasex | WT_veg | OK     | 69,7729  | 159,915 | 1,19657      | -2,46798     | 0,0135877  | 0,0662529  | no  |
| AN4381 | ChrIII_A_nidulans_FGSC_A4:2202016-2202823 | WT_5hasex | WT_veg | OK     | 285,177  | 568,504 | 0,995312     | -2,04646     | 0,0407115  | 0,152754   | no  |
| AN4382 | ChrIII_A_nidulans_FGSC_A4:2200594-2201395 | WT_5hasex | WT_veg | OK     | 84,5697  | 134,397 | 0,668291     | -1,30512     | 0,191852   | 0,443091   | no  |
| AN4383 | ChrIII_A_nidulans_FGSC_A4:2198279-2199755 | WT_5hasex | WT_veg | OK     | 16,4444  | 40,7095 | 1,30777      | -2,36497     | 0,0180314  | 0,0822638  | no  |
| AN4384 | ChrIII_A_nidulans_FGSC_A4:2196512-2197760 | WT_5hasex | WT_veg | OK     | 37,7934  | 41,8643 | 0,147586     | -0,293109    | 0,769439   | 0,905419   | no  |
| AN4386 | ChrIII_A_nidulans_FGSC_A4:2188396-2190664 | WT_5hasex | WT_veg | OK     | 21,6712  | 65,2287 | 1,58973      | -3,2041      | 0,00135486 | 0,0100995  | yes |
| AN4387 | ChrIII_A_nidulans_FGSC_A4:2184500-2185802 | WT_5hasex | WT_veg | OK     | 37,0173  | 67,4266 | 0,865119     | -1,72348     | 0,0848011  | 0,258312   | no  |
| AN4388 | ChrIII_A_nidulans_FGSC_A4:2182828-2183701 | WT_5hasex | WT_veg | OK     | 528,982  | 651,948 | 0,301538     | -0,603833    | 0,545955   | 0,779595   | no  |
| AN4389 | ChrIII_A_nidulans_FGSC_A4:2181081-2182457 | WT_5hasex | WT_veg | OK     | 20,1421  | 52,4682 | 1,38123      | -2,52022     | 0,0117282  | 0,0590659  | no  |
| AN4391 | ChrIII_A_nidulans_FGSC_A4:2174007-2175672 | WT_5hasex | WT_veg | OK     | 13,752   | 23,2512 | 0,757668     | -1,37894     | 0,167914   | 0,407589   | no  |
| AN4392 | ChrIII_A_nidulans_FGSC_A4:2171174-2172513 | WT_5hasex | WT_veg | OK     | 0,636518 | 23,7142 | 5,21941      | -3,86233     | 0,00011231 | 0,00121493 | yes |
| AN4393 | ChrIII_A_nidulans_FGSC_A4:2168894-2169565 | WT_5hasex | WT_veg | NOTEST | 0        | 2,5978  | 1.79769e+308 | 1.79769e+308 | 0,0716995  | 1          | no  |
| AN4394 | ChrIII_A_nidulans_FGSC_A4:2165982-2167145 | WT_5hasex | WT_veg | OK     | 66,1166  | 143,457 | 1,11753      | -1,94487     | 0,0517903  | 0,181934   | no  |
| AN4395 | ChrIII_A_nidulans_FGSC_A4:2162288-2164824 | WT_5hasex | WT_veg | OK     | 120,983  | 243,437 | 1,00874      | -2,01922     | 0,0434643  | 0,160362   | no  |
| AN4396 | ChrIII_A_nidulans_FGSC_A4:2161248-2161990 | WT_5hasex | WT_veg | OK     | 65,5967  | 201,498 | 1,61907      | -2,99261     | 0,00276599 | 0,0182641  | yes |
| AN4398 | ChrIII_A_nidulans_FGSC_A4:2156794-2159124 | WT_5hasex | WT_veg | OK     | 29,1856  | 85,538  | 1,55131      | -3,18514     | 0,00144683 | 0,0106559  | yes |
| AN4399 | ChrIII_A_nidulans_FGSC_A4:2155137-2156209 | WT_5hasex | WT_veg | OK     | 77,1164  | 124,125 | 0,686689     | -1,39421     | 0,163255   | 0,400136   | no  |
| AN4401 | ChrIII_A_nidulans_FGSC_A4:2151537-2154300 | WT_5hasex | WT_veg | OK     | 102,491  | 220,295 | 1,10394      | -2,19654     | 0,0280535  | 0,115172   | no  |
| AN4402 | ChrIII_A_nidulans_FGSC_A4:2149507-2151088 | WT_5hasex | WT_veg | OK     | 804,641  | 1314,84 | 0,70847      | -1,27802     | 0,201243   | 0,45634    | no  |
| AN4403 | ChrIII_A_nidulans_FGSC_A4:2148254-2149336 | WT_5hasex | WT_veg | OK     | 36,3333  | 89,6914 | 1,30368      | -2,5609      | 0,0104402  | 0,0539004  | no  |
| AN4404 | ChrIII_A_nidulans_FGSC_A4:2145888-2147677 | WT_5hasex | WT_veg | OK     | 135,611  | 294,928 | 1,12089      | -2,28374     | 0,022387   | 0,0969602  | no  |
| AN4405 | ChrIII_A_nidulans_FGSC_A4:2144061-2145715 | WT_5hasex | WT_veg | OK     | 28,6455  | 36,3796 | 0,344821     | -0,690289    | 0,490012   | 0,742643   | no  |
| AN4406 | ChrIII_A_nidulans_FGSC_A4:2142026-2143394 | WT_5hasex | WT_veg | OK     | 91,6434  | 278,892 | 1,6056       | -3,18737     | 0,00143572 | 0,0105845  | yes |
| AN4408 | ChrIII_A_nidulans_FGSC_A4:2133722-2136839 | WT_5hasex | WT_veg | OK     | 67,4419  | 120,796 | 0,840854     | -1,68188     | 0,0925922  | 0,274475   | no  |
| AN4410 | ChrIII_A_nidulans_FGSC_A4:2130474-2131493 | WT_5hasex | WT_veg | OK     | 14,9248  | 20,5693 | 0,462778     | -0,77503     | 0,438322   | 0,702962   | no  |
| AN4411 | ChrIII_A_nidulans_FGSC_A4:2128393-2129641 | WT_5hasex | WT_veg | OK     | 57,8436  | 174,67  | 1,59441      | -3,2732      | 0,00106339 | 0,00825902 | yes |

## Supplementary table 1

|        |                                           |           |        |        |          |          |            |           |            |            |     |
|--------|-------------------------------------------|-----------|--------|--------|----------|----------|------------|-----------|------------|------------|-----|
| AN4414 | ChrIII_A_nidulans_FGSC_A4:2117487-2118807 | WT_5hasex | WT_veg | OK     | 60,5351  | 59,4146  | -0,0269526 | 0,054932  | 0,956193   | 0,983752   | no  |
| AN4415 | ChrIII_A_nidulans_FGSC_A4:2116382-2117249 | WT_5hasex | WT_veg | OK     | 50,1702  | 78,3459  | 0,643026   | -1,22477  | 0,220663   | 0,482157   | no  |
| AN4416 | ChrIII_A_nidulans_FGSC_A4:2115193-2116081 | WT_5hasex | WT_veg | OK     | 130,386  | 302,535  | 1,21431    | -2,51844  | 0,0117876  | 0,0592966  | no  |
| AN4418 | ChrIII_A_nidulans_FGSC_A4:2109585-2111762 | WT_5hasex | WT_veg | OK     | 21,4217  | 42,4948  | 0,988215   | -1,93975  | 0,0524102  | 0,183373   | no  |
| AN4419 | ChrIII_A_nidulans_FGSC_A4:2103279-2104525 | WT_5hasex | WT_veg | OK     | 17,7431  | 19,965   | 0,170213   | -0,293757 | 0,768943   | 0,905213   | no  |
| AN4421 | ChrIII_A_nidulans_FGSC_A4:2094138-2095518 | WT_5hasex | WT_veg | OK     | 11,9975  | 49,5125  | 2,04505    | -3,35662  | 0,00078902 | 0,00641715 | yes |
| AN4422 | ChrIII_A_nidulans_FGSC_A4:2092233-2094009 | WT_5hasex | WT_veg | OK     | 91,685   | 104,632  | 0,190567   | -0,375101 | 0,707585   | 0,873678   | no  |
| AN4423 | ChrIII_A_nidulans_FGSC_A4:2089605-2090826 | WT_5hasex | WT_veg | OK     | 185,157  | 556,794  | 1,58839    | -2,92719  | 0,00342042 | 0,0218422  | yes |
| AN4424 | ChrIII_A_nidulans_FGSC_A4:2085260-2086972 | WT_5hasex | WT_veg | OK     | 11,9197  | 33,7005  | 1,49942    | -2,53846  | 0,0111341  | 0,0566894  | no  |
| AN4425 | ChrIII_A_nidulans_FGSC_A4:2082987-2084155 | WT_5hasex | WT_veg | OK     | 32,7403  | 61,1043  | 0,900205   | -1,70899  | 0,0874531  | 0,263909   | no  |
| AN4426 | ChrIII_A_nidulans_FGSC_A4:2081186-2082055 | WT_5hasex | WT_veg | OK     | 3,73452  | 16,1025  | 2,10829    | -2,73568  | 0,00622516 | 0,0355972  | yes |
| AN4427 | ChrIII_A_nidulans_FGSC_A4:2078792-2080528 | WT_5hasex | WT_veg | OK     | 6,4865   | 14,3598  | 1,14653    | -1,72467  | 0,0845863  | 0,257868   | no  |
| AN4428 | ChrIII_A_nidulans_FGSC_A4:2076085-2078154 | WT_5hasex | WT_veg | OK     | 18,9304  | 26,9814  | 0,511263   | -0,968025 | 0,333032   | 0,609426   | no  |
| AN4429 | ChrIII_A_nidulans_FGSC_A4:2072786-2075547 | WT_5hasex | WT_veg | NOTEST | 1,96013  | 3,56723  | 0,863853   | -1,16659  | 0,243374   | 1          | no  |
| AN4430 | ChrIII_A_nidulans_FGSC_A4:2070866-2071944 | WT_5hasex | WT_veg | OK     | 152,357  | 306,697  | 1,00936    | -1,96241  | 0,0497148  | 0,176836   | no  |
| AN4431 | ChrIII_A_nidulans_FGSC_A4:2068158-2070366 | WT_5hasex | WT_veg | OK     | 18,5167  | 51,5933  | 1,47836    | -2,82497  | 0,00472843 | 0,028451   | yes |
| AN4433 | ChrIII_A_nidulans_FGSC_A4:2063346-2065921 | WT_5hasex | WT_veg | OK     | 12,0106  | 25,3964  | 1,08031    | -2,04585  | 0,0407714  | 0,152891   | no  |
| AN4434 | ChrIII_A_nidulans_FGSC_A4:2061897-2063020 | WT_5hasex | WT_veg | OK     | 65,3019  | 125,535  | 0,942889   | -1,90125  | 0,0572689  | 0,195381   | no  |
| AN4435 | ChrIII_A_nidulans_FGSC_A4:2058007-2061137 | WT_5hasex | WT_veg | OK     | 10,4132  | 13,5202  | 0,376695   | -0,70305  | 0,482025   | 0,73676    | no  |
| AN4438 | ChrIII_A_nidulans_FGSC_A4:2045360-2047529 | WT_5hasex | WT_veg | OK     | 418,658  | 252,456  | -0,729739  | 1,27828   | 0,20115    | 0,456261   | no  |
| AN4439 | ChrIII_A_nidulans_FGSC_A4:2043214-2044072 | WT_5hasex | WT_veg | OK     | 50,4605  | 58,2703  | 0,207609   | -0,407348 | 0,683752   | 0,860739   | no  |
| AN4440 | ChrIII_A_nidulans_FGSC_A4:2042539-2043038 | WT_5hasex | WT_veg | OK     | 51,3782  | 55,3999  | 0,108729   | -0,190158 | 0,849185   | 0,940762   | no  |
| AN4441 | ChrIII_A_nidulans_FGSC_A4:2040964-2042133 | WT_5hasex | WT_veg | OK     | 83,0584  | 111,716  | 0,427641   | -0,874184 | 0,382018   | 0,656065   | no  |
| AN4444 | ChrIII_A_nidulans_FGSC_A4:2026507-2030212 | WT_5hasex | WT_veg | NOTEST | 0,964539 | 0,811826 | -0,248669  | 0,207479  | 0,835636   | 1          | no  |
| AN4445 | ChrIII_A_nidulans_FGSC_A4:2026507-2030212 | WT_5hasex | WT_veg | OK     | 17,8138  | 34,755   | 0,964224   | -1,80457  | 0,0711427  | 0,228115   | no  |
| AN4446 | ChrIII_A_nidulans_FGSC_A4:2025395-2026240 | WT_5hasex | WT_veg | OK     | 156,618  | 194,561  | 0,312975   | -0,643692 | 0,519775   | 0,763334   | no  |
| AN4447 | ChrIII_A_nidulans_FGSC_A4:2020672-2024074 | WT_5hasex | WT_veg | OK     | 26,0999  | 49,2744  | 0,91679    | -1,81995  | 0,0687661  | 0,222657   | no  |
| AN4448 | ChrIII_A_nidulans_FGSC_A4:2019622-2020366 | WT_5hasex | WT_veg | NOTEST | 0        | 0        | 0          | 0         | 1          | 1          | no  |
| AN4449 | ChrIII_A_nidulans_FGSC_A4:2018535-2019333 | WT_5hasex | WT_veg | OK     | 194,046  | 255,276  | 0,395662   | -0,8201   | 0,412159   | 0,68191    | no  |
| AN4450 | ChrIII_A_nidulans_FGSC_A4:2016548-2018281 | WT_5hasex | WT_veg | OK     | 20,2294  | 22,6366  | 0,162205   | -0,314494 | 0,753146   | 0,897356   | no  |
| AN4451 | ChrIII_A_nidulans_FGSC_A4:2013635-2014244 | WT_5hasex | WT_veg | NOTEST | 1,20534  | 2,70311  | 1,16518    | -0,663027 | 0,507313   | 1          | no  |
| AN4452 | ChrIII_A_nidulans_FGSC_A4:2010348-2013297 | WT_5hasex | WT_veg | OK     | 236,189  | 311,468  | 0,399144   | -0,768175 | 0,442383   | 0,706266   | no  |
| AN4453 | ChrIII_A_nidulans_FGSC_A4:2006103-2009537 | WT_5hasex | WT_veg | OK     | 42,1474  | 74,123   | 0,814477   | -1,68869  | 0,0912785  | 0,271494   | no  |
| AN4454 | ChrIII_A_nidulans_FGSC_A4:2004497-2005577 | WT_5hasex | WT_veg | OK     | 11,0827  | 17,1795  | 0,63237    | -1,02101  | 0,307251   | 0,583231   | no  |
| AN4455 | ChrIII_A_nidulans_FGSC_A4:2000365-2001996 | WT_5hasex | WT_veg | OK     | 28,0433  | 90,9143  | 1,69685    | -3,34188  | 0,00083214 | 0,00671479 | yes |
| AN4456 | ChrIII_A_nidulans_FGSC_A4:1997829-1999819 | WT_5hasex | WT_veg | OK     | 9,21943  | 65,5419  | 2,82967    | -4,87197  | 1,1049E-06 | 2,0048E-05 | yes |
| AN4457 | ChrIII_A_nidulans_FGSC_A4:1996587-1997623 | WT_5hasex | WT_veg | OK     | 262,536  | 389,384  | 0,568676   | -1,14972  | 0,250261   | 0,518756   | no  |
| AN4458 | ChrIII_A_nidulans_FGSC_A4:1994476-1996384 | WT_5hasex | WT_veg | OK     | 24,791   | 36,8358  | 0,571292   | -1,14819  | 0,250891   | 0,519528   | no  |
| AN4459 | ChrIII_A_nidulans_FGSC_A4:1991982-1994337 | WT_5hasex | WT_veg | OK     | 21,8305  | 21,6418  | -0,0125252 | 0,0251449 | 0,979939   | 0,993015   | no  |
| AN4460 | ChrIII_A_nidulans_FGSC_A4:1988087-1991130 | WT_5hasex | WT_veg | OK     | 12,5744  | 44,5341  | 1,82442    | -3,55017  | 0,00038498 | 0,0034776  | yes |
| AN4461 | ChrIII_A_nidulans_FGSC_A4:1986167-1987836 | WT_5hasex | WT_veg | OK     | 28,8428  | 99,9409  | 1,79286    | -3,61922  | 0,00029549 | 0,00278598 | yes |
| AN4463 | ChrIII_A_nidulans_FGSC_A4:1974727-1980206 | WT_5hasex | WT_veg | OK     | 81,6114  | 145,71   | 0,836257   | -1,58672  | 0,112576   | 0,313891   | no  |
| AN4465 | ChrIII_A_nidulans_FGSC_A4:1969287-1970416 | WT_5hasex | WT_veg | OK     | 28,3132  | 48,3779  | 0,772871   | -1,44872  | 0,147415   | 0,374965   | no  |
| AN4468 | ChrIII_A_nidulans_FGSC_A4:1958310-1959063 | WT_5hasex | WT_veg | OK     | 173,197  | 531,223  | 1,61691    | -3,36343  | 0,00076981 | 0,00627756 | yes |
| AN4469 | ChrIII_A_nidulans_FGSC_A4:1956657-1958206 | WT_5hasex | WT_veg | OK     | 14,5208  | 58,2378  | 2,00383    | -3,4933   | 0,00047709 | 0,00418418 | yes |
| AN4470 | ChrIII_A_nidulans_FGSC_A4:1943421-1945203 | WT_5hasex | WT_veg | OK     | 111,656  | 228,87   | 1,03547    | -2,12302  | 0,033752   | 0,132973   | no  |
| AN4471 | ChrIII_A_nidulans_FGSC_A4:1941383-1942999 | WT_5hasex | WT_veg | OK     | 25,9958  | 130,479  | 2,32746    | -4,36694  | 0,0000126  | 0,00017635 | yes |
| AN4472 | ChrIII_A_nidulans_FGSC_A4:1936028-1940754 | WT_5hasex | WT_veg | OK     | 13,7178  | 35,5434  | 1,37354    | -2,83886  | 0,00452755 | 0,0274693  | yes |
| AN4473 | ChrIII_A_nidulans_FGSC_A4:1933570-1935352 | WT_5hasex | WT_veg | OK     | 11,8169  | 16,8043  | 0,507987   | -0,878818 | 0,3795     | 0,654002   | no  |
| AN4474 | ChrIII_A_nidulans_FGSC_A4:1931690-1932533 | WT_5hasex | WT_veg | OK     | 27,3209  | 51,3626  | 0,910714   | -1,60839  | 0,10775    | 0,305157   | no  |
| AN4475 | ChrIII_A_nidulans_FGSC_A4:1930287-1931347 | WT_5hasex | WT_veg | OK     | 1663,7   | 2776,28  | 0,738762   | -1,2035   | 0,228782   | 0,491884   | no  |
| AN4477 | ChrIII_A_nidulans_FGSC_A4:1924842-1927197 | WT_5hasex | WT_veg | OK     | 35,3293  | 33,0338  | -0,0969221 | 0,200258  | 0,841279   | 0,937216   | no  |
| AN4478 | ChrIII_A_nidulans_FGSC_A4:1919581-1923647 | WT_5hasex | WT_veg | OK     | 24,1902  | 69,6868  | 1,52646    | -3,17432  | 0,00150186 | 0,0110055  | yes |

## Supplementary table 1

|        |                                           |           |        |        |          |          |               |               |            |            |     |
|--------|-------------------------------------------|-----------|--------|--------|----------|----------|---------------|---------------|------------|------------|-----|
| AN4480 | ChrIII_A_nidulans_FGSC_A4:1910505-1912359 | WT_5hasex | WT_veg | OK     | 22,1734  | 13,8643  | -0,67746      | 1,30693       | 0,191235   | 0,442238   | no  |
| AN4481 | ChrIII_A_nidulans_FGSC_A4:1908172-1909880 | WT_5hasex | WT_veg | OK     | 43,084   | 42,0852  | -0,0338383    | 0,0616887     | 0,950811   | 0,981924   | no  |
| AN4482 | ChrIII_A_nidulans_FGSC_A4:1903001-1905046 | WT_5hasex | WT_veg | OK     | 23,1186  | 28,3941  | 0,296538      | -0,586974     | 0,557221   | 0,786976   | no  |
| AN4483 | ChrIII_A_nidulans_FGSC_A4:1899385-1902182 | WT_5hasex | WT_veg | OK     | 401,672  | 1887,16  | 2,23213       | -3,61517      | 0,00030015 | 0,0028207  | yes |
| AN4484 | ChrIII_A_nidulans_FGSC_A4:1894862-1897472 | WT_5hasex | WT_veg | OK     | 12,9347  | 36,056   | 1,47899       | -2,78638      | 0,00532999 | 0,0313014  | yes |
| AN4485 | ChrIII_A_nidulans_FGSC_A4:1891510-1893360 | WT_5hasex | WT_veg | NOTEST | 0,38196  | 0,792651 | 1,05326       | -0,709822     | 0,477815   | 1          | no  |
| AN4487 | ChrIII_A_nidulans_FGSC_A4:1885265-1887714 | WT_5hasex | WT_veg | OK     | 7,54699  | 11,5839  | 0,618141      | -1,07778      | 0,281132   | 0,554769   | no  |
| AN4488 | ChrIII_A_nidulans_FGSC_A4:1881903-1884932 | WT_5hasex | WT_veg | OK     | 18,3686  | 23,4561  | 0,352721      | -0,696027     | 0,486412   | 0,740267   | no  |
| AN4489 | ChrIII_A_nidulans_FGSC_A4:1878500-1880864 | WT_5hasex | WT_veg | OK     | 11,8117  | 14,9679  | 0,341664      | -0,628874     | 0,529431   | 0,769136   | no  |
| AN4490 | ChrIII_A_nidulans_FGSC_A4:1876074-1878215 | WT_5hasex | WT_veg | OK     | 86,3196  | 199,566  | 1,20911       | -2,48336      | 0,013015   | 0,0641245  | no  |
| AN4491 | ChrIII_A_nidulans_FGSC_A4:1874626-1875541 | WT_5hasex | WT_veg | OK     | 26,102   | 65,1109  | 1,31874       | -2,39838      | 0,0164676  | 0,0768556  | no  |
| AN4492 | ChrIII_A_nidulans_FGSC_A4:1872975-1874457 | WT_5hasex | WT_veg | OK     | 214,934  | 289,514  | 0,42974       | -0,861885     | 0,388751   | 0,662095   | no  |
| AN4494 | ChrIII_A_nidulans_FGSC_A4:1868297-1869765 | WT_5hasex | WT_veg | OK     | 1004,59  | 1776,33  | 0,822301      | -1,43228      | 0,152064   | 0,382547   | no  |
| AN4495 | ChrIII_A_nidulans_FGSC_A4:1866462-1868169 | WT_5hasex | WT_veg | OK     | 15,5591  | 23,2797  | 0,581309      | -1,08124      | 0,279592   | 0,55319    | no  |
| AN4496 | ChrIII_A_nidulans_FGSC_A4:1862765-1865954 | WT_5hasex | WT_veg | OK     | 12,528   | 40,7438  | 1,70142       | -3,32371      | 0,00088827 | 0,00711406 | yes |
| AN4497 | ChrIII_A_nidulans_FGSC_A4:1857053-1860407 | WT_5hasex | WT_veg | OK     | 7,35727  | 10,5977  | 0,526509      | -0,977846     | 0,32815    | 0,604505   | no  |
| AN4498 | ChrIII_A_nidulans_FGSC_A4:1854125-1856017 | WT_5hasex | WT_veg | OK     | 44,404   | 73,0521  | 0,718238      | -1,4885       | 0,136619   | 0,356881   | no  |
| AN4500 | ChrIII_A_nidulans_FGSC_A4:1850406-1851392 | WT_5hasex | WT_veg | OK     | 3253,69  | 7397,87  | 1,18503       | -1,7332       | 0,0830604  | 0,254504   | no  |
| AN4502 | ChrIII_A_nidulans_FGSC_A4:1843630-1845090 | WT_5hasex | WT_veg | OK     | 64,146   | 149,598  | 1,22166       | -2,57032      | 0,0101605  | 0,0527366  | no  |
| AN4503 | ChrIII_A_nidulans_FGSC_A4:1838683-1839431 | WT_5hasex | WT_veg | OK     | 84,3512  | 54,0136  | -0,643087     | 1,25005       | 0,211281   | 0,46987    | no  |
| AN4505 | ChrIII_A_nidulans_FGSC_A4:1834174-1835203 | WT_5hasex | WT_veg | OK     | 65,9474  | 87,9738  | 0,415759      | -0,846195     | 0,397444   | 0,670364   | no  |
| AN4506 | ChrIII_A_nidulans_FGSC_A4:1832310-1833100 | WT_5hasex | WT_veg | NOTEST | 0,251351 | 0        | -1.79769e+308 | -1.79769e+308 | 0,165569   | 1          | no  |
| AN4509 | ChrIII_A_nidulans_FGSC_A4:1823870-1826591 | WT_5hasex | WT_veg | OK     | 8,70968  | 21,7921  | 1,32311       | -2,43762      | 0,0147841  | 0,070757   | no  |
| AN4510 | ChrIII_A_nidulans_FGSC_A4:1818862-1821687 | WT_5hasex | WT_veg | OK     | 15,9098  | 29,0703  | 0,869631      | -1,67402      | 0,0941276  | 0,277433   | no  |
| AN4511 | ChrIII_A_nidulans_FGSC_A4:1816533-1817202 | WT_5hasex | WT_veg | OK     | 18,4735  | 21,9751  | 0,250413      | -0,389907     | 0,696605   | 0,867266   | no  |
| AN4512 | ChrIII_A_nidulans_FGSC_A4:1815711-1816324 | WT_5hasex | WT_veg | OK     | 48,5054  | 98,4379  | 1,02107       | -1,88329      | 0,0596606  | 0,201444   | no  |
| AN4517 | ChrIII_A_nidulans_FGSC_A4:1795888-1799358 | WT_5hasex | WT_veg | OK     | 128,216  | 159,896  | 0,318554      | -0,608674     | 0,54274    | 0,777565   | no  |
| AN4518 | ChrIII_A_nidulans_FGSC_A4:1789727-1793997 | WT_5hasex | WT_veg | OK     | 20,5755  | 14,0766  | -0,547627     | 1,12678       | 0,259837   | 0,530208   | no  |
| AN4519 | ChrIII_A_nidulans_FGSC_A4:1787518-1789393 | WT_5hasex | WT_veg | OK     | 10,5495  | 16,0849  | 0,608543      | -1,08994      | 0,27574    | 0,548861   | no  |
| AN4520 | ChrIII_A_nidulans_FGSC_A4:1785520-1787301 | WT_5hasex | WT_veg | OK     | 22,5339  | 37,315   | 0,72766       | -1,43818      | 0,150383   | 0,379536   | no  |
| AN4522 | ChrIII_A_nidulans_FGSC_A4:1776374-1777224 | WT_5hasex | WT_veg | OK     | 1500,67  | 2977,25  | 0,988374      | -1,76387      | 0,077754   | 0,24299    | no  |
| AN4524 | ChrIII_A_nidulans_FGSC_A4:1762577-1763704 | WT_5hasex | WT_veg | OK     | 63,7799  | 107,343  | 0,751059      | -1,55055      | 0,12101    | 0,329481   | no  |
| AN4525 | ChrIII_A_nidulans_FGSC_A4:1760527-1762004 | WT_5hasex | WT_veg | OK     | 1499,24  | 1389,54  | -0,109627     | 0,182537      | 0,855162   | 0,943414   | no  |
| AN4527 | ChrIII_A_nidulans_FGSC_A4:1755765-1756998 | WT_5hasex | WT_veg | OK     | 24,5724  | 67,2073  | 1,45158       | -2,25651      | 0,0240384  | 0,102354   | no  |
| AN4528 | ChrIII_A_nidulans_FGSC_A4:1752326-1753819 | WT_5hasex | WT_veg | OK     | 81,6604  | 76,4832  | -0,0944935    | 0,191994      | 0,847747   | 0,940063   | no  |
| AN4529 | ChrIII_A_nidulans_FGSC_A4:1748318-1749551 | WT_5hasex | WT_veg | OK     | 6,33825  | 19,13    | 1,59368       | -2,25984      | 0,023831   | 0,101677   | no  |
| AN4530 | ChrIII_A_nidulans_FGSC_A4:1745992-1747307 | WT_5hasex | WT_veg | OK     | 25,3563  | 42,3684  | 0,740644      | -1,40314      | 0,160574   | 0,396196   | no  |
| AN4531 | ChrIII_A_nidulans_FGSC_A4:1742405-1744588 | WT_5hasex | WT_veg | OK     | 10,3649  | 19,14    | 0,884886      | -1,52787      | 0,126546   | 0,339056   | no  |
| AN4532 | ChrIII_A_nidulans_FGSC_A4:1741023-1742161 | WT_5hasex | WT_veg | OK     | 15,4149  | 31,399   | 1,02639       | -1,71471      | 0,0863978  | 0,261776   | no  |
| AN4534 | ChrIII_A_nidulans_FGSC_A4:1734776-1735769 | WT_5hasex | WT_veg | OK     | 6,6475   | 16,9631  | 1,35152       | -1,86755      | 0,061825   | 0,206405   | no  |
| AN4535 | ChrIII_A_nidulans_FGSC_A4:1731864-1734612 | WT_5hasex | WT_veg | OK     | 71,1664  | 38,4317  | -0,8889       | 1,81329       | 0,0697864  | 0,224974   | no  |
| AN4536 | ChrIII_A_nidulans_FGSC_A4:1726031-1729963 | WT_5hasex | WT_veg | OK     | 43,2942  | 87,8684  | 1,02117       | -2,1288       | 0,0332708  | 0,131433   | no  |
| AN4537 | ChrIII_A_nidulans_FGSC_A4:1722481-1725067 | WT_5hasex | WT_veg | OK     | 27,2245  | 44,7831  | 0,718049      | -1,35654      | 0,174926   | 0,418886   | no  |
| AN4538 | ChrIII_A_nidulans_FGSC_A4:1720400-1721926 | WT_5hasex | WT_veg | OK     | 37,2743  | 90,8268  | 1,28494       | -2,60021      | 0,00931655 | 0,0492143  | yes |
| AN4539 | ChrIII_A_nidulans_FGSC_A4:1718665-1719913 | WT_5hasex | WT_veg | OK     | 519,939  | 469,693  | -0,146626     | 0,269123      | 0,787835   | 0,913415   | no  |
| AN4540 | ChrIII_A_nidulans_FGSC_A4:1716960-1718389 | WT_5hasex | WT_veg | OK     | 10,5143  | 38,879   | 1,88663       | -3,02633      | 0,00247545 | 0,0166671  | yes |
| AN4541 | ChrIII_A_nidulans_FGSC_A4:1715413-1716748 | WT_5hasex | WT_veg | OK     | 62,1503  | 113,649  | 0,870755      | -1,80142      | 0,0716371  | 0,22922    | no  |
| AN4542 | ChrIII_A_nidulans_FGSC_A4:1711100-1713473 | WT_5hasex | WT_veg | OK     | 171,378  | 248,616  | 0,536736      | -1,07064      | 0,28433    | 0,558199   | no  |
| AN4543 | ChrIII_A_nidulans_FGSC_A4:1709117-1710309 | WT_5hasex | WT_veg | OK     | 33,8545  | 64,3079  | 0,925649      | -1,78873      | 0,0736583  | 0,233582   | no  |
| AN4544 | ChrIII_A_nidulans_FGSC_A4:1706426-1708533 | WT_5hasex | WT_veg | OK     | 37,0302  | 77,769   | 1,07049       | -2,16559      | 0,0303427  | 0,122375   | no  |
| AN4545 | ChrIII_A_nidulans_FGSC_A4:1698702-1701653 | WT_5hasex | WT_veg | OK     | 8,45202  | 15,6586  | 0,889584      | -1,65044      | 0,0988529  | 0,28699    | no  |
| AN4546 | ChrIII_A_nidulans_FGSC_A4:1695638-1696782 | WT_5hasex | WT_veg | OK     | 50,8395  | 75,3195  | 0,567074      | -1,14905      | 0,250536   | 0,519017   | no  |
| AN4547 | ChrIII_A_nidulans_FGSC_A4:1690949-1694127 | WT_5hasex | WT_veg | OK     | 74,9762  | 98,1519  | 0,388584      | -0,779571     | 0,435644   | 0,700952   | no  |



## Supplementary table 1

|        |                                           |           |        |        |          |          |               |               |            |            |      |
|--------|-------------------------------------------|-----------|--------|--------|----------|----------|---------------|---------------|------------|------------|------|
| AN4548 | ChrIII_A_nidulans_FGSC_A4:1689255-1690392 | WT_5hasex | WT_veg | OK     | 29,5495  | 104,353  | 1,82027       | -3,44358      | 0,00057406 | 0,0049001  | yes  |
| AN4549 | ChrIII_A_nidulans_FGSC_A4:1687706-1688999 | WT_5hasex | WT_veg | OK     | 45,4571  | 159,977  | 1,81529       | -3,69532      | 0,00021961 | 0,00215866 | yes  |
| AN4553 | ChrIII_A_nidulans_FGSC_A4:1678373-1679079 | WT_5hasex | WT_veg | OK     | 48,1729  | 35,7629  | -0,429759     | 0,739883      | 0,459371   | 0,719683   | no   |
| AN4554 | ChrIII_A_nidulans_FGSC_A4:1676992-1677922 | WT_5hasex | WT_veg | NOTEST | 0,192809 | 0,898949 | 2,22106       | -1,14626      | 0,251686   |            | 1 no |
| AN4555 | ChrIII_A_nidulans_FGSC_A4:1673985-1676185 | WT_5hasex | WT_veg | OK     | 9,28419  | 8,48731  | -0,129469     | 0,221624      | 0,824607   | 0,93005    | no   |
| AN4556 | ChrIII_A_nidulans_FGSC_A4:1672366-1673577 | WT_5hasex | WT_veg | OK     | 47,1011  | 62,381   | 0,405346      | -0,787501     | 0,430989   | 0,697531   | no   |
| AN4557 | ChrIII_A_nidulans_FGSC_A4:1668942-1672108 | WT_5hasex | WT_veg | OK     | 95,5363  | 145,855  | 0,610412      | -1,18704      | 0,235211   | 0,500469   | no   |
| AN4558 | ChrIII_A_nidulans_FGSC_A4:1665276-1668275 | WT_5hasex | WT_veg | OK     | 27,3305  | 64,3016  | 1,23435       | -2,52612      | 0,011533   | 0,0583295  | no   |
| AN4559 | ChrIII_A_nidulans_FGSC_A4:1663506-1664288 | WT_5hasex | WT_veg | OK     | 161,313  | 843,732  | 2,38692       | -4,88662      | 1,0258E-06 | 1,8756E-05 | yes  |
| AN4560 | ChrIII_A_nidulans_FGSC_A4:1662413-1663292 | WT_5hasex | WT_veg | OK     | 83,5733  | 478,866  | 2,51851       | -4,87574      | 1,084E-06  | 1,971E-05  | yes  |
| AN4563 | ChrIII_A_nidulans_FGSC_A4:1656240-1659007 | WT_5hasex | WT_veg | OK     | 654,103  | 738,437  | 0,174956      | -0,290362     | 0,77154    | 0,906304   | no   |
| AN4565 | ChrIII_A_nidulans_FGSC_A4:1646799-1647475 | WT_5hasex | WT_veg | OK     | 42,9785  | 49,3449  | 0,199285      | -0,367633     | 0,713147   | 0,876672   | no   |
| AN4567 | ChrIII_A_nidulans_FGSC_A4:1639714-1641259 | WT_5hasex | WT_veg | OK     | 5,16946  | 8,41402  | 0,702782      | -1,00689      | 0,313987   | 0,59005    | no   |
| AN4569 | ChrIII_A_nidulans_FGSC_A4:1636433-1637272 | WT_5hasex | WT_veg | OK     | 153,402  | 223,252  | 0,541355      | -1,06745      | 0,285768   | 0,559953   | no   |
| AN4570 | ChrIII_A_nidulans_FGSC_A4:1633916-1635900 | WT_5hasex | WT_veg | OK     | 54,2176  | 191,726  | 1,82221       | -3,78278      | 0,00015509 | 0,00159944 | yes  |
| AN4571 | ChrIII_A_nidulans_FGSC_A4:1629583-1633373 | WT_5hasex | WT_veg | OK     | 10,0195  | 18,5897  | 0,891693      | -1,70328      | 0,0885154  | 0,266023   | no   |
| AN4572 | ChrIII_A_nidulans_FGSC_A4:1628072-1629220 | WT_5hasex | WT_veg | OK     | 18,8089  | 28,0069  | 0,574368      | -1,03035      | 0,302846   | 0,578681   | no   |
| AN4573 | ChrIII_A_nidulans_FGSC_A4:1626459-1627518 | WT_5hasex | WT_veg | NOTEST | 0,216592 | 0,182757 | -0,245056     | 0,0691616     | 0,944861   |            | 1 no |
| AN4574 | ChrIII_A_nidulans_FGSC_A4:1624288-1625824 | WT_5hasex | WT_veg | OK     | 31,7192  | 49,5638  | 0,643931      | -1,25388      | 0,209884   | 0,467895   | no   |
| AN4575 | ChrIII_A_nidulans_FGSC_A4:1621937-1623256 | WT_5hasex | WT_veg | OK     | 2894,05  | 5775,92  | 0,996959      | -1,19864      | 0,230666   | 0,494569   | no   |
| AN4576 | ChrIII_A_nidulans_FGSC_A4:1620036-1621451 | WT_5hasex | WT_veg | OK     | 6,36824  | 8,14124  | 0,354355      | -0,532911     | 0,594095   | 0,809416   | no   |
| AN4579 | ChrIII_A_nidulans_FGSC_A4:1614484-1616537 | WT_5hasex | WT_veg | OK     | 36,7123  | 58,2431  | 0,665822      | -1,35204      | 0,176363   | 0,420932   | no   |
| AN4580 | ChrIII_A_nidulans_FGSC_A4:1613756-1614212 | WT_5hasex | WT_veg | OK     | 42,632   | 43,6331  | 0,0334879     | -0,0550352    | 0,95611    | 0,983708   | no   |
| AN4581 | ChrIII_A_nidulans_FGSC_A4:1610967-1613554 | WT_5hasex | WT_veg | OK     | 8,49388  | 45,0252  | 2,40624       | -4,32272      | 1,5412E-05 | 0,00021241 | yes  |
| AN4582 | ChrIII_A_nidulans_FGSC_A4:1609286-1610740 | WT_5hasex | WT_veg | OK     | 9,75907  | 5,46718  | -0,835946     | 1,29258       | 0,196157   | 0,449045   | no   |
| AN4584 | ChrIII_A_nidulans_FGSC_A4:1606290-1606908 | WT_5hasex | WT_veg | OK     | 20,1085  | 25,3048  | 0,331605      | -0,497354     | 0,61894    | 0,823932   | no   |
| AN4585 | ChrIII_A_nidulans_FGSC_A4:1603378-1605574 | WT_5hasex | WT_veg | OK     | 29,4219  | 51,3774  | 0,804242      | -1,64163      | 0,100668   | 0,290915   | no   |
| AN4586 | ChrIII_A_nidulans_FGSC_A4:1600634-1601769 | WT_5hasex | WT_veg | OK     | 35,07    | 951,177  | 4,76222       | -9,08863      | 0          | 0          | yes  |
| AN4587 | ChrIII_A_nidulans_FGSC_A4:1599419-1600597 | WT_5hasex | WT_veg | OK     | 11,4622  | 31,2872  | 1,44869       | -2,09027      | 0,0365935  | 0,141216   | no   |
| AN4588 | ChrIII_A_nidulans_FGSC_A4:1596266-1596984 | WT_5hasex | WT_veg | OK     | 1,02708  | 8,59726  | 3,06533       | -2,84022      | 0,00450818 | 0,0273868  | yes  |
| AN4589 | ChrIII_A_nidulans_FGSC_A4:1594388-1595204 | WT_5hasex | WT_veg | OK     | 278,376  | 371,181  | 0,415089      | -0,843232     | 0,399099   | 0,671455   | no   |
| AN4590 | ChrIII_A_nidulans_FGSC_A4:1592007-1593996 | WT_5hasex | WT_veg | OK     | 3,669    | 7,43943  | 1,01981       | -1,33551      | 0,181711   | 0,428648   | no   |
| AN4591 | ChrIII_A_nidulans_FGSC_A4:1583647-1586000 | WT_5hasex | WT_veg | OK     | 132,122  | 124,969  | -0,0803009    | 0,162537      | 0,870883   | 0,95057    | no   |
| AN4592 | ChrIII_A_nidulans_FGSC_A4:1581601-1583407 | WT_5hasex | WT_veg | OK     | 89,7618  | 50,2335  | -0,837451     | 1,73634       | 0,082503   | 0,253265   | no   |
| AN4593 | ChrIII_A_nidulans_FGSC_A4:1579072-1581133 | WT_5hasex | WT_veg | OK     | 15,6615  | 19,7715  | 0,336202      | -0,642606     | 0,52048    | 0,763872   | no   |
| AN4594 | ChrIII_A_nidulans_FGSC_A4:1577718-1578571 | WT_5hasex | WT_veg | OK     | 1100,6   | 1309,78  | 0,251031      | -0,432741     | 0,665203   | 0,850451   | no   |
| AN4597 | ChrIII_A_nidulans_FGSC_A4:1569303-1573812 | WT_5hasex | WT_veg | OK     | 28,2832  | 51,0191  | 0,851094      | -1,75904      | 0,0785705  | 0,244696   | no   |
| AN4598 | ChrIII_A_nidulans_FGSC_A4:1565860-1567885 | WT_5hasex | WT_veg | OK     | 32,5686  | 46,73    | 0,520865      | -1,02158      | 0,306982   | 0,583011   | no   |
| AN4599 | ChrIII_A_nidulans_FGSC_A4:1559647-1562318 | WT_5hasex | WT_veg | OK     | 18,1202  | 37,9237  | 1,0655        | -2,10846      | 0,0349914  | 0,136511   | no   |
| AN4600 | ChrIII_A_nidulans_FGSC_A4:1558224-1559452 | WT_5hasex | WT_veg | OK     | 14,4893  | 50,1306  | 1,7907        | -3,06065      | 0,0022086  | 0,0151804  | yes  |
| AN4601 | ChrIII_A_nidulans_FGSC_A4:1552276-1556927 | WT_5hasex | WT_veg | OK     | 30,5796  | 54,2975  | 0,828318      | -1,64501      | 0,0999683  | 0,289246   | no   |
| AN4602 | ChrIII_A_nidulans_FGSC_A4:1551300-1552018 | WT_5hasex | WT_veg | OK     | 34,9761  | 33,6585  | -0,0553986    | 0,0968134     | 0,922875   | 0,970809   | no   |
| AN4603 | ChrIII_A_nidulans_FGSC_A4:1547721-1549469 | WT_5hasex | WT_veg | OK     | 63,1826  | 133,889  | 1,08344       | -2,04357      | 0,0409962  | 0,153482   | no   |
| AN4604 | ChrIII_A_nidulans_FGSC_A4:1544065-1545377 | WT_5hasex | WT_veg | NOTEST | 2,12329  | 1,8339   | -0,21139      | 0,206783      | 0,836179   |            | 1 no |
| AN4605 | ChrIII_A_nidulans_FGSC_A4:1542618-1543285 | WT_5hasex | WT_veg | NOTEST | 1,51857  | 0        | -1.79769e+308 | -1.79769e+308 | 0,0399057  |            | 1 no |
| AN4606 | ChrIII_A_nidulans_FGSC_A4:1540496-1541690 | WT_5hasex | WT_veg | OK     | 2,46392  | 18,1143  | 2,8781        | -3,19788      | 0,00138441 | 0,0102698  | yes  |
| AN4607 | ChrIII_A_nidulans_FGSC_A4:1539290-1539788 | WT_5hasex | WT_veg | OK     | 2,58957  | 7,19994  | 1,47527       | -1,56059      | 0,11862    | 0,325201   | no   |
| AN4608 | ChrIII_A_nidulans_FGSC_A4:1537644-1538868 | WT_5hasex | WT_veg | OK     | 40,8932  | 87,3587  | 1,09509       | -2,08552      | 0,0370217  | 0,142459   | no   |
| AN4609 | ChrIII_A_nidulans_FGSC_A4:1530733-1535527 | WT_5hasex | WT_veg | OK     | 3,61102  | 8,39015  | 1,21629       | -1,88907      | 0,058883   | 0,199521   | no   |
| AN4610 | ChrIII_A_nidulans_FGSC_A4:1529299-1530093 | WT_5hasex | WT_veg | NOTEST | 1,1428   | 3,74778  | 1,71346       | -1,36502      | 0,172247   |            | 1 no |
| AN4611 | ChrIII_A_nidulans_FGSC_A4:1527991-1528488 | WT_5hasex | WT_veg | OK     | 142,409  | 385,67   | 1,43733       | -2,84385      | 0,00445719 | 0,0271462  | yes  |
| AN4612 | ChrIII_A_nidulans_FGSC_A4:1525919-1526576 | WT_5hasex | WT_veg | OK     | 44,5157  | 104,71   | 1,23401       | -2,29972      | 0,0214641  | 0,0940517  | no   |
| AN4613 | ChrIII_A_nidulans_FGSC_A4:1522766-1525497 | WT_5hasex | WT_veg | OK     | 20,69    | 95,508   | 2,20669       | -4,41394      | 1,0151E-05 | 0,00014589 | yes  |

## Supplementary table 1

|        |                                           |           |        |        |          |          |               |               |            |            |     |
|--------|-------------------------------------------|-----------|--------|--------|----------|----------|---------------|---------------|------------|------------|-----|
| AN4614 | ChrIII_A_nidulans_FGSC_A4:1521182-1522585 | WT_5hasex | WT_veg | OK     | 90,3319  | 278,257  | 1,62311       | -3,32665      | 0,00087897 | 0,00704492 | yes |
| AN4616 | ChrIII_A_nidulans_FGSC_A4:1517013-1519189 | WT_5hasex | WT_veg | OK     | 49,6095  | 187,932  | 1,92152       | -3,82064      | 0,0001331  | 0,00140936 | yes |
| AN4617 | ChrIII_A_nidulans_FGSC_A4:1515788-1516610 | WT_5hasex | WT_veg | OK     | 30,4444  | 63,8657  | 1,06887       | -1,95947      | 0,0500583  | 0,177696   | no  |
| AN4618 | ChrIII_A_nidulans_FGSC_A4:1513355-1515590 | WT_5hasex | WT_veg | OK     | 3,77022  | 34,59    | 3,19763       | -5,0455       | 4,5233E-07 | 9,0539E-06 | yes |
| AN4619 | ChrIII_A_nidulans_FGSC_A4:1510735-1511666 | WT_5hasex | WT_veg | NOTEST | 0,429769 | 0,256032 | -0,747241     | 0,233956      | 0,815019   | 1          | no  |
| AN4620 | ChrIII_A_nidulans_FGSC_A4:1507004-1508591 | WT_5hasex | WT_veg | NOTEST | 0        | 0        | 0             | 0             | 1          | 1          | no  |
| AN4621 | ChrIII_A_nidulans_FGSC_A4:1503543-1505357 | WT_5hasex | WT_veg | OK     | 1,22738  | 3,9421   | 1,68338       | -1,80218      | 0,0715174  | 0,228925   | no  |
| AN4622 | ChrIII_A_nidulans_FGSC_A4:1498736-1500091 | WT_5hasex | WT_veg | OK     | 77,9857  | 235,143  | 1,59226       | -3,33622      | 0,00084925 | 0,00683919 | yes |
| AN4623 | ChrIII_A_nidulans_FGSC_A4:1493286-1497948 | WT_5hasex | WT_veg | OK     | 21,5426  | 14,1815  | -0,603178     | 1,21985       | 0,222523   | 0,484227   | no  |
| AN4625 | ChrIII_A_nidulans_FGSC_A4:1488630-1489800 | WT_5hasex | WT_veg | OK     | 3,63804  | 6,16221  | 0,760287      | -0,887565     | 0,374775   | 0,649503   | no  |
| AN4626 | ChrIII_A_nidulans_FGSC_A4:1485901-1487305 | WT_5hasex | WT_veg | OK     | 2,58451  | 2,74432  | 0,0865531     | -0,101002     | 0,919549   | 0,969327   | no  |
| AN4627 | ChrIII_A_nidulans_FGSC_A4:1484618-1485199 | WT_5hasex | WT_veg | NOTEST | 0,475492 | 2,67981  | 2,49464       | -1,17985      | 0,238059   | 1          | no  |
| AN4628 | ChrIII_A_nidulans_FGSC_A4:1479328-1483420 | WT_5hasex | WT_veg | NOTEST | 0,494101 | 0        | -1.79769e+308 | -1.79769e+308 | 0,0665159  | 1          | no  |
| AN4629 | ChrIII_A_nidulans_FGSC_A4:1479328-1483420 | WT_5hasex | WT_veg | NOTEST | 0,857195 | 0        | -1.79769e+308 | -1.79769e+308 | 0,113927   | 1          | no  |
| AN4630 | ChrIII_A_nidulans_FGSC_A4:1476617-1478271 | WT_5hasex | WT_veg | NOTEST | 0,703691 | 2,70123  | 1,9406        | -1,87         | 0,0614831  | 1          | no  |
| AN4631 | ChrIII_A_nidulans_FGSC_A4:1475086-1476026 | WT_5hasex | WT_veg | OK     | 4,9374   | 7,83513  | 0,666208      | -0,902401     | 0,366844   | 0,641741   | no  |
| AN4632 | ChrIII_A_nidulans_FGSC_A4:1471361-1473652 | WT_5hasex | WT_veg | OK     | 52,4366  | 117,271  | 1,1612        | -2,42666      | 0,0152386  | 0,0723702  | no  |
| AN4633 | ChrIII_A_nidulans_FGSC_A4:1469815-1470578 | WT_5hasex | WT_veg | OK     | 275,262  | 338,289  | 0,297448      | -0,593678     | 0,552727   | 0,783637   | no  |
| AN4634 | ChrIII_A_nidulans_FGSC_A4:1466779-1467896 | WT_5hasex | WT_veg | OK     | 31,9934  | 26,9063  | -0,249831     | 0,472292      | 0,636718   | 0,83403    | no  |
| AN4636 | ChrIII_A_nidulans_FGSC_A4:1459478-1460473 | WT_5hasex | WT_veg | OK     | 96,3152  | 698,011  | 2,85742       | -5,54342      | 2,9662E-08 | 7,76E-07   | yes |
| AN4637 | ChrIII_A_nidulans_FGSC_A4:1456627-1459429 | WT_5hasex | WT_veg | OK     | 97,1823  | 166,119  | 0,773456      | -1,56445      | 0,117711   | 0,323405   | no  |
| AN4638 | ChrIII_A_nidulans_FGSC_A4:1452751-1455473 | WT_5hasex | WT_veg | NOTEST | 0,590122 | 3,15378  | 2,418         | -2,53735      | 0,0111694  | 1          | no  |
| AN4639 | ChrIII_A_nidulans_FGSC_A4:1447462-1452606 | WT_5hasex | WT_veg | OK     | 18,8756  | 37,612   | 0,994672      | -2,0447       | 0,040884   | 0,153138   | no  |
| AN4640 | ChrIII_A_nidulans_FGSC_A4:1442556-1444171 | WT_5hasex | WT_veg | NOTEST | 0,251286 | 0,634336 | 1,33592       | -0,735649     | 0,461945   | 1          | no  |
| AN4642 | ChrIII_A_nidulans_FGSC_A4:1428726-1430522 | WT_5hasex | WT_veg | OK     | 13,3803  | 15,2394  | 0,187698      | -0,308107     | 0,758001   | 0,900065   | no  |
| AN4644 | ChrIII_A_nidulans_FGSC_A4:1422398-1423236 | WT_5hasex | WT_veg | OK     | 7,40172  | 6,13218  | -0,271461     | 0,330549      | 0,740985   | 0,891291   | no  |
| AN4645 | ChrIII_A_nidulans_FGSC_A4:1418461-1420406 | WT_5hasex | WT_veg | OK     | 42,407   | 68,6239  | 0,694408      | -1,27341      | 0,202873   | 0,458705   | no  |
| AN4646 | ChrIII_A_nidulans_FGSC_A4:1418461-1420406 | WT_5hasex | WT_veg | OK     | 774,424  | 1712,97  | 1,14531       | -1,93374      | 0,0531457  | 0,185272   | no  |
| AN4647 | ChrIII_A_nidulans_FGSC_A4:1416989-1418055 | WT_5hasex | WT_veg | OK     | 105,575  | 135,262  | 0,357484      | -0,739802     | 0,45942    | 0,719717   | no  |
| AN4648 | ChrIII_A_nidulans_FGSC_A4:1415305-1416931 | WT_5hasex | WT_veg | OK     | 23,874   | 135,861  | 2,50862       | -4,6581       | 3,1914E-06 | 5,2018E-05 | yes |
| AN4649 | ChrIII_A_nidulans_FGSC_A4:1412695-1414500 | WT_5hasex | WT_veg | NOTEST | 1,60323  | 2,10006  | 0,389454      | -0,446753     | 0,655053   | 1          | no  |
| AN4650 | ChrIII_A_nidulans_FGSC_A4:1408297-1411454 | WT_5hasex | WT_veg | OK     | 42,6339  | 85,3168  | 1,00083       | -2,09757      | 0,0359429  | 0,139424   | no  |
| AN4652 | ChrIII_A_nidulans_FGSC_A4:1396639-1397945 | WT_5hasex | WT_veg | OK     | 99,9968  | 328,592  | 1,71634       | -3,53782      | 0,00040345 | 0,00362073 | yes |
| AN4653 | ChrIII_A_nidulans_FGSC_A4:1395333-1396572 | WT_5hasex | WT_veg | OK     | 19,3198  | 49,5225  | 1,35801       | -2,38085      | 0,0172729  | 0,0797055  | no  |
| AN4654 | ChrIII_A_nidulans_FGSC_A4:1392923-1394917 | WT_5hasex | WT_veg | OK     | 31,6424  | 505,32   | 3,99727       | -8,09202      | 6,6613E-16 | 5,5762E-14 | yes |
| AN4655 | ChrIII_A_nidulans_FGSC_A4:1391290-1392123 | WT_5hasex | WT_veg | OK     | 222,193  | 555,998  | 1,32326       | -2,70603      | 0,00680938 | 0,0383147  | yes |
| AN4656 | ChrIII_A_nidulans_FGSC_A4:1388485-1389719 | WT_5hasex | WT_veg | OK     | 12,605   | 30,0392  | 1,25285       | -2,16384      | 0,0304765  | 0,122801   | no  |
| AN4657 | ChrIII_A_nidulans_FGSC_A4:1386321-1387803 | WT_5hasex | WT_veg | OK     | 31,0509  | 53,9135  | 0,796011      | -1,52626      | 0,126945   | 0,339848   | no  |
| AN4658 | ChrIII_A_nidulans_FGSC_A4:1382889-1384183 | WT_5hasex | WT_veg | NOTEST | 0,336382 | 1,31379  | 1,96556       | -1,35972      | 0,173919   | 1          | no  |
| AN4659 | ChrIII_A_nidulans_FGSC_A4:1378750-1382365 | WT_5hasex | WT_veg | OK     | 13,9074  | 37,4663  | 1,42974       | -2,55987      | 0,010471   | 0,0540113  | no  |
| AN4660 | ChrIII_A_nidulans_FGSC_A4:1378750-1382365 | WT_5hasex | WT_veg | OK     | 29,7432  | 45,7971  | 0,622696      | -0,80944      | 0,418262   | 0,686923   | no  |
| AN4662 | ChrIII_A_nidulans_FGSC_A4:1378750-1382365 | WT_5hasex | WT_veg | OK     | 16,3717  | 46,2374  | 1,49786       | -2,18865      | 0,0286226  | 0,116877   | no  |
| AN4663 | ChrIII_A_nidulans_FGSC_A4:1376607-1378398 | WT_5hasex | WT_veg | OK     | 30,8562  | 22,8326  | -0,434465     | 0,863455      | 0,387887   | 0,661335   | no  |
| AN4665 | ChrIII_A_nidulans_FGSC_A4:1372720-1373800 | WT_5hasex | WT_veg | OK     | 29,9272  | 49,4486  | 0,724472      | -1,39253      | 0,163763   | 0,400892   | no  |
| AN4666 | ChrIII_A_nidulans_FGSC_A4:1371536-1372596 | WT_5hasex | WT_veg | OK     | 33,5396  | 49,4432  | 0,559907      | -1,0703       | 0,284486   | 0,558317   | no  |
| AN4669 | ChrIII_A_nidulans_FGSC_A4:1358903-1362382 | WT_5hasex | WT_veg | NOTEST | 0,36482  | 0        | -1.79769e+308 | -1.79769e+308 | 0,0908325  | 1          | no  |
| AN4670 | ChrIII_A_nidulans_FGSC_A4:1356009-1358376 | WT_5hasex | WT_veg | OK     | 46,5264  | 59,0614  | 0,344167      | -0,712792     | 0,475974   | 0,732204   | no  |
| AN4671 | ChrIII_A_nidulans_FGSC_A4:1354586-1355603 | WT_5hasex | WT_veg | OK     | 31,2328  | 41,3436  | 0,404601      | -0,747628     | 0,454685   | 0,715996   | no  |
| AN4672 | ChrIII_A_nidulans_FGSC_A4:1353461-1354227 | WT_5hasex | WT_veg | OK     | 9,31634  | 52,0946  | 2,4833        | -3,78146      | 0,00015591 | 0,00160605 | yes |
| AN4673 | ChrIII_A_nidulans_FGSC_A4:1351393-1352992 | WT_5hasex | WT_veg | OK     | 19,0042  | 39,4047  | 1,05205       | -1,86882      | 0,0616475  | 0,206164   | no  |
| AN4674 | ChrIII_A_nidulans_FGSC_A4:1348881-1350662 | WT_5hasex | WT_veg | OK     | 154,774  | 400,365  | 1,37116       | -2,74931      | 0,005972   | 0,0343631  | yes |
| AN4675 | ChrIII_A_nidulans_FGSC_A4:1348397-1348787 | WT_5hasex | WT_veg | OK     | 7,93894  | 25,5604  | 1,68689       | -2,07132      | 0,0383291  | 0,14618    | no  |
| AN4676 | ChrIII_A_nidulans_FGSC_A4:1342631-1344788 | WT_5hasex | WT_veg | OK     | 29,5153  | 27,3153  | -0,111754     | 0,223462      | 0,823176   | 0,929436   | no  |

## Supplementary table 1

|        |                                           |           |        |        |          |         |            |            |            |            |     |
|--------|-------------------------------------------|-----------|--------|--------|----------|---------|------------|------------|------------|------------|-----|
| AN4677 | ChrIII_A_nidulans_FGSC_A4:1339887-1340295 | WT_5hasex | WT_veg | OK     | 0,979968 | 4,19348 | 2,09734    | -0,922585  | 0,356224   | 0,631559   | no  |
| AN4678 | ChrIII_A_nidulans_FGSC_A4:1336521-1338546 | WT_5hasex | WT_veg | OK     | 9,04336  | 25,519  | 1,49664    | -2,6453    | 0,00816189 | 0,0443074  | yes |
| AN4680 | ChrIII_A_nidulans_FGSC_A4:1331199-1332626 | WT_5hasex | WT_veg | OK     | 270,408  | 189,736 | -0,511145  | 1,0165     | 0,309389   | 0,585801   | no  |
| AN4681 | ChrIII_A_nidulans_FGSC_A4:1328760-1330263 | WT_5hasex | WT_veg | OK     | 3,17173  | 1,38382 | -1,19661   | 1,21273    | 0,225231   | 0,487629   | no  |
| AN4682 | ChrIII_A_nidulans_FGSC_A4:1327741-1328198 | WT_5hasex | WT_veg | OK     | 173,856  | 257,948 | 0,569193   | -1,15456   | 0,248271   | 0,516451   | no  |
| AN4683 | ChrIII_A_nidulans_FGSC_A4:1325809-1327351 | WT_5hasex | WT_veg | OK     | 62,2458  | 43,6328 | -0,512566  | 1,04344    | 0,296745   | 0,572023   | no  |
| AN4684 | ChrIII_A_nidulans_FGSC_A4:1323173-1324626 | WT_5hasex | WT_veg | OK     | 123,472  | 399,095 | 1,69255    | -3,43634   | 0,00058963 | 0,00501503 | yes |
| AN4685 | ChrIII_A_nidulans_FGSC_A4:1320078-1321529 | WT_5hasex | WT_veg | OK     | 67,214   | 170,303 | 1,34127    | -2,71577   | 0,00661214 | 0,03743    | yes |
| AN4686 | ChrIII_A_nidulans_FGSC_A4:1317708-1318710 | WT_5hasex | WT_veg | OK     | 8,26301  | 8,51033 | 0,0425477  | -0,0584288 | 0,953407   | 0,982622   | no  |
| AN4689 | ChrIII_A_nidulans_FGSC_A4:1311848-1312957 | WT_5hasex | WT_veg | OK     | 11,7103  | 113,479 | 3,27657    | -5,45628   | 4,8621E-08 | 1,2133E-06 | yes |
| AN4691 | ChrIII_A_nidulans_FGSC_A4:1305141-1306465 | WT_5hasex | WT_veg | OK     | 8,88415  | 66,1021 | 2,89539    | -4,55056   | 5,3503E-06 | 8,2219E-05 | yes |
| AN4692 | ChrIII_A_nidulans_FGSC_A4:1299838-1302149 | WT_5hasex | WT_veg | OK     | 7,62265  | 11,7815 | 0,628156   | -1,05758   | 0,290246   | 0,564908   | no  |
| AN4694 | ChrIII_A_nidulans_FGSC_A4:1291860-1294316 | WT_5hasex | WT_veg | OK     | 20,6404  | 36,4937 | 0,822179   | -1,65185   | 0,0985645  | 0,286382   | no  |
| AN4696 | ChrIII_A_nidulans_FGSC_A4:1282366-1286373 | WT_5hasex | WT_veg | OK     | 25,7466  | 99,8393 | 1,95523    | -3,79305   | 0,00014881 | 0,00154567 | yes |
| AN4697 | ChrIII_A_nidulans_FGSC_A4:1279386-1281046 | WT_5hasex | WT_veg | OK     | 30,9778  | 39,6053 | 0,354458   | -0,669726  | 0,503032   | 0,751913   | no  |
| AN4698 | ChrIII_A_nidulans_FGSC_A4:1268326-1270591 | WT_5hasex | WT_veg | OK     | 32,6202  | 76,2769 | 1,22548    | -2,55853   | 0,0105114  | 0,0541666  | no  |
| AN4699 | ChrIII_A_nidulans_FGSC_A4:1255462-1259167 | WT_5hasex | WT_veg | OK     | 61,7822  | 164,504 | 1,41286    | -2,78924   | 0,00528316 | 0,0310868  | yes |
| AN4701 | ChrIII_A_nidulans_FGSC_A4:1249925-1250958 | WT_5hasex | WT_veg | OK     | 15,9092  | 49,3074 | 1,63194    | -2,72711   | 0,00638925 | 0,0363884  | yes |
| AN4702 | ChrIII_A_nidulans_FGSC_A4:1248043-1249094 | WT_5hasex | WT_veg | OK     | 128,609  | 306,877 | 1,25467    | -2,16294   | 0,0305459  | 0,123033   | no  |
| AN4703 | ChrIII_A_nidulans_FGSC_A4:1245665-1246610 | WT_5hasex | WT_veg | NOTEST | 0        | 0       | 0          | 0          | 1          | 1          | no  |
| AN4704 | ChrIII_A_nidulans_FGSC_A4:1241584-1242038 | WT_5hasex | WT_veg | OK     | 1,43681  | 16,8129 | 3,54862    | -3,35664   | 0,00078897 | 0,00641715 | yes |
| AN4705 | ChrIII_A_nidulans_FGSC_A4:1230843-1235303 | WT_5hasex | WT_veg | OK     | 16,1906  | 35,2296 | 1,12163    | -2,32769   | 0,0199288  | 0,088938   | no  |
| AN4706 | ChrIII_A_nidulans_FGSC_A4:1222630-1230058 | WT_5hasex | WT_veg | OK     | 18,6244  | 31,036  | 0,736746   | -1,50381   | 0,132631   | 0,349889   | no  |
| AN4707 | ChrIII_A_nidulans_FGSC_A4:1221052-1222303 | WT_5hasex | WT_veg | OK     | 37,0414  | 98,5812 | 1,41217    | -2,82157   | 0,00477886 | 0,0287025  | yes |
| AN4708 | ChrIII_A_nidulans_FGSC_A4:1219845-1220963 | WT_5hasex | WT_veg | OK     | 7,43337  | 21,5145 | 1,53322    | -2,31929   | 0,0203793  | 0,0904477  | no  |
| AN4710 | ChrIII_A_nidulans_FGSC_A4:1214967-1216514 | WT_5hasex | WT_veg | OK     | 26,5592  | 77,6681 | 1,54811    | -3,01203   | 0,00259504 | 0,017334   | yes |
| AN4711 | ChrIII_A_nidulans_FGSC_A4:1213520-1214536 | WT_5hasex | WT_veg | OK     | 187,445  | 1137,56 | 2,60141    | -5,04746   | 4,4772E-07 | 8,9744E-06 | yes |
| AN4713 | ChrIII_A_nidulans_FGSC_A4:1207402-1209204 | WT_5hasex | WT_veg | OK     | 56,6445  | 123,175 | 1,1207     | -2,24878   | 0,0245266  | 0,103816   | no  |
| AN4714 | ChrIII_A_nidulans_FGSC_A4:1205387-1207055 | WT_5hasex | WT_veg | OK     | 58,6322  | 131,79  | 1,16847    | -2,44501   | 0,0144849  | 0,0696352  | no  |
| AN4715 | ChrIII_A_nidulans_FGSC_A4:1204790-1205292 | WT_5hasex | WT_veg | OK     | 3,29538  | 31,7983 | 3,27043    | -3,79113   | 0,00014996 | 0,00155444 | yes |
| AN4716 | ChrIII_A_nidulans_FGSC_A4:1201799-1202889 | WT_5hasex | WT_veg | OK     | 33,7375  | 49,9296 | 0,565542   | -1,10395   | 0,269615   | 0,541503   | no  |
| AN4718 | ChrIII_A_nidulans_FGSC_A4:1196922-1197818 | WT_5hasex | WT_veg | OK     | 163,92   | 222,366 | 0,43994    | -0,898604  | 0,368864   | 0,64362    | no  |
| AN4719 | ChrIII_A_nidulans_FGSC_A4:1191682-1196026 | WT_5hasex | WT_veg | OK     | 34,1359  | 72,4983 | 1,08666    | -2,20962   | 0,0271312  | 0,112203   | no  |
| AN4720 | ChrIII_A_nidulans_FGSC_A4:1189852-1190915 | WT_5hasex | WT_veg | OK     | 8,50343  | 62,5721 | 2,8794     | -4,05039   | 5,1132E-05 | 0,00061035 | yes |
| AN4721 | ChrIII_A_nidulans_FGSC_A4:1183629-1187753 | WT_5hasex | WT_veg | OK     | 10,2614  | 18,7281 | 0,867973   | -1,73813   | 0,0821881  | 0,252452   | no  |
| AN4722 | ChrIII_A_nidulans_FGSC_A4:1181861-1183279 | WT_5hasex | WT_veg | OK     | 219,104  | 185,638 | -0,239127  | 0,452179   | 0,65114    | 0,842328   | no  |
| AN4723 | ChrIII_A_nidulans_FGSC_A4:1174840-1177437 | WT_5hasex | WT_veg | OK     | 11,3866  | 23,5199 | 1,04655    | -1,97125   | 0,0486949  | 0,174392   | no  |
| AN4724 | ChrIII_A_nidulans_FGSC_A4:1171878-1174438 | WT_5hasex | WT_veg | OK     | 23,0093  | 19,0461 | -0,272719  | 0,546179   | 0,584943   | 0,804244   | no  |
| AN4725 | ChrIII_A_nidulans_FGSC_A4:1170910-1171657 | WT_5hasex | WT_veg | OK     | 20,3908  | 36,7463 | 0,849683   | -1,43494   | 0,151305   | 0,381151   | no  |
| AN4726 | ChrIII_A_nidulans_FGSC_A4:1169337-1170760 | WT_5hasex | WT_veg | OK     | 51,0435  | 48,1247 | -0,0849487 | 0,173314   | 0,862405   | 0,94688    | no  |
| AN4728 | ChrIII_A_nidulans_FGSC_A4:1164031-1166915 | WT_5hasex | WT_veg | OK     | 42,8101  | 55,2775 | 0,368742   | -0,766335  | 0,443477   | 0,707258   | no  |
| AN4729 | ChrIII_A_nidulans_FGSC_A4:1162329-1163806 | WT_5hasex | WT_veg | OK     | 13,0938  | 80,4287 | 2,61882    | -4,59204   | 4,3893E-06 | 6,8782E-05 | yes |
| AN4730 | ChrIII_A_nidulans_FGSC_A4:1159992-1160736 | WT_5hasex | WT_veg | OK     | 125,18   | 202,474 | 0,693727   | -1,4187    | 0,155988   | 0,388836   | no  |
| AN4731 | ChrIII_A_nidulans_FGSC_A4:1158993-1159641 | WT_5hasex | WT_veg | OK     | 365,872  | 300,289 | -0,284989  | 0,582872   | 0,55998    | 0,788993   | no  |
| AN4732 | ChrIII_A_nidulans_FGSC_A4:1156670-1158050 | WT_5hasex | WT_veg | OK     | 89,7142  | 106,222 | 0,243678   | -0,505927  | 0,612908   | 0,820646   | no  |
| AN4733 | ChrIII_A_nidulans_FGSC_A4:1151141-1154448 | WT_5hasex | WT_veg | OK     | 33,3481  | 60,2071 | 0,85233    | -1,74176   | 0,0815505  | 0,251067   | no  |
| AN4735 | ChrIII_A_nidulans_FGSC_A4:1144946-1147887 | WT_5hasex | WT_veg | OK     | 14,2265  | 28,6229 | 1,00859    | -1,9663    | 0,0492636  | 0,175816   | no  |
| AN4736 | ChrIII_A_nidulans_FGSC_A4:1141939-1144059 | WT_5hasex | WT_veg | OK     | 22,0628  | 48,2984 | 1,13036    | -2,25969   | 0,0238403  | 0,101708   | no  |
| AN4738 | ChrIII_A_nidulans_FGSC_A4:1136532-1137868 | WT_5hasex | WT_veg | OK     | 17,2648  | 21,0693 | 0,287313   | -0,507862  | 0,61155    | 0,819732   | no  |
| AN4739 | ChrIII_A_nidulans_FGSC_A4:1133563-1135924 | WT_5hasex | WT_veg | OK     | 72,4691  | 187,766 | 1,3735     | -2,82885   | 0,00467156 | 0,0281799  | yes |
| AN4740 | ChrIII_A_nidulans_FGSC_A4:1133563-1135924 | WT_5hasex | WT_veg | OK     | 55,3891  | 268,611 | 2,27784    | -4,65134   | 3,2979E-06 | 5,3569E-05 | yes |
| AN4741 | ChrIII_A_nidulans_FGSC_A4:1127056-1132264 | WT_5hasex | WT_veg | OK     | 33,6173  | 43,882  | 0,384426   | -0,803564  | 0,421649   | 0,6897     | no  |
| AN4742 | ChrIII_A_nidulans_FGSC_A4:1122287-1123447 | WT_5hasex | WT_veg | OK     | 840,945  | 1168,07 | 0,474043   | -0,881233  | 0,378192   | 0,65275    | no  |

## Supplementary table 1

|        |                                           |           |        |        |         |         |            |            |            |            |     |
|--------|-------------------------------------------|-----------|--------|--------|---------|---------|------------|------------|------------|------------|-----|
| AN4744 | ChrIII_A_nidulans_FGSC_A4:1116880-1119567 | WT_5hasex | WT_veg | OK     | 77,4556 | 66,9997 | -0,209215  | 0,403843   | 0,686328   | 0,861994   | no  |
| AN4745 | ChrIII_A_nidulans_FGSC_A4:1113910-1116579 | WT_5hasex | WT_veg | OK     | 74,3745 | 216,097 | 1,5388     | -3,18202   | 0,0014625  | 0,0107562  | yes |
| AN4746 | ChrIII_A_nidulans_FGSC_A4:1112384-1113829 | WT_5hasex | WT_veg | OK     | 51,403  | 67,8435 | 0,400357   | -0,785062  | 0,432417   | 0,698721   | no  |
| AN4747 | ChrIII_A_nidulans_FGSC_A4:1110800-1111647 | WT_5hasex | WT_veg | OK     | 45,7334 | 41,2644 | -0,148352  | 0,271689   | 0,785861   | 0,912551   | no  |
| AN4748 | ChrIII_A_nidulans_FGSC_A4:1109329-1110610 | WT_5hasex | WT_veg | OK     | 32,9206 | 142,237 | 2,11123    | -4,17753   | 2,9469E-05 | 0,00037784 | yes |
| AN4749 | ChrIII_A_nidulans_FGSC_A4:1103723-1108661 | WT_5hasex | WT_veg | OK     | 7,74119 | 7,35255 | -0,0743104 | 0,145732   | 0,884133   | 0,955955   | no  |
| AN4750 | ChrIII_A_nidulans_FGSC_A4:1101184-1102741 | WT_5hasex | WT_veg | OK     | 24,8117 | 36,0509 | 0,539013   | -1,01524   | 0,30999    | 0,586403   | no  |
| AN4751 | ChrIII_A_nidulans_FGSC_A4:1098756-1099821 | WT_5hasex | WT_veg | OK     | 12,1233 | 63,3113 | 2,38468    | -3,7367    | 0,00018645 | 0,00187567 | yes |
| AN4752 | ChrIII_A_nidulans_FGSC_A4:1095472-1098426 | WT_5hasex | WT_veg | OK     | 7,53056 | 9,67403 | 0,36136    | -0,551208  | 0,581491   | 0,802003   | no  |
| AN4753 | ChrIII_A_nidulans_FGSC_A4:1095472-1098426 | WT_5hasex | WT_veg | OK     | 90,4555 | 93,1262 | 0,0419777  | -0,0826324 | 0,934144   | 0,975159   | no  |
| AN4754 | ChrIII_A_nidulans_FGSC_A4:1092702-1095305 | WT_5hasex | WT_veg | OK     | 31,8691 | 45,1233 | 0,501715   | -0,95109   | 0,341559   | 0,617169   | no  |
| AN4755 | ChrIII_A_nidulans_FGSC_A4:1092702-1095305 | WT_5hasex | WT_veg | OK     | 434,932 | 576,997 | 0,407776   | -0,747611  | 0,454695   | 0,715996   | no  |
| AN4757 | ChrIII_A_nidulans_FGSC_A4:1086664-1087662 | WT_5hasex | WT_veg | OK     | 114,757 | 223,272 | 0,960216   | -1,91246   | 0,055817   | 0,191862   | no  |
| AN4758 | ChrIII_A_nidulans_FGSC_A4:1085879-1086495 | WT_5hasex | WT_veg | OK     | 136,223 | 289,344 | 1,08682    | -2,19337   | 0,0282809  | 0,115834   | no  |
| AN4759 | ChrIII_A_nidulans_FGSC_A4:1082456-1084473 | WT_5hasex | WT_veg | OK     | 32,7917 | 42,0371 | 0,358332   | -0,737726  | 0,460681   | 0,720627   | no  |
| AN4760 | ChrIII_A_nidulans_FGSC_A4:1079833-1081538 | WT_5hasex | WT_veg | OK     | 22,1221 | 53,5094 | 1,27431    | -2,48924   | 0,0128015  | 0,0633152  | no  |
| AN4762 | ChrIII_A_nidulans_FGSC_A4:1074841-1075760 | WT_5hasex | WT_veg | OK     | 1383,07 | 1042,28 | -0,408138  | 0,714741   | 0,474769   | 0,731408   | no  |
| AN4763 | ChrIII_A_nidulans_FGSC_A4:1072335-1074596 | WT_5hasex | WT_veg | OK     | 58,6826 | 56,0804 | -0,0654353 | 0,135871   | 0,891923   | 0,958838   | no  |
| AN4764 | ChrIII_A_nidulans_FGSC_A4:1067509-1070140 | WT_5hasex | WT_veg | OK     | 10,2419 | 27,7831 | 1,43973    | -2,69615   | 0,00701459 | 0,039195   | yes |
| AN4766 | ChrIII_A_nidulans_FGSC_A4:1061667-1062752 | WT_5hasex | WT_veg | OK     | 25,4723 | 33,2314 | 0,383618   | -0,702443  | 0,482403   | 0,736927   | no  |
| AN4767 | ChrIII_A_nidulans_FGSC_A4:1056860-1059623 | WT_5hasex | WT_veg | OK     | 8,62877 | 12,7943 | 0,568279   | -1,03009   | 0,302967   | 0,578822   | no  |
| AN4768 | ChrIII_A_nidulans_FGSC_A4:1054805-1056787 | WT_5hasex | WT_veg | OK     | 30,9578 | 38,0647 | 0,298151   | -0,609432  | 0,542238   | 0,777156   | no  |
| AN4771 | ChrIII_A_nidulans_FGSC_A4:1037464-1039236 | WT_5hasex | WT_veg | OK     | 11,5678 | 56,369  | 2,28479    | -4,06778   | 4,7463E-05 | 0,00057163 | yes |
| AN4773 | ChrIII_A_nidulans_FGSC_A4:1030674-1032770 | WT_5hasex | WT_veg | NOTEST | 1,08435 | 1,45776 | 0,426921   | -0,403202  | 0,686799   | 1          | no  |
| AN4774 | ChrIII_A_nidulans_FGSC_A4:1027121-1028857 | WT_5hasex | WT_veg | OK     | 13,2944 | 26,2984 | 0,984157   | -1,77299   | 0,0762298  | 0,239602   | no  |
| AN4775 | ChrIII_A_nidulans_FGSC_A4:1024305-1026208 | WT_5hasex | WT_veg | OK     | 143,942 | 180,682 | 0,327967   | -0,661672  | 0,508181   | 0,755003   | no  |
| AN4776 | ChrIII_A_nidulans_FGSC_A4:1023330-1024197 | WT_5hasex | WT_veg | OK     | 24,6666 | 57,3325 | 1,2168     | -2,11448   | 0,0344746  | 0,135159   | no  |
| AN4777 | ChrIII_A_nidulans_FGSC_A4:1021542-1022425 | WT_5hasex | WT_veg | OK     | 1454,41 | 2857,34 | 0,97424    | -1,67466   | 0,0940012  | 0,277169   | no  |
| AN4778 | ChrIII_A_nidulans_FGSC_A4:1019203-1021128 | WT_5hasex | WT_veg | OK     | 49,184  | 111,589 | 1,18193    | -2,41878   | 0,0155727  | 0,0735675  | no  |
| AN4779 | ChrIII_A_nidulans_FGSC_A4:1017139-1018377 | WT_5hasex | WT_veg | OK     | 81,2339 | 103,692 | 0,352147   | -0,644705  | 0,519118   | 0,762866   | no  |
| AN4780 | ChrIII_A_nidulans_FGSC_A4:1015053-1015986 | WT_5hasex | WT_veg | OK     | 215,18  | 396,756 | 0,882707   | -1,82028   | 0,0687165  | 0,222484   | no  |
| AN4781 | ChrIII_A_nidulans_FGSC_A4:1013761-1014631 | WT_5hasex | WT_veg | OK     | 73,4557 | 196,462 | 1,41931    | -2,90842   | 0,00363257 | 0,0229342  | yes |
| AN4782 | ChrIII_A_nidulans_FGSC_A4:1012091-1013200 | WT_5hasex | WT_veg | OK     | 57,9074 | 189,273 | 1,70865    | -3,47327   | 0,00051415 | 0,00445846 | yes |
| AN4784 | ChrIII_A_nidulans_FGSC_A4:1003036-1005643 | WT_5hasex | WT_veg | OK     | 141,168 | 77,1396 | -0,871868  | 1,70999    | 0,0872672  | 0,263511   | no  |
| AN4785 | ChrIII_A_nidulans_FGSC_A4:999721-1002489  | WT_5hasex | WT_veg | OK     | 31,4192 | 48,6557 | 0,630962   | -1,30169   | 0,193023   | 0,444743   | no  |
| AN4786 | ChrIII_A_nidulans_FGSC_A4:995564-996857   | WT_5hasex | WT_veg | OK     | 30,8413 | 43,4464 | 0,494371   | -0,951408  | 0,341397   | 0,61702    | no  |
| AN4788 | ChrIII_A_nidulans_FGSC_A4:992584-993985   | WT_5hasex | WT_veg | OK     | 16,8713 | 43,7418 | 1,37444    | -2,52605   | 0,0115353  | 0,0583355  | no  |
| AN4791 | ChrIII_A_nidulans_FGSC_A4:978159-981737   | WT_5hasex | WT_veg | OK     | 7,54332 | 17,2394 | 1,19244    | -2,19533   | 0,02814    | 0,115419   | no  |
| AN4792 | ChrIII_A_nidulans_FGSC_A4:975342-977212   | WT_5hasex | WT_veg | OK     | 13,1959 | 36,2557 | 1,45812    | -2,61653   | 0,00888274 | 0,0474585  | yes |
| AN4793 | ChrIII_A_nidulans_FGSC_A4:973585-975095   | WT_5hasex | WT_veg | OK     | 162,451 | 243,648 | 0,584795   | -1,09081   | 0,275358   | 0,54842    | no  |
| AN4794 | ChrIII_A_nidulans_FGSC_A4:970078-971522   | WT_5hasex | WT_veg | OK     | 1586,14 | 2167,57 | 0,450556   | -0,723487  | 0,469381   | 0,727676   | no  |
| AN4795 | ChrIII_A_nidulans_FGSC_A4:963185-964733   | WT_5hasex | WT_veg | OK     | 32,595  | 66,5499 | 1,02979    | -1,84744   | 0,0646838  | 0,213178   | no  |
| AN4796 | ChrIII_A_nidulans_FGSC_A4:962151-962835   | WT_5hasex | WT_veg | OK     | 47,676  | 76,0055 | 0,672839   | -1,23962   | 0,215118   | 0,474856   | no  |
| AN4797 | ChrIII_A_nidulans_FGSC_A4:959890-961982   | WT_5hasex | WT_veg | OK     | 17,5658 | 27,0415 | 0,622406   | -1,22174   | 0,221806   | 0,483364   | no  |
| AN4799 | ChrIII_A_nidulans_FGSC_A4:952237-954473   | WT_5hasex | WT_veg | OK     | 29,5373 | 54,9702 | 0,896111   | -1,82056   | 0,0686744  | 0,222484   | no  |
| AN4800 | ChrIII_A_nidulans_FGSC_A4:949518-951818   | WT_5hasex | WT_veg | OK     | 34,0526 | 37,0498 | 0,121701   | -0,233199  | 0,815607   | 0,926118   | no  |
| AN4801 | ChrIII_A_nidulans_FGSC_A4:946928-949193   | WT_5hasex | WT_veg | OK     | 10,1173 | 29,4225 | 1,5401     | -2,53006   | 0,0114044  | 0,0577964  | no  |
| AN4802 | ChrIII_A_nidulans_FGSC_A4:942795-944037   | WT_5hasex | WT_veg | OK     | 764,524 | 1396,34 | 0,869012   | -1,53763   | 0,124138   | 0,334744   | no  |
| AN4803 | ChrIII_A_nidulans_FGSC_A4:941516-942583   | WT_5hasex | WT_veg | OK     | 1227,73 | 2059,18 | 0,746072   | -1,29186   | 0,196404   | 0,449391   | no  |
| AN4804 | ChrIII_A_nidulans_FGSC_A4:940421-941419   | WT_5hasex | WT_veg | OK     | 19,2432 | 33,7599 | 0,810963   | -1,39797   | 0,162121   | 0,398269   | no  |
| AN4805 | ChrIII_A_nidulans_FGSC_A4:938862-940084   | WT_5hasex | WT_veg | OK     | 16,0531 | 33,1231 | 1,04498    | -1,85235   | 0,0639761  | 0,211432   | no  |
| AN4806 | ChrIII_A_nidulans_FGSC_A4:937536-938456   | WT_5hasex | WT_veg | OK     | 31,6711 | 32,2148 | 0,0245583  | -0,0434247 | 0,965363   | 0,987332   | no  |
| AN4807 | ChrIII_A_nidulans_FGSC_A4:935652-936923   | WT_5hasex | WT_veg | OK     | 6,2271  | 26,6704 | 2,09861    | -3,10809   | 0,00188302 | 0,0132662  | yes |

## Supplementary table 1

|        |                                         |           |        |        |          |          |           |            |            |            |     |
|--------|-----------------------------------------|-----------|--------|--------|----------|----------|-----------|------------|------------|------------|-----|
| AN4809 | ChrIII_A_nidulans_FGSC_A4:922910-925502 | WT_5hasex | WT_veg | OK     | 17,4542  | 2,12439  | -3,03845  | 4,78288    | 1,728E-06  | 3,0113E-05 | yes |
| AN4810 | ChrIII_A_nidulans_FGSC_A4:920812-922707 | WT_5hasex | WT_veg | OK     | 16,7099  | 32,0854  | 0,941214  | -1,67727   | 0,0934906  | 0,276239   | no  |
| AN4811 | ChrIII_A_nidulans_FGSC_A4:918956-920423 | WT_5hasex | WT_veg | OK     | 5,18148  | 7,56345  | 0,545679  | -0,743638  | 0,457096   | 0,717999   | no  |
| AN4812 | ChrIII_A_nidulans_FGSC_A4:916659-917262 | WT_5hasex | WT_veg | OK     | 58,0627  | 93,5659  | 0,688371  | -1,18741   | 0,235065   | 0,500258   | no  |
| AN4813 | ChrIII_A_nidulans_FGSC_A4:913069-916377 | WT_5hasex | WT_veg | OK     | 8,59616  | 13,6566  | 0,667833  | -1,22746   | 0,219651   | 0,480884   | no  |
| AN4814 | ChrIII_A_nidulans_FGSC_A4:911040-912707 | WT_5hasex | WT_veg | OK     | 47,513   | 125,361  | 1,39969   | -2,89186   | 0,0038297  | 0,0239537  | yes |
| AN4815 | ChrIII_A_nidulans_FGSC_A4:905500-906825 | WT_5hasex | WT_veg | NOTEST | 0,855157 | 1,05502  | 0,303009  | -0,246645  | 0,805183   | 1          | no  |
| AN4816 | ChrIII_A_nidulans_FGSC_A4:903532-905298 | WT_5hasex | WT_veg | OK     | 27,8315  | 24,5035  | -0,18373  | 0,359366   | 0,719321   | 0,879753   | no  |
| AN4817 | ChrIII_A_nidulans_FGSC_A4:899424-902186 | WT_5hasex | WT_veg | OK     | 223,79   | 238,611  | 0,0925117 | -0,177155  | 0,859387   | 0,9454     | no  |
| AN4818 | ChrIII_A_nidulans_FGSC_A4:894629-898602 | WT_5hasex | WT_veg | OK     | 22,4645  | 53,749   | 1,25859   | -2,59894   | 0,00935112 | 0,049372   | yes |
| AN4820 | ChrIII_A_nidulans_FGSC_A4:889284-890910 | WT_5hasex | WT_veg | OK     | 47,4253  | 104,707  | 1,14263   | -2,06687   | 0,038746   | 0,147331   | no  |
| AN4821 | ChrIII_A_nidulans_FGSC_A4:886050-888126 | WT_5hasex | WT_veg | OK     | 8,39828  | 24,8466  | 1,56488   | -2,64063   | 0,00827513 | 0,0447968  | yes |
| AN4822 | ChrIII_A_nidulans_FGSC_A4:884607-885815 | WT_5hasex | WT_veg | OK     | 1025,75  | 4127,75  | 2,00867   | -3,33793   | 0,00084404 | 0,00680141 | yes |
| AN4823 | ChrIII_A_nidulans_FGSC_A4:870786-872291 | WT_5hasex | WT_veg | NOTEST | 1,15599  | 1,18442  | 0,0350465 | -0,0315263 | 0,97485    | 1          | no  |
| AN4824 | ChrIII_A_nidulans_FGSC_A4:869042-870560 | WT_5hasex | WT_veg | OK     | 49,6025  | 62,9536  | 0,343875  | -0,707656  | 0,479159   | 0,734436   | no  |
| AN4825 | ChrIII_A_nidulans_FGSC_A4:864632-868335 | WT_5hasex | WT_veg | NOTEST | 1,25639  | 3,71388  | 1,56364   | -2,13922   | 0,032418   | 1          | no  |
| AN4826 | ChrIII_A_nidulans_FGSC_A4:862083-863556 | WT_5hasex | WT_veg | NOTEST | 0,723895 | 0,594933 | -0,283051 | 0,18959    | 0,849631   | 1          | no  |
| AN4827 | ChrIII_A_nidulans_FGSC_A4:857929-861299 | WT_5hasex | WT_veg | NOTEST | 1,27456  | 2,68656  | 1,07577   | -1,40251   | 0,160763   | 1          | no  |
| AN4829 | ChrIII_A_nidulans_FGSC_A4:850727-852107 | WT_5hasex | WT_veg | NOTEST | 0,90369  | 2,44216  | 1,43426   | -1,32118   | 0,186442   | 1          | no  |
| AN4830 | ChrIII_A_nidulans_FGSC_A4:849309-850506 | WT_5hasex | WT_veg | OK     | 29,5386  | 31,7064  | 0,102176  | -0,197466  | 0,843463   | 0,937973   | no  |
| AN4831 | ChrIII_A_nidulans_FGSC_A4:847522-848897 | WT_5hasex | WT_veg | OK     | 17,6675  | 47,3576  | 1,4225    | -2,51505   | 0,0119015  | 0,0597893  | no  |
| AN4832 | ChrIII_A_nidulans_FGSC_A4:845407-846961 | WT_5hasex | WT_veg | OK     | 12,074   | 25,2969  | 1,06706   | -1,82919   | 0,067371   | 0,219414   | no  |
| AN4833 | ChrIII_A_nidulans_FGSC_A4:843728-844776 | WT_5hasex | WT_veg | OK     | 191,864  | 95,4631  | -1,00707  | 1,97484    | 0,0482859  | 0,173342   | no  |
| AN4834 | ChrIII_A_nidulans_FGSC_A4:841057-842656 | WT_5hasex | WT_veg | OK     | 14,6574  | 18,6429  | 0,346992  | -0,633716  | 0,526266   | 0,767364   | no  |
| AN4835 | ChrIII_A_nidulans_FGSC_A4:839594-840739 | WT_5hasex | WT_veg | OK     | 9,61026  | 24,0942  | 1,32604   | -2,12747   | 0,0333808  | 0,131778   | no  |
| AN4836 | ChrIII_A_nidulans_FGSC_A4:836865-839101 | WT_5hasex | WT_veg | OK     | 25,939   | 36,3541  | 0,486998  | -0,953513  | 0,34033    | 0,615984   | no  |
| AN4837 | ChrIII_A_nidulans_FGSC_A4:833914-836302 | WT_5hasex | WT_veg | OK     | 21,069   | 100,648  | 2,25612   | -4,177     | 2,9538E-05 | 0,00037864 | yes |
| AN4838 | ChrIII_A_nidulans_FGSC_A4:831157-831808 | WT_5hasex | WT_veg | OK     | 15,81    | 42,7546  | 1,43524   | -2,30498   | 0,0211677  | 0,0931189  | no  |
| AN4839 | ChrIII_A_nidulans_FGSC_A4:826903-828559 | WT_5hasex | WT_veg | OK     | 14,7678  | 9,40266  | -0,651317 | 1,04311    | 0,296898   | 0,572197   | no  |
| AN4840 | ChrIII_A_nidulans_FGSC_A4:820511-824275 | WT_5hasex | WT_veg | OK     | 38,5996  | 47,5457  | 0,300728  | -0,589019  | 0,555849   | 0,785882   | no  |
| AN4842 | ChrIII_A_nidulans_FGSC_A4:818467-820139 | WT_5hasex | WT_veg | OK     | 189,955  | 127,633  | -0,573656 | 1,077      | 0,28148    | 0,555205   | no  |
| AN4845 | ChrIII_A_nidulans_FGSC_A4:810650-811832 | WT_5hasex | WT_veg | OK     | 10,4569  | 10,7021  | 0,0334346 | -0,0496731 | 0,960383   | 0,985323   | no  |
| AN4846 | ChrIII_A_nidulans_FGSC_A4:807801-808746 | WT_5hasex | WT_veg | OK     | 18,4122  | 16,8259  | -0,12998  | 0,207191   | 0,835861   | 0,934811   | no  |
| AN4848 | ChrIII_A_nidulans_FGSC_A4:802707-804525 | WT_5hasex | WT_veg | OK     | 57,4641  | 131,948  | 1,19924   | -2,30099   | 0,0213923  | 0,0937998  | no  |
| AN4849 | ChrIII_A_nidulans_FGSC_A4:798411-799379 | WT_5hasex | WT_veg | NOTEST | 0,827765 | 1,29691  | 0,647782  | -0,476822  | 0,633489   | 1          | no  |
| AN4850 | ChrIII_A_nidulans_FGSC_A4:795216-797746 | WT_5hasex | WT_veg | OK     | 21,2261  | 61,3983  | 1,53236   | -3,10494   | 0,00190321 | 0,0133868  | yes |
| AN4852 | ChrIII_A_nidulans_FGSC_A4:785937-789121 | WT_5hasex | WT_veg | OK     | 11,8042  | 15,1441  | 0,359452  | -0,681571  | 0,49551    | 0,746524   | no  |
| AN4854 | ChrIII_A_nidulans_FGSC_A4:779196-780454 | WT_5hasex | WT_veg | OK     | 49,0794  | 82,9158  | 0,756528  | -1,51014   | 0,131008   | 0,346966   | no  |
| AN4855 | ChrIII_A_nidulans_FGSC_A4:773826-774874 | WT_5hasex | WT_veg | OK     | 5,86816  | 2,54752  | -1,20382  | 1,20762    | 0,227195   | 0,490119   | no  |
| AN4857 | ChrIII_A_nidulans_FGSC_A4:763316-765430 | WT_5hasex | WT_veg | OK     | 57,4108  | 53,4075  | -0,104281 | 0,209435   | 0,834109   | 0,93403    | no  |
| AN4861 | ChrIII_A_nidulans_FGSC_A4:740254-741964 | WT_5hasex | WT_veg | OK     | 41,6911  | 142,44   | 1,77254   | -3,68027   | 0,00023299 | 0,0022706  | yes |
| AN4863 | ChrIII_A_nidulans_FGSC_A4:737433-738076 | WT_5hasex | WT_veg | OK     | 178,384  | 280,492  | 0,652973  | -1,23483   | 0,216893   | 0,477031   | no  |
| AN4864 | ChrIII_A_nidulans_FGSC_A4:735396-737291 | WT_5hasex | WT_veg | OK     | 12,4968  | 23,6551  | 0,920594  | -1,64528   | 0,0999116  | 0,289178   | no  |
| AN4865 | ChrIII_A_nidulans_FGSC_A4:732817-735062 | WT_5hasex | WT_veg | OK     | 184,154  | 763,047  | 2,05086   | -3,87271   | 0,00010763 | 0,00117037 | yes |
| AN4866 | ChrIII_A_nidulans_FGSC_A4:730213-732090 | WT_5hasex | WT_veg | OK     | 137,709  | 104,786  | -0,394175 | 0,799756   | 0,423852   | 0,691701   | no  |
| AN4868 | ChrIII_A_nidulans_FGSC_A4:725080-726337 | WT_5hasex | WT_veg | OK     | 12,5515  | 57,5106  | 2,19597   | -3,76002   | 0,0001699  | 0,00173281 | yes |
| AN4869 | ChrIII_A_nidulans_FGSC_A4:723519-724726 | WT_5hasex | WT_veg | OK     | 291,504  | 537,602  | 0,883021  | -1,77368   | 0,0761164  | 0,2393     | no  |
| AN4870 | ChrIII_A_nidulans_FGSC_A4:721386-722103 | WT_5hasex | WT_veg | OK     | 8,19188  | 24,6426  | 1,58889   | -2,19071   | 0,028473   | 0,116402   | no  |
| AN4873 | ChrIII_A_nidulans_FGSC_A4:713135-715437 | WT_5hasex | WT_veg | OK     | 89,9962  | 170,254  | 0,919751  | -1,76143   | 0,0781657  | 0,243859   | no  |
| AN4874 | ChrIII_A_nidulans_FGSC_A4:710504-712347 | WT_5hasex | WT_veg | OK     | 30,3511  | 51,4503  | 0,761427  | -1,50809   | 0,131532   | 0,347897   | no  |
| AN4875 | ChrIII_A_nidulans_FGSC_A4:708762-710218 | WT_5hasex | WT_veg | OK     | 63,6026  | 93,9252  | 0,562426  | -1,1375    | 0,255328   | 0,524652   | no  |
| AN4876 | ChrIII_A_nidulans_FGSC_A4:704529-708576 | WT_5hasex | WT_veg | OK     | 27,5078  | 47,8562  | 0,798865  | -1,67517   | 0,0939009  | 0,277029   | no  |
| AN4877 | ChrIII_A_nidulans_FGSC_A4:699015-700690 | WT_5hasex | WT_veg | OK     | 11,958   | 20,0474  | 0,745445  | -1,32089   | 0,18654    | 0,435705   | no  |

## Supplementary table 1

|        |                                         |           |        |        |         |         |               |               |            |            |     |
|--------|-----------------------------------------|-----------|--------|--------|---------|---------|---------------|---------------|------------|------------|-----|
| AN4878 | ChrIII_A_nidulans_FGSC_A4:694356-697751 | WT_5hasex | WT_veg | OK     | 149,435 | 827,035 | 2,46843       | -4,34496      | 1,393E-05  | 0,00019347 | yes |
| AN4879 | ChrIII_A_nidulans_FGSC_A4:691420-692042 | WT_5hasex | WT_veg | OK     | 7,92307 | 21,9151 | 1,46779       | -1,92546      | 0,0541714  | 0,187781   | no  |
| AN4880 | ChrIII_A_nidulans_FGSC_A4:687790-690384 | WT_5hasex | WT_veg | OK     | 76,9161 | 170,384 | 1,14743       | -2,2434       | 0,0248713  | 0,104961   | no  |
| AN4881 | ChrIII_A_nidulans_FGSC_A4:684451-685610 | WT_5hasex | WT_veg | OK     | 37,6629 | 70,9294 | 0,913241      | -1,76297      | 0,0779056  | 0,243363   | no  |
| AN4883 | ChrIII_A_nidulans_FGSC_A4:678489-681150 | WT_5hasex | WT_veg | OK     | 8,72624 | 12,1536 | 0,477955      | -0,865958     | 0,386513   | 0,660113   | no  |
| AN4884 | ChrIII_A_nidulans_FGSC_A4:675505-678013 | WT_5hasex | WT_veg | OK     | 26,6463 | 37,0432 | 0,475274      | -0,969461     | 0,332315   | 0,608689   | no  |
| AN4886 | ChrIII_A_nidulans_FGSC_A4:661193-668978 | WT_5hasex | WT_veg | OK     | 31,8015 | 50,2374 | 0,659668      | -1,31328      | 0,189089   | 0,439338   | no  |
| AN4889 | ChrIII_A_nidulans_FGSC_A4:656520-657614 | WT_5hasex | WT_veg | OK     | 44,935  | 203,595 | 2,1798        | -4,28622      | 1,8174E-05 | 0,00024602 | yes |
| AN4890 | ChrIII_A_nidulans_FGSC_A4:650648-654106 | WT_5hasex | WT_veg | OK     | 26,8235 | 121,055 | 2,17409       | -4,51279      | 6,3982E-06 | 9,6483E-05 | yes |
| AN4891 | ChrIII_A_nidulans_FGSC_A4:648817-649815 | WT_5hasex | WT_veg | OK     | 105,973 | 256,657 | 1,27614       | -2,58801      | 0,00965311 | 0,050645   | no  |
| AN4892 | ChrIII_A_nidulans_FGSC_A4:644738-648455 | WT_5hasex | WT_veg | OK     | 11,3759 | 20,538  | 0,852313      | -1,6887       | 0,0912772  | 0,271494   | no  |
| AN4894 | ChrIII_A_nidulans_FGSC_A4:635820-639833 | WT_5hasex | WT_veg | OK     | 19,968  | 37,2422 | 0,899248      | -1,86032      | 0,0628401  | 0,20873    | no  |
| AN4895 | ChrIII_A_nidulans_FGSC_A4:634452-635202 | WT_5hasex | WT_veg | OK     | 90,712  | 166,367 | 0,875         | -1,77023      | 0,0766881  | 0,240592   | no  |
| AN4896 | ChrIII_A_nidulans_FGSC_A4:631835-633213 | WT_5hasex | WT_veg | OK     | 69,0042 | 129,177 | 0,904592      | -1,8601       | 0,0628719  | 0,208771   | no  |
| AN4897 | ChrIII_A_nidulans_FGSC_A4:626914-628288 | WT_5hasex | WT_veg | OK     | 558,553 | 1494    | 1,41941       | -2,47953      | 0,0131556  | 0,064682   | no  |
| AN4898 | ChrIII_A_nidulans_FGSC_A4:623682-626585 | WT_5hasex | WT_veg | OK     | 7,6578  | 14,8192 | 0,95247       | -1,66167      | 0,0965789  | 0,282325   | no  |
| AN4899 | ChrIII_A_nidulans_FGSC_A4:621986-623601 | WT_5hasex | WT_veg | OK     | 34,163  | 226,845 | 2,7312        | -5,58373      | 2,3542E-08 | 6,2972E-07 | yes |
| AN4901 | ChrIII_A_nidulans_FGSC_A4:612548-615203 | WT_5hasex | WT_veg | OK     | 26,9426 | 69,0724 | 1,35822       | -2,73156      | 0,00630362 | 0,0359789  | yes |
| AN4902 | ChrIII_A_nidulans_FGSC_A4:610263-611555 | WT_5hasex | WT_veg | OK     | 23,858  | 38,908  | 0,705591      | -1,35453      | 0,175569   | 0,419959   | no  |
| AN4903 | ChrIII_A_nidulans_FGSC_A4:608441-610067 | WT_5hasex | WT_veg | OK     | 8,44473 | 44,4422 | 2,39581       | -3,99036      | 6,5973E-05 | 0,00076299 | yes |
| AN4904 | ChrIII_A_nidulans_FGSC_A4:605749-608211 | WT_5hasex | WT_veg | OK     | 12,0315 | 36,0487 | 1,58313       | -2,91825      | 0,00352007 | 0,0223641  | yes |
| AN4906 | ChrIII_A_nidulans_FGSC_A4:599084-601111 | WT_5hasex | WT_veg | OK     | 67,3571 | 147,703 | 1,1328        | -2,24807      | 0,024572   | 0,103992   | no  |
| AN4907 | ChrIII_A_nidulans_FGSC_A4:594505-597601 | WT_5hasex | WT_veg | OK     | 6,91394 | 17,0396 | 1,30131       | -2,32719      | 0,0199549  | 0,0890241  | no  |
| AN4908 | ChrIII_A_nidulans_FGSC_A4:589753-593698 | WT_5hasex | WT_veg | OK     | 32,9716 | 113,327 | 1,7812        | -3,53178      | 0,00041278 | 0,00369436 | yes |
| AN4909 | ChrIII_A_nidulans_FGSC_A4:588240-589291 | WT_5hasex | WT_veg | OK     | 7,83685 | 20,8426 | 1,41119       | -2,03051      | 0,0423046  | 0,157158   | no  |
| AN4910 | ChrIII_A_nidulans_FGSC_A4:585367-587753 | WT_5hasex | WT_veg | OK     | 32,9474 | 84,7512 | 1,36307       | -2,78185      | 0,00540492 | 0,0316563  | yes |
| AN4911 | ChrIII_A_nidulans_FGSC_A4:583797-584952 | WT_5hasex | WT_veg | OK     | 277,792 | 988,117 | 1,83068       | -3,50088      | 0,00046372 | 0,00408422 | yes |
| AN4912 | ChrIII_A_nidulans_FGSC_A4:582293-583350 | WT_5hasex | WT_veg | OK     | 24,2724 | 54,5764 | 1,16896       | -2,06582      | 0,0388452  | 0,147623   | no  |
| AN4914 | ChrIII_A_nidulans_FGSC_A4:576037-577803 | WT_5hasex | WT_veg | OK     | 20,1711 | 91,7608 | 2,18559       | -4,12726      | 3,6711E-05 | 0,00045792 | yes |
| AN4916 | ChrIII_A_nidulans_FGSC_A4:562760-564000 | WT_5hasex | WT_veg | OK     | 850,227 | 1377,92 | 0,69657       | -1,24673      | 0,212495   | 0,471476   | no  |
| AN4918 | ChrIII_A_nidulans_FGSC_A4:558281-560434 | WT_5hasex | WT_veg | OK     | 24,7643 | 110,871 | 2,16254       | -4,10776      | 3,9952E-05 | 0,00049283 | yes |
| AN4919 | ChrIII_A_nidulans_FGSC_A4:558281-560434 | WT_5hasex | WT_veg | OK     | 105,76  | 155,912 | 0,559935      | -1,15376      | 0,248599   | 0,516742   | no  |
| AN4921 | ChrIII_A_nidulans_FGSC_A4:548328-550159 | WT_5hasex | WT_veg | OK     | 2,46709 | 1,22349 | -1,01181      | 1,11878       | 0,263233   | 0,534032   | no  |
| AN4922 | ChrIII_A_nidulans_FGSC_A4:546094-548056 | WT_5hasex | WT_veg | OK     | 6,43332 | 16,8289 | 1,38731       | -2,04332      | 0,0410206  | 0,153546   | no  |
| AN4923 | ChrIII_A_nidulans_FGSC_A4:542980-544797 | WT_5hasex | WT_veg | OK     | 165,648 | 71,3544 | -1,21505      | 2,35554       | 0,0184959  | 0,0838732  | no  |
| AN4924 | ChrIII_A_nidulans_FGSC_A4:541119-541619 | WT_5hasex | WT_veg | NOTEST | 0,63213 | 0       | -1.79769e+308 | -1.79769e+308 | 0,224063   | 1          | no  |
| AN4925 | ChrIII_A_nidulans_FGSC_A4:536695-539405 | WT_5hasex | WT_veg | OK     | 27,2289 | 33,3042 | 0,290562      | -0,5955       | 0,551509   | 0,783066   | no  |
| AN4926 | ChrIII_A_nidulans_FGSC_A4:531953-535410 | WT_5hasex | WT_veg | OK     | 9,32938 | 10,3749 | 0,153243      | -0,292045     | 0,770252   | 0,905596   | no  |
| AN4927 | ChrIII_A_nidulans_FGSC_A4:528834-529564 | WT_5hasex | WT_veg | OK     | 549,185 | 854,203 | 0,637286      | -1,26577      | 0,205595   | 0,462195   | no  |
| AN4928 | ChrIII_A_nidulans_FGSC_A4:526744-527939 | WT_5hasex | WT_veg | OK     | 55,7445 | 155,419 | 1,47926       | -3,02473      | 0,00248852 | 0,0167463  | yes |
| AN4929 | ChrIII_A_nidulans_FGSC_A4:523243-526332 | WT_5hasex | WT_veg | OK     | 86,1569 | 273,344 | 1,66568       | -3,07015      | 0,00213949 | 0,0147737  | yes |
| AN4930 | ChrIII_A_nidulans_FGSC_A4:515720-517098 | WT_5hasex | WT_veg | OK     | 46,6824 | 111,031 | 1,25001       | -2,56978      | 0,0101762  | 0,0528133  | no  |
| AN4931 | ChrIII_A_nidulans_FGSC_A4:514594-515631 | WT_5hasex | WT_veg | OK     | 31,0539 | 42,4539 | 0,45112       | -0,841439     | 0,400102   | 0,672325   | no  |
| AN4933 | ChrIII_A_nidulans_FGSC_A4:511110-512237 | WT_5hasex | WT_veg | OK     | 10,7576 | 21,4212 | 0,993676      | -1,55205      | 0,120651   | 0,328725   | no  |
| AN4934 | ChrIII_A_nidulans_FGSC_A4:509751-510854 | WT_5hasex | WT_veg | OK     | 15,7504 | 38,1092 | 1,27475       | -2,16012      | 0,0307636  | 0,12373    | no  |
| AN4935 | ChrIII_A_nidulans_FGSC_A4:506800-508821 | WT_5hasex | WT_veg | OK     | 357,311 | 347,961 | -0,0382572    | 0,0726793     | 0,942061   | 0,978386   | no  |
| AN4936 | ChrIII_A_nidulans_FGSC_A4:501678-504118 | WT_5hasex | WT_veg | OK     | 41,2655 | 88,7173 | 1,10428       | -2,28457      | 0,0223382  | 0,0968131  | no  |
| AN4937 | ChrIII_A_nidulans_FGSC_A4:498330-501311 | WT_5hasex | WT_veg | OK     | 248,078 | 641,978 | 1,37173       | -2,6091       | 0,00907811 | 0,0482662  | yes |
| AN4938 | ChrIII_A_nidulans_FGSC_A4:498330-501311 | WT_5hasex | WT_veg | OK     | 57,1616 | 75,5542 | 0,402466      | -0,817655     | 0,413554   | 0,682978   | no  |
| AN4939 | ChrIII_A_nidulans_FGSC_A4:494985-496130 | WT_5hasex | WT_veg | OK     | 129,595 | 201,222 | 0,634776      | -1,31214      | 0,189473   | 0,439981   | no  |
| AN4940 | ChrIII_A_nidulans_FGSC_A4:492910-494973 | WT_5hasex | WT_veg | OK     | 403,066 | 2325,18 | 2,52826       | -4,38237      | 1,174E-05  | 0,00016541 | yes |
| AN4941 | ChrIII_A_nidulans_FGSC_A4:489940-492318 | WT_5hasex | WT_veg | OK     | 41,62   | 53,503  | 0,362345      | -0,673188     | 0,500827   | 0,750259   | no  |
| AN4942 | ChrIII_A_nidulans_FGSC_A4:489940-492318 | WT_5hasex | WT_veg | OK     | 414,92  | 673,294 | 0,698403      | -1,32112      | 0,186461   | 0,435606   | no  |

## Supplementary table 1

|        |                                         |           |        |    |         |         |               |               |            |            |     |
|--------|-----------------------------------------|-----------|--------|----|---------|---------|---------------|---------------|------------|------------|-----|
| AN4943 | ChrIII_A_nidulans_FGSC_A4:487296-489720 | WT_5hasex | WT_veg | OK | 11,3648 | 15,6824 | 0,464567      | -0,879184     | 0,379301   | 0,653928   | no  |
| AN4944 | ChrIII_A_nidulans_FGSC_A4:485549-486970 | WT_5hasex | WT_veg | OK | 5,58696 | 17,1608 | 1,61898       | -2,4255       | 0,0152871  | 0,072548   | no  |
| AN4945 | ChrIII_A_nidulans_FGSC_A4:481731-484023 | WT_5hasex | WT_veg | OK | 38,6441 | 97,5589 | 1,33602       | -2,78611      | 0,00533441 | 0,0313238  | yes |
| AN4946 | ChrIII_A_nidulans_FGSC_A4:480447-480983 | WT_5hasex | WT_veg | OK | 57,7716 | 398,435 | 2,78591       | -5,29819      | 1,1695E-07 | 2,6798E-06 | yes |
| AN4947 | ChrIII_A_nidulans_FGSC_A4:479287-480115 | WT_5hasex | WT_veg | OK | 139,574 | 232,858 | 0,738418      | -1,53621      | 0,124488   | 0,33548    | no  |
| AN4948 | ChrIII_A_nidulans_FGSC_A4:478096-479219 | WT_5hasex | WT_veg | OK | 34,1902 | 64,1409 | 0,907663      | -1,70495      | 0,088204   | 0,265392   | no  |
| AN4949 | ChrIII_A_nidulans_FGSC_A4:475324-477567 | WT_5hasex | WT_veg | OK | 12,0239 | 8,06735 | -0,575743     | 1,04788       | 0,294696   | 0,56944    | no  |
| AN4950 | ChrIII_A_nidulans_FGSC_A4:473336-474343 | WT_5hasex | WT_veg | OK | 181,337 | 462,949 | 1,35218       | -2,78497      | 0,00535334 | 0,0313963  | yes |
| AN4951 | ChrIII_A_nidulans_FGSC_A4:469850-473159 | WT_5hasex | WT_veg | OK | 40,7009 | 68,3565 | 0,748018      | -1,54502      | 0,12234    | 0,33186    | no  |
| AN4952 | ChrIII_A_nidulans_FGSC_A4:464998-468632 | WT_5hasex | WT_veg | OK | 23,4825 | 29,5614 | 0,332131      | -0,688827     | 0,490932   | 0,743306   | no  |
| AN4953 | ChrIII_A_nidulans_FGSC_A4:462096-463728 | WT_5hasex | WT_veg | OK | 62,101  | 134,819 | 1,11834       | -2,29109      | 0,021958   | 0,0956559  | no  |
| AN4954 | ChrIII_A_nidulans_FGSC_A4:461301-462011 | WT_5hasex | WT_veg | OK | 79,7486 | 216,773 | 1,44266       | -2,89141      | 0,00383512 | 0,0239676  | yes |
| AN4955 | ChrIII_A_nidulans_FGSC_A4:459553-460987 | WT_5hasex | WT_veg | OK | 66,8683 | 148,395 | 1,15005       | -2,3867       | 0,0170006  | 0,0787575  | no  |
| AN4956 | ChrIII_A_nidulans_FGSC_A4:456265-458626 | WT_5hasex | WT_veg | OK | 88,9315 | 152,446 | 0,777534      | -1,50866      | 0,131386   | 0,347617   | no  |
| AN4958 | ChrIII_A_nidulans_FGSC_A4:451887-453147 | WT_5hasex | WT_veg | OK | 12,9104 | 16,3461 | 0,340418      | -0,582579     | 0,560177   | 0,789075   | no  |
| AN4959 | ChrIII_A_nidulans_FGSC_A4:448834-451252 | WT_5hasex | WT_veg | OK | 6,23842 | 9,13324 | 0,549945      | -0,936211     | 0,349164   | 0,624937   | no  |
| AN4960 | ChrIII_A_nidulans_FGSC_A4:446253-447867 | WT_5hasex | WT_veg | OK | 34,8668 | 58,505  | 0,746706      | -1,48607      | 0,13726    | 0,357995   | no  |
| AN4961 | ChrIII_A_nidulans_FGSC_A4:445143-445957 | WT_5hasex | WT_veg | OK | 25,978  | 53,4425 | 1,0407        | -1,8766       | 0,0605725  | 0,203691   | no  |
| AN4962 | ChrIII_A_nidulans_FGSC_A4:444180-444911 | WT_5hasex | WT_veg | OK | 55,9274 | 54,2542 | -0,0438204    | 0,0809594     | 0,935474   | 0,975645   | no  |
| AN4963 | ChrIII_A_nidulans_FGSC_A4:438806-442342 | WT_5hasex | WT_veg | OK | 51,2222 | 55,0078 | 0,102868      | -0,210481     | 0,833292   | 0,933784   | no  |
| AN4964 | ChrIII_A_nidulans_FGSC_A4:436806-437858 | WT_5hasex | WT_veg | OK | 6,35736 | 10,486  | 0,721969      | -1,03835      | 0,299108   | 0,574534   | no  |
| AN4965 | ChrIII_A_nidulans_FGSC_A4:428679-435857 | WT_5hasex | WT_veg | OK | 25,5676 | 45,9647 | 0,846206      | -1,74108      | 0,0816691  | 0,25127    | no  |
| AN4966 | ChrIII_A_nidulans_FGSC_A4:426673-428017 | WT_5hasex | WT_veg | OK | 88,9919 | 286,896 | 1,68878       | -3,36996      | 0,00075179 | 0,00615262 | yes |
| AN4967 | ChrIII_A_nidulans_FGSC_A4:423863-426490 | WT_5hasex | WT_veg | OK | 57,2535 | 107,167 | 0,904426      | -1,86235      | 0,0625542  | 0,208151   | no  |
| AN4970 | ChrIII_A_nidulans_FGSC_A4:416692-417103 | WT_5hasex | WT_veg | OK | 3,00666 | 0       | -1.79769e+308 | -1.79769e+308 | 0,0587576  | 0,199173   | no  |
| AN4971 | ChrIII_A_nidulans_FGSC_A4:412368-415872 | WT_5hasex | WT_veg | OK | 11,2866 | 21,0574 | 0,899719      | -1,78216      | 0,0747239  | 0,235941   | no  |
| AN4972 | ChrIII_A_nidulans_FGSC_A4:408475-411719 | WT_5hasex | WT_veg | OK | 15,0312 | 37,8853 | 1,33368       | -2,59693      | 0,0094062  | 0,0496429  | yes |
| AN4973 | ChrIII_A_nidulans_FGSC_A4:405771-407950 | WT_5hasex | WT_veg | OK | 67,5571 | 161,262 | 1,25523       | -2,5895       | 0,00961145 | 0,050477   | no  |
| AN4974 | ChrIII_A_nidulans_FGSC_A4:401936-403044 | WT_5hasex | WT_veg | OK | 13,082  | 12,4871 | -0,0671387    | 0,106803      | 0,914945   | 0,967482   | no  |
| AN4975 | ChrIII_A_nidulans_FGSC_A4:400031-401705 | WT_5hasex | WT_veg | OK | 28,5477 | 25,7002 | -0,151594     | 0,295912      | 0,767297   | 0,904422   | no  |
| AN4976 | ChrIII_A_nidulans_FGSC_A4:397692-399362 | WT_5hasex | WT_veg | OK | 411,23  | 649,107 | 0,658512      | -1,22933      | 0,218947   | 0,479791   | no  |
| AN4977 | ChrIII_A_nidulans_FGSC_A4:393945-396185 | WT_5hasex | WT_veg | OK | 32,7194 | 87,3266 | 1,41628       | -2,90329      | 0,00369261 | 0,0232628  | yes |
| AN4978 | ChrIII_A_nidulans_FGSC_A4:391276-393465 | WT_5hasex | WT_veg | OK | 58,5265 | 111,084 | 0,924489      | -1,89492      | 0,0581035  | 0,197467   | no  |
| AN4979 | ChrIII_A_nidulans_FGSC_A4:389466-390603 | WT_5hasex | WT_veg | OK | 64,1858 | 167,666 | 1,38526       | -2,8526       | 0,00433626 | 0,0265237  | yes |
| AN4980 | ChrIII_A_nidulans_FGSC_A4:386545-388560 | WT_5hasex | WT_veg | OK | 22,0051 | 40,9423 | 0,895755      | -1,78515      | 0,0742373  | 0,234941   | no  |
| AN4982 | ChrIII_A_nidulans_FGSC_A4:382031-383818 | WT_5hasex | WT_veg | OK | 23,619  | 21,9757 | -0,104039     | 0,205969      | 0,836815   | 0,935164   | no  |
| AN4983 | ChrIII_A_nidulans_FGSC_A4:377735-379543 | WT_5hasex | WT_veg | OK | 5,9867  | 13,8102 | 1,2059        | -1,97288      | 0,0485094  | 0,173906   | no  |
| AN4984 | ChrIII_A_nidulans_FGSC_A4:374434-376535 | WT_5hasex | WT_veg | OK | 64,3376 | 322,284 | 2,3246        | -4,88521      | 1,0332E-06 | 1,8864E-05 | yes |
| AN4985 | ChrIII_A_nidulans_FGSC_A4:367936-371221 | WT_5hasex | WT_veg | OK | 4,92967 | 15,2443 | 1,6287        | -2,84256      | 0,00447527 | 0,0272369  | yes |
| AN4986 | ChrIII_A_nidulans_FGSC_A4:366722-367615 | WT_5hasex | WT_veg | OK | 8,93763 | 18,0427 | 1,01345       | -1,46395      | 0,143207   | 0,368015   | no  |
| AN4988 | ChrIII_A_nidulans_FGSC_A4:360823-362729 | WT_5hasex | WT_veg | OK | 653,84  | 2289,89 | 1,80827       | -3,02407      | 0,00249395 | 0,0167742  | yes |
| AN4989 | ChrIII_A_nidulans_FGSC_A4:358722-359772 | WT_5hasex | WT_veg | OK | 149,049 | 821,446 | 2,46238       | -4,93018      | 8,2154E-07 | 1,5425E-05 | yes |
| AN4990 | ChrIII_A_nidulans_FGSC_A4:356508-357439 | WT_5hasex | WT_veg | OK | 74,7998 | 57,0355 | -0,391174     | 0,797491      | 0,425166   | 0,692839   | no  |
| AN4992 | ChrIII_A_nidulans_FGSC_A4:346962-348909 | WT_5hasex | WT_veg | OK | 15,4095 | 25,9653 | 0,752764      | -1,37511      | 0,169096   | 0,40931    | no  |
| AN4993 | ChrIII_A_nidulans_FGSC_A4:345825-346647 | WT_5hasex | WT_veg | OK | 16,7667 | 35,255  | 1,07223       | -1,71091      | 0,0870984  | 0,263242   | no  |
| AN4994 | ChrIII_A_nidulans_FGSC_A4:342146-344294 | WT_5hasex | WT_veg | OK | 7,94153 | 34,44   | 2,1166        | -3,6288       | 0,00028474 | 0,00269865 | yes |
| AN4995 | ChrIII_A_nidulans_FGSC_A4:339806-341421 | WT_5hasex | WT_veg | OK | 56,4263 | 166,664 | 1,56251       | -3,12268      | 0,00179211 | 0,0127422  | yes |
| AN4996 | ChrIII_A_nidulans_FGSC_A4:338461-339392 | WT_5hasex | WT_veg | OK | 29,0923 | 62,8393 | 1,11103       | -2,05487      | 0,0398911  | 0,150569   | no  |
| AN4997 | ChrIII_A_nidulans_FGSC_A4:336234-337760 | WT_5hasex | WT_veg | OK | 142,509 | 234,759 | 0,720131      | -1,47259      | 0,140861   | 0,36392    | no  |
| AN4999 | ChrIII_A_nidulans_FGSC_A4:329457-330464 | WT_5hasex | WT_veg | OK | 4,04961 | 11,8055 | 1,54361       | -1,87421      | 0,0609016  | 0,204378   | no  |
| AN5000 | ChrIII_A_nidulans_FGSC_A4:327814-328650 | WT_5hasex | WT_veg | OK | 3,42278 | 6,52206 | 0,930159      | -1,07431      | 0,282682   | 0,556508   | no  |
| AN5002 | ChrIII_A_nidulans_FGSC_A4:320245-320896 | WT_5hasex | WT_veg | OK | 4,45568 | 0       | -1.79769e+308 | -1.79769e+308 | 0,0407588  | 0,152866   | no  |
| AN5003 | ChrIII_A_nidulans_FGSC_A4:313839-315809 | WT_5hasex | WT_veg | OK | 49,1743 | 70,1006 | 0,511522      | -1,06823      | 0,285417   | 0,559537   | no  |

## Supplementary table 1

|        |                                         |           |        |        |          |          |               |               |            |            |     |
|--------|-----------------------------------------|-----------|--------|--------|----------|----------|---------------|---------------|------------|------------|-----|
| AN5004 | ChrIII_A_nidulans_FGSC_A4:312092-312957 | WT_5hasex | WT_veg | OK     | 845,313  | 3467,77  | 2,03645       | -3,6947       | 0,00022015 | 0,00216355 | yes |
| AN5005 | ChrIII_A_nidulans_FGSC_A4:310048-311635 | WT_5hasex | WT_veg | OK     | 11,4915  | 21,3172  | 0,891448      | -1,55598      | 0,119714   | 0,327259   | no  |
| AN5007 | ChrIII_A_nidulans_FGSC_A4:301309-302526 | WT_5hasex | WT_veg | OK     | 57,5525  | 525,615  | 3,19106       | -5,40977      | 6,3106E-08 | 1,5424E-06 | yes |
| AN5008 | ChrIII_A_nidulans_FGSC_A4:299254-299694 | WT_5hasex | WT_veg | OK     | 171,531  | 140,257  | -0,290391     | 0,533641      | 0,59359    | 0,80896    | no  |
| AN5009 | ChrIII_A_nidulans_FGSC_A4:295867-298795 | WT_5hasex | WT_veg | OK     | 14,5113  | 21,4968  | 0,566948      | -1,09368      | 0,274097   | 0,546898   | no  |
| AN5010 | ChrIII_A_nidulans_FGSC_A4:292850-294101 | WT_5hasex | WT_veg | OK     | 19,6091  | 90,201   | 2,20162       | -4,00484      | 6,2059E-05 | 0,0007238  | yes |
| AN5011 | ChrIII_A_nidulans_FGSC_A4:289241-292461 | WT_5hasex | WT_veg | OK     | 133,73   | 89,4649  | -0,579928     | 1,13957       | 0,254465   | 0,523824   | no  |
| AN5013 | ChrIII_A_nidulans_FGSC_A4:279603-281753 | WT_5hasex | WT_veg | OK     | 7,91954  | 9,05524  | 0,193335      | -0,327549     | 0,743252   | 0,891991   | no  |
| AN5014 | ChrIII_A_nidulans_FGSC_A4:278509-279516 | WT_5hasex | WT_veg | OK     | 1009,67  | 1411,45  | 0,483297      | -0,839308     | 0,401296   | 0,673101   | no  |
| AN5016 | ChrIII_A_nidulans_FGSC_A4:273360-275116 | WT_5hasex | WT_veg | NOTEST | 0,138643 | 0,490078 | 1,82163       | -0,801305     | 0,422955   | 1          | no  |
| AN5017 | ChrIII_A_nidulans_FGSC_A4:271124-272441 | WT_5hasex | WT_veg | OK     | 81,7933  | 592,011  | 2,85557       | -5,10256      | 3,3508E-07 | 6,9266E-06 | yes |
| AN5018 | ChrIII_A_nidulans_FGSC_A4:268580-270104 | WT_5hasex | WT_veg | OK     | 2,70005  | 5,69834  | 1,07755       | -1,30445      | 0,192081   | 0,443333   | no  |
| AN5019 | ChrIII_A_nidulans_FGSC_A4:264402-265735 | WT_5hasex | WT_veg | OK     | 4,73864  | 3,70107  | -0,356532     | 0,462473      | 0,643742   | 0,838034   | no  |
| AN5021 | ChrIII_A_nidulans_FGSC_A4:258919-261428 | WT_5hasex | WT_veg | OK     | 225,759  | 305,945  | 0,438492      | -0,795693     | 0,426211   | 0,693428   | no  |
| AN5022 | ChrIII_A_nidulans_FGSC_A4:258037-258854 | WT_5hasex | WT_veg | OK     | 14,0614  | 20,7262  | 0,559718      | -0,84601      | 0,397547   | 0,67043    | no  |
| AN5023 | ChrIII_A_nidulans_FGSC_A4:255814-256772 | WT_5hasex | WT_veg | NOTEST | 0        | 0        | 0             | 0             | 1          | 1          | no  |
| AN5024 | ChrIII_A_nidulans_FGSC_A4:252984-254768 | WT_5hasex | WT_veg | NOTEST | 0        | 0        | 0             | 0             | 1          | 1          | no  |
| AN5025 | ChrIII_A_nidulans_FGSC_A4:250267-252157 | WT_5hasex | WT_veg | OK     | 12,605   | 43,3189  | 1,781         | -3,19269      | 0,00140952 | 0,0104221  | yes |
| AN5026 | ChrIII_A_nidulans_FGSC_A4:248210-249197 | WT_5hasex | WT_veg | OK     | 7,8914   | 33,0468  | 2,06616       | -3,15959      | 0,0015799  | 0,0114779  | yes |
| AN5027 | ChrIII_A_nidulans_FGSC_A4:244930-247007 | WT_5hasex | WT_veg | OK     | 86,6949  | 94,3472  | 0,122032      | -0,238635     | 0,811388   | 0,92443    | no  |
| AN5029 | ChrIII_A_nidulans_FGSC_A4:234802-236470 | WT_5hasex | WT_veg | NOTEST | 0        | 0        | 0             | 0             | 1          | 1          | no  |
| AN5030 | ChrIII_A_nidulans_FGSC_A4:233019-234231 | WT_5hasex | WT_veg | OK     | 0,776933 | 7,6819   | 3,3056        | -3,46072      | 0,00053873 | 0,00463775 | yes |
| AN5032 | ChrIII_A_nidulans_FGSC_A4:228076-229687 | WT_5hasex | WT_veg | NOTEST | 0,462869 | 0,604671 | 0,385547      | -0,24572      | 0,805899   | 1          | no  |
| AN5033 | ChrIII_A_nidulans_FGSC_A4:223936-225918 | WT_5hasex | WT_veg | OK     | 53,0691  | 72,3882  | 0,447883      | -0,900003     | 0,368119   | 0,64294    | no  |
| AN5034 | ChrIII_A_nidulans_FGSC_A4:220352-221604 | WT_5hasex | WT_veg | OK     | 11,3544  | 2,72263  | -2,06018      | 2,70514       | 0,00682749 | 0,0383754  | yes |
| AN5035 | ChrIII_A_nidulans_FGSC_A4:216105-218083 | WT_5hasex | WT_veg | OK     | 6,0022   | 1,72743  | -1,79686      | 2,26394       | 0,0235778  | 0,100878   | no  |
| AN5036 | ChrIII_A_nidulans_FGSC_A4:210863-212006 | WT_5hasex | WT_veg | OK     | 7,49045  | 34,899   | 2,22006       | -3,41091      | 0,00064747 | 0,00542248 | yes |
| AN5037 | ChrIII_A_nidulans_FGSC_A4:204097-208224 | WT_5hasex | WT_veg | OK     | 38,1973  | 120,26   | 1,65462       | -2,54804      | 0,0108331  | 0,0555023  | no  |
| AN5038 | ChrIII_A_nidulans_FGSC_A4:199490-200214 | WT_5hasex | WT_veg | NOTEST | 0        | 0        | 0             | 0             | 1          | 1          | no  |
| AN5039 | ChrIII_A_nidulans_FGSC_A4:195271-197830 | WT_5hasex | WT_veg | NOTEST | 0,203477 | 0        | -1.79769e+308 | -1.79769e+308 | 0,107729   | 1          | no  |
| AN5040 | ChrIII_A_nidulans_FGSC_A4:192398-195161 | WT_5hasex | WT_veg | NOTEST | 0        | 0        | 0             | 0             | 1          | 1          | no  |
| AN5041 | ChrIII_A_nidulans_FGSC_A4:189114-190680 | WT_5hasex | WT_veg | NOTEST | 0,111004 | 0        | -1.79769e+308 | -1.79769e+308 | 0,165569   | 1          | no  |
| AN5044 | ChrIII_A_nidulans_FGSC_A4:176261-178368 | WT_5hasex | WT_veg | NOTEST | 0,558701 | 1,6639   | 1,57442       | -1,483        | 0,138075   | 1          | no  |
| AN5046 | ChrIII_A_nidulans_FGSC_A4:170618-171174 | WT_5hasex | WT_veg | OK     | 30,4737  | 0        | -1.79769e+308 | -1.79769e+308 | 0,0160461  | 0,0753311  | no  |
| AN5047 | ChrIII_A_nidulans_FGSC_A4:165235-166227 | WT_5hasex | WT_veg | NOTEST | 0,737294 | 0        | -1.79769e+308 | -1.79769e+308 | 0,224063   | 1          | no  |
| AN5048 | ChrIII_A_nidulans_FGSC_A4:163107-165067 | WT_5hasex | WT_veg | OK     | 14,2992  | 27,9456  | 0,966692      | -1,78379      | 0,0744585  | 0,23533    | no  |
| AN5049 | ChrIII_A_nidulans_FGSC_A4:159695-161442 | WT_5hasex | WT_veg | OK     | 20,418   | 30,7582  | 0,591127      | -1,13239      | 0,257469   | 0,527274   | no  |
| AN5050 | ChrIII_A_nidulans_FGSC_A4:154146-156399 | WT_5hasex | WT_veg | OK     | 98,7135  | 88,3093  | -0,160682     | 0,30708       | 0,758782   | 0,900238   | no  |
| AN5051 | ChrIII_A_nidulans_FGSC_A4:151998-152619 | WT_5hasex | WT_veg | OK     | 145,107  | 36,7848  | -1,97994      | 3,56947       | 0,0003577  | 0,00327009 | yes |
| AN5052 | ChrIII_A_nidulans_FGSC_A4:149505-151814 | WT_5hasex | WT_veg | OK     | 62,5695  | 66,0472  | 0,0780385     | -0,157541     | 0,874819   | 0,952095   | no  |
| AN5053 | ChrIII_A_nidulans_FGSC_A4:145503-146544 | WT_5hasex | WT_veg | OK     | 5,90212  | 30,3306  | 2,36147       | -3,55062      | 0,00038433 | 0,00347245 | yes |
| AN5054 | ChrIII_A_nidulans_FGSC_A4:142756-143797 | WT_5hasex | WT_veg | NOTEST | 0,267414 | 0        | -1.79769e+308 | -1.79769e+308 | 0,224063   | 1          | no  |
| AN5055 | ChrIII_A_nidulans_FGSC_A4:139263-140797 | WT_5hasex | WT_veg | OK     | 25,4572  | 73,8579  | 1,53668       | -2,83922      | 0,00452246 | 0,0274575  | yes |
| AN5056 | ChrIII_A_nidulans_FGSC_A4:136015-136584 | WT_5hasex | WT_veg | OK     | 3739,32  | 33212,2  | 3,15086       | -3,83199      | 0,00012711 | 0,00135327 | yes |
| AN5057 | ChrIII_A_nidulans_FGSC_A4:132091-134147 | WT_5hasex | WT_veg | OK     | 31,1806  | 52,6957  | 0,757035      | -1,54579      | 0,122154   | 0,331613   | no  |
| AN5059 | ChrIII_A_nidulans_FGSC_A4:125570-127028 | WT_5hasex | WT_veg | NOTEST | 0,163888 | 0        | -1.79769e+308 | -1.79769e+308 | 0,23809    | 1          | no  |
| AN5060 | ChrIII_A_nidulans_FGSC_A4:123150-124243 | WT_5hasex | WT_veg | NOTEST | 0        | 0        | 0             | 0             | 1          | 1          | no  |
| AN5062 | ChrIII_A_nidulans_FGSC_A4:114481-116143 | WT_5hasex | WT_veg | NOTEST | 0,159995 | 0        | -1.79769e+308 | -1.79769e+308 | 0,165569   | 1          | no  |
| AN5063 | ChrIII_A_nidulans_FGSC_A4:113393-114041 | WT_5hasex | WT_veg | NOTEST | 0        | 0        | 0             | 0             | 1          | 1          | no  |
| AN5065 | ChrIII_A_nidulans_FGSC_A4:100672-101167 | WT_5hasex | WT_veg | NOTEST | 0,457599 | 0,223071 | -1,03658      | 0,126363      | 0,899445   | 1          | no  |
| AN5066 | ChrIII_A_nidulans_FGSC_A4:98288-99921   | WT_5hasex | WT_veg | NOTEST | 0,453422 | 0,653532 | 0,527404      | -0,255437     | 0,798386   | 1          | no  |
| AN5067 | ChrIII_A_nidulans_FGSC_A4:94650-97066   | WT_5hasex | WT_veg | OK     | 102,458  | 95,6902  | -0,098587     | 0,199619      | 0,841779   | 0,937457   | no  |
| AN5068 | ChrIII_A_nidulans_FGSC_A4:91202-93260   | WT_5hasex | WT_veg | OK     | 76,2313  | 44,5186  | -0,775975     | 1,53512       | 0,124753   | 0,335995   | no  |



## Supplementary table 1

|        |                                         |           |        |        |          |          |               |               |            |            |     |
|--------|-----------------------------------------|-----------|--------|--------|----------|----------|---------------|---------------|------------|------------|-----|
| AN5069 | ChrIII_A_nidulans_FGSC_A4:88537-90142   | WT_5hasex | WT_veg | OK     | 49,0297  | 22,7193  | -1,10974      | 2,08424       | 0,0371382  | 0,142771   | no  |
| AN5070 | ChrIII_A_nidulans_FGSC_A4:81391-83721   | WT_5hasex | WT_veg | OK     | 3,91612  | 4,8878   | 0,31976       | -0,473955     | 0,635532   | 0,833371   | no  |
| AN5071 | ChrIII_A_nidulans_FGSC_A4:78670-80283   | WT_5hasex | WT_veg | NOTEST | 0,163919 | 0,642213 | 1,97007       | -0,828734     | 0,407255   | 1          | no  |
| AN5072 | ChrIII_A_nidulans_FGSC_A4:77879-78363   | WT_5hasex | WT_veg | NOTEST | 0        | 0        | 0             | 0             | 1          | 1          | no  |
| AN5073 | ChrIII_A_nidulans_FGSC_A4:75971-76924   | WT_5hasex | WT_veg | NOTEST | 0,307671 | 0        | -1.79769e+308 | -1.79769e+308 | 0,224063   | 1          | no  |
| AN5074 | ChrIII_A_nidulans_FGSC_A4:74337-75165   | WT_5hasex | WT_veg | NOTEST | 0,254209 | 1,577    | 2,63309       | -1,18306      | 0,236787   | 1          | no  |
| AN5075 | ChrIII_A_nidulans_FGSC_A4:67559-71552   | WT_5hasex | WT_veg | OK     | 3,19652  | 1,58797  | -1,00932      | 1,29327       | 0,195916   | 0,448684   | no  |
| AN5076 | ChrIII_A_nidulans_FGSC_A4:65192-67241   | WT_5hasex | WT_veg | OK     | 4,22007  | 1,72634  | -1,28955      | 1,38676       | 0,165516   | 0,403938   | no  |
| AN5078 | ChrIII_A_nidulans_FGSC_A4:55480-56772   | WT_5hasex | WT_veg | OK     | 42,5301  | 67,3718  | 0,663661      | -1,30581      | 0,191618   | 0,442708   | no  |
| AN5079 | ChrIII_A_nidulans_FGSC_A4:54587-55197   | WT_5hasex | WT_veg | OK     | 586,132  | 1209,25  | 1,04482       | -1,9453       | 0,0517393  | 0,181816   | no  |
| AN5081 | ChrIII_A_nidulans_FGSC_A4:47150-48303   | WT_5hasex | WT_veg | OK     | 13,6869  | 28,5579  | 1,06109       | -1,71038      | 0,0871962  | 0,263382   | no  |
| AN5082 | ChrIII_A_nidulans_FGSC_A4:42803-44554   | WT_5hasex | WT_veg | OK     | 4,34691  | 29,5693  | 2,76604       | -3,66883      | 0,00024366 | 0,00236143 | yes |
| AN5083 | ChrIII_A_nidulans_FGSC_A4:39074-42183   | WT_5hasex | WT_veg | OK     | 5,78066  | 29,3216  | 2,34266       | -3,89341      | 9,8847E-05 | 0,001085   | yes |
| AN5087 | ChrIII_A_nidulans_FGSC_A4:26173-27606   | WT_5hasex | WT_veg | OK     | 6,14897  | 8,55446  | 0,476332      | -0,716601     | 0,473621   | 0,730476   | no  |
| AN5088 | ChrIII_A_nidulans_FGSC_A4:17663-22414   | WT_5hasex | WT_veg | OK     | 4,05329  | 2,0782   | -0,96376      | 1,533         | 0,125275   | 0,336753   | no  |
| AN5089 | ChrIII_A_nidulans_FGSC_A4:14734-15349   | WT_5hasex | WT_veg | OK     | 4,02448  | 7,40232  | 0,879174      | -1,0327       | 0,301745   | 0,577525   | no  |
| AN5090 | ChrIII_A_nidulans_FGSC_A4:13083-13908   | WT_5hasex | WT_veg | OK     | 205,988  | 743,131  | 1,85106       | -3,67355      | 0,00023921 | 0,00232386 | yes |
| AN5091 | ChrIII_A_nidulans_FGSC_A4:10123-11768   | WT_5hasex | WT_veg | NOTEST | 0,91944  | 2,48121  | 1,43222       | -1,3922       | 0,163861   | 1          | no  |
| AN5092 | ChrIII_A_nidulans_FGSC_A4:1859-7010     | WT_5hasex | WT_veg | OK     | 8,18511  | 1,37223  | -2,57648      | 4,32838       | 1,5021E-05 | 0,00020736 | yes |
| AN5093 | ChrIII_A_nidulans_FGSC_A4:18-1365       | WT_5hasex | WT_veg | OK     | 1,93247  | 1,04771  | -0,883211     | 0,712646      | 0,476065   | 0,732244   | no  |
| AN5095 | ChrV_A_nidulans_FGSC_A4:1137673-1138444 | WT_5hasex | WT_veg | OK     | 0,91382  | 7,77088  | 3,0881        | -2,98231      | 0,0028608  | 0,0187718  | yes |
| AN5098 | ChrV_A_nidulans_FGSC_A4:1152786-1154713 | WT_5hasex | WT_veg | OK     | 61,7262  | 100,809  | 0,707665      | -1,46923      | 0,14177    | 0,365297   | no  |
| AN5099 | ChrV_A_nidulans_FGSC_A4:1157104-1158715 | WT_5hasex | WT_veg | OK     | 170,179  | 225,407  | 0,405481      | -0,763865     | 0,444948   | 0,708442   | no  |
| AN5100 | ChrV_A_nidulans_FGSC_A4:1159411-1160962 | WT_5hasex | WT_veg | OK     | 302,065  | 486,983  | 0,689014      | -1,34565      | 0,178414   | 0,423733   | no  |
| AN5101 | ChrV_A_nidulans_FGSC_A4:1161452-1162653 | WT_5hasex | WT_veg | OK     | 7,68219  | 12,1858  | 0,665612      | -0,99223      | 0,321085   | 0,597441   | no  |
| AN5102 | ChrV_A_nidulans_FGSC_A4:1162965-1166371 | WT_5hasex | WT_veg | OK     | 65,7896  | 145,596  | 1,14604       | -2,33778      | 0,0193987  | 0,0869795  | no  |
| AN5103 | ChrV_A_nidulans_FGSC_A4:1166777-1168810 | WT_5hasex | WT_veg | OK     | 47,6993  | 145,102  | 1,60503       | -3,32677      | 0,00087859 | 0,00704294 | yes |
| AN5104 | ChrV_A_nidulans_FGSC_A4:1169957-1172921 | WT_5hasex | WT_veg | OK     | 59,1912  | 122,207  | 1,04587       | -2,00141      | 0,0453482  | 0,165529   | no  |
| AN5107 | ChrV_A_nidulans_FGSC_A4:1177488-1180014 | WT_5hasex | WT_veg | OK     | 56,9121  | 62,8901  | 0,144096      | -0,299865     | 0,76428    | 0,902888   | no  |
| AN5108 | ChrV_A_nidulans_FGSC_A4:1180214-1182942 | WT_5hasex | WT_veg | OK     | 20,3709  | 18,2503  | -0,158588     | 0,319222      | 0,749558   | 0,89556    | no  |
| AN5109 | ChrV_A_nidulans_FGSC_A4:1184058-1185054 | WT_5hasex | WT_veg | OK     | 6,89382  | 40,3415  | 2,54889       | -3,64665      | 0,00026568 | 0,00254559 | yes |
| AN5110 | ChrV_A_nidulans_FGSC_A4:1185650-1189819 | WT_5hasex | WT_veg | OK     | 22,858   | 95,197   | 2,05822       | -4,04091      | 5,3243E-05 | 0,00063238 | yes |
| AN5111 | ChrV_A_nidulans_FGSC_A4:1185650-1189819 | WT_5hasex | WT_veg | OK     | 188,806  | 354,972  | 0,910805      | -1,74275      | 0,0813767  | 0,250673   | no  |
| AN5112 | ChrV_A_nidulans_FGSC_A4:1192565-1194740 | WT_5hasex | WT_veg | OK     | 16,9916  | 37,8722  | 1,15632       | -2,28206      | 0,0224858  | 0,0972506  | no  |
| AN5113 | ChrV_A_nidulans_FGSC_A4:1195149-1196451 | WT_5hasex | WT_veg | OK     | 72,3149  | 111,765  | 0,628106      | -1,28012      | 0,200504   | 0,455188   | no  |
| AN5114 | ChrV_A_nidulans_FGSC_A4:1196649-1197920 | WT_5hasex | WT_veg | OK     | 19,1939  | 32,377   | 0,75432       | -1,37912      | 0,167857   | 0,407488   | no  |
| AN5115 | ChrV_A_nidulans_FGSC_A4:1199113-1200920 | WT_5hasex | WT_veg | OK     | 13,44    | 30,8761  | 1,19995       | -2,20736      | 0,0272891  | 0,112723   | no  |
| AN5116 | ChrV_A_nidulans_FGSC_A4:1201504-1202470 | WT_5hasex | WT_veg | OK     | 39,1779  | 82,88    | 1,08098       | -2,07939      | 0,0375816  | 0,144033   | no  |
| AN5117 | ChrV_A_nidulans_FGSC_A4:1209991-1210912 | WT_5hasex | WT_veg | OK     | 2,48134  | 5,39479  | 1,12045       | -1,12206      | 0,261835   | 0,532461   | no  |
| AN5118 | ChrV_A_nidulans_FGSC_A4:1212389-1213351 | WT_5hasex | WT_veg | OK     | 13,6839  | 36,3488  | 1,40943       | -2,27283      | 0,0230362  | 0,0991247  | no  |
| AN5119 | ChrV_A_nidulans_FGSC_A4:1213624-1214578 | WT_5hasex | WT_veg | OK     | 27,5502  | 61,1259  | 1,14972       | -2,03361      | 0,0419908  | 0,156256   | no  |
| AN5120 | ChrV_A_nidulans_FGSC_A4:1215099-1216014 | WT_5hasex | WT_veg | OK     | 4,61669  | 7,16333  | 0,633771      | -0,820785     | 0,411769   | 0,681668   | no  |
| AN5121 | ChrV_A_nidulans_FGSC_A4:1217648-1218845 | WT_5hasex | WT_veg | OK     | 199,341  | 293,675  | 0,558983      | -1,14059      | 0,254042   | 0,523324   | no  |
| AN5122 | ChrV_A_nidulans_FGSC_A4:1219339-1220562 | WT_5hasex | WT_veg | OK     | 230,495  | 217,696  | -0,0824211    | 0,16458       | 0,869275   | 0,950004   | no  |
| AN5123 | ChrV_A_nidulans_FGSC_A4:1220589-1221928 | WT_5hasex | WT_veg | OK     | 69,0569  | 132,319  | 0,938163      | -1,76662      | 0,0772921  | 0,24195    | no  |
| AN5124 | ChrV_A_nidulans_FGSC_A4:1222444-1224649 | WT_5hasex | WT_veg | OK     | 20,1601  | 13,1678  | -0,614493     | 1,18068       | 0,237728   | 0,503229   | no  |
| AN5125 | ChrV_A_nidulans_FGSC_A4:1225447-1226199 | WT_5hasex | WT_veg | OK     | 274,284  | 703,945  | 1,35979       | -2,81503      | 0,00487729 | 0,0291643  | yes |
| AN5126 | ChrV_A_nidulans_FGSC_A4:1226426-1229104 | WT_5hasex | WT_veg | OK     | 19,0052  | 48,7073  | 1,35774       | -2,72862      | 0,00636005 | 0,0362536  | yes |
| AN5127 | ChrV_A_nidulans_FGSC_A4:1230325-1231482 | WT_5hasex | WT_veg | OK     | 82,9994  | 114,066  | 0,4587        | -0,93152      | 0,351585   | 0,627163   | no  |
| AN5128 | ChrV_A_nidulans_FGSC_A4:1231691-1232502 | WT_5hasex | WT_veg | OK     | 251,27   | 654,454  | 1,38106       | -2,82549      | 0,00472077 | 0,0284179  | yes |
| AN5130 | ChrV_A_nidulans_FGSC_A4:1237124-1238717 | WT_5hasex | WT_veg | OK     | 1200,31  | 638,253  | -0,911214     | 1,41521       | 0,157007   | 0,390595   | no  |
| AN5132 | ChrV_A_nidulans_FGSC_A4:1240677-1241955 | WT_5hasex | WT_veg | OK     | 165,083  | 406,809  | 1,30116       | -2,4837       | 0,0130025  | 0,0640794  | no  |
| AN5133 | ChrV_A_nidulans_FGSC_A4:1242713-1244065 | WT_5hasex | WT_veg | OK     | 17,8401  | 25,1684  | 0,496486      | -0,908254     | 0,363744   | 0,638612   | no  |

## Supplementary table 1

|        |                                         |           |        |        |          |         |              |              |            |            |     |
|--------|-----------------------------------------|-----------|--------|--------|----------|---------|--------------|--------------|------------|------------|-----|
| AN5135 | ChrV_A_nidulans_FGSC_A4:1256738-1257779 | WT_5hasex | WT_veg | NOTEST | 1,43328  | 3,76901 | 1,39486      | -1,44661     | 0,148006   | 1          | no  |
| AN5136 | ChrV_A_nidulans_FGSC_A4:1258305-1258971 | WT_5hasex | WT_veg | OK     | 76,63    | 165,849 | 1,11389      | -2,2472      | 0,0246272  | 0,10415    | no  |
| AN5138 | ChrV_A_nidulans_FGSC_A4:1264244-1266133 | WT_5hasex | WT_veg | OK     | 2,33891  | 7,45849 | 1,68023      | -2,19357     | 0,0282661  | 0,115818   | no  |
| AN5140 | ChrV_A_nidulans_FGSC_A4:1270827-1272391 | WT_5hasex | WT_veg | OK     | 37,4445  | 63,0101 | 0,750827     | -1,48964     | 0,136319   | 0,356351   | no  |
| AN5141 | ChrV_A_nidulans_FGSC_A4:1273326-1274827 | WT_5hasex | WT_veg | OK     | 48,3381  | 111,875 | 1,21066      | -2,4595      | 0,0139129  | 0,0674693  | no  |
| AN5145 | ChrV_A_nidulans_FGSC_A4:1285606-1286537 | WT_5hasex | WT_veg | OK     | 376,083  | 136,444 | -1,46275     | 2,72055      | 0,00651726 | 0,0369928  | yes |
| AN5146 | ChrV_A_nidulans_FGSC_A4:1287151-1288863 | WT_5hasex | WT_veg | OK     | 67,2144  | 186,821 | 1,47482      | -3,04706     | 0,00231088 | 0,0157409  | yes |
| AN5148 | ChrV_A_nidulans_FGSC_A4:1293359-1294560 | WT_5hasex | WT_veg | OK     | 79,3234  | 146,288 | 0,882996     | -1,80876     | 0,0704884  | 0,226748   | no  |
| AN5149 | ChrV_A_nidulans_FGSC_A4:1295213-1296632 | WT_5hasex | WT_veg | OK     | 16,8215  | 38,4036 | 1,19093      | -1,95873     | 0,0501445  | 0,177883   | no  |
| AN5152 | ChrV_A_nidulans_FGSC_A4:1305119-1306816 | WT_5hasex | WT_veg | OK     | 75,0103  | 203,758 | 1,44169      | -2,97458     | 0,00293385 | 0,0191863  | yes |
| AN5153 | ChrV_A_nidulans_FGSC_A4:1307692-1308437 | WT_5hasex | WT_veg | OK     | 76,5717  | 187,198 | 1,28968      | -2,60248     | 0,00925525 | 0,0489794  | yes |
| AN5154 | ChrV_A_nidulans_FGSC_A4:1308849-1313446 | WT_5hasex | WT_veg | OK     | 29,7547  | 70,3219 | 1,24086      | -2,57771     | 0,00994574 | 0,0519204  | no  |
| AN5155 | ChrV_A_nidulans_FGSC_A4:1314078-1315842 | WT_5hasex | WT_veg | OK     | 18,6826  | 22,0641 | 0,240012     | -0,455693    | 0,648611   | 0,84078    | no  |
| AN5157 | ChrV_A_nidulans_FGSC_A4:1318730-1321830 | WT_5hasex | WT_veg | OK     | 40,3581  | 53,4246 | 0,404646     | -0,848644    | 0,396079   | 0,669203   | no  |
| AN5159 | ChrV_A_nidulans_FGSC_A4:1327025-1328914 | WT_5hasex | WT_veg | OK     | 49,9616  | 149,58  | 1,58203      | -3,0591      | 0,00222    | 0,0152447  | yes |
| AN5160 | ChrV_A_nidulans_FGSC_A4:1334504-1335630 | WT_5hasex | WT_veg | NOTEST | 0        | 1,46376 | 1.79769e+308 | 1.79769e+308 | 0,123323   | 1          | no  |
| AN5161 | ChrV_A_nidulans_FGSC_A4:1338926-1342239 | WT_5hasex | WT_veg | NOTEST | 1,52669  | 1,297   | -0,23523     | 0,282599     | 0,777484   | 1          | no  |
| AN5163 | ChrV_A_nidulans_FGSC_A4:1348086-1350172 | WT_5hasex | WT_veg | OK     | 6,13245  | 12,7642 | 1,05757      | -1,7718      | 0,0764284  | 0,239991   | no  |
| AN5164 | ChrV_A_nidulans_FGSC_A4:1350432-1352077 | WT_5hasex | WT_veg | OK     | 71,33    | 232,402 | 1,70404      | -3,52212     | 0,00042811 | 0,00381009 | yes |
| AN5166 | ChrV_A_nidulans_FGSC_A4:1355315-1357457 | WT_5hasex | WT_veg | OK     | 98,368   | 303,84  | 1,62705      | -3,3311      | 0,00086503 | 0,00695129 | yes |
| AN5167 | ChrV_A_nidulans_FGSC_A4:1365014-1368718 | WT_5hasex | WT_veg | OK     | 44,2628  | 66,4599 | 0,586391     | -1,22126     | 0,221986   | 0,4835     | no  |
| AN5168 | ChrV_A_nidulans_FGSC_A4:1369734-1374007 | WT_5hasex | WT_veg | OK     | 26,8698  | 60,0628 | 1,16049      | -2,17348     | 0,0297443  | 0,120584   | no  |
| AN5169 | ChrV_A_nidulans_FGSC_A4:1375596-1378128 | WT_5hasex | WT_veg | OK     | 30,1783  | 88,0156 | 1,54425      | -2,73736     | 0,00619341 | 0,0354464  | yes |
| AN5171 | ChrV_A_nidulans_FGSC_A4:1385780-1386422 | WT_5hasex | WT_veg | OK     | 9,79603  | 20,4955 | 1,06504      | -1,47084     | 0,141334   | 0,364729   | no  |
| AN5172 | ChrV_A_nidulans_FGSC_A4:1388927-1389729 | WT_5hasex | WT_veg | OK     | 44,3609  | 52,1125 | 0,232339     | -0,428868    | 0,668019   | 0,851473   | no  |
| AN5173 | ChrV_A_nidulans_FGSC_A4:1392161-1393917 | WT_5hasex | WT_veg | OK     | 2,73527  | 2,01637 | -0,439919    | 0,49453      | 0,620932   | 0,824947   | no  |
| AN5174 | ChrV_A_nidulans_FGSC_A4:1395265-1396400 | WT_5hasex | WT_veg | OK     | 23,5134  | 28,5203 | 0,278504     | -0,507702    | 0,611662   | 0,819782   | no  |
| AN5175 | ChrV_A_nidulans_FGSC_A4:1400978-1402508 | WT_5hasex | WT_veg | OK     | 19,4588  | 16,4055 | -0,246244    | 0,460197     | 0,645375   | 0,838847   | no  |
| AN5177 | ChrV_A_nidulans_FGSC_A4:1407212-1408520 | WT_5hasex | WT_veg | OK     | 17,7083  | 20,3703 | 0,202046     | -0,36227     | 0,717151   | 0,878779   | no  |
| AN5178 | ChrV_A_nidulans_FGSC_A4:1409030-1410221 | WT_5hasex | WT_veg | OK     | 10,0727  | 18,8064 | 0,900771     | -1,45308     | 0,146202   | 0,372884   | no  |
| AN5179 | ChrV_A_nidulans_FGSC_A4:1410386-1412305 | WT_5hasex | WT_veg | OK     | 10,7019  | 27,1797 | 1,34466      | -2,38607     | 0,0170295  | 0,0788629  | no  |
| AN5180 | ChrV_A_nidulans_FGSC_A4:1412715-1415361 | WT_5hasex | WT_veg | OK     | 27,4393  | 38,8646 | 0,502216     | -1,03506     | 0,300641   | 0,576358   | no  |
| AN5182 | ChrV_A_nidulans_FGSC_A4:1417064-1418563 | WT_5hasex | WT_veg | OK     | 2,84583  | 3,03303 | 0,091908     | -0,110047    | 0,912372   | 0,966779   | no  |
| AN5185 | ChrV_A_nidulans_FGSC_A4:1426221-1428688 | WT_5hasex | WT_veg | OK     | 31,3234  | 50,0693 | 0,676686     | -1,40349     | 0,16047    | 0,396038   | no  |
| AN5186 | ChrV_A_nidulans_FGSC_A4:1429284-1431855 | WT_5hasex | WT_veg | OK     | 16,6343  | 48,5311 | 1,54475      | -3,11502     | 0,00183931 | 0,0130143  | yes |
| AN5187 | ChrV_A_nidulans_FGSC_A4:1433061-1434866 | WT_5hasex | WT_veg | OK     | 24,2597  | 25,198  | 0,0547488    | -0,107308    | 0,914544   | 0,967462   | no  |
| AN5188 | ChrV_A_nidulans_FGSC_A4:1435239-1436981 | WT_5hasex | WT_veg | OK     | 21,762   | 40,0222 | 0,87899      | -1,69368     | 0,0903255  | 0,269823   | no  |
| AN5189 | ChrV_A_nidulans_FGSC_A4:1438309-1439513 | WT_5hasex | WT_veg | NOTEST | 0,205667 | 1,55938 | 2,9226       | -1,41543     | 0,156943   | 1          | no  |
| AN5190 | ChrV_A_nidulans_FGSC_A4:1440914-1443037 | WT_5hasex | WT_veg | NOTEST | 0        | 0       | 0            | 0            | 1          | 1          | no  |
| AN5191 | ChrV_A_nidulans_FGSC_A4:1443629-1444809 | WT_5hasex | WT_veg | OK     | 9,31455  | 4,5237  | -1,04198     | 1,48395      | 0,137821   | 0,358842   | no  |
| AN5193 | ChrV_A_nidulans_FGSC_A4:1448040-1449444 | WT_5hasex | WT_veg | OK     | 41,2484  | 67,6462 | 0,713671     | -1,40491     | 0,160049   | 0,395583   | no  |
| AN5194 | ChrV_A_nidulans_FGSC_A4:1450030-1453550 | WT_5hasex | WT_veg | OK     | 74,7589  | 91,0732 | 0,284781     | -0,581049    | 0,561207   | 0,789742   | no  |
| AN5195 | ChrV_A_nidulans_FGSC_A4:1453988-1454648 | WT_5hasex | WT_veg | OK     | 236,042  | 282,9   | 0,26125      | -0,539304    | 0,589677   | 0,806969   | no  |
| AN5196 | ChrV_A_nidulans_FGSC_A4:1455353-1457197 | WT_5hasex | WT_veg | OK     | 29,8833  | 95,612  | 1,67785      | -3,36871     | 0,0007552  | 0,00617666 | yes |
| AN5197 | ChrV_A_nidulans_FGSC_A4:1457352-1460709 | WT_5hasex | WT_veg | OK     | 14,4464  | 23,0182 | 0,672065     | -1,34182     | 0,179655   | 0,425695   | no  |
| AN5198 | ChrV_A_nidulans_FGSC_A4:1461024-1462941 | WT_5hasex | WT_veg | OK     | 30,1464  | 41,578  | 0,463837     | -0,923467    | 0,355764   | 0,631123   | no  |
| AN5199 | ChrV_A_nidulans_FGSC_A4:1463366-1464708 | WT_5hasex | WT_veg | OK     | 34,4602  | 95,5055 | 1,47065      | -2,82592     | 0,00471452 | 0,0283835  | yes |
| AN5200 | ChrV_A_nidulans_FGSC_A4:1465046-1467077 | WT_5hasex | WT_veg | OK     | 98,4345  | 69,9453 | -0,492936    | 0,917317     | 0,358976   | 0,633903   | no  |
| AN5201 | ChrV_A_nidulans_FGSC_A4:1468568-1469837 | WT_5hasex | WT_veg | OK     | 33,5391  | 20,6428 | -0,700207    | 1,26491      | 0,205902   | 0,462502   | no  |
| AN5202 | ChrV_A_nidulans_FGSC_A4:1471926-1472501 | WT_5hasex | WT_veg | OK     | 2,66901  | 3,14086 | 0,234856     | -0,210144    | 0,833555   | 0,933941   | no  |
| AN5203 | ChrV_A_nidulans_FGSC_A4:1475186-1475961 | WT_5hasex | WT_veg | OK     | 70,2318  | 285,289 | 2,02223      | -4,07351     | 4,631E-05  | 0,00055967 | yes |
| AN5204 | ChrV_A_nidulans_FGSC_A4:1476343-1478028 | WT_5hasex | WT_veg | OK     | 44,8236  | 163,03  | 1,86281      | -3,67908     | 0,00023408 | 0,00227951 | yes |
| AN5205 | ChrV_A_nidulans_FGSC_A4:1478952-1480889 | WT_5hasex | WT_veg | OK     | 22,7912  | 16,6944 | -0,449109    | 0,905015     | 0,365458   | 0,640363   | no  |

# Supplementary table 1

|        |                                         |           |        |        |           |          |               |               |            |            |     |
|--------|-----------------------------------------|-----------|--------|--------|-----------|----------|---------------|---------------|------------|------------|-----|
| AN5207 | ChrV_A_nidulans_FGSC_A4:1485150-1486231 | WT_5hasex | WT_veg | OK     | 151,228   | 950,438  | 2,65187       | -4,46736      | 7,9191E-06 | 0,00011683 | yes |
| AN5208 | ChrV_A_nidulans_FGSC_A4:1486932-1489467 | WT_5hasex | WT_veg | OK     | 61,4726   | 56,2766  | -0,12741      | 0,261186      | 0,793949   | 0,916198   | no  |
| AN5209 | ChrV_A_nidulans_FGSC_A4:1489962-1492761 | WT_5hasex | WT_veg | OK     | 141,212   | 306,531  | 1,11817       | -2,28858      | 0,022104   | 0,0960363  | no  |
| AN5211 | ChrV_A_nidulans_FGSC_A4:1496855-1504369 | WT_5hasex | WT_veg | OK     | 25,9122   | 47,8234  | 0,884084      | -1,78379      | 0,0744581  | 0,23533    | no  |
| AN5212 | ChrV_A_nidulans_FGSC_A4:1505088-1509600 | WT_5hasex | WT_veg | OK     | 9,08183   | 8,805    | -0,0446597    | 0,0882851     | 0,92965    | 0,973256   | no  |
| AN5213 | ChrV_A_nidulans_FGSC_A4:1510113-1511497 | WT_5hasex | WT_veg | OK     | 195,442   | 825,767  | 2,07899       | -4,00151      | 6,2939E-05 | 0,00073259 | yes |
| AN5214 | ChrV_A_nidulans_FGSC_A4:1513715-1514994 | WT_5hasex | WT_veg | OK     | 1,42604   | 4,96243  | 1,79903       | -1,87614      | 0,0606354  | 0,203839   | no  |
| AN5215 | ChrV_A_nidulans_FGSC_A4:1515893-1519337 | WT_5hasex | WT_veg | OK     | 9,06175   | 7,71831  | -0,231504     | 0,443433      | 0,657453   | 0,845658   | no  |
| AN5216 | ChrV_A_nidulans_FGSC_A4:1519644-1523070 | WT_5hasex | WT_veg | OK     | 11,545    | 15,0985  | 0,38714       | -0,774126     | 0,438856   | 0,703421   | no  |
| AN5218 | ChrV_A_nidulans_FGSC_A4:1528975-1530565 | WT_5hasex | WT_veg | OK     | 28,2808   | 24,7733  | -0,191036     | 0,355717      | 0,722052   | 0,881535   | no  |
| AN5219 | ChrV_A_nidulans_FGSC_A4:1531470-1532517 | WT_5hasex | WT_veg | OK     | 18,9537   | 48,0912  | 1,34329       | -2,12668      | 0,0334463  | 0,132007   | no  |
| AN5220 | ChrV_A_nidulans_FGSC_A4:1532845-1536102 | WT_5hasex | WT_veg | OK     | 36,3673   | 46,2123  | 0,345632      | -0,697301     | 0,485614   | 0,739492   | no  |
| AN5221 | ChrV_A_nidulans_FGSC_A4:1536226-1541194 | WT_5hasex | WT_veg | OK     | 16,4982   | 32,314   | 0,96985       | -1,96886      | 0,0489693  | 0,17509    | no  |
| AN5222 | ChrV_A_nidulans_FGSC_A4:1541493-1542748 | WT_5hasex | WT_veg | OK     | 1286,87   | 1981,6   | 0,622805      | -1,04959      | 0,293907   | 0,568713   | no  |
| AN5223 | ChrV_A_nidulans_FGSC_A4:1543016-1544992 | WT_5hasex | WT_veg | OK     | 3,73839   | 4,90307  | 0,391268      | -0,541328     | 0,588282   | 0,806059   | no  |
| AN5224 | ChrV_A_nidulans_FGSC_A4:1545756-1548066 | WT_5hasex | WT_veg | OK     | 27,0046   | 33,16    | 0,296242      | -0,590241     | 0,555029   | 0,785206   | no  |
| AN5225 | ChrV_A_nidulans_FGSC_A4:1548623-1551433 | WT_5hasex | WT_veg | OK     | 16,4418   | 26,019   | 0,662195      | -1,31793      | 0,187528   | 0,437138   | no  |
| AN5227 | ChrV_A_nidulans_FGSC_A4:1562719-1565483 | WT_5hasex | WT_veg | NOTEST | 0,83297   | 0,669061 | -0,316126     | 0,311464      | 0,755448   | 1          | no  |
| AN5228 | ChrV_A_nidulans_FGSC_A4:1566463-1568238 | WT_5hasex | WT_veg | OK     | 113,126   | 236,33   | 1,06286       | -1,9794       | 0,0477713  | 0,172167   | no  |
| AN5229 | ChrV_A_nidulans_FGSC_A4:1568337-1571178 | WT_5hasex | WT_veg | OK     | 4,49038   | 5,12476  | 0,190647      | -0,31231      | 0,754805   | 0,898244   | no  |
| AN5230 | ChrV_A_nidulans_FGSC_A4:1571509-1572493 | WT_5hasex | WT_veg | OK     | 23,1886   | 38,6939  | 0,738689      | -1,3311       | 0,183157   | 0,430876   | no  |
| AN5231 | ChrV_A_nidulans_FGSC_A4:1573138-1574251 | WT_5hasex | WT_veg | OK     | 44,0173   | 170,809  | 1,95624       | -3,79188      | 0,00014951 | 0,00155172 | yes |
| AN5232 | ChrV_A_nidulans_FGSC_A4:1574344-1575049 | WT_5hasex | WT_veg | OK     | 25,8143   | 45,9886  | 0,833107      | -1,45106      | 0,146764   | 0,373923   | no  |
| AN5233 | ChrV_A_nidulans_FGSC_A4:1577322-1579421 | WT_5hasex | WT_veg | OK     | 12,6737   | 26,5727  | 1,06811       | -1,80575      | 0,0709574  | 0,227684   | no  |
| AN5234 | ChrV_A_nidulans_FGSC_A4:1580106-1581855 | WT_5hasex | WT_veg | OK     | 32,1941   | 66,041   | 1,03657       | -2,04966      | 0,0403973  | 0,151913   | no  |
| AN5235 | ChrV_A_nidulans_FGSC_A4:1582040-1583505 | WT_5hasex | WT_veg | OK     | 22,4509   | 40,8072  | 0,86205       | -1,59047      | 0,11173    | 0,312342   | no  |
| AN5236 | ChrV_A_nidulans_FGSC_A4:1584032-1585459 | WT_5hasex | WT_veg | OK     | 79,11     | 212,157  | 1,4232        | -2,8934       | 0,00381097 | 0,0238582  | yes |
| AN5237 | ChrV_A_nidulans_FGSC_A4:1586748-1589291 | WT_5hasex | WT_veg | OK     | 15,5003   | 21,0717  | 0,443009      | -0,823329     | 0,410321   | 0,680281   | no  |
| AN5238 | ChrV_A_nidulans_FGSC_A4:1589983-1591696 | WT_5hasex | WT_veg | OK     | 18,4793   | 27,4848  | 0,572722      | -1,05904      | 0,289581   | 0,564315   | no  |
| AN5240 | ChrV_A_nidulans_FGSC_A4:1593316-1594120 | WT_5hasex | WT_veg | OK     | 1,17707   | 5,34184  | 2,18213       | -2,11309      | 0,034593   | 0,135534   | no  |
| AN5241 | ChrV_A_nidulans_FGSC_A4:1595957-1597204 | WT_5hasex | WT_veg | OK     | 7,81809   | 19,0395  | 1,28411       | -1,89779      | 0,0577235  | 0,196481   | no  |
| AN5244 | ChrV_A_nidulans_FGSC_A4:1611104-1612527 | WT_5hasex | WT_veg | NOTEST | 0,56298   | 0,197983 | -1,50771      | 0,633121      | 0,526655   | 1          | no  |
| AN5245 | ChrV_A_nidulans_FGSC_A4:1616225-1616721 | WT_5hasex | WT_veg | OK     | 377,065   | 1075,62  | 1,51228       | -2,77912      | 0,00545057 | 0,0318709  | yes |
| AN5248 | ChrV_A_nidulans_FGSC_A4:3388406-3391776 | WT_5hasex | WT_veg | NOTEST | 0,396479  | 0,464522 | 0,228503      | -0,182204     | 0,855423   | 1          | no  |
| AN5251 | ChrV_A_nidulans_FGSC_A4:3378056-3379614 | WT_5hasex | WT_veg | NOTEST | 1,04213   | 0,962448 | -0,114755     | 0,0913441     | 0,927219   | 1          | no  |
| AN5252 | ChrV_A_nidulans_FGSC_A4:3376951-3378010 | WT_5hasex | WT_veg | OK     | 21,1084   | 4,21853  | -2,323        | 2,67933       | 0,00737692 | 0,040833   | yes |
| AN5253 | ChrV_A_nidulans_FGSC_A4:3370442-3372538 | WT_5hasex | WT_veg | NOTEST | 0,0907772 | 0,846474 | 3,22106       | -1,90802      | 0,056389   | 1          | no  |
| AN5254 | ChrV_A_nidulans_FGSC_A4:3367155-3370373 | WT_5hasex | WT_veg | NOTEST | 0,988037  | 1,68806  | 0,77273       | -0,978538     | 0,327808   | 1          | no  |
| AN5255 | ChrV_A_nidulans_FGSC_A4:3365468-3365958 | WT_5hasex | WT_veg | OK     | 6,52611   | 5,58929  | -0,223559     | 0,218549      | 0,827001   | 0,931193   | no  |
| AN5257 | ChrV_A_nidulans_FGSC_A4:3355094-3356711 | WT_5hasex | WT_veg | OK     | 172,127   | 74,1532  | -1,21489      | 2,26522       | 0,0234992  | 0,100671   | no  |
| AN5258 | ChrV_A_nidulans_FGSC_A4:3351154-3352854 | WT_5hasex | WT_veg | OK     | 55,5325   | 26,5644  | -1,06384      | 1,92109       | 0,0547201  | 0,189218   | no  |
| AN5259 | ChrV_A_nidulans_FGSC_A4:3347679-3350690 | WT_5hasex | WT_veg | OK     | 1,69958   | 4,38563  | 1,36761       | -1,77729      | 0,07552    | 0,237967   | no  |
| AN5260 | ChrV_A_nidulans_FGSC_A4:3345363-3347130 | WT_5hasex | WT_veg | NOTEST | 0,462736  | 0,489151 | 0,0800905     | -0,0524674    | 0,958156   | 1          | no  |
| AN5262 | ChrV_A_nidulans_FGSC_A4:3342101-3343470 | WT_5hasex | WT_veg | OK     | 33,8464   | 130,352  | 1,94534       | -3,87658      | 0,00010593 | 0,00115384 | yes |
| AN5263 | ChrV_A_nidulans_FGSC_A4:3338209-3339666 | WT_5hasex | WT_veg | OK     | 11,6443   | 21,1682  | 0,862277      | -1,48559      | 0,137389   | 0,358181   | no  |
| AN5264 | ChrV_A_nidulans_FGSC_A4:3334668-3337258 | WT_5hasex | WT_veg | NOTEST | 0,580544  | 0        | -1.79769e+308 | -1.79769e+308 | 0,0573914  | 1          | no  |
| AN5268 | ChrV_A_nidulans_FGSC_A4:3318926-3319927 | WT_5hasex | WT_veg | OK     | 50,6894   | 106,777  | 1,07484       | -2,05931      | 0,039465   | 0,149393   | no  |
| AN5269 | ChrV_A_nidulans_FGSC_A4:3316531-3317678 | WT_5hasex | WT_veg | NOTEST | 0         | 0        | 0             | 0             | 1          | 1          | no  |
| AN5270 | ChrV_A_nidulans_FGSC_A4:3312498-3313989 | WT_5hasex | WT_veg | NOTEST | 0,17229   | 0        | -1.79769e+308 | -1.79769e+308 | 0,224063   | 1          | no  |
| AN5272 | ChrV_A_nidulans_FGSC_A4:3305377-3307306 | WT_5hasex | WT_veg | NOTEST | 0         | 0        | 0             | 0             | 1          | 1          | no  |
| AN5274 | ChrV_A_nidulans_FGSC_A4:3300701-3303011 | WT_5hasex | WT_veg | OK     | 2,00515   | 7,55324  | 1,91339       | -2,4469       | 0,0144093  | 0,0693556  | no  |
| AN5275 | ChrV_A_nidulans_FGSC_A4:3297972-3299812 | WT_5hasex | WT_veg | NOTEST | 0,873508  | 1,56832  | 0,844323      | -0,765924     | 0,443721   | 1          | no  |
| AN5276 | ChrV_A_nidulans_FGSC_A4:3295839-3297416 | WT_5hasex | WT_veg | OK     | 25,899    | 7,61716  | -1,76557      | 3,24089       | 0,00119158 | 0,00907578 | yes |

## Supplementary table 1

|        |                                         |           |        |        |          |          |               |               |            |            |     |
|--------|-----------------------------------------|-----------|--------|--------|----------|----------|---------------|---------------|------------|------------|-----|
| AN5278 | ChrV_A_nidulans_FGSC_A4:3288924-3294143 | WT_5hasex | WT_veg | OK     | 23,0714  | 31,7369  | 0,460053      | -0,959783     | 0,337164   | 0,613069   | no  |
| AN5279 | ChrV_A_nidulans_FGSC_A4:3286988-3288630 | WT_5hasex | WT_veg | OK     | 5,71281  | 12,8714  | 1,1719        | -1,81914      | 0,0688902  | 0,222935   | no  |
| AN5281 | ChrV_A_nidulans_FGSC_A4:3279507-3281749 | WT_5hasex | WT_veg | NOTEST | 0,095137 | 0,443564 | 2,22106       | -1,14626      | 0,251686   | 1          | no  |
| AN5283 | ChrV_A_nidulans_FGSC_A4:3271237-3272820 | WT_5hasex | WT_veg | OK     | 22,2045  | 25,9996  | 0,227637      | -0,431089     | 0,666404   | 0,850878   | no  |
| AN5284 | ChrV_A_nidulans_FGSC_A4:3266505-3268358 | WT_5hasex | WT_veg | NOTEST | 0,477362 | 0        | -1.79769e+308 | -1.79769e+308 | 0,0908325  | 1          | no  |
| AN5287 | ChrV_A_nidulans_FGSC_A4:3252105-3253176 | WT_5hasex | WT_veg | NOTEST | 0,236525 | 0,848789 | 1,84341       | -0,810885     | 0,417432   | 1          | no  |
| AN5288 | ChrV_A_nidulans_FGSC_A4:3251035-3251443 | WT_5hasex | WT_veg | NOTEST | 0        | 0        | 0             | 0             | 1          | 1          | no  |
| AN5289 | ChrV_A_nidulans_FGSC_A4:3249508-3250746 | WT_5hasex | WT_veg | NOTEST | 0,192541 | 0,703348 | 1,86907       | -0,822173     | 0,410979   | 1          | no  |
| AN5290 | ChrV_A_nidulans_FGSC_A4:3247888-3248413 | WT_5hasex | WT_veg | OK     | 2,32806  | 6,77549  | 1,5412        | -1,58804      | 0,112278   | 0,31324    | no  |
| AN5291 | ChrV_A_nidulans_FGSC_A4:3245192-3246878 | WT_5hasex | WT_veg | NOTEST | 0        | 0        | 0             | 0             | 1          | 1          | no  |
| AN5292 | ChrV_A_nidulans_FGSC_A4:3242982-3244359 | WT_5hasex | WT_veg | NOTEST | 0        | 0        | 0             | 0             | 1          | 1          | no  |
| AN5294 | ChrV_A_nidulans_FGSC_A4:3232968-3234915 | WT_5hasex | WT_veg | NOTEST | 0,351284 | 3,38282  | 3,26752       | -2,63034      | 0,00852986 | 1          | no  |
| AN5295 | ChrV_A_nidulans_FGSC_A4:3231814-3232648 | WT_5hasex | WT_veg | NOTEST | 1,18882  | 3,03439  | 1,35188       | -1,25878      | 0,208109   | 1          | no  |
| AN5297 | ChrV_A_nidulans_FGSC_A4:3227441-3228513 | WT_5hasex | WT_veg | OK     | 1,26234  | 4,17242  | 1,72479       | -1,65004      | 0,0989348  | 0,287137   | no  |
| AN5298 | ChrV_A_nidulans_FGSC_A4:3226347-3227154 | WT_5hasex | WT_veg | OK     | 0,656366 | 9,20433  | 3,80974       | -3,0102       | 0,00261072 | 0,0174121  | yes |
| AN5299 | ChrV_A_nidulans_FGSC_A4:3223303-3225760 | WT_5hasex | WT_veg | OK     | 2,36267  | 3,81589  | 0,691606      | -0,975843     | 0,329142   | 0,60565    | no  |
| AN5300 | ChrV_A_nidulans_FGSC_A4:3219603-3222312 | WT_5hasex | WT_veg | OK     | 2,08145  | 1,30978  | -0,668262     | 0,796596      | 0,425686   | 0,693135   | no  |
| AN5302 | ChrV_A_nidulans_FGSC_A4:3212589-3214758 | WT_5hasex | WT_veg | OK     | 17,66    | 149,788  | 3,08437       | -5,91358      | 3,3476E-09 | 1,0625E-07 | yes |
| AN5303 | ChrV_A_nidulans_FGSC_A4:3209239-3211303 | WT_5hasex | WT_veg | OK     | 7,2266   | 42,3617  | 2,55137       | -4,2217       | 2,4246E-05 | 0,00031622 | yes |
| AN5304 | ChrV_A_nidulans_FGSC_A4:3206785-3208672 | WT_5hasex | WT_veg | NOTEST | 0,414954 | 0        | -1.79769e+308 | -1.79769e+308 | 0,0793015  | 1          | no  |
| AN5305 | ChrV_A_nidulans_FGSC_A4:3204052-3206115 | WT_5hasex | WT_veg | NOTEST | 0,964129 | 1,97728  | 1,03622       | -1,18385      | 0,236473   | 1          | no  |
| AN5308 | ChrV_A_nidulans_FGSC_A4:3192905-3193928 | WT_5hasex | WT_veg | OK     | 2,22629  | 5,96357  | 1,42154       | -1,60105      | 0,109366   | 0,308119   | no  |
| AN5309 | ChrV_A_nidulans_FGSC_A4:3191753-3192737 | WT_5hasex | WT_veg | NOTEST | 0,510349 | 1,93948  | 1,92612       | -1,33243      | 0,182718   | 1          | no  |
| AN5310 | ChrV_A_nidulans_FGSC_A4:3189189-3190775 | WT_5hasex | WT_veg | OK     | 16,4905  | 9,05201  | -0,865324     | 1,50976       | 0,131104   | 0,347151   | no  |
| AN5311 | ChrV_A_nidulans_FGSC_A4:3186918-3188261 | WT_5hasex | WT_veg | OK     | 11,8539  | 32,8671  | 1,47128       | -2,3225       | 0,0202062  | 0,08985    | no  |
| AN5312 | ChrV_A_nidulans_FGSC_A4:3182643-3184088 | WT_5hasex | WT_veg | OK     | 11,1209  | 47,2265  | 2,08632       | -3,00308      | 0,00267264 | 0,0177483  | yes |
| AN5313 | ChrV_A_nidulans_FGSC_A4:3178196-3178692 | WT_5hasex | WT_veg | NOTEST | 0        | 0        | 0             | 0             | 1          | 1          | no  |
| AN5314 | ChrV_A_nidulans_FGSC_A4:3173198-3175207 | WT_5hasex | WT_veg | OK     | 1,24301  | 7,22593  | 2,53935       | -2,91887      | 0,00351308 | 0,0223305  | yes |
| AN5315 | ChrV_A_nidulans_FGSC_A4:3169807-3172424 | WT_5hasex | WT_veg | NOTEST | 0,625079 | 0,865504 | 0,469503      | -0,433434     | 0,664699   | 1          | no  |
| AN5316 | ChrV_A_nidulans_FGSC_A4:3168738-3169441 | WT_5hasex | WT_veg | NOTEST | 0        | 0        | 0             | 0             | 1          | 1          | no  |
| AN5317 | ChrV_A_nidulans_FGSC_A4:3167231-3168155 | WT_5hasex | WT_veg | OK     | 10,669   | 80,3387  | 2,91266       | -4,63154      | 3,6295E-06 | 5,8092E-05 | yes |
| AN5318 | ChrV_A_nidulans_FGSC_A4:3160321-3164516 | WT_5hasex | WT_veg | OK     | 50,1556  | 224,264  | 2,16072       | -4,03635      | 5,4288E-05 | 0,00064348 | yes |
| AN5319 | ChrV_A_nidulans_FGSC_A4:3155968-3157045 | WT_5hasex | WT_veg | NOTEST | 0,564664 | 0        | -1.79769e+308 | -1.79769e+308 | 0,0654719  | 1          | no  |
| AN5320 | ChrV_A_nidulans_FGSC_A4:3153805-3155494 | WT_5hasex | WT_veg | NOTEST | 0,740643 | 0        | -1.79769e+308 | -1.79769e+308 | 0,0399057  | 1          | no  |
| AN5321 | ChrV_A_nidulans_FGSC_A4:3151819-3153701 | WT_5hasex | WT_veg | OK     | 12,0267  | 20,8491  | 0,793753      | -1,39358      | 0,163444   | 0,400434   | no  |
| AN5322 | ChrV_A_nidulans_FGSC_A4:3151241-3151620 | WT_5hasex | WT_veg | OK     | 5,1049   | 0,663698 | -2,94328      | 0,978363      | 0,327895   | 0,604255   | no  |
| AN5323 | ChrV_A_nidulans_FGSC_A4:3147960-3150099 | WT_5hasex | WT_veg | OK     | 5,3487   | 30,1604  | 2,4954        | -3,88159      | 0,00010378 | 0,00113293 | yes |
| AN5324 | ChrV_A_nidulans_FGSC_A4:3144332-3146101 | WT_5hasex | WT_veg | OK     | 618,604  | 7603,8   | 3,61963       | -4,57623      | 4,7344E-06 | 7,3617E-05 | yes |
| AN5325 | ChrV_A_nidulans_FGSC_A4:3139538-3140785 | WT_5hasex | WT_veg | NOTEST | 0        | 1,25491  | 1.79769e+308  | 1.79769e+308  | 0,130982   | 1          | no  |
| AN5326 | ChrV_A_nidulans_FGSC_A4:3138216-3139392 | WT_5hasex | WT_veg | NOTEST | 0        | 0        | 0             | 0             | 1          | 1          | no  |
| AN5327 | ChrV_A_nidulans_FGSC_A4:3135760-3138056 | WT_5hasex | WT_veg | OK     | 7,59661  | 31,6336  | 2,05803       | -3,45936      | 0,00054147 | 0,00465682 | yes |
| AN5328 | ChrV_A_nidulans_FGSC_A4:3133385-3134667 | WT_5hasex | WT_veg | OK     | 2,01908  | 3,1967   | 0,662886      | -0,766224     | 0,443543   | 0,707283   | no  |
| AN5329 | ChrV_A_nidulans_FGSC_A4:3130527-3132058 | WT_5hasex | WT_veg | OK     | 62,7222  | 113,413  | 0,854544      | -1,37134      | 0,17027    | 0,411365   | no  |
| AN5330 | ChrV_A_nidulans_FGSC_A4:3129243-3129804 | WT_5hasex | WT_veg | OK     | 94,1724  | 347,91   | 1,88534       | -3,61079      | 0,00030527 | 0,00286419 | yes |
| AN5331 | ChrV_A_nidulans_FGSC_A4:3125558-3126908 | WT_5hasex | WT_veg | OK     | 12,6508  | 77,408   | 2,61326       | -3,77117      | 0,00016249 | 0,00166763 | yes |
| AN5332 | ChrV_A_nidulans_FGSC_A4:3121590-3122146 | WT_5hasex | WT_veg | OK     | 11,8009  | 294,354  | 4,64059       | -6,71396      | 1,8941E-11 | 8,5936E-10 | yes |
| AN5334 | ChrV_A_nidulans_FGSC_A4:3117636-3119303 | WT_5hasex | WT_veg | OK     | 13,2849  | 19,9608  | 0,587379      | -1,05307      | 0,29231    | 0,567087   | no  |
| AN5337 | ChrV_A_nidulans_FGSC_A4:3105147-3107798 | WT_5hasex | WT_veg | OK     | 23,5754  | 32,2745  | 0,453117      | -0,925275     | 0,354823   | 0,630421   | no  |
| AN5338 | ChrV_A_nidulans_FGSC_A4:3101828-3104555 | WT_5hasex | WT_veg | OK     | 135,24   | 743,534  | 2,45888       | -4,68641      | 2,7803E-06 | 4,5918E-05 | yes |
| AN5339 | ChrV_A_nidulans_FGSC_A4:3101828-3104555 | WT_5hasex | WT_veg | OK     | 136,997  | 811,252  | 2,566         | -4,97301      | 6,5923E-07 | 1,2672E-05 | yes |
| AN5340 | ChrV_A_nidulans_FGSC_A4:3100299-3101637 | WT_5hasex | WT_veg | OK     | 24,3849  | 221,655  | 3,18426       | -5,98375      | 2,1806E-09 | 7,1642E-08 | yes |
| AN5341 | ChrV_A_nidulans_FGSC_A4:3095988-3096511 | WT_5hasex | WT_veg | OK     | 76,2344  | 274,585  | 1,84874       | -3,5938       | 0,00032589 | 0,00302144 | yes |
| AN5342 | ChrV_A_nidulans_FGSC_A4:3093323-3095061 | WT_5hasex | WT_veg | OK     | 33,88    | 44,4394  | 0,391403      | -0,741402     | 0,45845    | 0,718899   | no  |

## Supplementary table 1

|        |                                         |           |        |        |          |          |               |               |            |            |     |
|--------|-----------------------------------------|-----------|--------|--------|----------|----------|---------------|---------------|------------|------------|-----|
| AN5345 | ChrV_A_nidulans_FGSC_A4:3084689-3086978 | WT_5hasex | WT_veg | OK     | 8,75209  | 12,9213  | 0,562049      | -0,963628     | 0,335232   | 0,611318   | no  |
| AN5346 | ChrV_A_nidulans_FGSC_A4:3083004-3084495 | WT_5hasex | WT_veg | OK     | 13,3996  | 16,6785  | 0,315804      | -0,541376     | 0,588249   | 0,806041   | no  |
| AN5347 | ChrV_A_nidulans_FGSC_A4:3079683-3082427 | WT_5hasex | WT_veg | OK     | 17,0728  | 11,066   | -0,625563     | 1,20235       | 0,229228   | 0,492377   | no  |
| AN5348 | ChrV_A_nidulans_FGSC_A4:3077324-3078566 | WT_5hasex | WT_veg | OK     | 9,92126  | 9,79868  | -0,0179357    | 0,0287526     | 0,977062   | 0,992075   | no  |
| AN5349 | ChrV_A_nidulans_FGSC_A4:3075826-3077088 | WT_5hasex | WT_veg | OK     | 15,3833  | 15,3237  | -0,00559898   | 0,00969758    | 0,992263   | 0,997325   | no  |
| AN5350 | ChrV_A_nidulans_FGSC_A4:3073948-3075758 | WT_5hasex | WT_veg | OK     | 9,87208  | 11,1141  | 0,170963      | -0,254806     | 0,798873   | 0,918884   | no  |
| AN5351 | ChrV_A_nidulans_FGSC_A4:3072511-3073694 | WT_5hasex | WT_veg | OK     | 66,5614  | 81,1897  | 0,286611      | -0,586003     | 0,557873   | 0,787354   | no  |
| AN5353 | ChrV_A_nidulans_FGSC_A4:3066496-3067268 | WT_5hasex | WT_veg | OK     | 20,2255  | 2,42057  | -3,06275      | 3,05845       | 0,00222489 | 0,0152703  | yes |
| AN5354 | ChrV_A_nidulans_FGSC_A4:3062082-3063230 | WT_5hasex | WT_veg | OK     | 6,60568  | 3,89572  | -0,761819     | 0,884185      | 0,376596   | 0,651236   | no  |
| AN5355 | ChrV_A_nidulans_FGSC_A4:3060028-3061179 | WT_5hasex | WT_veg | OK     | 14,3969  | 8,73701  | -0,720544     | 1,05813       | 0,289998   | 0,564651   | no  |
| AN5357 | ChrV_A_nidulans_FGSC_A4:3049707-3051297 | WT_5hasex | WT_veg | OK     | 763,344  | 3103,45  | 2,02347       | -3,40861      | 0,00065294 | 0,00546222 | yes |
| AN5359 | ChrV_A_nidulans_FGSC_A4:3047370-3048003 | WT_5hasex | WT_veg | OK     | 0,947821 | 8,11695  | 3,09825       | -2,96169      | 0,00305955 | 0,0198669  | yes |
| AN5361 | ChrV_A_nidulans_FGSC_A4:3041071-3043020 | WT_5hasex | WT_veg | NOTEST | 0,162004 | 0,423468 | 1,38622       | -0,763347     | 0,445257   | 1          | no  |
| AN5362 | ChrV_A_nidulans_FGSC_A4:3039945-3040479 | WT_5hasex | WT_veg | NOTEST | 0        | 0        | 0             | 0             | 1          | 1          | no  |
| AN5363 | ChrV_A_nidulans_FGSC_A4:3036915-3038460 | WT_5hasex | WT_veg | OK     | 3,29535  | 1,72261  | -0,935832     | 1,02955       | 0,303222   | 0,579198   | no  |
| AN5364 | ChrV_A_nidulans_FGSC_A4:3033261-3036651 | WT_5hasex | WT_veg | OK     | 8,11395  | 4,2284   | -0,940292     | 1,70812       | 0,0876149  | 0,264257   | no  |
| AN5365 | ChrV_A_nidulans_FGSC_A4:3031406-3032307 | WT_5hasex | WT_veg | OK     | 2,72751  | 1,07496  | -1,3433       | 0,886505      | 0,375346   | 0,650103   | no  |
| AN5366 | ChrV_A_nidulans_FGSC_A4:3030014-3030799 | WT_5hasex | WT_veg | NOTEST | 0        | 0        | 0             | 0             | 1          | 1          | no  |
| AN5367 | ChrV_A_nidulans_FGSC_A4:3027166-3029176 | WT_5hasex | WT_veg | NOTEST | 0,720567 | 1,16068  | 0,687772      | -0,676481     | 0,498735   | 1          | no  |
| AN5368 | ChrV_A_nidulans_FGSC_A4:3025515-3026301 | WT_5hasex | WT_veg | OK     | 21,9494  | 12,0022  | -0,87088      | 1,26275       | 0,206679   | 0,463617   | no  |
| AN5369 | ChrV_A_nidulans_FGSC_A4:3023275-3024920 | WT_5hasex | WT_veg | NOTEST | 0        | 0        | 0             | 0             | 1          | 1          | no  |
| AN5370 | ChrV_A_nidulans_FGSC_A4:3019069-3021351 | WT_5hasex | WT_veg | OK     | 21,7855  | 1,27754  | -4,09192      | 4,74003       | 2,1369E-06 | 3,6486E-05 | yes |
| AN5371 | ChrV_A_nidulans_FGSC_A4:3016447-3017431 | WT_5hasex | WT_veg | NOTEST | 1,15821  | 2,53804  | 1,13182       | -1,0687       | 0,285204   | 1          | no  |
| AN5372 | ChrV_A_nidulans_FGSC_A4:3014203-3015185 | WT_5hasex | WT_veg | OK     | 178,89   | 457,013  | 1,35317       | -2,41421      | 0,0157694  | 0,0743588  | no  |
| AN5373 | ChrV_A_nidulans_FGSC_A4:3012188-3013203 | WT_5hasex | WT_veg | OK     | 31,0376  | 96,9111  | 1,64264       | -2,90122      | 0,00371707 | 0,0233804  | yes |
| AN5374 | ChrV_A_nidulans_FGSC_A4:3010111-3011299 | WT_5hasex | WT_veg | OK     | 4,81494  | 2,92663  | -0,718276     | 0,874331      | 0,381938   | 0,656065   | no  |
| AN5375 | ChrV_A_nidulans_FGSC_A4:3008962-3009916 | WT_5hasex | WT_veg | OK     | 19,6058  | 30,4635  | 0,635799      | -1,11273      | 0,265823   | 0,537224   | no  |
| AN5376 | ChrV_A_nidulans_FGSC_A4:3006886-3008564 | WT_5hasex | WT_veg | OK     | 43,3397  | 74,2115  | 0,775955      | -1,56651      | 0,11723    | 0,322506   | no  |
| AN5377 | ChrV_A_nidulans_FGSC_A4:3003076-3003883 | WT_5hasex | WT_veg | NOTEST | 0        | 0        | 0             | 0             | 1          | 1          | no  |
| AN5378 | ChrV_A_nidulans_FGSC_A4:2998826-3001368 | WT_5hasex | WT_veg | OK     | 17,3954  | 4,50724  | -1,94839      | 3,3571        | 0,00078766 | 0,00640814 | yes |
| AN5380 | ChrV_A_nidulans_FGSC_A4:2990645-2992213 | WT_5hasex | WT_veg | NOTEST | 0        | 0        | 0             | 0             | 1          | 1          | no  |
| AN5381 | ChrV_A_nidulans_FGSC_A4:2989074-2990219 | WT_5hasex | WT_veg | OK     | 2,95749  | 7,92604  | 1,42223       | -1,58089      | 0,113903   | 0,316476   | no  |
| AN5383 | ChrV_A_nidulans_FGSC_A4:2985636-2988446 | WT_5hasex | WT_veg | NOTEST | 0,920653 | 1,06565  | 0,211006      | -0,200182     | 0,841338   | 1          | no  |
| AN5384 | ChrV_A_nidulans_FGSC_A4:2983705-2984618 | WT_5hasex | WT_veg | NOTEST | 0        | 0        | 0             | 0             | 1          | 1          | no  |
| AN5385 | ChrV_A_nidulans_FGSC_A4:2980922-2981759 | WT_5hasex | WT_veg | NOTEST | 1,14595  | 1,51349  | 0,401332      | -0,300919     | 0,763476   | 1          | no  |
| AN5387 | ChrV_A_nidulans_FGSC_A4:2973005-2974166 | WT_5hasex | WT_veg | OK     | 15,9021  | 22,1192  | 0,476078      | -0,812405     | 0,416559   | 0,685505   | no  |
| AN5388 | ChrV_A_nidulans_FGSC_A4:2971231-2971766 | WT_5hasex | WT_veg | NOTEST | 0        | 0        | 0             | 0             | 1          | 1          | no  |
| AN5389 | ChrV_A_nidulans_FGSC_A4:2969697-2970141 | WT_5hasex | WT_veg | NOTEST | 0        | 0        | 0             | 0             | 1          | 1          | no  |
| AN5390 | ChrV_A_nidulans_FGSC_A4:2964964-2967726 | WT_5hasex | WT_veg | OK     | 18,2889  | 38,3685  | 1,06896       | -2,08657      | 0,0369266  | 0,142167   | no  |
| AN5391 | ChrV_A_nidulans_FGSC_A4:2963806-2964553 | WT_5hasex | WT_veg | OK     | 7,87891  | 23,5618  | 1,58038       | -2,31671      | 0,0205198  | 0,0909403  | no  |
| AN5393 | ChrV_A_nidulans_FGSC_A4:2958291-2958957 | WT_5hasex | WT_veg | NOTEST | 0        | 0        | 0             | 0             | 1          | 1          | no  |
| AN5394 | ChrV_A_nidulans_FGSC_A4:2956462-2958070 | WT_5hasex | WT_veg | NOTEST | 0,702573 | 1,74156  | 1,30966       | -1,25458      | 0,209631   | 1          | no  |
| AN5395 | ChrV_A_nidulans_FGSC_A4:2953076-2955743 | WT_5hasex | WT_veg | OK     | 5,8548   | 1,54937  | -1,91794      | 2,66388       | 0,00772456 | 0,04239    | yes |
| AN5396 | ChrV_A_nidulans_FGSC_A4:2947330-2948117 | WT_5hasex | WT_veg | NOTEST | 0,743571 | 3,63947  | 2,29118       | -1,72314      | 0,0848634  | 1          | no  |
| AN5398 | ChrV_A_nidulans_FGSC_A4:2942226-2943357 | WT_5hasex | WT_veg | NOTEST | 0,389734 | 0        | -1.79769e+308 | -1.79769e+308 | 0,133588   | 1          | no  |
| AN5399 | ChrV_A_nidulans_FGSC_A4:2938045-2938996 | WT_5hasex | WT_veg | OK     | 8,69455  | 31,5905  | 1,86131       | -2,88776      | 0,00388    | 0,0241874  | yes |
| AN5400 | ChrV_A_nidulans_FGSC_A4:2933382-2935524 | WT_5hasex | WT_veg | OK     | 5,56388  | 16,108   | 1,53361       | -2,11184      | 0,0347004  | 0,135851   | no  |
| AN5401 | ChrV_A_nidulans_FGSC_A4:2929160-2929721 | WT_5hasex | WT_veg | OK     | 3,42762  | 24,2712  | 2,82397       | -3,2795       | 0,00103992 | 0,00811646 | yes |
| AN5402 | ChrV_A_nidulans_FGSC_A4:2925188-2926473 | WT_5hasex | WT_veg | OK     | 31,632   | 86,7278  | 1,45511       | -2,73984      | 0,00614699 | 0,0352269  | yes |
| AN5403 | ChrV_A_nidulans_FGSC_A4:2919608-2923615 | WT_5hasex | WT_veg | OK     | 30,2769  | 53,0103  | 0,808055      | -1,68184      | 0,0926003  | 0,274475   | no  |
| AN5404 | ChrV_A_nidulans_FGSC_A4:2916666-2918400 | WT_5hasex | WT_veg | OK     | 207,547  | 618,504  | 1,57535       | -3,16089      | 0,00157286 | 0,0114316  | yes |
| AN5405 | ChrV_A_nidulans_FGSC_A4:2911385-2913385 | WT_5hasex | WT_veg | OK     | 2,08768  | 6,27782  | 1,58837       | -2,18506      | 0,0288841  | 0,117734   | no  |
| AN5407 | ChrV_A_nidulans_FGSC_A4:2900520-2903370 | WT_5hasex | WT_veg | OK     | 17,0681  | 29,8053  | 0,804272      | -1,61351      | 0,106635   | 0,303031   | no  |

## Supplementary table 1

|        |                                         |           |        |        |          |          |               |               |            |            |     |
|--------|-----------------------------------------|-----------|--------|--------|----------|----------|---------------|---------------|------------|------------|-----|
| AN5408 | ChrV_A_nidulans_FGSC_A4:2898526-2899041 | WT_5hasex | WT_veg | OK     | 39,5553  | 47,7092  | 0,270396      | -0,394875     | 0,692935   | 0,865448   | no  |
| AN5409 | ChrV_A_nidulans_FGSC_A4:2896738-2897776 | WT_5hasex | WT_veg | OK     | 3,36771  | 13,8837  | 2,04356       | -2,65948      | 0,00782616 | 0,042831   | yes |
| AN5410 | ChrV_A_nidulans_FGSC_A4:2893953-2894568 | WT_5hasex | WT_veg | OK     | 62,7183  | 39,6183  | -0,662718     | 1,08367       | 0,27851    | 0,551735   | no  |
| AN5411 | ChrV_A_nidulans_FGSC_A4:2892084-2892883 | WT_5hasex | WT_veg | OK     | 4,04996  | 1,43194  | -1,49993      | 1,20231       | 0,229242   | 0,492386   | no  |
| AN5412 | ChrV_A_nidulans_FGSC_A4:2889982-2891595 | WT_5hasex | WT_veg | OK     | 4,91719  | 6,23859  | 0,343386      | -0,499303     | 0,617566   | 0,823291   | no  |
| AN5413 | ChrV_A_nidulans_FGSC_A4:2887427-2889653 | WT_5hasex | WT_veg | OK     | 3,16357  | 9,74335  | 1,62287       | -2,20273      | 0,0276139  | 0,113786   | no  |
| AN5414 | ChrV_A_nidulans_FGSC_A4:2885283-2886501 | WT_5hasex | WT_veg | OK     | 35,6145  | 57,6309  | 0,694376      | -1,34899      | 0,177341   | 0,422353   | no  |
| AN5415 | ChrV_A_nidulans_FGSC_A4:2883056-2884556 | WT_5hasex | WT_veg | OK     | 36,8048  | 79,4778  | 1,11066       | -2,19289      | 0,0283154  | 0,115939   | no  |
| AN5416 | ChrV_A_nidulans_FGSC_A4:2880934-2882063 | WT_5hasex | WT_veg | OK     | 48,9973  | 65,6631  | 0,422379      | -0,814365     | 0,415436   | 0,684474   | no  |
| AN5417 | ChrV_A_nidulans_FGSC_A4:2878531-2880456 | WT_5hasex | WT_veg | NOTEST | 0,264253 | 0,454744 | 0,783132      | -0,459301     | 0,646018   | 1          | no  |
| AN5418 | ChrV_A_nidulans_FGSC_A4:2875694-2876475 | WT_5hasex | WT_veg | NOTEST | 0        | 0        | 0             | 0             | 1          | 1          | no  |
| AN5419 | ChrV_A_nidulans_FGSC_A4:2874263-2875488 | WT_5hasex | WT_veg | NOTEST | 0,209913 | 1,03078  | 2,29587       | -1,07865      | 0,280743   | 1          | no  |
| AN5421 | ChrV_A_nidulans_FGSC_A4:2865556-2867600 | WT_5hasex | WT_veg | OK     | 8,86917  | 20,3428  | 1,19765       | -1,72125      | 0,0852062  | 0,259157   | no  |
| AN5422 | ChrV_A_nidulans_FGSC_A4:2863213-2864708 | WT_5hasex | WT_veg | OK     | 9,48485  | 28,2365  | 1,57386       | -2,25659      | 0,0240338  | 0,102354   | no  |
| AN5423 | ChrV_A_nidulans_FGSC_A4:2859850-2861210 | WT_5hasex | WT_veg | OK     | 71,5634  | 192,13   | 1,42479       | -2,85785      | 0,0042652  | 0,0261716  | yes |
| AN5424 | ChrV_A_nidulans_FGSC_A4:2856495-2857421 | WT_5hasex | WT_veg | OK     | 6,45908  | 1,5316   | -2,07629      | 1,64816       | 0,0993192  | 0,287941   | no  |
| AN5425 | ChrV_A_nidulans_FGSC_A4:2854872-2856066 | WT_5hasex | WT_veg | NOTEST | 0        | 0        | 0             | 0             | 1          | 1          | no  |
| AN5426 | ChrV_A_nidulans_FGSC_A4:2853193-2854286 | WT_5hasex | WT_veg | NOTEST | 0,23207  | 0        | -1.79769e+308 | -1.79769e+308 | 0,224063   | 1          | no  |
| AN5427 | ChrV_A_nidulans_FGSC_A4:2849337-2851138 | WT_5hasex | WT_veg | NOTEST | 0,133841 | 0        | -1.79769e+308 | -1.79769e+308 | 0,23809    | 1          | no  |
| AN5428 | ChrV_A_nidulans_FGSC_A4:2845478-2846360 | WT_5hasex | WT_veg | OK     | 7,00878  | 27,7709  | 1,98634       | -2,84253      | 0,00447573 | 0,0272369  | yes |
| AN5429 | ChrV_A_nidulans_FGSC_A4:2841696-2843499 | WT_5hasex | WT_veg | OK     | 3,22304  | 0,783249 | -2,04088      | 1,93771       | 0,0526589  | 0,183962   | no  |
| AN5430 | ChrV_A_nidulans_FGSC_A4:2839700-2841074 | WT_5hasex | WT_veg | NOTEST | 0,579362 | 0        | -1.79769e+308 | -1.79769e+308 | 0,0540986  | 1          | no  |
| AN5431 | ChrV_A_nidulans_FGSC_A4:2835552-2837415 | WT_5hasex | WT_veg | NOTEST | 0,593253 | 2,45773  | 2,05061       | -2,15503      | 0,0311593  | 1          | no  |
| AN5432 | ChrV_A_nidulans_FGSC_A4:2834112-2835142 | WT_5hasex | WT_veg | OK     | 0,414177 | 6,70232  | 4,01634       | -3,10334      | 0,0019135  | 0,0134502  | yes |
| AN5434 | ChrV_A_nidulans_FGSC_A4:2828863-2830299 | WT_5hasex | WT_veg | OK     | 8,78669  | 22,5632  | 1,36058       | -1,97726      | 0,0480118  | 0,17269    | no  |
| AN5435 | ChrV_A_nidulans_FGSC_A4:2826312-2828526 | WT_5hasex | WT_veg | OK     | 46,9446  | 19,0417  | -1,3018       | 2,49557       | 0,0125754  | 0,0624444  | no  |
| AN5437 | ChrV_A_nidulans_FGSC_A4:2814273-2815927 | WT_5hasex | WT_veg | OK     | 27,5605  | 43,3192  | 0,652406      | -1,06927      | 0,284946   | 0,55897    | no  |
| AN5438 | ChrV_A_nidulans_FGSC_A4:2811026-2812812 | WT_5hasex | WT_veg | OK     | 12,2491  | 25,0382  | 1,03146       | -1,83638      | 0,0663009  | 0,216891   | no  |
| AN5439 | ChrV_A_nidulans_FGSC_A4:2810197-2810644 | WT_5hasex | WT_veg | OK     | 4,32917  | 6,56705  | 0,601153      | -0,64222      | 0,520731   | 0,764054   | no  |
| AN5440 | ChrV_A_nidulans_FGSC_A4:2808736-2809738 | WT_5hasex | WT_veg | OK     | 17,6932  | 30,9313  | 0,805876      | -1,37826      | 0,168124   | 0,40791    | no  |
| AN5441 | ChrV_A_nidulans_FGSC_A4:2805676-2806733 | WT_5hasex | WT_veg | OK     | 2050,89  | 3485,93  | 0,765295      | -1,24047      | 0,214802   | 0,474419   | no  |
| AN5443 | ChrV_A_nidulans_FGSC_A4:2801576-2802608 | WT_5hasex | WT_veg | OK     | 22,6795  | 114,665  | 2,33796       | -4,33705      | 1,4441E-05 | 0,00019995 | yes |
| AN5444 | ChrV_A_nidulans_FGSC_A4:2799910-2801319 | WT_5hasex | WT_veg | OK     | 117,872  | 224,335  | 0,928436      | -1,79711      | 0,0723183  | 0,230764   | no  |
| AN5445 | ChrV_A_nidulans_FGSC_A4:2796502-2797192 | WT_5hasex | WT_veg | OK     | 47,9069  | 130,37   | 1,44431       | -2,70605      | 0,00680891 | 0,0383147  | yes |
| AN5446 | ChrV_A_nidulans_FGSC_A4:2791106-2793849 | WT_5hasex | WT_veg | OK     | 54,6003  | 84,9903  | 0,638389      | -1,32651      | 0,184669   | 0,433143   | no  |
| AN5447 | ChrV_A_nidulans_FGSC_A4:2788634-2790606 | WT_5hasex | WT_veg | OK     | 959,198  | 500,526  | -0,938384     | 1,5172        | 0,129217   | 0,343887   | no  |
| AN5448 | ChrV_A_nidulans_FGSC_A4:2785792-2788388 | WT_5hasex | WT_veg | OK     | 39,7031  | 51,0461  | 0,362548      | -0,741244     | 0,458545   | 0,718921   | no  |
| AN5449 | ChrV_A_nidulans_FGSC_A4:2782306-2784496 | WT_5hasex | WT_veg | OK     | 19,5845  | 18,801   | -0,058905     | 0,117109      | 0,906774   | 0,96425    | no  |
| AN5450 | ChrV_A_nidulans_FGSC_A4:2777517-2780101 | WT_5hasex | WT_veg | OK     | 50,8121  | 175,516  | 1,78836       | -3,46609      | 0,00052808 | 0,00455662 | yes |
| AN5451 | ChrV_A_nidulans_FGSC_A4:2774838-2776603 | WT_5hasex | WT_veg | OK     | 192,552  | 466,825  | 1,27763       | -2,51623      | 0,0118618  | 0,0596148  | no  |
| AN5452 | ChrV_A_nidulans_FGSC_A4:2770207-2774532 | WT_5hasex | WT_veg | OK     | 53,8036  | 143,767  | 1,41796       | -2,85924      | 0,00426659 | 0,0260667  | yes |
| AN5453 | ChrV_A_nidulans_FGSC_A4:2764464-2766136 | WT_5hasex | WT_veg | OK     | 16,4899  | 37,0631  | 1,1684        | -1,98813      | 0,046797   | 0,169519   | no  |
| AN5454 | ChrV_A_nidulans_FGSC_A4:2762292-2764058 | WT_5hasex | WT_veg | NOTEST | 0,126152 | 1,7645   | 3,80603       | -2,35775      | 0,018386   | 1          | no  |
| AN5455 | ChrV_A_nidulans_FGSC_A4:2756303-2761897 | WT_5hasex | WT_veg | OK     | 8,70767  | 38,2882  | 2,13654       | -4,28075      | 1,8627E-05 | 0,00025098 | yes |
| AN5456 | ChrV_A_nidulans_FGSC_A4:2752408-2756052 | WT_5hasex | WT_veg | OK     | 12,9647  | 15,7371  | 0,279586      | -0,556786     | 0,577674   | 0,799606   | no  |
| AN5458 | ChrV_A_nidulans_FGSC_A4:2747085-2747639 | WT_5hasex | WT_veg | OK     | 21,4683  | 35,8549  | 0,739965      | -1,04275      | 0,297066   | 0,572319   | no  |
| AN5459 | ChrV_A_nidulans_FGSC_A4:2745495-2746048 | WT_5hasex | WT_veg | NOTEST | 0,641669 | 0,514075 | -0,319852     | 0,0920595     | 0,926651   | 1          | no  |
| AN5460 | ChrV_A_nidulans_FGSC_A4:2740819-2743062 | WT_5hasex | WT_veg | NOTEST | 0        | 0        | 0             | 0             | 1          | 1          | no  |
| AN5461 | ChrV_A_nidulans_FGSC_A4:2737643-2738843 | WT_5hasex | WT_veg | OK     | 4,07062  | 9,64895  | 1,24512       | -1,73352      | 0,083004   | 0,254406   | no  |
| AN5462 | ChrV_A_nidulans_FGSC_A4:2735496-2736143 | WT_5hasex | WT_veg | NOTEST | 0        | 0        | 0             | 0             | 1          | 1          | no  |
| AN5463 | ChrV_A_nidulans_FGSC_A4:2732482-2733699 | WT_5hasex | WT_veg | NOTEST | 0,647928 | 0        | -1.79769e+308 | -1.79769e+308 | 0,0537957  | 1          | no  |
| AN5464 | ChrV_A_nidulans_FGSC_A4:2724064-2725871 | WT_5hasex | WT_veg | OK     | 2,87029  | 6,08195  | 1,08334       | -1,46521      | 0,142865   | 0,367376   | no  |
| AN5465 | ChrV_A_nidulans_FGSC_A4:2721154-2723292 | WT_5hasex | WT_veg | OK     | 3,23341  | 0,867266 | -1,89851      | 2,04831       | 0,0405297  | 0,152268   | no  |

## Supplementary table 1

|        |                                         |           |        |        |          |          |               |               |            |            |     |
|--------|-----------------------------------------|-----------|--------|--------|----------|----------|---------------|---------------|------------|------------|-----|
| AN5466 | ChrV_A_nidulans_FGSC_A4:2716182-2718772 | WT_5hasex | WT_veg | NOTEST | 0,113969 | 0        | -1.79769e+308 | -1.79769e+308 | 0,165569   | 1          | no  |
| AN5467 | ChrV_A_nidulans_FGSC_A4:2710874-2712355 | WT_5hasex | WT_veg | OK     | 18,6075  | 21,6971  | 0,221614      | -0,370026     | 0,711363   | 0,876014   | no  |
| AN5468 | ChrV_A_nidulans_FGSC_A4:2709749-2710225 | WT_5hasex | WT_veg | OK     | 10,6212  | 64,8845  | 2,61093       | -3,68481      | 0,00022887 | 0,00223756 | yes |
| AN5470 | ChrV_A_nidulans_FGSC_A4:2703651-2705478 | WT_5hasex | WT_veg | OK     | 3,12428  | 4,3514   | 0,477953      | -0,667197     | 0,504647   | 0,752807   | no  |
| AN5471 | ChrV_A_nidulans_FGSC_A4:2702320-2703359 | WT_5hasex | WT_veg | OK     | 3,09537  | 3,12678  | 0,0145688     | -0,0155844    | 0,987566   | 0,995529   | no  |
| AN5474 | ChrV_A_nidulans_FGSC_A4:2691654-2692454 | WT_5hasex | WT_veg | NOTEST | 0,53029  | 2,09109  | 1,9794        | -0,870705     | 0,383915   | 1          | no  |
| AN5475 | ChrV_A_nidulans_FGSC_A4:2685267-2686508 | WT_5hasex | WT_veg | NOTEST | 0,267086 | 0        | -1.79769e+308 | -1.79769e+308 | 0,165569   | 1          | no  |
| AN5476 | ChrV_A_nidulans_FGSC_A4:2683542-2684574 | WT_5hasex | WT_veg | NOTEST | 0        | 0        | 0             | 0             | 1          | 1          | no  |
| AN5477 | ChrV_A_nidulans_FGSC_A4:2681203-2682657 | WT_5hasex | WT_veg | NOTEST | 1,88421  | 1,13089  | -0,736498     | 0,501868      | 0,61576    | 1          | no  |
| AN5479 | ChrV_A_nidulans_FGSC_A4:2675701-2677071 | WT_5hasex | WT_veg | OK     | 12,7632  | 23,0335  | 0,851739      | -1,48409      | 0,137786   | 0,358789   | no  |
| AN5480 | ChrV_A_nidulans_FGSC_A4:2674776-2675589 | WT_5hasex | WT_veg | OK     | 2185,49  | 15696,9  | 2,84445       | -3,54852      | 0,00038741 | 0,00349594 | yes |
| AN5481 | ChrV_A_nidulans_FGSC_A4:2671331-2674127 | WT_5hasex | WT_veg | OK     | 4,98463  | 17,0175  | 1,77146       | -2,91696      | 0,00353465 | 0,0224363  | yes |
| AN5483 | ChrV_A_nidulans_FGSC_A4:2663262-2666935 | WT_5hasex | WT_veg | OK     | 15,4098  | 52,2958  | 1,76285       | -3,59253      | 0,00032748 | 0,00303388 | yes |
| AN5484 | ChrV_A_nidulans_FGSC_A4:2660600-2661170 | WT_5hasex | WT_veg | OK     | 160,676  | 325,999  | 1,02071       | -1,94447      | 0,0518385  | 0,182031   | no  |
| AN5487 | ChrV_A_nidulans_FGSC_A4:2648417-2649492 | WT_5hasex | WT_veg | OK     | 10,746   | 7,9365   | -0,437226     | 0,550575      | 0,581925   | 0,802296   | no  |
| AN5488 | ChrV_A_nidulans_FGSC_A4:2639514-2646010 | WT_5hasex | WT_veg | OK     | 16,056   | 46,2629  | 1,52675       | -3,16712      | 0,00153958 | 0,011227   | yes |
| AN5489 | ChrV_A_nidulans_FGSC_A4:2633531-2634870 | WT_5hasex | WT_veg | OK     | 85,2489  | 251,257  | 1,55941       | -3,14127      | 0,00168216 | 0,0120851  | yes |
| AN5490 | ChrV_A_nidulans_FGSC_A4:2630376-2632390 | WT_5hasex | WT_veg | OK     | 56,7563  | 74,3175  | 0,388921      | -0,754062     | 0,450812   | 0,712849   | no  |
| AN5491 | ChrV_A_nidulans_FGSC_A4:2623048-2629526 | WT_5hasex | WT_veg | OK     | 21,1123  | 37,2685  | 0,819871      | -1,64446      | 0,100081   | 0,289523   | no  |
| AN5492 | ChrV_A_nidulans_FGSC_A4:2620660-2622624 | WT_5hasex | WT_veg | OK     | 16,4584  | 16,1031  | -0,0314846    | 0,0593386     | 0,952682   | 0,982416   | no  |
| AN5495 | ChrV_A_nidulans_FGSC_A4:2612838-2614017 | WT_5hasex | WT_veg | OK     | 68,2087  | 100,733  | 0,562514      | -1,13876      | 0,254802   | 0,524065   | no  |
| AN5496 | ChrV_A_nidulans_FGSC_A4:2610565-2612643 | WT_5hasex | WT_veg | OK     | 14,2393  | 29,5526  | 1,05341       | -1,96462      | 0,0494587  | 0,176224   | no  |
| AN5497 | ChrV_A_nidulans_FGSC_A4:2608751-2609800 | WT_5hasex | WT_veg | OK     | 163,349  | 98,9882  | -0,722628     | 1,32254       | 0,185987   | 0,435048   | no  |
| AN5498 | ChrV_A_nidulans_FGSC_A4:2607036-2608114 | WT_5hasex | WT_veg | OK     | 45,7116  | 100,209  | 1,13238       | -2,28045      | 0,0225812  | 0,0975595  | no  |
| AN5500 | ChrV_A_nidulans_FGSC_A4:2598336-2599530 | WT_5hasex | WT_veg | NOTEST | 0,523242 | 2,90487  | 2,47293       | -2,28688      | 0,0222026  | 1          | no  |
| AN5501 | ChrV_A_nidulans_FGSC_A4:2596580-2597543 | WT_5hasex | WT_veg | NOTEST | 0,214327 | 0        | -1.79769e+308 | -1.79769e+308 | 0,23809    | 1          | no  |
| AN5502 | ChrV_A_nidulans_FGSC_A4:2593069-2594539 | WT_5hasex | WT_veg | OK     | 7,94553  | 0,731191 | -3,44182      | 2,3987        | 0,0164534  | 0,0768098  | no  |
| AN5503 | ChrV_A_nidulans_FGSC_A4:2590534-2592427 | WT_5hasex | WT_veg | OK     | 7,59786  | 17,5175  | 1,20513       | -1,96214      | 0,0497465  | 0,176925   | no  |
| AN5504 | ChrV_A_nidulans_FGSC_A4:2587785-2589636 | WT_5hasex | WT_veg | NOTEST | 1,53424  | 0,434862 | -1,8189       | 1,24173       | 0,214335   | 1          | no  |
| AN5505 | ChrV_A_nidulans_FGSC_A4:2583160-2585059 | WT_5hasex | WT_veg | OK     | 0,32594  | 6,49     | 4,31554       | -3,55565      | 0,00037704 | 0,00341533 | yes |
| AN5506 | ChrV_A_nidulans_FGSC_A4:2580848-2581900 | WT_5hasex | WT_veg | NOTEST | 0        | 0        | 0             | 0             | 1          | 1          | no  |
| AN5507 | ChrV_A_nidulans_FGSC_A4:2578287-2580194 | WT_5hasex | WT_veg | NOTEST | 0,676354 | 0        | -1.79769e+308 | -1.79769e+308 | 0,0444961  | 1          | no  |
| AN5509 | ChrV_A_nidulans_FGSC_A4:2568537-2570005 | WT_5hasex | WT_veg | OK     | 28,3107  | 125,044  | 2,14301       | -4,08534      | 4,4012E-05 | 0,00053622 | yes |
| AN5510 | ChrV_A_nidulans_FGSC_A4:2565335-2566565 | WT_5hasex | WT_veg | OK     | 10,5449  | 34,0798  | 1,69237       | -2,786        | 0,00533625 | 0,0313267  | yes |
| AN5511 | ChrV_A_nidulans_FGSC_A4:2563422-2564712 | WT_5hasex | WT_veg | NOTEST | 0,150987 | 0,479205 | 1,66622       | -0,691454     | 0,48928    | 1          | no  |
| AN5512 | ChrV_A_nidulans_FGSC_A4:2560766-2561470 | WT_5hasex | WT_veg | OK     | 42,6319  | 138,16   | 1,69634       | -3,1207       | 0,00180419 | 0,0128069  | yes |
| AN5513 | ChrV_A_nidulans_FGSC_A4:2557274-2560060 | WT_5hasex | WT_veg | OK     | 3,70284  | 17,7271  | 2,25925       | -3,39642      | 0,00068273 | 0,00567069 | yes |
| AN5514 | ChrV_A_nidulans_FGSC_A4:2551782-2556984 | WT_5hasex | WT_veg | NOTEST | 1,08494  | 0,520249 | -1,06033      | 1,14497       | 0,25222    | 1          | no  |
| AN5516 | ChrV_A_nidulans_FGSC_A4:2539924-2542671 | WT_5hasex | WT_veg | OK     | 19,662   | 42,5441  | 1,11355       | -2,23591      | 0,0253578  | 0,106594   | no  |
| AN5517 | ChrV_A_nidulans_FGSC_A4:2534628-2538234 | WT_5hasex | WT_veg | OK     | 44,8087  | 88,7602  | 0,986134      | -2,05451      | 0,0399268  | 0,15064    | no  |
| AN5518 | ChrV_A_nidulans_FGSC_A4:2532821-2533885 | WT_5hasex | WT_veg | OK     | 24,7251  | 40,5165  | 0,712533      | -1,30583      | 0,191609   | 0,442708   | no  |
| AN5519 | ChrV_A_nidulans_FGSC_A4:2531899-2532591 | WT_5hasex | WT_veg | OK     | 31,462   | 65,4928  | 1,05773       | -1,85559      | 0,0635122  | 0,210297   | no  |
| AN5520 | ChrV_A_nidulans_FGSC_A4:2530101-2531481 | WT_5hasex | WT_veg | OK     | 684,527  | 1426,52  | 1,05932       | -1,92287      | 0,0544966  | 0,188623   | no  |
| AN5522 | ChrV_A_nidulans_FGSC_A4:2524939-2525578 | WT_5hasex | WT_veg | OK     | 68,7997  | 201,744  | 1,55205       | -3,08237      | 0,0020536  | 0,0142857  | yes |
| AN5524 | ChrV_A_nidulans_FGSC_A4:2520024-2521271 | WT_5hasex | WT_veg | OK     | 62,4889  | 139,381  | 1,15736       | -2,35431      | 0,0185569  | 0,0840656  | no  |
| AN5526 | ChrV_A_nidulans_FGSC_A4:2514463-2515336 | WT_5hasex | WT_veg | OK     | 79,6927  | 301,252  | 1,91845       | -3,81863      | 0,00013419 | 0,00141851 | yes |
| AN5528 | ChrV_A_nidulans_FGSC_A4:2501540-2504386 | WT_5hasex | WT_veg | OK     | 33,4591  | 36,9548  | 0,143363      | -0,296205     | 0,767074   | 0,904288   | no  |
| AN5530 | ChrV_A_nidulans_FGSC_A4:2495544-2496348 | WT_5hasex | WT_veg | OK     | 49,9902  | 121,203  | 1,27771       | -2,46689      | 0,013629   | 0,0663938  | no  |
| AN5531 | ChrV_A_nidulans_FGSC_A4:2493356-2495358 | WT_5hasex | WT_veg | OK     | 22,0061  | 19,0076  | -0,21133      | 0,415361      | 0,677878   | 0,857236   | no  |
| AN5532 | ChrV_A_nidulans_FGSC_A4:2492059-2492932 | WT_5hasex | WT_veg | OK     | 10,0676  | 31,1524  | 1,62963       | -2,52561      | 0,0115498  | 0,0583693  | no  |
| AN5533 | ChrV_A_nidulans_FGSC_A4:2488486-2490919 | WT_5hasex | WT_veg | OK     | 13,2242  | 40,53    | 1,61581       | -2,98907      | 0,0027983  | 0,0184402  | yes |
| AN5534 | ChrV_A_nidulans_FGSC_A4:2486813-2488015 | WT_5hasex | WT_veg | OK     | 28,7622  | 78,1819  | 1,44266       | -2,47816      | 0,013206   | 0,0648569  | no  |
| AN5535 | ChrV_A_nidulans_FGSC_A4:2483443-2485723 | WT_5hasex | WT_veg | OK     | 32,2314  | 72,0515  | 1,16056       | -2,35744      | 0,0184012  | 0,0835655  | no  |

## Supplementary table 1

|        |                                         |           |        |        |          |          |               |               |            |            |     |
|--------|-----------------------------------------|-----------|--------|--------|----------|----------|---------------|---------------|------------|------------|-----|
| AN5536 | ChrV_A_nidulans_FGSC_A4:2481958-2483291 | WT_5hasex | WT_veg | OK     | 54,2503  | 168,799  | 1,6376        | -3,33117      | 0,00086482 | 0,00695067 | yes |
| AN5538 | ChrV_A_nidulans_FGSC_A4:2474863-2475535 | WT_5hasex | WT_veg | NOTEST | 0        | 0        | 0             | 0             | 1          | 1          | no  |
| AN5539 | ChrV_A_nidulans_FGSC_A4:2470097-2471315 | WT_5hasex | WT_veg | NOTEST | 0,364705 | 0        | -1.79769e+308 | -1.79769e+308 | 0,114919   | 1          | no  |
| AN5540 | ChrV_A_nidulans_FGSC_A4:2467351-2469028 | WT_5hasex | WT_veg | OK     | 162,233  | 96,0306  | -0,756499     | 1,28997       | 0,197062   | 0,450464   | no  |
| AN5542 | ChrV_A_nidulans_FGSC_A4:2462746-2464102 | WT_5hasex | WT_veg | OK     | 18,3763  | 3,18353  | -2,52915      | 3,48321       | 0,00049544 | 0,00431837 | yes |
| AN5543 | ChrV_A_nidulans_FGSC_A4:2461756-2462220 | WT_5hasex | WT_veg | OK     | 2,93023  | 2,73167  | -0,101232     | 0,0667204     | 0,946804   | 0,980192   | no  |
| AN5544 | ChrV_A_nidulans_FGSC_A4:2460483-2461284 | WT_5hasex | WT_veg | NOTEST | 0,226696 | 1,05694  | 2,22106       | -1,14626      | 0,251686   | 1          | no  |
| AN5545 | ChrV_A_nidulans_FGSC_A4:2458543-2460055 | WT_5hasex | WT_veg | NOTEST | 0        | 1,61064  | 1.79769e+308  | 1.79769e+308  | 0,0114433  | 1          | no  |
| AN5547 | ChrV_A_nidulans_FGSC_A4:2452441-2453638 | WT_5hasex | WT_veg | OK     | 34,1847  | 110,245  | 1,68929       | -3,11028      | 0,00186908 | 0,013184   | yes |
| AN5549 | ChrV_A_nidulans_FGSC_A4:2444817-2446788 | WT_5hasex | WT_veg | OK     | 40,1529  | 140,698  | 1,80903       | -3,58795      | 0,00033329 | 0,00307753 | yes |
| AN5550 | ChrV_A_nidulans_FGSC_A4:2441648-2443179 | WT_5hasex | WT_veg | OK     | 6,24402  | 24,9494  | 1,99846       | -2,69884      | 0,00695821 | 0,0389347  | yes |
| AN5551 | ChrV_A_nidulans_FGSC_A4:2439313-2441271 | WT_5hasex | WT_veg | NOTEST | 0,132242 | 1,0228   | 2,95127       | -1,35463      | 0,175535   | 1          | no  |
| AN5555 | ChrV_A_nidulans_FGSC_A4:2420461-2422176 | WT_5hasex | WT_veg | NOTEST | 0,305684 | 0,888609 | 1,53951       | -0,965261     | 0,334414   | 1          | no  |
| AN5556 | ChrV_A_nidulans_FGSC_A4:2419144-2419945 | WT_5hasex | WT_veg | OK     | 36,2735  | 61,2979  | 0,75692       | -1,40969      | 0,158632   | 0,393479   | no  |
| AN5557 | ChrV_A_nidulans_FGSC_A4:2417538-2418688 | WT_5hasex | WT_veg | OK     | 75,1928  | 95,1398  | 0,339454      | -0,68839      | 0,491207   | 0,743508   | no  |
| AN5559 | ChrV_A_nidulans_FGSC_A4:2411213-2412993 | WT_5hasex | WT_veg | OK     | 6,80599  | 5,32087  | -0,355142     | 0,511844      | 0,60876    | 0,818483   | no  |
| AN5561 | ChrV_A_nidulans_FGSC_A4:2406895-2407975 | WT_5hasex | WT_veg | OK     | 18,3433  | 43,0575  | 1,23101       | -2,16188      | 0,0306273  | 0,12325    | no  |
| AN5564 | ChrV_A_nidulans_FGSC_A4:2396164-2398077 | WT_5hasex | WT_veg | OK     | 692,68   | 3348,53  | 2,27326       | -3,5081       | 0,00045132 | 0,00399022 | yes |
| AN5565 | ChrV_A_nidulans_FGSC_A4:2393894-2394953 | WT_5hasex | WT_veg | OK     | 10,2847  | 67,8838  | 2,72257       | -4,07417      | 4,6179E-05 | 0,00055848 | yes |
| AN5566 | ChrV_A_nidulans_FGSC_A4:2389713-2391539 | WT_5hasex | WT_veg | OK     | 27,0588  | 73,4541  | 1,44074       | -2,85199      | 0,00434459 | 0,0265684  | yes |
| AN5567 | ChrV_A_nidulans_FGSC_A4:2386465-2387222 | WT_5hasex | WT_veg | OK     | 33,0069  | 15,4761  | -1,09273      | 1,91713       | 0,0552208  | 0,190349   | no  |
| AN5568 | ChrV_A_nidulans_FGSC_A4:2381324-2384280 | WT_5hasex | WT_veg | OK     | 194,004  | 289,918  | 0,579559      | -0,96804      | 0,333024   | 0,609426   | no  |
| AN5569 | ChrV_A_nidulans_FGSC_A4:2379045-2381037 | WT_5hasex | WT_veg | OK     | 38,4635  | 53,8309  | 0,484944      | -0,998046     | 0,318257   | 0,594322   | no  |
| AN5570 | ChrV_A_nidulans_FGSC_A4:2375527-2377619 | WT_5hasex | WT_veg | OK     | 43,4715  | 140,501  | 1,69244       | -3,31708      | 0,00090963 | 0,00725073 | yes |
| AN5572 | ChrV_A_nidulans_FGSC_A4:2367623-2371002 | WT_5hasex | WT_veg | OK     | 15,2795  | 24,1697  | 0,661602      | -1,33619      | 0,181486   | 0,42833    | no  |
| AN5573 | ChrV_A_nidulans_FGSC_A4:2364111-2366805 | WT_5hasex | WT_veg | OK     | 49,7447  | 96,4803  | 0,955691      | -1,98183      | 0,0474982  | 0,171408   | no  |
| AN5574 | ChrV_A_nidulans_FGSC_A4:2361186-2362017 | WT_5hasex | WT_veg | OK     | 10,2158  | 12,0107  | 0,23351       | -0,316835     | 0,751369   | 0,896329   | no  |
| AN5575 | ChrV_A_nidulans_FGSC_A4:2355773-2359002 | WT_5hasex | WT_veg | OK     | 9,22644  | 15,8595  | 0,781503      | -1,45105      | 0,146766   | 0,373923   | no  |
| AN5576 | ChrV_A_nidulans_FGSC_A4:2353321-2354861 | WT_5hasex | WT_veg | OK     | 15,7349  | 56,8454  | 1,85307       | -3,34618      | 0,00081933 | 0,00662773 | yes |
| AN5578 | ChrV_A_nidulans_FGSC_A4:2349375-2351712 | WT_5hasex | WT_veg | OK     | 13,0159  | 36,831   | 1,50064       | -2,87749      | 0,00400848 | 0,0248328  | yes |
| AN5579 | ChrV_A_nidulans_FGSC_A4:2338964-2348646 | WT_5hasex | WT_veg | OK     | 17,803   | 101,761  | 2,51498       | -5,08953      | 3,5896E-07 | 7,3637E-06 | yes |
| AN5580 | ChrV_A_nidulans_FGSC_A4:2336650-2338180 | WT_5hasex | WT_veg | OK     | 259,152  | 494,827  | 0,933125      | -1,85423      | 0,0637063  | 0,210754   | no  |
| AN5581 | ChrV_A_nidulans_FGSC_A4:2334905-2336273 | WT_5hasex | WT_veg | OK     | 23,4996  | 36,1273  | 0,620451      | -1,16595      | 0,243637   | 0,510897   | no  |
| AN5582 | ChrV_A_nidulans_FGSC_A4:2331349-2332959 | WT_5hasex | WT_veg | NOTEST | 0,54048  | 3,29191  | 2,60661       | -1,87159      | 0,0612635  | 1          | no  |
| AN5583 | ChrV_A_nidulans_FGSC_A4:2327377-2328452 | WT_5hasex | WT_veg | OK     | 72,6549  | 170,798  | 1,23316       | -2,52489      | 0,0115736  | 0,0584615  | no  |
| AN5584 | ChrV_A_nidulans_FGSC_A4:2320226-2321638 | WT_5hasex | WT_veg | OK     | 21,2159  | 8,19995  | -1,37146      | 1,9905        | 0,0465361  | 0,16882    | no  |
| AN5585 | ChrV_A_nidulans_FGSC_A4:2317949-2319388 | WT_5hasex | WT_veg | OK     | 58,0724  | 42,8693  | -0,437906     | 0,881102      | 0,378262   | 0,652764   | no  |
| AN5586 | ChrV_A_nidulans_FGSC_A4:2315793-2317149 | WT_5hasex | WT_veg | OK     | 142,297  | 121,27   | -0,230684     | 0,462334      | 0,643842   | 0,838084   | no  |
| AN5587 | ChrV_A_nidulans_FGSC_A4:2313884-2314970 | WT_5hasex | WT_veg | OK     | 9,49744  | 12,3098  | 0,374199      | -0,579159     | 0,562482   | 0,790432   | no  |
| AN5588 | ChrV_A_nidulans_FGSC_A4:2310399-2313331 | WT_5hasex | WT_veg | OK     | 169,478  | 194,71   | 0,200229      | -0,381084     | 0,703141   | 0,871189   | no  |
| AN5589 | ChrV_A_nidulans_FGSC_A4:2306394-2309144 | WT_5hasex | WT_veg | OK     | 140,453  | 199,729  | 0,507951      | -0,985881     | 0,324192   | 0,600662   | no  |
| AN5590 | ChrV_A_nidulans_FGSC_A4:2304558-2306220 | WT_5hasex | WT_veg | OK     | 10,0878  | 8,39411  | -0,265156     | 0,447711      | 0,654362   | 0,844089   | no  |
| AN5591 | ChrV_A_nidulans_FGSC_A4:2302670-2304373 | WT_5hasex | WT_veg | OK     | 118,039  | 667,652  | 2,49983       | -5,03536      | 4,7695E-07 | 9,4671E-06 | yes |
| AN5592 | ChrV_A_nidulans_FGSC_A4:2298512-2301434 | WT_5hasex | WT_veg | OK     | 16,2531  | 25,2715  | 0,636793      | -1,23809      | 0,215681   | 0,475578   | no  |
| AN5593 | ChrV_A_nidulans_FGSC_A4:2294012-2296678 | WT_5hasex | WT_veg | OK     | 21,5139  | 33,9049  | 0,656223      | -1,32286      | 0,185881   | 0,434884   | no  |
| AN5594 | ChrV_A_nidulans_FGSC_A4:2291901-2293386 | WT_5hasex | WT_veg | OK     | 3,21643  | 5,47104  | 0,766356      | -1,03055      | 0,302751   | 0,578555   | no  |
| AN5595 | ChrV_A_nidulans_FGSC_A4:2288171-2291722 | WT_5hasex | WT_veg | OK     | 26,5448  | 58,223   | 1,13316       | -2,33646      | 0,0194675  | 0,0872659  | no  |
| AN5596 | ChrV_A_nidulans_FGSC_A4:2284350-2287469 | WT_5hasex | WT_veg | OK     | 11,8052  | 22,7149  | 0,944215      | -1,60974      | 0,107454   | 0,304581   | no  |
| AN5597 | ChrV_A_nidulans_FGSC_A4:2284350-2287469 | WT_5hasex | WT_veg | OK     | 280,749  | 557,894  | 0,99071       | -1,90209      | 0,0571595  | 0,195158   | no  |
| AN5598 | ChrV_A_nidulans_FGSC_A4:2282780-2284166 | WT_5hasex | WT_veg | OK     | 33,7468  | 95,2404  | 1,49682       | -2,90788      | 0,00363892 | 0,022966   | yes |
| AN5599 | ChrV_A_nidulans_FGSC_A4:2279082-2281960 | WT_5hasex | WT_veg | OK     | 89,789   | 324,766  | 1,85479       | -3,58446      | 0,00033778 | 0,00311461 | yes |
| AN5600 | ChrV_A_nidulans_FGSC_A4:2276891-2278849 | WT_5hasex | WT_veg | OK     | 62,9867  | 105,153  | 0,739377      | -1,52769      | 0,12659    | 0,339306   | no  |
| AN5601 | ChrV_A_nidulans_FGSC_A4:2274988-2276689 | WT_5hasex | WT_veg | OK     | 111,176  | 129,73   | 0,222668      | -0,453578     | 0,650133   | 0,841622   | no  |



## Supplementary table 1

|        |                                         |           |        |        |          |          |              |              |            |            |     |
|--------|-----------------------------------------|-----------|--------|--------|----------|----------|--------------|--------------|------------|------------|-----|
| AN5602 | ChrV_A_nidulans_FGSC_A4:2272709-2274633 | WT_5hasex | WT_veg | OK     | 156,776  | 637,893  | 2,02461      | -3,91008     | 9,2266E-05 | 0,00102326 | yes |
| AN5603 | ChrV_A_nidulans_FGSC_A4:2257108-2260929 | WT_5hasex | WT_veg | OK     | 24,35    | 72,083   | 1,56574      | -2,97828     | 0,00289869 | 0,0189871  | yes |
| AN5605 | ChrV_A_nidulans_FGSC_A4:2251416-2252275 | WT_5hasex | WT_veg | OK     | 12,2109  | 57,1723  | 2,22714      | -3,57427     | 0,00035121 | 0,00321692 | yes |
| AN5606 | ChrV_A_nidulans_FGSC_A4:2247988-2250923 | WT_5hasex | WT_veg | OK     | 75,572   | 114,564  | 0,600235     | -1,23921     | 0,215269   | 0,47503    | no  |
| AN5607 | ChrV_A_nidulans_FGSC_A4:2240769-2246790 | WT_5hasex | WT_veg | OK     | 24,1443  | 67,3647  | 1,48031      | -3,11071     | 0,0018664  | 0,0131739  | yes |
| AN5608 | ChrV_A_nidulans_FGSC_A4:2230459-2232150 | WT_5hasex | WT_veg | OK     | 2,19988  | 3,84192  | 0,804405     | -0,983738    | 0,325244   | 0,601923   | no  |
| AN5609 | ChrV_A_nidulans_FGSC_A4:2228077-2230098 | WT_5hasex | WT_veg | OK     | 4,38592  | 8,50276  | 0,955052     | -1,34179     | 0,179663   | 0,425695   | no  |
| AN5610 | ChrV_A_nidulans_FGSC_A4:2220928-2225366 | WT_5hasex | WT_veg | OK     | 17,7873  | 19,3365  | 0,12048      | -0,245084    | 0,806391   | 0,922289   | no  |
| AN5612 | ChrV_A_nidulans_FGSC_A4:2216193-2217969 | WT_5hasex | WT_veg | OK     | 17,3006  | 39,2735  | 1,18273      | -2,24538     | 0,0247439  | 0,104558   | no  |
| AN5614 | ChrV_A_nidulans_FGSC_A4:2208507-2210727 | WT_5hasex | WT_veg | OK     | 7,89316  | 12,7056  | 0,686786     | -1,12037     | 0,262558   | 0,533283   | no  |
| AN5615 | ChrV_A_nidulans_FGSC_A4:2203057-2206157 | WT_5hasex | WT_veg | NOTEST | 0        | 0,345304 | 1.79769e+308 | 1.79769e+308 | 0,0716995  | 1          | no  |
| AN5616 | ChrV_A_nidulans_FGSC_A4:2200964-2202660 | WT_5hasex | WT_veg | OK     | 35,1809  | 54,7814  | 0,638892     | -1,27329     | 0,202915   | 0,458728   | no  |
| AN5617 | ChrV_A_nidulans_FGSC_A4:2198640-2200227 | WT_5hasex | WT_veg | OK     | 26,5055  | 26,0959  | -0,0224693   | 0,0444079    | 0,964579   | 0,987164   | no  |
| AN5619 | ChrV_A_nidulans_FGSC_A4:2194074-2196833 | WT_5hasex | WT_veg | OK     | 17,4058  | 50,3209  | 1,53159      | -3,0831      | 0,00204854 | 0,0142673  | yes |
| AN5620 | ChrV_A_nidulans_FGSC_A4:2191540-2193320 | WT_5hasex | WT_veg | OK     | 13,9259  | 16,9159  | 0,280612     | -0,511556    | 0,608962   | 0,818582   | no  |
| AN5621 | ChrV_A_nidulans_FGSC_A4:2187435-2189000 | WT_5hasex | WT_veg | OK     | 25,8457  | 123,78   | 2,25978      | -4,54502     | 5,493E-06  | 8,419E-05  | yes |
| AN5622 | ChrV_A_nidulans_FGSC_A4:2184797-2186518 | WT_5hasex | WT_veg | OK     | 9,99771  | 25,0487  | 1,32507      | -2,2902      | 0,0220099  | 0,0958259  | no  |
| AN5623 | ChrV_A_nidulans_FGSC_A4:2182361-2184169 | WT_5hasex | WT_veg | OK     | 21,2123  | 13,2397  | -0,680032    | 1,31416      | 0,188791   | 0,438888   | no  |
| AN5624 | ChrV_A_nidulans_FGSC_A4:2178020-2182109 | WT_5hasex | WT_veg | OK     | 30,1927  | 266,684  | 3,14286      | -6,38855     | 1,6747E-10 | 6,6939E-09 | yes |
| AN5625 | ChrV_A_nidulans_FGSC_A4:2175416-2176392 | WT_5hasex | WT_veg | OK     | 22,9141  | 61,1443  | 1,41598      | -2,50607     | 0,0122082  | 0,0609805  | no  |
| AN5628 | ChrV_A_nidulans_FGSC_A4:2159839-2161670 | WT_5hasex | WT_veg | NOTEST | 0,377819 | 0,45315  | 0,262295     | -0,159115    | 0,873578   | 1          | no  |
| AN5629 | ChrV_A_nidulans_FGSC_A4:2157708-2159563 | WT_5hasex | WT_veg | OK     | 94,9295  | 167,435  | 0,81867      | -1,69706     | 0,0896845  | 0,268567   | no  |
| AN5630 | ChrV_A_nidulans_FGSC_A4:2155234-2157506 | WT_5hasex | WT_veg | OK     | 12,7122  | 24,9748  | 0,974253     | -1,82166     | 0,0685073  | 0,222121   | no  |
| AN5631 | ChrV_A_nidulans_FGSC_A4:2151106-2154944 | WT_5hasex | WT_veg | OK     | 40,4486  | 48,9069  | 0,273948     | -0,567221    | 0,570564   | 0,795409   | no  |
| AN5632 | ChrV_A_nidulans_FGSC_A4:2149092-2149845 | WT_5hasex | WT_veg | OK     | 55,9916  | 92,5785  | 0,725465     | -1,33948     | 0,180413   | 0,426895   | no  |
| AN5633 | ChrV_A_nidulans_FGSC_A4:2144134-2146660 | WT_5hasex | WT_veg | OK     | 10,1365  | 21,4193  | 1,07935      | -1,96327     | 0,0496153  | 0,176662   | no  |
| AN5637 | ChrV_A_nidulans_FGSC_A4:2131743-2132722 | WT_5hasex | WT_veg | OK     | 34,5793  | 59,0016  | 0,770846     | -1,39695     | 0,16243    | 0,398779   | no  |
| AN5638 | ChrV_A_nidulans_FGSC_A4:2130127-2131150 | WT_5hasex | WT_veg | OK     | 21,4044  | 48,8434  | 1,19026      | -2,16776     | 0,0301773  | 0,121858   | no  |
| AN5639 | ChrV_A_nidulans_FGSC_A4:2128164-2129835 | WT_5hasex | WT_veg | OK     | 18,7039  | 53,3029  | 1,51088      | -2,75553     | 0,0058597  | 0,0338321  | yes |
| AN5640 | ChrV_A_nidulans_FGSC_A4:2123585-2127012 | WT_5hasex | WT_veg | OK     | 25,8406  | 40,5408  | 0,649737     | -1,33912     | 0,180532   | 0,427014   | no  |
| AN5641 | ChrV_A_nidulans_FGSC_A4:2119727-2121754 | WT_5hasex | WT_veg | OK     | 25,9494  | 38,5053  | 0,569356     | -1,14325     | 0,252937   | 0,522011   | no  |
| AN5642 | ChrV_A_nidulans_FGSC_A4:2117844-2119046 | WT_5hasex | WT_veg | OK     | 40,5867  | 102,902  | 1,34219      | -2,71622     | 0,00660312 | 0,0373991  | yes |
| AN5643 | ChrV_A_nidulans_FGSC_A4:2113657-2117337 | WT_5hasex | WT_veg | OK     | 29,1611  | 66,4859  | 1,189        | -2,48402     | 0,0129907  | 0,0640402  | no  |
| AN5644 | ChrV_A_nidulans_FGSC_A4:2111055-2112763 | WT_5hasex | WT_veg | OK     | 28,7771  | 40,4577  | 0,491493     | -0,97599     | 0,32907    | 0,605601   | no  |
| AN5646 | ChrV_A_nidulans_FGSC_A4:2106701-2109184 | WT_5hasex | WT_veg | OK     | 90,9483  | 207,435  | 1,18954      | -2,4876      | 0,0128608  | 0,0635426  | no  |
| AN5647 | ChrV_A_nidulans_FGSC_A4:2105220-2106120 | WT_5hasex | WT_veg | OK     | 20,9539  | 34,7542  | 0,729967     | -1,23637     | 0,216319   | 0,476417   | no  |
| AN5648 | ChrV_A_nidulans_FGSC_A4:2101620-2104234 | WT_5hasex | WT_veg | OK     | 23,2815  | 37,4056  | 0,684067     | -1,38488     | 0,166088   | 0,404744   | no  |
| AN5649 | ChrV_A_nidulans_FGSC_A4:2094915-2100573 | WT_5hasex | WT_veg | OK     | 26,8509  | 20,2598  | -0,406352    | 0,750481     | 0,452965   | 0,714389   | no  |
| AN5650 | ChrV_A_nidulans_FGSC_A4:2089626-2091343 | WT_5hasex | WT_veg | OK     | 48,2389  | 24,1457  | -0,998432    | 2,00411      | 0,045058   | 0,164722   | no  |
| AN5651 | ChrV_A_nidulans_FGSC_A4:2086892-2089098 | WT_5hasex | WT_veg | OK     | 5,09325  | 11,5391  | 1,17987      | -1,86185     | 0,0626246  | 0,208319   | no  |
| AN5652 | ChrV_A_nidulans_FGSC_A4:2082150-2086417 | WT_5hasex | WT_veg | OK     | 12,6703  | 31,1344  | 1,29705      | -2,54562     | 0,0109083  | 0,0557731  | no  |
| AN5653 | ChrV_A_nidulans_FGSC_A4:2079840-2080863 | WT_5hasex | WT_veg | OK     | 4,83887  | 16,0781  | 1,73235      | -2,4785      | 0,0131937  | 0,0648021  | no  |
| AN5654 | ChrV_A_nidulans_FGSC_A4:2079309-2079783 | WT_5hasex | WT_veg | OK     | 0,422378 | 6,03972  | 3,83787      | -1,82057     | 0,068673   | 0,222484   | no  |
| AN5655 | ChrV_A_nidulans_FGSC_A4:2075275-2077220 | WT_5hasex | WT_veg | OK     | 3,98287  | 15,1086  | 1,92349      | -2,84735     | 0,00440844 | 0,0268993  | yes |
| AN5656 | ChrV_A_nidulans_FGSC_A4:2072456-2074285 | WT_5hasex | WT_veg | OK     | 2,69749  | 10,459   | 1,95505      | -2,79702     | 0,00515761 | 0,0304907  | yes |
| AN5657 | ChrV_A_nidulans_FGSC_A4:2070883-2072248 | WT_5hasex | WT_veg | OK     | 68,9446  | 76,0015  | 0,14059      | -0,290141    | 0,771708   | 0,906319   | no  |
| AN5658 | ChrV_A_nidulans_FGSC_A4:2068173-2070135 | WT_5hasex | WT_veg | OK     | 16,9935  | 25,3598  | 0,577561     | -1,05502     | 0,291418   | 0,566133   | no  |
| AN5659 | ChrV_A_nidulans_FGSC_A4:2065918-2067014 | WT_5hasex | WT_veg | OK     | 4,86729  | 6,50718  | 0,418912     | -0,560556    | 0,575101   | 0,798292   | no  |
| AN5662 | ChrV_A_nidulans_FGSC_A4:2046946-2049507 | WT_5hasex | WT_veg | OK     | 88,3513  | 161,342  | 0,8688       | -1,7609      | 0,078256   | 0,243993   | no  |
| AN5663 | ChrV_A_nidulans_FGSC_A4:2045062-2046643 | WT_5hasex | WT_veg | OK     | 44,2926  | 79,4331  | 0,842675     | -1,70634     | 0,0879441  | 0,264808   | no  |
| AN5664 | ChrV_A_nidulans_FGSC_A4:2042315-2043637 | WT_5hasex | WT_veg | OK     | 7,61971  | 35,9262  | 2,23723      | -2,83591     | 0,00456955 | 0,0276701  | yes |
| AN5667 | ChrV_A_nidulans_FGSC_A4:2034811-2037011 | WT_5hasex | WT_veg | OK     | 11,3011  | 45,6277  | 2,01345      | -3,67514     | 0,00023772 | 0,00231067 | yes |
| AN5668 | ChrV_A_nidulans_FGSC_A4:2032782-2034295 | WT_5hasex | WT_veg | OK     | 150,453  | 388,848  | 1,36989      | -2,58798     | 0,00965408 | 0,050645   | no  |

## Supplementary table 1

|        |                                         |           |        |        |          |          |           |           |            |            |     |
|--------|-----------------------------------------|-----------|--------|--------|----------|----------|-----------|-----------|------------|------------|-----|
| AN5669 | ChrV_A_nidulans_FGSC_A4:2029904-2031833 | WT_5hasex | WT_veg | OK     | 19,6861  | 39,975   | 1,02192   | -1,95505  | 0,0505774  | 0,178981   | no  |
| AN5670 | ChrV_A_nidulans_FGSC_A4:2023307-2024206 | WT_5hasex | WT_veg | OK     | 382,338  | 689,122  | 0,849909  | -1,68838  | 0,0913389  | 0,271581   | no  |
| AN5671 | ChrV_A_nidulans_FGSC_A4:2017738-2020919 | WT_5hasex | WT_veg | OK     | 108,328  | 173,421  | 0,678874  | -1,23975  | 0,215067   | 0,4748     | no  |
| AN5672 | ChrV_A_nidulans_FGSC_A4:2015732-2017248 | WT_5hasex | WT_veg | OK     | 4,71969  | 6,72997  | 0,511907  | -0,725223 | 0,468315   | 0,726742   | no  |
| AN5673 | ChrV_A_nidulans_FGSC_A4:2012190-2014990 | WT_5hasex | WT_veg | OK     | 4,25078  | 5,5845   | 0,3937    | -0,626356 | 0,531082   | 0,770288   | no  |
| AN5674 | ChrV_A_nidulans_FGSC_A4:2007300-2009513 | WT_5hasex | WT_veg | OK     | 22,3075  | 29,4249  | 0,399508  | -0,755548 | 0,449921   | 0,712137   | no  |
| AN5675 | ChrV_A_nidulans_FGSC_A4:2004579-2006595 | WT_5hasex | WT_veg | OK     | 74,8565  | 98,8528  | 0,401155  | -0,811553 | 0,417048   | 0,686008   | no  |
| AN5676 | ChrV_A_nidulans_FGSC_A4:2002227-2004252 | WT_5hasex | WT_veg | OK     | 11,8358  | 16,4573  | 0,475567  | -0,862614 | 0,38835    | 0,661809   | no  |
| AN5677 | ChrV_A_nidulans_FGSC_A4:1998842-2001751 | WT_5hasex | WT_veg | OK     | 26,6657  | 55,1469  | 1,04829   | -2,16998  | 0,0300087  | 0,12142    | no  |
| AN5678 | ChrV_A_nidulans_FGSC_A4:1995775-1997948 | WT_5hasex | WT_veg | OK     | 47,8168  | 37,2551  | -0,360077 | 0,698658  | 0,484765   | 0,738952   | no  |
| AN5679 | ChrV_A_nidulans_FGSC_A4:1994597-1995449 | WT_5hasex | WT_veg | OK     | 143,228  | 271,823  | 0,924356  | -1,89339  | 0,0583058  | 0,198001   | no  |
| AN5680 | ChrV_A_nidulans_FGSC_A4:1992817-1993848 | WT_5hasex | WT_veg | OK     | 2,33946  | 0,956926 | -1,28969  | 1,05266   | 0,292499   | 0,567275   | no  |
| AN5681 | ChrV_A_nidulans_FGSC_A4:1991260-1992434 | WT_5hasex | WT_veg | OK     | 7,91803  | 6,03902  | -0,390826 | 0,574819  | 0,565414   | 0,792278   | no  |
| AN5682 | ChrV_A_nidulans_FGSC_A4:1988888-1990928 | WT_5hasex | WT_veg | OK     | 47,5028  | 82,0641  | 0,788739  | -1,61393  | 0,106542   | 0,302864   | no  |
| AN5683 | ChrV_A_nidulans_FGSC_A4:1987543-1988512 | WT_5hasex | WT_veg | OK     | 34,9051  | 40,0056  | 0,196765  | -0,376168 | 0,706792   | 0,873275   | no  |
| AN5684 | ChrV_A_nidulans_FGSC_A4:1985718-1986940 | WT_5hasex | WT_veg | OK     | 112,147  | 85,5012  | -0,391367 | 0,803271  | 0,421818   | 0,689928   | no  |
| AN5685 | ChrV_A_nidulans_FGSC_A4:1984795-1985522 | WT_5hasex | WT_veg | OK     | 9,87515  | 40,939   | 2,0516    | -3,10309  | 0,0019151  | 0,0134578  | yes |
| AN5687 | ChrV_A_nidulans_FGSC_A4:1981723-1983409 | WT_5hasex | WT_veg | OK     | 44,176   | 84,7322  | 0,939647  | -1,86053  | 0,0628109  | 0,208687   | no  |
| AN5688 | ChrV_A_nidulans_FGSC_A4:1979583-1981379 | WT_5hasex | WT_veg | OK     | 97,478   | 55,813   | -0,804474 | 1,65273   | 0,0983858  | 0,286073   | no  |
| AN5689 | ChrV_A_nidulans_FGSC_A4:1975995-1977815 | WT_5hasex | WT_veg | NOTEST | 1,32998  | 1,81769  | 0,4507    | -0,467733 | 0,639975   | 1          | no  |
| AN5690 | ChrV_A_nidulans_FGSC_A4:1971273-1973536 | WT_5hasex | WT_veg | OK     | 6,32293  | 18,6387  | 1,55964   | -2,47252  | 0,0134163  | 0,0656191  | no  |
| AN5691 | ChrV_A_nidulans_FGSC_A4:1968520-1970429 | WT_5hasex | WT_veg | OK     | 1,36158  | 4,68757  | 1,78356   | -2,15582  | 0,0310979  | 0,124854   | no  |
| AN5692 | ChrV_A_nidulans_FGSC_A4:1966184-1968266 | WT_5hasex | WT_veg | OK     | 49,9828  | 88,0132  | 0,816289  | -1,70344  | 0,0884854  | 0,265964   | no  |
| AN5693 | ChrV_A_nidulans_FGSC_A4:1964703-1965743 | WT_5hasex | WT_veg | OK     | 83,867   | 242,38   | 1,53109   | -2,99293  | 0,0027631  | 0,0182496  | yes |
| AN5694 | ChrV_A_nidulans_FGSC_A4:1961833-1964039 | WT_5hasex | WT_veg | OK     | 7,31678  | 28,082   | 1,94036   | -3,30473  | 0,00095068 | 0,00753441 | yes |
| AN5695 | ChrV_A_nidulans_FGSC_A4:1960287-1961565 | WT_5hasex | WT_veg | OK     | 79,3027  | 83,851   | 0,0804584 | -0,165232 | 0,868761   | 0,949725   | no  |
| AN5696 | ChrV_A_nidulans_FGSC_A4:1959572-1960182 | WT_5hasex | WT_veg | OK     | 2626,83  | 2818,62  | 0,101664  | -0,176614 | 0,859812   | 0,945677   | no  |
| AN5698 | ChrV_A_nidulans_FGSC_A4:1951037-1952368 | WT_5hasex | WT_veg | OK     | 15,013   | 25,364   | 0,756574  | -1,33577  | 0,181624   | 0,428483   | no  |
| AN5699 | ChrV_A_nidulans_FGSC_A4:1949465-1950368 | WT_5hasex | WT_veg | OK     | 21,634   | 67,5727  | 1,64314   | -2,86768  | 0,00413495 | 0,0254857  | yes |
| AN5700 | ChrV_A_nidulans_FGSC_A4:1948051-1949131 | WT_5hasex | WT_veg | OK     | 4,98283  | 11,5114  | 1,20803   | -1,68562  | 0,0918693  | 0,272833   | no  |
| AN5702 | ChrV_A_nidulans_FGSC_A4:1941270-1943070 | WT_5hasex | WT_veg | OK     | 28,3693  | 187,617  | 2,72539   | -5,30511  | 1,126E-07  | 2,5903E-06 | yes |
| AN5703 | ChrV_A_nidulans_FGSC_A4:1938637-1940759 | WT_5hasex | WT_veg | OK     | 143,521  | 314,303  | 1,1309    | -2,34645  | 0,0189533  | 0,0854136  | no  |
| AN5704 | ChrV_A_nidulans_FGSC_A4:1938637-1940759 | WT_5hasex | WT_veg | OK     | 338,759  | 419,388  | 0,308026  | -0,620737 | 0,534773   | 0,772628   | no  |
| AN5705 | ChrV_A_nidulans_FGSC_A4:1936540-1937948 | WT_5hasex | WT_veg | OK     | 76,6716  | 124,949  | 0,704579  | -1,45588  | 0,145426   | 0,371636   | no  |
| AN5707 | ChrV_A_nidulans_FGSC_A4:1930715-1931762 | WT_5hasex | WT_veg | OK     | 8,20635  | 23,788   | 1,53542   | -2,3596   | 0,0182948  | 0,0831612  | no  |
| AN5708 | ChrV_A_nidulans_FGSC_A4:1928428-1930394 | WT_5hasex | WT_veg | OK     | 15,9929  | 29,6124  | 0,888772  | -1,61538  | 0,106229   | 0,30222    | no  |
| AN5709 | ChrV_A_nidulans_FGSC_A4:1924040-1925717 | WT_5hasex | WT_veg | OK     | 7,82122  | 2,09151  | -1,90285  | 2,55552   | 0,0106031  | 0,0545583  | no  |
| AN5710 | ChrV_A_nidulans_FGSC_A4:1919477-1921828 | WT_5hasex | WT_veg | OK     | 27,0677  | 41,6424  | 0,621483  | -1,25482  | 0,209543   | 0,467414   | no  |
| AN5711 | ChrV_A_nidulans_FGSC_A4:1917943-1919230 | WT_5hasex | WT_veg | OK     | 16,4805  | 53,8688  | 1,70869   | -3,02644  | 0,00247455 | 0,0166666  | yes |
| AN5714 | ChrV_A_nidulans_FGSC_A4:1908462-1911121 | WT_5hasex | WT_veg | OK     | 94,178   | 161,621  | 0,779151  | -1,5786   | 0,114428   | 0,317374   | no  |
| AN5715 | ChrV_A_nidulans_FGSC_A4:1907257-1908219 | WT_5hasex | WT_veg | OK     | 1543,09  | 2378,82  | 0,624422  | -1,113    | 0,265707   | 0,537071   | no  |
| AN5716 | ChrV_A_nidulans_FGSC_A4:1904108-1906724 | WT_5hasex | WT_veg | OK     | 133,847  | 201,171  | 0,587844  | -1,14177  | 0,253548   | 0,522882   | no  |
| AN5718 | ChrV_A_nidulans_FGSC_A4:1897748-1899481 | WT_5hasex | WT_veg | OK     | 65,6665  | 170,901  | 1,37993   | -2,83899  | 0,0045257  | 0,0274614  | yes |
| AN5719 | ChrV_A_nidulans_FGSC_A4:1896220-1897366 | WT_5hasex | WT_veg | OK     | 1498,1   | 1978,17  | 0,401033  | -0,664733 | 0,506221   | 0,753918   | no  |
| AN5721 | ChrV_A_nidulans_FGSC_A4:1892129-1894422 | WT_5hasex | WT_veg | OK     | 31,1991  | 96,6511  | 1,63128   | -3,35601  | 0,00079076 | 0,0064264  | yes |
| AN5722 | ChrV_A_nidulans_FGSC_A4:1889828-1891735 | WT_5hasex | WT_veg | OK     | 45,7577  | 70,84    | 0,63055   | -1,28865  | 0,197521   | 0,45114    | no  |
| AN5723 | ChrV_A_nidulans_FGSC_A4:1887881-1889181 | WT_5hasex | WT_veg | OK     | 18,6318  | 35,8147  | 0,942787  | -1,70157  | 0,0888355  | 0,266756   | no  |
| AN5724 | ChrV_A_nidulans_FGSC_A4:1886771-1887761 | WT_5hasex | WT_veg | OK     | 13,4101  | 20,3957  | 0,604946  | -0,999798 | 0,317408   | 0,593656   | no  |
| AN5725 | ChrV_A_nidulans_FGSC_A4:1884569-1886431 | WT_5hasex | WT_veg | OK     | 42,3035  | 43,5787  | 0,0428478 | -0,087487 | 0,930284   | 0,973566   | no  |
| AN5728 | ChrV_A_nidulans_FGSC_A4:1874467-1878679 | WT_5hasex | WT_veg | OK     | 55,6994  | 126,715  | 1,18586   | -2,298    | 0,0215621  | 0,094323   | no  |
| AN5729 | ChrV_A_nidulans_FGSC_A4:1864476-1865310 | WT_5hasex | WT_veg | NOTEST | 0,859719 | 1,26476  | 0,556926  | -0,302171 | 0,762522   | 1          | no  |
| AN5730 | ChrV_A_nidulans_FGSC_A4:1860296-1863388 | WT_5hasex | WT_veg | OK     | 9,0345   | 13,1005  | 0,536102  | -1,00184  | 0,316421   | 0,592416   | no  |
| AN5731 | ChrV_A_nidulans_FGSC_A4:1858402-1859873 | WT_5hasex | WT_veg | OK     | 67,5918  | 48,3379  | -0,483693 | 0,949258  | 0,34249    | 0,617913   | no  |

## Supplementary table 1

|        |                                         |           |        |        |          |         |            |             |            |            |      |
|--------|-----------------------------------------|-----------|--------|--------|----------|---------|------------|-------------|------------|------------|------|
| AN5732 | ChrV_A_nidulans_FGSC_A4:1856646-1858062 | WT_5hasex | WT_veg | OK     | 19,2568  | 30,1151 | 0,645118   | -1,18946    | 0,23426    | 0,499324   | no   |
| AN5733 | ChrV_A_nidulans_FGSC_A4:1853817-1855830 | WT_5hasex | WT_veg | NOTEST | 0,725796 | 1,8514  | 1,35098    | -1,44778    | 0,147678   |            | 1 no |
| AN5734 | ChrV_A_nidulans_FGSC_A4:1849616-1851483 | WT_5hasex | WT_veg | OK     | 3,39551  | 7,20284 | 1,08494    | -1,50667    | 0,131895   | 0,348647   | no   |
| AN5735 | ChrV_A_nidulans_FGSC_A4:1846210-1848932 | WT_5hasex | WT_veg | OK     | 13,9152  | 37,4761 | 1,4293     | -2,78526    | 0,00534851 | 0,031375   | yes  |
| AN5736 | ChrV_A_nidulans_FGSC_A4:1844871-1845857 | WT_5hasex | WT_veg | OK     | 26,1868  | 32,4627 | 0,309945   | -0,553258   | 0,580087   | 0,801082   | no   |
| AN5737 | ChrV_A_nidulans_FGSC_A4:1841641-1844467 | WT_5hasex | WT_veg | OK     | 96,1386  | 243,105 | 1,33839    | -2,69953    | 0,00694383 | 0,0388789  | yes  |
| AN5738 | ChrV_A_nidulans_FGSC_A4:1841641-1844467 | WT_5hasex | WT_veg | OK     | 50,7179  | 29,3259 | -0,790318  | 1,55001     | 0,121138   | 0,329778   | no   |
| AN5739 | ChrV_A_nidulans_FGSC_A4:1838513-1841457 | WT_5hasex | WT_veg | OK     | 24,2782  | 36,0223 | 0,569229   | -1,15469    | 0,248217   | 0,516382   | no   |
| AN5741 | ChrV_A_nidulans_FGSC_A4:1833653-1834821 | WT_5hasex | WT_veg | OK     | 64,1745  | 177,933 | 1,47126    | -3,0127     | 0,00258933 | 0,0173047  | yes  |
| AN5742 | ChrV_A_nidulans_FGSC_A4:1831634-1833304 | WT_5hasex | WT_veg | OK     | 6,63539  | 14,9458 | 1,17148    | -1,8062     | 0,0708871  | 0,227528   | no   |
| AN5743 | ChrV_A_nidulans_FGSC_A4:1827232-1830752 | WT_5hasex | WT_veg | OK     | 68,5617  | 224,657 | 1,71225    | -3,48907    | 0,0004847  | 0,00423675 | yes  |
| AN5744 | ChrV_A_nidulans_FGSC_A4:1824071-1826334 | WT_5hasex | WT_veg | OK     | 357,445  | 640,633 | 0,841776   | -1,56342    | 0,117953   | 0,323969   | no   |
| AN5745 | ChrV_A_nidulans_FGSC_A4:1822552-1823849 | WT_5hasex | WT_veg | OK     | 139,431  | 439,246 | 1,65548    | -3,40369    | 0,00066481 | 0,00554207 | yes  |
| AN5747 | ChrV_A_nidulans_FGSC_A4:1817998-1819453 | WT_5hasex | WT_veg | OK     | 320,091  | 452,073 | 0,49807    | -0,97235    | 0,330877   | 0,607221   | no   |
| AN5748 | ChrV_A_nidulans_FGSC_A4:1815192-1817780 | WT_5hasex | WT_veg | OK     | 20,4056  | 24,1486 | 0,242976   | -0,473274   | 0,636017   | 0,833631   | no   |
| AN5749 | ChrV_A_nidulans_FGSC_A4:1813478-1814956 | WT_5hasex | WT_veg | OK     | 55,6732  | 92,1532 | 0,72705    | -1,48531    | 0,137462   | 0,358265   | no   |
| AN5750 | ChrV_A_nidulans_FGSC_A4:1809772-1811362 | WT_5hasex | WT_veg | OK     | 38,828   | 262,158 | 2,75527    | -5,69713    | 1,2184E-08 | 3,4605E-07 | yes  |
| AN5751 | ChrV_A_nidulans_FGSC_A4:1805866-1808259 | WT_5hasex | WT_veg | OK     | 11,8618  | 23,3217 | 0,975351   | -1,66907    | 0,0951029  | 0,279459   | no   |
| AN5752 | ChrV_A_nidulans_FGSC_A4:1804772-1805638 | WT_5hasex | WT_veg | OK     | 54,9852  | 134,101 | 1,2862     | -2,50017    | 0,0124133  | 0,0617854  | no   |
| AN5753 | ChrV_A_nidulans_FGSC_A4:1802951-1803904 | WT_5hasex | WT_veg | OK     | 404,589  | 586,497 | 0,535665   | -1,06645    | 0,286222   | 0,560506   | no   |
| AN5754 | ChrV_A_nidulans_FGSC_A4:1800628-1802638 | WT_5hasex | WT_veg | OK     | 15,3967  | 37,6359 | 1,28949    | -2,33263    | 0,0196676  | 0,0879897  | no   |
| AN5756 | ChrV_A_nidulans_FGSC_A4:1795911-1796379 | WT_5hasex | WT_veg | OK     | 2,86682  | 3,77443 | 0,396809   | -0,347079   | 0,728532   | 0,885001   | no   |
| AN5757 | ChrV_A_nidulans_FGSC_A4:1789098-1790925 | WT_5hasex | WT_veg | OK     | 97,3323  | 197,447 | 1,02048    | -2,01885    | 0,0435032  | 0,160449   | no   |
| AN5758 | ChrV_A_nidulans_FGSC_A4:1785769-1787323 | WT_5hasex | WT_veg | OK     | 15,8564  | 33,5226 | 1,08007    | -1,95909    | 0,0501021  | 0,177798   | no   |
| AN5759 | ChrV_A_nidulans_FGSC_A4:1781923-1784803 | WT_5hasex | WT_veg | OK     | 12,9413  | 48,2861 | 1,89962    | -3,7385     | 0,00018513 | 0,00186448 | yes  |
| AN5760 | ChrV_A_nidulans_FGSC_A4:1778880-1780499 | WT_5hasex | WT_veg | OK     | 22,9179  | 30,4503 | 0,40998    | -0,791642   | 0,428569   | 0,695075   | no   |
| AN5761 | ChrV_A_nidulans_FGSC_A4:1777905-1778677 | WT_5hasex | WT_veg | OK     | 25,934   | 25,9937 | 0,00331361 | -0,00556507 | 0,99556    | 0,998362   | no   |
| AN5762 | ChrV_A_nidulans_FGSC_A4:1776878-1777627 | WT_5hasex | WT_veg | OK     | 4,17591  | 2,52323 | -0,726818  | 0,599367    | 0,548928   | 0,781464   | no   |
| AN5763 | ChrV_A_nidulans_FGSC_A4:1773190-1775245 | WT_5hasex | WT_veg | OK     | 5,63621  | 13,52   | 1,26229    | -1,72099    | 0,0852534  | 0,259238   | no   |
| AN5764 | ChrV_A_nidulans_FGSC_A4:1769851-1772542 | WT_5hasex | WT_veg | OK     | 59,695   | 291,848 | 2,28953    | -4,71859    | 2,3749E-06 | 3,9925E-05 | yes  |
| AN5765 | ChrV_A_nidulans_FGSC_A4:1768764-1769358 | WT_5hasex | WT_veg | OK     | 2,83074  | 21,6098 | 2,93244    | -3,01675    | 0,00255504 | 0,0171236  | yes  |
| AN5767 | ChrV_A_nidulans_FGSC_A4:1763099-1764024 | WT_5hasex | WT_veg | OK     | 20,8799  | 24,0384 | 0,203222   | -0,347694   | 0,72807    | 0,884794   | no   |
| AN5768 | ChrV_A_nidulans_FGSC_A4:1761458-1762904 | WT_5hasex | WT_veg | OK     | 112,255  | 466,739 | 2,05584    | -4,26968    | 1,9576E-05 | 0,00026155 | yes  |
| AN5770 | ChrV_A_nidulans_FGSC_A4:1756549-1757952 | WT_5hasex | WT_veg | OK     | 25,6951  | 50,1535 | 0,964855   | -1,8212     | 0,0685763  | 0,222276   | no   |
| AN5771 | ChrV_A_nidulans_FGSC_A4:1755337-1756186 | WT_5hasex | WT_veg | OK     | 145,475  | 366,782 | 1,33415    | -2,7705     | 0,00559704 | 0,0325776  | yes  |
| AN5774 | ChrV_A_nidulans_FGSC_A4:1737000-1742774 | WT_5hasex | WT_veg | OK     | 17,7196  | 26,3322 | 0,571483   | -1,19581    | 0,231772   | 0,496075   | no   |
| AN5775 | ChrV_A_nidulans_FGSC_A4:1732249-1734856 | WT_5hasex | WT_veg | OK     | 11,5489  | 37,7655 | 1,70931    | -3,12063    | 0,00180463 | 0,0128069  | yes  |
| AN5776 | ChrV_A_nidulans_FGSC_A4:1727558-1731516 | WT_5hasex | WT_veg | OK     | 24,8698  | 61,4299 | 1,30455    | -2,64659    | 0,00813078 | 0,0441832  | yes  |
| AN5777 | ChrV_A_nidulans_FGSC_A4:1726037-1727320 | WT_5hasex | WT_veg | OK     | 14,2611  | 22,6228 | 0,665689   | -1,15314    | 0,248853   | 0,516963   | no   |
| AN5778 | ChrV_A_nidulans_FGSC_A4:1724404-1725800 | WT_5hasex | WT_veg | OK     | 136,673  | 206,001 | 0,591925   | -1,21998    | 0,222472   | 0,484216   | no   |
| AN5779 | ChrV_A_nidulans_FGSC_A4:1723486-1724245 | WT_5hasex | WT_veg | OK     | 45,0926  | 52,866  | 0,229448   | -0,430583   | 0,666772   | 0,851057   | no   |
| AN5780 | ChrV_A_nidulans_FGSC_A4:1718300-1720795 | WT_5hasex | WT_veg | OK     | 11,4483  | 11,2917 | -0,0198693 | 0,0340123   | 0,972867   | 0,99033    | no   |
| AN5781 | ChrV_A_nidulans_FGSC_A4:1716870-1718129 | WT_5hasex | WT_veg | OK     | 1587,51  | 3018,66 | 0,927145   | -1,19995    | 0,230158   | 0,493868   | no   |
| AN5782 | ChrV_A_nidulans_FGSC_A4:1714275-1715399 | WT_5hasex | WT_veg | OK     | 118,536  | 494,223 | 2,05983    | -4,20364    | 2,6265E-05 | 0,00034017 | yes  |
| AN5784 | ChrV_A_nidulans_FGSC_A4:1710663-1711691 | WT_5hasex | WT_veg | OK     | 329,637  | 629,981 | 0,93443    | -1,84212    | 0,0654578  | 0,214879   | no   |
| AN5785 | ChrV_A_nidulans_FGSC_A4:1709606-1710522 | WT_5hasex | WT_veg | OK     | 75,5357  | 565,944 | 2,90543    | -5,93289    | 2,9764E-09 | 9,5337E-08 | yes  |
| AN5786 | ChrV_A_nidulans_FGSC_A4:1707035-1709299 | WT_5hasex | WT_veg | OK     | 44,7489  | 144,479 | 1,69094    | -3,50414    | 0,00045809 | 0,00404123 | yes  |
| AN5787 | ChrV_A_nidulans_FGSC_A4:1701990-1706350 | WT_5hasex | WT_veg | OK     | 12,755   | 30,3602 | 1,25112    | -2,49543    | 0,0125806  | 0,0624582  | no   |
| AN5788 | ChrV_A_nidulans_FGSC_A4:1700525-1701344 | WT_5hasex | WT_veg | OK     | 38,6639  | 173,069 | 2,16229    | -3,95592    | 7,624E-05  | 0,00086606 | yes  |
| AN5789 | ChrV_A_nidulans_FGSC_A4:1698844-1700214 | WT_5hasex | WT_veg | OK     | 28,6588  | 116,187 | 2,0194     | -3,95162    | 7,7625E-05 | 0,0008795  | yes  |
| AN5790 | ChrV_A_nidulans_FGSC_A4:1696879-1698808 | WT_5hasex | WT_veg | OK     | 432,672  | 740,052 | 0,774355   | -1,41705    | 0,156468   | 0,389606   | no   |
| AN5792 | ChrV_A_nidulans_FGSC_A4:1694113-1695149 | WT_5hasex | WT_veg | OK     | 87,0691  | 83,9534 | -0,0525733 | 0,100924    | 0,919611   | 0,969327   | no   |
| AN5793 | ChrV_A_nidulans_FGSC_A4:1691293-1693540 | WT_5hasex | WT_veg | OK     | 267,536  | 405,27  | 0,599149   | -1,1288     | 0,258983   | 0,529102   | no   |

## Supplementary table 1

|        |                                         |           |        |        |          |         |            |           |            |            |     |
|--------|-----------------------------------------|-----------|--------|--------|----------|---------|------------|-----------|------------|------------|-----|
| AN5795 | ChrV_A_nidulans_FGSC_A4:1680998-1684994 | WT_5hasex | WT_veg | OK     | 21,8177  | 52,5705 | 1,26875    | -2,63265  | 0,0084722  | 0,0456514  | yes |
| AN5796 | ChrV_A_nidulans_FGSC_A4:1678728-1679943 | WT_5hasex | WT_veg | OK     | 11,0595  | 25,7101 | 1,21704    | -2,02891  | 0,0424677  | 0,157572   | no  |
| AN5797 | ChrV_A_nidulans_FGSC_A4:1672553-1677001 | WT_5hasex | WT_veg | OK     | 26,2125  | 49,7887 | 0,925566   | -1,93298  | 0,0532385  | 0,185481   | no  |
| AN5799 | ChrI_A_nidulans_FGSC_A4:2204395-2207013 | WT_5hasex | WT_veg | OK     | 82,0008  | 211,924 | 1,36984    | -2,79236  | 0,00523247 | 0,0308553  | yes |
| AN5800 | ChrI_A_nidulans_FGSC_A4:2204395-2207013 | WT_5hasex | WT_veg | OK     | 717,407  | 1097,93 | 0,613925   | -1,02781  | 0,30404    | 0,580076   | no  |
| AN5801 | ChrI_A_nidulans_FGSC_A4:2202083-2203428 | WT_5hasex | WT_veg | OK     | 76,2557  | 131,803 | 0,789462   | -1,62274  | 0,104644   | 0,298929   | no  |
| AN5804 | ChrI_A_nidulans_FGSC_A4:2192474-2195321 | WT_5hasex | WT_veg | OK     | 40,0061  | 71,3023 | 0,833727   | -1,67466  | 0,0940002  | 0,277169   | no  |
| AN5806 | ChrI_A_nidulans_FGSC_A4:2186266-2187260 | WT_5hasex | WT_veg | OK     | 98,1996  | 264,282 | 1,42829    | -2,8503   | 0,00436774 | 0,026682   | yes |
| AN5807 | ChrI_A_nidulans_FGSC_A4:2181303-2184812 | WT_5hasex | WT_veg | OK     | 21,2304  | 44,5235 | 1,06844    | -2,1642   | 0,030449   | 0,122714   | no  |
| AN5808 | ChrI_A_nidulans_FGSC_A4:2178376-2180822 | WT_5hasex | WT_veg | OK     | 8,90349  | 20,7529 | 1,22087    | -2,11094  | 0,0347775  | 0,136011   | no  |
| AN5809 | ChrI_A_nidulans_FGSC_A4:2177164-2178035 | WT_5hasex | WT_veg | OK     | 32,0493  | 45,6333 | 0,509797   | -0,93082  | 0,351947   | 0,627495   | no  |
| AN5811 | ChrI_A_nidulans_FGSC_A4:2171925-2172935 | WT_5hasex | WT_veg | OK     | 11,541   | 35,2166 | 1,60948    | -2,54649  | 0,0108812  | 0,0556672  | no  |
| AN5812 | ChrI_A_nidulans_FGSC_A4:2168300-2170929 | WT_5hasex | WT_veg | OK     | 70,0693  | 130,435 | 0,896475   | -1,85704  | 0,0633054  | 0,209865   | no  |
| AN5813 | ChrI_A_nidulans_FGSC_A4:2166822-2168004 | WT_5hasex | WT_veg | OK     | 33,41    | 77,1706 | 1,20777    | -2,34576  | 0,0189882  | 0,0855221  | no  |
| AN5814 | ChrI_A_nidulans_FGSC_A4:2165393-2166340 | WT_5hasex | WT_veg | OK     | 57,0244  | 38,5796 | -0,563741  | 1,10064   | 0,271054   | 0,54331    | no  |
| AN5815 | ChrI_A_nidulans_FGSC_A4:2163703-2165131 | WT_5hasex | WT_veg | OK     | 111,183  | 137,742 | 0,309031   | -0,635572 | 0,525056   | 0,766512   | no  |
| AN5816 | ChrI_A_nidulans_FGSC_A4:2162554-2163435 | WT_5hasex | WT_veg | OK     | 81,3015  | 75,7623 | -0,101802  | 0,201618  | 0,840216   | 0,936666   | no  |
| AN5817 | ChrI_A_nidulans_FGSC_A4:2160839-2162324 | WT_5hasex | WT_veg | OK     | 22,9172  | 46,6573 | 1,02567    | -1,92031  | 0,054819   | 0,1894     | no  |
| AN5818 | ChrI_A_nidulans_FGSC_A4:2159926-2160468 | WT_5hasex | WT_veg | OK     | 9,76443  | 29,4696 | 1,59362    | -2,16699  | 0,030236   | 0,122039   | no  |
| AN5819 | ChrI_A_nidulans_FGSC_A4:2158285-2159557 | WT_5hasex | WT_veg | OK     | 204,694  | 506,151 | 1,3061     | -2,617    | 0,00887055 | 0,0474079  | yes |
| AN5821 | ChrI_A_nidulans_FGSC_A4:2152438-2154224 | WT_5hasex | WT_veg | OK     | 10,6936  | 21,5283 | 1,00948    | -1,6036   | 0,108802   | 0,307241   | no  |
| AN5824 | ChrI_A_nidulans_FGSC_A4:2136040-2138535 | WT_5hasex | WT_veg | OK     | 36,6836  | 94,1095 | 1,35921    | -2,81818  | 0,00482965 | 0,028937   | yes |
| AN5826 | ChrI_A_nidulans_FGSC_A4:2128751-2130717 | WT_5hasex | WT_veg | OK     | 20,3493  | 25,0093 | 0,297481   | -0,571588 | 0,567601   | 0,793812   | no  |
| AN5827 | ChrI_A_nidulans_FGSC_A4:2125074-2128461 | WT_5hasex | WT_veg | OK     | 10,4888  | 13,8756 | 0,403699   | -0,794998 | 0,426615   | 0,693709   | no  |
| AN5828 | ChrI_A_nidulans_FGSC_A4:2124391-2124744 | WT_5hasex | WT_veg | OK     | 66,0489  | 170,791 | 1,37063    | -2,2921   | 0,0219     | 0,0954746  | no  |
| AN5829 | ChrI_A_nidulans_FGSC_A4:2120132-2124154 | WT_5hasex | WT_veg | OK     | 19,2485  | 15,5207 | -0,310552  | 0,641115  | 0,521448   | 0,764385   | no  |
| AN5830 | ChrI_A_nidulans_FGSC_A4:2116156-2117082 | WT_5hasex | WT_veg | OK     | 154,889  | 245,479 | 0,664366   | -1,37495  | 0,169145   | 0,409327   | no  |
| AN5831 | ChrI_A_nidulans_FGSC_A4:2114708-2115937 | WT_5hasex | WT_veg | OK     | 149,309  | 77,1359 | -0,952821  | 1,50602   | 0,132063   | 0,34895    | no  |
| AN5834 | ChrI_A_nidulans_FGSC_A4:2104556-2105604 | WT_5hasex | WT_veg | OK     | 2021,14  | 3491,34 | 0,788611   | -1,30004  | 0,193587   | 0,445434   | no  |
| AN5838 | ChrI_A_nidulans_FGSC_A4:2081753-2083880 | WT_5hasex | WT_veg | NOTEST | 1,57155  | 3,76235 | 1,25945    | -1,54516  | 0,122307   | 1          | no  |
| AN5839 | ChrI_A_nidulans_FGSC_A4:2076680-2081509 | WT_5hasex | WT_veg | OK     | 15,4398  | 37,7996 | 1,29172    | -2,67996  | 0,0073631  | 0,0407823  | yes |
| AN5841 | ChrI_A_nidulans_FGSC_A4:2063136-2064172 | WT_5hasex | WT_veg | OK     | 2,52551  | 1,47785 | -0,773071  | 0,628701  | 0,529545   | 0,76917    | no  |
| AN5844 | ChrI_A_nidulans_FGSC_A4:2056413-2057055 | WT_5hasex | WT_veg | OK     | 68,0506  | 7,42153 | -3,19682   | 4,52572   | 6,0192E-06 | 9,1399E-05 | yes |
| AN5845 | ChrI_A_nidulans_FGSC_A4:2055328-2055733 | WT_5hasex | WT_veg | OK     | 26,9078  | 12,3085 | -1,12837   | 1,39674   | 0,16249    | 0,398877   | no  |
| AN5846 | ChrI_A_nidulans_FGSC_A4:2052851-2054467 | WT_5hasex | WT_veg | OK     | 90,1125  | 33,0135 | -1,44867   | 2,71099   | 0,00670825 | 0,0378595  | yes |
| AN5847 | ChrI_A_nidulans_FGSC_A4:2050927-2052332 | WT_5hasex | WT_veg | OK     | 64,5133  | 98,4143 | 0,609272   | -1,25859  | 0,20818    | 0,465621   | no  |
| AN5848 | ChrI_A_nidulans_FGSC_A4:2048062-2049956 | WT_5hasex | WT_veg | OK     | 30,6816  | 40,3647 | 0,395719   | -0,797739 | 0,425022   | 0,692671   | no  |
| AN5849 | ChrI_A_nidulans_FGSC_A4:2034318-2037889 | WT_5hasex | WT_veg | OK     | 29,3027  | 62,191  | 1,08567    | -2,19191  | 0,0283862  | 0,116134   | no  |
| AN5850 | ChrI_A_nidulans_FGSC_A4:2032232-2033466 | WT_5hasex | WT_veg | OK     | 5,8996   | 10,8865 | 0,883851   | -1,27029  | 0,203983   | 0,46011    | no  |
| AN5852 | ChrI_A_nidulans_FGSC_A4:2012153-2013081 | WT_5hasex | WT_veg | OK     | 9,4473   | 10,3428 | 0,130651   | -0,186274 | 0,85223    | 0,942075   | no  |
| AN5853 | ChrI_A_nidulans_FGSC_A4:2010012-2011970 | WT_5hasex | WT_veg | OK     | 5,31575  | 11,9636 | 1,1703     | -1,77181  | 0,0764261  | 0,239991   | no  |
| AN5854 | ChrI_A_nidulans_FGSC_A4:2008556-2009715 | WT_5hasex | WT_veg | NOTEST | 0,584474 | 2,33908 | 2,00073    | -1,7799   | 0,0750926  | 1          | no  |
| AN5855 | ChrI_A_nidulans_FGSC_A4:2006437-2007366 | WT_5hasex | WT_veg | OK     | 24,9004  | 180,845 | 2,86051    | -5,19667  | 2,029E-07  | 4,4153E-06 | yes |
| AN5856 | ChrI_A_nidulans_FGSC_A4:2001382-2004247 | WT_5hasex | WT_veg | OK     | 68,5258  | 201,419 | 1,55548    | -3,05118  | 0,00227944 | 0,0155639  | yes |
| AN5857 | ChrI_A_nidulans_FGSC_A4:1997188-2000066 | WT_5hasex | WT_veg | OK     | 95,1483  | 152,645 | 0,681932   | -1,37174  | 0,170144   | 0,411155   | no  |
| AN5859 | ChrI_A_nidulans_FGSC_A4:1988349-1990538 | WT_5hasex | WT_veg | NOTEST | 1,73693  | 1,22794 | -0,500298  | 0,542324  | 0,587595   | 1          | no  |
| AN5861 | ChrI_A_nidulans_FGSC_A4:1981541-1982950 | WT_5hasex | WT_veg | OK     | 178,839  | 270,174 | 0,595225   | -1,20529  | 0,228091   | 0,491165   | no  |
| AN5862 | ChrI_A_nidulans_FGSC_A4:1980830-1981361 | WT_5hasex | WT_veg | OK     | 85,2498  | 84,8622 | -0,0065745 | 0,0127447 | 0,989832   | 0,996321   | no  |
| AN5863 | ChrI_A_nidulans_FGSC_A4:1979066-1979916 | WT_5hasex | WT_veg | OK     | 11,1774  | 25,5212 | 1,19111    | -1,73626  | 0,082518   | 0,253272   | no  |
| AN5864 | ChrI_A_nidulans_FGSC_A4:1975668-1977745 | WT_5hasex | WT_veg | OK     | 4,10277  | 2,23089 | -0,878976  | 1,04896   | 0,294195   | 0,568989   | no  |
| AN5865 | ChrI_A_nidulans_FGSC_A4:1972626-1975038 | WT_5hasex | WT_veg | OK     | 31,3598  | 286,751 | 3,19281    | -6,30605  | 2,8625E-10 | 1,1029E-08 | yes |
| AN5866 | ChrI_A_nidulans_FGSC_A4:1970860-1972429 | WT_5hasex | WT_veg | OK     | 85,2309  | 324,702 | 1,92967    | -4,00593  | 6,1774E-05 | 0,0072111  | yes |
| AN5867 | ChrI_A_nidulans_FGSC_A4:1966476-1968830 | WT_5hasex | WT_veg | OK     | 45,3151  | 164,59  | 1,86081    | -3,88056  | 0,00010422 | 0,00113678 | yes |

## Supplementary table 1

|        |                                         |           |        |        |          |         |               |               |            |            |     |
|--------|-----------------------------------------|-----------|--------|--------|----------|---------|---------------|---------------|------------|------------|-----|
| AN5868 | ChrI_A_nidulans_FGSC_A4:1964819-1966244 | WT_5hasex | WT_veg | OK     | 22,2656  | 29,2265 | 0,392456      | -0,724144     | 0,468977   | 0,727192   | no  |
| AN5870 | ChrI_A_nidulans_FGSC_A4:1956107-1959246 | WT_5hasex | WT_veg | OK     | 8,86221  | 5,95904 | -0,572587     | 1,04275       | 0,297063   | 0,572319   | no  |
| AN5871 | ChrI_A_nidulans_FGSC_A4:1953794-1955567 | WT_5hasex | WT_veg | OK     | 7,55648  | 45,8735 | 2,60188       | -4,1971       | 2,7036E-05 | 0,00034947 | yes |
| AN5872 | ChrI_A_nidulans_FGSC_A4:1952496-1953697 | WT_5hasex | WT_veg | OK     | 329,857  | 480,557 | 0,542866      | -1,09065      | 0,275426   | 0,548528   | no  |
| AN5874 | ChrI_A_nidulans_FGSC_A4:1945199-1946716 | WT_5hasex | WT_veg | OK     | 11,5255  | 12,1884 | 0,080671      | -0,122986     | 0,902118   | 0,962291   | no  |
| AN5875 | ChrI_A_nidulans_FGSC_A4:1941961-1943210 | WT_5hasex | WT_veg | OK     | 37,0395  | 169,385 | 2,19317       | -4,32593      | 1,5189E-05 | 0,0002094  | yes |
| AN5876 | ChrI_A_nidulans_FGSC_A4:1939676-1941484 | WT_5hasex | WT_veg | OK     | 10,8889  | 9,8826  | -0,139902     | 0,231253      | 0,817118   | 0,926799   | no  |
| AN5878 | ChrI_A_nidulans_FGSC_A4:1934673-1936250 | WT_5hasex | WT_veg | OK     | 19,5307  | 41,9838 | 1,10409       | -2,02723      | 0,0426392  | 0,158018   | no  |
| AN5879 | ChrI_A_nidulans_FGSC_A4:1933155-1934237 | WT_5hasex | WT_veg | OK     | 308,296  | 544,471 | 0,820537      | -1,59811      | 0,110019   | 0,309313   | no  |
| AN5880 | ChrI_A_nidulans_FGSC_A4:1932140-1932883 | WT_5hasex | WT_veg | OK     | 199,106  | 291,707 | 0,550984      | -1,13579      | 0,256044   | 0,52565    | no  |
| AN5881 | ChrI_A_nidulans_FGSC_A4:1930457-1931829 | WT_5hasex | WT_veg | OK     | 5,46389  | 11,8861 | 1,12127       | -1,67672      | 0,0935965  | 0,276349   | no  |
| AN5882 | ChrI_A_nidulans_FGSC_A4:1927062-1929747 | WT_5hasex | WT_veg | OK     | 11,3946  | 21,3157 | 0,903564      | -1,71171      | 0,0869502  | 0,262857   | no  |
| AN5887 | ChrI_A_nidulans_FGSC_A4:1905234-1906389 | WT_5hasex | WT_veg | NOTEST | 0,549674 | 2,85218 | 2,37542       | -2,20146      | 0,0277037  | 1          | no  |
| AN5888 | ChrI_A_nidulans_FGSC_A4:1903254-1904762 | WT_5hasex | WT_veg | OK     | 11,3998  | 12,1484 | 0,0917634     | -0,148943     | 0,881599   | 0,955047   | no  |
| AN5890 | ChrI_A_nidulans_FGSC_A4:1899523-1901155 | WT_5hasex | WT_veg | OK     | 11,6799  | 10,4058 | -0,166646     | 0,283764      | 0,776591   | 0,908721   | no  |
| AN5891 | ChrI_A_nidulans_FGSC_A4:1894017-1897125 | WT_5hasex | WT_veg | OK     | 75,6481  | 108,301 | 0,51767       | -1,00951      | 0,31273    | 0,588819   | no  |
| AN5892 | ChrI_A_nidulans_FGSC_A4:1891180-1893481 | WT_5hasex | WT_veg | OK     | 7,72532  | 18,4321 | 1,25455       | -2,2022       | 0,0276511  | 0,113891   | no  |
| AN5894 | ChrI_A_nidulans_FGSC_A4:1876249-1877810 | WT_5hasex | WT_veg | OK     | 45,0558  | 51,611  | 0,195964      | -0,395742     | 0,692296   | 0,865134   | no  |
| AN5896 | ChrI_A_nidulans_FGSC_A4:1869139-1869655 | WT_5hasex | WT_veg | NOTEST | 0,899085 | 1,87958 | 1,06388       | -0,58173      | 0,560749   | 1          | no  |
| AN5897 | ChrI_A_nidulans_FGSC_A4:1868039-1868914 | WT_5hasex | WT_veg | OK     | 88,8486  | 262,328 | 1,56195       | -3,17022      | 0,00152322 | 0,0111326  | yes |
| AN5898 | ChrI_A_nidulans_FGSC_A4:1865189-1867458 | WT_5hasex | WT_veg | OK     | 34,8716  | 47,3981 | 0,442777      | -0,894345     | 0,371137   | 0,645931   | no  |
| AN5900 | ChrI_A_nidulans_FGSC_A4:1858340-1859254 | WT_5hasex | WT_veg | OK     | 70,2465  | 84,0924 | 0,259549      | -0,524541     | 0,599903   | 0,813143   | no  |
| AN5901 | ChrI_A_nidulans_FGSC_A4:1856920-1857836 | WT_5hasex | WT_veg | OK     | 13,9735  | 20,2821 | 0,537512      | -0,852398     | 0,393993   | 0,667142   | no  |
| AN5902 | ChrI_A_nidulans_FGSC_A4:1854786-1856660 | WT_5hasex | WT_veg | OK     | 12,5136  | 10,4484 | -0,260219     | 0,462235      | 0,643913   | 0,838126   | no  |
| AN5903 | ChrI_A_nidulans_FGSC_A4:1852522-1854434 | WT_5hasex | WT_veg | OK     | 4,6485   | 5,29233 | 0,187137      | -0,261872     | 0,79342    | 0,916027   | no  |
| AN5904 | ChrI_A_nidulans_FGSC_A4:1851762-1852485 | WT_5hasex | WT_veg | OK     | 514,024  | 1911,32 | 1,89466       | -3,71794      | 0,00020085 | 0,0020006  | yes |
| AN5905 | ChrI_A_nidulans_FGSC_A4:1848740-1850692 | WT_5hasex | WT_veg | OK     | 2,12736  | 7,51742 | 1,82117       | -2,28478      | 0,0223255  | 0,0967818  | no  |
| AN5906 | ChrI_A_nidulans_FGSC_A4:1845336-1846919 | WT_5hasex | WT_veg | OK     | 71,4043  | 203,994 | 1,51444       | -3,11323      | 0,00185049 | 0,0130845  | yes |
| AN5907 | ChrI_A_nidulans_FGSC_A4:1844218-1845169 | WT_5hasex | WT_veg | OK     | 653,194  | 3578,38 | 2,45372       | -4,26759      | 1,9759E-05 | 0,00026347 | yes |
| AN5910 | ChrI_A_nidulans_FGSC_A4:1836944-1839053 | WT_5hasex | WT_veg | OK     | 16,5608  | 36,4942 | 1,1399        | -2,20912      | 0,0271661  | 0,11233    | no  |
| AN5911 | ChrI_A_nidulans_FGSC_A4:1834264-1836609 | WT_5hasex | WT_veg | OK     | 18,0119  | 54,1717 | 1,58859       | -3,15088      | 0,00162782 | 0,0117608  | yes |
| AN5913 | ChrI_A_nidulans_FGSC_A4:1830500-1832112 | WT_5hasex | WT_veg | OK     | 36,6039  | 120,376 | 1,71748       | -2,86787      | 0,0041325  | 0,0254766  | yes |
| AN5914 | ChrI_A_nidulans_FGSC_A4:1825549-1828459 | WT_5hasex | WT_veg | OK     | 2,74176  | 2,73011 | -0,00614462   | 0,00813936    | 0,993506   | 0,997612   | no  |
| AN5915 | ChrI_A_nidulans_FGSC_A4:1823834-1825208 | WT_5hasex | WT_veg | OK     | 88,2602  | 132,787 | 0,589284      | -1,20954      | 0,226455   | 0,489296   | no  |
| AN5917 | ChrI_A_nidulans_FGSC_A4:1820556-1822315 | WT_5hasex | WT_veg | OK     | 12,1405  | 28,5632 | 1,23434       | -2,19623      | 0,0280758  | 0,115228   | no  |
| AN5919 | ChrI_A_nidulans_FGSC_A4:1814028-1815898 | WT_5hasex | WT_veg | OK     | 26,1443  | 43,9808 | 0,750375      | -1,48161      | 0,138443   | 0,359873   | no  |
| AN5920 | ChrI_A_nidulans_FGSC_A4:1811216-1813641 | WT_5hasex | WT_veg | OK     | 26,5916  | 21,5487 | -0,30337      | 0,617007      | 0,53723    | 0,773894   | no  |
| AN5923 | ChrI_A_nidulans_FGSC_A4:1800975-1801597 | WT_5hasex | WT_veg | OK     | 0,61961  | 4,19056 | 2,75771       | -1,33199      | 0,182863   | 0,430455   | no  |
| AN5924 | ChrI_A_nidulans_FGSC_A4:1795929-1798282 | WT_5hasex | WT_veg | OK     | 13,4783  | 33,745  | 1,32403       | -2,44845      | 0,0143471  | 0,0691362  | no  |
| AN5926 | ChrI_A_nidulans_FGSC_A4:1787554-1789046 | WT_5hasex | WT_veg | OK     | 84,7569  | 132,429 | 0,643812      | -1,32965      | 0,183633   | 0,431549   | no  |
| AN5927 | ChrI_A_nidulans_FGSC_A4:1784691-1787231 | WT_5hasex | WT_veg | OK     | 11,7407  | 18,7226 | 0,673258      | -1,23622      | 0,216378   | 0,47645    | no  |
| AN5928 | ChrI_A_nidulans_FGSC_A4:1783572-1784179 | WT_5hasex | WT_veg | NOTEST | 0        | 1,76317 | 1.79769e+308  | 1.79769e+308  | 0,123323   | 1          | no  |
| AN5929 | ChrI_A_nidulans_FGSC_A4:1780848-1782807 | WT_5hasex | WT_veg | OK     | 19,5233  | 25,3642 | 0,377596      | -0,707581     | 0,479205   | 0,734464   | no  |
| AN5930 | ChrI_A_nidulans_FGSC_A4:1774123-1775473 | WT_5hasex | WT_veg | NOTEST | 0,587436 | 0       | -1.79769e+308 | -1.79769e+308 | 0,0780024  | 1          | no  |
| AN5931 | ChrI_A_nidulans_FGSC_A4:1770876-1773930 | WT_5hasex | WT_veg | OK     | 99,0772  | 900,034 | 3,18335       | -6,27815      | 3,4263E-10 | 1,3105E-08 | yes |
| AN5933 | ChrI_A_nidulans_FGSC_A4:1760213-1762487 | WT_5hasex | WT_veg | OK     | 11,1416  | 35,6982 | 1,6799        | -3,0283       | 0,00245933 | 0,0165818  | yes |
| AN5934 | ChrI_A_nidulans_FGSC_A4:1757084-1758242 | WT_5hasex | WT_veg | OK     | 6,16308  | 18,7007 | 1,60137       | -2,42599      | 0,0152668  | 0,0724902  | no  |
| AN5935 | ChrI_A_nidulans_FGSC_A4:1754268-1756423 | WT_5hasex | WT_veg | OK     | 148,124  | 577,22  | 1,96232       | -3,70122      | 0,00021457 | 0,00211585 | yes |
| AN5936 | ChrI_A_nidulans_FGSC_A4:1745496-1745965 | WT_5hasex | WT_veg | NOTEST | 0        | 0       | 0             | 0             | 1          | 1          | no  |
| AN5937 | ChrI_A_nidulans_FGSC_A4:1743280-1744105 | WT_5hasex | WT_veg | OK     | 2,4136   | 5,19969 | 1,10724       | -1,26263      | 0,206722   | 0,463648   | no  |
| AN5938 | ChrI_A_nidulans_FGSC_A4:1740509-1741327 | WT_5hasex | WT_veg | OK     | 4,34901  | 26,3464 | 2,59885       | -3,4474       | 0,00056602 | 0,00484158 | yes |
| AN5939 | ChrI_A_nidulans_FGSC_A4:1737725-1739572 | WT_5hasex | WT_veg | OK     | 55,6758  | 208,446 | 1,90455       | -3,01431      | 0,00257568 | 0,0172355  | yes |
| AN5940 | ChrI_A_nidulans_FGSC_A4:1734382-1734961 | WT_5hasex | WT_veg | OK     | 51,596   | 176,884 | 1,77748       | -3,07971      | 0,00207205 | 0,014389   | yes |

## Supplementary table 1

|        |                                         |           |        |        |          |          |              |              |            |            |     |
|--------|-----------------------------------------|-----------|--------|--------|----------|----------|--------------|--------------|------------|------------|-----|
| AN5941 | ChrI_A_nidulans_FGSC_A4:1729170-1731149 | WT_5hasex | WT_veg | OK     | 2,66541  | 7,40219  | 1,47359      | -2,0051      | 0,0449523  | 0,164439   | no  |
| AN5942 | ChrI_A_nidulans_FGSC_A4:1726526-1727741 | WT_5hasex | WT_veg | OK     | 68,2036  | 43,4161  | -0,651618    | 1,29653      | 0,194793   | 0,447111   | no  |
| AN5943 | ChrI_A_nidulans_FGSC_A4:1723913-1725735 | WT_5hasex | WT_veg | OK     | 17,5147  | 5,7792   | -1,59963     | 2,42434      | 0,0153362  | 0,0727209  | no  |
| AN5944 | ChrI_A_nidulans_FGSC_A4:1719131-1720934 | WT_5hasex | WT_veg | OK     | 7,55563  | 4,7439   | -0,671478    | 1,02121      | 0,307157   | 0,583191   | no  |
| AN5945 | ChrI_A_nidulans_FGSC_A4:1714840-1716244 | WT_5hasex | WT_veg | OK     | 36,7833  | 66,4467  | 0,853147     | -1,72632     | 0,0842891  | 0,257171   | no  |
| AN5946 | ChrI_A_nidulans_FGSC_A4:1712626-1714533 | WT_5hasex | WT_veg | OK     | 14,972   | 8,16962  | -0,873926    | 1,51749      | 0,129143   | 0,343786   | no  |
| AN5947 | ChrI_A_nidulans_FGSC_A4:1707272-1711587 | WT_5hasex | WT_veg | OK     | 8,41519  | 28,2479  | 1,74708      | -3,19309     | 0,00140761 | 0,0104139  | yes |
| AN5948 | ChrI_A_nidulans_FGSC_A4:1704005-1704686 | WT_5hasex | WT_veg | OK     | 14,3413  | 27,0398  | 0,914909     | -1,37568     | 0,168922   | 0,409126   | no  |
| AN5949 | ChrI_A_nidulans_FGSC_A4:1701751-1703162 | WT_5hasex | WT_veg | OK     | 23,8186  | 52,0974  | 1,12912      | -2,20132     | 0,0277131  | 0,114052   | no  |
| AN5950 | ChrI_A_nidulans_FGSC_A4:1698596-1701623 | WT_5hasex | WT_veg | OK     | 37,4528  | 47,6441  | 0,347226     | -0,719118    | 0,472068   | 0,729381   | no  |
| AN5951 | ChrI_A_nidulans_FGSC_A4:1697606-1698391 | WT_5hasex | WT_veg | OK     | 40,3816  | 69,9931  | 0,793515     | -1,45295     | 0,146238   | 0,372939   | no  |
| AN5952 | ChrI_A_nidulans_FGSC_A4:1695941-1697549 | WT_5hasex | WT_veg | OK     | 11,0498  | 26,53    | 1,26361      | -2,15128     | 0,0314543  | 0,125937   | no  |
| AN5953 | ChrI_A_nidulans_FGSC_A4:1694336-1695454 | WT_5hasex | WT_veg | OK     | 90,4366  | 246,708  | 1,44782      | -2,77927     | 0,00544815 | 0,0318631  | yes |
| AN5954 | ChrI_A_nidulans_FGSC_A4:1692000-1693644 | WT_5hasex | WT_veg | OK     | 49,1823  | 105,807  | 1,10523      | -2,27414     | 0,0229578  | 0,0988687  | no  |
| AN5955 | ChrI_A_nidulans_FGSC_A4:1688292-1690460 | WT_5hasex | WT_veg | OK     | 18,5477  | 52,1094  | 1,4903       | -2,81501     | 0,0048776  | 0,0291643  | yes |
| AN5956 | ChrI_A_nidulans_FGSC_A4:1684768-1686660 | WT_5hasex | WT_veg | OK     | 18,8971  | 46,291   | 1,29256      | -2,3668      | 0,0179428  | 0,0819879  | no  |
| AN5957 | ChrI_A_nidulans_FGSC_A4:1681073-1682672 | WT_5hasex | WT_veg | OK     | 57,7396  | 81,91    | 0,504476     | -1,03077     | 0,302648   | 0,578429   | no  |
| AN5959 | ChrI_A_nidulans_FGSC_A4:1671952-1674094 | WT_5hasex | WT_veg | OK     | 66,3023  | 245,948  | 1,89122      | -3,94579     | 7,9538E-05 | 0,00089788 | yes |
| AN5960 | ChrI_A_nidulans_FGSC_A4:1670791-1671714 | WT_5hasex | WT_veg | OK     | 986,923  | 1367,91  | 0,470961     | -0,841929    | 0,399828   | 0,67212    | no  |
| AN5961 | ChrI_A_nidulans_FGSC_A4:1668306-1670405 | WT_5hasex | WT_veg | OK     | 24,0323  | 27,1992  | 0,178588     | -0,346471    | 0,728989   | 0,885274   | no  |
| AN5962 | ChrI_A_nidulans_FGSC_A4:1665334-1666953 | WT_5hasex | WT_veg | OK     | 15,2539  | 38,5802  | 1,33868      | -2,01617     | 0,0437821  | 0,161164   | no  |
| AN5963 | ChrI_A_nidulans_FGSC_A4:1663385-1664603 | WT_5hasex | WT_veg | OK     | 14,1826  | 36,3616  | 1,35829      | -2,27053     | 0,0231752  | 0,0995758  | no  |
| AN5964 | ChrI_A_nidulans_FGSC_A4:1655899-1657714 | WT_5hasex | WT_veg | OK     | 0        | 12,1971  | 1.79769e+308 | 1.79769e+308 | 0,0149451  | 0,0713058  | no  |
| AN5965 | ChrI_A_nidulans_FGSC_A4:1654908-1655839 | WT_5hasex | WT_veg | OK     | 93,8782  | 209,576  | 1,15861      | -2,41183     | 0,0158725  | 0,0747172  | no  |
| AN5966 | ChrI_A_nidulans_FGSC_A4:1651222-1653705 | WT_5hasex | WT_veg | OK     | 33,5733  | 239,529  | 2,83481      | -5,92502     | 3,1227E-09 | 9,9474E-08 | yes |
| AN5967 | ChrI_A_nidulans_FGSC_A4:1643453-1644115 | WT_5hasex | WT_veg | OK     | 4,71485  | 5,53504  | 0,231382     | -0,271134    | 0,786288   | 0,912848   | no  |
| AN5968 | ChrI_A_nidulans_FGSC_A4:1640842-1642724 | WT_5hasex | WT_veg | OK     | 68,9454  | 64,3893  | -0,0986326   | 0,154203     | 0,87745    | 0,953138   | no  |
| AN5969 | ChrI_A_nidulans_FGSC_A4:1639510-1640409 | WT_5hasex | WT_veg | OK     | 717,588  | 927,975  | 0,370932     | -0,720309    | 0,471335   | 0,728918   | no  |
| AN5970 | ChrI_A_nidulans_FGSC_A4:1636617-1639219 | WT_5hasex | WT_veg | OK     | 62,7179  | 109,028  | 0,797745     | -1,62113     | 0,10499    | 0,299657   | no  |
| AN5971 | ChrI_A_nidulans_FGSC_A4:1635441-1636458 | WT_5hasex | WT_veg | OK     | 277,1    | 414,152  | 0,579755     | -1,17511     | 0,23995    | 0,505786   | no  |
| AN5972 | ChrI_A_nidulans_FGSC_A4:1631800-1635131 | WT_5hasex | WT_veg | OK     | 79,1411  | 96,9561  | 0,292906     | -0,593445    | 0,552883   | 0,783821   | no  |
| AN5975 | ChrI_A_nidulans_FGSC_A4:1622081-1623690 | WT_5hasex | WT_veg | OK     | 896,889  | 4772,85  | 2,41185      | -3,09075     | 0,00199655 | 0,0139543  | yes |
| AN5977 | ChrI_A_nidulans_FGSC_A4:1610027-1611416 | WT_5hasex | WT_veg | OK     | 206,879  | 357,422  | 0,78884      | -1,59303     | 0,111153   | 0,311361   | no  |
| AN5978 | ChrI_A_nidulans_FGSC_A4:1608285-1609842 | WT_5hasex | WT_veg | OK     | 84,0434  | 159,129  | 0,920991     | -1,90125     | 0,0572698  | 0,195381   | no  |
| AN5979 | ChrI_A_nidulans_FGSC_A4:1607260-1608072 | WT_5hasex | WT_veg | OK     | 2201,71  | 4136,8   | 0,909889     | -1,51913     | 0,128729   | 0,343116   | no  |
| AN5980 | ChrI_A_nidulans_FGSC_A4:1606032-1607004 | WT_5hasex | WT_veg | OK     | 21,9771  | 65,7409  | 1,58079      | -2,87138     | 0,00408685 | 0,0252249  | yes |
| AN5981 | ChrI_A_nidulans_FGSC_A4:1601436-1605200 | WT_5hasex | WT_veg | OK     | 23,4649  | 62,6603  | 1,41705      | -2,89973     | 0,00373487 | 0,0234634  | yes |
| AN5983 | ChrI_A_nidulans_FGSC_A4:1589950-1591717 | WT_5hasex | WT_veg | OK     | 24,9497  | 41,3135  | 0,727589     | -1,42426     | 0,15437    | 0,386336   | no  |
| AN5984 | ChrI_A_nidulans_FGSC_A4:1588472-1589615 | WT_5hasex | WT_veg | OK     | 14,3635  | 27,1265  | 0,917296     | -1,44961     | 0,147169   | 0,374602   | no  |
| AN5985 | ChrI_A_nidulans_FGSC_A4:1586989-1587986 | WT_5hasex | WT_veg | OK     | 1,7727   | 7,66238  | 2,11184      | -2,52592     | 0,0115397  | 0,0583509  | no  |
| AN5986 | ChrI_A_nidulans_FGSC_A4:1585354-1586666 | WT_5hasex | WT_veg | OK     | 34,5081  | 146,898  | 2,0898       | -4,04386     | 5,2579E-05 | 0,00062491 | yes |
| AN5987 | ChrI_A_nidulans_FGSC_A4:1582548-1585134 | WT_5hasex | WT_veg | NOTEST | 0,413083 | 0,699575 | 0,760049     | -0,655497    | 0,512148   | 1          | no  |
| AN5988 | ChrI_A_nidulans_FGSC_A4:1577979-1581408 | WT_5hasex | WT_veg | OK     | 18,0545  | 24,5712  | 0,444615     | -0,916852    | 0,35922    | 0,634014   | no  |
| AN5989 | ChrI_A_nidulans_FGSC_A4:1574144-1575113 | WT_5hasex | WT_veg | OK     | 77,8113  | 139,624  | 0,843499     | -1,7105      | 0,0871726  | 0,263377   | no  |
| AN5990 | ChrI_A_nidulans_FGSC_A4:1572261-1574032 | WT_5hasex | WT_veg | OK     | 8,31147  | 14,4237  | 0,795265     | -1,22742     | 0,219666   | 0,480884   | no  |
| AN5992 | ChrI_A_nidulans_FGSC_A4:1564577-1567319 | WT_5hasex | WT_veg | OK     | 28,0566  | 65,2301  | 1,2172       | -2,49254     | 0,0126832  | 0,0628371  | no  |
| AN5993 | ChrI_A_nidulans_FGSC_A4:1563595-1564194 | WT_5hasex | WT_veg | OK     | 1,5904   | 4,72365  | 1,57051      | -1,55487     | 0,119978   | 0,327658   | no  |
| AN5994 | ChrI_A_nidulans_FGSC_A4:1561061-1562440 | WT_5hasex | WT_veg | OK     | 127,839  | 470,642  | 1,8803       | -3,90796     | 9,3079E-05 | 0,00103097 | yes |
| AN5995 | ChrI_A_nidulans_FGSC_A4:1559190-1560804 | WT_5hasex | WT_veg | OK     | 43,3404  | 180,559  | 2,05869      | -4,19275     | 2,756E-05  | 0,00035536 | yes |
| AN5996 | ChrI_A_nidulans_FGSC_A4:1558136-1558939 | WT_5hasex | WT_veg | OK     | 1461,14  | 1881,72  | 0,364957     | -0,622571    | 0,533567   | 0,772123   | no  |
| AN5997 | ChrI_A_nidulans_FGSC_A4:1556972-1558041 | WT_5hasex | WT_veg | OK     | 1265,77  | 2333,41  | 0,882423     | -1,59698     | 0,110269   | 0,309797   | no  |
| AN5998 | ChrI_A_nidulans_FGSC_A4:1554946-1556578 | WT_5hasex | WT_veg | OK     | 5,67408  | 29,6131  | 2,38377      | -3,74034     | 0,00018377 | 0,00185354 | yes |
| AN5999 | ChrI_A_nidulans_FGSC_A4:1550370-1554465 | WT_5hasex | WT_veg | OK     | 44,7091  | 110,765  | 1,30886      | -2,7109      | 0,00671016 | 0,0378662  | yes |

## Supplementary table 1

|        |                                         |           |        |        |          |          |               |               |            |            |     |
|--------|-----------------------------------------|-----------|--------|--------|----------|----------|---------------|---------------|------------|------------|-----|
| AN6003 | ChrI_A_nidulans_FGSC_A4:1538325-1539939 | WT_5hasex | WT_veg | OK     | 8,04055  | 17,287   | 1,10432       | -1,80976      | 0,0703331  | 0,22636    | no  |
| AN6004 | ChrI_A_nidulans_FGSC_A4:1534832-1536146 | WT_5hasex | WT_veg | OK     | 838,469  | 2339,8   | 1,48056       | -2,52359      | 0,0116164  | 0,0586439  | no  |
| AN6005 | ChrI_A_nidulans_FGSC_A4:1534356-1534752 | WT_5hasex | WT_veg | OK     | 149,462  | 614,577  | 2,03981       | -4,12676      | 3,6791E-05 | 0,0004587  | yes |
| AN6006 | ChrI_A_nidulans_FGSC_A4:1529852-1533437 | WT_5hasex | WT_veg | OK     | 37,0457  | 142,509  | 1,94368       | -4,00671      | 6,157E-05  | 0,00071889 | yes |
| AN6007 | ChrI_A_nidulans_FGSC_A4:1525128-1529306 | WT_5hasex | WT_veg | OK     | 12,612   | 20,9023  | 0,728863      | -1,45295      | 0,146237   | 0,372939   | no  |
| AN6009 | ChrI_A_nidulans_FGSC_A4:1521532-1524336 | WT_5hasex | WT_veg | OK     | 68,4382  | 186,161  | 1,44368       | -2,98957      | 0,00279368 | 0,0184172  | yes |
| AN6011 | ChrI_A_nidulans_FGSC_A4:1516331-1516655 | WT_5hasex | WT_veg | OK     | 0,946089 | 4,40792  | 2,22005       | -0,93389      | 0,350361   | 0,625903   | no  |
| AN6012 | ChrI_A_nidulans_FGSC_A4:1513466-1515414 | WT_5hasex | WT_veg | OK     | 24,3904  | 35,1204  | 0,525997      | -1,05218      | 0,292717   | 0,567531   | no  |
| AN6013 | ChrI_A_nidulans_FGSC_A4:1512005-1513124 | WT_5hasex | WT_veg | OK     | 65,9993  | 146,015  | 1,14559       | -2,33327      | 0,0196338  | 0,087861   | no  |
| AN6015 | ChrI_A_nidulans_FGSC_A4:1502402-1504109 | WT_5hasex | WT_veg | OK     | 18,9567  | 30,4708  | 0,684723      | -1,1612       | 0,245562   | 0,513365   | no  |
| AN6016 | ChrI_A_nidulans_FGSC_A4:1495206-1495993 | WT_5hasex | WT_veg | NOTEST | 0,971372 | 2,64776  | 1,44668       | -0,796639     | 0,425661   | 1          | no  |
| AN6018 | ChrI_A_nidulans_FGSC_A4:1485721-1487342 | WT_5hasex | WT_veg | NOTEST | 1,72113  | 0,584182 | -1,55887      | 1,07068       | 0,284315   | 1          | no  |
| AN6019 | ChrI_A_nidulans_FGSC_A4:1483061-1484686 | WT_5hasex | WT_veg | NOTEST | 1,55179  | 1,31161  | -0,242597     | 0,239018      | 0,811092   | 1          | no  |
| AN6020 | ChrI_A_nidulans_FGSC_A4:1481017-1481476 | WT_5hasex | WT_veg | NOTEST | 0        | 0        | 0             | 0             | 1          | 1          | no  |
| AN6022 | ChrI_A_nidulans_FGSC_A4:1474820-1476726 | WT_5hasex | WT_veg | NOTEST | 0,278604 | 0        | -1.79769e+308 | -1.79769e+308 | 0,107729   | 1          | no  |
| AN6023 | ChrI_A_nidulans_FGSC_A4:1471420-1473455 | WT_5hasex | WT_veg | OK     | 2,13859  | 1,44433  | -0,566254     | 0,652153      | 0,514303   | 0,758955   | no  |
| AN6025 | ChrI_A_nidulans_FGSC_A4:1466379-1467329 | WT_5hasex | WT_veg | OK     | 2,18833  | 3,48027  | 0,669365      | -0,715136     | 0,474525   | 0,731174   | no  |
| AN6026 | ChrI_A_nidulans_FGSC_A4:1464055-1465789 | WT_5hasex | WT_veg | NOTEST | 0,56488  | 1,35866  | 1,26617       | -1,0515       | 0,293029   | 1          | no  |
| AN6027 | ChrI_A_nidulans_FGSC_A4:1462410-1463265 | WT_5hasex | WT_veg | NOTEST | 0,252496 | 0        | -1.79769e+308 | -1.79769e+308 | 0,165569   | 1          | no  |
| AN6028 | ChrI_A_nidulans_FGSC_A4:1460779-1462082 | WT_5hasex | WT_veg | NOTEST | 0        | 0        | 0             | 0             | 1          | 1          | no  |
| AN6029 | ChrI_A_nidulans_FGSC_A4:1459557-1460511 | WT_5hasex | WT_veg | NOTEST | 0,950306 | 1,02347  | 0,10701       | -0,066092     | 0,947305   | 1          | no  |
| AN6030 | ChrI_A_nidulans_FGSC_A4:1457136-1459502 | WT_5hasex | WT_veg | OK     | 2,57418  | 3,7926   | 0,559078      | -0,65933      | 0,509684   | 0,756023   | no  |
| AN6031 | ChrI_A_nidulans_FGSC_A4:1454609-1456009 | WT_5hasex | WT_veg | OK     | 55,9053  | 71,1     | 0,346865      | -0,711511     | 0,476768   | 0,732699   | no  |
| AN6032 | ChrI_A_nidulans_FGSC_A4:1452229-1453894 | WT_5hasex | WT_veg | OK     | 20,0806  | 133,35   | 2,73135       | -5,15839      | 2,4909E-07 | 5,2909E-06 | yes |
| AN6033 | ChrI_A_nidulans_FGSC_A4:1450304-1452162 | WT_5hasex | WT_veg | OK     | 71,0411  | 133,459  | 0,909667      | -1,88474      | 0,0594652  | 0,201064   | no  |
| AN6034 | ChrI_A_nidulans_FGSC_A4:1448688-1449862 | WT_5hasex | WT_veg | OK     | 22,9929  | 29,0054  | 0,335134      | -0,592926     | 0,553231   | 0,784028   | no  |
| AN6035 | ChrI_A_nidulans_FGSC_A4:1447056-1448683 | WT_5hasex | WT_veg | OK     | 4,80602  | 8,24168  | 0,778094      | -1,13687      | 0,255591   | 0,524912   | no  |
| AN6036 | ChrI_A_nidulans_FGSC_A4:1443887-1446778 | WT_5hasex | WT_veg | OK     | 17,1313  | 34,2222  | 0,998296      | -2,01751      | 0,0436425  | 0,160827   | no  |
| AN6038 | ChrI_A_nidulans_FGSC_A4:1439143-1440479 | WT_5hasex | WT_veg | OK     | 15,6754  | 13,6927  | -0,195094     | 0,333043      | 0,739102   | 0,890437   | no  |
| AN6039 | ChrI_A_nidulans_FGSC_A4:1438169-1438944 | WT_5hasex | WT_veg | OK     | 78,5875  | 127,861  | 0,70221       | -1,40489      | 0,160054   | 0,395583   | no  |
| AN6040 | ChrI_A_nidulans_FGSC_A4:1437483-1437999 | WT_5hasex | WT_veg | OK     | 41,2481  | 80,9275  | 0,972304      | -1,69134      | 0,0907723  | 0,270618   | no  |
| AN6041 | ChrI_A_nidulans_FGSC_A4:1435683-1437313 | WT_5hasex | WT_veg | OK     | 20,9642  | 24,2493  | 0,210019      | -0,397607     | 0,69092    | 0,864157   | no  |
| AN6042 | ChrI_A_nidulans_FGSC_A4:1433841-1435309 | WT_5hasex | WT_veg | OK     | 25,3828  | 52,6065  | 1,05139       | -2,0262       | 0,042744   | 0,158317   | no  |
| AN6043 | ChrI_A_nidulans_FGSC_A4:1432103-1433290 | WT_5hasex | WT_veg | OK     | 7,12907  | 9,16797  | 0,362889      | -0,525917     | 0,598946   | 0,812631   | no  |
| AN6045 | ChrI_A_nidulans_FGSC_A4:1428734-1429830 | WT_5hasex | WT_veg | OK     | 164,213  | 335,869  | 1,03233       | -2,09486      | 0,0361833  | 0,14018    | no  |
| AN6046 | ChrI_A_nidulans_FGSC_A4:1425338-1427038 | WT_5hasex | WT_veg | OK     | 35,2005  | 77,3107  | 1,13507       | -2,00265      | 0,0452149  | 0,165135   | no  |
| AN6047 | ChrI_A_nidulans_FGSC_A4:1423724-1425031 | WT_5hasex | WT_veg | OK     | 18,5825  | 35,2208  | 0,92248       | -1,66206      | 0,0965005  | 0,282204   | no  |
| AN6048 | ChrI_A_nidulans_FGSC_A4:1421575-1423616 | WT_5hasex | WT_veg | OK     | 484,409  | 813,358  | 0,747666      | -1,31735      | 0,187722   | 0,437415   | no  |
| AN6049 | ChrI_A_nidulans_FGSC_A4:1418203-1420353 | WT_5hasex | WT_veg | OK     | 48,5061  | 71,3919  | 0,557595      | -1,10899      | 0,267436   | 0,539193   | no  |
| AN6050 | ChrI_A_nidulans_FGSC_A4:1411157-1413262 | WT_5hasex | WT_veg | OK     | 36,1909  | 67,0174  | 0,888909      | -1,66558      | 0,0957974  | 0,280964   | no  |
| AN6051 | ChrI_A_nidulans_FGSC_A4:1408898-1410414 | WT_5hasex | WT_veg | OK     | 1,32554  | 3,94593  | 1,57378       | -1,66181      | 0,09655    | 0,782302   | no  |
| AN6052 | ChrI_A_nidulans_FGSC_A4:1405679-1406497 | WT_5hasex | WT_veg | OK     | 15,8154  | 39,1455  | 1,30752       | -1,96523      | 0,0493881  | 0,176093   | no  |
| AN6053 | ChrI_A_nidulans_FGSC_A4:1401786-1404687 | WT_5hasex | WT_veg | OK     | 47,0117  | 104,535  | 1,15289       | -2,41373      | 0,0157904  | 0,074424   | no  |
| AN6054 | ChrI_A_nidulans_FGSC_A4:1400494-1401627 | WT_5hasex | WT_veg | OK     | 61,9477  | 91,4145  | 0,561373      | -1,14165      | 0,253598   | 0,522923   | no  |
| AN6055 | ChrI_A_nidulans_FGSC_A4:1397509-1399980 | WT_5hasex | WT_veg | OK     | 20,433   | 15,1032  | -0,436044     | 0,857518      | 0,391159   | 0,66436    | no  |
| AN6056 | ChrI_A_nidulans_FGSC_A4:1395449-1397172 | WT_5hasex | WT_veg | NOTEST | 0        | 0        | 0             | 0             | 1          | 1          | no  |
| AN6058 | ChrI_A_nidulans_FGSC_A4:1391695-1392894 | WT_5hasex | WT_veg | OK     | 825,535  | 1231,45  | 0,57696       | -0,935189     | 0,349691   | 0,625207   | no  |
| AN6059 | ChrI_A_nidulans_FGSC_A4:1389796-1390836 | WT_5hasex | WT_veg | OK     | 101,413  | 297,609  | 1,55318       | -3,23917      | 0,00119877 | 0,00911596 | yes |
| AN6060 | ChrI_A_nidulans_FGSC_A4:1382777-1388362 | WT_5hasex | WT_veg | OK     | 58,3494  | 327,547  | 2,48891       | -4,89959      | 9,6039E-07 | 1,7672E-05 | yes |
| AN6061 | ChrI_A_nidulans_FGSC_A4:1380272-1381726 | WT_5hasex | WT_veg | OK     | 81,3675  | 47,3791  | -0,780204     | 1,59335       | 0,111081   | 0,311238   | no  |
| AN6062 | ChrI_A_nidulans_FGSC_A4:1376994-1379338 | WT_5hasex | WT_veg | OK     | 23,0168  | 39,6948  | 0,78626       | -1,5725       | 0,115834   | 0,319758   | no  |
| AN6063 | ChrI_A_nidulans_FGSC_A4:1372901-1374513 | WT_5hasex | WT_veg | NOTEST | 0,977634 | 2,82518  | 1,53097       | -1,67036      | 0,0948474  | 1          | no  |
| AN6064 | ChrI_A_nidulans_FGSC_A4:1371553-1372543 | WT_5hasex | WT_veg | OK     | 71,2042  | 131,382  | 0,883727      | -1,78954      | 0,0735287  | 0,233306   | no  |

## Supplementary table 1

|        |                                         |           |        |        |          |         |               |               |            |            |     |
|--------|-----------------------------------------|-----------|--------|--------|----------|---------|---------------|---------------|------------|------------|-----|
| AN6065 | ChrI_A_nidulans_FGSC_A4:1368923-1370632 | WT_5hasex | WT_veg | OK     | 13,9753  | 11,9854 | -0,221605     | 0,393947      | 0,69362    | 0,865712   | no  |
| AN6066 | ChrI_A_nidulans_FGSC_A4:1367857-1368694 | WT_5hasex | WT_veg | OK     | 85,549   | 188,757 | 1,14171       | -2,2124       | 0,0269392  | 0,111621   | no  |
| AN6067 | ChrI_A_nidulans_FGSC_A4:1365444-1367514 | WT_5hasex | WT_veg | OK     | 194,758  | 547,519 | 1,49123       | -2,87453      | 0,00404633 | 0,0250013  | yes |
| AN6068 | ChrI_A_nidulans_FGSC_A4:1361627-1365268 | WT_5hasex | WT_veg | OK     | 12,7547  | 14,4742 | 0,182453      | -0,354183     | 0,723202   | 0,882086   | no  |
| AN6069 | ChrI_A_nidulans_FGSC_A4:1358141-1361172 | WT_5hasex | WT_veg | OK     | 24,7768  | 46,8988 | 0,920563      | -1,8859       | 0,0593085  | 0,200742   | no  |
| AN6070 | ChrI_A_nidulans_FGSC_A4:1350607-1353881 | WT_5hasex | WT_veg | OK     | 16,0507  | 49,5345 | 1,6258        | -3,26721      | 0,00108614 | 0,00841079 | yes |
| AN6071 | ChrI_A_nidulans_FGSC_A4:1345207-1349123 | WT_5hasex | WT_veg | OK     | 76,4584  | 202,067 | 1,40209       | -2,3627       | 0,0181422  | 0,0826038  | no  |
| AN6072 | ChrI_A_nidulans_FGSC_A4:1343385-1344938 | WT_5hasex | WT_veg | OK     | 17,6221  | 32,1236 | 0,86625       | -1,58684      | 0,112549   | 0,313891   | no  |
| AN6074 | ChrI_A_nidulans_FGSC_A4:1340414-1341724 | WT_5hasex | WT_veg | OK     | 56,556   | 82,3541 | 0,542161      | -1,11029      | 0,266875   | 0,538525   | no  |
| AN6075 | ChrI_A_nidulans_FGSC_A4:1337086-1339286 | WT_5hasex | WT_veg | OK     | 48,2757  | 72,1529 | 0,579759      | -1,19863      | 0,230674   | 0,494569   | no  |
| AN6076 | ChrI_A_nidulans_FGSC_A4:1329130-1336564 | WT_5hasex | WT_veg | NOTEST | 1,33065  | 2,32815 | 0,807046      | -1,25417      | 0,209781   | 1          | no  |
| AN6077 | ChrI_A_nidulans_FGSC_A4:1327753-1328743 | WT_5hasex | WT_veg | OK     | 190,774  | 319,385 | 0,743431      | -1,53999      | 0,123564   | 0,333745   | no  |
| AN6080 | ChrI_A_nidulans_FGSC_A4:1318631-1319598 | WT_5hasex | WT_veg | OK     | 126,082  | 216,984 | 0,783226      | -1,61222      | 0,106915   | 0,303563   | no  |
| AN6081 | ChrI_A_nidulans_FGSC_A4:1315785-1318054 | WT_5hasex | WT_veg | OK     | 27,0146  | 55,169  | 1,03012       | -2,10163      | 0,0355859  | 0,138377   | no  |
| AN6082 | ChrI_A_nidulans_FGSC_A4:1314343-1315059 | WT_5hasex | WT_veg | OK     | 1491,32  | 2908,52 | 0,963694      | -1,72448      | 0,0846219  | 0,257916   | no  |
| AN6083 | ChrI_A_nidulans_FGSC_A4:1312983-1314053 | WT_5hasex | WT_veg | OK     | 1091,43  | 2330,63 | 1,0945        | -1,91938      | 0,0549364  | 0,189668   | no  |
| AN6084 | ChrI_A_nidulans_FGSC_A4:1309343-1312146 | WT_5hasex | WT_veg | OK     | 394,568  | 284,755 | -0,470557     | 0,834097      | 0,404226   | 0,675455   | no  |
| AN6085 | ChrI_A_nidulans_FGSC_A4:1305960-1308504 | WT_5hasex | WT_veg | OK     | 15,7136  | 45,756  | 1,54195       | -2,98319      | 0,00285257 | 0,0187295  | yes |
| AN6086 | ChrI_A_nidulans_FGSC_A4:1303725-1305489 | WT_5hasex | WT_veg | OK     | 43,3051  | 101,856 | 1,23393       | -2,52585      | 0,011542   | 0,0583509  | no  |
| AN6087 | ChrI_A_nidulans_FGSC_A4:1301585-1303531 | WT_5hasex | WT_veg | OK     | 100,222  | 147,359 | 0,556133      | -1,00953      | 0,31272    | 0,588819   | no  |
| AN6088 | ChrI_A_nidulans_FGSC_A4:1297006-1301127 | WT_5hasex | WT_veg | OK     | 28,2998  | 48,2088 | 0,768504      | -1,52258      | 0,127865   | 0,341507   | no  |
| AN6089 | ChrI_A_nidulans_FGSC_A4:1294343-1296761 | WT_5hasex | WT_veg | OK     | 279,384  | 726,154 | 1,37802       | -2,37565      | 0,0175182  | 0,0805114  | no  |
| AN6090 | ChrI_A_nidulans_FGSC_A4:1288700-1291368 | WT_5hasex | WT_veg | OK     | 15,8546  | 24,8204 | 0,646627      | -1,23579      | 0,216536   | 0,476588   | no  |
| AN6091 | ChrI_A_nidulans_FGSC_A4:1285176-1287740 | WT_5hasex | WT_veg | OK     | 288,436  | 236,665 | -0,285409     | 0,531724      | 0,594917   | 0,809869   | no  |
| AN6092 | ChrI_A_nidulans_FGSC_A4:1281951-1284453 | WT_5hasex | WT_veg | OK     | 30,0374  | 76,1698 | 1,34246       | -2,71137      | 0,00670065 | 0,0378289  | yes |
| AN6094 | ChrI_A_nidulans_FGSC_A4:1277597-1278669 | WT_5hasex | WT_veg | OK     | 21,6003  | 32,412  | 0,585474      | -1,01969      | 0,307877   | 0,583865   | no  |
| AN6095 | ChrI_A_nidulans_FGSC_A4:1275658-1277401 | WT_5hasex | WT_veg | OK     | 13,6426  | 34,6343 | 1,34408       | -2,39004      | 0,0168466  | 0,0782442  | no  |
| AN6096 | ChrI_A_nidulans_FGSC_A4:1272105-1273035 | WT_5hasex | WT_veg | NOTEST | 1,55674  | 1,40035 | -0,152743     | 0,102816      | 0,918109   | 1          | no  |
| AN6097 | ChrI_A_nidulans_FGSC_A4:1270466-1271842 | WT_5hasex | WT_veg | NOTEST | 0,17087  | 0       | -1.79769e+308 | -1.79769e+308 | 0,23809    | 1          | no  |
| AN6098 | ChrI_A_nidulans_FGSC_A4:1268520-1270126 | WT_5hasex | WT_veg | NOTEST | 0,238137 | 0       | -1.79769e+308 | -1.79769e+308 | 0,224063   | 1          | no  |
| AN6099 | ChrI_A_nidulans_FGSC_A4:1265627-1267903 | WT_5hasex | WT_veg | OK     | 1,57269  | 4,66578 | 1,56888       | -1,87927      | 0,0602077  | 0,202777   | no  |
| AN6100 | ChrI_A_nidulans_FGSC_A4:1263198-1265165 | WT_5hasex | WT_veg | OK     | 2,03011  | 6,18971 | 1,60831       | -2,00061      | 0,0454344  | 0,165717   | no  |
| AN6103 | ChrI_A_nidulans_FGSC_A4:1253611-1255268 | WT_5hasex | WT_veg | NOTEST | 0,626031 | 1,68651 | 1,42973       | -1,16442      | 0,244255   | 1          | no  |
| AN6104 | ChrI_A_nidulans_FGSC_A4:1247184-1248592 | WT_5hasex | WT_veg | OK     | 137,29   | 1137,41 | 3,05045       | -5,76232      | 8,2965E-09 | 2,4479E-07 | yes |
| AN6105 | ChrI_A_nidulans_FGSC_A4:1243479-1244101 | WT_5hasex | WT_veg | OK     | 58,7942  | 133,571 | 1,18386       | -2,13568      | 0,0327058  | 0,129696   | no  |
| AN6108 | ChrI_A_nidulans_FGSC_A4:1231936-1232662 | WT_5hasex | WT_veg | OK     | 16,8171  | 34,2649 | 1,0268        | -1,67796      | 0,0933546  | 0,27592    | no  |
| AN6109 | ChrI_A_nidulans_FGSC_A4:1230677-1231299 | WT_5hasex | WT_veg | OK     | 69,9088  | 145,026 | 1,05277       | -1,90564      | 0,0566973  | 0,193971   | no  |
| AN6110 | ChrI_A_nidulans_FGSC_A4:1229393-1230337 | WT_5hasex | WT_veg | OK     | 64,0949  | 171,917 | 1,42343       | -2,85094      | 0,00435898 | 0,0266347  | yes |
| AN6111 | ChrI_A_nidulans_FGSC_A4:1228182-1229231 | WT_5hasex | WT_veg | OK     | 73,0001  | 216,048 | 1,56538       | -3,15856      | 0,00158552 | 0,0115076  | yes |
| AN6112 | ChrI_A_nidulans_FGSC_A4:1223342-1227523 | WT_5hasex | WT_veg | OK     | 28,5877  | 75,1297 | 1,39399       | -2,91017      | 0,00361236 | 0,0228222  | yes |
| AN6113 | ChrI_A_nidulans_FGSC_A4:1221287-1222771 | WT_5hasex | WT_veg | OK     | 8,76251  | 8,2409  | -0,088541     | 0,134888      | 0,8927     | 0,959154   | no  |
| AN6114 | ChrI_A_nidulans_FGSC_A4:1218735-1220782 | WT_5hasex | WT_veg | OK     | 3,91075  | 4,70821 | 0,267732      | -0,369935     | 0,711431   | 0,876014   | no  |
| AN6115 | ChrI_A_nidulans_FGSC_A4:1216584-1218276 | WT_5hasex | WT_veg | OK     | 24,0033  | 30,4227 | 0,341918      | -0,607087     | 0,543793   | 0,778191   | no  |
| AN6116 | ChrI_A_nidulans_FGSC_A4:1214810-1215806 | WT_5hasex | WT_veg | OK     | 9,72039  | 46,183  | 2,24827       | -3,16306      | 0,00156123 | 0,0113595  | yes |
| AN6117 | ChrI_A_nidulans_FGSC_A4:1210837-1211471 | WT_5hasex | WT_veg | OK     | 3,69866  | 4,02533 | 0,122103      | -0,117964     | 0,906096   | 0,964044   | no  |
| AN6119 | ChrI_A_nidulans_FGSC_A4:1204682-1206612 | WT_5hasex | WT_veg | OK     | 47,2298  | 96,4981 | 1,0308        | -2,13885      | 0,0324474  | 0,128919   | no  |
| AN6120 | ChrI_A_nidulans_FGSC_A4:1198843-1203045 | WT_5hasex | WT_veg | OK     | 13,2996  | 27,7696 | 1,06212       | -2,13071      | 0,0331132  | 0,130919   | no  |
| AN6121 | ChrI_A_nidulans_FGSC_A4:1194688-1197963 | WT_5hasex | WT_veg | OK     | 1,77592  | 4,07261 | 1,19739       | -1,73064      | 0,0835166  | 0,255499   | no  |
| AN6122 | ChrI_A_nidulans_FGSC_A4:1192395-1193876 | WT_5hasex | WT_veg | OK     | 28,3141  | 71,1494 | 1,32933       | -2,52501      | 0,0115696  | 0,058447   | no  |
| AN6123 | ChrI_A_nidulans_FGSC_A4:1190759-1192308 | WT_5hasex | WT_veg | OK     | 14,1283  | 39,9606 | 1,49999       | -2,73535      | 0,00623148 | 0,0356253  | yes |
| AN6124 | ChrI_A_nidulans_FGSC_A4:1188312-1189650 | WT_5hasex | WT_veg | OK     | 24,1625  | 34,3207 | 0,506311      | -0,954965     | 0,339595   | 0,615537   | no  |
| AN6127 | ChrI_A_nidulans_FGSC_A4:1167102-1167915 | WT_5hasex | WT_veg | OK     | 21,0048  | 67,0759 | 1,67507       | -2,53834      | 0,0111379  | 0,0567005  | no  |
| AN6128 | ChrI_A_nidulans_FGSC_A4:1165559-1167047 | WT_5hasex | WT_veg | OK     | 20,4109  | 5,33294 | -1,93633      | 3,22061       | 0,00127918 | 0,00961716 | yes |



## Supplementary table 1

|        |                                         |           |        |        |           |          |               |               |            |            |     |
|--------|-----------------------------------------|-----------|--------|--------|-----------|----------|---------------|---------------|------------|------------|-----|
| AN6129 | ChrI_A_nidulans_FGSC_A4:1161117-1163391 | WT_5hasex | WT_veg | NOTEST | 0,631339  | 0,788992 | 0,321595      | -0,277915     | 0,781077   | 1          | no  |
| AN6130 | ChrI_A_nidulans_FGSC_A4:1152081-1154174 | WT_5hasex | WT_veg | NOTEST | 1,07863   | 0,533617 | -1,01533      | 0,829446      | 0,406852   | 1          | no  |
| AN6132 | ChrI_A_nidulans_FGSC_A4:1139168-1143308 | WT_5hasex | WT_veg | OK     | 39,148    | 95,081   | 1,28022       | -2,6693       | 0,00760084 | 0,0418513  | yes |
| AN6133 | ChrI_A_nidulans_FGSC_A4:1136530-1138123 | WT_5hasex | WT_veg | NOTEST | 0,914855  | 1,89106  | 1,04758       | -1,11487      | 0,264908   | 1          | no  |
| AN6134 | ChrI_A_nidulans_FGSC_A4:1130920-1136083 | WT_5hasex | WT_veg | NOTEST | 0,0834926 | 0        | -1.79769e+308 | -1.79769e+308 | 0,107729   | 1          | no  |
| AN6135 | ChrI_A_nidulans_FGSC_A4:1128479-1129585 | WT_5hasex | WT_veg | OK     | 4,22962   | 8,74403  | 1,04777       | -1,18271      | 0,236924   | 0,502317   | no  |
| AN6136 | ChrI_A_nidulans_FGSC_A4:1123096-1127865 | WT_5hasex | WT_veg | OK     | 21,9843   | 27,9523  | 0,346494      | -0,72248      | 0,47       | 0,728025   | no  |
| AN6137 | ChrI_A_nidulans_FGSC_A4:1117870-1120792 | WT_5hasex | WT_veg | OK     | 82,5368   | 184,858  | 1,16331       | -2,04594      | 0,0407619  | 0,152867   | no  |
| AN6139 | ChrI_A_nidulans_FGSC_A4:1111708-1112633 | WT_5hasex | WT_veg | OK     | 55,1963   | 118,965  | 1,10789       | -2,21296      | 0,0269002  | 0,111522   | no  |
| AN6141 | ChrI_A_nidulans_FGSC_A4:1108768-1109756 | WT_5hasex | WT_veg | OK     | 31,5168   | 37,2997  | 0,24304       | -0,453749     | 0,650009   | 0,841593   | no  |
| AN6142 | ChrI_A_nidulans_FGSC_A4:1107927-1108687 | WT_5hasex | WT_veg | OK     | 55,8784   | 114,547  | 1,03558       | -1,95513      | 0,0505673  | 0,17897    | no  |
| AN6144 | ChrI_A_nidulans_FGSC_A4:1102634-1103425 | WT_5hasex | WT_veg | OK     | 0,944806  | 12,6402  | 3,74186       | -3,57304      | 0,00035287 | 0,00323041 | yes |
| AN6146 | ChrI_A_nidulans_FGSC_A4:1099098-1099753 | WT_5hasex | WT_veg | OK     | 153,01    | 216,397  | 0,500058      | -1,02199      | 0,306784   | 0,582859   | no  |
| AN6147 | ChrI_A_nidulans_FGSC_A4:1096634-1098620 | WT_5hasex | WT_veg | OK     | 11,3197   | 16,707   | 0,561622      | -0,999997     | 0,317312   | 0,593574   | no  |
| AN6148 | ChrI_A_nidulans_FGSC_A4:1094658-1096092 | WT_5hasex | WT_veg | NOTEST | 0,344298  | 0,980482 | 1,50983       | -1,09293      | 0,274424   | 1          | no  |
| AN6149 | ChrI_A_nidulans_FGSC_A4:1091592-1093622 | WT_5hasex | WT_veg | OK     | 12,5224   | 51,1849  | 2,03121       | -3,72009      | 0,00019915 | 0,00198556 | yes |
| AN6150 | ChrI_A_nidulans_FGSC_A4:1085945-1090679 | WT_5hasex | WT_veg | OK     | 32,1161   | 45,9847  | 0,517857      | -1,03526      | 0,300549   | 0,576225   | no  |
| AN6151 | ChrI_A_nidulans_FGSC_A4:1081679-1082504 | WT_5hasex | WT_veg | NOTEST | 1,10776   | 1,7566   | 0,665142      | -0,56672      | 0,570905   | 1          | no  |
| AN6153 | ChrI_A_nidulans_FGSC_A4:1073270-1074061 | WT_5hasex | WT_veg | NOTEST | 0         | 0        | 0             | 0             | 1          | 1          | no  |
| AN6154 | ChrI_A_nidulans_FGSC_A4:1070597-1071875 | WT_5hasex | WT_veg | NOTEST | 0,137403  | 0,640622 | 2,22106       | -1,14626      | 0,251686   | 1          | no  |
| AN6155 | ChrI_A_nidulans_FGSC_A4:1068048-1068906 | WT_5hasex | WT_veg | OK     | 2,22192   | 0        | -1.79769e+308 | -1.79769e+308 | 0,0296488  | 0,120271   | no  |
| AN6156 | ChrI_A_nidulans_FGSC_A4:1065165-1066801 | WT_5hasex | WT_veg | OK     | 7,05466   | 12,0119  | 0,767816      | -1,20742      | 0,227269   | 0,490218   | no  |
| AN6158 | ChrI_A_nidulans_FGSC_A4:1061945-1062883 | WT_5hasex | WT_veg | OK     | 109,656   | 58,1945  | -0,91403      | 1,81441       | 0,0696139  | 0,224591   | no  |
| AN6159 | ChrI_A_nidulans_FGSC_A4:1060126-1061652 | WT_5hasex | WT_veg | OK     | 15,2799   | 28,8543  | 0,917151      | -1,57598      | 0,115031   | 0,31836    | no  |
| AN6160 | ChrI_A_nidulans_FGSC_A4:1057331-1059444 | WT_5hasex | WT_veg | OK     | 26,7825   | 37,3055  | 0,4781        | -0,950506     | 0,341855   | 0,61744    | no  |
| AN6161 | ChrI_A_nidulans_FGSC_A4:1054054-1056328 | WT_5hasex | WT_veg | OK     | 11,5568   | 9,13326  | -0,339535     | 0,603114      | 0,546433   | 0,779925   | no  |
| AN6162 | ChrI_A_nidulans_FGSC_A4:1052929-1053898 | WT_5hasex | WT_veg | OK     | 8,24058   | 6,4452   | -0,354522     | 0,495721      | 0,620092   | 0,824469   | no  |
| AN6163 | ChrI_A_nidulans_FGSC_A4:1051503-1052056 | WT_5hasex | WT_veg | OK     | 5,43562   | 20,1575  | 1,8908        | -2,13616      | 0,0326667  | 0,129586   | no  |
| AN6164 | ChrI_A_nidulans_FGSC_A4:1042470-1050676 | WT_5hasex | WT_veg | OK     | 8,38591   | 28,5702  | 1,76847       | -3,57726      | 0,00034721 | 0,00318587 | yes |
| AN6165 | ChrI_A_nidulans_FGSC_A4:1039832-1041740 | WT_5hasex | WT_veg | OK     | 27,5165   | 110,477  | 2,00537       | -4,05148      | 5,0896E-05 | 0,00060766 | yes |
| AN6166 | ChrI_A_nidulans_FGSC_A4:1037691-1039495 | WT_5hasex | WT_veg | OK     | 52,5141   | 247,712  | 2,23789       | -4,64639      | 3,378E-06  | 5,4634E-05 | yes |
| AN6167 | ChrI_A_nidulans_FGSC_A4:1035229-1036744 | WT_5hasex | WT_veg | OK     | 15,3248   | 30,2519  | 0,981159      | -1,67939      | 0,0930766  | 0,275352   | no  |
| AN6169 | ChrI_A_nidulans_FGSC_A4:1026739-1029138 | WT_5hasex | WT_veg | OK     | 219,752   | 542,877  | 1,30475       | -2,47159      | 0,0134513  | 0,0657535  | no  |
| AN6170 | ChrI_A_nidulans_FGSC_A4:1024990-1026401 | WT_5hasex | WT_veg | OK     | 66,6342   | 64,2787  | -0,0519211    | 0,106899      | 0,914869   | 0,967482   | no  |
| AN6171 | ChrI_A_nidulans_FGSC_A4:1024067-1024816 | WT_5hasex | WT_veg | OK     | 25,9039   | 218,809  | 3,07843       | -5,16958      | 2,3462E-07 | 5,0199E-06 | yes |
| AN6172 | ChrI_A_nidulans_FGSC_A4:1022533-1023772 | WT_5hasex | WT_veg | OK     | 20,5013   | 40,253   | 0,97338       | -1,69832      | 0,0894467  | 0,26804    | no  |
| AN6173 | ChrI_A_nidulans_FGSC_A4:1018833-1021326 | WT_5hasex | WT_veg | OK     | 5,41224   | 9,56891  | 0,822128      | -1,34662      | 0,178102   | 0,423242   | no  |
| AN6174 | ChrI_A_nidulans_FGSC_A4:1016819-1018580 | WT_5hasex | WT_veg | OK     | 19,9183   | 33,1736  | 0,735943      | -1,40071      | 0,161301   | 0,397048   | no  |
| AN6175 | ChrI_A_nidulans_FGSC_A4:1015309-1016372 | WT_5hasex | WT_veg | OK     | 28,3448   | 82,7807  | 1,54621       | -2,95306      | 0,00314645 | 0,0203405  | yes |
| AN6176 | ChrI_A_nidulans_FGSC_A4:1014712-1015236 | WT_5hasex | WT_veg | OK     | 79,1893   | 145,981  | 0,882403      | -1,65388      | 0,0981513  | 0,285534   | no  |
| AN6177 | ChrI_A_nidulans_FGSC_A4:1011902-1013569 | WT_5hasex | WT_veg | OK     | 3,2263    | 4,97903  | 0,625981      | -0,855119     | 0,392485   | 0,665836   | no  |
| AN6178 | ChrI_A_nidulans_FGSC_A4:1010112-1011169 | WT_5hasex | WT_veg | OK     | 28,649    | 72,4198  | 1,3379        | -2,49815      | 0,0124844  | 0,0620691  | no  |
| AN6179 | ChrI_A_nidulans_FGSC_A4:1009035-1009787 | WT_5hasex | WT_veg | OK     | 182,14    | 169,022  | -0,107844     | 0,220156      | 0,82575    | 0,930558   | no  |
| AN6180 | ChrI_A_nidulans_FGSC_A4:1007444-1008560 | WT_5hasex | WT_veg | OK     | 14,5644   | 22,4334  | 0,623199      | -0,970694     | 0,331701   | 0,608053   | no  |
| AN6181 | ChrI_A_nidulans_FGSC_A4:1006090-1007199 | WT_5hasex | WT_veg | OK     | 2464,52   | 3601,92  | 0,547456      | -0,894252     | 0,371187   | 0,645974   | no  |
| AN6183 | ChrI_A_nidulans_FGSC_A4:1002629-1003914 | WT_5hasex | WT_veg | OK     | 65,2536   | 160,553  | 1,29892       | -2,68115      | 0,00733701 | 0,0406679  | yes |
| AN6186 | ChrI_A_nidulans_FGSC_A4:993227-996118   | WT_5hasex | WT_veg | OK     | 6,02469   | 12,224   | 1,02076       | -1,76122      | 0,0782005  | 0,243891   | no  |
| AN6187 | ChrI_A_nidulans_FGSC_A4:991015-993059   | WT_5hasex | WT_veg | OK     | 6,56239   | 18,103   | 1,46393       | -2,38865      | 0,0169103  | 0,0784746  | no  |
| AN6188 | ChrI_A_nidulans_FGSC_A4:990095-990946   | WT_5hasex | WT_veg | OK     | 52,9051   | 118,616  | 1,16482       | -2,29851      | 0,0215328  | 0,0942264  | no  |
| AN6189 | ChrI_A_nidulans_FGSC_A4:989136-989731   | WT_5hasex | WT_veg | OK     | 22,2154   | 24,1113  | 0,118147      | -0,184003     | 0,854011   | 0,94288    | no  |
| AN6190 | ChrI_A_nidulans_FGSC_A4:987243-988764   | WT_5hasex | WT_veg | OK     | 35,8864   | 45,1286  | 0,330602      | -0,667062     | 0,504732   | 0,752846   | no  |
| AN6191 | ChrI_A_nidulans_FGSC_A4:985278-986892   | WT_5hasex | WT_veg | OK     | 44,798    | 92,7338  | 1,04966       | -2,13133      | 0,0330618  | 0,130765   | no  |
| AN6192 | ChrI_A_nidulans_FGSC_A4:981028-984487   | WT_5hasex | WT_veg | OK     | 19,756    | 180,708  | 3,19329       | -6,24517      | 4,2335E-10 | 1,5926E-08 | yes |

## Supplementary table 1

|        |                                       |           |        |    |         |          |           |           |            |            |     |
|--------|---------------------------------------|-----------|--------|----|---------|----------|-----------|-----------|------------|------------|-----|
| AN6193 | ChrI_A_nidulans_FGSC_A4:975355-979261 | WT_5hasex | WT_veg | OK | 50,7089 | 66,9816  | 0,401526  | -0,801175 | 0,423031   | 0,691065   | no  |
| AN6196 | ChrI_A_nidulans_FGSC_A4:955885-956784 | WT_5hasex | WT_veg | OK | 18,6326 | 90,0468  | 2,27285   | -3,87     | 0,00010884 | 0,00118225 | yes |
| AN6198 | ChrI_A_nidulans_FGSC_A4:951250-952009 | WT_5hasex | WT_veg | OK | 16,5508 | 34,5577  | 1,0621    | -1,72992  | 0,0836439  | 0,255747   | no  |
| AN6199 | ChrI_A_nidulans_FGSC_A4:949459-950169 | WT_5hasex | WT_veg | OK | 64,5741 | 61,1629  | -0,0783   | 0,148556  | 0,881904   | 0,95519    | no  |
| AN6200 | ChrI_A_nidulans_FGSC_A4:944626-948705 | WT_5hasex | WT_veg | OK | 9,13657 | 52,7953  | 2,53068   | -4,85324  | 1,2146E-06 | 2,1842E-05 | yes |
| AN6201 | ChrI_A_nidulans_FGSC_A4:942264-943353 | WT_5hasex | WT_veg | OK | 11,2336 | 29,6186  | 1,39869   | -2,26307  | 0,0236315  | 0,101006   | no  |
| AN6203 | ChrI_A_nidulans_FGSC_A4:926991-927705 | WT_5hasex | WT_veg | OK | 209,127 | 2332,74  | 3,47958   | -7,04959  | 1,7946E-12 | 9,6549E-11 | yes |
| AN6205 | ChrI_A_nidulans_FGSC_A4:917517-919778 | WT_5hasex | WT_veg | OK | 10,9505 | 11,6056  | 0,0838253 | -0,149822 | 0,880905   | 0,95479    | no  |
| AN6206 | ChrI_A_nidulans_FGSC_A4:916122-917077 | WT_5hasex | WT_veg | OK | 10,4929 | 20,1909  | 0,944289  | -1,42414  | 0,154407   | 0,386345   | no  |
| AN6207 | ChrI_A_nidulans_FGSC_A4:913842-915339 | WT_5hasex | WT_veg | OK | 74,7255 | 50,6154  | -0,562023 | 1,15445   | 0,248315   | 0,516465   | no  |
| AN6208 | ChrI_A_nidulans_FGSC_A4:909120-911101 | WT_5hasex | WT_veg | OK | 112,616 | 95,0487  | -0,244677 | 0,494341  | 0,621065   | 0,824947   | no  |
| AN6209 | ChrI_A_nidulans_FGSC_A4:906628-908779 | WT_5hasex | WT_veg | OK | 52,7287 | 86,0498  | 0,706585  | -1,36429  | 0,172477   | 0,414859   | no  |
| AN6210 | ChrI_A_nidulans_FGSC_A4:903773-905786 | WT_5hasex | WT_veg | OK | 43,3435 | 41,9656  | -0,046607 | 0,0937845 | 0,92528    | 0,971697   | no  |
| AN6214 | ChrI_A_nidulans_FGSC_A4:891632-893435 | WT_5hasex | WT_veg | OK | 29,3571 | 41,9707  | 0,515673  | -1,03281  | 0,301691   | 0,577485   | no  |
| AN6215 | ChrI_A_nidulans_FGSC_A4:890247-891207 | WT_5hasex | WT_veg | OK | 24,1223 | 40,6112  | 0,751509  | -1,35798  | 0,17447    | 0,418213   | no  |
| AN6216 | ChrI_A_nidulans_FGSC_A4:888351-889776 | WT_5hasex | WT_veg | OK | 45,8036 | 55,5114  | 0,277323  | -0,559437 | 0,575864   | 0,798629   | no  |
| AN6217 | ChrI_A_nidulans_FGSC_A4:884928-887161 | WT_5hasex | WT_veg | OK | 38,1973 | 80,2101  | 1,07031   | -2,22398  | 0,0261497  | 0,109257   | no  |
| AN6218 | ChrI_A_nidulans_FGSC_A4:882583-884719 | WT_5hasex | WT_veg | OK | 21,172  | 29,7799  | 0,492179  | -0,964317 | 0,334887   | 0,611136   | no  |
| AN6220 | ChrI_A_nidulans_FGSC_A4:868158-870159 | WT_5hasex | WT_veg | OK | 24,66   | 36,457   | 0,564024  | -1,07956  | 0,28034    | 0,553872   | no  |
| AN6223 | ChrI_A_nidulans_FGSC_A4:853098-853776 | WT_5hasex | WT_veg | OK | 19,0199 | 24,7289  | 0,378689  | -0,599706 | 0,548702   | 0,781412   | no  |
| AN6224 | ChrI_A_nidulans_FGSC_A4:851117-851814 | WT_5hasex | WT_veg | OK | 39,0486 | 99,0103  | 1,34231   | -2,45829  | 0,0139601  | 0,0676537  | no  |
| AN6225 | ChrI_A_nidulans_FGSC_A4:850238-850877 | WT_5hasex | WT_veg | OK | 154,477 | 525,282  | 1,7657    | -3,62687  | 0,00028687 | 0,00271644 | yes |
| AN6227 | ChrI_A_nidulans_FGSC_A4:843381-844901 | WT_5hasex | WT_veg | OK | 82,3081 | 311,377  | 1,91956   | -3,80241  | 0,00014329 | 0,00149549 | yes |
| AN6228 | ChrI_A_nidulans_FGSC_A4:838121-843228 | WT_5hasex | WT_veg | OK | 20,229  | 80,9103  | 1,99989   | -4,20323  | 2,6313E-05 | 0,00034062 | yes |
| AN6233 | ChrI_A_nidulans_FGSC_A4:811499-812467 | WT_5hasex | WT_veg | OK | 18,0618 | 58,2247  | 1,68869   | -2,94885  | 0,00318955 | 0,0205684  | yes |
| AN6234 | ChrI_A_nidulans_FGSC_A4:805517-806915 | WT_5hasex | WT_veg | OK | 16,8614 | 6,39261  | -1,39924  | 2,34106   | 0,019229   | 0,0863329  | no  |
| AN6235 | ChrI_A_nidulans_FGSC_A4:804516-805330 | WT_5hasex | WT_veg | OK | 24,1958 | 5,31243  | -2,18731  | 3,12391   | 0,00178465 | 0,0127031  | yes |
| AN6236 | ChrI_A_nidulans_FGSC_A4:797657-804024 | WT_5hasex | WT_veg | OK | 12,9608 | 2,96456  | -2,12826  | 4,25653   | 2,0762E-05 | 0,00027551 | yes |
| AN6237 | ChrI_A_nidulans_FGSC_A4:793305-797305 | WT_5hasex | WT_veg | OK | 14,6703 | 3,41795  | -2,1017   | 4,03577   | 5,4424E-05 | 0,00064494 | yes |
| AN6238 | ChrI_A_nidulans_FGSC_A4:790650-792562 | WT_5hasex | WT_veg | OK | 3,32269 | 0,939358 | -1,8226   | 1,79172   | 0,0731782  | 0,232673   | no  |
| AN6239 | ChrI_A_nidulans_FGSC_A4:789395-790487 | WT_5hasex | WT_veg | OK | 22,1827 | 12,0453  | -0,880968 | 1,54054   | 0,12343    | 0,33351    | no  |
| AN6240 | ChrI_A_nidulans_FGSC_A4:787248-788354 | WT_5hasex | WT_veg | OK | 22,3705 | 50,125   | 1,16394   | -2,1152   | 0,0344131  | 0,135009   | no  |
| AN6241 | ChrI_A_nidulans_FGSC_A4:784741-787015 | WT_5hasex | WT_veg | OK | 112,05  | 452,268  | 2,01304   | -4,00242  | 6,2697E-05 | 0,00073026 | yes |
| AN6242 | ChrI_A_nidulans_FGSC_A4:783087-784274 | WT_5hasex | WT_veg | OK | 4,18554 | 2,93616  | -0,511485 | 0,462793  | 0,643513   | 0,837954   | no  |
| AN6244 | ChrI_A_nidulans_FGSC_A4:771911-773315 | WT_5hasex | WT_veg | OK | 29,9592 | 53,916   | 0,847717  | -1,62676  | 0,103788   | 0,297392   | no  |
| AN6245 | ChrI_A_nidulans_FGSC_A4:770658-771525 | WT_5hasex | WT_veg | OK | 50,0078 | 227,908  | 2,18823   | -4,30085  | 1,7014E-05 | 0,00023193 | yes |
| AN6247 | ChrI_A_nidulans_FGSC_A4:765595-767860 | WT_5hasex | WT_veg | OK | 39,1965 | 67,5471  | 0,785168  | -1,61812  | 0,105636   | 0,301025   | no  |
| AN6248 | ChrI_A_nidulans_FGSC_A4:762501-763422 | WT_5hasex | WT_veg | OK | 158,043 | 372,118  | 1,23544   | -2,43387  | 0,0149383  | 0,0713058  | no  |
| AN6250 | ChrI_A_nidulans_FGSC_A4:756139-758659 | WT_5hasex | WT_veg | OK | 39,807  | 119,675  | 1,58803   | -3,28531  | 0,00101868 | 0,00797924 | yes |
| AN6251 | ChrI_A_nidulans_FGSC_A4:752191-753517 | WT_5hasex | WT_veg | OK | 68,495  | 239,977  | 1,80882   | -3,68076  | 0,00023254 | 0,00226753 | yes |
| AN6252 | ChrI_A_nidulans_FGSC_A4:750359-751927 | WT_5hasex | WT_veg | OK | 43,1353 | 114,14   | 1,40386   | -2,876    | 0,0040275  | 0,0249114  | yes |
| AN6255 | ChrI_A_nidulans_FGSC_A4:745275-746204 | WT_5hasex | WT_veg | OK | 1605,11 | 1459,16  | -0,137533 | 0,241875  | 0,808877   | 0,923371   | no  |
| AN6256 | ChrI_A_nidulans_FGSC_A4:743679-744218 | WT_5hasex | WT_veg | OK | 42,788  | 87,5604  | 1,03307   | -1,84195  | 0,065482   | 0,214945   | no  |
| AN6257 | ChrI_A_nidulans_FGSC_A4:738812-743488 | WT_5hasex | WT_veg | OK | 38,545  | 43,8617  | 0,18642   | -0,378183 | 0,705295   | 0,87246    | no  |
| AN6258 | ChrI_A_nidulans_FGSC_A4:737135-738359 | WT_5hasex | WT_veg | OK | 16,0083 | 18,1707  | 0,182787  | -0,316643 | 0,751515   | 0,896426   | no  |
| AN6259 | ChrI_A_nidulans_FGSC_A4:734959-735674 | WT_5hasex | WT_veg | OK | 6,59864 | 10,8293  | 0,714705  | -0,920953 | 0,357075   | 0,632257   | no  |
| AN6260 | ChrI_A_nidulans_FGSC_A4:731519-733209 | WT_5hasex | WT_veg | OK | 50,2639 | 77,1892  | 0,618875  | -1,27063  | 0,203861   | 0,459926   | no  |
| AN6261 | ChrI_A_nidulans_FGSC_A4:723525-730500 | WT_5hasex | WT_veg | OK | 4,51352 | 8,47755  | 0,909394  | -1,74898  | 0,0802939  | 0,248291   | no  |
| AN6262 | ChrI_A_nidulans_FGSC_A4:721301-722877 | WT_5hasex | WT_veg | OK | 54,7488 | 59,473   | 0,119407  | -0,231001 | 0,817314   | 0,926851   | no  |
| AN6263 | ChrI_A_nidulans_FGSC_A4:717860-720928 | WT_5hasex | WT_veg | OK | 32,6982 | 43,0558  | 0,396996  | -0,808633 | 0,418726   | 0,687086   | no  |
| AN6264 | ChrI_A_nidulans_FGSC_A4:713218-714617 | WT_5hasex | WT_veg | OK | 70,9601 | 116,102  | 0,710308  | -1,4639   | 0,14322    | 0,368019   | no  |
| AN6265 | ChrI_A_nidulans_FGSC_A4:710385-712407 | WT_5hasex | WT_veg | OK | 11,7466 | 111,061  | 3,24103   | -5,88251  | 4,0408E-09 | 1,2677E-07 | yes |
| AN6266 | ChrI_A_nidulans_FGSC_A4:707467-710134 | WT_5hasex | WT_veg | OK | 12,9043 | 75,3984  | 2,54668   | -4,84256  | 1,2818E-06 | 2,2964E-05 | yes |

## Supplementary table 1

|        |                                       |           |        |        |         |         |            |           |            |            |     |
|--------|---------------------------------------|-----------|--------|--------|---------|---------|------------|-----------|------------|------------|-----|
| AN6267 | ChrI_A_nidulans_FGSC_A4:705986-707456 | WT_5hasex | WT_veg | OK     | 90,8977 | 262,133 | 1,52798    | -3,16319  | 0,0015605  | 0,0113558  | yes |
| AN6268 | ChrI_A_nidulans_FGSC_A4:702841-705753 | WT_5hasex | WT_veg | OK     | 33,6917 | 96,299  | 1,51513    | -3,17154  | 0,00151632 | 0,011099   | yes |
| AN6269 | ChrI_A_nidulans_FGSC_A4:701156-702667 | WT_5hasex | WT_veg | OK     | 82,3477 | 96,0926 | 0,222697   | -0,456486 | 0,648041   | 0,840352   | no  |
| AN6270 | ChrI_A_nidulans_FGSC_A4:699057-700900 | WT_5hasex | WT_veg | OK     | 14,2941 | 12,334  | -0,212778  | 0,38378   | 0,701141   | 0,870069   | no  |
| AN6271 | ChrI_A_nidulans_FGSC_A4:696455-698916 | WT_5hasex | WT_veg | OK     | 53,8268 | 92,213  | 0,776647   | -1,59426  | 0,110879   | 0,310942   | no  |
| AN6272 | ChrI_A_nidulans_FGSC_A4:694113-695810 | WT_5hasex | WT_veg | OK     | 37,3051 | 35,8654 | -0,0567795 | 0,110299  | 0,912172   | 0,966704   | no  |
| AN6273 | ChrI_A_nidulans_FGSC_A4:691742-692362 | WT_5hasex | WT_veg | OK     | 23,2499 | 28,2578 | 0,281422   | -0,417751 | 0,676129   | 0,855977   | no  |
| AN6274 | ChrI_A_nidulans_FGSC_A4:690221-691165 | WT_5hasex | WT_veg | OK     | 195,339 | 1172,09 | 2,58502    | -4,92103  | 8,609E-07  | 1,6083E-05 | yes |
| AN6275 | ChrI_A_nidulans_FGSC_A4:686627-689024 | WT_5hasex | WT_veg | OK     | 15,9466 | 28,6966 | 0,847631   | -1,67635  | 0,0936696  | 0,276534   | no  |
| AN6276 | ChrI_A_nidulans_FGSC_A4:684418-685556 | WT_5hasex | WT_veg | OK     | 58,4749 | 157,402 | 1,42857    | -2,84049  | 0,00450437 | 0,0273699  | yes |
| AN6277 | ChrI_A_nidulans_FGSC_A4:681406-683914 | WT_5hasex | WT_veg | OK     | 158,076 | 596,749 | 1,9165     | -3,49469  | 0,00047461 | 0,00416383 | yes |
| AN6278 | ChrI_A_nidulans_FGSC_A4:678139-679419 | WT_5hasex | WT_veg | OK     | 41,1988 | 87,0813 | 1,07976    | -2,11126  | 0,0347501  | 0,135954   | no  |
| AN6280 | ChrI_A_nidulans_FGSC_A4:670896-674240 | WT_5hasex | WT_veg | OK     | 16,5557 | 30,7698 | 0,894184   | -1,82406  | 0,068143   | 0,221287   | no  |
| AN6281 | ChrI_A_nidulans_FGSC_A4:668375-669320 | WT_5hasex | WT_veg | OK     | 10,3902 | 4,93828 | -1,07314   | 1,45523   | 0,145606   | 0,371942   | no  |
| AN6283 | ChrI_A_nidulans_FGSC_A4:659877-661222 | WT_5hasex | WT_veg | OK     | 11,2671 | 14,5682 | 0,370714   | -0,616552 | 0,53753    | 0,773986   | no  |
| AN6284 | ChrI_A_nidulans_FGSC_A4:656949-659730 | WT_5hasex | WT_veg | OK     | 21,7443 | 37,9428 | 0,803188   | -1,62923  | 0,103263   | 0,296278   | no  |
| AN6285 | ChrI_A_nidulans_FGSC_A4:654221-655670 | WT_5hasex | WT_veg | OK     | 67,0034 | 73,7333 | 0,138082   | -0,266621 | 0,789761   | 0,914325   | no  |
| AN6286 | ChrI_A_nidulans_FGSC_A4:649937-653698 | WT_5hasex | WT_veg | OK     | 109,905 | 588,799 | 2,42152    | -4,16002  | 3,1822E-05 | 0,00040426 | yes |
| AN6287 | ChrI_A_nidulans_FGSC_A4:648319-649579 | WT_5hasex | WT_veg | OK     | 331,171 | 600,109 | 0,857648   | -1,71976  | 0,0854767  | 0,259736   | no  |
| AN6289 | ChrI_A_nidulans_FGSC_A4:643848-646405 | WT_5hasex | WT_veg | OK     | 16,1891 | 17,0446 | 0,0742967  | -0,144415 | 0,885173   | 0,956347   | no  |
| AN6290 | ChrI_A_nidulans_FGSC_A4:642444-643374 | WT_5hasex | WT_veg | OK     | 17,4526 | 136,714 | 2,96964    | -5,19522  | 2,0448E-07 | 4,4461E-06 | yes |
| AN6291 | ChrI_A_nidulans_FGSC_A4:636964-640292 | WT_5hasex | WT_veg | OK     | 10,4017 | 15,199  | 0,547155   | -1,02227  | 0,306651   | 0,582848   | no  |
| AN6292 | ChrI_A_nidulans_FGSC_A4:635141-636046 | WT_5hasex | WT_veg | NOTEST | 0       | 0       | 0          | 0         | 1          | 1          | no  |
| AN6294 | ChrI_A_nidulans_FGSC_A4:630006-631260 | WT_5hasex | WT_veg | OK     | 53,3192 | 85,753  | 0,685533   | -1,35785  | 0,17451    | 0,418272   | no  |
| AN6295 | ChrI_A_nidulans_FGSC_A4:628000-629672 | WT_5hasex | WT_veg | OK     | 19,0498 | 59,2917 | 1,63805    | -3,00211  | 0,00268115 | 0,0177957  | yes |
| AN6296 | ChrI_A_nidulans_FGSC_A4:624797-626672 | WT_5hasex | WT_veg | OK     | 12,6136 | 11,2734 | -0,162062  | 0,275655  | 0,782813   | 0,911266   | no  |
| AN6297 | ChrI_A_nidulans_FGSC_A4:623305-624503 | WT_5hasex | WT_veg | OK     | 79,0665 | 71,847  | -0,138138  | 0,272892  | 0,784936   | 0,912391   | no  |
| AN6298 | ChrI_A_nidulans_FGSC_A4:621704-622589 | WT_5hasex | WT_veg | OK     | 2,46326 | 4,43148 | 0,84722    | -0,989755 | 0,322294   | 0,598471   | no  |
| AN6299 | ChrI_A_nidulans_FGSC_A4:619208-621334 | WT_5hasex | WT_veg | OK     | 23,2937 | 27,3735 | 0,232839   | -0,430057 | 0,667154   | 0,851194   | no  |
| AN6300 | ChrI_A_nidulans_FGSC_A4:616618-617929 | WT_5hasex | WT_veg | OK     | 22,946  | 30,3233 | 0,402181   | -0,733501 | 0,463253   | 0,72261    | no  |
| AN6301 | ChrI_A_nidulans_FGSC_A4:614103-615496 | WT_5hasex | WT_veg | OK     | 116,454 | 883,31  | 2,92316    | -5,98045  | 2,2252E-09 | 7,297E-08  | yes |
| AN6304 | ChrI_A_nidulans_FGSC_A4:607103-609686 | WT_5hasex | WT_veg | OK     | 15,1638 | 14,791  | -0,0359122 | 0,0705148 | 0,943784   | 0,978986   | no  |
| AN6306 | ChrI_A_nidulans_FGSC_A4:603117-603904 | WT_5hasex | WT_veg | OK     | 240,322 | 349,562 | 0,540579   | -1,07967  | 0,280287   | 0,553867   | no  |
| AN6307 | ChrI_A_nidulans_FGSC_A4:601167-602555 | WT_5hasex | WT_veg | OK     | 46,5106 | 69,6872 | 0,583336   | -1,12784  | 0,259386   | 0,529588   | no  |
| AN6308 | ChrI_A_nidulans_FGSC_A4:599782-600947 | WT_5hasex | WT_veg | OK     | 29,2606 | 77,9916 | 1,41436    | -2,7      | 0,00693401 | 0,038845   | yes |
| AN6309 | ChrI_A_nidulans_FGSC_A4:598112-599375 | WT_5hasex | WT_veg | OK     | 20,3575 | 35,344  | 0,795907   | -1,44962  | 0,147163   | 0,374602   | no  |
| AN6310 | ChrI_A_nidulans_FGSC_A4:583071-597892 | WT_5hasex | WT_veg | OK     | 2,51575 | 9,45228 | 1,90967    | -3,83856  | 0,00012376 | 0,00132296 | yes |
| AN6311 | ChrI_A_nidulans_FGSC_A4:579871-582808 | WT_5hasex | WT_veg | OK     | 28,2636 | 26,0202 | -0,119312  | 0,243321  | 0,807757   | 0,922932   | no  |
| AN6312 | ChrI_A_nidulans_FGSC_A4:578720-579508 | WT_5hasex | WT_veg | OK     | 18,1196 | 47,9053 | 1,40264    | -2,34221  | 0,0191701  | 0,0861653  | no  |
| AN6314 | ChrI_A_nidulans_FGSC_A4:573010-574118 | WT_5hasex | WT_veg | OK     | 10,9696 | 8,30071 | -0,402199  | 0,579621  | 0,56217    | 0,790194   | no  |
| AN6315 | ChrI_A_nidulans_FGSC_A4:571323-572965 | WT_5hasex | WT_veg | OK     | 5,65681 | 6,76198 | 0,257456   | -0,36229  | 0,717135   | 0,878779   | no  |
| AN6319 | ChrI_A_nidulans_FGSC_A4:551070-552780 | WT_5hasex | WT_veg | OK     | 8,86249 | 3,91668 | -1,17808   | 1,72207   | 0,0850577  | 0,258785   | no  |
| AN6322 | ChrI_A_nidulans_FGSC_A4:540148-541957 | WT_5hasex | WT_veg | OK     | 24,0412 | 70,8072 | 1,55839    | -3,04678  | 0,00231308 | 0,0157498  | yes |
| AN6325 | ChrI_A_nidulans_FGSC_A4:531701-532807 | WT_5hasex | WT_veg | OK     | 43,1532 | 65,6919 | 0,606249   | -1,18652  | 0,235416   | 0,500741   | no  |
| AN6327 | ChrI_A_nidulans_FGSC_A4:520467-522265 | WT_5hasex | WT_veg | OK     | 41,6137 | 49,6731 | 0,255405   | -0,43542  | 0,663258   | 0,849283   | no  |
| AN6328 | ChrI_A_nidulans_FGSC_A4:517447-519430 | WT_5hasex | WT_veg | OK     | 60,8773 | 53,2813 | -0,192274  | 0,382797  | 0,70187    | 0,870427   | no  |
| AN6329 | ChrI_A_nidulans_FGSC_A4:507118-516784 | WT_5hasex | WT_veg | OK     | 7,97213 | 10,1386 | 0,346821   | -0,711616 | 0,476703   | 0,732685   | no  |
| AN6330 | ChrI_A_nidulans_FGSC_A4:502838-506120 | WT_5hasex | WT_veg | OK     | 588,306 | 1155,34 | 0,973681   | -1,57955  | 0,114211   | 0,317034   | no  |
| AN6331 | ChrI_A_nidulans_FGSC_A4:499915-502407 | WT_5hasex | WT_veg | OK     | 20,2633 | 44,6977 | 1,14133    | -2,29012  | 0,0220142  | 0,0958259  | no  |
| AN6332 | ChrI_A_nidulans_FGSC_A4:498837-499714 | WT_5hasex | WT_veg | OK     | 13,071  | 19,4881 | 0,576225   | -0,899097 | 0,368601   | 0,643354   | no  |
| AN6333 | ChrI_A_nidulans_FGSC_A4:496354-498348 | WT_5hasex | WT_veg | OK     | 11,1341 | 15,4077 | 0,468663   | -0,84246  | 0,39953    | 0,67185    | no  |
| AN6334 | ChrI_A_nidulans_FGSC_A4:492293-496043 | WT_5hasex | WT_veg | OK     | 14,208  | 90,1522 | 2,66566    | -5,41438  | 6,1502E-08 | 1,5067E-06 | yes |
| AN6335 | ChrI_A_nidulans_FGSC_A4:490749-491987 | WT_5hasex | WT_veg | OK     | 22,5877 | 28,0184 | 0,310839   | -0,575238 | 0,56513    | 0,792141   | no  |

## Supplementary table 1

|        |                                       |           |        |        |          |          |               |               |            |            |     |
|--------|---------------------------------------|-----------|--------|--------|----------|----------|---------------|---------------|------------|------------|-----|
| AN6337 | ChrI_A_nidulans_FGSC_A4:485693-486494 | WT_5hasex | WT_veg | OK     | 1441,84  | 3563,89  | 1,30554       | -2,30229      | 0,0213186  | 0,0935862  | no  |
| AN6338 | ChrI_A_nidulans_FGSC_A4:481132-483132 | WT_5hasex | WT_veg | OK     | 61,472   | 62,3174  | 0,0197055     | -0,0409301    | 0,967352   | 0,988035   | no  |
| AN6339 | ChrI_A_nidulans_FGSC_A4:477236-480187 | WT_5hasex | WT_veg | OK     | 8,77271  | 9,37661  | 0,0960446     | -0,174947     | 0,861121   | 0,946301   | no  |
| AN6341 | ChrI_A_nidulans_FGSC_A4:470723-473016 | WT_5hasex | WT_veg | OK     | 59,1592  | 61,2955  | 0,0511787     | -0,106309     | 0,915337   | 0,967612   | no  |
| AN6342 | ChrI_A_nidulans_FGSC_A4:466751-469951 | WT_5hasex | WT_veg | OK     | 14,4188  | 16,2759  | 0,174793      | -0,348421     | 0,727524   | 0,884404   | no  |
| AN6344 | ChrI_A_nidulans_FGSC_A4:458272-460079 | WT_5hasex | WT_veg | OK     | 22,2535  | 28,8352  | 0,373799      | -0,722874     | 0,469757   | 0,727968   | no  |
| AN6345 | ChrI_A_nidulans_FGSC_A4:456378-457617 | WT_5hasex | WT_veg | OK     | 34,9263  | 78,2463  | 1,16371       | -2,22338      | 0,0261902  | 0,109391   | no  |
| AN6346 | ChrI_A_nidulans_FGSC_A4:454208-456320 | WT_5hasex | WT_veg | OK     | 133,641  | 171,95   | 0,363621      | -0,618922     | 0,535968   | 0,773096   | no  |
| AN6347 | ChrI_A_nidulans_FGSC_A4:451659-453735 | WT_5hasex | WT_veg | OK     | 36,9982  | 114,855  | 1,63428       | -3,30836      | 0,00093846 | 0,00745446 | yes |
| AN6348 | ChrI_A_nidulans_FGSC_A4:449578-450252 | WT_5hasex | WT_veg | OK     | 94,9734  | 402,862  | 2,08469       | -4,16235      | 3,1499E-05 | 0,00040044 | yes |
| AN6349 | ChrI_A_nidulans_FGSC_A4:443629-449186 | WT_5hasex | WT_veg | OK     | 12,5079  | 30,1837  | 1,27093       | -2,62368      | 0,00869862 | 0,0466556  | yes |
| AN6350 | ChrI_A_nidulans_FGSC_A4:442486-443386 | WT_5hasex | WT_veg | OK     | 2,34134  | 10,7687  | 2,20144       | -2,82827      | 0,00468005 | 0,0282117  | yes |
| AN6351 | ChrI_A_nidulans_FGSC_A4:439880-442269 | WT_5hasex | WT_veg | OK     | 48,6441  | 120,258  | 1,30579       | -2,70511      | 0,00682826 | 0,0383757  | yes |
| AN6353 | ChrI_A_nidulans_FGSC_A4:436272-437538 | WT_5hasex | WT_veg | OK     | 9,65875  | 28,9821  | 1,58525       | -2,5872       | 0,00967598 | 0,0507447  | no  |
| AN6354 | ChrI_A_nidulans_FGSC_A4:430984-435765 | WT_5hasex | WT_veg | OK     | 18,7092  | 89,9565  | 2,26548       | -4,75315      | 2,0028E-06 | 3,4432E-05 | yes |
| AN6356 | ChrI_A_nidulans_FGSC_A4:423232-423883 | WT_5hasex | WT_veg | NOTEST | 0        | 2,65683  | 1.79769e+308  | 1.79769e+308  | 0,036343   | 1          | no  |
| AN6358 | ChrI_A_nidulans_FGSC_A4:420311-421028 | WT_5hasex | WT_veg | NOTEST | 1,11951  | 0        | -1.79769e+308 | -1.79769e+308 | 0,0540986  | 1          | no  |
| AN6360 | ChrI_A_nidulans_FGSC_A4:413644-415634 | WT_5hasex | WT_veg | OK     | 20,9815  | 38,1373  | 0,862084      | -1,72221      | 0,0850308  | 0,258756   | no  |
| AN6361 | ChrI_A_nidulans_FGSC_A4:412819-413584 | WT_5hasex | WT_veg | OK     | 14,0008  | 18,2497  | 0,382359      | -0,596504     | 0,550838   | 0,782632   | no  |
| AN6362 | ChrI_A_nidulans_FGSC_A4:411742-412369 | WT_5hasex | WT_veg | OK     | 19,0488  | 79,2528  | 2,05676       | -3,27992      | 0,00103836 | 0,00810666 | yes |
| AN6365 | ChrI_A_nidulans_FGSC_A4:404623-409531 | WT_5hasex | WT_veg | OK     | 41,9461  | 52,494   | 0,323616      | -0,594748     | 0,552012   | 0,783323   | no  |
| AN6366 | ChrI_A_nidulans_FGSC_A4:401621-404172 | WT_5hasex | WT_veg | OK     | 224,817  | 232,259  | 0,0469818     | -0,0926743    | 0,926162   | 0,972029   | no  |
| AN6367 | ChrI_A_nidulans_FGSC_A4:401621-404172 | WT_5hasex | WT_veg | OK     | 314,386  | 1027,61  | 1,70868       | -3,32835      | 0,00087363 | 0,00700967 | yes |
| AN6368 | ChrI_A_nidulans_FGSC_A4:398977-401265 | WT_5hasex | WT_veg | OK     | 67,3789  | 199,101  | 1,56313       | -3,24042      | 0,00119353 | 0,00908799 | yes |
| AN6369 | ChrI_A_nidulans_FGSC_A4:395743-398043 | WT_5hasex | WT_veg | OK     | 8,96489  | 34,6382  | 1,95001       | -3,09151      | 0,00199139 | 0,0139267  | yes |
| AN6370 | ChrI_A_nidulans_FGSC_A4:391695-394028 | WT_5hasex | WT_veg | OK     | 45,9882  | 254,136  | 2,46626       | -5,08186      | 3,7376E-07 | 7,6327E-06 | yes |
| AN6371 | ChrI_A_nidulans_FGSC_A4:386089-387844 | WT_5hasex | WT_veg | OK     | 92,2079  | 180,062  | 0,96553       | -1,89477      | 0,0581234  | 0,197522   | no  |
| AN6372 | ChrI_A_nidulans_FGSC_A4:384188-385814 | WT_5hasex | WT_veg | OK     | 83,1856  | 51,4225  | -0,693934     | 1,30446       | 0,192078   | 0,443333   | no  |
| AN6373 | ChrI_A_nidulans_FGSC_A4:381489-382921 | WT_5hasex | WT_veg | OK     | 61,9487  | 93,0225  | 0,586506      | -1,08808      | 0,27656    | 0,549743   | no  |
| AN6374 | ChrI_A_nidulans_FGSC_A4:378989-380985 | WT_5hasex | WT_veg | OK     | 10,7457  | 92,1306  | 3,09992       | -5,51703      | 3,4477E-08 | 8,8744E-07 | yes |
| AN6376 | ChrI_A_nidulans_FGSC_A4:374608-375134 | WT_5hasex | WT_veg | OK     | 95,7363  | 207,929  | 1,11895       | -2,07216      | 0,0382501  | 0,145932   | no  |
| AN6377 | ChrI_A_nidulans_FGSC_A4:371716-373885 | WT_5hasex | WT_veg | OK     | 5,0703   | 1,4763   | -1,78009      | 2,29439       | 0,0217681  | 0,0950577  | no  |
| AN6378 | ChrI_A_nidulans_FGSC_A4:367304-368480 | WT_5hasex | WT_veg | OK     | 35,998   | 81,476   | 1,17846       | -2,11205      | 0,0346823  | 0,13579    | no  |
| AN6379 | ChrI_A_nidulans_FGSC_A4:364852-367063 | WT_5hasex | WT_veg | OK     | 19,5694  | 87,9876  | 2,1687        | -3,9158       | 9,0104E-05 | 0,0010029  | yes |
| AN6380 | ChrI_A_nidulans_FGSC_A4:363417-364368 | WT_5hasex | WT_veg | OK     | 59,7318  | 37,0478  | -0,689111     | 1,15509       | 0,248052   | 0,516323   | no  |
| AN6381 | ChrI_A_nidulans_FGSC_A4:360424-361969 | WT_5hasex | WT_veg | OK     | 1,75542  | 5,65756  | 1,68836       | -2,054        | 0,0399754  | 0,150759   | no  |
| AN6382 | ChrI_A_nidulans_FGSC_A4:350020-351913 | WT_5hasex | WT_veg | OK     | 2,7524   | 4,22595  | 0,618587      | -0,74358      | 0,45713    | 0,717997   | no  |
| AN6383 | ChrI_A_nidulans_FGSC_A4:346561-348353 | WT_5hasex | WT_veg | OK     | 8,45154  | 19,7267  | 1,22286       | -1,8711       | 0,0613314  | 0,205266   | no  |
| AN6384 | ChrI_A_nidulans_FGSC_A4:344375-345455 | WT_5hasex | WT_veg | NOTEST | 0,365844 | 3,22131  | 3,13835       | -2,40584      | 0,0161355  | 1          | no  |
| AN6385 | ChrI_A_nidulans_FGSC_A4:340853-342740 | WT_5hasex | WT_veg | NOTEST | 0,384593 | 0,487797 | 0,342948      | -0,200144     | 0,841368   | 1          | no  |
| AN6386 | ChrI_A_nidulans_FGSC_A4:338297-339555 | WT_5hasex | WT_veg | OK     | 289,246  | 302,881  | 0,0664545     | -0,119566     | 0,904827   | 0,963683   | no  |
| AN6387 | ChrI_A_nidulans_FGSC_A4:336295-338015 | WT_5hasex | WT_veg | OK     | 22,1903  | 20,7496  | -0,0968436    | 0,185316      | 0,852981   | 0,942411   | no  |
| AN6389 | ChrI_A_nidulans_FGSC_A4:330550-332356 | WT_5hasex | WT_veg | NOTEST | 0,54532  | 1,46034  | 1,42113       | -1,32159      | 0,186306   | 1          | no  |
| AN6390 | ChrI_A_nidulans_FGSC_A4:328112-329873 | WT_5hasex | WT_veg | NOTEST | 1,77969  | 3,16272  | 0,829541      | -0,998958     | 0,317815   | 1          | no  |
| AN6392 | ChrI_A_nidulans_FGSC_A4:320355-322034 | WT_5hasex | WT_veg | OK     | 2,50427  | 3,93804  | 0,653085      | -0,851646     | 0,394411   | 0,667455   | no  |
| AN6393 | ChrI_A_nidulans_FGSC_A4:319277-320064 | WT_5hasex | WT_veg | OK     | 5,31759  | 5,24988  | -0,0184889    | 0,0214091     | 0,982919   | 0,993901   | no  |
| AN6394 | ChrI_A_nidulans_FGSC_A4:317035-318710 | WT_5hasex | WT_veg | OK     | 5,92983  | 6,2559   | 0,0772258     | -0,116275     | 0,907435   | 0,964595   | no  |
| AN6396 | ChrI_A_nidulans_FGSC_A4:311441-314040 | WT_5hasex | WT_veg | NOTEST | 0,969227 | 3,40271  | 1,81178       | -2,28276      | 0,0224443  | 1          | no  |
| AN6397 | ChrI_A_nidulans_FGSC_A4:308116-309876 | WT_5hasex | WT_veg | OK     | 18,39    | 181,394  | 3,30214       | -6,32691      | 2,5012E-10 | 9,752E-09  | yes |
| AN6398 | ChrI_A_nidulans_FGSC_A4:306712-307706 | WT_5hasex | WT_veg | OK     | 36,1032  | 136,234  | 1,91588       | -3,5972       | 0,00032167 | 0,00298856 | yes |
| AN6399 | ChrI_A_nidulans_FGSC_A4:303851-305517 | WT_5hasex | WT_veg | OK     | 69,5295  | 212,202  | 1,60974       | -2,53772      | 0,0111579  | 0,0567719  | no  |
| AN6400 | ChrI_A_nidulans_FGSC_A4:299999-302568 | WT_5hasex | WT_veg | OK     | 13,1739  | 2,10873  | -2,64324      | 3,9656        | 7,3212E-05 | 0,0008351  | yes |
| AN6401 | ChrI_A_nidulans_FGSC_A4:298404-298947 | WT_5hasex | WT_veg | OK     | 929,352  | 28,7111  | -5,01655      | 6,74785       | 1,5005E-11 | 6,9523E-10 | yes |

## Supplementary table 1

|        |                                       |           |        |        |           |           |               |               |            |            |     |
|--------|---------------------------------------|-----------|--------|--------|-----------|-----------|---------------|---------------|------------|------------|-----|
| AN6403 | ChrI_A_nidulans_FGSC_A4:291659-293458 | WT_5hasex | WT_veg | NOTEST | 0,135563  | 0,995245  | 2,87609       | -1,39291      | 0,163648   | 1          | no  |
| AN6404 | ChrI_A_nidulans_FGSC_A4:288010-289336 | WT_5hasex | WT_veg | OK     | 73,9527   | 175,223   | 1,24452       | -2,06629      | 0,0388013  | 0,147509   | no  |
| AN6405 | ChrI_A_nidulans_FGSC_A4:286433-287235 | WT_5hasex | WT_veg | OK     | 24,6613   | 68,1584   | 1,46664       | -2,51976      | 0,0117433  | 0,0591024  | no  |
| AN6406 | ChrI_A_nidulans_FGSC_A4:285583-286166 | WT_5hasex | WT_veg | OK     | 2,89929   | 6,41151   | 1,14497       | -0,938564     | 0,347954   | 0,623645   | no  |
| AN6407 | ChrI_A_nidulans_FGSC_A4:280393-282197 | WT_5hasex | WT_veg | NOTEST | 0,859957  | 0,398922  | -1,10816      | 0,729222      | 0,465866   | 1          | no  |
| AN6408 | ChrI_A_nidulans_FGSC_A4:279065-279642 | WT_5hasex | WT_veg | NOTEST | 0         | 0         | 0             | 0             | 1          | 1          | no  |
| AN6409 | ChrI_A_nidulans_FGSC_A4:277144-278674 | WT_5hasex | WT_veg | OK     | 4,05899   | 2,10915   | -0,94446      | 1,1482        | 0,250886   | 0,519528   | no  |
| AN6410 | ChrI_A_nidulans_FGSC_A4:273440-276756 | WT_5hasex | WT_veg | OK     | 2,58662   | 1,33344   | -0,955918     | 1,21398       | 0,224755   | 0,486879   | no  |
| AN6411 | ChrI_A_nidulans_FGSC_A4:270041-270536 | WT_5hasex | WT_veg | OK     | 76,0531   | 213,964   | 1,49229       | -2,52156      | 0,0116837  | 0,058893   | no  |
| AN6412 | ChrI_A_nidulans_FGSC_A4:267478-269222 | WT_5hasex | WT_veg | OK     | 133,334   | 428,135   | 1,68302       | -3,11266      | 0,00185407 | 0,0131063  | yes |
| AN6413 | ChrI_A_nidulans_FGSC_A4:263852-265169 | WT_5hasex | WT_veg | OK     | 10,6954   | 12,9077   | 0,271241      | -0,379178     | 0,704555   | 0,872053   | no  |
| AN6415 | ChrI_A_nidulans_FGSC_A4:256163-257635 | WT_5hasex | WT_veg | NOTEST | 0         | 0         | 0             | 0             | 1          | 1          | no  |
| AN6416 | ChrI_A_nidulans_FGSC_A4:255194-255674 | WT_5hasex | WT_veg | NOTEST | 0         | 1,87843   | 1.79769e+308  | 1.79769e+308  | 0,123323   | 1          | no  |
| AN6417 | ChrI_A_nidulans_FGSC_A4:250828-253536 | WT_5hasex | WT_veg | OK     | 5,96616   | 5,04908   | -0,240782     | 0,350849      | 0,725702   | 0,883453   | no  |
| AN6418 | ChrI_A_nidulans_FGSC_A4:247737-249559 | WT_5hasex | WT_veg | OK     | 2,3776    | 4,87105   | 1,03473       | -1,3271       | 0,184475   | 0,432858   | no  |
| AN6419 | ChrI_A_nidulans_FGSC_A4:245715-246927 | WT_5hasex | WT_veg | NOTEST | 0,66174   | 2,25085   | 1,76613       | -1,60831      | 0,107767   | 1          | no  |
| AN6420 | ChrI_A_nidulans_FGSC_A4:242408-243275 | WT_5hasex | WT_veg | OK     | 2,04001   | 6,19875   | 1,6034        | -1,82808      | 0,0675374  | 0,219796   | no  |
| AN6421 | ChrI_A_nidulans_FGSC_A4:238311-239085 | WT_5hasex | WT_veg | NOTEST | 0,252496  | 1,17723   | 2,22106       | -1,14626      | 0,251686   | 1          | no  |
| AN6422 | ChrI_A_nidulans_FGSC_A4:236546-237561 | WT_5hasex | WT_veg | OK     | 4,66075   | 19,4548   | 2,06149       | -2,85008      | 0,00437077 | 0,0266974  | yes |
| AN6423 | ChrI_A_nidulans_FGSC_A4:235404-236123 | WT_5hasex | WT_veg | OK     | 565,56    | 780,955   | 0,46556       | -0,776733     | 0,437316   | 0,702217   | no  |
| AN6424 | ChrI_A_nidulans_FGSC_A4:234557-235316 | WT_5hasex | WT_veg | OK     | 51,9645   | 55,2528   | 0,0885195     | -0,162064     | 0,871256   | 0,950656   | no  |
| AN6426 | ChrI_A_nidulans_FGSC_A4:229008-230268 | WT_5hasex | WT_veg | OK     | 220,619   | 45,6754   | -2,27207      | 4,50491       | 6,6401E-06 | 9,9729E-05 | yes |
| AN6428 | ChrI_A_nidulans_FGSC_A4:222916-223737 | WT_5hasex | WT_veg | NOTEST | 1,25583   | 1,23338   | -0,0260336    | 0,01683       | 0,986572   | 1          | no  |
| AN6429 | ChrI_A_nidulans_FGSC_A4:221235-222640 | WT_5hasex | WT_veg | OK     | 2,29538   | 0,667982  | -1,78085      | 1,16262       | 0,244984   | 0,512584   | no  |
| AN6430 | ChrI_A_nidulans_FGSC_A4:218570-220905 | WT_5hasex | WT_veg | OK     | 5,24909   | 7,45346   | 0,505842      | -0,776684     | 0,437345   | 0,702217   | no  |
| AN6431 | ChrI_A_nidulans_FGSC_A4:206270-214310 | WT_5hasex | WT_veg | NOTEST | 0,171107  | 0,102063  | -0,745443     | 0,506798      | 0,612297   | 1          | no  |
| AN6432 | ChrI_A_nidulans_FGSC_A4:204475-205690 | WT_5hasex | WT_veg | NOTEST | 0,144943  | 0         | -1.79769e+308 | -1.79769e+308 | 0,165569   | 1          | no  |
| AN6433 | ChrI_A_nidulans_FGSC_A4:200261-201979 | WT_5hasex | WT_veg | NOTEST | 1,34385   | 2,557     | 0,928079      | -1,05079      | 0,293355   | 1          | no  |
| AN6435 | ChrI_A_nidulans_FGSC_A4:195511-196533 | WT_5hasex | WT_veg | NOTEST | 0,888688  | 0,931324  | 0,0676066     | -0,044059     | 0,964857   | 1          | no  |
| AN6436 | ChrI_A_nidulans_FGSC_A4:188037-192285 | WT_5hasex | WT_veg | NOTEST | 1,4198    | 0,335199  | -2,0826       | 2,01982       | 0,0434019  | 1          | no  |
| AN6437 | ChrI_A_nidulans_FGSC_A4:185271-186313 | WT_5hasex | WT_veg | OK     | 10,766    | 10,0421   | -0,100419     | 0,153629      | 0,877902   | 0,9534     | no  |
| AN6438 | ChrI_A_nidulans_FGSC_A4:176190-178571 | WT_5hasex | WT_veg | OK     | 16,4742   | 32,7552   | 0,991514      | -1,67343      | 0,0942431  | 0,27771    | no  |
| AN6439 | ChrI_A_nidulans_FGSC_A4:174503-175633 | WT_5hasex | WT_veg | OK     | 2,85079   | 4,53612   | 0,670098      | -0,828319     | 0,40749    | 0,677817   | no  |
| AN6440 | ChrI_A_nidulans_FGSC_A4:172566-173948 | WT_5hasex | WT_veg | OK     | 8,29027   | 27,0836   | 1,70793       | -2,71589      | 0,00660972 | 0,0374244  | yes |
| AN6441 | ChrI_A_nidulans_FGSC_A4:170813-171984 | WT_5hasex | WT_veg | OK     | 18,3168   | 179,736   | 3,29464       | -5,62976      | 1,8046E-08 | 4,9407E-07 | yes |
| AN6443 | ChrI_A_nidulans_FGSC_A4:159081-163453 | WT_5hasex | WT_veg | OK     | 23,0562   | 44,48     | 0,948         | -1,96095      | 0,0498845  | 0,177296   | no  |
| AN6444 | ChrI_A_nidulans_FGSC_A4:155232-158463 | WT_5hasex | WT_veg | NOTEST | 0,215656  | 0,195057  | -0,144842     | 0,0872848     | 0,930445   | 1          | no  |
| AN6445 | ChrI_A_nidulans_FGSC_A4:152598-154597 | WT_5hasex | WT_veg | NOTEST | 0,75717   | 0,438549  | -0,78788      | 0,536881      | 0,59135    | 1          | no  |
| AN6446 | ChrI_A_nidulans_FGSC_A4:150481-151771 | WT_5hasex | WT_veg | NOTEST | 0,221048  | 0         | -1.79769e+308 | -1.79769e+308 | 0,224063   | 1          | no  |
| AN6447 | ChrI_A_nidulans_FGSC_A4:147469-149793 | WT_5hasex | WT_veg | NOTEST | 0,139359  | 1,64829   | 3,56409       | -1,67967      | 0,093021   | 1          | no  |
| AN6448 | ChrI_A_nidulans_FGSC_A4:139084-146905 | WT_5hasex | WT_veg | NOTEST | 0,0523149 | 0,0801571 | 0,61561       | -0,341791     | 0,732508   | 1          | no  |
| AN6450 | ChrI_A_nidulans_FGSC_A4:131393-132282 | WT_5hasex | WT_veg | OK     | 8,85246   | 11,9569   | 0,433692      | -0,598774     | 0,549323   | 0,781645   | no  |
| AN6451 | ChrI_A_nidulans_FGSC_A4:128976-130849 | WT_5hasex | WT_veg | NOTEST | 0,879658  | 1,51916   | 0,788257      | -0,78879      | 0,430235   | 1          | no  |
| AN6452 | ChrI_A_nidulans_FGSC_A4:126549-128898 | WT_5hasex | WT_veg | NOTEST | 0,0906235 | 0         | -1.79769e+308 | -1.79769e+308 | 0,23809    | 1          | no  |
| AN6453 | ChrI_A_nidulans_FGSC_A4:124952-126190 | WT_5hasex | WT_veg | NOTEST | 0         | 0         | 0             | 0             | 1          | 1          | no  |
| AN6454 | ChrI_A_nidulans_FGSC_A4:121124-124524 | WT_5hasex | WT_veg | NOTEST | 0         | 0         | 0             | 0             | 1          | 1          | no  |
| AN6455 | ChrI_A_nidulans_FGSC_A4:118208-119247 | WT_5hasex | WT_veg | OK     | 5,58561   | 22,1939   | 1,99038       | -2,41771      | 0,0156187  | 0,0737343  | no  |
| AN6456 | ChrI_A_nidulans_FGSC_A4:116345-117392 | WT_5hasex | WT_veg | NOTEST | 0,910267  | 0         | -1.79769e+308 | -1.79769e+308 | 0,0399057  | 1          | no  |
| AN6457 | ChrI_A_nidulans_FGSC_A4:113731-114706 | WT_5hasex | WT_veg | NOTEST | 0         | 0         | 0             | 0             | 1          | 1          | no  |
| AN6458 | ChrI_A_nidulans_FGSC_A4:110528-111748 | WT_5hasex | WT_veg | NOTEST | 0         | 0         | 0             | 0             | 1          | 1          | no  |
| AN6459 | ChrI_A_nidulans_FGSC_A4:108056-110040 | WT_5hasex | WT_veg | NOTEST | 0         | 0         | 0             | 0             | 1          | 1          | no  |
| AN6460 | ChrI_A_nidulans_FGSC_A4:103139-104328 | WT_5hasex | WT_veg | OK     | 154,156   | 306,666   | 0,992272      | -1,99188      | 0,0463843  | 0,168396   | no  |
| AN6461 | ChrI_A_nidulans_FGSC_A4:100207-102090 | WT_5hasex | WT_veg | NOTEST | 1,404     | 0,505403  | -1,47404      | 1,02097       | 0,307269   | 1          | no  |

# Supplementary table 1

|        |                                         |           |        |        |          |          |               |               |            |            |     |
|--------|-----------------------------------------|-----------|--------|--------|----------|----------|---------------|---------------|------------|------------|-----|
| AN6462 | ChrI_A_nidulans_FGSC_A4:98010-99486     | WT_5hasex | WT_veg | NOTEST | 0,156611 | 0,640622 | 2,03229       | -0,854907     | 0,392602   | 1          | no  |
| AN6463 | ChrI_A_nidulans_FGSC_A4:90323-91145     | WT_5hasex | WT_veg | NOTEST | 1,31467  | 1,02754  | -0,355508     | 0,23795       | 0,811919   | 1          | no  |
| AN6464 | ChrI_A_nidulans_FGSC_A4:80851-83958     | WT_5hasex | WT_veg | NOTEST | 0        | 0        | 0             | 0             | 1          | 1          | no  |
| AN6465 | ChrI_A_nidulans_FGSC_A4:78099-80382     | WT_5hasex | WT_veg | NOTEST | 0        | 0,228981 | 1.79769e+308  | 1.79769e+308  | 0,309884   | 1          | no  |
| AN6468 | ChrI_A_nidulans_FGSC_A4:61077-64006     | WT_5hasex | WT_veg | OK     | 4,28662  | 7,22699  | 0,753557      | -1,09559      | 0,273257   | 0,545972   | no  |
| AN6469 | ChrI_A_nidulans_FGSC_A4:57878-59853     | WT_5hasex | WT_veg | OK     | 4,74523  | 1,94065  | -1,28994      | 1,44965       | 0,147157   | 0,374602   | no  |
| AN6470 | ChrI_A_nidulans_FGSC_A4:51785-52573     | WT_5hasex | WT_veg | OK     | 33,694   | 2,59798  | -3,69703      | 4,10397       | 4,0612E-05 | 0,00049969 | yes |
| AN6471 | ChrI_A_nidulans_FGSC_A4:49803-50534     | WT_5hasex | WT_veg | OK     | 33,5418  | 52,2361  | 0,63909       | -1,1212       | 0,262203   | 0,532915   | no  |
| AN6473 | ChrI_A_nidulans_FGSC_A4:41136-44634     | WT_5hasex | WT_veg | OK     | 1,22586  | 4,11812  | 1,74819       | -2,26545      | 0,0234853  | 0,100619   | no  |
| AN6476 | ChrI_A_nidulans_FGSC_A4:30913-31619     | WT_5hasex | WT_veg | OK     | 3,13052  | 0        | -1.79769e+308 | -1.79769e+308 | 0,0302385  | 0,122039   | no  |
| AN6477 | ChrI_A_nidulans_FGSC_A4:24752-26659     | WT_5hasex | WT_veg | OK     | 110,534  | 4,10222  | -4,75194      | 7,40241       | 1,3367E-13 | 8,3488E-12 | yes |
| AN6478 | ChrI_A_nidulans_FGSC_A4:22400-23183     | WT_5hasex | WT_veg | OK     | 1,67387  | 18,3353  | 3,45337       | -3,39372      | 0,0006895  | 0,00572054 | yes |
| AN6479 | ChrI_A_nidulans_FGSC_A4:20195-22128     | WT_5hasex | WT_veg | NOTEST | 1,7138   | 3,65186  | 1,09144       | -1,24465      | 0,213259   | 1          | no  |
| AN6480 | ChrI_A_nidulans_FGSC_A4:18984-20040     | WT_5hasex | WT_veg | OK     | 2,62852  | 8,4525   | 1,68513       | -1,93307      | 0,0532282  | 0,185469   | no  |
| AN6481 | ChrI_A_nidulans_FGSC_A4:16397-18782     | WT_5hasex | WT_veg | OK     | 2,5895   | 6,71543  | 1,37481       | -1,71803      | 0,0857909  | 0,260525   | no  |
| AN6482 | ChrI_A_nidulans_FGSC_A4:15220-16233     | WT_5hasex | WT_veg | NOTEST | 0,448628 | 1,84274  | 2,03826       | -1,41001      | 0,158537   | 1          | no  |
| AN6484 | ChrI_A_nidulans_FGSC_A4:8571-10058      | WT_5hasex | WT_veg | NOTEST | 0        | 0        | 0             | 0             | 1          | 1          | no  |
| AN6487 | ChrI_A_nidulans_FGSC_A4:2271771-2273479 | WT_5hasex | WT_veg | OK     | 186,921  | 167,249  | -0,160435     | 0,313821      | 0,753657   | 0,897673   | no  |
| AN6488 | ChrI_A_nidulans_FGSC_A4:2274285-2275804 | WT_5hasex | WT_veg | OK     | 60,3157  | 150,732  | 1,32138       | -2,71762      | 0,00657539 | 0,0372703  | yes |
| AN6489 | ChrI_A_nidulans_FGSC_A4:2276158-2277277 | WT_5hasex | WT_veg | OK     | 103,574  | 263,945  | 1,34957       | -2,79139      | 0,00524825 | 0,0309253  | yes |
| AN6490 | ChrI_A_nidulans_FGSC_A4:2277390-2280158 | WT_5hasex | WT_veg | OK     | 112,498  | 306,462  | 1,4458        | -2,88472      | 0,00391757 | 0,0243724  | yes |
| AN6491 | ChrI_A_nidulans_FGSC_A4:2277390-2280158 | WT_5hasex | WT_veg | OK     | 59,5102  | 657,127  | 3,46496       | -6,87679      | 6,1216E-12 | 3,0464E-10 | yes |
| AN6493 | ChrI_A_nidulans_FGSC_A4:2280414-2284598 | WT_5hasex | WT_veg | OK     | 55,2984  | 74,0557  | 0,421371      | -0,859192     | 0,390234   | 0,663543   | no  |
| AN6494 | ChrI_A_nidulans_FGSC_A4:2285838-2288561 | WT_5hasex | WT_veg | OK     | 3,15858  | 2,69178  | -0,230716     | 0,317747      | 0,750677   | 0,896038   | no  |
| AN6495 | ChrI_A_nidulans_FGSC_A4:2289312-2290151 | WT_5hasex | WT_veg | OK     | 22,9505  | 78,9669  | 1,78272       | -3,10971      | 0,0018727  | 0,0132041  | yes |
| AN6496 | ChrI_A_nidulans_FGSC_A4:2290186-2293082 | WT_5hasex | WT_veg | OK     | 23,5872  | 50,2714  | 1,09173       | -2,17889      | 0,0293399  | 0,119267   | no  |
| AN6497 | ChrI_A_nidulans_FGSC_A4:2293535-2294109 | WT_5hasex | WT_veg | OK     | 69,0545  | 409,12   | 2,56672       | -4,7963       | 1,6163E-06 | 2,8373E-05 | yes |
| AN6500 | ChrI_A_nidulans_FGSC_A4:2300285-2301348 | WT_5hasex | WT_veg | OK     | 1766,18  | 2062,56  | 0,223802      | -0,36486      | 0,715216   | 0,877679   | no  |
| AN6501 | ChrI_A_nidulans_FGSC_A4:2302666-2303830 | WT_5hasex | WT_veg | OK     | 42,614   | 79,7103  | 0,903441      | -1,80383      | 0,0712582  | 0,228361   | no  |
| AN6503 | ChrI_A_nidulans_FGSC_A4:2306567-2308118 | WT_5hasex | WT_veg | OK     | 100,614  | 145,587  | 0,533046      | -1,02781      | 0,304041   | 0,580076   | no  |
| AN6504 | ChrI_A_nidulans_FGSC_A4:2312499-2312817 | WT_5hasex | WT_veg | OK     | 2,53906  | 13,6077  | 2,42205       | -2,20473      | 0,0274731  | 0,113331   | no  |
| AN6506 | ChrI_A_nidulans_FGSC_A4:2316941-2318172 | WT_5hasex | WT_veg | OK     | 163,869  | 392,105  | 1,2587        | -2,59577      | 0,0094378  | 0,0497643  | yes |
| AN6507 | ChrI_A_nidulans_FGSC_A4:2318732-2321809 | WT_5hasex | WT_veg | OK     | 46,7376  | 85,9435  | 0,878803      | -1,82681      | 0,0677277  | 0,220234   | no  |
| AN6508 | ChrI_A_nidulans_FGSC_A4:2322368-2324513 | WT_5hasex | WT_veg | OK     | 136,675  | 229,393  | 0,747077      | -1,49892      | 0,133893   | 0,352382   | no  |
| AN6509 | ChrI_A_nidulans_FGSC_A4:2330468-2331302 | WT_5hasex | WT_veg | OK     | 8,71277  | 12,614   | 0,533826      | -0,620422     | 0,53498    | 0,772628   | no  |
| AN6510 | ChrI_A_nidulans_FGSC_A4:2331317-2333269 | WT_5hasex | WT_veg | OK     | 153,247  | 490,701  | 1,67898       | -3,34285      | 0,00082924 | 0,00669547 | yes |
| AN6512 | ChrI_A_nidulans_FGSC_A4:2339888-2340822 | WT_5hasex | WT_veg | OK     | 65,0738  | 147,331  | 1,17891       | -2,39714      | 0,0165238  | 0,0770654  | no  |
| AN6513 | ChrI_A_nidulans_FGSC_A4:2341098-2342545 | WT_5hasex | WT_veg | OK     | 14,3551  | 42,2113  | 1,55607       | -2,78725      | 0,00531573 | 0,0312457  | yes |
| AN6514 | ChrI_A_nidulans_FGSC_A4:2342937-2344524 | WT_5hasex | WT_veg | OK     | 17,4042  | 46,2299  | 1,40939       | -2,50014      | 0,0124144  | 0,0617854  | no  |
| AN6515 | ChrI_A_nidulans_FGSC_A4:2344862-2347026 | WT_5hasex | WT_veg | OK     | 61,9758  | 132,011  | 1,09088       | -2,25498      | 0,0241344  | 0,102622   | no  |
| AN6516 | ChrI_A_nidulans_FGSC_A4:2344862-2347026 | WT_5hasex | WT_veg | OK     | 16,0715  | 33,2414  | 1,04847       | -1,66943      | 0,0950314  | 0,27928    | no  |
| AN6517 | ChrI_A_nidulans_FGSC_A4:2347240-2348507 | WT_5hasex | WT_veg | OK     | 44,6227  | 65,6694  | 0,557444      | -1,11948      | 0,262938   | 0,533759   | no  |
| AN6518 | ChrI_A_nidulans_FGSC_A4:2348839-2349934 | WT_5hasex | WT_veg | OK     | 144,224  | 108,883  | -0,405525     | 0,621023      | 0,534585   | 0,772628   | no  |
| AN6520 | ChrI_A_nidulans_FGSC_A4:2355309-2356519 | WT_5hasex | WT_veg | OK     | 25,6908  | 30,0827  | 0,227681      | -0,422088     | 0,672961   | 0,854069   | no  |
| AN6522 | ChrI_A_nidulans_FGSC_A4:2360631-2362546 | WT_5hasex | WT_veg | OK     | 21,7199  | 22,7922  | 0,0695214     | -0,137228     | 0,890851   | 0,95862    | no  |
| AN6524 | ChrI_A_nidulans_FGSC_A4:2369260-2369772 | WT_5hasex | WT_veg | OK     | 208,704  | 311,246  | 0,576602      | -1,17676      | 0,239292   | 0,505091   | no  |
| AN6526 | ChrI_A_nidulans_FGSC_A4:2373213-2376238 | WT_5hasex | WT_veg | OK     | 28,8318  | 26,2294  | -0,136481     | 0,281709      | 0,778167   | 0,909238   | no  |
| AN6527 | ChrI_A_nidulans_FGSC_A4:2376731-2377716 | WT_5hasex | WT_veg | OK     | 42,8092  | 86,6259  | 1,01688       | -1,98385      | 0,0472721  | 0,170791   | no  |
| AN6528 | ChrI_A_nidulans_FGSC_A4:2377944-2379744 | WT_5hasex | WT_veg | OK     | 18,1093  | 17,7828  | -0,0262505    | 0,0485105     | 0,961309   | 0,985743   | no  |
| AN6529 | ChrI_A_nidulans_FGSC_A4:2381906-2384115 | WT_5hasex | WT_veg | OK     | 5,4549   | 19,4965  | 1,83759       | -2,93033      | 0,00338607 | 0,0216466  | yes |
| AN6530 | ChrI_A_nidulans_FGSC_A4:2385150-2387049 | WT_5hasex | WT_veg | OK     | 62,6451  | 112,416  | 0,843579      | -1,75876      | 0,0786176  | 0,244799   | no  |
| AN6532 | ChrI_A_nidulans_FGSC_A4:2389577-2390756 | WT_5hasex | WT_veg | OK     | 19,1074  | 23,4196  | 0,293584      | -0,502755     | 0,615136   | 0,82197    | no  |
| AN6534 | ChrI_A_nidulans_FGSC_A4:2400718-2402653 | WT_5hasex | WT_veg | OK     | 54,0207  | 105,581  | 0,966765      | -2,01377      | 0,044034   | 0,161826   | no  |

## Supplementary table 1

|        |                                         |           |        |    |         |         |             |            |            |            |     |
|--------|-----------------------------------------|-----------|--------|----|---------|---------|-------------|------------|------------|------------|-----|
| AN6535 | ChrI_A_nidulans_FGSC_A4:2403114-2403821 | WT_5hasex | WT_veg | OK | 69,7433 | 126,373 | 0,857564    | -1,69745   | 0,089612   | 0,26838    | no  |
| AN6537 | ChrI_A_nidulans_FGSC_A4:2405111-2405919 | WT_5hasex | WT_veg | OK | 44,964  | 256,243 | 2,51067     | -4,78276   | 1,7291E-06 | 3,0122E-05 | yes |
| AN6538 | ChrI_A_nidulans_FGSC_A4:2407856-2412034 | WT_5hasex | WT_veg | OK | 36,4442 | 65,7187 | 0,850613    | -1,76459   | 0,0776332  | 0,24758    | no  |
| AN6540 | ChrI_A_nidulans_FGSC_A4:2412701-2415128 | WT_5hasex | WT_veg | OK | 11,8786 | 49,0515 | 2,04594     | -3,81822   | 0,00013442 | 0,00142038 | yes |
| AN6541 | ChrI_A_nidulans_FGSC_A4:2415382-2418260 | WT_5hasex | WT_veg | OK | 20,7136 | 42,2935 | 1,02986     | -2,0028    | 0,0451992  | 0,165089   | no  |
| AN6543 | ChrI_A_nidulans_FGSC_A4:2422438-2423677 | WT_5hasex | WT_veg | OK | 193,835 | 445,529 | 1,20069     | -2,29948   | 0,0214778  | 0,0940745  | no  |
| AN6544 | ChrI_A_nidulans_FGSC_A4:2423794-2424529 | WT_5hasex | WT_veg | OK | 97,6787 | 166,561 | 0,769931    | -1,52871   | 0,126337   | 0,33874    | no  |
| AN6545 | ChrI_A_nidulans_FGSC_A4:2424775-2426354 | WT_5hasex | WT_veg | OK | 9,97091 | 12,4956 | 0,325618    | -0,546827  | 0,584498   | 0,803886   | no  |
| AN6546 | ChrI_A_nidulans_FGSC_A4:2426576-2427594 | WT_5hasex | WT_veg | OK | 126,571 | 124,709 | -0,0213884  | 0,0435028  | 0,965301   | 0,987321   | no  |
| AN6547 | ChrI_A_nidulans_FGSC_A4:2427753-2428878 | WT_5hasex | WT_veg | OK | 324,829 | 462,379 | 0,509397    | -1,01502   | 0,310095   | 0,586523   | no  |
| AN6548 | ChrI_A_nidulans_FGSC_A4:2428984-2429957 | WT_5hasex | WT_veg | OK | 39,2496 | 104,696 | 1,41545     | -2,6172    | 0,0088655  | 0,0473954  | yes |
| AN6549 | ChrI_A_nidulans_FGSC_A4:2430228-2431333 | WT_5hasex | WT_veg | OK | 38,3468 | 78,2193 | 1,02842     | -2,00867   | 0,0445725  | 0,163448   | no  |
| AN6551 | ChrI_A_nidulans_FGSC_A4:2434771-2440388 | WT_5hasex | WT_veg | OK | 19,8116 | 37,4116 | 0,917142    | -1,84605   | 0,0648852  | 0,213682   | no  |
| AN6552 | ChrI_A_nidulans_FGSC_A4:2442843-2444289 | WT_5hasex | WT_veg | OK | 14,2636 | 11,7479 | -0,279933   | 0,486522   | 0,626597   | 0,828286   | no  |
| AN6553 | ChrI_A_nidulans_FGSC_A4:2444317-2447599 | WT_5hasex | WT_veg | OK | 18,2818 | 25,8206 | 0,498115    | -0,997811  | 0,318371   | 0,594367   | no  |
| AN6554 | ChrI_A_nidulans_FGSC_A4:2448438-2449066 | WT_5hasex | WT_veg | OK | 14,1505 | 20,1742 | 0,511662    | -0,763501  | 0,445165   | 0,708548   | no  |
| AN6555 | ChrI_A_nidulans_FGSC_A4:2450022-2451653 | WT_5hasex | WT_veg | OK | 22,4367 | 22,3414 | -0,00614123 | 0,0112125  | 0,991054   | 0,99676    | no  |
| AN6556 | ChrI_A_nidulans_FGSC_A4:2451840-2452516 | WT_5hasex | WT_veg | OK | 23,1396 | 109,233 | 2,23897     | -3,63965   | 0,00027301 | 0,0026016  | yes |
| AN6557 | ChrI_A_nidulans_FGSC_A4:2452789-2453811 | WT_5hasex | WT_veg | OK | 206,309 | 283,772 | 0,459928    | -0,952276  | 0,340957   | 0,616591   | no  |
| AN6558 | ChrI_A_nidulans_FGSC_A4:2454137-2454829 | WT_5hasex | WT_veg | OK | 22,6043 | 111,465 | 2,30193     | -3,60509   | 0,00031205 | 0,00291685 | yes |
| AN6559 | ChrI_A_nidulans_FGSC_A4:2455247-2456912 | WT_5hasex | WT_veg | OK | 14,0709 | 23,236  | 0,723648    | -1,32198   | 0,186175   | 0,435255   | no  |
| AN6560 | ChrI_A_nidulans_FGSC_A4:2459786-2461457 | WT_5hasex | WT_veg | OK | 59,5349 | 113,245 | 0,927644    | -1,8768    | 0,0605456  | 0,203627   | no  |
| AN6561 | ChrI_A_nidulans_FGSC_A4:2462125-2463264 | WT_5hasex | WT_veg | OK | 15,0495 | 75,301  | 2,32295     | -3,97006   | 7,1853E-05 | 0,00082211 | yes |
| AN6562 | ChrI_A_nidulans_FGSC_A4:2463800-2465660 | WT_5hasex | WT_veg | OK | 6,53769 | 27,2331 | 2,05851     | -3,403     | 0,00066649 | 0,00555344 | yes |
| AN6563 | ChrI_A_nidulans_FGSC_A4:2466372-2468088 | WT_5hasex | WT_veg | OK | 604,816 | 1301,38 | 1,10547     | -1,98156   | 0,047528   | 0,171485   | no  |
| AN6564 | ChrI_A_nidulans_FGSC_A4:2468290-2469401 | WT_5hasex | WT_veg | OK | 84,6383 | 157,801 | 0,898722    | -1,84601   | 0,0648913  | 0,213689   | no  |
| AN6565 | ChrI_A_nidulans_FGSC_A4:2473148-2474359 | WT_5hasex | WT_veg | OK | 52,6491 | 43,3376 | -0,28079    | 0,530096   | 0,596046   | 0,810704   | no  |
| AN6566 | ChrI_A_nidulans_FGSC_A4:2475863-2476975 | WT_5hasex | WT_veg | OK | 130,528 | 192,423 | 0,559922    | -1,13905   | 0,254681   | 0,523927   | no  |
| AN6567 | ChrI_A_nidulans_FGSC_A4:2477417-2479369 | WT_5hasex | WT_veg | OK | 29,501  | 64,0785 | 1,11907     | -2,27325   | 0,0230111  | 0,0990331  | no  |
| AN6568 | ChrI_A_nidulans_FGSC_A4:2479879-2481585 | WT_5hasex | WT_veg | OK | 17,3685 | 21,5669 | 0,312343    | -0,569245  | 0,56919    | 0,794658   | no  |
| AN6569 | ChrI_A_nidulans_FGSC_A4:2482045-2483203 | WT_5hasex | WT_veg | OK | 14,0385 | 25,2674 | 0,847888    | -1,44564   | 0,148277   | 0,375999   | no  |
| AN6570 | ChrI_A_nidulans_FGSC_A4:2483879-2485345 | WT_5hasex | WT_veg | OK | 26,8777 | 28,2739 | 0,0730619   | -0,139152  | 0,88933    | 0,958134   | no  |
| AN6571 | ChrI_A_nidulans_FGSC_A4:2487389-2489020 | WT_5hasex | WT_veg | OK | 11,184  | 46,274  | 2,04876     | -3,58092   | 0,00034238 | 0,0031493  | yes |
| AN6572 | ChrI_A_nidulans_FGSC_A4:2489120-2491632 | WT_5hasex | WT_veg | OK | 27,7021 | 33,7672 | 0,285624    | -0,548262  | 0,583512   | 0,803374   | no  |
| AN6573 | ChrI_A_nidulans_FGSC_A4:2491872-2492873 | WT_5hasex | WT_veg | OK | 20,8343 | 21,4108 | 0,0393771   | -0,0646219 | 0,948475   | 0,980963   | no  |
| AN6574 | ChrI_A_nidulans_FGSC_A4:2493385-2495920 | WT_5hasex | WT_veg | OK | 27,5326 | 87,401  | 1,66651     | -3,41552   | 0,00063661 | 0,00534612 | yes |
| AN6575 | ChrI_A_nidulans_FGSC_A4:2496091-2498141 | WT_5hasex | WT_veg | OK | 17,5953 | 36,9999 | 1,07233     | -2,10706   | 0,0351126  | 0,136862   | no  |
| AN6576 | ChrI_A_nidulans_FGSC_A4:2501190-2501908 | WT_5hasex | WT_veg | OK | 120,241 | 328,363 | 1,44936     | -2,97789   | 0,0029024  | 0,0190091  | yes |
| AN6577 | ChrI_A_nidulans_FGSC_A4:2504203-2506610 | WT_5hasex | WT_veg | OK | 14,2061 | 43,5079 | 1,61477     | -3,11841   | 0,00181829 | 0,0128812  | yes |
| AN6578 | ChrI_A_nidulans_FGSC_A4:2514437-2515868 | WT_5hasex | WT_veg | OK | 39,2244 | 62,6099 | 0,674638    | -1,32204   | 0,186155   | 0,435241   | no  |
| AN6579 | ChrI_A_nidulans_FGSC_A4:2518005-2519465 | WT_5hasex | WT_veg | OK | 10,665  | 4,49964 | -1,245      | 1,89736    | 0,057781   | 0,196639   | no  |
| AN6580 | ChrI_A_nidulans_FGSC_A4:2520417-2521766 | WT_5hasex | WT_veg | OK | 9,32476 | 20,5084 | 1,13707     | -1,80109   | 0,0716892  | 0,229322   | no  |
| AN6581 | ChrI_A_nidulans_FGSC_A4:2523954-2528508 | WT_5hasex | WT_veg | OK | 8,28635 | 22,3886 | 1,43396     | -2,82625   | 0,00470962 | 0,0283573  | yes |
| AN6582 | ChrI_A_nidulans_FGSC_A4:2528965-2531277 | WT_5hasex | WT_veg | OK | 2,2983  | 5,29535 | 1,20416     | -1,53108   | 0,12575    | 0,3377     | no  |
| AN6583 | ChrI_A_nidulans_FGSC_A4:2531405-2533758 | WT_5hasex | WT_veg | OK | 11,1467 | 23,9789 | 1,10514     | -1,99953   | 0,0455505  | 0,166025   | no  |
| AN6584 | ChrI_A_nidulans_FGSC_A4:2535503-2536015 | WT_5hasex | WT_veg | OK | 15,6831 | 12,8653 | -0,285728   | 0,393097   | 0,694248   | 0,866148   | no  |
| AN6585 | ChrI_A_nidulans_FGSC_A4:2536299-2540026 | WT_5hasex | WT_veg | OK | 4,61969 | 24,3536 | 2,39827     | -4,17569   | 2,9708E-05 | 0,00038063 | yes |
| AN6586 | ChrI_A_nidulans_FGSC_A4:2540197-2540815 | WT_5hasex | WT_veg | OK | 23,648  | 91,9342 | 1,95888     | -3,37767   | 0,00073103 | 0,00601371 | yes |
| AN6587 | ChrI_A_nidulans_FGSC_A4:2541767-2544639 | WT_5hasex | WT_veg | OK | 15,5305 | 40,0885 | 1,36809     | -2,58162   | 0,00983375 | 0,0513921  | no  |
| AN6588 | ChrI_A_nidulans_FGSC_A4:2551250-2552868 | WT_5hasex | WT_veg | OK | 353,193 | 914,443 | 1,37244     | -2,5327    | 0,0113187  | 0,0574342  | no  |
| AN6589 | ChrI_A_nidulans_FGSC_A4:2553536-2556874 | WT_5hasex | WT_veg | OK | 13,2363 | 15,7098 | 0,247161    | -0,496001  | 0,619894   | 0,824371   | no  |
| AN6590 | ChrI_A_nidulans_FGSC_A4:2557766-2562479 | WT_5hasex | WT_veg | OK | 20,9652 | 71,9259 | 1,77851     | -3,68373   | 0,00022985 | 0,00224624 | yes |
| AN6592 | ChrI_A_nidulans_FGSC_A4:2568381-2568797 | WT_5hasex | WT_veg | OK | 19,1264 | 44,8227 | 1,22866     | -1,78693   | 0,0739487  | 0,234265   | no  |

## Supplementary table 1

|        |                                         |           |        |        |          |         |           |            |            |            |     |
|--------|-----------------------------------------|-----------|--------|--------|----------|---------|-----------|------------|------------|------------|-----|
| AN6593 | ChrI_A_nidulans_FGSC_A4:2569498-2569894 | WT_5hasex | WT_veg | OK     | 89,4359  | 105,761 | 0,241889  | -0,441177  | 0,659085   | 0,8464     | no  |
| AN6594 | ChrI_A_nidulans_FGSC_A4:2570316-2571599 | WT_5hasex | WT_veg | OK     | 19,4633  | 61,8612 | 1,66828   | -3,05731   | 0,00223337 | 0,0153134  | yes |
| AN6596 | ChrI_A_nidulans_FGSC_A4:2575713-2578203 | WT_5hasex | WT_veg | OK     | 47,2671  | 56,2579 | 0,251221  | -0,506905  | 0,612222   | 0,82025    | no  |
| AN6597 | ChrI_A_nidulans_FGSC_A4:2578473-2579896 | WT_5hasex | WT_veg | OK     | 37,4153  | 143,65  | 1,94086   | -3,81025   | 0,00013882 | 0,00145668 | yes |
| AN6598 | ChrI_A_nidulans_FGSC_A4:2580338-2586754 | WT_5hasex | WT_veg | OK     | 11,8304  | 12,0264 | 0,0236996 | -0,0482327 | 0,961531   | 0,985849   | no  |
| AN6599 | ChrI_A_nidulans_FGSC_A4:2586984-2587873 | WT_5hasex | WT_veg | OK     | 25,471   | 31,332  | 0,298782  | -0,523143  | 0,600875   | 0,813741   | no  |
| AN6600 | ChrI_A_nidulans_FGSC_A4:2588055-2590384 | WT_5hasex | WT_veg | OK     | 7,33167  | 9,87972 | 0,430329  | -0,723405  | 0,469431   | 0,727694   | no  |
| AN6601 | ChrI_A_nidulans_FGSC_A4:2590989-2593061 | WT_5hasex | WT_veg | OK     | 59,9042  | 157,512 | 1,39474   | -2,91919   | 0,00350944 | 0,0223101  | yes |
| AN6602 | ChrI_A_nidulans_FGSC_A4:2593256-2596576 | WT_5hasex | WT_veg | OK     | 29,5956  | 37,5339 | 0,342812  | -0,664693  | 0,506247   | 0,753918   | no  |
| AN6603 | ChrI_A_nidulans_FGSC_A4:2593256-2596576 | WT_5hasex | WT_veg | OK     | 25,2652  | 43,0105 | 0,767537  | -1,49598   | 0,134658   | 0,353649   | no  |
| AN6604 | ChrI_A_nidulans_FGSC_A4:2597921-2599094 | WT_5hasex | WT_veg | OK     | 6,52772  | 12,9091 | 0,983736  | -1,44953   | 0,147191   | 0,37464    | no  |
| AN6606 | ChrI_A_nidulans_FGSC_A4:2604065-2606950 | WT_5hasex | WT_veg | OK     | 23,8859  | 24,6381 | 0,0447361 | -0,0915552 | 0,927051   | 0,972423   | no  |
| AN6607 | ChrI_A_nidulans_FGSC_A4:2607311-2607785 | WT_5hasex | WT_veg | OK     | 19,432   | 61,1094 | 1,65296   | -2,53932   | 0,0111069  | 0,056595   | no  |
| AN6608 | ChrI_A_nidulans_FGSC_A4:2608239-2611510 | WT_5hasex | WT_veg | OK     | 17,3248  | 35,2231 | 1,02368   | -2,0528    | 0,0400919  | 0,151013   | no  |
| AN6609 | ChrI_A_nidulans_FGSC_A4:2611670-2613533 | WT_5hasex | WT_veg | OK     | 52,558   | 37,7165 | -0,478717 | 0,978567   | 0,327794   | 0,604188   | no  |
| AN6610 | ChrI_A_nidulans_FGSC_A4:2614730-2615618 | WT_5hasex | WT_veg | OK     | 42,2963  | 24,1194 | -0,810337 | 1,46313    | 0,143432   | 0,368456   | no  |
| AN6611 | ChrI_A_nidulans_FGSC_A4:2617625-2621029 | WT_5hasex | WT_veg | OK     | 36,1821  | 53,8893 | 0,574725  | -1,18644   | 0,23545    | 0,500753   | no  |
| AN6612 | ChrI_A_nidulans_FGSC_A4:2621274-2622354 | WT_5hasex | WT_veg | OK     | 24,8371  | 185,158 | 2,89819   | -5,17938   | 2,2262E-07 | 4,7968E-06 | yes |
| AN6613 | ChrI_A_nidulans_FGSC_A4:2622744-2624042 | WT_5hasex | WT_veg | OK     | 34,8763  | 56,4527 | 0,694793  | -1,28061   | 0,20033    | 0,454958   | no  |
| AN6614 | ChrI_A_nidulans_FGSC_A4:2624600-2628452 | WT_5hasex | WT_veg | OK     | 23,9698  | 41,5119 | 0,792308  | -1,64903   | 0,0991416  | 0,287569   | no  |
| AN6615 | ChrI_A_nidulans_FGSC_A4:2629055-2634845 | WT_5hasex | WT_veg | OK     | 14,3034  | 22,8724 | 0,677251  | -1,42562   | 0,153978   | 0,385623   | no  |
| AN6617 | ChrI_A_nidulans_FGSC_A4:2638517-2642000 | WT_5hasex | WT_veg | OK     | 5,20392  | 10,1329 | 0,961379  | -1,67431   | 0,0940705  | 0,277311   | no  |
| AN6618 | ChrI_A_nidulans_FGSC_A4:2642349-2645419 | WT_5hasex | WT_veg | OK     | 56,5507  | 126,624 | 1,16293   | -2,41208   | 0,0158619  | 0,0746885  | no  |
| AN6620 | ChrI_A_nidulans_FGSC_A4:2652199-2653425 | WT_5hasex | WT_veg | OK     | 18,4144  | 13,1288 | -0,488097 | 0,805093   | 0,420766   | 0,688941   | no  |
| AN6621 | ChrI_A_nidulans_FGSC_A4:2653530-2654967 | WT_5hasex | WT_veg | OK     | 22,0718  | 25,328  | 0,198529  | -0,36924   | 0,711949   | 0,876182   | no  |
| AN6622 | ChrI_A_nidulans_FGSC_A4:2655700-2656978 | WT_5hasex | WT_veg | OK     | 4,6895   | 11,1195 | 1,24558   | -1,75834   | 0,0786902  | 0,244923   | no  |
| AN6623 | ChrI_A_nidulans_FGSC_A4:2658410-2660188 | WT_5hasex | WT_veg | OK     | 42,983   | 96,9386 | 1,1733    | -2,3968    | 0,0165388  | 0,0771185  | no  |
| AN6624 | ChrI_A_nidulans_FGSC_A4:2661085-2665137 | WT_5hasex | WT_veg | OK     | 21,7756  | 10,0768 | -1,11168  | 1,77427    | 0,076018   | 0,239079   | no  |
| AN6625 | ChrI_A_nidulans_FGSC_A4:2666534-2670002 | WT_5hasex | WT_veg | OK     | 9,65634  | 17,1993 | 0,832802  | -1,49565   | 0,134745   | 0,35377    | no  |
| AN6626 | ChrI_A_nidulans_FGSC_A4:2671838-2672729 | WT_5hasex | WT_veg | OK     | 8,89939  | 12,13   | 0,446798  | -0,598173  | 0,549724   | 0,781941   | no  |
| AN6627 | ChrI_A_nidulans_FGSC_A4:2673225-2675317 | WT_5hasex | WT_veg | OK     | 44,6175  | 90,3421 | 1,01779   | -2,10859   | 0,0349799  | 0,136477   | no  |
| AN6628 | ChrI_A_nidulans_FGSC_A4:2675459-2676760 | WT_5hasex | WT_veg | OK     | 30,351   | 72,4646 | 1,25553   | -2,40341   | 0,016243   | 0,0761124  | no  |
| AN6629 | ChrI_A_nidulans_FGSC_A4:2677993-2679141 | WT_5hasex | WT_veg | OK     | 893,264  | 1255,71 | 0,491348  | -0,851201  | 0,394658   | 0,667663   | no  |
| AN6630 | ChrI_A_nidulans_FGSC_A4:2679303-2680503 | WT_5hasex | WT_veg | OK     | 481,883  | 729,009 | 0,597253  | -1,09769   | 0,272342   | 0,544876   | no  |
| AN6631 | ChrI_A_nidulans_FGSC_A4:2680711-2681635 | WT_5hasex | WT_veg | OK     | 569,808  | 1158,83 | 1,02413   | -1,99706   | 0,045819   | 0,166818   | no  |
| AN6632 | ChrI_A_nidulans_FGSC_A4:2682286-2683080 | WT_5hasex | WT_veg | OK     | 1341,16  | 2011,53 | 0,584811  | -1,0637    | 0,287465   | 0,561723   | no  |
| AN6633 | ChrI_A_nidulans_FGSC_A4:2683974-2684394 | WT_5hasex | WT_veg | OK     | 497,524  | 5549,39 | 3,47949   | -7,00134   | 2,5353E-12 | 1,3286E-10 | yes |
| AN6634 | ChrI_A_nidulans_FGSC_A4:2685202-2686534 | WT_5hasex | WT_veg | OK     | 10,6942  | 93,7242 | 3,1316    | -5,32536   | 1,0076E-07 | 2,3445E-06 | yes |
| AN6636 | ChrI_A_nidulans_FGSC_A4:2689122-2691312 | WT_5hasex | WT_veg | OK     | 71,8292  | 153,91  | 1,09944   | -2,27653   | 0,0228141  | 0,0983704  | no  |
| AN6640 | ChrI_A_nidulans_FGSC_A4:2701688-2703141 | WT_5hasex | WT_veg | OK     | 18,8316  | 36,4393 | 0,952343  | -1,63874   | 0,101267   | 0,292101   | no  |
| AN6641 | ChrI_A_nidulans_FGSC_A4:2704645-2706304 | WT_5hasex | WT_veg | NOTEST | 1,10725  | 2,43439 | 1,13658   | -1,0154    | 0,309915   | 1          | no  |
| AN6646 | ChrI_A_nidulans_FGSC_A4:2721339-2722272 | WT_5hasex | WT_veg | OK     | 38,0562  | 102,564 | 1,43032   | -2,76776   | 0,00564428 | 0,0328198  | yes |
| AN6647 | ChrI_A_nidulans_FGSC_A4:2722609-2723978 | WT_5hasex | WT_veg | OK     | 5,77946  | 14,1712 | 1,29396   | -1,91072   | 0,0560401  | 0,192376   | no  |
| AN6648 | ChrI_A_nidulans_FGSC_A4:2727636-2728907 | WT_5hasex | WT_veg | OK     | 11,3405  | 6,53235 | -0,795806 | 1,16566    | 0,243754   | 0,511091   | no  |
| AN6651 | ChrI_A_nidulans_FGSC_A4:2734372-2738239 | WT_5hasex | WT_veg | OK     | 20,4876  | 196,855 | 3,26431   | -6,72893   | 1,7092E-11 | 7,8434E-10 | yes |
| AN6654 | ChrI_A_nidulans_FGSC_A4:2744973-2746609 | WT_5hasex | WT_veg | OK     | 60,3247  | 70,7598 | 0,23018   | -0,462523  | 0,643706   | 0,838029   | no  |
| AN6657 | ChrI_A_nidulans_FGSC_A4:2751297-2751944 | WT_5hasex | WT_veg | OK     | 2246,93  | 516,92  | -2,11994  | 3,54421    | 0,00039379 | 0,0035474  | yes |
| AN6658 | ChrI_A_nidulans_FGSC_A4:2752523-2754446 | WT_5hasex | WT_veg | OK     | 17,8092  | 24,6585 | 0,469462  | -0,85853   | 0,3906     | 0,663843   | no  |
| AN6659 | ChrI_A_nidulans_FGSC_A4:2757462-2758460 | WT_5hasex | WT_veg | OK     | 7,10283  | 22,8572 | 1,68618   | -2,21537   | 0,0267344  | 0,111      | no  |
| AN6660 | ChrI_A_nidulans_FGSC_A4:2760230-2760725 | WT_5hasex | WT_veg | NOTEST | 0        | 0       | 0         | 0          | 1          | 1          | no  |
| AN6661 | ChrI_A_nidulans_FGSC_A4:2763754-2765088 | WT_5hasex | WT_veg | NOTEST | 0,486433 | 1,30825 | 1,42733   | -0,785984  | 0,431877   | 1          | no  |
| AN6663 | ChrI_A_nidulans_FGSC_A4:2771878-2774120 | WT_5hasex | WT_veg | NOTEST | 1,55228  | 2,97702 | 0,939481  | -1,1873    | 0,235108   | 1          | no  |
| AN6664 | ChrI_A_nidulans_FGSC_A4:2776400-2777873 | WT_5hasex | WT_veg | OK     | 2,64377  | 1,04772 | -1,33534  | 1,22653    | 0,219999   | 0,481333   | no  |



## Supplementary table 1

|        |                                         |           |        |        |          |         |               |               |            |            |      |
|--------|-----------------------------------------|-----------|--------|--------|----------|---------|---------------|---------------|------------|------------|------|
| AN6665 | ChrI_A_nidulans_FGSC_A4:2780028-2780585 | WT_5hasex | WT_veg | NOTEST | 0        | 0       | 0             | 0             | 1          | 1          | no   |
| AN6666 | ChrI_A_nidulans_FGSC_A4:2781466-2782228 | WT_5hasex | WT_veg | OK     | 1,31656  | 5,18487 | 1,97753       | -2,10093      | 0,035647   | 0,138547   | no   |
| AN6667 | ChrI_A_nidulans_FGSC_A4:2782718-2784839 | WT_5hasex | WT_veg | NOTEST | 1,52064  | 3,63748 | 1,25826       | -1,59498      | 0,110717   | 0,110717   | no   |
| AN6668 | ChrI_A_nidulans_FGSC_A4:2785296-2786471 | WT_5hasex | WT_veg | OK     | 0,958339 | 6,06704 | 2,66238       | -2,75349      | 0,00589642 | 0,0339916  | yes  |
| AN6669 | ChrI_A_nidulans_FGSC_A4:2786973-2788951 | WT_5hasex | WT_veg | OK     | 7,19892  | 18,1872 | 1,33707       | -2,21201      | 0,0269657  | 0,111687   | no   |
| AN6670 | ChrI_A_nidulans_FGSC_A4:2795200-2796409 | WT_5hasex | WT_veg | NOTEST | 0,666144 | 0       | -1.79769e+308 | -1.79769e+308 | 0,0908325  | 0,0908325  | 1 no |
| AN6671 | ChrI_A_nidulans_FGSC_A4:2797698-2798326 | WT_5hasex | WT_veg | NOTEST | 0        | 0       | 0             | 0             | 1          | 1          | no   |
| AN6672 | ChrI_A_nidulans_FGSC_A4:2800567-2801072 | WT_5hasex | WT_veg | NOTEST | 0,459654 | 2,61541 | 2,50842       | -1,40756      | 0,159262   | 0,159262   | 1 no |
| AN6674 | ChrI_A_nidulans_FGSC_A4:2808301-2808972 | WT_5hasex | WT_veg | OK     | 66,2962  | 101,141 | 0,609365      | -1,10999      | 0,267005   | 0,538657   | no   |
| AN6675 | ChrI_A_nidulans_FGSC_A4:2809448-2813017 | WT_5hasex | WT_veg | OK     | 32,1864  | 37,3372 | 0,214164      | -0,445103     | 0,656245   | 0,845156   | no   |
| AN6676 | ChrI_A_nidulans_FGSC_A4:2813445-2815674 | WT_5hasex | WT_veg | OK     | 49,1991  | 155,853 | 1,66348       | -3,40582      | 0,00065966 | 0,00550609 | yes  |
| AN6677 | ChrI_A_nidulans_FGSC_A4:2815944-2817077 | WT_5hasex | WT_veg | OK     | 33,2145  | 65,4976 | 0,97963       | -1,84472      | 0,0650786  | 0,214064   | no   |
| AN6678 | ChrI_A_nidulans_FGSC_A4:2817518-2820136 | WT_5hasex | WT_veg | OK     | 4,3292   | 7,61228 | 0,81423       | -1,26147      | 0,207138   | 0,464277   | no   |
| AN6679 | ChrI_A_nidulans_FGSC_A4:2820277-2821489 | WT_5hasex | WT_veg | OK     | 1435,36  | 1784,7  | 0,314268      | -0,535275     | 0,59246    | 0,808323   | no   |
| AN6681 | ChrI_A_nidulans_FGSC_A4:2830971-2833281 | WT_5hasex | WT_veg | OK     | 82,4813  | 179,546 | 1,12221       | -2,31099      | 0,0208336  | 0,0919811  | no   |
| AN6682 | ChrI_A_nidulans_FGSC_A4:2833494-2834828 | WT_5hasex | WT_veg | OK     | 8,1962   | 15,4318 | 0,912876      | -1,45758      | 0,144957   | 0,370899   | no   |
| AN6683 | ChrI_A_nidulans_FGSC_A4:2835703-2837560 | WT_5hasex | WT_veg | OK     | 4,13878  | 2,38503 | -0,795196     | 1,03933       | 0,298652   | 0,574058   | no   |
| AN6684 | ChrI_A_nidulans_FGSC_A4:2838261-2840765 | WT_5hasex | WT_veg | OK     | 10,5705  | 17,2456 | 0,706182      | -1,28226      | 0,199752   | 0,453979   | no   |
| AN6685 | ChrI_A_nidulans_FGSC_A4:2841397-2845476 | WT_5hasex | WT_veg | OK     | 81,4618  | 153,869 | 0,917503      | -1,80456      | 0,0711438  | 0,228115   | no   |
| AN6686 | ChrI_A_nidulans_FGSC_A4:2847770-2848978 | WT_5hasex | WT_veg | OK     | 6,62916  | 7,31316 | 0,141669      | -0,201231     | 0,840518   | 0,936805   | no   |
| AN6687 | ChrI_A_nidulans_FGSC_A4:2849260-2851640 | WT_5hasex | WT_veg | OK     | 80,5654  | 222,372 | 1,46474       | -3,0116       | 0,00259875 | 0,0173468  | yes  |
| AN6689 | ChrI_A_nidulans_FGSC_A4:2856695-2858415 | WT_5hasex | WT_veg | OK     | 237,347  | 524,872 | 1,14497       | -2,27128      | 0,0231298  | 0,0994215  | no   |
| AN6690 | ChrI_A_nidulans_FGSC_A4:2858921-2860280 | WT_5hasex | WT_veg | OK     | 44,6013  | 191,403 | 2,10146       | -4,20771      | 2,5798E-05 | 0,00033445 | yes  |
| AN6691 | ChrI_A_nidulans_FGSC_A4:2861580-2864587 | WT_5hasex | WT_veg | OK     | 18,2496  | 10,7853 | -0,758804     | 1,3281        | 0,184145   | 0,43235    | no   |
| AN6692 | ChrI_A_nidulans_FGSC_A4:2864858-2865681 | WT_5hasex | WT_veg | OK     | 8,83674  | 13,1748 | 0,576193      | -0,770706     | 0,440881   | 0,705049   | no   |
| AN6693 | ChrI_A_nidulans_FGSC_A4:2866254-2866989 | WT_5hasex | WT_veg | OK     | 432,307  | 1016    | 1,23278       | -1,94753      | 0,0514712  | 0,181141   | no   |
| AN6694 | ChrI_A_nidulans_FGSC_A4:2868600-2871790 | WT_5hasex | WT_veg | OK     | 10,7069  | 19,2026 | 0,842764      | -1,63128      | 0,102832   | 0,295378   | no   |
| AN6696 | ChrI_A_nidulans_FGSC_A4:2880051-2881890 | WT_5hasex | WT_veg | OK     | 16,2477  | 22,7653 | 0,486602      | -0,897767     | 0,36931    | 0,643905   | no   |
| AN6698 | ChrI_A_nidulans_FGSC_A4:2888379-2889761 | WT_5hasex | WT_veg | OK     | 36,1611  | 220,485 | 2,60817       | -5,09906      | 3,4134E-07 | 7,0421E-06 | yes  |
| AN6699 | ChrI_A_nidulans_FGSC_A4:2889992-2891367 | WT_5hasex | WT_veg | OK     | 68,7297  | 109,629 | 0,673629      | -1,39986      | 0,161556   | 0,397419   | no   |
| AN6700 | ChrI_A_nidulans_FGSC_A4:2894421-2897319 | WT_5hasex | WT_veg | OK     | 282,311  | 2146,49 | 2,92662       | -4,83404      | 1,3379E-06 | 2,3866E-05 | yes  |
| AN6701 | ChrI_A_nidulans_FGSC_A4:2900579-2901699 | WT_5hasex | WT_veg | OK     | 85,6842  | 301,466 | 1,81489       | -3,73348      | 0,00018885 | 0,00189732 | yes  |
| AN6702 | ChrI_A_nidulans_FGSC_A4:2904689-2908354 | WT_5hasex | WT_veg | OK     | 19,5477  | 33,345  | 0,770467      | -1,58303      | 0,113415   | 0,31554    | no   |
| AN6703 | ChrI_A_nidulans_FGSC_A4:2909576-2911175 | WT_5hasex | WT_veg | OK     | 38,8404  | 55,1085 | 0,504717      | -0,835563     | 0,403401   | 0,674672   | no   |
| AN6704 | ChrI_A_nidulans_FGSC_A4:2912550-2913476 | WT_5hasex | WT_veg | OK     | 28,8118  | 74,9405 | 1,37909       | -2,36356      | 0,0181002  | 0,0824701  | no   |
| AN6705 | ChrI_A_nidulans_FGSC_A4:2913792-2916246 | WT_5hasex | WT_veg | OK     | 31,6981  | 64,097  | 1,01586       | -2,11032      | 0,0348309  | 0,136142   | no   |
| AN6706 | ChrI_A_nidulans_FGSC_A4:2916856-2918941 | WT_5hasex | WT_veg | OK     | 11,1918  | 36,1063 | 1,68981       | -3,09463      | 0,00197059 | 0,0138107  | yes  |
| AN6707 | ChrI_A_nidulans_FGSC_A4:2919208-2921266 | WT_5hasex | WT_veg | OK     | 10,6483  | 13,1489 | 0,304323      | -0,540609     | 0,588777   | 0,806406   | no   |
| AN6710 | ChrI_A_nidulans_FGSC_A4:2930228-2931075 | WT_5hasex | WT_veg | OK     | 64,3847  | 156,698 | 1,2832        | -2,57164      | 0,0101217  | 0,0526157  | no   |
| AN6711 | ChrI_A_nidulans_FGSC_A4:2931249-2933307 | WT_5hasex | WT_veg | OK     | 79,7615  | 386,373 | 2,27623       | -4,64936      | 3,3296E-06 | 5,4002E-05 | yes  |
| AN6713 | ChrI_A_nidulans_FGSC_A4:2943563-2945296 | WT_5hasex | WT_veg | OK     | 32,4604  | 73,1031 | 1,17125       | -2,2927       | 0,0218652  | 0,095369   | no   |
| AN6714 | ChrI_A_nidulans_FGSC_A4:2945426-2948485 | WT_5hasex | WT_veg | OK     | 9,91816  | 21,0179 | 1,08348       | -2,06786      | 0,0386528  | 0,147105   | no   |
| AN6715 | ChrI_A_nidulans_FGSC_A4:2949905-2952694 | WT_5hasex | WT_veg | OK     | 19,4949  | 26,413  | 0,438154      | -0,875881     | 0,381095   | 0,655381   | no   |
| AN6716 | ChrI_A_nidulans_FGSC_A4:2953294-2954419 | WT_5hasex | WT_veg | OK     | 15,9788  | 26,1428 | 0,710257      | -1,22157      | 0,221869   | 0,483365   | no   |
| AN6718 | ChrI_A_nidulans_FGSC_A4:2959680-2962350 | WT_5hasex | WT_veg | OK     | 40,0148  | 97,7173 | 1,28808       | -2,5518       | 0,0107167  | 0,0550026  | no   |
| AN6719 | ChrI_A_nidulans_FGSC_A4:2965375-2966163 | WT_5hasex | WT_veg | OK     | 5,53022  | 5,36881 | -0,0427332    | 0,048933      | 0,960973   | 0,985593   | no   |
| AN6721 | ChrI_A_nidulans_FGSC_A4:2976771-2978397 | WT_5hasex | WT_veg | OK     | 58,8773  | 101,518 | 0,785949      | -1,62661      | 0,10382    | 0,297419   | no   |
| AN6724 | ChrI_A_nidulans_FGSC_A4:2986370-2989161 | WT_5hasex | WT_veg | NOTEST | 0,983632 | 1,96262 | 0,996592      | -1,24603      | 0,212753   | 0,212753   | 1 no |
| AN6725 | ChrI_A_nidulans_FGSC_A4:2990055-2991474 | WT_5hasex | WT_veg | OK     | 21,0662  | 74,6457 | 1,82513       | -3,41166      | 0,00064568 | 0,00540926 | yes  |
| AN6726 | ChrI_A_nidulans_FGSC_A4:2991676-2992809 | WT_5hasex | WT_veg | OK     | 238,751  | 444,815 | 0,897696      | -1,8259       | 0,0678649  | 0,220598   | no   |
| AN6727 | ChrI_A_nidulans_FGSC_A4:2994616-2995627 | WT_5hasex | WT_veg | OK     | 10,4022  | 9,01536 | -0,206437     | 0,309845      | 0,756679   | 0,899446   | no   |
| AN6728 | ChrI_A_nidulans_FGSC_A4:2995741-2997028 | WT_5hasex | WT_veg | OK     | 5,33916  | 10,8955 | 1,02905       | -1,49593      | 0,134672   | 0,353667   | no   |
| AN6729 | ChrI_A_nidulans_FGSC_A4:2997391-2998828 | WT_5hasex | WT_veg | OK     | 4,42023  | 6,03078 | 0,448223      | -0,641863     | 0,520962   | 0,764183   | no   |

## Supplementary table 1

|        |                                         |           |        |        |          |          |               |               |            |            |     |
|--------|-----------------------------------------|-----------|--------|--------|----------|----------|---------------|---------------|------------|------------|-----|
| AN6732 | ChrI_A_nidulans_FGSC_A4:3006006-3007172 | WT_5hasex | WT_veg | OK     | 148,805  | 252,168  | 0,760962      | -1,5575       | 0,119351   | 0,326523   | no  |
| AN6733 | ChrI_A_nidulans_FGSC_A4:3007557-3010628 | WT_5hasex | WT_veg | OK     | 45,2772  | 63,5246  | 0,48853       | -0,975913     | 0,329108   | 0,605613   | no  |
| AN6734 | ChrI_A_nidulans_FGSC_A4:3014512-3017690 | WT_5hasex | WT_veg | OK     | 32,9521  | 37,7574  | 0,196389      | -0,406157     | 0,684627   | 0,861245   | no  |
| AN6735 | ChrI_A_nidulans_FGSC_A4:3018528-3019099 | WT_5hasex | WT_veg | OK     | 196,253  | 244,746  | 0,318569      | -0,646862     | 0,517721   | 0,761768   | no  |
| AN6736 | ChrI_A_nidulans_FGSC_A4:3020385-3021249 | WT_5hasex | WT_veg | OK     | 12,8196  | 9,85674  | -0,379163     | 0,547054      | 0,584342   | 0,803798   | no  |
| AN6737 | ChrI_A_nidulans_FGSC_A4:3021494-3022116 | WT_5hasex | WT_veg | OK     | 81,0857  | 57,2654  | -0,501784     | 0,974915      | 0,329602   | 0,606071   | no  |
| AN6739 | ChrI_A_nidulans_FGSC_A4:3027855-3029136 | WT_5hasex | WT_veg | OK     | 116,258  | 76,663   | -0,600732     | 0,94477       | 0,344776   | 0,620155   | no  |
| AN6740 | ChrI_A_nidulans_FGSC_A4:3032835-3034013 | WT_5hasex | WT_veg | OK     | 39,9765  | 39,4014  | -0,020906     | 0,0376987     | 0,969928   | 0,989084   | no  |
| AN6741 | ChrI_A_nidulans_FGSC_A4:3034099-3035795 | WT_5hasex | WT_veg | OK     | 79,7357  | 88,3451  | 0,147924      | -0,300119     | 0,764087   | 0,90277    | no  |
| AN6742 | ChrI_A_nidulans_FGSC_A4:3038674-3040973 | WT_5hasex | WT_veg | OK     | 15,7218  | 5,40171  | -1,54128      | 2,75554       | 0,00585946 | 0,0338321  | yes |
| AN6744 | ChrI_A_nidulans_FGSC_A4:3044303-3044719 | WT_5hasex | WT_veg | NOTEST | 0        | 0        | 0             | 0             | 1          | 1          | no  |
| AN6745 | ChrI_A_nidulans_FGSC_A4:3045097-3046704 | WT_5hasex | WT_veg | NOTEST | 0,161726 | 0        | -1.79769e+308 | -1.79769e+308 | 0,224063   | 1          | no  |
| AN6746 | ChrI_A_nidulans_FGSC_A4:3046974-3047969 | WT_5hasex | WT_veg | NOTEST | 0,776502 | 0        | -1.79769e+308 | -1.79769e+308 | 0,0908325  | 1          | no  |
| AN6747 | ChrI_A_nidulans_FGSC_A4:3048839-3051756 | WT_5hasex | WT_veg | NOTEST | 0,08713  | 0,298727 | 1,77758       | -0,781929     | 0,434256   | 1          | no  |
| AN6749 | ChrI_A_nidulans_FGSC_A4:3055206-3056606 | WT_5hasex | WT_veg | OK     | 10,7696  | 18,7034  | 0,796333      | -1,27822      | 0,201173   | 0,456261   | no  |
| AN6750 | ChrI_A_nidulans_FGSC_A4:3057395-3058870 | WT_5hasex | WT_veg | OK     | 94,4096  | 17,5253  | -2,42949      | 4,37641       | 1,2065E-05 | 0,00016977 | yes |
| AN6751 | ChrI_A_nidulans_FGSC_A4:3059206-3061124 | WT_5hasex | WT_veg | NOTEST | 0,429965 | 0,341117 | -0,333954     | 0,212264      | 0,831901   | 1          | no  |
| AN6753 | ChrI_A_nidulans_FGSC_A4:3065363-3066640 | WT_5hasex | WT_veg | OK     | 121,697  | 245,381  | 1,01173       | -1,63747      | 0,101533   | 0,292702   | no  |
| AN6754 | ChrI_A_nidulans_FGSC_A4:3067500-3069853 | WT_5hasex | WT_veg | OK     | 42,0737  | 44,4391  | 0,0789104     | -0,147431     | 0,882792   | 0,955549   | no  |
| AN6755 | ChrI_A_nidulans_FGSC_A4:3070232-3072373 | WT_5hasex | WT_veg | OK     | 7,02859  | 4,59791  | -0,612257     | 0,984771      | 0,324737   | 0,601387   | no  |
| AN6756 | ChrI_A_nidulans_FGSC_A4:3073892-3074426 | WT_5hasex | WT_veg | OK     | 10,8291  | 1,2395   | -3,12708      | 2,15          | 0,0315548  | 0,126243   | no  |
| AN6757 | ChrI_A_nidulans_FGSC_A4:3074805-3077180 | WT_5hasex | WT_veg | OK     | 17,0441  | 13,537   | -0,332367     | 0,626827      | 0,530772   | 0,770047   | no  |
| AN6758 | ChrI_A_nidulans_FGSC_A4:3078198-3081218 | WT_5hasex | WT_veg | OK     | 31,4527  | 46,4598  | 0,562799      | -1,15438      | 0,248344   | 0,5165     | no  |
| AN6759 | ChrI_A_nidulans_FGSC_A4:3081749-3083786 | WT_5hasex | WT_veg | OK     | 14,4242  | 13,0551  | -0,143881     | 0,254061      | 0,799448   | 0,919005   | no  |
| AN6760 | ChrI_A_nidulans_FGSC_A4:3083948-3084653 | WT_5hasex | WT_veg | OK     | 17,3794  | 13,7621  | -0,33667      | 0,526777      | 0,598349   | 0,812223   | no  |
| AN6761 | ChrI_A_nidulans_FGSC_A4:3085369-3086824 | WT_5hasex | WT_veg | OK     | 1,67869  | 8,04577  | 2,26089       | -2,41109      | 0,0159051  | 0,0748437  | no  |
| AN6762 | ChrI_A_nidulans_FGSC_A4:3086997-3089260 | WT_5hasex | WT_veg | NOTEST | 0,935563 | 3,66377  | 1,96942       | -2,23651      | 0,0253186  | 1          | no  |
| AN6763 | ChrI_A_nidulans_FGSC_A4:3090881-3092466 | WT_5hasex | WT_veg | OK     | 28,2461  | 53,7853  | 0,929163      | -1,76782      | 0,0770907  | 0,241415   | no  |
| AN6764 | ChrI_A_nidulans_FGSC_A4:3095380-3096907 | WT_5hasex | WT_veg | NOTEST | 0        | 0        | 0             | 0             | 1          | 1          | no  |
| AN6766 | ChrI_A_nidulans_FGSC_A4:3100491-3103283 | WT_5hasex | WT_veg | NOTEST | 0        | 0        | 0             | 0             | 1          | 1          | no  |
| AN6767 | ChrI_A_nidulans_FGSC_A4:3100491-3103283 | WT_5hasex | WT_veg | OK     | 2,74896  | 11,1853  | 2,02465       | -2,29918      | 0,021495   | 0,0941081  | no  |
| AN6768 | ChrI_A_nidulans_FGSC_A4:3104444-3107434 | WT_5hasex | WT_veg | OK     | 6,58374  | 13,896   | 1,0777        | -1,80359      | 0,0712957  | 0,22842    | no  |
| AN6769 | ChrI_A_nidulans_FGSC_A4:3107451-3109092 | WT_5hasex | WT_veg | OK     | 17,8761  | 77,7466  | 2,12075       | -3,54807      | 0,00038806 | 0,00350127 | yes |
| AN6770 | ChrI_A_nidulans_FGSC_A4:3110920-3112895 | WT_5hasex | WT_veg | OK     | 4,58905  | 21,4886  | 2,2273        | -2,82333      | 0,0047528  | 0,0285779  | yes |
| AN6771 | ChrI_A_nidulans_FGSC_A4:3113932-3115826 | WT_5hasex | WT_veg | NOTEST | 0,319445 | 0,522772 | 0,710612      | -0,426167     | 0,669986   | 1          | no  |
| AN6772 | ChrI_A_nidulans_FGSC_A4:3117075-3118194 | WT_5hasex | WT_veg | NOTEST | 0,743877 | 2,24434  | 1,59315       | -1,35885      | 0,174194   | 1          | no  |
| AN6773 | ChrI_A_nidulans_FGSC_A4:3119089-3120436 | WT_5hasex | WT_veg | NOTEST | 0,505333 | 0        | -1.79769e+308 | -1.79769e+308 | 0,0908325  | 1          | no  |
| AN6774 | ChrI_A_nidulans_FGSC_A4:3120967-3122558 | WT_5hasex | WT_veg | OK     | 11,918   | 73,4039  | 2,62271       | -4,48106      | 7,4273E-06 | 0,00011044 | yes |
| AN6776 | ChrI_A_nidulans_FGSC_A4:3127972-3128734 | WT_5hasex | WT_veg | OK     | 1,15903  | 6,68945  | 2,52898       | -2,49309      | 0,0126635  | 0,0627652  | no  |
| AN6777 | ChrI_A_nidulans_FGSC_A4:3131863-3133527 | WT_5hasex | WT_veg | NOTEST | 0,443243 | 0        | -1.79769e+308 | -1.79769e+308 | 0,0561526  | 1          | no  |
| AN6778 | ChrI_A_nidulans_FGSC_A4:3135796-3137655 | WT_5hasex | WT_veg | OK     | 1,47059  | 6,15039  | 2,06429       | -2,62185      | 0,00874538 | 0,0468632  | yes |
| AN6779 | ChrI_A_nidulans_FGSC_A4:3139889-3144575 | WT_5hasex | WT_veg | OK     | 25,3268  | 245,45   | 3,2767        | -6,72077      | 1,8076E-11 | 8,246E-10  | yes |
| AN6780 | ChrI_A_nidulans_FGSC_A4:3145439-3146034 | WT_5hasex | WT_veg | OK     | 17,3637  | 55,7739  | 1,68352       | -2,50431      | 0,012269   | 0,0612223  | no  |
| AN6781 | ChrI_A_nidulans_FGSC_A4:3146740-3148397 | WT_5hasex | WT_veg | NOTEST | 0,25067  | 1,82325  | 2,86265       | -1,3864       | 0,165626   | 1          | no  |
| AN6782 | ChrI_A_nidulans_FGSC_A4:3150168-3151819 | WT_5hasex | WT_veg | NOTEST | 1,52134  | 1,90631  | 0,325441      | -0,315676     | 0,752248   | 1          | no  |
| AN6783 | ChrI_A_nidulans_FGSC_A4:3153273-3155066 | WT_5hasex | WT_veg | OK     | 13,8274  | 46,5273  | 1,75055       | -3,12051      | 0,00180538 | 0,0128088  | yes |
| AN6785 | ChrI_A_nidulans_FGSC_A4:3158688-3160359 | WT_5hasex | WT_veg | OK     | 6,21949  | 12,1377  | 0,964622      | -1,44635      | 0,148078   | 0,375731   | no  |
| AN6786 | ChrI_A_nidulans_FGSC_A4:3163473-3164539 | WT_5hasex | WT_veg | OK     | 6,8686   | 14,6366  | 1,09149       | -1,55376      | 0,120241   | 0,32815    | no  |
| AN6788 | ChrI_A_nidulans_FGSC_A4:3170948-3173090 | WT_5hasex | WT_veg | OK     | 25,0631  | 16,9806  | -0,561678     | 0,905845      | 0,365018   | 0,639884   | no  |
| AN6789 | ChrI_A_nidulans_FGSC_A4:3174104-3175160 | WT_5hasex | WT_veg | OK     | 140,561  | 59,1542  | -1,24864      | 2,53755       | 0,0111632  | 0,0567934  | no  |
| AN6790 | ChrI_A_nidulans_FGSC_A4:3177757-3179747 | WT_5hasex | WT_veg | OK     | 17,1784  | 16,3598  | -0,0704388    | 0,129766      | 0,896751   | 0,960569   | no  |
| AN6791 | ChrI_A_nidulans_FGSC_A4:3181547-3189431 | WT_5hasex | WT_veg | OK     | 1,33517  | 5,89848  | 2,14332       | -3,39365      | 0,00068968 | 0,00572114 | yes |
| AN6793 | ChrI_A_nidulans_FGSC_A4:3191440-3192679 | WT_5hasex | WT_veg | OK     | 39,8877  | 75,9961  | 0,929982      | -1,83772      | 0,066104   | 0,216471   | no  |

## Supplementary table 1

|        |                                         |           |        |        |          |          |               |               |            |            |     |
|--------|-----------------------------------------|-----------|--------|--------|----------|----------|---------------|---------------|------------|------------|-----|
| AN6794 | ChrI_A_nidulans_FGSC_A4:3196568-3197393 | WT_5hasex | WT_veg | OK     | 11,8427  | 27,3983  | 1,21009       | -1,73405      | 0,082909   | 0,254174   | no  |
| AN6795 | ChrI_A_nidulans_FGSC_A4:3198442-3199129 | WT_5hasex | WT_veg | OK     | 19,5326  | 21,3413  | 0,127761      | -0,205358     | 0,837293   | 0,935279   | no  |
| AN6796 | ChrI_A_nidulans_FGSC_A4:3199280-3200159 | WT_5hasex | WT_veg | OK     | 324,846  | 386,041  | 0,248998      | -0,422316     | 0,672795   | 0,840301   | no  |
| AN6797 | ChrI_A_nidulans_FGSC_A4:3202191-3202613 | WT_5hasex | WT_veg | OK     | 8,27689  | 45,9221  | 2,47203       | -2,83037      | 0,00464948 | 0,0280629  | yes |
| AN6798 | ChrI_A_nidulans_FGSC_A4:3202854-3205136 | WT_5hasex | WT_veg | NOTEST | 0,210454 | 0        | -1.79769e+308 | -1.79769e+308 | 0,122325   | 1          | no  |
| AN6801 | ChrI_A_nidulans_FGSC_A4:3213005-3213786 | WT_5hasex | WT_veg | OK     | 9,56059  | 42,149   | 2,14033       | -3,27585      | 0,00105344 | 0,00819631 | yes |
| AN6802 | ChrI_A_nidulans_FGSC_A4:3219506-3221568 | WT_5hasex | WT_veg | OK     | 1,53111  | 6,9099   | 2,17409       | -2,67211      | 0,00753753 | 0,0415858  | yes |
| AN6803 | ChrI_A_nidulans_FGSC_A4:3222691-3225097 | WT_5hasex | WT_veg | NOTEST | 0,391657 | 0,331677 | -0,23981      | 0,158055      | 0,874413   | 1          | no  |
| AN6804 | ChrI_A_nidulans_FGSC_A4:3225930-3228749 | WT_5hasex | WT_veg | OK     | 19,3982  | 218,445  | 3,49328       | -6,78445      | 1,1653E-11 | 5,5014E-10 | yes |
| AN6805 | ChrI_A_nidulans_FGSC_A4:3237764-3239652 | WT_5hasex | WT_veg | OK     | 6,62203  | 20,6139  | 1,63827       | -2,61154      | 0,00901342 | 0,048016   | yes |
| AN6806 | ChrI_A_nidulans_FGSC_A4:3241190-3242498 | WT_5hasex | WT_veg | NOTEST | 1,44557  | 1,34797  | -0,100858     | 0,0899612     | 0,928318   | 1          | no  |
| AN6808 | ChrI_A_nidulans_FGSC_A4:3249899-3251118 | WT_5hasex | WT_veg | OK     | 2,91885  | 3,51373  | 0,267602      | -0,312209     | 0,754881   | 0,898274   | no  |
| AN6809 | ChrI_A_nidulans_FGSC_A4:3251822-3253158 | WT_5hasex | WT_veg | OK     | 25,1216  | 23,9041  | -0,0716721    | 0,125083      | 0,900458   | 0,961718   | no  |
| AN6811 | ChrI_A_nidulans_FGSC_A4:3258984-3260530 | WT_5hasex | WT_veg | NOTEST | 0,165364 | 0,62665  | 1,92201       | -0,808518     | 0,418792   | 1          | no  |
| AN6812 | ChrI_A_nidulans_FGSC_A4:3260708-3261785 | WT_5hasex | WT_veg | OK     | 48,2514  | 22,607   | -1,0938       | 1,8914        | 0,0585712  | 0,198717   | no  |
| AN6813 | ChrI_A_nidulans_FGSC_A4:3264118-3265540 | WT_5hasex | WT_veg | NOTEST | 0,408155 | 1,03577  | 1,34352       | -0,739833     | 0,459401   | 1          | no  |
| AN6814 | ChrI_A_nidulans_FGSC_A4:3265894-3267779 | WT_5hasex | WT_veg | OK     | 2,33527  | 5,83567  | 1,32131       | -1,8453       | 0,0649943  | 0,213894   | no  |
| AN6815 | ChrI_A_nidulans_FGSC_A4:3267926-3269453 | WT_5hasex | WT_veg | OK     | 45,3099  | 54,7089  | 0,27195       | -0,524177     | 0,600155   | 0,813347   | no  |
| AN6816 | ChrI_A_nidulans_FGSC_A4:3271019-3272895 | WT_5hasex | WT_veg | OK     | 28,5661  | 75,7064  | 1,40611       | -2,8243       | 0,00473844 | 0,0285026  | yes |
| AN6817 | ChrI_A_nidulans_FGSC_A4:3273151-3274319 | WT_5hasex | WT_veg | OK     | 13,5305  | 35,2966  | 1,38331       | -2,34151      | 0,0192057  | 0,0862841  | no  |
| AN6818 | ChrI_A_nidulans_FGSC_A4:3274557-3275434 | WT_5hasex | WT_veg | NOTEST | 1,26016  | 3,05832  | 1,27913       | -1,2078       | 0,227124   | 1          | no  |
| AN6819 | ChrI_A_nidulans_FGSC_A4:3275791-3276790 | WT_5hasex | WT_veg | OK     | 10,5707  | 27,1885  | 1,36293       | -1,9556       | 0,0505119  | 0,178822   | no  |
| AN6820 | ChrI_A_nidulans_FGSC_A4:3277884-3281841 | WT_5hasex | WT_veg | OK     | 47,5444  | 327,271  | 2,78314       | -5,23641      | 1,6373E-07 | 3,6248E-06 | yes |
| AN6821 | ChrI_A_nidulans_FGSC_A4:3284123-3285317 | WT_5hasex | WT_veg | OK     | 48,1355  | 57,6755  | 0,260857      | -0,480837     | 0,630632   | 0,830775   | no  |
| AN6822 | ChrI_A_nidulans_FGSC_A4:3285702-3287246 | WT_5hasex | WT_veg | OK     | 6,58168  | 31,789   | 2,272         | -3,55385      | 0,00037964 | 0,00343591 | yes |
| AN6823 | ChrI_A_nidulans_FGSC_A4:3287591-3289172 | WT_5hasex | WT_veg | OK     | 30,0847  | 56,4798  | 0,908703      | -1,80148      | 0,0716279  | 0,229204   | no  |
| AN6824 | ChrI_A_nidulans_FGSC_A4:3295384-3297723 | WT_5hasex | WT_veg | OK     | 133,182  | 617,837  | 2,21382       | -4,22185      | 2,423E-05  | 0,00031608 | yes |
| AN6825 | ChrI_A_nidulans_FGSC_A4:3299625-3300460 | WT_5hasex | WT_veg | OK     | 43,0466  | 69,2024  | 0,684925      | -1,31559      | 0,18831    | 0,438188   | no  |
| AN6826 | ChrI_A_nidulans_FGSC_A4:3300876-3302319 | WT_5hasex | WT_veg | OK     | 15,4343  | 22,7227  | 0,557996      | -1,02209      | 0,30674    | 0,582859   | no  |
| AN6827 | ChrI_A_nidulans_FGSC_A4:3302727-3303258 | WT_5hasex | WT_veg | OK     | 17,5115  | 48,5152  | 1,47013       | -2,25555      | 0,0240988  | 0,10251    | no  |
| AN6828 | ChrI_A_nidulans_FGSC_A4:3303762-3307480 | WT_5hasex | WT_veg | OK     | 10,9778  | 22,2083  | 1,01651       | -1,99465      | 0,0460812  | 0,167551   | no  |
| AN6829 | ChrI_A_nidulans_FGSC_A4:3311054-3313284 | WT_5hasex | WT_veg | NOTEST | 0,489189 | 0,375505 | -0,381561     | 0,256794      | 0,797338   | 1          | no  |
| AN6831 | ChrI_A_nidulans_FGSC_A4:3318251-3320065 | WT_5hasex | WT_veg | OK     | 19,0914  | 1,39996  | -3,76947      | 4,5512        | 5,334E-06  | 8,204E-05  | yes |
| AN6832 | ChrI_A_nidulans_FGSC_A4:3321132-3323427 | WT_5hasex | WT_veg | OK     | 5,60465  | 3,2774   | -0,774072     | 1,1604        | 0,245888   | 0,51365    | no  |
| AN6833 | ChrI_A_nidulans_FGSC_A4:3328512-3329265 | WT_5hasex | WT_veg | OK     | 1,98559  | 0        | -1.79769e+308 | -1.79769e+308 | 0,0375581  | 0,143955   | no  |
| AN6834 | ChrI_A_nidulans_FGSC_A4:3330226-3332056 | WT_5hasex | WT_veg | OK     | 3,15059  | 5,56487  | 0,820727      | -1,11118      | 0,266489   | 0,538154   | no  |
| AN6836 | ChrI_A_nidulans_FGSC_A4:3338837-3339717 | WT_5hasex | WT_veg | OK     | 8,04716  | 14,6951  | 0,868787      | -1,21367      | 0,224875   | 0,487038   | no  |
| AN6837 | ChrI_A_nidulans_FGSC_A4:3341945-3343548 | WT_5hasex | WT_veg | OK     | 7,64006  | 11,0249  | 0,529109      | -0,829901     | 0,406595   | 0,677114   | no  |
| AN6839 | ChrI_A_nidulans_FGSC_A4:3347321-3348176 | WT_5hasex | WT_veg | OK     | 9,71736  | 9,27225  | -0,0676451    | 0,0966608     | 0,922996   | 0,970817   | no  |
| AN6840 | ChrI_A_nidulans_FGSC_A4:3352048-3353273 | WT_5hasex | WT_veg | OK     | 143,292  | 321,855  | 1,16745       | -2,42858      | 0,015158   | 0,0720788  | no  |
| AN6841 | ChrI_A_nidulans_FGSC_A4:3353922-3354536 | WT_5hasex | WT_veg | OK     | 30,0244  | 53,0795  | 0,82202       | -1,40301      | 0,160615   | 0,39624    | no  |
| AN6842 | ChrI_A_nidulans_FGSC_A4:3354665-3355971 | WT_5hasex | WT_veg | OK     | 54,5035  | 137,045  | 1,33022       | -2,72981      | 0,00633717 | 0,0361547  | yes |
| AN6843 | ChrI_A_nidulans_FGSC_A4:3356142-3357192 | WT_5hasex | WT_veg | OK     | 97,4891  | 203,086  | 1,05878       | -2,17938      | 0,0293032  | 0,119136   | no  |
| AN6844 | ChrI_A_nidulans_FGSC_A4:3357442-3359233 | WT_5hasex | WT_veg | OK     | 66,7397  | 106,183  | 0,669943      | -1,38356      | 0,166495   | 0,40527    | no  |
| AN6845 | ChrI_A_nidulans_FGSC_A4:3359444-3361120 | WT_5hasex | WT_veg | OK     | 7,42395  | 11,2736  | 0,602685      | -0,944457     | 0,344936   | 0,620329   | no  |
| AN6846 | ChrI_A_nidulans_FGSC_A4:3361293-3363390 | WT_5hasex | WT_veg | OK     | 2,20442  | 3,11184  | 0,497366      | -0,666424     | 0,50514    | 0,753226   | no  |
| AN6847 | ChrI_A_nidulans_FGSC_A4:3363468-3365472 | WT_5hasex | WT_veg | OK     | 8,75867  | 19,0021  | 1,11737       | -1,93808      | 0,0526138  | 0,183854   | no  |
| AN6848 | ChrI_A_nidulans_FGSC_A4:3366035-3367797 | WT_5hasex | WT_veg | NOTEST | 1,22491  | 2,77653  | 1,18061       | -1,38887      | 0,164871   | 1          | no  |
| AN6849 | ChrI_A_nidulans_FGSC_A4:3368172-3369295 | WT_5hasex | WT_veg | OK     | 166,766  | 235,641  | 0,498763      | -0,923642     | 0,355673   | 0,631064   | no  |
| AN6850 | ChrI_A_nidulans_FGSC_A4:3370138-3372492 | WT_5hasex | WT_veg | OK     | 14,5011  | 34,1365  | 1,23516       | -2,28307      | 0,0224262  | 0,0970891  | no  |
| AN6853 | ChrI_A_nidulans_FGSC_A4:3381116-3382575 | WT_5hasex | WT_veg | OK     | 30,3862  | 47,4516  | 0,643042      | -1,27298      | 0,203023   | 0,458868   | no  |
| AN6854 | ChrI_A_nidulans_FGSC_A4:3382774-3383294 | WT_5hasex | WT_veg | OK     | 35,1275  | 122,173  | 1,79825       | -3,05381      | 0,00225957 | 0,0154678  | yes |
| AN6856 | ChrI_A_nidulans_FGSC_A4:3387757-3388378 | WT_5hasex | WT_veg | OK     | 672,858  | 6049,1   | 3,16835       | -5,71992      | 1,0658E-08 | 3,0708E-07 | yes |

# Supplementary table 1

|        |                                         |           |        |        |          |          |               |               |            |            |     |
|--------|-----------------------------------------|-----------|--------|--------|----------|----------|---------------|---------------|------------|------------|-----|
| AN6857 | ChrI_A_nidulans_FGSC_A4:3388383-3390041 | WT_5hasex | WT_veg | OK     | 12,3007  | 14,445   | 0,231838      | -0,409249     | 0,682357   | 0,859836   | no  |
| AN6858 | ChrI_A_nidulans_FGSC_A4:3390999-3393350 | WT_5hasex | WT_veg | OK     | 8,8938   | 12,9351  | 0,540416      | -0,970398     | 0,331848   | 0,608152   | no  |
| AN6859 | ChrI_A_nidulans_FGSC_A4:3397618-3399862 | WT_5hasex | WT_veg | OK     | 108,245  | 245,129  | 1,17924       | -2,38796      | 0,0169423  | 0,0785966  | no  |
| AN6862 | ChrI_A_nidulans_FGSC_A4:3403700-3404146 | WT_5hasex | WT_veg | OK     | 104,224  | 41,3745  | -1,33288      | 2,40052       | 0,0163717  | 0,0765376  | no  |
| AN6864 | ChrI_A_nidulans_FGSC_A4:3407292-3408961 | WT_5hasex | WT_veg | OK     | 23,8512  | 83,5486  | 1,80855       | -3,59635      | 0,00032271 | 0,00299625 | yes |
| AN6865 | ChrI_A_nidulans_FGSC_A4:3409501-3410436 | WT_5hasex | WT_veg | OK     | 35,469   | 115,952  | 1,7089        | -3,14759      | 0,0016462  | 0,0118691  | yes |
| AN6867 | ChrI_A_nidulans_FGSC_A4:3412968-3415346 | WT_5hasex | WT_veg | OK     | 52,7317  | 75,5396  | 0,518562      | -1,07301      | 0,283266   | 0,557044   | no  |
| AN6868 | ChrI_A_nidulans_FGSC_A4:3416146-3417973 | WT_5hasex | WT_veg | OK     | 5,91972  | 9,97358  | 0,752582      | -1,20493      | 0,228231   | 0,491262   | no  |
| AN6869 | ChrI_A_nidulans_FGSC_A4:3418802-3420277 | WT_5hasex | WT_veg | OK     | 11,6033  | 10,7049  | -0,116265     | 0,160169      | 0,872748   | 0,951241   | no  |
| AN6870 | ChrI_A_nidulans_FGSC_A4:3421281-3422862 | WT_5hasex | WT_veg | OK     | 6,1374   | 2,92186  | -1,07074      | 1,43889       | 0,15018    | 0,379316   | no  |
| AN6871 | ChrI_A_nidulans_FGSC_A4:3423877-3425909 | WT_5hasex | WT_veg | OK     | 4,43437  | 5,09755  | 0,201075      | -0,239344     | 0,810839   | 0,924189   | no  |
| AN6872 | ChrI_A_nidulans_FGSC_A4:3427739-3428396 | WT_5hasex | WT_veg | NOTEST | 0        | 1,43932  | 1.79769e+308  | 1.79769e+308  | 0,123323   | 1          | no  |
| AN6873 | ChrI_A_nidulans_FGSC_A4:3429895-3431088 | WT_5hasex | WT_veg | OK     | 5,47574  | 7,25176  | 0,405276      | -0,474084     | 0,63544    | 0,833329   | no  |
| AN6874 | ChrI_A_nidulans_FGSC_A4:3431502-3433088 | WT_5hasex | WT_veg | OK     | 115,564  | 178,339  | 0,625928      | -1,27568      | 0,202069   | 0,457613   | no  |
| AN6875 | ChrI_A_nidulans_FGSC_A4:3433806-3439155 | WT_5hasex | WT_veg | OK     | 27,8273  | 37,3331  | 0,423951      | -0,887106     | 0,375022   | 0,649714   | no  |
| AN6876 | ChrI_A_nidulans_FGSC_A4:3444658-3446484 | WT_5hasex | WT_veg | OK     | 7,59346  | 25,4469  | 1,74466       | -2,39382      | 0,0166738  | 0,0776109  | no  |
| AN6877 | ChrI_A_nidulans_FGSC_A4:3446825-3447797 | WT_5hasex | WT_veg | OK     | 7,1022   | 7,51914  | 0,0823028     | -0,114215     | 0,909068   | 0,965425   | no  |
| AN6878 | ChrI_A_nidulans_FGSC_A4:3448329-3450464 | WT_5hasex | WT_veg | OK     | 6,84379  | 7,68218  | 0,166719      | -0,269135     | 0,787826   | 0,913415   | no  |
| AN6879 | ChrI_A_nidulans_FGSC_A4:3451065-3453023 | WT_5hasex | WT_veg | OK     | 59,4941  | 96,0896  | 0,691633      | -1,39039      | 0,164411   | 0,401981   | no  |
| AN6880 | ChrI_A_nidulans_FGSC_A4:3453953-3458077 | WT_5hasex | WT_veg | OK     | 18,8727  | 21,9605  | 0,218614      | -0,434292     | 0,664077   | 0,84975    | no  |
| AN6881 | ChrI_A_nidulans_FGSC_A4:3463446-3464372 | WT_5hasex | WT_veg | OK     | 237,106  | 1433,28  | 2,59571       | -4,63611      | 3,5502E-06 | 5,7067E-05 | yes |
| AN6882 | ChrI_A_nidulans_FGSC_A4:3465118-3466233 | WT_5hasex | WT_veg | NOTEST | 0,202128 | 0,885977 | 2,132         | -0,888761     | 0,374131   | 1          | no  |
| AN6883 | ChrI_A_nidulans_FGSC_A4:3466801-3468654 | WT_5hasex | WT_veg | NOTEST | 0,307247 | 0,562577 | 0,872652      | -0,484714     | 0,627879   | 1          | no  |
| AN6884 | ChrI_A_nidulans_FGSC_A4:3469375-3471729 | WT_5hasex | WT_veg | OK     | 1,02161  | 6,43925  | 2,65604       | -3,19571      | 0,0013949  | 0,0103356  | yes |
| AN6885 | ChrI_A_nidulans_FGSC_A4:3472601-3473601 | WT_5hasex | WT_veg | OK     | 13,2258  | 30,8361  | 1,22127       | -1,98282      | 0,0473872  | 0,171101   | no  |
| AN6887 | ChrI_A_nidulans_FGSC_A4:3477668-3479738 | WT_5hasex | WT_veg | OK     | 12,9557  | 37,5912  | 1,53681       | -2,89204      | 0,00382753 | 0,0239458  | yes |
| AN6889 | ChrI_A_nidulans_FGSC_A4:3484509-3487921 | WT_5hasex | WT_veg | OK     | 4,86775  | 9,03161  | 0,891728      | -1,47611      | 0,139915   | 0,362423   | no  |
| AN6890 | ChrI_A_nidulans_FGSC_A4:3488569-3490494 | WT_5hasex | WT_veg | OK     | 40,0242  | 60,3492  | 0,592461      | -1,2239       | 0,220989   | 0,482551   | no  |
| AN6891 | ChrI_A_nidulans_FGSC_A4:3490769-3492208 | WT_5hasex | WT_veg | OK     | 112,91   | 196,418  | 0,798755      | -1,61702      | 0,105873   | 0,301539   | no  |
| AN6892 | ChrI_A_nidulans_FGSC_A4:3492775-3494532 | WT_5hasex | WT_veg | OK     | 61,8874  | 103,594  | 0,743218      | -1,5017       | 0,133174   | 0,351018   | no  |
| AN6895 | ChrI_A_nidulans_FGSC_A4:3502621-3504958 | WT_5hasex | WT_veg | OK     | 7,46373  | 12,0096  | 0,686221      | -1,16271      | 0,244946   | 0,512524   | no  |
| AN6896 | ChrI_A_nidulans_FGSC_A4:3505476-3508186 | WT_5hasex | WT_veg | OK     | 8,47403  | 11,5448  | 0,446124      | -0,788326     | 0,430506   | 0,696987   | no  |
| AN6897 | ChrI_A_nidulans_FGSC_A4:3509541-3512497 | WT_5hasex | WT_veg | OK     | 71,5368  | 139,656  | 0,965122      | -1,90952      | 0,0561951  | 0,19276    | no  |
| AN6898 | ChrI_A_nidulans_FGSC_A4:3512679-3513878 | WT_5hasex | WT_veg | OK     | 91,967   | 240,64   | 1,38769       | -2,83911      | 0,00452395 | 0,0274602  | yes |
| AN6899 | ChrI_A_nidulans_FGSC_A4:3515405-3517115 | WT_5hasex | WT_veg | OK     | 15,2002  | 46,1338  | 1,60174       | -3,01066      | 0,00260683 | 0,0173884  | yes |
| AN6902 | ChrI_A_nidulans_FGSC_A4:3520704-3521597 | WT_5hasex | WT_veg | OK     | 39,5348  | 243,525  | 2,62287       | -4,8387       | 1,3069E-06 | 2,3382E-05 | yes |
| AN6903 | ChrI_A_nidulans_FGSC_A4:3522421-3523708 | WT_5hasex | WT_veg | OK     | 53,3748  | 106,89   | 1,0019        | -2,04629      | 0,0407277  | 0,152804   | no  |
| AN6904 | ChrI_A_nidulans_FGSC_A4:3523980-3524643 | WT_5hasex | WT_veg | OK     | 116,127  | 247,039  | 1,08904       | -2,21038      | 0,0270785  | 0,112047   | no  |
| AN6905 | ChrI_A_nidulans_FGSC_A4:3525020-3526061 | WT_5hasex | WT_veg | OK     | 13,4668  | 43,7831  | 1,70097       | -2,75203      | 0,00592278 | 0,0341137  | yes |
| AN6906 | ChrI_A_nidulans_FGSC_A4:3526403-3528221 | WT_5hasex | WT_veg | OK     | 146,316  | 292,632  | 1             | -2,00076      | 0,0454178  | 0,165691   | no  |
| AN6908 | ChrI_A_nidulans_FGSC_A4:3539796-3542224 | WT_5hasex | WT_veg | OK     | 53,206   | 56,2378  | 0,079951      | -0,166015     | 0,868145   | 0,949561   | no  |
| AN6910 | ChrI_A_nidulans_FGSC_A4:3542878-3545548 | WT_5hasex | WT_veg | OK     | 40,5501  | 65,7161  | 0,696541      | -1,33218      | 0,182802   | 0,430351   | no  |
| AN6912 | ChrI_A_nidulans_FGSC_A4:3548528-3549132 | WT_5hasex | WT_veg | OK     | 43,1104  | 110,737  | 1,36104       | -2,42691      | 0,0152282  | 0,0723274  | no  |
| AN6913 | ChrI_A_nidulans_FGSC_A4:3549353-3551312 | WT_5hasex | WT_veg | OK     | 15,1347  | 34,5807  | 1,1921        | -2,2247       | 0,0261305  | 0,10919    | no  |
| AN6914 | ChrI_A_nidulans_FGSC_A4:3551487-3552272 | WT_5hasex | WT_veg | OK     | 92,7621  | 266,727  | 1,52376       | -3,1371       | 0,0017063  | 0,0122267  | yes |
| AN6915 | ChrI_A_nidulans_FGSC_A4:3552645-3554662 | WT_5hasex | WT_veg | OK     | 44,3535  | 171,987  | 1,95518       | -4,02618      | 5,6692E-05 | 0,00066818 | yes |
| AN6916 | ChrI_A_nidulans_FGSC_A4:3557547-3560356 | WT_5hasex | WT_veg | OK     | 2,18301  | 7,13855  | 1,70931       | -1,80714      | 0,0707403  | 0,227224   | no  |
| AN6917 | ChrI_A_nidulans_FGSC_A4:3569267-3570214 | WT_5hasex | WT_veg | OK     | 7,811    | 11,2277  | 0,523482      | -0,725574     | 0,4681     | 0,726559   | no  |
| AN6918 | ChrI_A_nidulans_FGSC_A4:3570459-3571504 | WT_5hasex | WT_veg | OK     | 57,5616  | 53,171   | -0,114468     | 0,20681       | 0,836158   | 0,934869   | no  |
| AN6921 | ChrI_A_nidulans_FGSC_A4:3577887-3578949 | WT_5hasex | WT_veg | OK     | 945,164  | 2385,02  | 1,33536       | -2,4009       | 0,0163548  | 0,0764928  | no  |
| AN6922 | ChrI_A_nidulans_FGSC_A4:3579662-3581097 | WT_5hasex | WT_veg | OK     | 95,6288  | 187,037  | 0,967805      | -2,01073      | 0,044354   | 0,162828   | no  |
| AN6924 | ChrI_A_nidulans_FGSC_A4:3587126-3589004 | WT_5hasex | WT_veg | OK     | 40,537   | 67,7418  | 0,740806      | -1,41586      | 0,156816   | 0,390268   | no  |
| AN6926 | ChrI_A_nidulans_FGSC_A4:3600123-3602305 | WT_5hasex | WT_veg | NOTEST | 0,1084   | 0        | -1.79769e+308 | -1.79769e+308 | 0,165569   | 1          | no  |

## Supplementary table 1

|        |                                          |           |        |        |          |          |               |               |            |            |     |
|--------|------------------------------------------|-----------|--------|--------|----------|----------|---------------|---------------|------------|------------|-----|
| AN6928 | ChrI_A_nidulans_FGSC_A4:3604041-3607014  | WT_5hasex | WT_veg | NOTEST | 0,463075 | 0,484568 | 0,0654545     | -0,0426564    | 0,965975   | 1          | no  |
| AN6929 | ChrI_A_nidulans_FGSC_A4:3608392-3611360  | WT_5hasex | WT_veg | NOTEST | 0        | 0        | 0             | 0             | 1          | 1          | no  |
| AN6930 | ChrI_A_nidulans_FGSC_A4:3613604-3615138  | WT_5hasex | WT_veg | OK     | 30,1123  | 29,8874  | -0,0108141    | 0,0170985     | 0,986358   | 0,995063   | no  |
| AN6931 | ChrI_A_nidulans_FGSC_A4:3615292-3616663  | WT_5hasex | WT_veg | OK     | 15,8148  | 79,9815  | 2,33839       | -4,1954       | 2,7239E-05 | 0,00035166 | yes |
| AN6934 | ChrI_A_nidulans_FGSC_A4:3623160-3625051  | WT_5hasex | WT_veg | OK     | 2,82666  | 13,9375  | 2,30181       | -3,27404      | 0,00106022 | 0,00824178 | yes |
| AN6935 | ChrI_A_nidulans_FGSC_A4:3625898-3626720  | WT_5hasex | WT_veg | NOTEST | 0        | 0        | 0             | 0             | 1          | 1          | no  |
| AN6936 | ChrI_A_nidulans_FGSC_A4:3627340-3627991  | WT_5hasex | WT_veg | NOTEST | 1,14344  | 1,32841  | 0,216325      | -0,145578     | 0,884255   | 1          | no  |
| AN6937 | ChrI_A_nidulans_FGSC_A4:3629403-3630602  | WT_5hasex | WT_veg | NOTEST | 0,627377 | 0        | -1.79769e+308 | -1.79769e+308 | 0,0908325  | 1          | no  |
| AN6940 | ChrI_A_nidulans_FGSC_A4:3643283-3644638  | WT_5hasex | WT_veg | OK     | 34,3679  | 388,164  | 3,49753       | -5,87557      | 4,2139E-09 | 1,315E-07  | yes |
| AN6941 | ChrI_A_nidulans_FGSC_A4:3645674-3646892  | WT_5hasex | WT_veg | OK     | 44,5079  | 157,371  | 1,82203       | -2,99337      | 0,00275919 | 0,0182306  | yes |
| AN6942 | ChrI_A_nidulans_FGSC_A4:3650101-3652548  | WT_5hasex | WT_veg | NOTEST | 0,571112 | 0,896845 | 0,651085      | -0,552659     | 0,580497   | 1          | no  |
| AN6943 | ChrI_A_nidulans_FGSC_A4:3652848-3654006  | WT_5hasex | WT_veg | OK     | 1,20515  | 4,79044  | 1,99095       | -2,2913       | 0,0219459  | 0,0956269  | no  |
| AN6944 | ChrI_A_nidulans_FGSC_A4:3654556-3656009  | WT_5hasex | WT_veg | OK     | 6,1233   | 30,4595  | 2,31451       | -3,59716      | 0,00032171 | 0,00298856 | yes |
| AN6945 | ChrI_A_nidulans_FGSC_A4:3656319-3657809  | WT_5hasex | WT_veg | OK     | 2,08953  | 0,135445 | -3,9474       | 1,31704       | 0,187825   | 0,437577   | no  |
| AN6946 | ChrI_A_nidulans_FGSC_A4:3658410-3659992  | WT_5hasex | WT_veg | OK     | 6,48449  | 0        | -1.79769e+308 | -1.79769e+308 | 0,0114182  | 0,0578494  | no  |
| AN6947 | ChrI_A_nidulans_FGSC_A4:3660134-3661257  | WT_5hasex | WT_veg | NOTEST | 0,232395 | 0        | -1.79769e+308 | -1.79769e+308 | 0,165569   | 1          | no  |
| AN6949 | ChrI_A_nidulans_FGSC_A4:3667131-3669848  | WT_5hasex | WT_veg | OK     | 13,1206  | 22,4925  | 0,777616      | -1,41539      | 0,156955   | 0,390485   | no  |
| AN6950 | ChrI_A_nidulans_FGSC_A4:3670553-3671522  | WT_5hasex | WT_veg | OK     | 10,5579  | 6,83301  | -0,627725     | 0,883305      | 0,377072   | 0,651821   | no  |
| AN6951 | ChrI_A_nidulans_FGSC_A4:3672904-3673736  | WT_5hasex | WT_veg | NOTEST | 0        | 0        | 0             | 0             | 1          | 1          | no  |
| AN6952 | ChrI_A_nidulans_FGSC_A4:3677359-3678853  | WT_5hasex | WT_veg | OK     | 3,12044  | 13,4152  | 2,10405       | -2,92854      | 0,0034056  | 0,0217555  | yes |
| AN6953 | ChrI_A_nidulans_FGSC_A4:3679944-3681393  | WT_5hasex | WT_veg | OK     | 5,76889  | 0,623628 | -3,20954      | 2,30566       | 0,0211296  | 0,0929745  | no  |
| AN6954 | ChrI_A_nidulans_FGSC_A4:3682781-3683282  | WT_5hasex | WT_veg | OK     | 19,0638  | 4,81234  | -1,98602      | 2,23643       | 0,0253236  | 0,106501   | no  |
| AN6955 | ChrI_A_nidulans_FGSC_A4:3687024-3688933  | WT_5hasex | WT_veg | NOTEST | 0,683621 | 1,02483  | 0,584111      | -0,487367     | 0,625998   | 1          | no  |
| AN6957 | ChrI_A_nidulans_FGSC_A4:3692525-3693445  | WT_5hasex | WT_veg | NOTEST | 0        | 0        | 0             | 0             | 1          | 1          | no  |
| AN6958 | ChrI_A_nidulans_FGSC_A4:3704870-3705771  | WT_5hasex | WT_veg | NOTEST | 0        | 1,40797  | 1.79769e+308  | 1.79769e+308  | 0,123323   | 1          | no  |
| AN6960 | ChrI_A_nidulans_FGSC_A4:3715298-3721652  | WT_5hasex | WT_veg | OK     | 8,93572  | 11,7898  | 0,399886      | -0,686041     | 0,492687   | 0,744479   | no  |
| AN6961 | ChrI_A_nidulans_FGSC_A4:3724871-3725411  | WT_5hasex | WT_veg | NOTEST | 0,888253 | 0,358551 | -1,30879      | 0,417851      | 0,676056   | 1          | no  |
| AN6962 | ChrI_A_nidulans_FGSC_A4:3727593-3728612  | WT_5hasex | WT_veg | OK     | 3,06619  | 2,1527   | -0,510296     | 0,46302       | 0,64335    | 0,83789    | no  |
| AN6963 | ChrI_A_nidulans_FGSC_A4:3730062-3731362  | WT_5hasex | WT_veg | OK     | 38,4128  | 86,7773  | 1,17573       | -2,05597      | 0,0397851  | 0,150279   | no  |
| AN6964 | ChrI_A_nidulans_FGSC_A4:3733136-3733790  | WT_5hasex | WT_veg | OK     | 8,12711  | 14,149   | 0,799887      | -1,11614      | 0,264363   | 0,535429   | no  |
| AN6965 | ChrI_A_nidulans_FGSC_A4:3735180-3736029  | WT_5hasex | WT_veg | NOTEST | 0,287635 | 0        | -1.79769e+308 | -1.79769e+308 | 0,224063   | 1          | no  |
| AN6966 | ChrI_A_nidulans_FGSC_A4:3736777-3737848  | WT_5hasex | WT_veg | NOTEST | 0,894498 | 1,80019  | 1,009         | -0,877801     | 0,380052   | 1          | no  |
| AN6967 | ChrI_A_nidulans_FGSC_A4:3738813-3739078  | WT_5hasex | WT_veg | NOTEST | 0        | 0        | 0             | 0             | 1          | 1          | no  |
| AN6968 | ChrI_A_nidulans_FGSC_A4:3739309-3742139  | WT_5hasex | WT_veg | OK     | 5,77963  | 11,9335  | 1,04597       | -1,74603      | 0,0808063  | 0,249465   | no  |
| AN6969 | ChrI_A_nidulans_FGSC_A4:3742375-3743248  | WT_5hasex | WT_veg | NOTEST | 1,20734  | 3,85009  | 1,67306       | -1,67945      | 0,0930645  | 1          | no  |
| AN6971 | ChrI_A_nidulans_FGSC_A4:3751566-3753573  | WT_5hasex | WT_veg | NOTEST | 0        | 0        | 0             | 0             | 1          | 1          | no  |
| AN6972 | ChrI_A_nidulans_FGSC_A4:3756285-3757668  | WT_5hasex | WT_veg | OK     | 5,15872  | 13,7246  | 1,41168       | -2,12027      | 0,0339837  | 0,133685   | no  |
| AN6973 | ChrIV_A_nidulans_FGSC_A4:1438934-1440314 | WT_5hasex | WT_veg | OK     | 889,437  | 3485,61  | 1,97045       | -3,33453      | 0,00085443 | 0,00687766 | yes |
| AN6976 | ChrIV_A_nidulans_FGSC_A4:1417466-1418501 | WT_5hasex | WT_veg | OK     | 585,73   | 915,364  | 0,644109      | -1,24321      | 0,213791   | 0,47313    | no  |
| AN6977 | ChrIV_A_nidulans_FGSC_A4:1415760-1416874 | WT_5hasex | WT_veg | OK     | 33,2889  | 51,4719  | 0,628747      | -1,20639      | 0,227667   | 0,490703   | no  |
| AN6979 | ChrIV_A_nidulans_FGSC_A4:1410826-1412810 | WT_5hasex | WT_veg | OK     | 13,6207  | 18,233   | 0,420759      | -0,782112     | 0,434148   | 0,699878   | no  |
| AN6983 | ChrIV_A_nidulans_FGSC_A4:1399389-1401920 | WT_5hasex | WT_veg | OK     | 10,9206  | 14,0638  | 0,364932      | -0,628697     | 0,529547   | 0,76917    | no  |
| AN6984 | ChrIV_A_nidulans_FGSC_A4:1399389-1401920 | WT_5hasex | WT_veg | OK     | 70,0526  | 110,44   | 0,656755      | -1,33859      | 0,180705   | 0,427237   | no  |
| AN6985 | ChrIV_A_nidulans_FGSC_A4:1396459-1398682 | WT_5hasex | WT_veg | OK     | 39,2525  | 95,0265  | 1,27554       | -2,63115      | 0,00850959 | 0,0458246  | yes |
| AN6986 | ChrIV_A_nidulans_FGSC_A4:1392257-1395895 | WT_5hasex | WT_veg | OK     | 53,2525  | 81,6264  | 0,616188      | -1,23829      | 0,215609   | 0,4755     | no  |
| AN6988 | ChrIV_A_nidulans_FGSC_A4:1383541-1385063 | WT_5hasex | WT_veg | OK     | 203,559  | 328,298  | 0,689561      | -1,38498      | 0,16606    | 0,404701   | no  |
| AN6992 | ChrIV_A_nidulans_FGSC_A4:1370429-1372429 | WT_5hasex | WT_veg | OK     | 172,195  | 505,608  | 1,55397       | -3,18427      | 0,00145122 | 0,0106837  | yes |
| AN6993 | ChrIV_A_nidulans_FGSC_A4:1370429-1372429 | WT_5hasex | WT_veg | OK     | 37,7716  | 407,915  | 3,4329        | -6,78498      | 1,161E-11  | 5,486E-10  | yes |
| AN6995 | ChrIV_A_nidulans_FGSC_A4:1366742-1367292 | WT_5hasex | WT_veg | OK     | 12,4706  | 23,0993  | 0,889322      | -1,10688      | 0,268346   | 0,540123   | no  |
| AN6996 | ChrIV_A_nidulans_FGSC_A4:1363581-1366020 | WT_5hasex | WT_veg | OK     | 103,153  | 300,414  | 1,54216       | -2,93831      | 0,00330007 | 0,021182   | yes |
| AN6997 | ChrIV_A_nidulans_FGSC_A4:1362746-1363480 | WT_5hasex | WT_veg | OK     | 9,39034  | 42,0891  | 2,1642        | -3,26354      | 0,00110031 | 0,00850042 | yes |
| AN6998 | ChrIV_A_nidulans_FGSC_A4:1360243-1362224 | WT_5hasex | WT_veg | OK     | 22,0311  | 41,0688  | 0,8985        | -1,75741      | 0,0788484  | 0,245299   | no  |
| AN6999 | ChrIV_A_nidulans_FGSC_A4:1357913-1359405 | WT_5hasex | WT_veg | OK     | 6,08885  | 3,65369  | -0,736817     | 1,03378       | 0,301238   | 0,576912   | no  |

## Supplementary table 1

|        |                                          |           |        |        |          |          |               |               |            |            |     |
|--------|------------------------------------------|-----------|--------|--------|----------|----------|---------------|---------------|------------|------------|-----|
| AN7000 | ChrIV_A_nidulans_FGSC_A4:1355401-1357641 | WT_5hasex | WT_veg | OK     | 217,793  | 445,349  | 1,03198       | -2,01518      | 0,0438856  | 0,161478   | no  |
| AN7001 | ChrIV_A_nidulans_FGSC_A4:1353362-1354139 | WT_5hasex | WT_veg | OK     | 32,3738  | 82,6909  | 1,3529        | -2,48871      | 0,0128207  | 0,06338    | no  |
| AN7002 | ChrIV_A_nidulans_FGSC_A4:1351117-1352989 | WT_5hasex | WT_veg | OK     | 19,3042  | 27,6291  | 0,517269      | -0,998699     | 0,31794    | 0,594113   | no  |
| AN7003 | ChrIV_A_nidulans_FGSC_A4:1349558-1350939 | WT_5hasex | WT_veg | OK     | 737,617  | 1201,89  | 0,704356      | -1,28497      | 0,198802   | 0,452763   | no  |
| AN7004 | ChrIV_A_nidulans_FGSC_A4:1346713-1348775 | WT_5hasex | WT_veg | OK     | 32,8125  | 59,1774  | 0,850801      | -1,63899      | 0,101215   | 0,291984   | no  |
| AN7005 | ChrIV_A_nidulans_FGSC_A4:1342996-1345915 | WT_5hasex | WT_veg | OK     | 11,9318  | 11,3266  | -0,0751027    | 0,145133      | 0,884606   | 0,956034   | no  |
| AN7006 | ChrIV_A_nidulans_FGSC_A4:1341675-1342850 | WT_5hasex | WT_veg | OK     | 16,018   | 80,0664  | 2,3215        | -4,0909       | 4,297E-05  | 0,00052549 | yes |
| AN7007 | ChrIV_A_nidulans_FGSC_A4:1337678-1341343 | WT_5hasex | WT_veg | OK     | 15,6691  | 29,968   | 0,935495      | -1,8642       | 0,0622929  | 0,207453   | no  |
| AN7009 | ChrIV_A_nidulans_FGSC_A4:1333889-1335466 | WT_5hasex | WT_veg | OK     | 9,57025  | 15,3279  | 0,679533      | -1,13418      | 0,256719   | 0,526595   | no  |
| AN7010 | ChrIV_A_nidulans_FGSC_A4:1332215-1333379 | WT_5hasex | WT_veg | OK     | 91,5177  | 105,834  | 0,209674      | -0,372241     | 0,709713   | 0,875027   | no  |
| AN7011 | ChrIV_A_nidulans_FGSC_A4:1329617-1332058 | WT_5hasex | WT_veg | OK     | 184,616  | 1437,49  | 2,96095       | -5,767        | 8,0696E-09 | 2,3877E-07 | yes |
| AN7012 | ChrIV_A_nidulans_FGSC_A4:1327056-1328889 | WT_5hasex | WT_veg | OK     | 15,5317  | 6,96757  | -1,15648      | 1,96182       | 0,0497832  | 0,177022   | no  |
| AN7013 | ChrIV_A_nidulans_FGSC_A4:1319320-1321626 | WT_5hasex | WT_veg | OK     | 22,936   | 30,0766  | 0,391029      | -0,778629     | 0,436198   | 0,701495   | no  |
| AN7014 | ChrIV_A_nidulans_FGSC_A4:1314561-1319077 | WT_5hasex | WT_veg | OK     | 25,1636  | 52,3399  | 1,05657       | -2,17508      | 0,029624   | 0,120179   | no  |
| AN7015 | ChrIV_A_nidulans_FGSC_A4:1311249-1312811 | WT_5hasex | WT_veg | OK     | 21,0685  | 26,92    | 0,353587      | -0,668639     | 0,503726   | 0,752308   | no  |
| AN7016 | ChrIV_A_nidulans_FGSC_A4:1307441-1310462 | WT_5hasex | WT_veg | OK     | 42,9318  | 58,9523  | 0,457502      | -0,94247      | 0,345952   | 0,62136    | no  |
| AN7017 | ChrIV_A_nidulans_FGSC_A4:1306234-1307415 | WT_5hasex | WT_veg | OK     | 26,4169  | 115,597  | 2,12957       | -4,11527      | 3,8673E-05 | 0,00047898 | yes |
| AN7018 | ChrIV_A_nidulans_FGSC_A4:1304199-1305340 | WT_5hasex | WT_veg | OK     | 396,324  | 1423,47  | 1,84466       | -3,304        | 0,00095316 | 0,00755177 | yes |
| AN7020 | ChrIV_A_nidulans_FGSC_A4:1294231-1294813 | WT_5hasex | WT_veg | NOTEST | 0,567348 | 0        | -1.79769e+308 | -1.79769e+308 | 0,224063   | 1          | no  |
| AN7021 | ChrIV_A_nidulans_FGSC_A4:1290189-1291724 | WT_5hasex | WT_veg | NOTEST | 0,458902 | 1,44324  | 1,65306       | -1,13731      | 0,25541    | 1          | no  |
| AN7023 | ChrIV_A_nidulans_FGSC_A4:1284579-1285095 | WT_5hasex | WT_veg | NOTEST | 0,612567 | 2,29525  | 1,90571       | -0,83829      | 0,401868   | 1          | no  |
| AN7024 | ChrIV_A_nidulans_FGSC_A4:1283429-1283895 | WT_5hasex | WT_veg | NOTEST | 0        | 2,19771  | 1.79769e+308  | 1.79769e+308  | 0,123323   | 1          | no  |
| AN7025 | ChrIV_A_nidulans_FGSC_A4:1279531-1280809 | WT_5hasex | WT_veg | OK     | 112,154  | 228,468  | 1,02651       | -1,96257      | 0,049696   | 0,176806   | no  |
| AN7026 | ChrIV_A_nidulans_FGSC_A4:1275402-1277175 | WT_5hasex | WT_veg | OK     | 52,6539  | 38,3008  | -0,459167     | 0,90528       | 0,365317   | 0,640245   | no  |
| AN7027 | ChrIV_A_nidulans_FGSC_A4:1267078-1268960 | WT_5hasex | WT_veg | OK     | 15,9502  | 21,7931  | 0,450299      | -0,789698     | 0,429704   | 0,696308   | no  |
| AN7028 | ChrIV_A_nidulans_FGSC_A4:1263256-1266246 | WT_5hasex | WT_veg | OK     | 27,9488  | 32,8672  | 0,23386       | -0,475489     | 0,634438   | 0,832812   | no  |
| AN7029 | ChrIV_A_nidulans_FGSC_A4:1259660-1261455 | WT_5hasex | WT_veg | OK     | 24,1146  | 46,151   | 0,936455      | -1,84047      | 0,0656988  | 0,215505   | no  |
| AN7031 | ChrIV_A_nidulans_FGSC_A4:1252185-1254423 | WT_5hasex | WT_veg | OK     | 61,0387  | 136,645  | 1,16264       | -2,42297      | 0,015394   | 0,07293    | no  |
| AN7033 | ChrIV_A_nidulans_FGSC_A4:1246083-1247524 | WT_5hasex | WT_veg | OK     | 288,033  | 354,167  | 0,298198      | -0,566766     | 0,570873   | 0,795614   | no  |
| AN7034 | ChrIV_A_nidulans_FGSC_A4:1244194-1245253 | WT_5hasex | WT_veg | OK     | 27,0006  | 48,3206  | 0,839646      | -1,57521      | 0,115208   | 0,31867    | no  |
| AN7035 | ChrIV_A_nidulans_FGSC_A4:1240694-1242035 | WT_5hasex | WT_veg | OK     | 99,7442  | 140,49   | 0,494168      | -1,01545      | 0,309893   | 0,586266   | no  |
| AN7037 | ChrIV_A_nidulans_FGSC_A4:1230768-1232828 | WT_5hasex | WT_veg | OK     | 63,7697  | 109,409  | 0,778792      | -1,62516      | 0,104129   | 0,297897   | no  |
| AN7038 | ChrIV_A_nidulans_FGSC_A4:1226318-1230484 | WT_5hasex | WT_veg | OK     | 53,4959  | 46,4936  | -0,202397     | 0,406579      | 0,684317   | 0,861078   | no  |
| AN7039 | ChrIV_A_nidulans_FGSC_A4:1226318-1230484 | WT_5hasex | WT_veg | OK     | 4,60771  | 2,47103  | -0,898936     | 1,19206       | 0,233239   | 0,498071   | no  |
| AN7040 | ChrIV_A_nidulans_FGSC_A4:1224816-1225465 | WT_5hasex | WT_veg | OK     | 111,874  | 202,909  | 0,858951      | -1,53         | 0,126016   | 0,338171   | no  |
| AN7041 | ChrIV_A_nidulans_FGSC_A4:1219145-1221611 | WT_5hasex | WT_veg | OK     | 181,388  | 341,303  | 0,911971      | -1,78492      | 0,0742743  | 0,234962   | no  |
| AN7042 | ChrIV_A_nidulans_FGSC_A4:1217117-1218401 | WT_5hasex | WT_veg | OK     | 92,9631  | 719,107  | 2,95148       | -5,65652      | 1,5448E-08 | 4,2853E-07 | yes |
| AN7043 | ChrIV_A_nidulans_FGSC_A4:1214980-1215688 | WT_5hasex | WT_veg | OK     | 18,5044  | 53,2877  | 1,52594       | -2,44807      | 0,0143624  | 0,0691742  | no  |
| AN7044 | ChrIV_A_nidulans_FGSC_A4:1212970-1214154 | WT_5hasex | WT_veg | OK     | 59,2757  | 114,612  | 0,951248      | -1,83226      | 0,0669124  | 0,218382   | no  |
| AN7047 | ChrIV_A_nidulans_FGSC_A4:1204086-1205534 | WT_5hasex | WT_veg | OK     | 46,8966  | 59,9066  | 0,353232      | -0,721092     | 0,470853   | 0,728523   | no  |
| AN7048 | ChrIV_A_nidulans_FGSC_A4:1202192-1203844 | WT_5hasex | WT_veg | OK     | 19,3923  | 43,3118  | 1,15928       | -2,21712      | 0,0266149  | 0,110637   | no  |
| AN7049 | ChrIV_A_nidulans_FGSC_A4:1198404-1201646 | WT_5hasex | WT_veg | OK     | 20,2813  | 29,1809  | 0,524875      | -1,06535      | 0,286718   | 0,560997   | no  |
| AN7052 | ChrIV_A_nidulans_FGSC_A4:1188680-1189700 | WT_5hasex | WT_veg | OK     | 29,2606  | 61,5617  | 1,07307       | -1,98722      | 0,0468976  | 0,169813   | no  |
| AN7053 | ChrIV_A_nidulans_FGSC_A4:1186736-1187625 | WT_5hasex | WT_veg | OK     | 68,4721  | 12,9287  | -2,40494      | 4,23017       | 2,3352E-05 | 0,00030592 | yes |
| AN7055 | ChrIV_A_nidulans_FGSC_A4:1181154-1182468 | WT_5hasex | WT_veg | NOTEST | 0        | 0        | 0             | 0             | 1          | 1          | no  |
| AN7056 | ChrIV_A_nidulans_FGSC_A4:1178548-1180588 | WT_5hasex | WT_veg | NOTEST | 0,108826 | 0        | -1.79769e+308 | -1.79769e+308 | 0,165569   | 1          | no  |
| AN7057 | ChrIV_A_nidulans_FGSC_A4:1176282-1177669 | WT_5hasex | WT_veg | NOTEST | 0        | 0        | 0             | 0             | 1          | 1          | no  |
| AN7058 | ChrIV_A_nidulans_FGSC_A4:1174560-1175713 | WT_5hasex | WT_veg | OK     | 10,0732  | 34,4938  | 1,77581       | -2,39304      | 0,0167094  | 0,0777445  | no  |
| AN7059 | ChrIV_A_nidulans_FGSC_A4:1162929-1163390 | WT_5hasex | WT_veg | OK     | 2,13396  | 6,82516  | 1,67733       | -1,5257       | 0,127086   | 0,340048   | no  |
| AN7060 | ChrIV_A_nidulans_FGSC_A4:1160113-1162497 | WT_5hasex | WT_veg | NOTEST | 0        | 0        | 0             | 0             | 1          | 1          | no  |
| AN7061 | ChrIV_A_nidulans_FGSC_A4:1154227-1156765 | WT_5hasex | WT_veg | NOTEST | 0,101977 | 0,706873 | 2,79321       | -1,35276      | 0,176131   | 1          | no  |
| AN7062 | ChrIV_A_nidulans_FGSC_A4:1152369-1154145 | WT_5hasex | WT_veg | NOTEST | 0,13709  | 0        | -1.79769e+308 | -1.79769e+308 | 0,224063   | 1          | no  |
| AN7063 | ChrIV_A_nidulans_FGSC_A4:1149508-1151518 | WT_5hasex | WT_veg | NOTEST | 0        | 0        | 0             | 0             | 1          | 1          | no  |

# Supplementary table 1

|        |                                          |           |        |        |           |           |               |               |            |                |
|--------|------------------------------------------|-----------|--------|--------|-----------|-----------|---------------|---------------|------------|----------------|
| AN7064 | ChrIV_A_nidulans_FGSC_A4:1147968-1148977 | WT_5hasex | WT_veg | NOTEST | 0         | 0         | 0             | 0             | 1          | 1 no           |
| AN7067 | ChrIV_A_nidulans_FGSC_A4:1139547-1141366 | WT_5hasex | WT_veg | NOTEST | 0         | 0         | 0             | 0             | 1          | 1 no           |
| AN7068 | ChrIV_A_nidulans_FGSC_A4:1136894-1138898 | WT_5hasex | WT_veg | NOTEST | 0,265107  | 0,912698  | 1,78356       | -1,26034      | 0,207546   | 1 no           |
| AN7070 | ChrIV_A_nidulans_FGSC_A4:1129967-1131258 | WT_5hasex | WT_veg | NOTEST | 0,663519  | 0         | -1.79769e+308 | -1.79769e+308 | 0,0537957  | 1 no           |
| AN7071 | ChrIV_A_nidulans_FGSC_A4:1123409-1129372 | WT_5hasex | WT_veg | NOTEST | 0,0951869 | 0,105933  | 0,154316      | -0,0953589    | 0,92403    | 1 no           |
| AN7072 | ChrIV_A_nidulans_FGSC_A4:1121944-1122955 | WT_5hasex | WT_veg | NOTEST | 1,4297    | 0         | -1.79769e+308 | -1.79769e+308 | 0,0315813  | 1 no           |
| AN7073 | ChrIV_A_nidulans_FGSC_A4:1119358-1120517 | WT_5hasex | WT_veg | NOTEST | 1,16528   | 1,30354   | 0,161757      | -0,124445     | 0,900963   | 1 no           |
| AN7074 | ChrIV_A_nidulans_FGSC_A4:1117930-1118991 | WT_5hasex | WT_veg | OK     | 37,5991   | 75,743    | 1,01042       | -1,96548      | 0,049359   | 0,176017 no    |
| AN7075 | ChrIV_A_nidulans_FGSC_A4:1115409-1117004 | WT_5hasex | WT_veg | NOTEST | 0,626777  | 0,417807  | -0,585115     | 0,371332      | 0,71039    | 1 no           |
| AN7076 | ChrIV_A_nidulans_FGSC_A4:1109033-1110779 | WT_5hasex | WT_veg | OK     | 8,55085   | 16,6065   | 0,957608      | -1,57953      | 0,114215   | 0,317034 no    |
| AN7078 | ChrIV_A_nidulans_FGSC_A4:1103515-1106169 | WT_5hasex | WT_veg | NOTEST | 0         | 0         | 0             | 0             | 1          | 1 no           |
| AN7080 | ChrIV_A_nidulans_FGSC_A4:1097284-1097835 | WT_5hasex | WT_veg | OK     | 8,51791   | 23,8802   | 1,48724       | -1,82479      | 0,0680323  | 0,22106 no     |
| AN7081 | ChrIV_A_nidulans_FGSC_A4:1093549-1095405 | WT_5hasex | WT_veg | OK     | 7,66936   | 4,98352   | -0,621941     | 0,969278      | 0,332406   | 0,608802 no    |
| AN7083 | ChrIV_A_nidulans_FGSC_A4:1087979-1088991 | WT_5hasex | WT_veg | OK     | 1,36372   | 5,33803   | 1,96876       | -1,8738       | 0,0609578  | 0,204495 no    |
| AN7084 | ChrIV_A_nidulans_FGSC_A4:1079493-1087114 | WT_5hasex | WT_veg | NOTEST | 1,08013   | 0,945758  | -0,191666     | 0,264723      | 0,791223   | 1 no           |
| AN7086 | ChrIV_A_nidulans_FGSC_A4:1073451-1074907 | WT_5hasex | WT_veg | OK     | 6,17408   | 6,99685   | 0,180482      | -0,272661     | 0,785114   | 0,912391 no    |
| AN7087 | ChrIV_A_nidulans_FGSC_A4:1069341-1070163 | WT_5hasex | WT_veg | NOTEST | 1,57627   | 1,02754   | -0,617322     | 0,411939      | 0,680384   | 1 no           |
| AN7088 | ChrIV_A_nidulans_FGSC_A4:1066220-1067945 | WT_5hasex | WT_veg | NOTEST | 0,235484  | 0,134921  | -0,803517     | 0,251576      | 0,801369   | 1 no           |
| AN7089 | ChrIV_A_nidulans_FGSC_A4:1063752-1066075 | WT_5hasex | WT_veg | NOTEST | 0,250222  | 0,0868333 | -1,52689      | 0,497657      | 0,618726   | 1 no           |
| AN7090 | ChrIV_A_nidulans_FGSC_A4:1056474-1057428 | WT_5hasex | WT_veg | OK     | 3,88472   | 5,19037   | 0,418027      | -0,494892     | 0,620676   | 0,824844 no    |
| AN7091 | ChrIV_A_nidulans_FGSC_A4:1053334-1056275 | WT_5hasex | WT_veg | OK     | 9,94143   | 20,334    | 1,03237       | -1,7996       | 0,0719245  | 0,229915 no    |
| AN7092 | ChrIV_A_nidulans_FGSC_A4:1050379-1052721 | WT_5hasex | WT_veg | OK     | 12,0844   | 23,3165   | 0,948211      | -1,58612      | 0,112712   | 0,314124 no    |
| AN7093 | ChrIV_A_nidulans_FGSC_A4:1044824-1046271 | WT_5hasex | WT_veg | OK     | 6,6249    | 34,3786   | 2,37554       | -3,59235      | 0,00032771 | 0,00303508 yes |
| AN7094 | ChrIV_A_nidulans_FGSC_A4:1043037-1044388 | WT_5hasex | WT_veg | NOTEST | 0,881327  | 2,74315   | 1,63809       | -1,53202      | 0,125517   | 1 no           |
| AN7097 | ChrIV_A_nidulans_FGSC_A4:1029074-1031494 | WT_5hasex | WT_veg | NOTEST | 0,10904   | 0         | -1.79769e+308 | -1.79769e+308 | 0,165569   | 1 no           |
| AN7098 | ChrIV_A_nidulans_FGSC_A4:1026876-1028457 | WT_5hasex | WT_veg | NOTEST | 0         | 0         | 0             | 0             | 1          | 1 no           |
| AN7099 | ChrIV_A_nidulans_FGSC_A4:1023403-1026140 | WT_5hasex | WT_veg | NOTEST | 0,735913  | 1,48676   | 1,01457       | -1,15938      | 0,246302   | 1 no           |
| AN7101 | ChrIV_A_nidulans_FGSC_A4:1016225-1017586 | WT_5hasex | WT_veg | OK     | 144,244   | 244,077   | 0,758828      | -1,57132      | 0,116108   | 0,320244 no    |
| AN7102 | ChrIV_A_nidulans_FGSC_A4:1014766-1015760 | WT_5hasex | WT_veg | OK     | 282,556   | 77,7483   | -1,86165      | 3,32905       | 0,00087142 | 0,0069951 yes  |
| AN7104 | ChrIV_A_nidulans_FGSC_A4:1004784-1008057 | WT_5hasex | WT_veg | OK     | 37,0973   | 60,7124   | 0,710677      | -1,48039      | 0,138769   | 0,360418 no    |
| AN7105 | ChrIV_A_nidulans_FGSC_A4:1000292-1003441 | WT_5hasex | WT_veg | OK     | 103,683   | 316,234   | 1,60881       | -3,16226      | 0,00156552 | 0,011386 yes   |
| AN7106 | ChrIV_A_nidulans_FGSC_A4:999335-1000192  | WT_5hasex | WT_veg | OK     | 17,3133   | 14,541    | -0,251754     | 0,40382       | 0,686345   | 0,861994 no    |
| AN7107 | ChrIV_A_nidulans_FGSC_A4:997319-999075   | WT_5hasex | WT_veg | OK     | 1037,47   | 2244,76   | 1,11349       | -1,86768      | 0,061807   | 0,206401 no    |
| AN7108 | ChrIV_A_nidulans_FGSC_A4:995641-996983   | WT_5hasex | WT_veg | OK     | 122,153   | 468,789   | 1,94025       | -3,97437      | 7,0566E-05 | 0,0008095 yes  |
| AN7109 | ChrIV_A_nidulans_FGSC_A4:992957-993596   | WT_5hasex | WT_veg | OK     | 18,2825   | 25,729    | 0,492936      | -0,775797     | 0,437869   | 0,702633 no    |
| AN7110 | ChrIV_A_nidulans_FGSC_A4:991251-991881   | WT_5hasex | WT_veg | OK     | 21,2588   | 13,1051   | -0,697934     | 1,03894       | 0,298834   | 0,574198 no    |
| AN7112 | ChrIV_A_nidulans_FGSC_A4:984711-986813   | WT_5hasex | WT_veg | NOTEST | 0         | 0         | 0             | 0             | 1          | 1 no           |
| AN7113 | ChrIV_A_nidulans_FGSC_A4:982371-984060   | WT_5hasex | WT_veg | NOTEST | 0,790349  | 1,54952   | 0,97126       | -0,947287     | 0,343493   | 1 no           |
| AN7115 | ChrIV_A_nidulans_FGSC_A4:973494-974865   | WT_5hasex | WT_veg | NOTEST | 1,3235    | 2,51752   | 0,92764       | -1,0123       | 0,311393   | 1 no           |
| AN7116 | ChrIV_A_nidulans_FGSC_A4:967369-967852   | WT_5hasex | WT_veg | NOTEST | 0         | 0         | 0             | 0             | 1          | 1 no           |
| AN7117 | ChrIV_A_nidulans_FGSC_A4:963428-964988   | WT_5hasex | WT_veg | NOTEST | 0         | 0         | 0             | 0             | 1          | 1 no           |
| AN7118 | ChrIV_A_nidulans_FGSC_A4:959853-962930   | WT_5hasex | WT_veg | NOTEST | 0,0764922 | 0,533375  | 2,80177       | -1,35691      | 0,17481    | 1 no           |
| AN7119 | ChrIV_A_nidulans_FGSC_A4:955246-956887   | WT_5hasex | WT_veg | NOTEST | 0,105714  | 0         | -1.79769e+308 | -1.79769e+308 | 0,165569   | 1 no           |
| AN7120 | ChrIV_A_nidulans_FGSC_A4:952711-954715   | WT_5hasex | WT_veg | NOTEST | 0         | 0         | 0             | 0             | 1          | 1 no           |
| AN7121 | ChrIV_A_nidulans_FGSC_A4:945462-947146   | WT_5hasex | WT_veg | NOTEST | 0         | 0,497622  | 1.79769e+308  | 1.79769e+308  | 0,123323   | 1 no           |
| AN7124 | ChrIV_A_nidulans_FGSC_A4:935193-935825   | WT_5hasex | WT_veg | OK     | 3,81866   | 17,5976   | 2,20424       | -2,79355      | 0,00521324 | 0,030764 yes   |
| AN7126 | ChrIV_A_nidulans_FGSC_A4:927660-930192   | WT_5hasex | WT_veg | NOTEST | 0,652258  | 1,40273   | 1,10472       | -1,18668      | 0,235355   | 1 no           |
| AN7128 | ChrIV_A_nidulans_FGSC_A4:922287-923115   | WT_5hasex | WT_veg | OK     | 4,71841   | 30,8601   | 2,70937       | -3,40772      | 0,00065509 | 0,00547499 yes |
| AN7129 | ChrIV_A_nidulans_FGSC_A4:909100-912154   | WT_5hasex | WT_veg | NOTEST | 1,90834   | 0,781606  | -1,2878       | 1,45714       | 0,145078   | 1 no           |
| AN7130 | ChrIV_A_nidulans_FGSC_A4:907467-908264   | WT_5hasex | WT_veg | OK     | 5,39322   | 1,42403   | -1,92117      | 1,51764       | 0,129105   | 0,343768 no    |
| AN7133 | ChrIV_A_nidulans_FGSC_A4:898898-900564   | WT_5hasex | WT_veg | OK     | 6,16576   | 6,44208   | 0,0632481     | -0,0809222    | 0,935504   | 0,975645 no    |
| AN7137 | ChrIV_A_nidulans_FGSC_A4:880495-882281   | WT_5hasex | WT_veg | OK     | 6,56761   | 4,37121   | -0,587336     | 0,852306      | 0,394044   | 0,667185 no    |
| AN7138 | ChrIV_A_nidulans_FGSC_A4:877523-879437   | WT_5hasex | WT_veg | OK     | 143,534   | 366,275   | 1,35153       | -2,75095      | 0,00594224 | 0,0342144 yes  |

## Supplementary table 1

|        |                                        |           |        |        |          |          |               |               |            |            |     |
|--------|----------------------------------------|-----------|--------|--------|----------|----------|---------------|---------------|------------|------------|-----|
| AN7139 | ChrIV_A_nidulans_FGSC_A4:875076-876869 | WT_5hasex | WT_veg | OK     | 249,011  | 936,525  | 1,91111       | -3,63538      | 0,00027757 | 0,00263929 | yes |
| AN7140 | ChrIV_A_nidulans_FGSC_A4:873731-875074 | WT_5hasex | WT_veg | OK     | 22,5513  | 22,6286  | 0,00493339    | -0,00800041   | 0,993617   | 0,997628   | no  |
| AN7141 | ChrIV_A_nidulans_FGSC_A4:871311-872865 | WT_5hasex | WT_veg | OK     | 114,442  | 93,2081  | -0,296093     | 0,57293       | 0,566692   | 0,793242   | no  |
| AN7143 | ChrIV_A_nidulans_FGSC_A4:867649-869175 | WT_5hasex | WT_veg | OK     | 111,927  | 333,897  | 1,57684       | -3,07984      | 0,00207111 | 0,0143863  | yes |
| AN7144 | ChrIV_A_nidulans_FGSC_A4:866868-867401 | WT_5hasex | WT_veg | OK     | 76,3123  | 206,389  | 1,43538       | -2,62742      | 0,00860362 | 0,0462365  | yes |
| AN7145 | ChrIV_A_nidulans_FGSC_A4:865146-866381 | WT_5hasex | WT_veg | OK     | 29,19    | 86,5393  | 1,56788       | -3,05124      | 0,00227896 | 0,0155639  | yes |
| AN7146 | ChrIV_A_nidulans_FGSC_A4:863024-864617 | WT_5hasex | WT_veg | OK     | 141,623  | 152,345  | 0,105287      | -0,213875     | 0,830645   | 0,93262    | no  |
| AN7147 | ChrIV_A_nidulans_FGSC_A4:861215-862519 | WT_5hasex | WT_veg | OK     | 1,45213  | 4,6677   | 1,68454       | -1,964        | 0,0495299  | 0,17643    | no  |
| AN7148 | ChrIV_A_nidulans_FGSC_A4:859166-860251 | WT_5hasex | WT_veg | OK     | 562,463  | 542,564  | -0,0519642    | 0,0910855     | 0,927425   | 0,972425   | no  |
| AN7149 | ChrIV_A_nidulans_FGSC_A4:857581-859129 | WT_5hasex | WT_veg | OK     | 58,8719  | 273,29   | 2,21478       | -4,31713      | 1,5807E-05 | 0,00021735 | yes |
| AN7150 | ChrIV_A_nidulans_FGSC_A4:853773-855593 | WT_5hasex | WT_veg | OK     | 16,4619  | 22,6618  | 0,461132      | -0,848074     | 0,396397   | 0,669472   | no  |
| AN7153 | ChrIV_A_nidulans_FGSC_A4:842618-844474 | WT_5hasex | WT_veg | NOTEST | 0,133552 | 0        | -1.79769e+308 | -1.79769e+308 | 0,224063   | 1          | no  |
| AN7154 | ChrIV_A_nidulans_FGSC_A4:839899-840785 | WT_5hasex | WT_veg | NOTEST | 0,225773 | 0        | -1.79769e+308 | -1.79769e+308 | 0,165569   | 1          | no  |
| AN7155 | ChrIV_A_nidulans_FGSC_A4:838294-838837 | WT_5hasex | WT_veg | NOTEST | 0        | 0        | 0             | 0             | 1          | 1          | no  |
| AN7156 | ChrIV_A_nidulans_FGSC_A4:835323-836607 | WT_5hasex | WT_veg | OK     | 2,62559  | 4,74543  | 0,853898      | -1,10437      | 0,269431   | 0,541263   | no  |
| AN7157 | ChrIV_A_nidulans_FGSC_A4:834082-834767 | WT_5hasex | WT_veg | OK     | 1,61441  | 5,32537  | 1,72188       | -1,55477      | 0,120001   | 0,327703   | no  |
| AN7158 | ChrIV_A_nidulans_FGSC_A4:830822-832398 | WT_5hasex | WT_veg | OK     | 278,969  | 948,37   | 1,76534       | -3,3536       | 0,00079768 | 0,00647708 | yes |
| AN7159 | ChrIV_A_nidulans_FGSC_A4:828895-830777 | WT_5hasex | WT_veg | OK     | 116,706  | 61,8117  | -0,916927     | 1,66148       | 0,0966169  | 0,282374   | no  |
| AN7160 | ChrIV_A_nidulans_FGSC_A4:825587-827014 | WT_5hasex | WT_veg | NOTEST | 0        | 0        | 0             | 0             | 1          | 1          | no  |
| AN7161 | ChrIV_A_nidulans_FGSC_A4:822785-824017 | WT_5hasex | WT_veg | NOTEST | 0,155946 | 0        | -1.79769e+308 | -1.79769e+308 | 0,165569   | 1          | no  |
| AN7162 | ChrIV_A_nidulans_FGSC_A4:818305-819177 | WT_5hasex | WT_veg | OK     | 12,061   | 79,9013  | 2,72787       | -4,09452      | 4,2305E-05 | 0,00051832 | yes |
| AN7164 | ChrIV_A_nidulans_FGSC_A4:811513-814211 | WT_5hasex | WT_veg | OK     | 4,292    | 21,3541  | 2,31479       | -3,29107      | 0,00099806 | 0,00783881 | yes |
| AN7165 | ChrIV_A_nidulans_FGSC_A4:808449-810991 | WT_5hasex | WT_veg | OK     | 40,9125  | 142,306  | 1,79838       | -3,6145       | 0,00030093 | 0,00282757 | yes |
| AN7166 | ChrIV_A_nidulans_FGSC_A4:806499-807449 | WT_5hasex | WT_veg | OK     | 2117,49  | 6984,52  | 1,7218        | -2,37982      | 0,0173213  | 0,0798726  | no  |
| AN7167 | ChrIV_A_nidulans_FGSC_A4:803240-804872 | WT_5hasex | WT_veg | NOTEST | 0,485443 | 0,771852 | 0,669022      | -0,510177     | 0,609927   | 1          | no  |
| AN7170 | ChrIV_A_nidulans_FGSC_A4:791887-793316 | WT_5hasex | WT_veg | OK     | 3202,87  | 9343,43  | 1,54459       | -1,65379      | 0,0981701  | 0,285573   | no  |
| AN7171 | ChrIV_A_nidulans_FGSC_A4:787081-787774 | WT_5hasex | WT_veg | NOTEST | 0,39073  | 1,72782  | 2,14471       | -0,902199     | 0,366951   | 1          | no  |
| AN7172 | ChrIV_A_nidulans_FGSC_A4:783358-786621 | WT_5hasex | WT_veg | OK     | 6,40565  | 29,168   | 2,18697       | -3,88471      | 0,00010245 | 0,00111918 | yes |
| AN7173 | ChrIV_A_nidulans_FGSC_A4:778930-781084 | WT_5hasex | WT_veg | OK     | 206,061  | 684,33   | 1,73162       | -3,30123      | 0,00096261 | 0,00760756 | yes |
| AN7174 | ChrIV_A_nidulans_FGSC_A4:775367-776878 | WT_5hasex | WT_veg | OK     | 23,8109  | 49,6838  | 1,06115       | -1,98974      | 0,0466199  | 0,169029   | no  |
| AN7175 | ChrIV_A_nidulans_FGSC_A4:770762-772266 | WT_5hasex | WT_veg | NOTEST | 0,399776 | 0,477513 | 0,256348      | -0,110091     | 0,912337   | 1          | no  |
| AN7176 | ChrIV_A_nidulans_FGSC_A4:769643-770403 | WT_5hasex | WT_veg | OK     | 1,26923  | 4,08312  | 1,68572       | -1,35031      | 0,176917   | 0,421781   | no  |
| AN7177 | ChrIV_A_nidulans_FGSC_A4:767808-768838 | WT_5hasex | WT_veg | OK     | 214,785  | 674,301  | 1,6505        | -3,36         | 0,00077942 | 0,00634898 | yes |
| AN7178 | ChrIV_A_nidulans_FGSC_A4:765428-766421 | WT_5hasex | WT_veg | NOTEST | 0        | 0        | 0             | 0             | 1          | 1          | no  |
| AN7179 | ChrIV_A_nidulans_FGSC_A4:763021-764220 | WT_5hasex | WT_veg | NOTEST | 0,250626 | 0        | -1.79769e+308 | -1.79769e+308 | 0,224063   | 1          | no  |
| AN7180 | ChrIV_A_nidulans_FGSC_A4:759368-760095 | WT_5hasex | WT_veg | OK     | 2,30551  | 2,59029  | 0,168032      | -0,136348     | 0,891546   | 0,958766   | no  |
| AN7181 | ChrIV_A_nidulans_FGSC_A4:757009-758509 | WT_5hasex | WT_veg | OK     | 146,045  | 217,034  | 0,571514      | -0,858102     | 0,390836   | 0,664028   | no  |
| AN7183 | ChrIV_A_nidulans_FGSC_A4:753001-754115 | WT_5hasex | WT_veg | OK     | 153,662  | 617,043  | 2,00561       | -3,841        | 0,00012254 | 0,00131176 | yes |
| AN7184 | ChrIV_A_nidulans_FGSC_A4:750820-752111 | WT_5hasex | WT_veg | OK     | 15,7052  | 46,8295  | 1,57618       | -2,75763      | 0,00582227 | 0,0336791  | yes |
| AN7185 | ChrIV_A_nidulans_FGSC_A4:747495-750077 | WT_5hasex | WT_veg | OK     | 109,237  | 230,731  | 1,07876       | -2,16994      | 0,0300114  | 0,121422   | no  |
| AN7186 | ChrIV_A_nidulans_FGSC_A4:744462-745369 | WT_5hasex | WT_veg | OK     | 4,76716  | 9,00777  | 0,918039      | -1,21571      | 0,224096   | 0,486062   | no  |
| AN7187 | ChrIV_A_nidulans_FGSC_A4:743129-744284 | WT_5hasex | WT_veg | OK     | 5,54925  | 11,6807  | 1,07377       | -1,51985      | 0,128548   | 0,342791   | no  |
| AN7188 | ChrIV_A_nidulans_FGSC_A4:739468-742330 | WT_5hasex | WT_veg | OK     | 18,8048  | 49,7408  | 1,40333       | -2,70939      | 0,00674067 | 0,0380056  | yes |
| AN7189 | ChrIV_A_nidulans_FGSC_A4:737159-739325 | WT_5hasex | WT_veg | OK     | 13,1801  | 10,7831  | -0,289583     | 0,53954       | 0,589514   | 0,806864   | no  |
| AN7190 | ChrIV_A_nidulans_FGSC_A4:733382-735312 | WT_5hasex | WT_veg | OK     | 13,0499  | 14,3868  | 0,140705      | -0,248216     | 0,803967   | 0,921125   | no  |
| AN7191 | ChrIV_A_nidulans_FGSC_A4:730546-732070 | WT_5hasex | WT_veg | NOTEST | 0,656069 | 1,36059  | 1,05231       | -0,803243     | 0,421834   | 1          | no  |
| AN7192 | ChrIV_A_nidulans_FGSC_A4:729036-730180 | WT_5hasex | WT_veg | OK     | 48,8926  | 84,5293  | 0,789835      | -1,54048      | 0,123444   | 0,33351    | no  |
| AN7193 | ChrIV_A_nidulans_FGSC_A4:724170-725466 | WT_5hasex | WT_veg | OK     | 145,982  | 229,01   | 0,649619      | -1,21331      | 0,225011   | 0,487252   | no  |
| AN7194 | ChrIV_A_nidulans_FGSC_A4:722919-724092 | WT_5hasex | WT_veg | OK     | 135,971  | 157,95   | 0,216177      | -0,416436     | 0,677091   | 0,856738   | no  |
| AN7199 | ChrIV_A_nidulans_FGSC_A4:703634-704901 | WT_5hasex | WT_veg | OK     | 35,638   | 53,0737  | 0,574582      | -1,0236       | 0,306026   | 0,582189   | no  |
| AN7200 | ChrIV_A_nidulans_FGSC_A4:700878-702590 | WT_5hasex | WT_veg | OK     | 0,606272 | 21,4411  | 5,14427       | -5,86902      | 4,3838E-09 | 1,3649E-07 | yes |
| AN7201 | ChrIV_A_nidulans_FGSC_A4:698180-700330 | WT_5hasex | WT_veg | NOTEST | 0,260671 | 1,00936  | 1,695314      | -1,61875      | 0,105501   | 1          | no  |
| AN7202 | ChrIV_A_nidulans_FGSC_A4:695825-696711 | WT_5hasex | WT_veg | NOTEST | 0,284061 | 0        | -1.79769e+308 | -1.79769e+308 | 0,23809    | 1          | no  |



# Supplementary table 1

|        |                                        |           |        |        |          |          |               |               |            |            |     |
|--------|----------------------------------------|-----------|--------|--------|----------|----------|---------------|---------------|------------|------------|-----|
| AN7203 | ChrIV_A_nidulans_FGSC_A4:692684-694948 | WT_5hasex | WT_veg | OK     | 3,83525  | 2,04158  | -0,909632     | 0,955359      | 0,339396   | 0,615314   | no  |
| AN7205 | ChrIV_A_nidulans_FGSC_A4:688812-690441 | WT_5hasex | WT_veg | OK     | 32,4184  | 150,305  | 2,21301       | -4,37338      | 1,2234E-05 | 0,00017187 | yes |
| AN7207 | ChrIV_A_nidulans_FGSC_A4:686344-688637 | WT_5hasex | WT_veg | NOTEST | 0        | 0,257074 | 1.79769e+308  | 1.79769e+308  | 0,446473   | 1          | no  |
| AN7208 | ChrIV_A_nidulans_FGSC_A4:680308-680875 | WT_5hasex | WT_veg | OK     | 104,71   | 69,75    | -0,586141     | 1,12994       | 0,258501   | 0,528468   | no  |
| AN7211 | ChrIV_A_nidulans_FGSC_A4:668299-669490 | WT_5hasex | WT_veg | OK     | 66,5686  | 26,4903  | -1,32938      | 2,6237        | 0,00869791 | 0,0466556  | yes |
| AN7212 | ChrIV_A_nidulans_FGSC_A4:666910-667376 | WT_5hasex | WT_veg | NOTEST | 0        | 0        | 0             | 0             | 1          | 1          | no  |
| AN7213 | ChrIV_A_nidulans_FGSC_A4:664761-666483 | WT_5hasex | WT_veg | NOTEST | 0        | 0        | 0             | 0             | 1          | 1          | no  |
| AN7214 | ChrIV_A_nidulans_FGSC_A4:661855-663287 | WT_5hasex | WT_veg | OK     | 69,2554  | 57,6609  | -0,264335     | 0,538198      | 0,590441   | 0,807328   | no  |
| AN7215 | ChrIV_A_nidulans_FGSC_A4:660243-660973 | WT_5hasex | WT_veg | OK     | 2,77362  | 4,95286  | 0,836492      | -0,737133     | 0,461041   | 0,720964   | no  |
| AN7217 | ChrIV_A_nidulans_FGSC_A4:648854-650426 | WT_5hasex | WT_veg | OK     | 638,58   | 658,217  | 0,0436971     | -0,08242      | 0,934313   | 0,97516    | no  |
| AN7218 | ChrIV_A_nidulans_FGSC_A4:643927-645142 | WT_5hasex | WT_veg | NOTEST | 0,629208 | 0,162698 | -1,95134      | 0,629108      | 0,529278   | 1          | no  |
| AN7219 | ChrIV_A_nidulans_FGSC_A4:642415-643791 | WT_5hasex | WT_veg | NOTEST | 0,50851  | 0        | -1.79769e+308 | -1.79769e+308 | 0,107729   | 1          | no  |
| AN7220 | ChrIV_A_nidulans_FGSC_A4:641374-642096 | WT_5hasex | WT_veg | OK     | 1,3031   | 4,36657  | 1,74456       | -1,58866      | 0,112137   | 0,313054   | no  |
| AN7221 | ChrIV_A_nidulans_FGSC_A4:637537-638398 | WT_5hasex | WT_veg | NOTEST | 0,708165 | 2,56885  | 1,85897       | -0,817728     | 0,413512   | 1          | no  |
| AN7222 | ChrIV_A_nidulans_FGSC_A4:630008-636437 | WT_5hasex | WT_veg | OK     | 24,2642  | 96,0689  | 1,98524       | -3,14223      | 0,00167668 | 0,0120523  | yes |
| AN7223 | ChrIV_A_nidulans_FGSC_A4:625795-627452 | WT_5hasex | WT_veg | OK     | 16,6868  | 16,844   | 0,0135258     | -0,0229913    | 0,981657   | 0,993423   | no  |
| AN7225 | ChrIV_A_nidulans_FGSC_A4:619554-621409 | WT_5hasex | WT_veg | OK     | 99,2809  | 22,311   | -2,15376      | 4,36286       | 1,2838E-05 | 0,00017934 | yes |
| AN7227 | ChrIV_A_nidulans_FGSC_A4:612868-614498 | WT_5hasex | WT_veg | OK     | 6,62153  | 5,04992  | -0,390905     | 0,554193      | 0,579447   | 0,800701   | no  |
| AN7228 | ChrIV_A_nidulans_FGSC_A4:610033-611919 | WT_5hasex | WT_veg | OK     | 28,7373  | 12,8075  | -1,16593      | 2,21081       | 0,0270491  | 0,111961   | no  |
| AN7229 | ChrIV_A_nidulans_FGSC_A4:605812-608665 | WT_5hasex | WT_veg | OK     | 18,7308  | 17,3436  | -0,111007     | 0,225437      | 0,821639   | 0,928701   | no  |
| AN7230 | ChrIV_A_nidulans_FGSC_A4:602001-604722 | WT_5hasex | WT_veg | NOTEST | 0,363965 | 0,569776 | 0,646596      | -0,54695      | 0,584413   | 1          | no  |
| AN7231 | ChrIV_A_nidulans_FGSC_A4:600144-601704 | WT_5hasex | WT_veg | OK     | 91,442   | 235,721  | 1,36615       | -2,39309      | 0,0167074  | 0,0777445  | no  |
| AN7232 | ChrIV_A_nidulans_FGSC_A4:595786-597055 | WT_5hasex | WT_veg | OK     | 9,26034  | 3,89687  | -1,24875      | 1,66838       | 0,0952394  | 0,279734   | no  |
| AN7233 | ChrIV_A_nidulans_FGSC_A4:592961-593997 | WT_5hasex | WT_veg | OK     | 37,865   | 8,50198  | -2,155        | 3,59152       | 0,00032875 | 0,00304151 | yes |
| AN7234 | ChrIV_A_nidulans_FGSC_A4:590432-591116 | WT_5hasex | WT_veg | NOTEST | 0,706349 | 1,25736  | 0,831948      | -0,487931     | 0,625599   | 1          | no  |
| AN7235 | ChrIV_A_nidulans_FGSC_A4:587648-588870 | WT_5hasex | WT_veg | NOTEST | 0        | 0        | 0             | 0             | 1          | 1          | no  |
| AN7236 | ChrIV_A_nidulans_FGSC_A4:585841-586480 | WT_5hasex | WT_veg | NOTEST | 0        | 0        | 0             | 0             | 1          | 1          | no  |
| AN7237 | ChrIV_A_nidulans_FGSC_A4:582580-584421 | WT_5hasex | WT_veg | NOTEST | 0,457453 | 0        | -1.79769e+308 | -1.79769e+308 | 0,0717459  | 1          | no  |
| AN7238 | ChrIV_A_nidulans_FGSC_A4:580785-581863 | WT_5hasex | WT_veg | NOTEST | 0,182051 | 0        | -1.79769e+308 | -1.79769e+308 | 0,165569   | 1          | no  |
| AN7239 | ChrIV_A_nidulans_FGSC_A4:578381-579655 | WT_5hasex | WT_veg | OK     | 2,80661  | 5,64899  | 1,00916       | -1,26543      | 0,205718   | 0,462285   | no  |
| AN7240 | ChrIV_A_nidulans_FGSC_A4:576572-578078 | WT_5hasex | WT_veg | NOTEST | 1,07933  | 2,81412  | 1,38256       | -1,40959      | 0,158662   | 1          | no  |
| AN7241 | ChrIV_A_nidulans_FGSC_A4:573782-575957 | WT_5hasex | WT_veg | NOTEST | 0        | 0        | 0             | 0             | 1          | 1          | no  |
| AN7242 | ChrIV_A_nidulans_FGSC_A4:571152-572847 | WT_5hasex | WT_veg | NOTEST | 1,96529  | 3,45187  | 0,812632      | -1,01827      | 0,308552   | 1          | no  |
| AN7243 | ChrIV_A_nidulans_FGSC_A4:568369-570473 | WT_5hasex | WT_veg | OK     | 3,48583  | 2,88546  | -0,272701     | 0,360978      | 0,718116   | 0,879161   | no  |
| AN7244 | ChrIV_A_nidulans_FGSC_A4:567001-567412 | WT_5hasex | WT_veg | NOTEST | 0,793248 | 0        | -1.79769e+308 | -1.79769e+308 | 0,224063   | 1          | no  |
| AN7245 | ChrIV_A_nidulans_FGSC_A4:565175-566651 | WT_5hasex | WT_veg | NOTEST | 1,45906  | 0,99771  | -0,548345     | 0,464742      | 0,642116   | 1          | no  |
| AN7246 | ChrIV_A_nidulans_FGSC_A4:557458-564702 | WT_5hasex | WT_veg | OK     | 3,41272  | 3,18872  | -0,0979428    | 0,159257      | 0,873466   | 0,951568   | no  |
| AN7247 | ChrIV_A_nidulans_FGSC_A4:554421-555337 | WT_5hasex | WT_veg | OK     | 10,5347  | 12,6274  | 0,261413      | -0,37532      | 0,707422   | 0,873667   | no  |
| AN7248 | ChrIV_A_nidulans_FGSC_A4:544884-547816 | WT_5hasex | WT_veg | OK     | 8,54662  | 40,7011  | 2,25164       | -4,16961      | 3,0512E-05 | 0,00038921 | yes |
| AN7251 | ChrIV_A_nidulans_FGSC_A4:530811-532753 | WT_5hasex | WT_veg | OK     | 6,40642  | 3,47223  | -0,883657     | 1,22218       | 0,221638   | 0,483204   | no  |
| AN7252 | ChrIV_A_nidulans_FGSC_A4:526908-528748 | WT_5hasex | WT_veg | OK     | 16,0078  | 45,7669  | 1,51553       | -2,8204       | 0,00479634 | 0,0287784  | yes |
| AN7253 | ChrIV_A_nidulans_FGSC_A4:523615-524248 | WT_5hasex | WT_veg | OK     | 9,34407  | 19,4146  | 1,05502       | -1,53358      | 0,125133   | 0,336544   | no  |
| AN7254 | ChrIV_A_nidulans_FGSC_A4:520306-523398 | WT_5hasex | WT_veg | OK     | 241,069  | 490,686  | 1,02535       | -1,90354      | 0,0569702  | 0,194663   | no  |
| AN7255 | ChrIV_A_nidulans_FGSC_A4:518840-519545 | WT_5hasex | WT_veg | OK     | 18,3191  | 35,6331  | 0,959872      | -1,57179      | 0,115998   | 0,320061   | no  |
| AN7256 | ChrIV_A_nidulans_FGSC_A4:517452-518659 | WT_5hasex | WT_veg | OK     | 27,2991  | 48,5319  | 0,830077      | -1,49325      | 0,135371   | 0,354669   | no  |
| AN7257 | ChrIV_A_nidulans_FGSC_A4:515952-516903 | WT_5hasex | WT_veg | OK     | 6,93669  | 20,8629  | 1,58862       | -2,37325      | 0,0176322  | 0,0808603  | no  |
| AN7258 | ChrIV_A_nidulans_FGSC_A4:513717-515387 | WT_5hasex | WT_veg | OK     | 144,114  | 234,473  | 0,702211      | -1,39544      | 0,162883   | 0,399467   | no  |
| AN7259 | ChrIV_A_nidulans_FGSC_A4:511873-513478 | WT_5hasex | WT_veg | OK     | 112,123  | 254,434  | 1,18221       | -2,43648      | 0,0148309  | 0,0709194  | no  |
| AN7260 | ChrIV_A_nidulans_FGSC_A4:509275-511336 | WT_5hasex | WT_veg | OK     | 9,22572  | 63,1114  | 2,77417       | -4,93857      | 7,8698E-07 | 1,4856E-05 | yes |
| AN7261 | ChrIV_A_nidulans_FGSC_A4:505552-508602 | WT_5hasex | WT_veg | NOTEST | 0,560482 | 0,726942 | 0,375174      | -0,369939     | 0,711428   | 1          | no  |
| AN7262 | ChrIV_A_nidulans_FGSC_A4:499792-504603 | WT_5hasex | WT_veg | OK     | 32,3087  | 44,4868  | 0,461457      | -0,900669     | 0,367764   | 0,642575   | no  |
| AN7263 | ChrIV_A_nidulans_FGSC_A4:495897-496749 | WT_5hasex | WT_veg | OK     | 42,5327  | 82,0815  | 0,948484      | -1,5557       | 0,11978    | 0,327355   | no  |
| AN7264 | ChrIV_A_nidulans_FGSC_A4:489843-491030 | WT_5hasex | WT_veg | OK     | 36,3898  | 106,383  | 1,54766       | -2,5455       | 0,0109122  | 0,0557872  | no  |

## Supplementary table 1

|        |                                        |           |        |        |          |          |               |               |            |            |     |
|--------|----------------------------------------|-----------|--------|--------|----------|----------|---------------|---------------|------------|------------|-----|
| AN7265 | ChrIV_A_nidulans_FGSC_A4:488659-489559 | WT_5hasex | WT_veg | OK     | 23,6458  | 70,5364  | 1,57678       | -2,27768      | 0,0227455  | 0,0981317  | no  |
| AN7266 | ChrIV_A_nidulans_FGSC_A4:486819-487309 | WT_5hasex | WT_veg | OK     | 83,8798  | 204,041  | 1,28246       | -2,02063      | 0,0433183  | 0,159981   | no  |
| AN7267 | ChrIV_A_nidulans_FGSC_A4:485028-486678 | WT_5hasex | WT_veg | OK     | 7,06031  | 9,38921  | 0,411272      | -0,569452     | 0,569049   | 0,794658   | no  |
| AN7268 | ChrIV_A_nidulans_FGSC_A4:482367-484824 | WT_5hasex | WT_veg | OK     | 35,0098  | 40,1302  | 0,196931      | -0,299812     | 0,764321   | 0,902888   | no  |
| AN7269 | ChrIV_A_nidulans_FGSC_A4:482367-484824 | WT_5hasex | WT_veg | OK     | 36,2494  | 68,298   | 0,913886      | -1,4592       | 0,144511   | 0,370193   | no  |
| AN7270 | ChrIV_A_nidulans_FGSC_A4:480493-481307 | WT_5hasex | WT_veg | OK     | 17,4947  | 23,5511  | 0,42888       | -0,56909      | 0,569295   | 0,79472    | no  |
| AN7271 | ChrIV_A_nidulans_FGSC_A4:477990-479274 | WT_5hasex | WT_veg | OK     | 8,10969  | 7,09988  | -0,191852     | 0,288203      | 0,773192   | 0,907004   | no  |
| AN7272 | ChrIV_A_nidulans_FGSC_A4:475192-477794 | WT_5hasex | WT_veg | NOTEST | 0,776695 | 0,595957 | -0,38214      | 0,299901      | 0,764253   | 1          | no  |
| AN7273 | ChrIV_A_nidulans_FGSC_A4:472156-472936 | WT_5hasex | WT_veg | OK     | 34,1603  | 42,201   | 0,304959      | -0,558402     | 0,57657    | 0,798893   | no  |
| AN7274 | ChrIV_A_nidulans_FGSC_A4:466585-468191 | WT_5hasex | WT_veg | OK     | 19,532   | 19,9137  | 0,0279246     | -0,0524315    | 0,958185   | 0,984468   | no  |
| AN7275 | ChrIV_A_nidulans_FGSC_A4:458667-460218 | WT_5hasex | WT_veg | NOTEST | 0,435866 | 0        | -1.79769e+308 | -1.79769e+308 | 0,0908325  | 1          | no  |
| AN7278 | ChrIV_A_nidulans_FGSC_A4:440157-441951 | WT_5hasex | WT_veg | OK     | 100,501  | 21,9712  | -2,19352      | 4,39358       | 0,00001115 | 0,00015826 | yes |
| AN7279 | ChrIV_A_nidulans_FGSC_A4:437760-439097 | WT_5hasex | WT_veg | NOTEST | 1,7035   | 1,02748  | -0,729401     | 0,600224      | 0,548357   | 1          | no  |
| AN7280 | ChrIV_A_nidulans_FGSC_A4:425978-432176 | WT_5hasex | WT_veg | NOTEST | 0,135342 | 0,621608 | 2,19939       | -2,12519      | 0,0335707  | 1          | no  |
| AN7281 | ChrIV_A_nidulans_FGSC_A4:423979-424446 | WT_5hasex | WT_veg | NOTEST | 0        | 0        | 0             | 0             | 1          | 1          | no  |
| AN7282 | ChrIV_A_nidulans_FGSC_A4:421674-423499 | WT_5hasex | WT_veg | NOTEST | 0,647618 | 0,121072 | -2,41928      | 0,795737      | 0,426185   | 1          | no  |
| AN7283 | ChrIV_A_nidulans_FGSC_A4:419012-419584 | WT_5hasex | WT_veg | OK     | 34,1757  | 85,8637  | 1,32908       | -2,20747      | 0,027281   | 0,112707   | no  |
| AN7285 | ChrIV_A_nidulans_FGSC_A4:413218-414702 | WT_5hasex | WT_veg | OK     | 25,8384  | 33,5206  | 0,375529      | -0,733875     | 0,463025   | 0,722375   | no  |
| AN7286 | ChrIV_A_nidulans_FGSC_A4:411854-413120 | WT_5hasex | WT_veg | OK     | 5,43615  | 14,7804  | 1,44302       | -2,13452      | 0,0328005  | 0,129974   | no  |
| AN7288 | ChrIV_A_nidulans_FGSC_A4:404585-406644 | WT_5hasex | WT_veg | OK     | 3,5824   | 0,796094 | -2,16992      | 2,16291       | 0,030548   | 0,123033   | no  |
| AN7289 | ChrIV_A_nidulans_FGSC_A4:401440-402888 | WT_5hasex | WT_veg | OK     | 159,759  | 271,052  | 0,762675      | -1,55584      | 0,119747   | 0,327325   | no  |
| AN7290 | ChrIV_A_nidulans_FGSC_A4:401007-401334 | WT_5hasex | WT_veg | OK     | 34,9321  | 53,7303  | 0,621182      | -0,94798      | 0,343139   | 0,618548   | no  |
| AN7291 | ChrIV_A_nidulans_FGSC_A4:399475-400576 | WT_5hasex | WT_veg | OK     | 26,6726  | 58,2993  | 1,12812       | -2,107        | 0,0351178  | 0,136862   | no  |
| AN7292 | ChrIV_A_nidulans_FGSC_A4:397594-399064 | WT_5hasex | WT_veg | OK     | 9,06023  | 27,5255  | 1,60315       | -2,47605      | 0,0132846  | 0,0651757  | no  |
| AN7293 | ChrIV_A_nidulans_FGSC_A4:396000-397514 | WT_5hasex | WT_veg | OK     | 40,9306  | 200,611  | 2,29315       | -4,63012      | 3,6545E-06 | 5,8413E-05 | yes |
| AN7294 | ChrIV_A_nidulans_FGSC_A4:391813-393801 | WT_5hasex | WT_veg | OK     | 37,7655  | 57,9992  | 0,618966      | -1,27054      | 0,203891   | 0,459954   | no  |
| AN7295 | ChrIV_A_nidulans_FGSC_A4:388511-390311 | WT_5hasex | WT_veg | OK     | 156,909  | 318,383  | 1,02084       | -1,5902       | 0,111789   | 0,312442   | no  |
| AN7297 | ChrIV_A_nidulans_FGSC_A4:379394-382357 | WT_5hasex | WT_veg | OK     | 27,471   | 46,0234  | 0,744459      | -1,54488      | 0,122376   | 0,331923   | no  |
| AN7298 | ChrIV_A_nidulans_FGSC_A4:377208-378417 | WT_5hasex | WT_veg | OK     | 59,7742  | 85,5346  | 0,516985      | -1,0463       | 0,295422   | 0,570359   | no  |
| AN7299 | ChrIV_A_nidulans_FGSC_A4:374507-376442 | WT_5hasex | WT_veg | OK     | 210,068  | 251,038  | 0,257054      | -0,514383     | 0,606984   | 0,817431   | no  |
| AN7300 | ChrIV_A_nidulans_FGSC_A4:369108-371767 | WT_5hasex | WT_veg | OK     | 11,528   | 23,4019  | 1,02148       | -1,95743      | 0,0502969  | 0,178298   | no  |
| AN7302 | ChrIV_A_nidulans_FGSC_A4:363988-365732 | WT_5hasex | WT_veg | OK     | 46,5895  | 39,8955  | -0,223778     | 0,443695      | 0,657263   | 0,845573   | no  |
| AN7303 | ChrIV_A_nidulans_FGSC_A4:358225-361513 | WT_5hasex | WT_veg | OK     | 10,6236  | 27,597   | 1,37724       | -2,67033      | 0,00757777 | 0,0417594  | yes |
| AN7304 | ChrIV_A_nidulans_FGSC_A4:355734-357255 | WT_5hasex | WT_veg | OK     | 35,2218  | 92,4268  | 1,39184       | -2,82425      | 0,0047392  | 0,0285026  | yes |
| AN7305 | ChrIV_A_nidulans_FGSC_A4:354052-355372 | WT_5hasex | WT_veg | OK     | 30,7089  | 82,5274  | 1,42622       | -2,77969      | 0,00544111 | 0,0318291  | yes |
| AN7307 | ChrIV_A_nidulans_FGSC_A4:347845-349585 | WT_5hasex | WT_veg | OK     | 12,486   | 17,8304  | 0,514033      | -0,866797     | 0,386053   | 0,659773   | no  |
| AN7308 | ChrIV_A_nidulans_FGSC_A4:345700-347439 | WT_5hasex | WT_veg | OK     | 17,3466  | 28,8759  | 0,735218      | -1,34388      | 0,178987   | 0,424593   | no  |
| AN7310 | ChrIV_A_nidulans_FGSC_A4:342205-345524 | WT_5hasex | WT_veg | OK     | 24,6119  | 47,9671  | 0,962692      | -1,8144       | 0,0696163  | 0,224591   | no  |
| AN7311 | ChrIV_A_nidulans_FGSC_A4:339252-341846 | WT_5hasex | WT_veg | OK     | 24,7946  | 32,8599  | 0,406302      | -0,823795     | 0,410056   | 0,680061   | no  |
| AN7313 | ChrIV_A_nidulans_FGSC_A4:333331-334959 | WT_5hasex | WT_veg | NOTEST | 1,24302  | 2,94084  | 1,24238       | -1,30352      | 0,192399   | 1          | no  |
| AN7314 | ChrIV_A_nidulans_FGSC_A4:329343-332649 | WT_5hasex | WT_veg | OK     | 18,4823  | 25,8222  | 0,482468      | -0,98386      | 0,325184   | 0,601864   | no  |
| AN7315 | ChrIV_A_nidulans_FGSC_A4:324522-326053 | WT_5hasex | WT_veg | OK     | 16,1113  | 24,2375  | 0,589165      | -1,06253      | 0,287995   | 0,562434   | no  |
| AN7316 | ChrIV_A_nidulans_FGSC_A4:322992-324008 | WT_5hasex | WT_veg | OK     | 13,4361  | 41,408   | 1,62379       | -2,40887      | 0,0160018  | 0,0752046  | no  |
| AN7317 | ChrIV_A_nidulans_FGSC_A4:320864-321880 | WT_5hasex | WT_veg | NOTEST | 0,343743 | 0        | -1.79769e+308 | -1.79769e+308 | 0,224063   | 1          | no  |
| AN7318 | ChrIV_A_nidulans_FGSC_A4:319472-320127 | WT_5hasex | WT_veg | NOTEST | 0        | 0        | 0             | 0             | 1          | 1          | no  |
| AN7319 | ChrIV_A_nidulans_FGSC_A4:315161-316819 | WT_5hasex | WT_veg | NOTEST | 0,292433 | 0        | -1.79769e+308 | -1.79769e+308 | 0,165569   | 1          | no  |
| AN7320 | ChrIV_A_nidulans_FGSC_A4:312971-314539 | WT_5hasex | WT_veg | OK     | 3,88204  | 4,82192  | 0,312793      | -0,426436     | 0,66979    | 0,852295   | no  |
| AN7321 | ChrIV_A_nidulans_FGSC_A4:309882-312381 | WT_5hasex | WT_veg | OK     | 23,6999  | 55,9099  | 1,23822       | -2,52705      | 0,0115025  | 0,0582021  | no  |
| AN7322 | ChrIV_A_nidulans_FGSC_A4:307281-308274 | WT_5hasex | WT_veg | NOTEST | 1,327    | 3,86447  | 1,54211       | -1,41922      | 0,155836   | 1          | no  |
| AN7323 | ChrIV_A_nidulans_FGSC_A4:305782-306522 | WT_5hasex | WT_veg | OK     | 6,08953  | 2,34176  | -1,37874      | 1,26794       | 0,204821   | 0,461198   | no  |
| AN7324 | ChrIV_A_nidulans_FGSC_A4:303873-305090 | WT_5hasex | WT_veg | OK     | 45,9877  | 53,4209  | 0,216156      | -0,410157     | 0,681691   | 0,859498   | no  |
| AN7325 | ChrIV_A_nidulans_FGSC_A4:300045-303443 | WT_5hasex | WT_veg | OK     | 21,2537  | 38,3485  | 0,851457      | -1,73027      | 0,0835822  | 0,255625   | no  |
| AN7326 | ChrIV_A_nidulans_FGSC_A4:297625-299758 | WT_5hasex | WT_veg | OK     | 11,6193  | 32,078   | 1,46507       | -2,5258       | 0,0115434  | 0,0583509  | no  |

## Supplementary table 1

|        |                                        |           |        |        |          |          |               |               |            |            |     |
|--------|----------------------------------------|-----------|--------|--------|----------|----------|---------------|---------------|------------|------------|-----|
| AN7327 | ChrIV_A_nidulans_FGSC_A4:295200-295978 | WT_5hasex | WT_veg | OK     | 1,84322  | 8,64665  | 2,22991       | -2,52537      | 0,0115577  | 0,0583981  | no  |
| AN7328 | ChrIV_A_nidulans_FGSC_A4:292827-293481 | WT_5hasex | WT_veg | OK     | 22,9268  | 44,1696  | 0,946022      | -1,54171      | 0,123143   | 0,333193   | no  |
| AN7329 | ChrIV_A_nidulans_FGSC_A4:288846-291507 | WT_5hasex | WT_veg | OK     | 2228,38  | 2745,27  | 0,300949      | -0,410442     | 0,681482   | 0,859409   | no  |
| AN7330 | ChrIV_A_nidulans_FGSC_A4:288846-291507 | WT_5hasex | WT_veg | OK     | 8,53197  | 9,02771  | 0,0814814     | -0,116355     | 0,907371   | 0,964583   | no  |
| AN7331 | ChrIV_A_nidulans_FGSC_A4:287920-288464 | WT_5hasex | WT_veg | OK     | 135,202  | 297,341  | 1,137         | -2,01879      | 0,0435087  | 0,160458   | no  |
| AN7332 | ChrIV_A_nidulans_FGSC_A4:284406-286847 | WT_5hasex | WT_veg | OK     | 15,4699  | 4,53317  | -1,77088      | 3,21261       | 0,00131536 | 0,00984398 | yes |
| AN7333 | ChrIV_A_nidulans_FGSC_A4:281426-283027 | WT_5hasex | WT_veg | NOTEST | 0,858317 | 0        | -1.79769e+308 | -1.79769e+308 | 0,0687549  | 1          | no  |
| AN7334 | ChrIV_A_nidulans_FGSC_A4:274454-278164 | WT_5hasex | WT_veg | OK     | 45,2523  | 154,42   | 1,7708        | -3,66782      | 0,00024462 | 0,00237033 | yes |
| AN7335 | ChrIV_A_nidulans_FGSC_A4:270160-272302 | WT_5hasex | WT_veg | OK     | 133,083  | 205,577  | 0,627354      | -1,2479       | 0,212068   | 0,470948   | no  |
| AN7336 | ChrIV_A_nidulans_FGSC_A4:267852-268314 | WT_5hasex | WT_veg | OK     | 103,56   | 327,608  | 1,66151       | -3,07106      | 0,00213298 | 0,0147379  | yes |
| AN7338 | ChrIV_A_nidulans_FGSC_A4:261154-262458 | WT_5hasex | WT_veg | OK     | 8,34494  | 24,4559  | 1,55121       | -2,49524      | 0,0125872  | 0,0624791  | no  |
| AN7339 | ChrIV_A_nidulans_FGSC_A4:259768-260848 | WT_5hasex | WT_veg | OK     | 2,86922  | 2,15561  | -0,412566     | 0,426869      | 0,669475   | 0,852142   | no  |
| AN7340 | ChrIV_A_nidulans_FGSC_A4:257825-259600 | WT_5hasex | WT_veg | OK     | 9,06136  | 13,5502  | 0,580511      | -0,924195     | 0,355385   | 0,630878   | no  |
| AN7341 | ChrIV_A_nidulans_FGSC_A4:255159-257102 | WT_5hasex | WT_veg | OK     | 239,718  | 791,941  | 1,72406       | -3,33867      | 0,00084181 | 0,00678657 | yes |
| AN7342 | ChrIV_A_nidulans_FGSC_A4:246931-253021 | WT_5hasex | WT_veg | OK     | 8,78084  | 15,4061  | 0,811075      | -1,66168      | 0,0965772  | 0,282325   | no  |
| AN7343 | ChrIV_A_nidulans_FGSC_A4:243355-245330 | WT_5hasex | WT_veg | OK     | 4,43688  | 6,04915  | 0,447186      | -0,670077     | 0,502809   | 0,751819   | no  |
| AN7344 | ChrIV_A_nidulans_FGSC_A4:241211-242915 | WT_5hasex | WT_veg | OK     | 3,64427  | 11,1158  | 1,60891       | -2,38415      | 0,0171184  | 0,0791807  | no  |
| AN7346 | ChrIV_A_nidulans_FGSC_A4:235746-237595 | WT_5hasex | WT_veg | OK     | 3,14773  | 1,82209  | -0,788719     | 0,950488      | 0,341865   | 0,61744    | no  |
| AN7347 | ChrIV_A_nidulans_FGSC_A4:232194-233185 | WT_5hasex | WT_veg | OK     | 19,4116  | 40,0771  | 1,04585       | -1,77646      | 0,0756566  | 0,238283   | no  |
| AN7348 | ChrIV_A_nidulans_FGSC_A4:221562-231126 | WT_5hasex | WT_veg | OK     | 10,2274  | 30,6672  | 1,58425       | -3,33135      | 0,00086425 | 0,00694817 | yes |
| AN7350 | ChrIV_A_nidulans_FGSC_A4:215002-217031 | WT_5hasex | WT_veg | OK     | 33,693   | 98,3544  | 1,54554       | -3,13285      | 0,00173116 | 0,0123827  | yes |
| AN7351 | ChrIV_A_nidulans_FGSC_A4:210748-212641 | WT_5hasex | WT_veg | OK     | 30,1251  | 40,6501  | 0,432296      | -0,817228     | 0,413798   | 0,682978   | no  |
| AN7352 | ChrIV_A_nidulans_FGSC_A4:209414-210604 | WT_5hasex | WT_veg | OK     | 11,7261  | 20,2498  | 0,788185      | -1,28393      | 0,199167   | 0,453199   | no  |
| AN7353 | ChrIV_A_nidulans_FGSC_A4:205944-207336 | WT_5hasex | WT_veg | OK     | 20,9347  | 28,7796  | 0,459151      | -0,833693     | 0,404454   | 0,675551   | no  |
| AN7354 | ChrIV_A_nidulans_FGSC_A4:204598-205725 | WT_5hasex | WT_veg | OK     | 1664,66  | 2396,82  | 0,5259        | -0,868804     | 0,384954   | 0,658862   | no  |
| AN7356 | ChrIV_A_nidulans_FGSC_A4:199122-199693 | WT_5hasex | WT_veg | OK     | 25,206   | 53,2773  | 1,07975       | -1,70485      | 0,0882217  | 0,26543    | no  |
| AN7357 | ChrIV_A_nidulans_FGSC_A4:198051-198999 | WT_5hasex | WT_veg | OK     | 29,2723  | 705,244  | 4,59052       | -8,58821      | 0          | 0          | yes |
| AN7358 | ChrIV_A_nidulans_FGSC_A4:194393-196442 | WT_5hasex | WT_veg | OK     | 10,5343  | 33,3656  | 1,66327       | -2,98185      | 0,00286515 | 0,018791   | yes |
| AN7360 | ChrIV_A_nidulans_FGSC_A4:189108-190693 | WT_5hasex | WT_veg | OK     | 26,4608  | 80,0642  | 1,5973        | -3,08592      | 0,00202926 | 0,0141462  | yes |
| AN7361 | ChrIV_A_nidulans_FGSC_A4:186645-188682 | WT_5hasex | WT_veg | OK     | 18,4013  | 34,9221  | 0,924331      | -1,77209      | 0,0763795  | 0,239909   | no  |
| AN7362 | ChrIV_A_nidulans_FGSC_A4:181220-184431 | WT_5hasex | WT_veg | OK     | 15,0566  | 32,023   | 1,08872       | -1,93626      | 0,0528361  | 0,184421   | no  |
| AN7363 | ChrIV_A_nidulans_FGSC_A4:178186-180846 | WT_5hasex | WT_veg | OK     | 6,62733  | 8,15168  | 0,298671      | -0,476198     | 0,633933   | 0,832587   | no  |
| AN7364 | ChrIV_A_nidulans_FGSC_A4:173418-174759 | WT_5hasex | WT_veg | OK     | 13,4534  | 53,0052  | 1,97816       | -3,47268      | 0,00051528 | 0,0044662  | yes |
| AN7365 | ChrIV_A_nidulans_FGSC_A4:172365-173290 | WT_5hasex | WT_veg | OK     | 40,2432  | 169,217  | 2,07206       | -3,97965      | 6,9017E-05 | 0,00079434 | yes |
| AN7366 | ChrIV_A_nidulans_FGSC_A4:170347-171746 | WT_5hasex | WT_veg | OK     | 4,21416  | 8,31272  | 0,980075      | -1,34492      | 0,17865    | 0,424116   | no  |
| AN7367 | ChrIV_A_nidulans_FGSC_A4:167614-168753 | WT_5hasex | WT_veg | OK     | 43,1073  | 66,3593  | 0,622367      | -1,23129      | 0,218213   | 0,478765   | no  |
| AN7368 | ChrIV_A_nidulans_FGSC_A4:164651-166331 | WT_5hasex | WT_veg | NOTEST | 0,418116 | 0,501482 | 0,262295      | -0,159115     | 0,873578   | 1          | no  |
| AN7370 | ChrIV_A_nidulans_FGSC_A4:156886-159206 | WT_5hasex | WT_veg | OK     | 4,13169  | 11,6995  | 1,50164       | -1,9632       | 0,0496225  | 0,176668   | no  |
| AN7371 | ChrIV_A_nidulans_FGSC_A4:154601-155852 | WT_5hasex | WT_veg | OK     | 2,16199  | 5,6207   | 1,37839       | -1,45861      | 0,144672   | 0,370407   | no  |
| AN7373 | ChrIV_A_nidulans_FGSC_A4:145917-148195 | WT_5hasex | WT_veg | OK     | 6,87911  | 7,59634  | 0,143083      | -0,197776     | 0,843221   | 0,937859   | no  |
| AN7374 | ChrIV_A_nidulans_FGSC_A4:145048-145858 | WT_5hasex | WT_veg | OK     | 77,6492  | 226,318  | 1,54331       | -3,153        | 0,001616   | 0,0116947  | yes |
| AN7375 | ChrIV_A_nidulans_FGSC_A4:142803-144764 | WT_5hasex | WT_veg | OK     | 71,7035  | 80,481   | 0,166605      | -0,346363     | 0,72907    | 0,885311   | no  |
| AN7376 | ChrIV_A_nidulans_FGSC_A4:141488-142785 | WT_5hasex | WT_veg | OK     | 3,25191  | 10,9417  | 1,75048       | -2,40045      | 0,016375   | 0,0765393  | no  |
| AN7377 | ChrIV_A_nidulans_FGSC_A4:139886-141016 | WT_5hasex | WT_veg | NOTEST | 0,678726 | 0        | -1.79769e+308 | -1.79769e+308 | 0,0908325  | 1          | no  |
| AN7378 | ChrIV_A_nidulans_FGSC_A4:137120-137829 | WT_5hasex | WT_veg | OK     | 34,5352  | 7,90144  | -2,12788      | 3,06127       | 0,00220401 | 0,0151576  | yes |
| AN7379 | ChrIV_A_nidulans_FGSC_A4:134493-136722 | WT_5hasex | WT_veg | NOTEST | 0,372327 | 0        | -1.79769e+308 | -1.79769e+308 | 0,0573914  | 1          | no  |
| AN7380 | ChrIV_A_nidulans_FGSC_A4:132316-134165 | WT_5hasex | WT_veg | NOTEST | 0,331389 | 0        | -1.79769e+308 | -1.79769e+308 | 0,107729   | 1          | no  |
| AN7382 | ChrIV_A_nidulans_FGSC_A4:126025-127405 | WT_5hasex | WT_veg | OK     | 16,2166  | 14,8167  | -0,130241     | 0,228406      | 0,81933    | 0,927648   | no  |
| AN7383 | ChrIV_A_nidulans_FGSC_A4:124284-125802 | WT_5hasex | WT_veg | NOTEST | 0,386322 | 0        | -1.79769e+308 | -1.79769e+308 | 0,0653486  | 1          | no  |
| AN7384 | ChrIV_A_nidulans_FGSC_A4:120805-121574 | WT_5hasex | WT_veg | NOTEST | 0        | 0        | 0             | 0             | 1          | 1          | no  |
| AN7385 | ChrIV_A_nidulans_FGSC_A4:119375-120596 | WT_5hasex | WT_veg | OK     | 21,549   | 16,4094  | -0,3931       | 0,608441      | 0,542895   | 0,777565   | no  |
| AN7386 | ChrIV_A_nidulans_FGSC_A4:116255-117358 | WT_5hasex | WT_veg | OK     | 550,617  | 191,283  | -1,52534      | 2,26154       | 0,0237255  | 0,101334   | no  |
| AN7389 | ChrIV_A_nidulans_FGSC_A4:107862-109659 | WT_5hasex | WT_veg | OK     | 6,95038  | 3,52936  | -0,977686     | 1,28846       | 0,197586   | 0,451228   | no  |

## Supplementary table 1

|        |                                          |           |        |        |          |          |               |               |            |            |     |
|--------|------------------------------------------|-----------|--------|--------|----------|----------|---------------|---------------|------------|------------|-----|
| AN7390 | ChrIV_A_nidulans_FGSC_A4:102557-104331   | WT_5hasex | WT_veg | OK     | 24,9995  | 78,85    | 1,65721       | -3,28188      | 0,00103117 | 0,00806256 | yes |
| AN7391 | ChrIV_A_nidulans_FGSC_A4:100633-102376   | WT_5hasex | WT_veg | OK     | 12,484   | 20,9282  | 0,74537       | -1,20086      | 0,229804   | 0,49327    | no  |
| AN7392 | ChrIV_A_nidulans_FGSC_A4:98553-100322    | WT_5hasex | WT_veg | OK     | 44,719   | 34,4068  | -0,378194     | 0,679157      | 0,497038   | 0,747612   | no  |
| AN7393 | ChrIV_A_nidulans_FGSC_A4:97539-98260     | WT_5hasex | WT_veg | NOTEST | 0        | 0        | 0             | 0             | 1          | 1          | no  |
| AN7394 | ChrIV_A_nidulans_FGSC_A4:94444-95861     | WT_5hasex | WT_veg | NOTEST | 0        | 0        | 0             | 0             | 1          | 1          | no  |
| AN7395 | ChrIV_A_nidulans_FGSC_A4:92872-94207     | WT_5hasex | WT_veg | OK     | 9,94845  | 0,172859 | -5,8468       | 1,9729        | 0,0485067  | 0,173906   | no  |
| AN7397 | ChrIV_A_nidulans_FGSC_A4:79909-82639     | WT_5hasex | WT_veg | OK     | 4,59195  | 0,873969 | -2,39345      | 2,80998       | 0,00495449 | 0,0295129  | yes |
| AN7398 | ChrIV_A_nidulans_FGSC_A4:76922-77983     | WT_5hasex | WT_veg | NOTEST | 0,36813  | 1,71636  | 2,22106       | -1,14626      | 0,251686   | 1          | no  |
| AN7400 | ChrIV_A_nidulans_FGSC_A4:70645-72358     | WT_5hasex | WT_veg | OK     | 68,6557  | 30,1625  | -1,18662      | 2,21101       | 0,027035   | 0,111911   | no  |
| AN7403 | ChrIV_A_nidulans_FGSC_A4:60742-61907     | WT_5hasex | WT_veg | OK     | 4,33624  | 5,73674  | 0,403786      | -0,537957     | 0,590607   | 0,807328   | no  |
| AN7404 | ChrIV_A_nidulans_FGSC_A4:59181-60164     | WT_5hasex | WT_veg | NOTEST | 0,827383 | 2,0251   | 1,29136       | -1,069        | 0,285071   | 1          | no  |
| AN7405 | ChrIV_A_nidulans_FGSC_A4:55605-56831     | WT_5hasex | WT_veg | NOTEST | 0        | 0        | 0             | 0             | 1          | 1          | no  |
| AN7406 | ChrIV_A_nidulans_FGSC_A4:53758-55111     | WT_5hasex | WT_veg | OK     | 3,00669  | 1,78234  | -0,75441      | 0,733487      | 0,463261   | 0,72261    | no  |
| AN7407 | ChrIV_A_nidulans_FGSC_A4:51363-53463     | WT_5hasex | WT_veg | NOTEST | 1,7609   | 2,80026  | 0,669249      | -0,781431     | 0,434549   | 1          | no  |
| AN7408 | ChrIV_A_nidulans_FGSC_A4:48411-50078     | WT_5hasex | WT_veg | NOTEST | 0,16397  | 0        | -1.79769e+308 | -1.79769e+308 | 0,224063   | 1          | no  |
| AN7409 | ChrIV_A_nidulans_FGSC_A4:46069-46570     | WT_5hasex | WT_veg | OK     | 5,13506  | 1,78754  | -1,5224       | 1,06486       | 0,28694    | 0,561179   | no  |
| AN7410 | ChrIV_A_nidulans_FGSC_A4:42547-44593     | WT_5hasex | WT_veg | NOTEST | 0,808532 | 0        | -1.79769e+308 | -1.79769e+308 | 0,0908325  | 1          | no  |
| AN7411 | ChrIV_A_nidulans_FGSC_A4:41002-41755     | WT_5hasex | WT_veg | NOTEST | 0,246876 | 0,238738 | -0,0483616    | 0,0148137     | 0,988181   | 1          | no  |
| AN7412 | ChrIV_A_nidulans_FGSC_A4:39748-40173     | WT_5hasex | WT_veg | NOTEST | 0        | 0        | 0             | 0             | 1          | 1          | no  |
| AN7414 | ChrIV_A_nidulans_FGSC_A4:34794-35961     | WT_5hasex | WT_veg | NOTEST | 0,917033 | 0,531383 | -0,787221     | 0,510667      | 0,609584   | 1          | no  |
| AN7415 | ChrIV_A_nidulans_FGSC_A4:27989-30266     | WT_5hasex | WT_veg | NOTEST | 0        | 0        | 0             | 0             | 1          | 1          | no  |
| AN7416 | ChrIV_A_nidulans_FGSC_A4:24757-25255     | WT_5hasex | WT_veg | NOTEST | 0,386066 | 0        | -1.79769e+308 | -1.79769e+308 | 0,165569   | 1          | no  |
| AN7417 | ChrIV_A_nidulans_FGSC_A4:20915-22063     | WT_5hasex | WT_veg | NOTEST | 0        | 0        | 0             | 0             | 1          | 1          | no  |
| AN7418 | ChrIV_A_nidulans_FGSC_A4:15946-18239     | WT_5hasex | WT_veg | NOTEST | 0,367678 | 0        | -1.79769e+308 | -1.79769e+308 | 0,0341325  | 1          | no  |
| AN7419 | ChrIV_A_nidulans_FGSC_A4:14427-15668     | WT_5hasex | WT_veg | NOTEST | 0,147252 | 0        | -1.79769e+308 | -1.79769e+308 | 0,165569   | 1          | no  |
| AN7420 | ChrIV_A_nidulans_FGSC_A4:8986-9589       | WT_5hasex | WT_veg | NOTEST | 0        | 0        | 0             | 0             | 1          | 1          | no  |
| AN7422 | ChrIV_A_nidulans_FGSC_A4:1501165-1503893 | WT_5hasex | WT_veg | OK     | 63,7376  | 84,2794  | 0,403036      | -0,832082     | 0,405362   | 0,676445   | no  |
| AN7423 | ChrIV_A_nidulans_FGSC_A4:1504209-1506675 | WT_5hasex | WT_veg | OK     | 87,1664  | 168,858  | 0,95397       | -1,95546      | 0,0505288  | 0,17887    | no  |
| AN7424 | ChrIV_A_nidulans_FGSC_A4:1507093-1508811 | WT_5hasex | WT_veg | OK     | 59,7676  | 201,24   | 1,75148       | -3,56872      | 0,00035873 | 0,00327605 | yes |
| AN7425 | ChrIV_A_nidulans_FGSC_A4:1509169-1510281 | WT_5hasex | WT_veg | OK     | 22,2605  | 42,1189  | 0,91998       | -1,61024      | 0,107346   | 0,304403   | no  |
| AN7426 | ChrIV_A_nidulans_FGSC_A4:1511146-1512311 | WT_5hasex | WT_veg | OK     | 63,9663  | 72,2515  | 0,175715      | -0,353011     | 0,72408    | 0,882586   | no  |
| AN7428 | ChrIV_A_nidulans_FGSC_A4:1514375-1518102 | WT_5hasex | WT_veg | OK     | 75,5015  | 97,287   | 0,365742      | -0,75411      | 0,450783   | 0,712849   | no  |
| AN7429 | ChrIV_A_nidulans_FGSC_A4:1518962-1520343 | WT_5hasex | WT_veg | OK     | 21,6955  | 92,17    | 2,0869        | -3,89568      | 9,7925E-05 | 0,00107623 | yes |
| AN7431 | ChrIV_A_nidulans_FGSC_A4:1523715-1525770 | WT_5hasex | WT_veg | OK     | 13,9102  | 13,4398  | -0,0496352    | 0,0917674     | 0,926883   | 0,972363   | no  |
| AN7432 | ChrIV_A_nidulans_FGSC_A4:1526229-1527264 | WT_5hasex | WT_veg | OK     | 158,179  | 305,288  | 0,94861       | -1,97141      | 0,0486771  | 0,174392   | no  |
| AN7433 | ChrIV_A_nidulans_FGSC_A4:1528673-1530781 | WT_5hasex | WT_veg | OK     | 16,2161  | 24,6767  | 0,60572       | -1,15197      | 0,249334   | 0,517469   | no  |
| AN7434 | ChrIV_A_nidulans_FGSC_A4:1532014-1534033 | WT_5hasex | WT_veg | OK     | 16,1871  | 32,4337  | 1,00264       | -1,91001      | 0,0561318  | 0,192602   | no  |
| AN7435 | ChrIV_A_nidulans_FGSC_A4:1534519-1535970 | WT_5hasex | WT_veg | OK     | 30,0618  | 71,8702  | 1,25746       | -2,40839      | 0,0160232  | 0,0752754  | no  |
| AN7437 | ChrIV_A_nidulans_FGSC_A4:1539195-1541019 | WT_5hasex | WT_veg | OK     | 60,5886  | 81,4048  | 0,426067      | -0,821933     | 0,411115   | 0,68108    | no  |
| AN7438 | ChrIV_A_nidulans_FGSC_A4:1542265-1545626 | WT_5hasex | WT_veg | OK     | 20,6015  | 46,8292  | 1,18466       | -2,41858      | 0,0155812  | 0,073597   | no  |
| AN7439 | ChrIV_A_nidulans_FGSC_A4:1546025-1548435 | WT_5hasex | WT_veg | OK     | 20,5845  | 19,2906  | -0,0936582    | 0,189197      | 0,849939   | 0,941019   | no  |
| AN7440 | ChrIV_A_nidulans_FGSC_A4:1548747-1550193 | WT_5hasex | WT_veg | OK     | 42,0251  | 96,9747  | 1,20636       | -2,46378      | 0,0137481  | 0,0668299  | no  |
| AN7441 | ChrIV_A_nidulans_FGSC_A4:1550295-1552466 | WT_5hasex | WT_veg | OK     | 55,2331  | 129,795  | 1,23263       | -2,56167      | 0,0104172  | 0,0538078  | no  |
| AN7442 | ChrIV_A_nidulans_FGSC_A4:1552633-1553813 | WT_5hasex | WT_veg | OK     | 16,0199  | 48,8029  | 1,6071        | -2,82039      | 0,00479651 | 0,0287784  | yes |
| AN7443 | ChrIV_A_nidulans_FGSC_A4:1555393-1558406 | WT_5hasex | WT_veg | OK     | 145,905  | 209,782  | 0,52386       | -0,98554      | 0,324359   | 0,6009     | no  |
| AN7444 | ChrIV_A_nidulans_FGSC_A4:1559076-1561311 | WT_5hasex | WT_veg | OK     | 26,0541  | 42,6427  | 0,710787      | -1,37062      | 0,170494   | 0,411696   | no  |
| AN7447 | ChrIV_A_nidulans_FGSC_A4:1565644-1568671 | WT_5hasex | WT_veg | OK     | 18,1932  | 31,4309  | 0,788789      | -1,60775      | 0,107889   | 0,305468   | no  |
| AN7449 | ChrIV_A_nidulans_FGSC_A4:1577252-1578137 | WT_5hasex | WT_veg | OK     | 69,7383  | 134,206  | 0,944425      | -1,89383      | 0,058247   | 0,197842   | no  |
| AN7450 | ChrIV_A_nidulans_FGSC_A4:1578373-1580849 | WT_5hasex | WT_veg | OK     | 13,3482  | 24,7486  | 0,890703      | -1,70969      | 0,0873241  | 0,263638   | no  |
| AN7451 | ChrIV_A_nidulans_FGSC_A4:1581046-1584683 | WT_5hasex | WT_veg | OK     | 72,2029  | 233,04   | 1,69045       | -3,41609      | 0,00063528 | 0,00533666 | yes |
| AN7452 | ChrIV_A_nidulans_FGSC_A4:1586467-1588507 | WT_5hasex | WT_veg | NOTEST | 0        | 0,994573 | 1.79769e+308  | 1.79769e+308  | 0,188032   | 1          | no  |
| AN7453 | ChrIV_A_nidulans_FGSC_A4:1592271-1593219 | WT_5hasex | WT_veg | OK     | 24,9312  | 25,7822  | 0,0484247     | -0,0854689    | 0,931889   | 0,974174   | no  |
| AN7454 | ChrIV_A_nidulans_FGSC_A4:1594068-1596058 | WT_5hasex | WT_veg | OK     | 103,279  | 69,4391  | -0,572733     | 1,0335        | 0,301369   | 0,577036   | no  |

## Supplementary table 1

|        |                                          |           |        |        |          |          |               |               |            |            |     |
|--------|------------------------------------------|-----------|--------|--------|----------|----------|---------------|---------------|------------|------------|-----|
| AN7455 | ChrIV_A_nidulans_FGSC_A4:1597207-1601490 | WT_5hasex | WT_veg | OK     | 2,58402  | 6,30585  | 1,28708       | -2,10378      | 0,0353975  | 0,137706   | no  |
| AN7456 | ChrIV_A_nidulans_FGSC_A4:1602411-1603170 | WT_5hasex | WT_veg | OK     | 255,328  | 442,382  | 0,792944      | -1,63995      | 0,101015   | 0,291549   | no  |
| AN7457 | ChrIV_A_nidulans_FGSC_A4:1604354-1605651 | WT_5hasex | WT_veg | OK     | 18,5267  | 49,9808  | 1,43177       | -2,54892      | 0,0108058  | 0,0553838  | no  |
| AN7458 | ChrIV_A_nidulans_FGSC_A4:1606047-1607967 | WT_5hasex | WT_veg | OK     | 18,4263  | 125,937  | 2,77286       | -5,22963      | 1,6985E-07 | 3,7413E-06 | yes |
| AN7460 | ChrIV_A_nidulans_FGSC_A4:1610653-1611335 | WT_5hasex | WT_veg | OK     | 81,4727  | 347,985  | 2,09464       | -3,89107      | 9,9803E-05 | 0,00109412 | yes |
| AN7461 | ChrIV_A_nidulans_FGSC_A4:1611488-1612772 | WT_5hasex | WT_veg | OK     | 37,7043  | 97,2491  | 1,36695       | -2,72904      | 0,00635182 | 0,0362146  | yes |
| AN7462 | ChrIV_A_nidulans_FGSC_A4:1613145-1615660 | WT_5hasex | WT_veg | OK     | 45,6442  | 44,4112  | -0,0395078    | 0,0814011     | 0,935123   | 0,9755     | no  |
| AN7465 | ChrIV_A_nidulans_FGSC_A4:1626960-1629033 | WT_5hasex | WT_veg | OK     | 87,9945  | 159,488  | 0,857958      | -1,75913      | 0,0785562  | 0,244696   | no  |
| AN7466 | ChrIV_A_nidulans_FGSC_A4:1629679-1631446 | WT_5hasex | WT_veg | OK     | 43,177   | 88,865   | 1,04135       | -2,08939      | 0,0366726  | 0,141469   | no  |
| AN7467 | ChrIV_A_nidulans_FGSC_A4:1631978-1632909 | WT_5hasex | WT_veg | OK     | 8,85603  | 35,8136  | 2,01577       | -2,72279      | 0,00647326 | 0,0367749  | yes |
| AN7469 | ChrIV_A_nidulans_FGSC_A4:1637021-1637804 | WT_5hasex | WT_veg | OK     | 204,773  | 237,536  | 0,214119      | -0,430927     | 0,666522   | 0,850925   | no  |
| AN7470 | ChrIV_A_nidulans_FGSC_A4:1638053-1642224 | WT_5hasex | WT_veg | OK     | 265,657  | 1107,8   | 2,06007       | -3,83054      | 0,00012786 | 0,00136047 | yes |
| AN7471 | ChrIV_A_nidulans_FGSC_A4:1638053-1642224 | WT_5hasex | WT_veg | OK     | 30,1175  | 28,1652  | -0,0966886    | 0,192403      | 0,847426   | 0,939787   | no  |
| AN7472 | ChrIV_A_nidulans_FGSC_A4:1642505-1644140 | WT_5hasex | WT_veg | OK     | 34,1628  | 16,0204  | -1,09252      | 2,18594       | 0,0288202  | 0,117522   | no  |
| AN7474 | ChrIV_A_nidulans_FGSC_A4:1648485-1652147 | WT_5hasex | WT_veg | OK     | 29,1643  | 76,3819  | 1,38903       | -2,92354      | 0,00346078 | 0,0220542  | yes |
| AN7475 | ChrIV_A_nidulans_FGSC_A4:1654647-1656943 | WT_5hasex | WT_veg | OK     | 11,7878  | 27,7132  | 1,23327       | -2,33641      | 0,0194697  | 0,0872683  | no  |
| AN7476 | ChrIV_A_nidulans_FGSC_A4:1658607-1660880 | WT_5hasex | WT_veg | OK     | 162,22   | 403,176  | 1,31346       | -2,13143      | 0,0330538  | 0,130753   | no  |
| AN7477 | ChrIV_A_nidulans_FGSC_A4:1662219-1663094 | WT_5hasex | WT_veg | OK     | 26,7717  | 47,0445  | 0,813318      | -1,42615      | 0,153825   | 0,385383   | no  |
| AN7478 | ChrIV_A_nidulans_FGSC_A4:1665693-1666752 | WT_5hasex | WT_veg | OK     | 10,5796  | 34,674   | 1,71257       | -2,39842      | 0,0164661  | 0,0768555  | no  |
| AN7479 | ChrIV_A_nidulans_FGSC_A4:1667488-1669572 | WT_5hasex | WT_veg | OK     | 84,7719  | 117,042  | 0,465363      | -0,960241     | 0,336934   | 0,61295    | no  |
| AN7480 | ChrIV_A_nidulans_FGSC_A4:1671657-1674150 | WT_5hasex | WT_veg | OK     | 35,64    | 32,9138  | -0,114806     | 0,231678      | 0,816788   | 0,926659   | no  |
| AN7481 | ChrIV_A_nidulans_FGSC_A4:1674994-1676702 | WT_5hasex | WT_veg | OK     | 9,7357   | 28,4269  | 1,5459        | -2,65061      | 0,00803457 | 0,0437613  | yes |
| AN7482 | ChrIV_A_nidulans_FGSC_A4:1678533-1679427 | WT_5hasex | WT_veg | OK     | 78,3514  | 108,102  | 0,464359      | -0,916399     | 0,359458   | 0,634155   | no  |
| AN7483 | ChrIV_A_nidulans_FGSC_A4:1689927-1691752 | WT_5hasex | WT_veg | OK     | 23,8823  | 28,2926  | 0,244482      | -0,484115     | 0,628304   | 0,829163   | no  |
| AN7484 | ChrIV_A_nidulans_FGSC_A4:1692536-1693280 | WT_5hasex | WT_veg | OK     | 358,154  | 200,396  | -0,837724     | 1,64404       | 0,100168   | 0,289713   | no  |
| AN7488 | ChrIV_A_nidulans_FGSC_A4:1701621-1703076 | WT_5hasex | WT_veg | OK     | 10,6486  | 14,2933  | 0,424675      | -0,704653     | 0,481026   | 0,735855   | no  |
| AN7489 | ChrIV_A_nidulans_FGSC_A4:1703510-1705316 | WT_5hasex | WT_veg | OK     | 18,2778  | 19,1664  | 0,0684817     | -0,123393     | 0,901796   | 0,962187   | no  |
| AN7490 | ChrIV_A_nidulans_FGSC_A4:1705598-1707239 | WT_5hasex | WT_veg | OK     | 1,16729  | 3,94304  | 1,75615       | -2,17848      | 0,0293705  | 0,11936    | no  |
| AN7491 | ChrIV_A_nidulans_FGSC_A4:1707390-1708201 | WT_5hasex | WT_veg | OK     | 90,2196  | 177,047  | 0,972616      | -1,97754      | 0,0479809  | 0,172662   | no  |
| AN7492 | ChrIV_A_nidulans_FGSC_A4:1708512-1709650 | WT_5hasex | WT_veg | OK     | 48,0724  | 39,4261  | -0,286057     | 0,569037      | 0,569331   | 0,794749   | no  |
| AN7493 | ChrIV_A_nidulans_FGSC_A4:1709849-1710911 | WT_5hasex | WT_veg | OK     | 19,1745  | 37,2308  | 0,957305      | -1,65461      | 0,0980029  | 0,285166   | no  |
| AN7496 | ChrIV_A_nidulans_FGSC_A4:1719603-1724350 | WT_5hasex | WT_veg | OK     | 30,0021  | 52,0804  | 0,795676      | -1,66288      | 0,096336   | 0,281948   | no  |
| AN7497 | ChrIV_A_nidulans_FGSC_A4:1725786-1726565 | WT_5hasex | WT_veg | OK     | 448,693  | 909,21   | 1,01888       | -1,98481      | 0,0471653  | 0,170476   | no  |
| AN7498 | ChrIV_A_nidulans_FGSC_A4:1727532-1729235 | WT_5hasex | WT_veg | OK     | 35,789   | 70,8757  | 0,985773      | -1,78185      | 0,0747732  | 0,23604    | no  |
| AN7499 | ChrIV_A_nidulans_FGSC_A4:1729550-1735082 | WT_5hasex | WT_veg | OK     | 9,70024  | 15,5305  | 0,679013      | -1,373        | 0,169753   | 0,410437   | no  |
| AN7501 | ChrIV_A_nidulans_FGSC_A4:1739702-1741048 | WT_5hasex | WT_veg | OK     | 169      | 837,973  | 2,30988       | -4,74933      | 2,0409E-06 | 3,4996E-05 | yes |
| AN7502 | ChrIV_A_nidulans_FGSC_A4:1741577-1743414 | WT_5hasex | WT_veg | OK     | 14,2255  | 18,5584  | 0,383589      | -0,667193     | 0,504649   | 0,752807   | no  |
| AN7503 | ChrIV_A_nidulans_FGSC_A4:1743613-1746122 | WT_5hasex | WT_veg | OK     | 19,0734  | 62,7301  | 1,7176        | -3,48569      | 0,00049088 | 0,00428215 | yes |
| AN7504 | ChrIV_A_nidulans_FGSC_A4:1746975-1750521 | WT_5hasex | WT_veg | OK     | 28,6518  | 13,6825  | -1,0663       | 1,91028       | 0,0560977  | 0,192523   | no  |
| AN7506 | ChrIV_A_nidulans_FGSC_A4:1754575-1760143 | WT_5hasex | WT_veg | OK     | 9,87474  | 11,1139  | 0,170553      | -0,336839     | 0,736238   | 0,889003   | no  |
| AN7507 | ChrIV_A_nidulans_FGSC_A4:1761955-1764455 | WT_5hasex | WT_veg | OK     | 27,4425  | 19,35    | -0,504075     | 1,00704       | 0,313916   | 0,589981   | no  |
| AN7508 | ChrIV_A_nidulans_FGSC_A4:1768401-1771326 | WT_5hasex | WT_veg | NOTEST | 1,52359  | 2,9411   | 0,948879      | -1,29342      | 0,195866   | 1          | no  |
| AN7509 | ChrIV_A_nidulans_FGSC_A4:1773351-1774395 | WT_5hasex | WT_veg | NOTEST | 0,388987 | 0,431695 | 0,150291      | -0,0764903    | 0,939029   | 1          | no  |
| AN7510 | ChrIV_A_nidulans_FGSC_A4:1775520-1777732 | WT_5hasex | WT_veg | OK     | 27,5464  | 48,3011  | 0,810194      | -1,60228      | 0,109094   | 0,307683   | no  |
| AN7515 | ChrIV_A_nidulans_FGSC_A4:1802651-1803464 | WT_5hasex | WT_veg | OK     | 38,9968  | 86,3937  | 1,14757       | -1,79571      | 0,07254    | 0,231205   | no  |
| AN7516 | ChrIV_A_nidulans_FGSC_A4:1803884-1805799 | WT_5hasex | WT_veg | OK     | 10,7158  | 17,9204  | 0,741865      | -1,28452      | 0,19896    | 0,452946   | no  |
| AN7517 | ChrIV_A_nidulans_FGSC_A4:1806781-1808535 | WT_5hasex | WT_veg | OK     | 130,227  | 419,962  | 1,68923       | -3,2667       | 0,00108809 | 0,0084222  | yes |
| AN7518 | ChrIV_A_nidulans_FGSC_A4:1809016-1811236 | WT_5hasex | WT_veg | OK     | 2,09155  | 1,51688  | -0,463461     | 0,523342      | 0,600736   | 0,813641   | no  |
| AN7519 | ChrIV_A_nidulans_FGSC_A4:1811611-1813699 | WT_5hasex | WT_veg | NOTEST | 0,316919 | 0        | -1.79769e+308 | -1.79769e+308 | 0,0703913  | 1          | no  |
| AN7521 | ChrIV_A_nidulans_FGSC_A4:1816345-1818028 | WT_5hasex | WT_veg | OK     | 77,5662  | 0,482759 | -7,32798      | 5,28667       | 1,2456E-07 | 2,8281E-06 | yes |
| AN7523 | ChrIV_A_nidulans_FGSC_A4:1822501-1824057 | WT_5hasex | WT_veg | OK     | 4,6746   | 12,1679  | 1,38017       | -1,61209      | 0,106943   | 0,303578   | no  |
| AN7524 | ChrIV_A_nidulans_FGSC_A4:1831427-1834453 | WT_5hasex | WT_veg | OK     | 40,4451  | 135,554  | 1,74483       | -3,37941      | 0,00072641 | 0,00598042 | yes |
| AN7525 | ChrIV_A_nidulans_FGSC_A4:1834551-1835734 | WT_5hasex | WT_veg | OK     | 30,6769  | 55,569   | 0,85713       | -1,61611      | 0,106071   | 0,301919   | no  |

## Supplementary table 1

|        |                                          |           |        |        |          |          |              |              |            |            |     |
|--------|------------------------------------------|-----------|--------|--------|----------|----------|--------------|--------------|------------|------------|-----|
| AN7526 | ChrIV_A_nidulans_FGSC_A4:1835962-1837965 | WT_5hasex | WT_veg | OK     | 14,0285  | 137,068  | 3,28846      | -6,08115     | 1,1932E-09 | 4,1519E-08 | yes |
| AN7528 | ChrIV_A_nidulans_FGSC_A4:1842495-1843405 | WT_5hasex | WT_veg | OK     | 7,55567  | 4,55704  | -0,729463    | 0,905687     | 0,365101   | 0,639953   | no  |
| AN7529 | ChrIV_A_nidulans_FGSC_A4:1844078-1845398 | WT_5hasex | WT_veg | OK     | 5,99658  | 13,4536  | -1,16578     | -1,4723      | 0,14094    | 0,36409    | no  |
| AN7530 | ChrIV_A_nidulans_FGSC_A4:1850389-1851228 | WT_5hasex | WT_veg | OK     | 27,9492  | 130,725  | 2,22566      | -4,08307     | 4,4444E-05 | 0,00054087 | yes |
| AN7531 | ChrIV_A_nidulans_FGSC_A4:1856900-1858029 | WT_5hasex | WT_veg | NOTEST | 0,612716 | 0,517523 | -0,243597    | 0,124896     | 0,900606   | 1          | no  |
| AN7532 | ChrIV_A_nidulans_FGSC_A4:1861628-1862211 | WT_5hasex | WT_veg | OK     | 21,9453  | 53,5477  | 1,28691      | -1,74671     | 0,0806883  | 0,249144   | no  |
| AN7534 | ChrIV_A_nidulans_FGSC_A4:1866783-1867923 | WT_5hasex | WT_veg | OK     | 67,9647  | 141,668  | 1,05966      | -2,19341     | 0,0282777  | 0,115834   | no  |
| AN7535 | ChrIV_A_nidulans_FGSC_A4:1868274-1869855 | WT_5hasex | WT_veg | OK     | 53,1936  | 78,5278  | 0,561951     | -1,15885     | 0,246519   | 0,514378   | no  |
| AN7536 | ChrIV_A_nidulans_FGSC_A4:1871157-1871892 | WT_5hasex | WT_veg | OK     | 40,4741  | 52,9417  | 0,387403     | -0,696365    | 0,4862     | 0,740076   | no  |
| AN7537 | ChrIV_A_nidulans_FGSC_A4:1872994-1874893 | WT_5hasex | WT_veg | OK     | 26,7744  | 69,0128  | 1,36601      | -2,69427     | 0,00705439 | 0,0393595  | yes |
| AN7538 | ChrIV_A_nidulans_FGSC_A4:1876300-1879752 | WT_5hasex | WT_veg | OK     | 13,5354  | 28,568   | 1,07766      | -2,1509      | 0,0314839  | 0,126027   | no  |
| AN7539 | ChrIV_A_nidulans_FGSC_A4:1880682-1881120 | WT_5hasex | WT_veg | OK     | 4343,38  | 8003,84  | 0,881875     | -1,04911     | 0,294126   | 0,568953   | no  |
| AN7540 | ChrIV_A_nidulans_FGSC_A4:1883119-1885023 | WT_5hasex | WT_veg | OK     | 117,562  | 214,164  | 0,865296     | -1,77518     | 0,0758678  | 0,238719   | no  |
| AN7541 | ChrIV_A_nidulans_FGSC_A4:1887063-1888121 | WT_5hasex | WT_veg | OK     | 9,68698  | 36,7772  | 1,92469      | -2,75781     | 0,00581906 | 0,0336679  | yes |
| AN7543 | ChrIV_A_nidulans_FGSC_A4:1894284-1895642 | WT_5hasex | WT_veg | OK     | 39,9622  | 48,7318  | 0,286229     | -0,563072    | 0,573386   | 0,7971     | no  |
| AN7544 | ChrIV_A_nidulans_FGSC_A4:1896136-1898776 | WT_5hasex | WT_veg | OK     | 38,9515  | 63,2201  | 0,698706     | -1,448       | 0,147616   | 0,375223   | no  |
| AN7546 | ChrIV_A_nidulans_FGSC_A4:1905081-1905821 | WT_5hasex | WT_veg | OK     | 14,9616  | 20,786   | 0,474348     | -0,675319    | 0,499473   | 0,749315   | no  |
| AN7548 | ChrIV_A_nidulans_FGSC_A4:1917215-1918683 | WT_5hasex | WT_veg | OK     | 26,9256  | 23,6082  | -0,18969     | 0,367531     | 0,713223   | 0,876672   | no  |
| AN7549 | ChrIV_A_nidulans_FGSC_A4:1918973-1920926 | WT_5hasex | WT_veg | OK     | 25,0979  | 141,886  | 2,49909      | -5,08774     | 3,6236E-07 | 7,4174E-06 | yes |
| AN7550 | ChrIV_A_nidulans_FGSC_A4:1921472-1923712 | WT_5hasex | WT_veg | OK     | 14,4341  | 33,1208  | 1,19826      | -2,29425     | 0,0217764  | 0,095086   | no  |
| AN7551 | ChrIV_A_nidulans_FGSC_A4:1924505-1925444 | WT_5hasex | WT_veg | OK     | 7,10155  | 13,442   | 0,920542     | -1,27149     | 0,203555   | 0,459513   | no  |
| AN7552 | ChrIV_A_nidulans_FGSC_A4:1926055-1929994 | WT_5hasex | WT_veg | OK     | 6,66201  | 11,2632  | 0,757593     | -1,32644     | 0,184694   | 0,433143   | no  |
| AN7554 | ChrIV_A_nidulans_FGSC_A4:1941982-1944191 | WT_5hasex | WT_veg | OK     | 20,7347  | 140,947  | 2,76504      | -5,49296     | 3,9526E-08 | 1,004E-06  | yes |
| AN7555 | ChrIV_A_nidulans_FGSC_A4:1944649-1945499 | WT_5hasex | WT_veg | OK     | 22,4248  | 64,1473  | 1,51629      | -2,66951     | 0,00759627 | 0,041835   | yes |
| AN7556 | ChrIV_A_nidulans_FGSC_A4:1945676-1946874 | WT_5hasex | WT_veg | OK     | 9,43121  | 5,27434  | -0,838452    | 1,23605      | 0,216439   | 0,476454   | no  |
| AN7557 | ChrIV_A_nidulans_FGSC_A4:1947453-1949687 | WT_5hasex | WT_veg | OK     | 11,4633  | 6,1647   | -0,894918    | 1,55343      | 0,120321   | 0,328235   | no  |
| AN7558 | ChrIV_A_nidulans_FGSC_A4:1952643-1953319 | WT_5hasex | WT_veg | OK     | 340,54   | 1696,21  | 2,31642      | -3,84945     | 0,00011839 | 0,00127253 | yes |
| AN7559 | ChrIV_A_nidulans_FGSC_A4:1953376-1954864 | WT_5hasex | WT_veg | OK     | 7,01043  | 14,3057  | 1,02901      | -1,64787     | 0,0993797  | 0,28802    | no  |
| AN7561 | ChrIV_A_nidulans_FGSC_A4:1958199-1958774 | WT_5hasex | WT_veg | OK     | 260,435  | 502,68   | 0,948716     | -1,96269     | 0,0496819  | 0,176779   | no  |
| AN7562 | ChrIV_A_nidulans_FGSC_A4:1959144-1960636 | WT_5hasex | WT_veg | OK     | 6,47995  | 19,1825  | 1,56573      | -2,40488     | 0,0161778  | 0,0758545  | no  |
| AN7563 | ChrIV_A_nidulans_FGSC_A4:1961583-1964889 | WT_5hasex | WT_veg | OK     | 28,7925  | 41,9999  | 0,544693     | -1,10829     | 0,267737   | 0,339572   | no  |
| AN7564 | ChrIV_A_nidulans_FGSC_A4:1966068-1967420 | WT_5hasex | WT_veg | OK     | 27,9218  | 60,7512  | 1,12152      | -2,16635     | 0,0302842  | 0,122158   | no  |
| AN7565 | ChrIV_A_nidulans_FGSC_A4:1967934-1969789 | WT_5hasex | WT_veg | OK     | 10,3857  | 22,9808  | 1,14582      | -2,03652     | 0,0416979  | 0,155464   | no  |
| AN7566 | ChrIV_A_nidulans_FGSC_A4:1969948-1972120 | WT_5hasex | WT_veg | OK     | 13,002   | 16,4281  | 0,337424     | -0,631942    | 0,527425   | 0,767896   | no  |
| AN7567 | ChrIV_A_nidulans_FGSC_A4:1972855-1973671 | WT_5hasex | WT_veg | OK     | 56,9079  | 63,4102  | 0,156086     | -0,307893    | 0,758164   | 0,900095   | no  |
| AN7568 | ChrIV_A_nidulans_FGSC_A4:1974210-1975978 | WT_5hasex | WT_veg | OK     | 33,5179  | 74,016   | 1,14291      | -2,3525      | 0,0186476  | 0,0843666  | no  |
| AN7569 | ChrIV_A_nidulans_FGSC_A4:1976323-1977439 | WT_5hasex | WT_veg | OK     | 28,6875  | 116,154  | 2,01755      | -3,7815      | 0,00015589 | 0,00160605 | yes |
| AN7571 | ChrIV_A_nidulans_FGSC_A4:1981434-1984325 | WT_5hasex | WT_veg | OK     | 18,6587  | 54,9871  | 1,55925      | -3,1525      | 0,00161877 | 0,0117083  | yes |
| AN7574 | ChrIV_A_nidulans_FGSC_A4:2001149-2001699 | WT_5hasex | WT_veg | OK     | 1,90514  | 4,5862   | 1,2674       | -0,899728    | 0,368265   | 0,643016   | no  |
| AN7575 | ChrIV_A_nidulans_FGSC_A4:2002436-2003972 | WT_5hasex | WT_veg | OK     | 45,6632  | 103,926  | 1,18645      | -2,42806     | 0,0151797  | 0,0721614  | no  |
| AN7576 | ChrIV_A_nidulans_FGSC_A4:2005093-2008942 | WT_5hasex | WT_veg | OK     | 16,1224  | 34,0642  | 1,07919      | -2,13188     | 0,0330167  | 0,130636   | no  |
| AN7577 | ChrIV_A_nidulans_FGSC_A4:2010828-2012779 | WT_5hasex | WT_veg | OK     | 6,70454  | 40,3413  | 2,58905      | -4,19251     | 2,7588E-05 | 0,00035564 | yes |
| AN7578 | ChrIV_A_nidulans_FGSC_A4:2013497-2014728 | WT_5hasex | WT_veg | OK     | 24,0158  | 46,6502  | 0,957897     | -1,78896     | 0,0736212  | 0,233529   | no  |
| AN7579 | ChrIV_A_nidulans_FGSC_A4:2015076-2016088 | WT_5hasex | WT_veg | OK     | 149,382  | 239,719  | 0,682339     | -1,41615     | 0,156733   | 0,390097   | no  |
| AN7580 | ChrIV_A_nidulans_FGSC_A4:2018511-2019912 | WT_5hasex | WT_veg | OK     | 18,3563  | 22,7038  | 0,306655     | -0,490489    | 0,623788   | 0,826367   | no  |
| AN7583 | ChrIV_A_nidulans_FGSC_A4:2035213-2038064 | WT_5hasex | WT_veg | OK     | 41,2942  | 128,779  | 1,64089      | -3,10236     | 0,00191987 | 0,0134841  | yes |
| AN7584 | ChrIV_A_nidulans_FGSC_A4:2042540-2044265 | WT_5hasex | WT_veg | NOTEST | 0,714223 | 0,993333 | 0,475904     | -0,414836    | 0,678262   | 1          | no  |
| AN7585 | ChrIV_A_nidulans_FGSC_A4:2045683-2047190 | WT_5hasex | WT_veg | NOTEST | 0        | 1,19247  | 1.79769e+308 | 1.79769e+308 | 0,0399592  | 1          | no  |
| AN7587 | ChrIV_A_nidulans_FGSC_A4:2051890-2053101 | WT_5hasex | WT_veg | OK     | 126,774  | 277,904  | 1,13233      | -2,32584     | 0,0200272  | 0,0892494  | no  |
| AN7588 | ChrIV_A_nidulans_FGSC_A4:2053111-2054364 | WT_5hasex | WT_veg | OK     | 188,272  | 1002,79  | 2,41313      | -4,84619     | 1,2586E-06 | 2,257E-05  | yes |
| AN7590 | ChrIV_A_nidulans_FGSC_A4:2065740-2066541 | WT_5hasex | WT_veg | OK     | 617,895  | 1955,13  | 1,66183      | -2,88795     | 0,00387765 | 0,0241765  | yes |
| AN7591 | ChrIV_A_nidulans_FGSC_A4:2067350-2069228 | WT_5hasex | WT_veg | OK     | 56,9449  | 89,5435  | 0,653022     | -1,26954     | 0,204248   | 0,460407   | no  |
| AN7592 | ChrIV_A_nidulans_FGSC_A4:2069779-2073580 | WT_5hasex | WT_veg | OK     | 2,31901  | 4,16437  | 0,844585     | -1,20122     | 0,229668   | 0,493037   | no  |

## Supplementary table 1

|        |                                          |           |        |        |          |          |               |               |            |            |     |
|--------|------------------------------------------|-----------|--------|--------|----------|----------|---------------|---------------|------------|------------|-----|
| AN7594 | ChrIV_A_nidulans_FGSC_A4:2079203-2079872 | WT_5hasex | WT_veg | OK     | 6767,52  | 10192,7  | 0,590835      | -0,731121     | 0,464706   | 0,723828   | no  |
| AN7595 | ChrIV_A_nidulans_FGSC_A4:2080897-2081931 | WT_5hasex | WT_veg | OK     | 6,39818  | 10,5538  | 0,722034      | -1,0212       | 0,30716    | 0,583191   | no  |
| AN7596 | ChrIV_A_nidulans_FGSC_A4:2083993-2086338 | WT_5hasex | WT_veg | OK     | 35,7901  | 35,0007  | -0,0321755    | 0,0575571     | 0,954101   | 0,98293    | no  |
| AN7597 | ChrIV_A_nidulans_FGSC_A4:2087644-2090029 | WT_5hasex | WT_veg | OK     | 67,3431  | 157,583  | 1,22651       | -1,98525      | 0,0471162  | 0,170333   | no  |
| AN7598 | ChrIV_A_nidulans_FGSC_A4:2091125-2092019 | WT_5hasex | WT_veg | NOTEST | 1,06147  | 0        | -1.79769e+308 | -1.79769e+308 | 0,0472965  | 1          | no  |
| AN7599 | ChrIV_A_nidulans_FGSC_A4:2096235-2096754 | WT_5hasex | WT_veg | NOTEST | 0,751769 | 0        | -1.79769e+308 | -1.79769e+308 | 0,224063   | 1          | no  |
| AN7600 | ChrIV_A_nidulans_FGSC_A4:2099230-2104020 | WT_5hasex | WT_veg | OK     | 21,5836  | 42,6381  | 0,982205      | -2,06583      | 0,0388446  | 0,147622   | no  |
| AN7601 | ChrIV_A_nidulans_FGSC_A4:2104991-2106112 | WT_5hasex | WT_veg | OK     | 65,2207  | 137,883  | 1,08004       | -2,22736      | 0,025923   | 0,108526   | no  |
| AN7603 | ChrIV_A_nidulans_FGSC_A4:2108495-2109477 | WT_5hasex | WT_veg | OK     | 120,19   | 120,349  | 0,00191131    | -0,00393075   | 0,996864   | 0,99877    | no  |
| AN7604 | ChrIV_A_nidulans_FGSC_A4:2110638-2114128 | WT_5hasex | WT_veg | OK     | 48,4362  | 216,923  | 2,16302       | -4,24904      | 2,1469E-05 | 0,0002838  | yes |
| AN7605 | ChrIV_A_nidulans_FGSC_A4:2114455-2115760 | WT_5hasex | WT_veg | OK     | 10,7242  | 33,8857  | 1,65981       | -2,69765      | 0,00698305 | 0,0390487  | yes |
| AN7607 | ChrIV_A_nidulans_FGSC_A4:2125944-2127342 | WT_5hasex | WT_veg | OK     | 18,4652  | 54,3077  | 1,55635       | -2,882        | 0,00395161 | 0,0245463  | yes |
| AN7608 | ChrIV_A_nidulans_FGSC_A4:2129343-2130499 | WT_5hasex | WT_veg | OK     | 14,2448  | 46,2459  | 1,69889       | -2,83705      | 0,00455328 | 0,0275967  | yes |
| AN7609 | ChrIV_A_nidulans_FGSC_A4:2131036-2135266 | WT_5hasex | WT_veg | OK     | 16,777   | 87,3531  | 2,38037       | -4,96143      | 6,9977E-07 | 1,3368E-05 | yes |
| AN7611 | ChrIV_A_nidulans_FGSC_A4:2139736-2140868 | WT_5hasex | WT_veg | OK     | 16,8316  | 37,6389  | 1,16106       | -2,04015      | 0,0413356  | 0,15439    | no  |
| AN7612 | ChrIV_A_nidulans_FGSC_A4:2141249-2142164 | WT_5hasex | WT_veg | NOTEST | 0        | 0        | 0             | 0             | 1          | 1          | no  |
| AN7613 | ChrIV_A_nidulans_FGSC_A4:2142825-2145612 | WT_5hasex | WT_veg | NOTEST | 0        | 0,309822 | 1.79769e+308  | 1.79769e+308  | 0,123323   | 1          | no  |
| AN7614 | ChrIV_A_nidulans_FGSC_A4:2146122-2147585 | WT_5hasex | WT_veg | NOTEST | 0,815988 | 1,40288  | 0,781772      | -0,661315     | 0,50841    | 1          | no  |
| AN7615 | ChrIV_A_nidulans_FGSC_A4:2149327-2150673 | WT_5hasex | WT_veg | OK     | 53,6098  | 63,1917  | 0,237238      | -0,48059      | 0,630808   | 0,830877   | no  |
| AN7616 | ChrIV_A_nidulans_FGSC_A4:2151285-2153586 | WT_5hasex | WT_veg | NOTEST | 0,41552  | 2,88864  | 2,7974        | -2,79669      | 0,00516298 | 1          | no  |
| AN7617 | ChrIV_A_nidulans_FGSC_A4:2154068-2154806 | WT_5hasex | WT_veg | OK     | 101,917  | 374,562  | 1,87782       | -3,81768      | 0,00013471 | 0,00142324 | yes |
| AN7618 | ChrIV_A_nidulans_FGSC_A4:2155261-2157147 | WT_5hasex | WT_veg | OK     | 4,62514  | 13,5561  | 1,55138       | -2,43165      | 0,0150303  | 0,0716473  | no  |
| AN7621 | ChrIV_A_nidulans_FGSC_A4:2165290-2166670 | WT_5hasex | WT_veg | OK     | 11,5477  | 11,9244  | 0,0463188     | -0,0782884    | 0,937599   | 0,976505   | no  |
| AN7622 | ChrIV_A_nidulans_FGSC_A4:2168270-2169755 | WT_5hasex | WT_veg | OK     | 50,2761  | 33,4044  | -0,589834     | 1,2081        | 0,227009   | 0,489879   | no  |
| AN7625 | ChrIV_A_nidulans_FGSC_A4:2178026-2180174 | WT_5hasex | WT_veg | OK     | 1174,08  | 1086,56  | -0,111758     | 0,174571      | 0,861417   | 0,946395   | no  |
| AN7626 | ChrIV_A_nidulans_FGSC_A4:2183201-2185696 | WT_5hasex | WT_veg | OK     | 3,55426  | 3,27065  | -0,119975     | 0,174982      | 0,861094   | 0,946301   | no  |
| AN7629 | ChrIV_A_nidulans_FGSC_A4:2193082-2193753 | WT_5hasex | WT_veg | OK     | 248,392  | 294,843  | 0,247331      | -0,502608     | 0,61524    | 0,822006   | no  |
| AN7630 | ChrIV_A_nidulans_FGSC_A4:2193853-2195531 | WT_5hasex | WT_veg | OK     | 26,7155  | 116,91   | 2,12965       | -4,27568      | 1,9056E-05 | 0,00025545 | yes |
| AN7631 | ChrIV_A_nidulans_FGSC_A4:2195796-2197874 | WT_5hasex | WT_veg | OK     | 12,3988  | 21,7919  | 0,813591      | -1,4494       | 0,147225   | 0,374691   | no  |
| AN7632 | ChrIV_A_nidulans_FGSC_A4:2201263-2202941 | WT_5hasex | WT_veg | OK     | 140,022  | 218,933  | 0,644831      | -1,25954      | 0,207835   | 0,465184   | no  |
| AN7633 | ChrIV_A_nidulans_FGSC_A4:2203722-2204796 | WT_5hasex | WT_veg | OK     | 22,1451  | 23,6682  | 0,0959643     | -0,170142     | 0,864898   | 0,948108   | no  |
| AN7634 | ChrIV_A_nidulans_FGSC_A4:2205180-2207243 | WT_5hasex | WT_veg | NOTEST | 0,794579 | 0,5547   | -0,518482     | 0,415085      | 0,67808    | 1          | no  |
| AN7636 | ChrIV_A_nidulans_FGSC_A4:2208577-2210525 | WT_5hasex | WT_veg | OK     | 94,8574  | 194,201  | 1,03372       | -2,14165      | 0,0322217  | 0,128246   | no  |
| AN7637 | ChrIV_A_nidulans_FGSC_A4:2211621-2221187 | WT_5hasex | WT_veg | NOTEST | 0,197581 | 0,227318 | 0,202265      | -0,20825      | 0,835034   | 1          | no  |
| AN7638 | ChrIV_A_nidulans_FGSC_A4:2222142-2223122 | WT_5hasex | WT_veg | NOTEST | 0        | 0        | 0             | 0             | 1          | 1          | no  |
| AN7640 | ChrIV_A_nidulans_FGSC_A4:2227769-2229430 | WT_5hasex | WT_veg | OK     | 27,4922  | 52,5212  | 0,933877      | -1,78691      | 0,0739515  | 0,234265   | no  |
| AN7641 | ChrIV_A_nidulans_FGSC_A4:2230982-2233306 | WT_5hasex | WT_veg | OK     | 12,8142  | 21,0096  | 0,7133        | -1,19064      | 0,233796   | 0,498936   | no  |
| AN7642 | ChrIV_A_nidulans_FGSC_A4:2234783-2236195 | WT_5hasex | WT_veg | NOTEST | 0,329002 | 3,58199  | 3,44459       | -2,43255      | 0,014993   | 1          | no  |
| AN7644 | ChrIV_A_nidulans_FGSC_A4:2241099-2241775 | WT_5hasex | WT_veg | OK     | 3,78164  | 9,70242  | 1,35933       | -1,56915      | 0,116612   | 0,321262   | no  |
| AN7645 | ChrIV_A_nidulans_FGSC_A4:2242549-2243003 | WT_5hasex | WT_veg | NOTEST | 0,625544 | 2,91652  | 2,22106       | -1,14626      | 0,251686   | 1          | no  |
| AN7648 | ChrIV_A_nidulans_FGSC_A4:2252906-2254598 | WT_5hasex | WT_veg | OK     | 12,9248  | 14,1868  | 0,134403      | -0,212954     | 0,831363   | 0,932941   | no  |
| AN7649 | ChrIV_A_nidulans_FGSC_A4:2255708-2256754 | WT_5hasex | WT_veg | OK     | 254,792  | 250,266  | -0,025854     | 0,0508105     | 0,959477   | 0,985009   | no  |
| AN7651 | ChrIV_A_nidulans_FGSC_A4:2263473-2265153 | WT_5hasex | WT_veg | OK     | 10,6352  | 14,1895  | 0,41598       | -0,727087     | 0,467172   | 0,725813   | no  |
| AN7652 | ChrIV_A_nidulans_FGSC_A4:2267510-2269999 | WT_5hasex | WT_veg | OK     | 6,12611  | 5,87118  | -0,0613219    | 0,0976218     | 0,922233   | 0,970581   | no  |
| AN7654 | ChrIV_A_nidulans_FGSC_A4:2275667-2276863 | WT_5hasex | WT_veg | OK     | 112,568  | 211,201  | 0,90782       | -1,81388      | 0,0696964  | 0,224766   | no  |
| AN7656 | ChrIV_A_nidulans_FGSC_A4:2281810-2283169 | WT_5hasex | WT_veg | OK     | 14,4959  | 21,7972  | 0,588496      | -1,00516      | 0,314818   | 0,591024   | no  |
| AN7659 | ChrIV_A_nidulans_FGSC_A4:2294318-2296239 | WT_5hasex | WT_veg | OK     | 55,7173  | 77,0788  | 0,468209      | -0,964045     | 0,335023   | 0,611234   | no  |
| AN7661 | ChrIV_A_nidulans_FGSC_A4:2302033-2305283 | WT_5hasex | WT_veg | OK     | 62,9047  | 179,59   | 1,51347       | -3,11214      | 0,00185739 | 0,0131246  | yes |
| AN7663 | ChrIV_A_nidulans_FGSC_A4:2308223-2309357 | WT_5hasex | WT_veg | NOTEST | 0,660026 | 0        | -1.79769e+308 | -1.79769e+308 | 0,0908325  | 1          | no  |
| AN7665 | ChrIV_A_nidulans_FGSC_A4:2316532-2317392 | WT_5hasex | WT_veg | OK     | 19,7856  | 23,7406  | 0,262902      | -0,441859     | 0,658591   | 0,846156   | no  |
| AN7666 | ChrIV_A_nidulans_FGSC_A4:2318398-2320380 | WT_5hasex | WT_veg | OK     | 20,6265  | 47,5785  | 1,21126       | -2,40313      | 0,0162556  | 0,0761393  | no  |
| AN7667 | ChrIV_A_nidulans_FGSC_A4:2323078-2324740 | WT_5hasex | WT_veg | OK     | 2,55322  | 2,63517  | 0,0455788     | -0,0560939    | 0,955267   | 0,983418   | no  |
| AN7668 | ChrIV_A_nidulans_FGSC_A4:2325277-2326043 | WT_5hasex | WT_veg | OK     | 11,2746  | 7,76409  | -0,538188     | 0,706718      | 0,479742   | 0,734921   | no  |

## Supplementary table 1

|        |                                          |           |        |        |          |         |               |               |            |            |     |
|--------|------------------------------------------|-----------|--------|--------|----------|---------|---------------|---------------|------------|------------|-----|
| AN7669 | ChrIV_A_nidulans_FGSC_A4:2326440-2328062 | WT_5hasex | WT_veg | OK     | 13,1482  | 11,4568 | -0,198664     | 0,32741       | 0,743358   | 0,892056   | no  |
| AN7670 | ChrIV_A_nidulans_FGSC_A4:2330476-2331919 | WT_5hasex | WT_veg | OK     | 61,9163  | 100,451 | 0,698098      | -1,434        | 0,151573   | 0,381604   | no  |
| AN7671 | ChrIV_A_nidulans_FGSC_A4:2332975-2334255 | WT_5hasex | WT_veg | OK     | 13,9299  | 44,156  | 1,66442       | -2,63212      | 0,00848542 | 0,0457086  | yes |
| AN7672 | ChrIV_A_nidulans_FGSC_A4:2334526-2336250 | WT_5hasex | WT_veg | OK     | 28,8741  | 121,777 | 2,07639       | -4,12284      | 3,7423E-05 | 0,00046537 | yes |
| AN7673 | ChrIV_A_nidulans_FGSC_A4:2336652-2338101 | WT_5hasex | WT_veg | OK     | 20,0408  | 15,648  | -0,356965     | 0,639374      | 0,52258    | 0,764927   | no  |
| AN7674 | ChrIV_A_nidulans_FGSC_A4:2338343-2339321 | WT_5hasex | WT_veg | OK     | 20,6089  | 163,788 | 2,9905        | -4,87742      | 1,0748E-06 | 1,9564E-05 | yes |
| AN7675 | ChrIV_A_nidulans_FGSC_A4:2339513-2340328 | WT_5hasex | WT_veg | NOTEST | 0        | 0       | 0             | 0             | 1          | 1          | no  |
| AN7676 | ChrIV_A_nidulans_FGSC_A4:2340911-2345658 | WT_5hasex | WT_veg | OK     | 8,50609  | 15,0071 | 0,819081      | -1,58245      | 0,113546   | 0,315769   | no  |
| AN7677 | ChrIV_A_nidulans_FGSC_A4:2346519-2348409 | WT_5hasex | WT_veg | OK     | 44,0648  | 60,6545 | 0,46099       | -0,947601     | 0,343332   | 0,618805   | no  |
| AN7678 | ChrIV_A_nidulans_FGSC_A4:2349371-2353853 | WT_5hasex | WT_veg | OK     | 8,60905  | 11,4011 | 0,405245      | -0,781978     | 0,434228   | 0,699921   | no  |
| AN7679 | ChrIV_A_nidulans_FGSC_A4:2354695-2356159 | WT_5hasex | WT_veg | OK     | 37,7007  | 49,2582 | 0,385774      | -0,741921     | 0,458135   | 0,718697   | no  |
| AN7680 | ChrIV_A_nidulans_FGSC_A4:2356336-2358614 | WT_5hasex | WT_veg | OK     | 16,0706  | 17,4667 | 0,120183      | -0,231368     | 0,817029   | 0,926749   | no  |
| AN7681 | ChrIV_A_nidulans_FGSC_A4:2359351-2360350 | WT_5hasex | WT_veg | OK     | 85,5469  | 158,65  | 0,891064      | -1,84926      | 0,0644196  | 0,21255    | no  |
| AN7682 | ChrIV_A_nidulans_FGSC_A4:2360944-2362027 | WT_5hasex | WT_veg | OK     | 138,984  | 298,781 | 1,10417       | -2,27977      | 0,0226214  | 0,0976928  | no  |
| AN7683 | ChrIV_A_nidulans_FGSC_A4:2364852-2365905 | WT_5hasex | WT_veg | OK     | 422,563  | 773,135 | 0,871553      | -1,66503      | 0,0959059  | 0,281156   | no  |
| AN7684 | ChrIV_A_nidulans_FGSC_A4:2367119-2368702 | WT_5hasex | WT_veg | OK     | 3,20699  | 8,08291 | 1,33366       | -1,85512      | 0,0635794  | 0,210493   | no  |
| AN7686 | ChrIV_A_nidulans_FGSC_A4:2377052-2379470 | WT_5hasex | WT_veg | OK     | 127,809  | 159,4   | 0,318663      | -0,637461     | 0,523825   | 0,765724   | no  |
| AN7687 | ChrIV_A_nidulans_FGSC_A4:2380219-2382796 | WT_5hasex | WT_veg | OK     | 109,171  | 243,852 | 1,15942       | -2,28858      | 0,0221037  | 0,0960363  | no  |
| AN7689 | ChrIV_A_nidulans_FGSC_A4:2385977-2387405 | WT_5hasex | WT_veg | OK     | 13,0847  | 42,2047 | 1,68952       | -2,98202      | 0,00286353 | 0,018785   | yes |
| AN7690 | ChrIV_A_nidulans_FGSC_A4:2388817-2390013 | WT_5hasex | WT_veg | OK     | 101,699  | 179,076 | 0,816269      | -1,5712       | 0,116136   | 0,320304   | no  |
| AN7692 | ChrIV_A_nidulans_FGSC_A4:2393034-2394025 | WT_5hasex | WT_veg | NOTEST | 0        | 0       | 0             | 0             | 1          | 1          | no  |
| AN7695 | ChrIV_A_nidulans_FGSC_A4:2402252-2404147 | WT_5hasex | WT_veg | OK     | 25,6568  | 37,9529 | 0,564866      | -1,13332      | 0,257078   | 0,526947   | no  |
| AN7699 | ChrIV_A_nidulans_FGSC_A4:2416122-2417685 | WT_5hasex | WT_veg | OK     | 50,3968  | 160,41  | 1,67036       | -3,41962      | 0,00062709 | 0,00528052 | yes |
| AN7700 | ChrIV_A_nidulans_FGSC_A4:2418816-2421093 | WT_5hasex | WT_veg | OK     | 42,4474  | 78,3217 | 0,883735      | -1,79904      | 0,0720126  | 0,230084   | no  |
| AN7701 | ChrIV_A_nidulans_FGSC_A4:2423346-2423864 | WT_5hasex | WT_veg | OK     | 66,2202  | 125,973 | 0,927775      | -1,63338      | 0,10239    | 0,29453    | no  |
| AN7702 | ChrIV_A_nidulans_FGSC_A4:2425119-2428074 | WT_5hasex | WT_veg | NOTEST | 0,112108 | 1,48477 | 3,72728       | -1,88543      | 0,0593719  | 1          | no  |
| AN7704 | ChrIV_A_nidulans_FGSC_A4:2434289-2437155 | WT_5hasex | WT_veg | OK     | 69,8313  | 103,865 | 0,572769      | -1,17414      | 0,240339   | 0,506118   | no  |
| AN7705 | ChrIV_A_nidulans_FGSC_A4:2437322-2439029 | WT_5hasex | WT_veg | OK     | 43,723   | 71,8071 | 0,715736      | -1,47173      | 0,141093   | 0,364358   | no  |
| AN7706 | ChrIV_A_nidulans_FGSC_A4:2439331-2440990 | WT_5hasex | WT_veg | OK     | 66,5669  | 153,77  | 1,2079        | -2,49465      | 0,0126082  | 0,0625599  | no  |
| AN7707 | ChrIV_A_nidulans_FGSC_A4:2441195-2443610 | WT_5hasex | WT_veg | OK     | 42,1597  | 71,3562 | 0,759175      | -1,55559      | 0,119806   | 0,327391   | no  |
| AN7708 | ChrIV_A_nidulans_FGSC_A4:2445025-2447630 | WT_5hasex | WT_veg | OK     | 478,528  | 2228,36 | 2,21931       | -4,14842      | 3,3478E-05 | 0,00042192 | yes |
| AN7709 | ChrIV_A_nidulans_FGSC_A4:2445025-2447630 | WT_5hasex | WT_veg | OK     | 19,3567  | 49,7455 | 1,36173       | -2,54137      | 0,0110418  | 0,0563347  | no  |
| AN7710 | ChrIV_A_nidulans_FGSC_A4:2448968-2450308 | WT_5hasex | WT_veg | OK     | 851,897  | 2410,52 | 1,50059       | -2,37385      | 0,0176036  | 0,0807974  | no  |
| AN7711 | ChrIV_A_nidulans_FGSC_A4:2451739-2453011 | WT_5hasex | WT_veg | OK     | 137,576  | 162,119 | 0,236822      | -0,481138     | 0,630418   | 0,830739   | no  |
| AN7712 | ChrIV_A_nidulans_FGSC_A4:2453105-2454091 | WT_5hasex | WT_veg | OK     | 251,244  | 1078,99 | 2,10252       | -4,15565      | 3,2436E-05 | 0,00041131 | yes |
| AN7713 | ChrIV_A_nidulans_FGSC_A4:2455950-2457498 | WT_5hasex | WT_veg | OK     | 56,4153  | 130,337 | 1,20809       | -2,45635      | 0,0140358  | 0,0679135  | no  |
| AN7714 | ChrIV_A_nidulans_FGSC_A4:2459274-2462051 | WT_5hasex | WT_veg | OK     | 57,0832  | 70,0388 | 0,295089      | -0,584455     | 0,558914   | 0,788165   | no  |
| AN7715 | ChrIV_A_nidulans_FGSC_A4:2462863-2464186 | WT_5hasex | WT_veg | OK     | 36,1322  | 33,5321 | -0,107742     | 0,211536      | 0,832469   | 0,933552   | no  |
| AN7716 | ChrIV_A_nidulans_FGSC_A4:2464579-2465317 | WT_5hasex | WT_veg | OK     | 3,94318  | 3,67196 | -0,10281      | 0,105053      | 0,916334   | 0,968125   | no  |
| AN7717 | ChrIV_A_nidulans_FGSC_A4:2466030-2467266 | WT_5hasex | WT_veg | OK     | 153,751  | 268,953 | 0,806759      | -1,54747      | 0,12175    | 0,330915   | no  |
| AN7719 | ChrIV_A_nidulans_FGSC_A4:2471781-2472739 | WT_5hasex | WT_veg | OK     | 47,283   | 116,969 | 1,30674       | -2,56024      | 0,0104599  | 0,0539703  | no  |
| AN7720 | ChrIV_A_nidulans_FGSC_A4:2475442-2476990 | WT_5hasex | WT_veg | OK     | 18,5456  | 19,6793 | 0,0856017     | -0,158911     | 0,873739   | 0,951647   | no  |
| AN7721 | ChrIV_A_nidulans_FGSC_A4:2477390-2479512 | WT_5hasex | WT_veg | OK     | 142,407  | 142,678 | 0,00274216    | -0,00548419   | 0,995624   | 0,998362   | no  |
| AN7722 | ChrIV_A_nidulans_FGSC_A4:2479570-2481023 | WT_5hasex | WT_veg | OK     | 74,6562  | 77,8732 | 0,0608644     | -0,118789     | 0,905442   | 0,96388    | no  |
| AN7723 | ChrIV_A_nidulans_FGSC_A4:2481574-2483236 | WT_5hasex | WT_veg | OK     | 21,4899  | 24,8047 | 0,206957      | -0,39625      | 0,691921   | 0,864831   | no  |
| AN7724 | ChrIV_A_nidulans_FGSC_A4:2483342-2483979 | WT_5hasex | WT_veg | OK     | 128,059  | 753,81  | 2,5574        | -5,30636      | 1,1184E-07 | 2,576E-06  | yes |
| AN7727 | ChrIV_A_nidulans_FGSC_A4:2491875-2493909 | WT_5hasex | WT_veg | OK     | 41,8415  | 180,15  | 2,10619       | -4,14021      | 3,4699E-05 | 0,00043552 | yes |
| AN7728 | ChrIV_A_nidulans_FGSC_A4:2503308-2504374 | WT_5hasex | WT_veg | NOTEST | 0,329047 | 0       | -1.79769e+308 | -1.79769e+308 | 0,224063   | 1          | no  |
| AN7729 | ChrIV_A_nidulans_FGSC_A4:2506580-2511471 | WT_5hasex | WT_veg | OK     | 38,8854  | 107,787 | 1,47088       | -3,01968      | 0,00253045 | 0,016987   | yes |
| AN7731 | ChrIV_A_nidulans_FGSC_A4:2519933-2523149 | WT_5hasex | WT_veg | OK     | 6,57165  | 11,5508 | 0,813662      | -1,40427      | 0,160237   | 0,395741   | no  |
| AN7732 | ChrIV_A_nidulans_FGSC_A4:2523692-2524930 | WT_5hasex | WT_veg | OK     | 15,0741  | 23,2046 | 0,622345      | -1,09498      | 0,273527   | 0,546256   | no  |
| AN7733 | ChrIV_A_nidulans_FGSC_A4:2527014-2528252 | WT_5hasex | WT_veg | OK     | 16,0826  | 20,643  | 0,360156      | -0,627164     | 0,530552   | 0,769923   | no  |
| AN7736 | ChrIV_A_nidulans_FGSC_A4:2540017-2542133 | WT_5hasex | WT_veg | OK     | 121,514  | 226,535 | 0,898612      | -1,69085      | 0,0908646  | 0,270677   | no  |



## Supplementary table 1

|        |                                          |           |        |        |          |          |               |               |            |            |     |
|--------|------------------------------------------|-----------|--------|--------|----------|----------|---------------|---------------|------------|------------|-----|
| AN7737 | ChrIV_A_nidulans_FGSC_A4:2542427-2544464 | WT_5hasex | WT_veg | NOTEST | 0,583711 | 0,873355 | 0,581313      | -0,51741      | 0,60487    | 1          | no  |
| AN7738 | ChrIV_A_nidulans_FGSC_A4:2545129-2545651 | WT_5hasex | WT_veg | OK     | 5,31698  | 9,36964  | 0,817387      | -0,980201     | 0,326987   | 0,603262   | no  |
| AN7739 | ChrIV_A_nidulans_FGSC_A4:2548545-2549388 | WT_5hasex | WT_veg | OK     | 20,0056  | 25,4794  | 0,348928      | -0,59368      | 0,552726   | 0,783637   | no  |
| AN7741 | ChrIV_A_nidulans_FGSC_A4:2550696-2552149 | WT_5hasex | WT_veg | OK     | 33,6395  | 43,8262  | 0,381637      | -0,760699     | 0,446837   | 0,710007   | no  |
| AN7742 | ChrIV_A_nidulans_FGSC_A4:2559828-2560900 | WT_5hasex | WT_veg | OK     | 173,435  | 236,009  | 0,444452      | -0,918321     | 0,358451   | 0,633445   | no  |
| AN7744 | ChrIV_A_nidulans_FGSC_A4:2564390-2565949 | WT_5hasex | WT_veg | OK     | 9,55343  | 13,2029  | 0,466765      | -0,753283     | 0,45128    | 0,713148   | no  |
| AN7745 | ChrIV_A_nidulans_FGSC_A4:2566609-2570120 | WT_5hasex | WT_veg | OK     | 14,4516  | 10,7694  | -0,424294     | 0,862244      | 0,388553   | 0,661994   | no  |
| AN7747 | ChrIV_A_nidulans_FGSC_A4:2571772-2573116 | WT_5hasex | WT_veg | OK     | 23,1219  | 57,3457  | 1,31043       | -2,41782      | 0,0156139  | 0,0737181  | no  |
| AN7749 | ChrIV_A_nidulans_FGSC_A4:2582519-2584911 | WT_5hasex | WT_veg | OK     | 60,7577  | 177,419  | 1,54602       | -3,20952      | 0,00132955 | 0,00993597 | yes |
| AN7750 | ChrIV_A_nidulans_FGSC_A4:2586744-2589951 | WT_5hasex | WT_veg | OK     | 43,7642  | 74,564   | 0,768728      | -1,60697      | 0,108061   | 0,305769   | no  |
| AN7752 | ChrIV_A_nidulans_FGSC_A4:2596677-2598205 | WT_5hasex | WT_veg | OK     | 113,887  | 193,755  | 0,766637      | -1,59083      | 0,111647   | 0,312144   | no  |
| AN7754 | ChrIV_A_nidulans_FGSC_A4:2601289-2602503 | WT_5hasex | WT_veg | OK     | 5,88099  | 20,8539  | 1,82619       | -2,51766      | 0,0118136  | 0,059399   | no  |
| AN7755 | ChrIV_A_nidulans_FGSC_A4:2603482-2604481 | WT_5hasex | WT_veg | OK     | 30,0258  | 131,713  | 2,13313       | -4,08491      | 4,4094E-05 | 0,00053711 | yes |
| AN7756 | ChrIV_A_nidulans_FGSC_A4:2604714-2606036 | WT_5hasex | WT_veg | OK     | 1,45792  | 11,0304  | 2,91949       | -3,58209      | 0,00034085 | 0,00313851 | yes |
| AN7758 | ChrIV_A_nidulans_FGSC_A4:2617185-2618449 | WT_5hasex | WT_veg | OK     | 66,3713  | 104,933  | 0,660832      | -1,3198       | 0,186902   | 0,436241   | no  |
| AN7759 | ChrIV_A_nidulans_FGSC_A4:2618468-2620140 | WT_5hasex | WT_veg | OK     | 14,7024  | 29,0278  | 0,981383      | -1,79347      | 0,0728973  | 0,231893   | no  |
| AN7760 | ChrIV_A_nidulans_FGSC_A4:2620517-2622132 | WT_5hasex | WT_veg | OK     | 42,0299  | 83,1612  | 0,984495      | -2,02212      | 0,0431641  | 0,159535   | no  |
| AN7761 | ChrIV_A_nidulans_FGSC_A4:2622446-2625307 | WT_5hasex | WT_veg | OK     | 5,00239  | 7,3197   | 0,549167      | -0,918286     | 0,358469   | 0,633456   | no  |
| AN7762 | ChrIV_A_nidulans_FGSC_A4:2625539-2626916 | WT_5hasex | WT_veg | OK     | 18,4404  | 75,7132  | 2,03767       | -3,61644      | 0,00029868 | 0,00281094 | yes |
| AN7764 | ChrIV_A_nidulans_FGSC_A4:2636641-2638422 | WT_5hasex | WT_veg | OK     | 6,03572  | 6,79969  | 0,171941      | -0,262631     | 0,792835   | 0,915859   | no  |
| AN7765 | ChrIV_A_nidulans_FGSC_A4:2639574-2640934 | WT_5hasex | WT_veg | OK     | 41,339   | 71,9429  | 0,799348      | -1,54906      | 0,121368   | 0,330213   | no  |
| AN7766 | ChrIV_A_nidulans_FGSC_A4:2641203-2642019 | WT_5hasex | WT_veg | OK     | 3,2383   | 2,80025  | -0,209684     | 0,205652      | 0,837062   | 0,93521    | no  |
| AN7767 | ChrIV_A_nidulans_FGSC_A4:2642761-2643766 | WT_5hasex | WT_veg | NOTEST | 0,60029  | 2,56319  | 2,09421       | -1,86306      | 0,0624531  | 1          | no  |
| AN7768 | ChrIV_A_nidulans_FGSC_A4:2644126-2646609 | WT_5hasex | WT_veg | NOTEST | 0,259871 | 0,346491 | 0,415022      | -0,257488     | 0,796802   | 1          | no  |
| AN7769 | ChrIV_A_nidulans_FGSC_A4:2647406-2648191 | WT_5hasex | WT_veg | NOTEST | 0,255992 | 0        | -1.79769e+308 | -1.79769e+308 | 0,165569   | 1          | no  |
| AN7770 | ChrIV_A_nidulans_FGSC_A4:2648599-2649817 | WT_5hasex | WT_veg | OK     | 33,4913  | 23,5954  | -0,505279     | 0,936622      | 0,348953   | 0,624715   | no  |
| AN7771 | ChrIV_A_nidulans_FGSC_A4:2650412-2651026 | WT_5hasex | WT_veg | OK     | 219,629  | 619,753  | 1,49662       | -3,01826      | 0,00254227 | 0,0170555  | yes |
| AN7774 | ChrIV_A_nidulans_FGSC_A4:2658568-2659880 | WT_5hasex | WT_veg | OK     | 37,0996  | 7,71963  | -2,2648       | 3,49539       | 0,00047336 | 0,00415496 | yes |
| AN7775 | ChrIV_A_nidulans_FGSC_A4:2660815-2662144 | WT_5hasex | WT_veg | NOTEST | 0,867541 | 0,936494 | 0,110337      | -0,0819189    | 0,934711   | 1          | no  |
| AN7776 | ChrIV_A_nidulans_FGSC_A4:2664014-2665644 | WT_5hasex | WT_veg | OK     | 9,71622  | 33,2341  | 1,7742        | -2,86509      | 0,00416889 | 0,0256587  | yes |
| AN7777 | ChrIV_A_nidulans_FGSC_A4:2666052-2667795 | WT_5hasex | WT_veg | OK     | 39,6498  | 55,6569  | 0,489247      | -1,00511      | 0,314842   | 0,591024   | no  |
| AN7778 | ChrIV_A_nidulans_FGSC_A4:2668318-2669415 | WT_5hasex | WT_veg | OK     | 14,1858  | 15,1678  | 0,0965633     | -0,157232     | 0,875062   | 0,952178   | no  |
| AN7779 | ChrIV_A_nidulans_FGSC_A4:2670465-2672265 | WT_5hasex | WT_veg | OK     | 50,1336  | 127,292  | 1,34429       | -2,68598      | 0,00723174 | 0,0401821  | yes |
| AN7780 | ChrIV_A_nidulans_FGSC_A4:2674056-2674531 | WT_5hasex | WT_veg | OK     | 91,8431  | 109,522  | 0,253983      | -0,476158     | 0,633962   | 0,832603   | no  |
| AN7781 | ChrIV_A_nidulans_FGSC_A4:2674705-2675861 | WT_5hasex | WT_veg | OK     | 4,92898  | 10,8944  | 1,14422       | -1,61546      | 0,106211   | 0,302203   | no  |
| AN7782 | ChrIV_A_nidulans_FGSC_A4:2676502-2677510 | WT_5hasex | WT_veg | OK     | 7,18866  | 21,3902  | 1,57316       | -2,28342      | 0,0224055  | 0,0970264  | no  |
| AN7783 | ChrIV_A_nidulans_FGSC_A4:2678587-2684045 | WT_5hasex | WT_veg | OK     | 8,3348   | 13,972   | 0,745322      | -1,48436      | 0,137714   | 0,358656   | no  |
| AN7785 | ChrIV_A_nidulans_FGSC_A4:2690313-2691821 | WT_5hasex | WT_veg | OK     | 393,432  | 466,772  | 0,246603      | -0,430451     | 0,666868   | 0,851139   | no  |
| AN7786 | ChrIV_A_nidulans_FGSC_A4:2692816-2693337 | WT_5hasex | WT_veg | OK     | 12,5675  | 28,3326  | 1,17277       | -1,68124      | 0,092716   | 0,274709   | no  |
| AN7787 | ChrIV_A_nidulans_FGSC_A4:2693560-2694809 | WT_5hasex | WT_veg | NOTEST | 0,860463 | 0        | -1.79769e+308 | -1.79769e+308 | 0,0444135  | 1          | no  |
| AN7788 | ChrIV_A_nidulans_FGSC_A4:2695557-2697101 | WT_5hasex | WT_veg | NOTEST | 0,120926 | 0,563803 | 2,22106       | -1,14626      | 0,251686   | 1          | no  |
| AN7789 | ChrIV_A_nidulans_FGSC_A4:2697136-2698903 | WT_5hasex | WT_veg | NOTEST | 0,279108 | 0,456349 | 0,709313      | -0,425388     | 0,670554   | 1          | no  |
| AN7790 | ChrIV_A_nidulans_FGSC_A4:2699188-2702650 | WT_5hasex | WT_veg | NOTEST | 0,140396 | 0        | -1.79769e+308 | -1.79769e+308 | 0,238385   | 1          | no  |
| AN7792 | ChrIV_A_nidulans_FGSC_A4:2707047-2709115 | WT_5hasex | WT_veg | OK     | 43,8126  | 57,7934  | 0,399558      | -0,646704     | 0,517824   | 0,761866   | no  |
| AN7794 | ChrIV_A_nidulans_FGSC_A4:2712885-2714263 | WT_5hasex | WT_veg | OK     | 44,8171  | 146,935  | 1,71306       | -3,11326      | 0,00185031 | 0,0130845  | yes |
| AN7796 | ChrIV_A_nidulans_FGSC_A4:2718415-2719515 | WT_5hasex | WT_veg | OK     | 49,4984  | 13,1882  | -1,90814      | 3,18831       | 0,00143106 | 0,0105576  | yes |
| AN7797 | ChrIV_A_nidulans_FGSC_A4:2720288-2721416 | WT_5hasex | WT_veg | OK     | 22,7013  | 29,7174  | 0,388533      | -0,6947       | 0,487244   | 0,740807   | no  |
| AN7798 | ChrIV_A_nidulans_FGSC_A4:2722052-2723444 | WT_5hasex | WT_veg | OK     | 81,639   | 87,4401  | 0,0990363     | -0,195183     | 0,845249   | 0,938963   | no  |
| AN7799 | ChrIV_A_nidulans_FGSC_A4:2723929-2724697 | WT_5hasex | WT_veg | OK     | 39,5137  | 196,305  | 2,31268       | -4,40625      | 1,0518E-05 | 0,00015038 | yes |
| AN7801 | ChrIV_A_nidulans_FGSC_A4:2730504-2731491 | WT_5hasex | WT_veg | NOTEST | 1,0126   | 1,14911  | 0,182453      | -0,14031      | 0,888415   | 1          | no  |
| AN7809 | ChrIV_A_nidulans_FGSC_A4:2745573-2747209 | WT_5hasex | WT_veg | NOTEST | 0,112581 | 0        | -1.79769e+308 | -1.79769e+308 | 0,165569   | 1          | no  |
| AN7817 | ChrIV_A_nidulans_FGSC_A4:2768786-2770321 | WT_5hasex | WT_veg | NOTEST | 0,683709 | 2,87849  | 2,07386       | -1,98975      | 0,0466183  | 1          | no  |
| AN7819 | ChrIV_A_nidulans_FGSC_A4:2773071-2774354 | WT_5hasex | WT_veg | OK     | 1,49043  | 6,14724  | 2,04421       | -2,07737      | 0,0377672  | 0,144543   | no  |

## Supplementary table 1

|        |                                          |           |        |        |          |          |               |               |            |            |      |
|--------|------------------------------------------|-----------|--------|--------|----------|----------|---------------|---------------|------------|------------|------|
| AN7822 | ChrIV_A_nidulans_FGSC_A4:2777783-2778173 | WT_5hasex | WT_veg | OK     | 6,75695  | 7,76896  | 0,20135       | -0,191022     | 0,848509   | 0,94045    | no   |
| AN7826 | ChrIV_A_nidulans_FGSC_A4:2791289-2792610 | WT_5hasex | WT_veg | OK     | 12,8632  | 86,484   | 2,74918       | -4,60931      | 4,04E-06   | 6,3844E-05 | yes  |
| AN7827 | ChrIV_A_nidulans_FGSC_A4:2794764-2795742 | WT_5hasex | WT_veg | NOTEST | 0,596623 | 3,40758  | 2,51386       | -1,85045      | 0,0642493  |            | 1 no |
| AN7830 | ChrIV_A_nidulans_FGSC_A4:2802275-2803526 | WT_5hasex | WT_veg | OK     | 32,8716  | 80,3592  | 1,28962       | -2,56718      | 0,010253   | 0,0531329  | no   |
| AN7831 | ChrIV_A_nidulans_FGSC_A4:2806623-2807429 | WT_5hasex | WT_veg | OK     | 2,49633  | 3,84769  | 0,624183      | -0,581143     | 0,561144   | 0,789742   | no   |
| AN7832 | ChrIV_A_nidulans_FGSC_A4:2807782-2809787 | WT_5hasex | WT_veg | OK     | 8,62625  | 2,43635  | -1,82401      | 2,67487       | 0,00747576 | 0,0412928  | yes  |
| AN7833 | ChrIV_A_nidulans_FGSC_A4:2812255-2812792 | WT_5hasex | WT_veg | NOTEST | 1,73805  | 2,21655  | 0,350848      | -0,226179     | 0,821063   |            | 1 no |
| AN7834 | ChrIV_A_nidulans_FGSC_A4:2813369-2815817 | WT_5hasex | WT_veg | OK     | 4,42148  | 8,60106  | 0,959984      | -1,41167      | 0,158047   | 0,392382   | no   |
| AN7836 | ChrIV_A_nidulans_FGSC_A4:2821507-2822875 | WT_5hasex | WT_veg | OK     | 26,1377  | 15,5158  | -0,752395     | 1,42037       | 0,155501   | 0,388017   | no   |
| AN7839 | ChrIV_A_nidulans_FGSC_A4:2832750-2837949 | WT_5hasex | WT_veg | OK     | 11,331   | 29,5001  | 1,38044       | -2,41823      | 0,015596   | 0,0736405  | no   |
| AN7840 | ChrIV_A_nidulans_FGSC_A4:2845607-2846147 | WT_5hasex | WT_veg | NOTEST | 0        | 0        | 0             | 0             | 1          |            | 1 no |
| AN7842 | ChrIV_A_nidulans_FGSC_A4:2852440-2856857 | WT_5hasex | WT_veg | NOTEST | 0,281815 | 0,410039 | 0,541013      | -0,345091     | 0,730026   |            | 1 no |
| AN7845 | ChrIV_A_nidulans_FGSC_A4:2863055-2864976 | WT_5hasex | WT_veg | OK     | 2,17383  | 3,17813  | 0,547934      | -0,686449     | 0,49243    | 0,744444   | no   |
| AN7846 | ChrIV_A_nidulans_FGSC_A4:2865567-2866462 | WT_5hasex | WT_veg | NOTEST | 1,98806  | 2,88207  | 0,535743      | -0,474383     | 0,635227   |            | 1 no |
| AN7847 | ChrIV_A_nidulans_FGSC_A4:2868908-2871581 | WT_5hasex | WT_veg | OK     | 2,69953  | 2,14398  | -0,332412     | 0,390789      | 0,695954   | 0,867071   | no   |
| AN7848 | ChrIV_A_nidulans_FGSC_A4:2883778-2885390 | WT_5hasex | WT_veg | NOTEST | 0        | 0        | 0             | 0             | 1          |            | 1 no |
| AN7849 | ChrII_A_nidulans_FGSC_A4:5153-5901       | WT_5hasex | WT_veg | NOTEST | 0        | 0        | 0             | 0             | 1          |            | 1 no |
| AN7850 | ChrII_A_nidulans_FGSC_A4:7235-7821       | WT_5hasex | WT_veg | OK     | 7,39821  | 12,7041  | 0,780048      | -1,0413       | 0,297739   | 0,572933   | no   |
| AN7851 | ChrII_A_nidulans_FGSC_A4:8845-9614       | WT_5hasex | WT_veg | NOTEST | 1,3236   | 1,26351  | -0,0670326    | 0,0445919     | 0,964433   |            | 1 no |
| AN7852 | ChrII_A_nidulans_FGSC_A4:11599-13372     | WT_5hasex | WT_veg | NOTEST | 0        | 0        | 0             | 0             | 1          |            | 1 no |
| AN7853 | ChrII_A_nidulans_FGSC_A4:13670-14418     | WT_5hasex | WT_veg | NOTEST | 0        | 0        | 0             | 0             | 1          |            | 1 no |
| AN7854 | ChrII_A_nidulans_FGSC_A4:17198-17968     | WT_5hasex | WT_veg | NOTEST | 0        | 0        | 0             | 0             | 1          |            | 1 no |
| AN7855 | ChrII_A_nidulans_FGSC_A4:18409-21641     | WT_5hasex | WT_veg | OK     | 4,01086  | 1,37513  | -1,54434      | 1,61917       | 0,10541    | 0,300479   | no   |
| AN7856 | ChrII_A_nidulans_FGSC_A4:22130-23932     | WT_5hasex | WT_veg | OK     | 5,96558  | 3,05631  | -0,964871     | 1,33537       | 0,181755   | 0,428733   | no   |
| AN7857 | ChrII_A_nidulans_FGSC_A4:25425-26361     | WT_5hasex | WT_veg | NOTEST | 0,992445 | 0,204558 | -2,27848      | 0,754876      | 0,450323   |            | 1 no |
| AN7858 | ChrII_A_nidulans_FGSC_A4:27192-28594     | WT_5hasex | WT_veg | NOTEST | 0,819416 | 1,89372  | 1,20855       | -1,07094      | 0,284198   |            | 1 no |
| AN7859 | ChrII_A_nidulans_FGSC_A4:31153-33678     | WT_5hasex | WT_veg | NOTEST | 0,275832 | 0,330829 | 0,262295      | -0,159115     | 0,873578   |            | 1 no |
| AN7860 | ChrII_A_nidulans_FGSC_A4:34560-36636     | WT_5hasex | WT_veg | NOTEST | 1,27897  | 0,323245 | -1,98428      | 1,33951       | 0,180404   |            | 1 no |
| AN7861 | ChrII_A_nidulans_FGSC_A4:41344-42024     | WT_5hasex | WT_veg | NOTEST | 0,781782 | 0        | -1.79769e+308 | -1.79769e+308 | 0,133588   |            | 1 no |
| AN7862 | ChrII_A_nidulans_FGSC_A4:43093-43655     | WT_5hasex | WT_veg | NOTEST | 0        | 0        | 0             | 0             | 1          |            | 1 no |
| AN7863 | ChrII_A_nidulans_FGSC_A4:45710-48033     | WT_5hasex | WT_veg | NOTEST | 0        | 0        | 0             | 0             | 1          |            | 1 no |
| AN7866 | ChrII_A_nidulans_FGSC_A4:57941-59689     | WT_5hasex | WT_veg | OK     | 6,42442  | 0,906768 | -2,82476      | 2,80321       | 0,00505959 | 0,0300298  | yes  |
| AN7867 | ChrII_A_nidulans_FGSC_A4:60243-62529     | WT_5hasex | WT_veg | OK     | 4,96984  | 0,923636 | -2,4278       | 2,56361       | 0,010359   | 0,0535653  | no   |
| AN7868 | ChrII_A_nidulans_FGSC_A4:62845-63988     | WT_5hasex | WT_veg | NOTEST | 0,19622  | 0        | -1.79769e+308 | -1.79769e+308 | 0,165569   |            | 1 no |
| AN7869 | ChrII_A_nidulans_FGSC_A4:65124-68303     | WT_5hasex | WT_veg | NOTEST | 0,530594 | 1,12651  | 1,08619       | -1,05662      | 0,290687   |            | 1 no |
| AN7870 | ChrII_A_nidulans_FGSC_A4:69377-70915     | WT_5hasex | WT_veg | OK     | 8,53984  | 1,15274  | -2,88914      | 2,96893       | 0,00298842 | 0,0194896  | yes  |
| AN7871 | ChrII_A_nidulans_FGSC_A4:71895-72807     | WT_5hasex | WT_veg | NOTEST | 0        | 0,248715 | 1.79769e+308  | 1.79769e+308  | 0,309884   |            | 1 no |
| AN7872 | ChrII_A_nidulans_FGSC_A4:74782-76663     | WT_5hasex | WT_veg | OK     | 13,5298  | 23,8574  | 0,818296      | -1,51324      | 0,130218   | 0,345678   | no   |
| AN7873 | ChrII_A_nidulans_FGSC_A4:81980-88480     | WT_5hasex | WT_veg | OK     | 3,00189  | 7,45771  | 1,31286       | -2,34877      | 0,0188353  | 0,0849989  | no   |
| AN7874 | ChrII_A_nidulans_FGSC_A4:89354-90365     | WT_5hasex | WT_veg | OK     | 2,40057  | 13,2392  | 2,46336       | -3,10558      | 0,00189903 | 0,0133628  | yes  |
| AN7875 | ChrII_A_nidulans_FGSC_A4:90611-91135     | WT_5hasex | WT_veg | NOTEST | 0,563699 | 0        | -1.79769e+308 | -1.79769e+308 | 0,23809    |            | 1 no |
| AN7876 | ChrII_A_nidulans_FGSC_A4:91759-93086     | WT_5hasex | WT_veg | NOTEST | 0,426175 | 2,17245  | 2,3498        | -1,72644      | 0,0842674  |            | 1 no |
| AN7877 | ChrII_A_nidulans_FGSC_A4:93314-94619     | WT_5hasex | WT_veg | OK     | 34,2373  | 96,5443  | 1,49562       | -2,97482      | 0,00293156 | 0,0191781  | yes  |
| AN7878 | ChrII_A_nidulans_FGSC_A4:95170-96407     | WT_5hasex | WT_veg | OK     | 1,74147  | 5,14651  | 1,56329       | -1,89755      | 0,0577548  | 0,196562   | no   |
| AN7879 | ChrII_A_nidulans_FGSC_A4:96717-101816    | WT_5hasex | WT_veg | NOTEST | 0,473353 | 1,33819  | 1,49929       | -1,8689       | 0,0616369  |            | 1 no |
| AN7880 | ChrII_A_nidulans_FGSC_A4:102917-108494   | WT_5hasex | WT_veg | NOTEST | 0,238847 | 0,621516 | 1,37971       | -1,42274      | 0,154811   |            | 1 no |
| AN7883 | ChrII_A_nidulans_FGSC_A4:115973-116675   | WT_5hasex | WT_veg | NOTEST | 0,46545  | 2,38876  | 2,35956       | -1,04766      | 0,294796   |            | 1 no |
| AN7884 | ChrII_A_nidulans_FGSC_A4:118327-139717   | WT_5hasex | WT_veg | NOTEST | 0,956073 | 0,235559 | -2,02103      | 3,13753       | 0,00170376 |            | 1 no |
| AN7885 | ChrII_A_nidulans_FGSC_A4:140526-141116   | WT_5hasex | WT_veg | NOTEST | 0        | 0        | 0             | 0             | 1          |            | 1 no |
| AN7886 | ChrII_A_nidulans_FGSC_A4:143925-144552   | WT_5hasex | WT_veg | NOTEST | 0,47107  | 0        | -1.79769e+308 | -1.79769e+308 | 0,224063   |            | 1 no |
| AN7887 | ChrII_A_nidulans_FGSC_A4:145540-146283   | WT_5hasex | WT_veg | NOTEST | 1,20079  | 0        | -1.79769e+308 | -1.79769e+308 | 0,0649158  |            | 1 no |
| AN7888 | ChrII_A_nidulans_FGSC_A4:147609-148575   | WT_5hasex | WT_veg | OK     | 3,10241  | 1,9339   | -0,681875     | 0,685165      | 0,49324    | 0,744906   | no   |
| AN7889 | ChrII_A_nidulans_FGSC_A4:151697-154524   | WT_5hasex | WT_veg | OK     | 44,5569  | 135,068  | 1,59996       | -3,22974      | 0,00123904 | 0,00936374 | yes  |

# Supplementary table 1

|        |                                        |           |        |        |          |          |               |               |            |            |     |
|--------|----------------------------------------|-----------|--------|--------|----------|----------|---------------|---------------|------------|------------|-----|
| AN7890 | ChrII_A_nidulans_FGSC_A4:151697-154524 | WT_5hasex | WT_veg | OK     | 12,3683  | 32,5909  | 1,39783       | -2,34304      | 0,0191274  | 0,0860209  | no  |
| AN7891 | ChrII_A_nidulans_FGSC_A4:156779-158388 | WT_5hasex | WT_veg | OK     | 13,9495  | 0,732813 | -4,25062      | 3,1502        | 0,00163158 | 0,0117847  | yes |
| AN7892 | ChrII_A_nidulans_FGSC_A4:158620-159614 | WT_5hasex | WT_veg | OK     | 1036,27  | 2258,65  | 1,12407       | -1,73522      | 0,0827015  | 0,253729   | no  |
| AN7893 | ChrII_A_nidulans_FGSC_A4:163722-164821 | WT_5hasex | WT_veg | OK     | 10,1158  | 2,54637  | -1,9901       | 2,3403        | 0,0192683  | 0,0864764  | no  |
| AN7894 | ChrII_A_nidulans_FGSC_A4:165555-165888 | WT_5hasex | WT_veg | OK     | 27,5425  | 12,1604  | -1,17947      | 1,52782       | 0,126557   | 0,339059   | no  |
| AN7896 | ChrII_A_nidulans_FGSC_A4:171086-173141 | WT_5hasex | WT_veg | OK     | 6,37709  | 2,75756  | -1,20951      | 1,72058       | 0,0853272  | 0,259372   | no  |
| AN7897 | ChrII_A_nidulans_FGSC_A4:173426-174707 | WT_5hasex | WT_veg | OK     | 3,79333  | 0,695779 | -2,44677      | 1,74109       | 0,0816681  | 0,25127    | no  |
| AN7898 | ChrII_A_nidulans_FGSC_A4:175939-177310 | WT_5hasex | WT_veg | OK     | 6,75941  | 0,312821 | -4,43349      | 2,83193       | 0,00462676 | 0,0279451  | yes |
| AN7899 | ChrII_A_nidulans_FGSC_A4:178094-178931 | WT_5hasex | WT_veg | OK     | 4,99076  | 1,75611  | -1,50688      | 1,42592       | 0,153891   | 0,38546    | no  |
| AN7900 | ChrII_A_nidulans_FGSC_A4:179190-180632 | WT_5hasex | WT_veg | OK     | 1,97524  | 0        | -1.79769e+308 | -1.79769e+308 | 0,0171341  | 0,0792463  | no  |
| AN7901 | ChrII_A_nidulans_FGSC_A4:182132-183536 | WT_5hasex | WT_veg | OK     | 2,01309  | 1,9411   | -0,0525389    | 0,0555945     | 0,955665   | 0,983556   | no  |
| AN7902 | ChrII_A_nidulans_FGSC_A4:183793-185246 | WT_5hasex | WT_veg | OK     | 4,21773  | 1,7605   | -1,26048      | 1,37386       | 0,169486   | 0,409887   | no  |
| AN7903 | ChrII_A_nidulans_FGSC_A4:186498-194381 | WT_5hasex | WT_veg | NOTEST | 0,402043 | 0,109003 | -1,88298      | 1,29829       | 0,194188   | 1          | no  |
| AN7904 | ChrII_A_nidulans_FGSC_A4:195663-196335 | WT_5hasex | WT_veg | OK     | 40,4256  | 36,611   | -0,142991     | 0,25422       | 0,799326   | 0,919005   | no  |
| AN7905 | ChrII_A_nidulans_FGSC_A4:197486-198368 | WT_5hasex | WT_veg | NOTEST | 1,36582  | 0,951894 | -0,520896     | 0,333427      | 0,738812   | 1          | no  |
| AN7906 | ChrII_A_nidulans_FGSC_A4:201029-201832 | WT_5hasex | WT_veg | NOTEST | 0,493171 | 1,36343  | 1,46708       | -0,807877     | 0,419162   | 1          | no  |
| AN7907 | ChrII_A_nidulans_FGSC_A4:202292-202844 | WT_5hasex | WT_veg | OK     | 3,36474  | 5,00867  | 0,57393       | -0,534434     | 0,593042   | 0,80878    | no  |
| AN7913 | ChrII_A_nidulans_FGSC_A4:219024-220864 | WT_5hasex | WT_veg | OK     | 15,4699  | 45,7799  | 1,56525       | -2,85402      | 0,00431695 | 0,0264241  | yes |
| AN7914 | ChrII_A_nidulans_FGSC_A4:220999-222186 | WT_5hasex | WT_veg | OK     | 7,01398  | 22,0598  | 1,65312       | -2,54042      | 0,0110718  | 0,0564547  | no  |
| AN7916 | ChrII_A_nidulans_FGSC_A4:226925-228844 | WT_5hasex | WT_veg | NOTEST | 1,18908  | 0,554407 | -1,10083      | 0,741663      | 0,458292   | 1          | no  |
| AN7917 | ChrII_A_nidulans_FGSC_A4:229457-231020 | WT_5hasex | WT_veg | OK     | 8,81987  | 16,4272  | 0,897256      | -1,34671      | 0,178074   | 0,423194   | no  |
| AN7918 | ChrII_A_nidulans_FGSC_A4:231521-232250 | WT_5hasex | WT_veg | OK     | 9,76142  | 23,1763  | 1,24748       | -1,71474      | 0,0863926  | 0,261776   | no  |
| AN7919 | ChrII_A_nidulans_FGSC_A4:232289-234920 | WT_5hasex | WT_veg | OK     | 1,01504  | 4,67194  | 2,20249       | -2,68845      | 0,00717842 | 0,0399397  | yes |
| AN7920 | ChrII_A_nidulans_FGSC_A4:235551-236628 | WT_5hasex | WT_veg | OK     | 3,74755  | 9,67686  | 1,36859       | -1,78489      | 0,0742792  | 0,234962   | no  |
| AN7921 | ChrII_A_nidulans_FGSC_A4:239283-241568 | WT_5hasex | WT_veg | OK     | 14,7444  | 13,216   | -0,157875     | 0,292043      | 0,770254   | 0,905596   | no  |
| AN7922 | ChrII_A_nidulans_FGSC_A4:241587-242503 | WT_5hasex | WT_veg | OK     | 14,5786  | 14,4032  | -0,017464     | 0,0278379     | 0,977791   | 0,992277   | no  |
| AN7923 | ChrII_A_nidulans_FGSC_A4:242820-243972 | WT_5hasex | WT_veg | OK     | 11,3245  | 16,4031  | 0,534523      | -0,881036     | 0,378298   | 0,652799   | no  |
| AN7924 | ChrII_A_nidulans_FGSC_A4:244425-245099 | WT_5hasex | WT_veg | OK     | 8,02054  | 26,1483  | 1,70495       | -2,39251      | 0,0167337  | 0,0778342  | no  |
| AN7925 | ChrII_A_nidulans_FGSC_A4:246188-246967 | WT_5hasex | WT_veg | OK     | 37,6508  | 55,2132  | 0,552334      | -1,01051      | 0,312252   | 0,588521   | no  |
| AN7926 | ChrII_A_nidulans_FGSC_A4:247533-248601 | WT_5hasex | WT_veg | OK     | 0,842535 | 3,93086  | 2,22204       | -2,25106      | 0,0243815  | 0,103402   | no  |
| AN7927 | ChrII_A_nidulans_FGSC_A4:249139-250033 | WT_5hasex | WT_veg | OK     | 0,712604 | 5,80684  | 3,02658       | -2,50729      | 0,012166   | 0,0608149  | no  |
| AN7928 | ChrII_A_nidulans_FGSC_A4:250292-254873 | WT_5hasex | WT_veg | NOTEST | 0,183555 | 0        | -1.79769e+308 | -1.79769e+308 | 0,0600506  | 1          | no  |
| AN7929 | ChrII_A_nidulans_FGSC_A4:255232-256267 | WT_5hasex | WT_veg | NOTEST | 0        | 0,848789 | 1.79769e+308  | 1.79769e+308  | 0,123323   | 1          | no  |
| AN7930 | ChrII_A_nidulans_FGSC_A4:256544-257720 | WT_5hasex | WT_veg | NOTEST | 0        | 0        | 0             | 0             | 1          | 1          | no  |
| AN7933 | ChrII_A_nidulans_FGSC_A4:263586-264644 | WT_5hasex | WT_veg | NOTEST | 0,400594 | 0,824435 | 1,04126       | -0,601752     | 0,547339   | 1          | no  |
| AN7934 | ChrII_A_nidulans_FGSC_A4:265056-266224 | WT_5hasex | WT_veg | OK     | 6,42498  | 6,64129  | 0,047772      | -0,061244     | 0,951165   | 0,982048   | no  |
| AN7935 | ChrII_A_nidulans_FGSC_A4:266513-267645 | WT_5hasex | WT_veg | OK     | 15,2749  | 15,8771  | 0,0557777     | -0,0923424    | 0,926426   | 0,972068   | no  |
| AN7936 | ChrII_A_nidulans_FGSC_A4:268390-269956 | WT_5hasex | WT_veg | OK     | 43,6069  | 83,3861  | 0,93525       | -1,853        | 0,0638825  | 0,21122    | no  |
| AN7938 | ChrII_A_nidulans_FGSC_A4:273686-275651 | WT_5hasex | WT_veg | NOTEST | 0,485769 | 0,375135 | -0,37286      | 0,227804      | 0,819798   | 1          | no  |
| AN7939 | ChrII_A_nidulans_FGSC_A4:277013-278511 | WT_5hasex | WT_veg | OK     | 0,59358  | 5,55102  | 3,22524       | -2,94788      | 0,00319965 | 0,0206259  | yes |
| AN7940 | ChrII_A_nidulans_FGSC_A4:279721-281243 | WT_5hasex | WT_veg | NOTEST | 0        | 0,733264 | 1.79769e+308  | 1.79769e+308  | 0,123323   | 1          | no  |
| AN7941 | ChrII_A_nidulans_FGSC_A4:283305-283848 | WT_5hasex | WT_veg | OK     | 2,57893  | 7,58664  | 1,55669       | -1,72122      | 0,085211   | 0,259157   | no  |
| AN7942 | ChrII_A_nidulans_FGSC_A4:284171-285774 | WT_5hasex | WT_veg | OK     | 4,27258  | 8,76387  | 1,03646       | -1,52437      | 0,127415   | 0,340636   | no  |
| AN7943 | ChrII_A_nidulans_FGSC_A4:287241-288296 | WT_5hasex | WT_veg | OK     | 2,92342  | 1,86052  | -0,651949     | 0,649534      | 0,515993   | 0,760314   | no  |
| AN7944 | ChrII_A_nidulans_FGSC_A4:291772-292867 | WT_5hasex | WT_veg | OK     | 62,1706  | 544,499  | 3,13062       | -6,10922      | 1,0012E-09 | 3,5424E-08 | yes |
| AN7946 | ChrII_A_nidulans_FGSC_A4:297654-298529 | WT_5hasex | WT_veg | NOTEST | 0,920566 | 1,22117  | 0,407677      | -0,308039     | 0,758053   | 1          | no  |
| AN7947 | ChrII_A_nidulans_FGSC_A4:299535-300980 | WT_5hasex | WT_veg | NOTEST | 0        | 0        | 0             | 0             | 1          | 1          | no  |
| AN7948 | ChrII_A_nidulans_FGSC_A4:302108-303974 | WT_5hasex | WT_veg | NOTEST | 0        | 0        | 0             | 0             | 1          | 1          | no  |
| AN7949 | ChrII_A_nidulans_FGSC_A4:304446-307034 | WT_5hasex | WT_veg | OK     | 7,0882   | 5,71726  | -0,310096     | 0,523381      | 0,600709   | 0,813641   | no  |
| AN7951 | ChrII_A_nidulans_FGSC_A4:310558-312729 | WT_5hasex | WT_veg | OK     | 16,5315  | 38,0924  | 1,20429       | -2,25195      | 0,0243252  | 0,103214   | no  |
| AN7952 | ChrII_A_nidulans_FGSC_A4:312818-315849 | WT_5hasex | WT_veg | OK     | 4,43552  | 7,9698   | 0,84544       | -1,20236      | 0,229226   | 0,492377   | no  |
| AN7953 | ChrII_A_nidulans_FGSC_A4:316179-317243 | WT_5hasex | WT_veg | OK     | 4,41247  | 37,9779  | 3,1055        | -4,05747      | 4,9607E-05 | 0,00059403 | yes |
| AN7954 | ChrII_A_nidulans_FGSC_A4:317490-318640 | WT_5hasex | WT_veg | OK     | 0,78813  | 21,1459  | 4,7458        | -4,66167      | 3,1365E-06 | 5,1218E-05 | yes |

## Supplementary table 1

|        |                                        |           |        |        |          |          |               |               |            |            |     |    |
|--------|----------------------------------------|-----------|--------|--------|----------|----------|---------------|---------------|------------|------------|-----|----|
| AN7956 | ChrII_A_nidulans_FGSC_A4:322664-323925 | WT_5hasex | WT_veg | NOTEST | 0        | 0        | 0             | 0             | 1          | 1          | no  |    |
| AN7957 | ChrII_A_nidulans_FGSC_A4:325298-326182 | WT_5hasex | WT_veg | NOTEST | 0        | 0        | 0             | 0             | 1          | 1          | no  |    |
| AN7958 | ChrII_A_nidulans_FGSC_A4:326282-328205 | WT_5hasex | WT_veg | NOTEST | 0,340178 | 0        | -1.79769e+308 | -1.79769e+308 | 0,107729   | 0          | 1   | no |
| AN7959 | ChrII_A_nidulans_FGSC_A4:329446-330265 | WT_5hasex | WT_veg | OK     | 7,0503   | 82,6055  | 3,55048       | -4,53389      | 5,7907E-06 | 8,8313E-05 | yes |    |
| AN7960 | ChrII_A_nidulans_FGSC_A4:330642-331047 | WT_5hasex | WT_veg | OK     | 18,5286  | 358,776  | 4,27526       | -5,66015      | 1,5124E-08 | 4,2067E-07 | yes |    |
| AN7961 | ChrII_A_nidulans_FGSC_A4:331363-331915 | WT_5hasex | WT_veg | OK     | 21,6505  | 47,923   | 1,14632       | -1,55906      | 0,118982   | 0,32587    | no  |    |
| AN7963 | ChrII_A_nidulans_FGSC_A4:334712-335110 | WT_5hasex | WT_veg | NOTEST | 0        | 0        | 0             | 0             | 1          | 1          | no  |    |
| AN7964 | ChrII_A_nidulans_FGSC_A4:336366-338123 | WT_5hasex | WT_veg | NOTEST | 0        | 0        | 0             | 0             | 1          | 1          | no  |    |
| AN7965 | ChrII_A_nidulans_FGSC_A4:338930-339777 | WT_5hasex | WT_veg | NOTEST | 0,533067 | 0        | -1.79769e+308 | -1.79769e+308 | 0,224063   | 0          | 1   | no |
| AN7966 | ChrII_A_nidulans_FGSC_A4:341508-342985 | WT_5hasex | WT_veg | NOTEST | 0,165238 | 0        | -1.79769e+308 | -1.79769e+308 | 0,165569   | 0          | 1   | no |
| AN7967 | ChrII_A_nidulans_FGSC_A4:343790-345717 | WT_5hasex | WT_veg | OK     | 4,57556  | 15,72    | 1,78058       | -2,24184      | 0,0249716  | 0,105326   | no  |    |
| AN7968 | ChrII_A_nidulans_FGSC_A4:347107-347787 | WT_5hasex | WT_veg | OK     | 1,44097  | 11,7949  | 3,03305       | -2,8935       | 0,00380972 | 0,0238561  | yes |    |
| AN7970 | ChrII_A_nidulans_FGSC_A4:353207-354689 | WT_5hasex | WT_veg | NOTEST | 0,474053 | 0,853626 | 0,848556      | -0,659191     | 0,509773   | 1          | no  |    |
| AN7971 | ChrII_A_nidulans_FGSC_A4:357624-359930 | WT_5hasex | WT_veg | OK     | 16,0937  | 51,6935  | 1,68348       | -3,26914      | 0,00107875 | 0,00836469 | yes |    |
| AN7972 | ChrII_A_nidulans_FGSC_A4:360351-362004 | WT_5hasex | WT_veg | OK     | 2,80276  | 1,50093  | -0,900993     | 0,986873      | 0,323705   | 0,600112   | no  |    |
| AN7973 | ChrII_A_nidulans_FGSC_A4:366387-367498 | WT_5hasex | WT_veg | NOTEST | 0,763357 | 0        | -1.79769e+308 | -1.79769e+308 | 0,0511169  | 0          | 1   | no |
| AN7974 | ChrII_A_nidulans_FGSC_A4:367966-368486 | WT_5hasex | WT_veg | OK     | 2,64611  | 0        | -1.79769e+308 | -1.79769e+308 | 0,0540986  | 0,187566   | no  |    |
| AN7975 | ChrII_A_nidulans_FGSC_A4:370793-372199 | WT_5hasex | WT_veg | OK     | 11,6676  | 22,1415  | 0,924248      | -1,55611      | 0,119682   | 0,327203   | no  |    |
| AN7976 | ChrII_A_nidulans_FGSC_A4:375040-375883 | WT_5hasex | WT_veg | OK     | 7,7223   | 22,073   | 1,51518       | -2,25309      | 0,0242537  | 0,102994   | no  |    |
| AN7977 | ChrII_A_nidulans_FGSC_A4:376117-377667 | WT_5hasex | WT_veg | OK     | 1,08331  | 5,20878  | 2,2655        | -2,45252      | 0,0141858  | 0,068513   | no  |    |
| AN7979 | ChrII_A_nidulans_FGSC_A4:383279-383657 | WT_5hasex | WT_veg | NOTEST | 0        | 0        | 0             | 0             | 1          | 1          | no  |    |
| AN7980 | ChrII_A_nidulans_FGSC_A4:386529-386756 | WT_5hasex | WT_veg | NOTEST | 0        | 0        | 0             | 0             | 1          | 1          | no  |    |
| AN7981 | ChrII_A_nidulans_FGSC_A4:389572-391983 | WT_5hasex | WT_veg | NOTEST | 0,335597 | 0        | -1.79769e+308 | -1.79769e+308 | 0,107729   | 0          | 1   | no |
| AN7982 | ChrII_A_nidulans_FGSC_A4:392906-393618 | WT_5hasex | WT_veg | NOTEST | 0        | 0        | 0             | 0             | 1          | 1          | no  |    |
| AN7983 | ChrII_A_nidulans_FGSC_A4:394178-395880 | WT_5hasex | WT_veg | NOTEST | 0        | 0        | 0             | 0             | 1          | 1          | no  |    |
| AN7984 | ChrII_A_nidulans_FGSC_A4:397431-399244 | WT_5hasex | WT_veg | NOTEST | 0,465707 | 0,121534 | -1,93807      | 0,636958      | 0,524152   | 0          | 1   | no |
| AN7985 | ChrII_A_nidulans_FGSC_A4:399733-401419 | WT_5hasex | WT_veg | NOTEST | 0,917079 | 2,84007  | 1,63081       | -1,6197       | 0,105297   | 1          | no  |    |
| AN7986 | ChrII_A_nidulans_FGSC_A4:401566-405557 | WT_5hasex | WT_veg | NOTEST | 0,751952 | 2,11247  | 1,49022       | -1,9113       | 0,0559655  | 0          | 1   | no |
| AN7987 | ChrII_A_nidulans_FGSC_A4:408004-409325 | WT_5hasex | WT_veg | OK     | 20,3049  | 18,0382  | -0,170776     | 0,305005      | 0,760362   | 0,900889   | no  |    |
| AN7988 | ChrII_A_nidulans_FGSC_A4:420817-421564 | WT_5hasex | WT_veg | NOTEST | 1,46224  | 2,28249  | 0,64243       | -0,53493      | 0,592698   | 1          | no  |    |
| AN7989 | ChrII_A_nidulans_FGSC_A4:421741-423187 | WT_5hasex | WT_veg | OK     | 37,6574  | 244,897  | 2,70117       | -5,5071       | 3,6479E-08 | 9,3521E-07 | yes |    |
| AN7990 | ChrII_A_nidulans_FGSC_A4:423412-424040 | WT_5hasex | WT_veg | OK     | 70,5654  | 106,248  | 0,590406      | -1,08371      | 0,278493   | 0,551721   | no  |    |
| AN7991 | ChrII_A_nidulans_FGSC_A4:425588-426851 | WT_5hasex | WT_veg | NOTEST | 0        | 0        | 0             | 0             | 1          | 1          | no  |    |
| AN7992 | ChrII_A_nidulans_FGSC_A4:427960-428615 | WT_5hasex | WT_veg | OK     | 1336,67  | 6630,47  | 2,31047       | -3,74241      | 0,00018226 | 0,00184168 | yes |    |
| AN7993 | ChrII_A_nidulans_FGSC_A4:428686-431968 | WT_5hasex | WT_veg | OK     | 22,7286  | 24,1831  | 0,089492      | -0,181724     | 0,8558     | 0,943704   | no  |    |
| AN7994 | ChrII_A_nidulans_FGSC_A4:432458-434720 | WT_5hasex | WT_veg | OK     | 13,2465  | 37,491   | 1,50093       | -2,85262      | 0,00433598 | 0,0265237  | yes |    |
| AN7995 | ChrII_A_nidulans_FGSC_A4:435286-436557 | WT_5hasex | WT_veg | OK     | 13,227   | 21,8804  | 0,72615       | -1,25435      | 0,209717   | 0,46772    | no  |    |
| AN7996 | ChrII_A_nidulans_FGSC_A4:438381-439448 | WT_5hasex | WT_veg | OK     | 23,3915  | 58,8353  | 1,3307        | -2,34661      | 0,0189449  | 0,0854017  | no  |    |
| AN7997 | ChrII_A_nidulans_FGSC_A4:439778-441748 | WT_5hasex | WT_veg | OK     | 5,55089  | 12,9123  | 1,21795       | -1,88782      | 0,0590502  | 0,199984   | no  |    |
| AN7998 | ChrII_A_nidulans_FGSC_A4:442841-445017 | WT_5hasex | WT_veg | OK     | 19,4646  | 38,4639  | 0,982653      | -1,89517      | 0,0580693  | 0,197389   | no  |    |
| AN7999 | ChrII_A_nidulans_FGSC_A4:445254-446238 | WT_5hasex | WT_veg | OK     | 6,62028  | 9,41039  | 0,507363      | -0,65028      | 0,515512   | 0,760032   | no  |    |
| AN8000 | ChrII_A_nidulans_FGSC_A4:453970-466058 | WT_5hasex | WT_veg | OK     | 8,72299  | 21,0257  | 1,26926       | -2,61779      | 0,00885004 | 0,0473321  | yes |    |
| AN8001 | ChrII_A_nidulans_FGSC_A4:466111-467003 | WT_5hasex | WT_veg | OK     | 46,1563  | 95,9465  | 1,0557        | -2,11208      | 0,0346797  | 0,13579    | no  |    |
| AN8002 | ChrII_A_nidulans_FGSC_A4:467603-469926 | WT_5hasex | WT_veg | OK     | 16,0591  | 23,3076  | 0,537407      | -1,03862      | 0,29898    | 0,574329   | no  |    |
| AN8003 | ChrII_A_nidulans_FGSC_A4:470860-472315 | WT_5hasex | WT_veg | OK     | 30,292   | 40,4523  | 0,417284      | -0,826663     | 0,408428   | 0,678538   | no  |    |
| AN8005 | ChrII_A_nidulans_FGSC_A4:478018-478798 | WT_5hasex | WT_veg | OK     | 7,3616   | 6,78306  | -0,118085     | 0,158303      | 0,874218   | 0,951853   | no  |    |
| AN8008 | ChrII_A_nidulans_FGSC_A4:486390-487809 | WT_5hasex | WT_veg | OK     | 9,57488  | 12,1196  | 0,340012      | -0,517811     | 0,60459    | 0,816146   | no  |    |
| AN8010 | ChrII_A_nidulans_FGSC_A4:489880-492602 | WT_5hasex | WT_veg | OK     | 202,082  | 704,35   | 1,80135       | -3,16362      | 0,00155822 | 0,0113442  | yes |    |
| AN8011 | ChrII_A_nidulans_FGSC_A4:496481-497086 | WT_5hasex | WT_veg | OK     | 4,0268   | 11,7418  | 1,54394       | -1,7509       | 0,0799628  | 0,247751   | no  |    |
| AN8012 | ChrII_A_nidulans_FGSC_A4:497507-498703 | WT_5hasex | WT_veg | OK     | 154,936  | 98,0828  | -0,659604     | 1,35038       | 0,176894   | 0,421766   | no  |    |
| AN8013 | ChrII_A_nidulans_FGSC_A4:499050-501222 | WT_5hasex | WT_veg | OK     | 17,823   | 34,1428  | 0,937839      | -1,80102      | 0,0717002  | 0,229337   | no  |    |
| AN8014 | ChrII_A_nidulans_FGSC_A4:501978-504802 | WT_5hasex | WT_veg | OK     | 9,37061  | 24,2982  | 1,37464       | -2,53047      | 0,0113909  | 0,0577392  | no  |    |
| AN8015 | ChrII_A_nidulans_FGSC_A4:505391-507012 | WT_5hasex | WT_veg | OK     | 31,5343  | 71,7174  | 1,1854        | -2,39657      | 0,0165492  | 0,0771404  | no  |    |

## Supplementary table 1

|        |                                        |           |        |        |           |          |            |            |            |            |     |
|--------|----------------------------------------|-----------|--------|--------|-----------|----------|------------|------------|------------|------------|-----|
| AN8017 | ChrII_A_nidulans_FGSC_A4:509700-512691 | WT_5hasex | WT_veg | OK     | 28,5727   | 53,0509  | 0,892738   | -1,82174   | 0,0684946  | 0,222094   | no  |
| AN8018 | ChrII_A_nidulans_FGSC_A4:514411-515988 | WT_5hasex | WT_veg | OK     | 48,0143   | 147,202  | 1,61627    | -3,20616   | 0,00134517 | 0,0100385  | yes |
| AN8019 | ChrII_A_nidulans_FGSC_A4:516954-521283 | WT_5hasex | WT_veg | OK     | 22,954    | 20,8485  | -0,138798  | 0,28672    | 0,774327   | 0,907574   | no  |
| AN8020 | ChrII_A_nidulans_FGSC_A4:521355-522879 | WT_5hasex | WT_veg | OK     | 6,90631   | 8,5707   | 0,311499   | -0,470983  | 0,637653   | 0,834647   | no  |
| AN8022 | ChrII_A_nidulans_FGSC_A4:525756-526222 | WT_5hasex | WT_veg | OK     | 112,179   | 254,627  | 1,18259    | -2,32999   | 0,0198067  | 0,0884685  | no  |
| AN8024 | ChrII_A_nidulans_FGSC_A4:530037-531140 | WT_5hasex | WT_veg | OK     | 18,5133   | 33,0255  | 0,835022   | -1,43447   | 0,151437   | 0,38136    | no  |
| AN8025 | ChrII_A_nidulans_FGSC_A4:531343-532667 | WT_5hasex | WT_veg | OK     | 6,96559   | 21,6156  | 1,63376    | -2,53952   | 0,0111005  | 0,0565681  | no  |
| AN8026 | ChrII_A_nidulans_FGSC_A4:533557-535352 | WT_5hasex | WT_veg | OK     | 1,57415   | 4,06777  | 1,36967    | -1,68053   | 0,0928536  | 0,274977   | no  |
| AN8027 | ChrII_A_nidulans_FGSC_A4:536983-538823 | WT_5hasex | WT_veg | NOTEST | 0,0987505 | 0,460411 | 2,22106    | -1,14626   | 0,251686   | 1          | no  |
| AN8028 | ChrII_A_nidulans_FGSC_A4:539979-541213 | WT_5hasex | WT_veg | OK     | 35,3528   | 73,825   | 1,06229    | -2,02853   | 0,0425062  | 0,157693   | no  |
| AN8030 | ChrII_A_nidulans_FGSC_A4:545562-546360 | WT_5hasex | WT_veg | OK     | 15,9046   | 16,3275  | 0,037859   | -0,0579965 | 0,953751   | 0,982764   | no  |
| AN8031 | ChrII_A_nidulans_FGSC_A4:547886-550448 | WT_5hasex | WT_veg | OK     | 20,9215   | 70,8587  | 1,75996    | -3,61903   | 0,00029571 | 0,00278748 | yes |
| AN8032 | ChrII_A_nidulans_FGSC_A4:551775-552842 | WT_5hasex | WT_veg | OK     | 227,526   | 718,61   | 1,65918    | -3,37637   | 0,00073449 | 0,00603269 | yes |
| AN8034 | ChrII_A_nidulans_FGSC_A4:559069-561264 | WT_5hasex | WT_veg | OK     | 32,7025   | 58,2782  | 0,833555   | -1,73359   | 0,082991   | 0,254381   | no  |
| AN8036 | ChrII_A_nidulans_FGSC_A4:565128-566111 | WT_5hasex | WT_veg | OK     | 127,887   | 179,514  | 0,489231   | -1,00496   | 0,314918   | 0,591091   | no  |
| AN8037 | ChrII_A_nidulans_FGSC_A4:567037-568460 | WT_5hasex | WT_veg | OK     | 41,9059   | 11,0049  | -1,92901   | 3,03864    | 0,00237645 | 0,0161226  | yes |
| AN8038 | ChrII_A_nidulans_FGSC_A4:572419-574348 | WT_5hasex | WT_veg | OK     | 49,2454   | 127,925  | 1,77724    | -2,88209   | 0,00395042 | 0,0245447  | yes |
| AN8040 | ChrII_A_nidulans_FGSC_A4:577641-578528 | WT_5hasex | WT_veg | OK     | 374,895   | 582,99   | 0,636984   | -1,28673   | 0,19819    | 0,451998   | no  |
| AN8043 | ChrII_A_nidulans_FGSC_A4:586495-587297 | WT_5hasex | WT_veg | OK     | 47,7796   | 50,9193  | 0,0918187  | -0,175917  | 0,860359   | 0,945942   | no  |
| AN8044 | ChrII_A_nidulans_FGSC_A4:588448-591926 | WT_5hasex | WT_veg | OK     | 79,6369   | 49,6464  | -0,681747  | 1,37476    | 0,169206   | 0,409436   | no  |
| AN8045 | ChrII_A_nidulans_FGSC_A4:592122-593318 | WT_5hasex | WT_veg | OK     | 58,5303   | 97,1044  | 0,730352   | -1,47192   | 0,141042   | 0,364245   | no  |
| AN8046 | ChrII_A_nidulans_FGSC_A4:595244-596285 | WT_5hasex | WT_veg | OK     | 46,0473   | 45,0661  | -0,0310721 | 0,049942   | 0,960169   | 0,985291   | no  |
| AN8048 | ChrII_A_nidulans_FGSC_A4:600606-601325 | WT_5hasex | WT_veg | OK     | 9,54143   | 26,6925  | 1,48416    | -2,16189   | 0,0306265  | 0,12325    | no  |
| AN8049 | ChrII_A_nidulans_FGSC_A4:601556-602499 | WT_5hasex | WT_veg | OK     | 152,756   | 297,653  | 0,962402   | -2,00069   | 0,0454259  | 0,165709   | no  |
| AN8050 | ChrII_A_nidulans_FGSC_A4:602648-603277 | WT_5hasex | WT_veg | OK     | 193,784   | 834,24   | 2,10601    | -4,36928   | 1,2466E-05 | 0,00017466 | yes |
| AN8051 | ChrII_A_nidulans_FGSC_A4:605271-606972 | WT_5hasex | WT_veg | OK     | 19,6299   | 29,4642  | 0,585914   | -1,06272   | 0,287908   | 0,562337   | no  |
| AN8052 | ChrII_A_nidulans_FGSC_A4:607205-608227 | WT_5hasex | WT_veg | NOTEST | 0,487953  | 1,2556   | 1,36356    | -0,860713  | 0,389396   | 1          | no  |
| AN8053 | ChrII_A_nidulans_FGSC_A4:608533-612504 | WT_5hasex | WT_veg | OK     | 22,669    | 31,5492  | 0,476883   | -0,993665  | 0,320386   | 0,59664    | no  |
| AN8054 | ChrII_A_nidulans_FGSC_A4:614119-615315 | WT_5hasex | WT_veg | OK     | 244,386   | 224,663  | -0,121402  | 0,245093   | 0,806385   | 0,922289   | no  |
| AN8055 | ChrII_A_nidulans_FGSC_A4:616471-618816 | WT_5hasex | WT_veg | OK     | 68,4661   | 116,905  | 0,771877   | -1,60345   | 0,108835   | 0,307267   | no  |
| AN8056 | ChrII_A_nidulans_FGSC_A4:620002-623558 | WT_5hasex | WT_veg | OK     | 27,6883   | 48,1801  | 0,799161   | -1,65652   | 0,0976168  | 0,284453   | no  |
| AN8058 | ChrII_A_nidulans_FGSC_A4:625152-626499 | WT_5hasex | WT_veg | OK     | 9,21662   | 60,9372  | 2,72501    | -4,45851   | 8,2533E-06 | 0,00012132 | yes |
| AN8059 | ChrII_A_nidulans_FGSC_A4:627027-627868 | WT_5hasex | WT_veg | OK     | 38,6609   | 99,8327  | 1,36864    | -2,45176   | 0,0142161  | 0,0686404  | no  |
| AN8060 | ChrII_A_nidulans_FGSC_A4:628576-629651 | WT_5hasex | WT_veg | OK     | 26,1148   | 8,28031  | -1,65711   | 2,76559    | 0,00568196 | 0,0330168  | yes |
| AN8062 | ChrII_A_nidulans_FGSC_A4:634160-635329 | WT_5hasex | WT_veg | OK     | 10,0101   | 94,6123  | 3,24057    | -5,28636   | 1,2478E-07 | 2,8317E-06 | yes |
| AN8063 | ChrII_A_nidulans_FGSC_A4:635382-636804 | WT_5hasex | WT_veg | OK     | 58,4958   | 55,1624  | -0,0846475 | 0,147596   | 0,882661   | 0,955538   | no  |
| AN8064 | ChrII_A_nidulans_FGSC_A4:637581-639035 | WT_5hasex | WT_veg | OK     | 25,1028   | 40,0354  | 0,673427   | -1,25925   | 0,207939   | 0,465298   | no  |
| AN8065 | ChrII_A_nidulans_FGSC_A4:639303-640434 | WT_5hasex | WT_veg | OK     | 124,573   | 190,275  | 0,611096   | -1,24174   | 0,214333   | 0,473899   | no  |
| AN8066 | ChrII_A_nidulans_FGSC_A4:640466-642564 | WT_5hasex | WT_veg | OK     | 9,83837   | 39,8727  | 2,01891    | -3,40179   | 0,00066947 | 0,0055752  | yes |
| AN8067 | ChrII_A_nidulans_FGSC_A4:642976-645790 | WT_5hasex | WT_veg | OK     | 29,8104   | 108,084  | 1,85826    | -3,76328   | 0,0001677  | 0,00171304 | yes |
| AN8068 | ChrII_A_nidulans_FGSC_A4:646561-648587 | WT_5hasex | WT_veg | OK     | 91,532    | 34,7298  | -1,3981    | 2,7071     | 0,00678743 | 0,0382199  | yes |
| AN8069 | ChrII_A_nidulans_FGSC_A4:648933-651813 | WT_5hasex | WT_veg | OK     | 15,1644   | 18,7328  | 0,30488    | -0,566729  | 0,570899   | 0,795614   | no  |
| AN8072 | ChrII_A_nidulans_FGSC_A4:661071-661887 | WT_5hasex | WT_veg | OK     | 70,3351   | 113,323  | 0,688121   | -1,37758   | 0,168334   | 0,408267   | no  |
| AN8073 | ChrII_A_nidulans_FGSC_A4:662220-664686 | WT_5hasex | WT_veg | OK     | 22,7793   | 127,253  | 2,48191    | -4,95539   | 7,2187E-07 | 1,3741E-05 | yes |
| AN8074 | ChrII_A_nidulans_FGSC_A4:665179-669233 | WT_5hasex | WT_veg | OK     | 21,6179   | 52,7279  | 1,28634    | -2,55996   | 0,0104683  | 0,0540029  | no  |
| AN8075 | ChrII_A_nidulans_FGSC_A4:669864-671759 | WT_5hasex | WT_veg | OK     | 15,1657   | 54,2434  | 1,83864    | -3,34864   | 0,00081211 | 0,00657946 | yes |
| AN8076 | ChrII_A_nidulans_FGSC_A4:673148-679312 | WT_5hasex | WT_veg | OK     | 10,5003   | 16,1479  | 0,620916   | -1,2721    | 0,203339   | 0,459262   | no  |
| AN8077 | ChrII_A_nidulans_FGSC_A4:680623-682388 | WT_5hasex | WT_veg | OK     | 11,988    | 22,9671  | 0,937977   | -1,65493   | 0,0979392  | 0,285046   | no  |
| AN8079 | ChrII_A_nidulans_FGSC_A4:685089-687295 | WT_5hasex | WT_veg | OK     | 5,28583   | 5,16508  | -0,0333406 | 0,050215   | 0,959951   | 0,985184   | no  |
| AN8080 | ChrII_A_nidulans_FGSC_A4:688873-689901 | WT_5hasex | WT_veg | OK     | 191,709   | 446,398  | 1,21942    | -2,39097   | 0,0168038  | 0,0780892  | no  |
| AN8081 | ChrII_A_nidulans_FGSC_A4:690214-690993 | WT_5hasex | WT_veg | NOTEST | 1,38505   | 2,33754  | 0,755055   | -0,562097  | 0,57405    | 1          | no  |
| AN8083 | ChrII_A_nidulans_FGSC_A4:698879-700813 | WT_5hasex | WT_veg | OK     | 6,27136   | 2,5691   | -1,28752   | 1,73299    | 0,0830972  | 0,254572   | no  |
| AN8084 | ChrII_A_nidulans_FGSC_A4:700891-702966 | WT_5hasex | WT_veg | NOTEST | 1,63842   | 1,40968  | -0,216938  | 0,206165   | 0,836662   | 1          | no  |

## Supplementary table 1

|        |                                        |           |        |        |          |          |               |               |            |            |     |
|--------|----------------------------------------|-----------|--------|--------|----------|----------|---------------|---------------|------------|------------|-----|
| AN8085 | ChrII_A_nidulans_FGSC_A4:704470-708170 | WT_5hasex | WT_veg | OK     | 1,90717  | 3,90807  | 1,03502       | -1,45342      | 0,146108   | 0,372809   | no  |
| AN8086 | ChrII_A_nidulans_FGSC_A4:709622-710355 | WT_5hasex | WT_veg | OK     | 14,523   | 3,23901  | -2,16471      | 2,28598       | 0,0222554  | 0,0965258  | no  |
| AN8088 | ChrII_A_nidulans_FGSC_A4:712180-714290 | WT_5hasex | WT_veg | OK     | 2,61866  | 5,88696  | 1,1687        | -1,60554      | 0,108374   | 0,306361   | no  |
| AN8089 | ChrII_A_nidulans_FGSC_A4:714794-716562 | WT_5hasex | WT_veg | OK     | 7,10763  | 10,2689  | 0,530837      | -0,841937     | 0,399823   | 0,67212    | no  |
| AN8090 | ChrII_A_nidulans_FGSC_A4:717252-718374 | WT_5hasex | WT_veg | NOTEST | 0,813765 | 0        | -1.79769e+308 | -1.79769e+308 | 0,224063   | 1          | no  |
| AN8091 | ChrII_A_nidulans_FGSC_A4:719539-720718 | WT_5hasex | WT_veg | NOTEST | 1,61577  | 1,01253  | -0,674256     | 0,565158      | 0,571966   | 1          | no  |
| AN8092 | ChrII_A_nidulans_FGSC_A4:723901-727205 | WT_5hasex | WT_veg | OK     | 2,13623  | 5,75658  | 1,43015       | -1,76408      | 0,0777179  | 0,242936   | no  |
| AN8093 | ChrII_A_nidulans_FGSC_A4:728810-730361 | WT_5hasex | WT_veg | OK     | 7,73229  | 27,6919  | 1,8405        | -2,48332      | 0,0130165  | 0,0641245  | no  |
| AN8094 | ChrII_A_nidulans_FGSC_A4:730957-731455 | WT_5hasex | WT_veg | NOTEST | 0        | 0        | 0             | 0             | 1          | 1          | no  |
| AN8095 | ChrII_A_nidulans_FGSC_A4:733216-735110 | WT_5hasex | WT_veg | OK     | 11,5669  | 85,5225  | 2,8863        | -4,95233      | 7,3329E-07 | 1,3933E-05 | yes |
| AN8098 | ChrII_A_nidulans_FGSC_A4:748579-749523 | WT_5hasex | WT_veg | OK     | 17,0197  | 108,203  | 2,66846       | -4,30482      | 1,6712E-05 | 0,00022853 | yes |
| AN8099 | ChrII_A_nidulans_FGSC_A4:752073-753835 | WT_5hasex | WT_veg | OK     | 41,8618  | 6,03208  | -2,7949       | 4,30127       | 1,6982E-05 | 0,00023162 | yes |
| AN8100 | ChrII_A_nidulans_FGSC_A4:754495-756289 | WT_5hasex | WT_veg | OK     | 4,13236  | 10,8621  | 1,39427       | -2,08141      | 0,0373962  | 0,143523   | no  |
| AN8101 | ChrII_A_nidulans_FGSC_A4:756694-757602 | WT_5hasex | WT_veg | NOTEST | 0,217794 | 0,437267 | 1,00555       | -0,483945     | 0,628425   | 1          | no  |
| AN8102 | ChrII_A_nidulans_FGSC_A4:760631-762135 | WT_5hasex | WT_veg | OK     | 99,3713  | 416,523  | 2,0675        | -3,94346      | 8,0313E-05 | 0,00090488 | yes |
| AN8103 | ChrII_A_nidulans_FGSC_A4:762921-763588 | WT_5hasex | WT_veg | NOTEST | 1,1061   | 1,74015  | 0,653732      | -0,461531     | 0,644418   | 1          | no  |
| AN8104 | ChrII_A_nidulans_FGSC_A4:764387-765299 | WT_5hasex | WT_veg | NOTEST | 0        | 0        | 0             | 0             | 1          | 1          | no  |
| AN8105 | ChrII_A_nidulans_FGSC_A4:766659-769893 | WT_5hasex | WT_veg | NOTEST | 0        | 0        | 0             | 0             | 1          | 1          | no  |
| AN8106 | ChrII_A_nidulans_FGSC_A4:771859-772905 | WT_5hasex | WT_veg | NOTEST | 0        | 0        | 0             | 0             | 1          | 1          | no  |
| AN8108 | ChrII_A_nidulans_FGSC_A4:777935-779374 | WT_5hasex | WT_veg | NOTEST | 0        | 0        | 0             | 0             | 1          | 1          | no  |
| AN8110 | ChrII_A_nidulans_FGSC_A4:782560-783621 | WT_5hasex | WT_veg | NOTEST | 0        | 2,12255  | 1.79769e+308  | 1.79769e+308  | 0,036343   | 1          | no  |
| AN8111 | ChrII_A_nidulans_FGSC_A4:783737-786158 | WT_5hasex | WT_veg | NOTEST | 0,824238 | 1,40383  | 0,768232      | -0,838094     | 0,401978   | 1          | no  |
| AN8112 | ChrII_A_nidulans_FGSC_A4:786614-788423 | WT_5hasex | WT_veg | NOTEST | 1,34524  | 1,31149  | -0,0366616    | 0,0340743     | 0,972818   | 1          | no  |
| AN8113 | ChrII_A_nidulans_FGSC_A4:789317-790185 | WT_5hasex | WT_veg | NOTEST | 0,304557 | 0        | -1.79769e+308 | -1.79769e+308 | 0,224063   | 1          | no  |
| AN8114 | ChrII_A_nidulans_FGSC_A4:791241-792187 | WT_5hasex | WT_veg | NOTEST | 0,202673 | 0        | -1.79769e+308 | -1.79769e+308 | 0,165569   | 1          | no  |
| AN8115 | ChrII_A_nidulans_FGSC_A4:794109-795369 | WT_5hasex | WT_veg | NOTEST | 0,934179 | 0,650288 | -0,52262      | 0,352204      | 0,724685   | 1          | no  |
| AN8116 | ChrII_A_nidulans_FGSC_A4:800352-801879 | WT_5hasex | WT_veg | OK     | 5,65016  | 0,81829  | -2,78761      | 2,36001       | 0,0182746  | 0,0830838  | no  |
| AN8117 | ChrII_A_nidulans_FGSC_A4:805621-807249 | WT_5hasex | WT_veg | OK     | 70,4708  | 219,967  | 1,64219       | -3,43484      | 0,0005929  | 0,00503635 | yes |
| AN8118 | ChrII_A_nidulans_FGSC_A4:808472-809563 | WT_5hasex | WT_veg | OK     | 831,201  | 997,422  | 0,263007      | -0,482839     | 0,62921    | 0,82993    | no  |
| AN8119 | ChrII_A_nidulans_FGSC_A4:809593-811291 | WT_5hasex | WT_veg | OK     | 68,5998  | 128,299  | 0,903233      | -1,87222      | 0,0611764  | 0,204946   | no  |
| AN8121 | ChrII_A_nidulans_FGSC_A4:814719-818802 | WT_5hasex | WT_veg | OK     | 19,0904  | 40,2619  | 1,07657       | -2,22092      | 0,0263566  | 0,109852   | no  |
| AN8122 | ChrII_A_nidulans_FGSC_A4:820216-821961 | WT_5hasex | WT_veg | OK     | 107,526  | 749,618  | 2,80147       | -4,79258      | 1,6465E-06 | 2,8846E-05 | yes |
| AN8124 | ChrII_A_nidulans_FGSC_A4:824404-826249 | WT_5hasex | WT_veg | OK     | 72,9303  | 1332,9   | 4,1919        | -6,73584      | 1,6298E-11 | 7,505E-10  | yes |
| AN8125 | ChrII_A_nidulans_FGSC_A4:826842-829475 | WT_5hasex | WT_veg | OK     | 26,0061  | 51,8467  | 0,995401      | -1,98863      | 0,046742   | 0,16939    | no  |
| AN8127 | ChrII_A_nidulans_FGSC_A4:833977-835484 | WT_5hasex | WT_veg | OK     | 4,30182  | 6,99267  | 0,700897      | -0,823545     | 0,410198   | 0,680206   | no  |
| AN8128 | ChrII_A_nidulans_FGSC_A4:836287-837992 | WT_5hasex | WT_veg | OK     | 6,16677  | 14,2819  | 1,2116        | -1,93141      | 0,0534327  | 0,185946   | no  |
| AN8130 | ChrII_A_nidulans_FGSC_A4:850339-850832 | WT_5hasex | WT_veg | OK     | 33,641   | 88,1857  | 1,39033       | -2,3034       | 0,0212564  | 0,0934147  | no  |
| AN8131 | ChrII_A_nidulans_FGSC_A4:851884-853621 | WT_5hasex | WT_veg | NOTEST | 0,810418 | 0,161802 | -2,32444      | 0,769176      | 0,441789   | 1          | no  |
| AN8132 | ChrII_A_nidulans_FGSC_A4:855053-855908 | WT_5hasex | WT_veg | OK     | 7,1634   | 0,747497 | -3,26051      | 2,2595        | 0,0238525  | 0,101744   | no  |
| AN8133 | ChrII_A_nidulans_FGSC_A4:856327-857470 | WT_5hasex | WT_veg | OK     | 6,33325  | 1,13821  | -2,47618      | 2,10866       | 0,034974   | 0,136464   | no  |
| AN8134 | ChrII_A_nidulans_FGSC_A4:859352-861035 | WT_5hasex | WT_veg | OK     | 4,88932  | 11,4637  | 1,22937       | -1,87205      | 0,0612002  | 0,204986   | no  |
| AN8135 | ChrII_A_nidulans_FGSC_A4:861860-863627 | WT_5hasex | WT_veg | OK     | 13,7261  | 34,8583  | 1,34458       | -2,42346      | 0,0153734  | 0,0728585  | no  |
| AN8136 | ChrII_A_nidulans_FGSC_A4:864371-866043 | WT_5hasex | WT_veg | OK     | 4,43367  | 6,24253  | 0,493632      | -0,722039     | 0,470271   | 0,728228   | no  |
| AN8137 | ChrII_A_nidulans_FGSC_A4:866456-868074 | WT_5hasex | WT_veg | OK     | 10,6241  | 14,3894  | 0,437662      | -0,728964     | 0,466024   | 0,72477    | no  |
| AN8140 | ChrII_A_nidulans_FGSC_A4:885132-886757 | WT_5hasex | WT_veg | NOTEST | 0,830781 | 0,592209 | -0,488364     | 0,329118      | 0,742066   | 1          | no  |
| AN8142 | ChrII_A_nidulans_FGSC_A4:889426-890518 | WT_5hasex | WT_veg | OK     | 1,52572  | 11,6615  | 2,93419       | -3,48039      | 0,00050069 | 0,00435829 | yes |
| AN8143 | ChrII_A_nidulans_FGSC_A4:891399-892642 | WT_5hasex | WT_veg | NOTEST | 0,202799 | 0,163624 | -0,309661     | 0,0891265     | 0,928981   | 1          | no  |
| AN8144 | ChrII_A_nidulans_FGSC_A4:893163-893977 | WT_5hasex | WT_veg | NOTEST | 0        | 0        | 0             | 0             | 1          | 1          | no  |
| AN8145 | ChrII_A_nidulans_FGSC_A4:895666-896542 | WT_5hasex | WT_veg | OK     | 608,422  | 1583,88  | 1,38032       | -2,11993      | 0,0340119  | 0,133776   | no  |
| AN8146 | ChrII_A_nidulans_FGSC_A4:897124-898321 | WT_5hasex | WT_veg | OK     | 62,7405  | 157,261  | 1,32569       | -2,21682      | 0,0266353  | 0,110685   | no  |
| AN8147 | ChrII_A_nidulans_FGSC_A4:899827-901880 | WT_5hasex | WT_veg | OK     | 3,37952  | 7,21106  | 1,09339       | -1,59094      | 0,111624   | 0,312144   | no  |
| AN8148 | ChrII_A_nidulans_FGSC_A4:903351-904600 | WT_5hasex | WT_veg | OK     | 5,23281  | 24,9944  | 2,25595       | -2,91413      | 0,00356677 | 0,0225923  | yes |
| AN8150 | ChrII_A_nidulans_FGSC_A4:909758-917049 | WT_5hasex | WT_veg | OK     | 5,71762  | 23,663   | 2,04914       | -3,47239      | 0,00051584 | 0,00446941 | yes |

## Supplementary table 1

|        |                                          |           |        |        |           |          |               |               |            |            |     |
|--------|------------------------------------------|-----------|--------|--------|-----------|----------|---------------|---------------|------------|------------|-----|
| AN8151 | ChrII_A_nidulans_FGSC_A4:925293-926743   | WT_5hasex | WT_veg | NOTEST | 1,23157   | 1,39976  | 0,184678      | -0,17617      | 0,860161   | 1          | no  |
| AN8152 | ChrII_A_nidulans_FGSC_A4:927166-929136   | WT_5hasex | WT_veg | NOTEST | 0,0970231 | 0        | -1.79769e+308 | -1.79769e+308 | 0,165569   | 1          | no  |
| AN8153 | ChrII_A_nidulans_FGSC_A4:931389-933319   | WT_5hasex | WT_veg | NOTEST | 0,632804  | 0,327333 | -0,951        | 0,611227      | 0,541049   | 1          | no  |
| AN8154 | ChrII_A_nidulans_FGSC_A4:935755-936766   | WT_5hasex | WT_veg | OK     | 19,1458   | 16,5664  | -0,208768     | 0,346781      | 0,728756   | 0,885141   | no  |
| AN8155 | ChrII_A_nidulans_FGSC_A4:937766-938854   | WT_5hasex | WT_veg | OK     | 11,4572   | 42,2154  | 1,88152       | -2,76569      | 0,0056802  | 0,0330103  | yes |
| AN8157 | ChrII_A_nidulans_FGSC_A4:948782-949991   | WT_5hasex | WT_veg | NOTEST | 0,187167  | 0,679329 | 1,85978       | -0,818087     | 0,413308   | 1          | no  |
| AN8158 | ChrII_A_nidulans_FGSC_A4:951190-953522   | WT_5hasex | WT_veg | NOTEST | 0,388139  | 1,08503  | 1,48308       | -1,20307      | 0,228948   | 1          | no  |
| AN8159 | ChrII_A_nidulans_FGSC_A4:963205-963962   | WT_5hasex | WT_veg | OK     | 0,321225  | 10,4837  | 5,02842       | -3,27181      | 0,00106862 | 0,00829103 | yes |
| AN8160 | ChrII_A_nidulans_FGSC_A4:964820-967960   | WT_5hasex | WT_veg | NOTEST | 0,400712  | 1,76297  | 2,13737       | -1,00039      | 0,317123   | 1          | no  |
| AN8161 | ChrII_A_nidulans_FGSC_A4:970631-972789   | WT_5hasex | WT_veg | OK     | 23,3793   | 21,2862  | -0,135317     | 0,271962      | 0,785651   | 0,912449   | no  |
| AN8162 | ChrII_A_nidulans_FGSC_A4:973208-974630   | WT_5hasex | WT_veg | OK     | 3,68319   | 6,11201  | 0,73069       | -1,00856      | 0,313185   | 0,589238   | no  |
| AN8163 | ChrII_A_nidulans_FGSC_A4:975507-979040   | WT_5hasex | WT_veg | OK     | 4,10226   | 16,3669  | 1,99629       | -2,69927      | 0,00694922 | 0,0388928  | yes |
| AN8164 | ChrII_A_nidulans_FGSC_A4:975507-979040   | WT_5hasex | WT_veg | OK     | 2,10407   | 7,7278   | 1,87687       | -2,62663      | 0,00862357 | 0,0463384  | yes |
| AN8165 | ChrII_A_nidulans_FGSC_A4:979843-981751   | WT_5hasex | WT_veg | OK     | 7,05817   | 15,0695  | 1,09427       | -1,79496      | 0,0726602  | 0,231447   | no  |
| AN8166 | ChrII_A_nidulans_FGSC_A4:982776-984225   | WT_5hasex | WT_veg | OK     | 24,6516   | 17,8357  | -0,466909     | 0,795881      | 0,426101   | 0,693387   | no  |
| AN8167 | ChrII_A_nidulans_FGSC_A4:985566-987278   | WT_5hasex | WT_veg | OK     | 31,531    | 48,0208  | 0,60689       | -1,23023      | 0,21861    | 0,479314   | no  |
| AN8169 | ChrII_A_nidulans_FGSC_A4:996556-998638   | WT_5hasex | WT_veg | OK     | 80,5861   | 328,273  | 2,02629       | -3,7908       | 0,00015016 | 0,00155604 | yes |
| AN8172 | ChrII_A_nidulans_FGSC_A4:1005511-1007389 | WT_5hasex | WT_veg | OK     | 61,3904   | 174,292  | 1,50542       | -2,94671      | 0,00321179 | 0,0206914  | yes |
| AN8173 | ChrII_A_nidulans_FGSC_A4:1007837-1008863 | WT_5hasex | WT_veg | OK     | 9,7835    | 18,9209  | 0,951561      | -1,51441      | 0,129923   | 0,345174   | no  |
| AN8174 | ChrII_A_nidulans_FGSC_A4:1009949-1012416 | WT_5hasex | WT_veg | OK     | 8,25257   | 17,8765  | 1,11515       | -1,76735      | 0,0771697  | 0,241611   | no  |
| AN8175 | ChrII_A_nidulans_FGSC_A4:1014676-1016416 | WT_5hasex | WT_veg | OK     | 27,2096   | 76,9702  | 1,50019       | -3,01373      | 0,00258061 | 0,0172597  | yes |
| AN8176 | ChrII_A_nidulans_FGSC_A4:1019915-1021367 | WT_5hasex | WT_veg | OK     | 510,928   | 837,181  | 0,712419      | -1,30335      | 0,192455   | 0,443922   | no  |
| AN8177 | ChrII_A_nidulans_FGSC_A4:1028424-1031481 | WT_5hasex | WT_veg | NOTEST | 1,18493   | 3,65102  | 1,6235        | -2,19484      | 0,028175   | 1          | no  |
| AN8178 | ChrII_A_nidulans_FGSC_A4:1032352-1033007 | WT_5hasex | WT_veg | OK     | 3,79678   | 2,40184  | -0,660637     | 0,450175      | 0,652585   | 0,843156   | no  |
| AN8179 | ChrII_A_nidulans_FGSC_A4:1033788-1036532 | WT_5hasex | WT_veg | OK     | 18,6669   | 40,3453  | 1,11192       | -2,22436      | 0,0261245  | 0,109177   | no  |
| AN8180 | ChrII_A_nidulans_FGSC_A4:1036785-1038668 | WT_5hasex | WT_veg | OK     | 31,7095   | 98,4837  | 1,63497       | -3,34998      | 0,00080817 | 0,00654963 | yes |
| AN8181 | ChrII_A_nidulans_FGSC_A4:1041671-1043654 | WT_5hasex | WT_veg | OK     | 46,7714   | 54,0368  | 0,208314      | -0,366969     | 0,713642   | 0,876921   | no  |
| AN8183 | ChrII_A_nidulans_FGSC_A4:1048882-1051839 | WT_5hasex | WT_veg | OK     | 10,6666   | 54,6125  | 2,35613       | -4,38604      | 1,1543E-05 | 0,00016305 | yes |
| AN8186 | ChrII_A_nidulans_FGSC_A4:1061095-1062531 | WT_5hasex | WT_veg | OK     | 11,0669   | 25,6345  | 1,21183       | -1,9785       | 0,0478719  | 0,172399   | no  |
| AN8187 | ChrII_A_nidulans_FGSC_A4:1062803-1064491 | WT_5hasex | WT_veg | OK     | 62,4119   | 113,214  | 0,859156      | -1,77028      | 0,0766798  | 0,24058    | no  |
| AN8188 | ChrII_A_nidulans_FGSC_A4:1064985-1066257 | WT_5hasex | WT_veg | OK     | 83,8268   | 246,963  | 1,55881       | -3,1237       | 0,00178595 | 0,0127088  | yes |
| AN8189 | ChrII_A_nidulans_FGSC_A4:1067233-1069489 | WT_5hasex | WT_veg | NOTEST | 0,407103  | 1,06322  | 1,38497       | -1,27753      | 0,201414   | 1          | no  |
| AN8190 | ChrII_A_nidulans_FGSC_A4:1071558-1075046 | WT_5hasex | WT_veg | OK     | 39,5469   | 49,9801  | 0,33779       | -0,685972     | 0,492731   | 0,744514   | no  |
| AN8191 | ChrII_A_nidulans_FGSC_A4:1076553-1077602 | WT_5hasex | WT_veg | OK     | 41,4057   | 111,874  | 1,43397       | -2,85144      | 0,00435219 | 0,0266088  | yes |
| AN8192 | ChrII_A_nidulans_FGSC_A4:1078560-1082312 | WT_5hasex | WT_veg | OK     | 11,6677   | 18,7324  | 0,683019      | -1,34171      | 0,17969    | 0,425723   | no  |
| AN8193 | ChrII_A_nidulans_FGSC_A4:1082333-1083268 | WT_5hasex | WT_veg | OK     | 12,4116   | 38,2004  | 1,6219        | -2,55054      | 0,0107556  | 0,0551751  | no  |
| AN8194 | ChrII_A_nidulans_FGSC_A4:1092661-1093515 | WT_5hasex | WT_veg | OK     | 81,9671   | 135,111  | 0,721032      | -1,44537      | 0,148355   | 0,376177   | no  |
| AN8195 | ChrII_A_nidulans_FGSC_A4:1098265-1098715 | WT_5hasex | WT_veg | OK     | 4,6843    | 71,9667  | 3,94142       | -4,68641      | 2,7804E-06 | 4,5918E-05 | yes |
| AN8196 | ChrII_A_nidulans_FGSC_A4:1100287-1101136 | WT_5hasex | WT_veg | OK     | 6,00056   | 5,23301  | -0,197458     | 0,232289      | 0,816313   | 0,926473   | no  |
| AN8197 | ChrII_A_nidulans_FGSC_A4:1101408-1103071 | WT_5hasex | WT_veg | OK     | 18,9047   | 36,3364  | 0,942673      | -1,79102      | 0,0732893  | 0,23289    | no  |
| AN8198 | ChrII_A_nidulans_FGSC_A4:1105095-1107526 | WT_5hasex | WT_veg | NOTEST | 1,19092   | 2,1211   | 0,832738      | -0,876933     | 0,380523   | 1          | no  |
| AN8199 | ChrII_A_nidulans_FGSC_A4:1109267-1110823 | WT_5hasex | WT_veg | OK     | 6,1568    | 3,89856  | -0,659239     | 0,933716      | 0,35045    | 0,626041   | no  |
| AN8200 | ChrII_A_nidulans_FGSC_A4:1114497-1115325 | WT_5hasex | WT_veg | OK     | 132,358   | 583,504  | 2,1403        | -4,41427      | 1,0135E-05 | 0,00014579 | yes |
| AN8201 | ChrII_A_nidulans_FGSC_A4:1115537-1118303 | WT_5hasex | WT_veg | OK     | 37,2497   | 63,0319  | 0,758851      | -1,58501      | 0,112963   | 0,314582   | no  |
| AN8202 | ChrII_A_nidulans_FGSC_A4:1118593-1120496 | WT_5hasex | WT_veg | OK     | 164,262   | 447,564  | 1,44609       | -2,84022      | 0,0045082  | 0,0273868  | yes |
| AN8203 | ChrII_A_nidulans_FGSC_A4:1120636-1123564 | WT_5hasex | WT_veg | OK     | 42,4322   | 45,6023  | 0,103947      | -0,213255     | 0,831128   | 0,932807   | no  |
| AN8204 | ChrII_A_nidulans_FGSC_A4:1123891-1125270 | WT_5hasex | WT_veg | OK     | 33,8469   | 41,7813  | 0,303834      | -0,597827     | 0,549955   | 0,782135   | no  |
| AN8205 | ChrII_A_nidulans_FGSC_A4:1125457-1129634 | WT_5hasex | WT_veg | OK     | 11,5348   | 9,69736  | -0,250323     | 0,503358      | 0,614712   | 0,821657   | no  |
| AN8206 | ChrII_A_nidulans_FGSC_A4:1130163-1131682 | WT_5hasex | WT_veg | OK     | 27,5944   | 18,7419  | -0,55811      | 1,07513       | 0,282318   | 0,556104   | no  |
| AN8207 | ChrII_A_nidulans_FGSC_A4:1133990-1134726 | WT_5hasex | WT_veg | OK     | 10,5598   | 59,5577  | 2,4957        | -3,81194      | 0,00013788 | 0,00144878 | yes |
| AN8208 | ChrII_A_nidulans_FGSC_A4:1135348-1139121 | WT_5hasex | WT_veg | OK     | 12,9567   | 15,3696  | 0,246376      | -0,485138     | 0,627579   | 0,828706   | no  |
| AN8211 | ChrII_A_nidulans_FGSC_A4:1155916-1161338 | WT_5hasex | WT_veg | OK     | 22,0869   | 34,4765  | 0,624245      | -1,34338      | 0,179149   | 0,424862   | no  |
| AN8212 | ChrII_A_nidulans_FGSC_A4:1162843-1164124 | WT_5hasex | WT_veg | OK     | 8,81162   | 16,8753  | 0,937438      | -1,50946      | 0,131181   | 0,347199   | no  |

## Supplementary table 1

|        |                                          |           |        |        |           |          |               |               |            |            |     |
|--------|------------------------------------------|-----------|--------|--------|-----------|----------|---------------|---------------|------------|------------|-----|
| AN8213 | ChrII_A_nidulans_FGSC_A4:1164449-1165626 | WT_5hasex | WT_veg | OK     | 33,2803   | 23,9022  | -0,477521     | 0,920215      | 0,35746    | 0,632676   | no  |
| AN8214 | ChrII_A_nidulans_FGSC_A4:1165867-1167434 | WT_5hasex | WT_veg | OK     | 12,6995   | 35,2374  | 1,47234       | -2,54542      | 0,0109147  | 0,0557918  | no  |
| AN8219 | ChrII_A_nidulans_FGSC_A4:1181567-1186594 | WT_5hasex | WT_veg | OK     | 3,16095   | 6,45003  | 1,02895       | -1,63932      | 0,101146   | 0,291831   | no  |
| AN8220 | ChrII_A_nidulans_FGSC_A4:1188991-1189879 | WT_5hasex | WT_veg | NOTEST | 0         | 0        | 0             | 0             | 1          | 1          | no  |
| AN8221 | ChrII_A_nidulans_FGSC_A4:1190802-1192501 | WT_5hasex | WT_veg | NOTEST | 0,644727  | 0,436515 | -0,562658     | 0,364359      | 0,71559    | 1          | no  |
| AN8222 | ChrII_A_nidulans_FGSC_A4:1193299-1194629 | WT_5hasex | WT_veg | OK     | 5,7824    | 8,23105  | 0,509409      | -0,687048     | 0,492053   | 0,744035   | no  |
| AN8223 | ChrII_A_nidulans_FGSC_A4:1195480-1196159 | WT_5hasex | WT_veg | OK     | 39,7125   | 66,2352  | 0,738004      | -1,29206      | 0,196336   | 0,449256   | no  |
| AN8224 | ChrII_A_nidulans_FGSC_A4:1196220-1198507 | WT_5hasex | WT_veg | OK     | 77,3139   | 194,08   | 1,32785       | -2,72633      | 0,00640423 | 0,0364579  | yes |
| AN8225 | ChrII_A_nidulans_FGSC_A4:1198676-1199717 | WT_5hasex | WT_veg | OK     | 88,3805   | 156,945  | 0,828455      | -1,66103      | 0,0967072  | 0,282541   | no  |
| AN8226 | ChrII_A_nidulans_FGSC_A4:1199852-1200862 | WT_5hasex | WT_veg | OK     | 37,648    | 57,4634  | 0,610072      | -1,16498      | 0,244028   | 0,51144    | no  |
| AN8227 | ChrII_A_nidulans_FGSC_A4:1201388-1202591 | WT_5hasex | WT_veg | OK     | 29,8507   | 22,6501  | -0,398248     | 0,713584      | 0,475485   | 0,731906   | no  |
| AN8229 | ChrII_A_nidulans_FGSC_A4:1206875-1208458 | WT_5hasex | WT_veg | OK     | 117,823   | 333,855  | 1,50259       | -2,9755       | 0,00292511 | 0,019141   | yes |
| AN8231 | ChrII_A_nidulans_FGSC_A4:1215638-1218013 | WT_5hasex | WT_veg | OK     | 117,23    | 288,765  | 1,30055       | -2,5978       | 0,0093824  | 0,0495322  | yes |
| AN8232 | ChrII_A_nidulans_FGSC_A4:1219719-1221184 | WT_5hasex | WT_veg | OK     | 54,0002   | 68,7431  | 0,348251      | -0,712121     | 0,476329   | 0,732476   | no  |
| AN8233 | ChrII_A_nidulans_FGSC_A4:1221629-1223157 | WT_5hasex | WT_veg | OK     | 152,779   | 231,278  | 0,598181      | -1,17054      | 0,241785   | 0,508183   | no  |
| AN8234 | ChrII_A_nidulans_FGSC_A4:1223280-1224993 | WT_5hasex | WT_veg | OK     | 185,904   | 353,292  | 0,926303      | -1,83688      | 0,0662273  | 0,216794   | no  |
| AN8235 | ChrII_A_nidulans_FGSC_A4:1225488-1230402 | WT_5hasex | WT_veg | OK     | 28,4809   | 55,4154  | 0,960296      | -1,69877      | 0,0893632  | 0,26788    | no  |
| AN8236 | ChrII_A_nidulans_FGSC_A4:1231841-1234240 | WT_5hasex | WT_veg | OK     | 26,3584   | 41,6648  | 0,660567      | -1,35517      | 0,175365   | 0,419687   | no  |
| AN8237 | ChrII_A_nidulans_FGSC_A4:1234994-1236074 | WT_5hasex | WT_veg | OK     | 44,5194   | 108,059  | 1,27931       | -2,58512      | 0,00973444 | 0,0509747  | no  |
| AN8238 | ChrII_A_nidulans_FGSC_A4:1242733-1243385 | WT_5hasex | WT_veg | OK     | 6,05236   | 7,08021  | 0,226294      | -0,269677     | 0,787409   | 0,913266   | no  |
| AN8239 | ChrII_A_nidulans_FGSC_A4:1243683-1244686 | WT_5hasex | WT_veg | OK     | 34,3354   | 142,806  | 2,05628       | -3,97654      | 6,9924E-05 | 0,00080301 | yes |
| AN8240 | ChrII_A_nidulans_FGSC_A4:1244686-1246184 | WT_5hasex | WT_veg | OK     | 12,2302   | 24,397   | 0,99625       | -1,72364      | 0,0847722  | 0,258253   | no  |
| AN8242 | ChrII_A_nidulans_FGSC_A4:1252351-1253427 | WT_5hasex | WT_veg | OK     | 43,0524   | 63,8505  | 0,568604      | -0,981537     | 0,326328   | 0,602663   | no  |
| AN8247 | ChrII_A_nidulans_FGSC_A4:1265878-1266730 | WT_5hasex | WT_veg | OK     | 17,2955   | 128,528  | 2,89361       | -4,71892      | 2,371E-06  | 3,9873E-05 | yes |
| AN8248 | ChrII_A_nidulans_FGSC_A4:1267861-1269483 | WT_5hasex | WT_veg | OK     | 12,958    | 37,2058  | 1,52168       | -2,6988       | 0,00695895 | 0,0389347  | yes |
| AN8249 | ChrII_A_nidulans_FGSC_A4:1270669-1273062 | WT_5hasex | WT_veg | NOTEST | 0,0892732 | 0        | -1.79769e+308 | -1.79769e+308 | 0,23809    | 1          | no  |
| AN8253 | ChrII_A_nidulans_FGSC_A4:1288680-1290262 | WT_5hasex | WT_veg | OK     | 18,7106   | 117,662  | 2,65272       | -4,89833      | 9,6653E-07 | 1,7765E-05 | yes |
| AN8256 | ChrII_A_nidulans_FGSC_A4:1297989-1298820 | WT_5hasex | WT_veg | OK     | 84,62     | 191,492  | 1,17821       | -2,35181      | 0,0186823  | 0,0844758  | no  |
| AN8257 | ChrII_A_nidulans_FGSC_A4:1299906-1301666 | WT_5hasex | WT_veg | OK     | 19,1087   | 33,2669  | 0,799861      | -1,52391      | 0,127531   | 0,340859   | no  |
| AN8258 | ChrII_A_nidulans_FGSC_A4:1302105-1302680 | WT_5hasex | WT_veg | OK     | 99,791    | 166,323  | 0,737008      | -1,45908      | 0,144542   | 0,370214   | no  |
| AN8259 | ChrII_A_nidulans_FGSC_A4:1302817-1304645 | WT_5hasex | WT_veg | OK     | 7,20031   | 7,72178  | 0,100873      | -0,158453     | 0,8741     | 0,951793   | no  |
| AN8263 | ChrII_A_nidulans_FGSC_A4:1318051-1318820 | WT_5hasex | WT_veg | OK     | 6,91167   | 23,783   | 1,78282       | -2,54275      | 0,0109983  | 0,0561452  | no  |
| AN8264 | ChrII_A_nidulans_FGSC_A4:1318874-1320468 | WT_5hasex | WT_veg | OK     | 20,5812   | 95,2041  | 2,2097        | -4,23843      | 2,2509E-05 | 0,00029614 | yes |
| AN8265 | ChrII_A_nidulans_FGSC_A4:1323297-1324462 | WT_5hasex | WT_veg | OK     | 24,8073   | 36,9556  | 0,575026      | -0,955439     | 0,339356   | 0,615283   | no  |
| AN8266 | ChrII_A_nidulans_FGSC_A4:1326823-1328020 | WT_5hasex | WT_veg | OK     | 3,41268   | 8,37271  | 1,29479       | -1,78271      | 0,074633   | 0,235715   | no  |
| AN8267 | ChrII_A_nidulans_FGSC_A4:1329523-1330594 | WT_5hasex | WT_veg | OK     | 272,116   | 431,207  | 0,664157      | -1,32765      | 0,184295   | 0,432584   | no  |
| AN8268 | ChrII_A_nidulans_FGSC_A4:1331426-1333127 | WT_5hasex | WT_veg | OK     | 8,73158   | 31,9793  | 1,87282       | -3,16521      | 0,00154973 | 0,0112932  | yes |
| AN8270 | ChrII_A_nidulans_FGSC_A4:1337908-1340420 | WT_5hasex | WT_veg | OK     | 62,297    | 52,4966  | -0,246937     | 0,508467      | 0,611126   | 0,819558   | no  |
| AN8272 | ChrII_A_nidulans_FGSC_A4:1345230-1347449 | WT_5hasex | WT_veg | OK     | 24,9011   | 102,361  | 2,03939       | -4,0948       | 4,2253E-05 | 0,0005178  | yes |
| AN8273 | ChrII_A_nidulans_FGSC_A4:1347625-1349848 | WT_5hasex | WT_veg | OK     | 249,022   | 443,971  | 0,834193      | -1,57921      | 0,114289   | 0,317161   | no  |
| AN8274 | ChrII_A_nidulans_FGSC_A4:1350374-1352055 | WT_5hasex | WT_veg | OK     | 564,186   | 2245,68  | 1,99291       | -3,54671      | 0,00039008 | 0,00351639 | yes |
| AN8276 | ChrII_A_nidulans_FGSC_A4:1356127-1358728 | WT_5hasex | WT_veg | OK     | 34,0648   | 63,5815  | 0,900326      | -1,84415      | 0,0651617  | 0,214229   | no  |
| AN8278 | ChrII_A_nidulans_FGSC_A4:1362286-1363338 | WT_5hasex | WT_veg | OK     | 270,877   | 1328,54  | 2,29414       | -4,52628      | 6,0032E-06 | 9,1183E-05 | yes |
| AN8279 | ChrII_A_nidulans_FGSC_A4:1364312-1366442 | WT_5hasex | WT_veg | OK     | 53,3907   | 337,943  | 2,66212       | -5,28945      | 1,2269E-07 | 2,794E-06  | yes |
| AN8281 | ChrII_A_nidulans_FGSC_A4:1371142-1372726 | WT_5hasex | WT_veg | OK     | 86,5485   | 183,011  | 1,08035       | -2,1534       | 0,0312874  | 0,125403   | no  |
| AN8282 | ChrII_A_nidulans_FGSC_A4:1372810-1375390 | WT_5hasex | WT_veg | OK     | 10,8404   | 14,8109  | 0,450243      | -0,853949     | 0,393133   | 0,666312   | no  |
| AN8284 | ChrII_A_nidulans_FGSC_A4:1381987-1382935 | WT_5hasex | WT_veg | OK     | 85,0849   | 267,515  | 1,65264       | -3,39383      | 0,00068922 | 0,00571914 | yes |
| AN8285 | ChrII_A_nidulans_FGSC_A4:1383521-1384412 | WT_5hasex | WT_veg | OK     | 42,7194   | 81,8586  | 0,938243      | -1,82386      | 0,0681729  | 0,221311   | no  |
| AN8288 | ChrII_A_nidulans_FGSC_A4:1392631-1399168 | WT_5hasex | WT_veg | OK     | 17,713    | 28,2085  | 0,671323      | -1,31493      | 0,188535   | 0,438539   | no  |
| AN8289 | ChrII_A_nidulans_FGSC_A4:1392631-1399168 | WT_5hasex | WT_veg | OK     | 72,765    | 143,638  | 0,981125      | -1,928        | 0,053855   | 0,187013   | no  |
| AN8290 | ChrII_A_nidulans_FGSC_A4:1400856-1404602 | WT_5hasex | WT_veg | OK     | 179,547   | 306,209  | 0,770159      | -1,51759      | 0,129119   | 0,343786   | no  |
| AN8291 | ChrII_A_nidulans_FGSC_A4:1400856-1404602 | WT_5hasex | WT_veg | OK     | 36,7591   | 58,8713  | 0,679464      | -1,33096      | 0,183201   | 0,430943   | no  |
| AN8292 | ChrII_A_nidulans_FGSC_A4:1407091-1409040 | WT_5hasex | WT_veg | OK     | 16,1271   | 25,4501  | 0,658182      | -1,2292       | 0,218998   | 0,479859   | no  |



## Supplementary table 1

|        |                                          |           |        |        |           |            |               |               |            |            |      |
|--------|------------------------------------------|-----------|--------|--------|-----------|------------|---------------|---------------|------------|------------|------|
| AN8293 | ChrII_A_nidulans_FGSC_A4:1409117-1412511 | WT_5hasex | WT_veg | OK     | 40,1821   | 99,918     | 1,31419       | -2,72577      | 0,00641511 | 0,0365079  | yes  |
| AN8295 | ChrV_A_nidulans_FGSC_A4:13364-15076      | WT_5hasex | WT_veg | NOTEST | 0,0511418 | 0,227348   | 2,15232       | -0,262378     | 0,79303    |            | 1 no |
| AN8298 | ChrV_A_nidulans_FGSC_A4:25940-27601      | WT_5hasex | WT_veg | OK     | 8,25829   | 15,0721    | 0,867966      | -1,34977      | 0,177089   | 0,422041   | no   |
| AN8299 | ChrV_A_nidulans_FGSC_A4:29532-30286      | WT_5hasex | WT_veg | NOTEST | 0,75997   | 1,22752    | 0,691732      | -0,436606     | 0,662397   |            | 1 no |
| AN8300 | ChrV_A_nidulans_FGSC_A4:32704-38884      | WT_5hasex | WT_veg | NOTEST | 0,478171  | 1,28758    | 1,42907       | -1,85058      | 0,0642298  |            | 1 no |
| AN8301 | ChrV_A_nidulans_FGSC_A4:40523-44383      | WT_5hasex | WT_veg | NOTEST | 0         | 0          | 0             | 0             | 1          |            | 1 no |
| AN8302 | ChrV_A_nidulans_FGSC_A4:45420-47341      | WT_5hasex | WT_veg | NOTEST | 0,243601  | 0,0961821  | -1,34068      | 0,428033      | 0,668627   |            | 1 no |
| AN8303 | ChrV_A_nidulans_FGSC_A4:47777-50361      | WT_5hasex | WT_veg | NOTEST | 1,18876   | 0,48007    | -1,30814      | 0,905594      | 0,365151   |            | 1 no |
| AN8304 | ChrV_A_nidulans_FGSC_A4:50469-54313      | WT_5hasex | WT_veg | NOTEST | 0,772644  | 1,14308    | 0,565057      | -0,610599     | 0,541465   |            | 1 no |
| AN8305 | ChrV_A_nidulans_FGSC_A4:59999-60923      | WT_5hasex | WT_veg | NOTEST | 0,192947  | 0,602549   | 1,64288       | -0,572042     | 0,567294   |            | 1 no |
| AN8306 | ChrV_A_nidulans_FGSC_A4:62954-64094      | WT_5hasex | WT_veg | NOTEST | 1,48624   | 0,983855   | -0,595153     | 0,385402      | 0,69994    |            | 1 no |
| AN8307 | ChrV_A_nidulans_FGSC_A4:64678-65545      | WT_5hasex | WT_veg | OK     | 12,142    | 35,2096    | 1,53596       | -2,46553      | 0,0136809  | 0,0665715  | no   |
| AN8308 | ChrV_A_nidulans_FGSC_A4:69779-70236      | WT_5hasex | WT_veg | OK     | 285,408   | 12,347     | -4,5308       | 7,1036        | 1,2155E-12 | 6,7615E-11 | yes  |
| AN8310 | ChrV_A_nidulans_FGSC_A4:80003-81524      | WT_5hasex | WT_veg | NOTEST | 0,16734   | 0          | -1.79769e+308 | -1.79769e+308 | 0,224063   |            | 1 no |
| AN8311 | ChrV_A_nidulans_FGSC_A4:84192-85070      | WT_5hasex | WT_veg | OK     | 20,2072   | 11,8842    | -0,765827     | 1,22554       | 0,220372   | 0,481827   | no   |
| AN8312 | ChrV_A_nidulans_FGSC_A4:89483-90171      | WT_5hasex | WT_veg | NOTEST | 0,371553  | 1,37066    | 1,88323       | -0,8284       | 0,407444   |            | 1 no |
| AN8313 | ChrV_A_nidulans_FGSC_A4:93547-95775      | WT_5hasex | WT_veg | NOTEST | 0         | 0          | 0             | 0             | 1          |            | 1 no |
| AN8314 | ChrV_A_nidulans_FGSC_A4:97877-102864     | WT_5hasex | WT_veg | OK     | 30,0218   | 2,21908    | -3,75798      | 7,10887       | 1,17E-12   | 6,5291E-11 | yes  |
| AN8315 | ChrV_A_nidulans_FGSC_A4:103629-105148    | WT_5hasex | WT_veg | NOTEST | 0,804247  | 1,36783    | 0,766175      | -0,622352     | 0,53371    |            | 1 no |
| AN8316 | ChrV_A_nidulans_FGSC_A4:106020-107814    | WT_5hasex | WT_veg | NOTEST | 0,449462  | 0          | -1.79769e+308 | -1.79769e+308 | 0,0540986  |            | 1 no |
| AN8317 | ChrV_A_nidulans_FGSC_A4:108538-111183    | WT_5hasex | WT_veg | NOTEST | 0         | 0          | 0             | 0             | 1          |            | 1 no |
| AN8318 | ChrV_A_nidulans_FGSC_A4:111422-113162    | WT_5hasex | WT_veg | NOTEST | 0         | 0          | 0             | 0             | 1          |            | 1 no |
| AN8319 | ChrV_A_nidulans_FGSC_A4:114199-115493    | WT_5hasex | WT_veg | NOTEST | 0         | 0          | 0             | 0             | 1          |            | 1 no |
| AN8320 | ChrV_A_nidulans_FGSC_A4:115814-116267    | WT_5hasex | WT_veg | NOTEST | 0         | 0          | 0             | 0             | 1          |            | 1 no |
| AN8321 | ChrV_A_nidulans_FGSC_A4:117290-118260    | WT_5hasex | WT_veg | NOTEST | 0         | 0          | 0             | 0             | 1          |            | 1 no |
| AN8322 | ChrV_A_nidulans_FGSC_A4:118394-122137    | WT_5hasex | WT_veg | NOTEST | 1,75331   | 3,7201     | 1,08526       | -1,55913      | 0,118966   |            | 1 no |
| AN8323 | ChrV_A_nidulans_FGSC_A4:124767-126263    | WT_5hasex | WT_veg | OK     | 6,7043    | 12,6882    | 0,920329      | -1,34373      | 0,179037   | 0,424675   | no   |
| AN8324 | ChrV_A_nidulans_FGSC_A4:128558-130493    | WT_5hasex | WT_veg | NOTEST | 0,614572  | 0,773422   | 0,331674      | -0,193565     | 0,846517   |            | 1 no |
| AN8325 | ChrV_A_nidulans_FGSC_A4:130877-132277    | WT_5hasex | WT_veg | NOTEST | 0,773654  | 0,799281   | 0,0470157     | -0,0290596    | 0,976817   |            | 1 no |
| AN8326 | ChrV_A_nidulans_FGSC_A4:134287-134569    | WT_5hasex | WT_veg | OK     | 13,8387   | 2,69213    | -2,36189      | 1,59172       | 0,111447   | 0,311834   | no   |
| AN8328 | ChrV_A_nidulans_FGSC_A4:144997-146205    | WT_5hasex | WT_veg | NOTEST | 1,39325   | 1,43723    | 0,0448359     | -0,0392721    | 0,968673   |            | 1 no |
| AN8329 | ChrV_A_nidulans_FGSC_A4:146678-148714    | WT_5hasex | WT_veg | NOTEST | 1,51233   | 1,29587    | -0,222857     | 0,228181      | 0,819506   |            | 1 no |
| AN8330 | ChrV_A_nidulans_FGSC_A4:148851-150000    | WT_5hasex | WT_veg | OK     | 19,19     | 33,119     | 0,787301      | -1,41261      | 0,157771   | 0,391974   | no   |
| AN8332 | ChrV_A_nidulans_FGSC_A4:153993-155047    | WT_5hasex | WT_veg | NOTEST | 0,330804  | 0          | -1.79769e+308 | -1.79769e+308 | 0,165569   |            | 1 no |
| AN8334 | ChrV_A_nidulans_FGSC_A4:158087-160077    | WT_5hasex | WT_veg | NOTEST | 1,01169   | 2,86447    | 1,5015        | -1,4986       | 0,133976   |            | 1 no |
| AN8335 | ChrV_A_nidulans_FGSC_A4:161450-162305    | WT_5hasex | WT_veg | NOTEST | 0         | 0          | 0             | 0             | 1          |            | 1 no |
| AN8336 | ChrV_A_nidulans_FGSC_A4:162604-163589    | WT_5hasex | WT_veg | NOTEST | 1,29244   | 0          | -1.79769e+308 | -1.79769e+308 | 0,0587576  |            | 1 no |
| AN8337 | ChrV_A_nidulans_FGSC_A4:166227-167283    | WT_5hasex | WT_veg | OK     | 83,3527   | 5,44774    | -3,9355       | 6,04035       | 1,5378E-09 | 5,2056E-08 | yes  |
| AN8339 | ChrV_A_nidulans_FGSC_A4:169721-171028    | WT_5hasex | WT_veg | OK     | 497,699   | 2892,51    | 2,53897       | -4,49821      | 6,8527E-06 | 0,00010272 | yes  |
| AN8340 | ChrV_A_nidulans_FGSC_A4:173587-175564    | WT_5hasex | WT_veg | OK     | 2,90445   | 0,740791   | -1,97112      | 1,66367       | 0,0961792  | 0,281705   | no   |
| AN8341 | ChrV_A_nidulans_FGSC_A4:175874-177808    | WT_5hasex | WT_veg | OK     | 4,8919    | 7,28555    | 0,574642      | -0,884475     | 0,37644    | 0,651094   | no   |
| AN8342 | ChrV_A_nidulans_FGSC_A4:178355-179950    | WT_5hasex | WT_veg | NOTEST | 1,84819   | 0          | -1.79769e+308 | -1.79769e+308 | 0,0254301  |            | 1 no |
| AN8344 | ChrV_A_nidulans_FGSC_A4:181039-185634    | WT_5hasex | WT_veg | OK     | 5,07963   | 13,1105    | 1,36793       | -2,48333      | 0,013016   | 0,0641245  | no   |
| AN8345 | ChrV_A_nidulans_FGSC_A4:186010-188539    | WT_5hasex | WT_veg | OK     | 1,28799   | 5,80236    | 2,17152       | -2,85392      | 0,00431829 | 0,0264292  | yes  |
| AN8346 | ChrV_A_nidulans_FGSC_A4:189923-191319    | WT_5hasex | WT_veg | OK     | 92,5064   | 147,91     | 0,677096      | -1,28305      | 0,199475   | 0,453566   | no   |
| AN8347 | ChrV_A_nidulans_FGSC_A4:192440-194330    | WT_5hasex | WT_veg | NOTEST | 0,739442  | 1,02686    | 0,473731      | -0,40806      | 0,68323    |            | 1 no |
| AN8349 | ChrV_A_nidulans_FGSC_A4:197440-199634    | WT_5hasex | WT_veg | NOTEST | 1,02209   | 1,21161    | 0,245399      | -0,2156       | 0,8293     |            | 1 no |
| AN8351 | ChrV_A_nidulans_FGSC_A4:202080-204334    | WT_5hasex | WT_veg | NOTEST | 0,370087  | 2,0445E-05 | -14,1439      | 0,000955476   | 0,999238   |            | 1 no |
| AN8352 | ChrV_A_nidulans_FGSC_A4:204877-206510    | WT_5hasex | WT_veg | NOTEST | 0         | 0,777348   | 1.79769e+308  | 1.79769e+308  | 0,123323   |            | 1 no |
| AN8353 | ChrV_A_nidulans_FGSC_A4:207088-208070    | WT_5hasex | WT_veg | NOTEST | 0         | 0          | 0             | 0             | 1          |            | 1 no |
| AN8354 | ChrV_A_nidulans_FGSC_A4:208216-209237    | WT_5hasex | WT_veg | NOTEST | 0,225534  | 3,67239    | 4,02531       | -1,92092      | 0,0547418  |            | 1 no |
| AN8355 | ChrV_A_nidulans_FGSC_A4:209502-211297    | WT_5hasex | WT_veg | NOTEST | 0,86875   | 2,28983    | 1,39823       | -1,51495      | 0,129786   |            | 1 no |
| AN8356 | ChrV_A_nidulans_FGSC_A4:211455-212669    | WT_5hasex | WT_veg | NOTEST | 1,7792    | 1,93949    | 0,124449      | -0,12964      | 0,896851   |            | 1 no |

## Supplementary table 1

|        |                                       |           |        |        |          |           |               |               |            |            |     |
|--------|---------------------------------------|-----------|--------|--------|----------|-----------|---------------|---------------|------------|------------|-----|
| AN8357 | ChrV_A_nidulans_FGSC_A4:213553-215890 | WT_5hasex | WT_veg | NOTEST | 0,710895 | 1,33569   | 0,909875      | -0,945588     | 0,344359   | 1          | no  |
| AN8359 | ChrV_A_nidulans_FGSC_A4:218124-219643 | WT_5hasex | WT_veg | NOTEST | 0,321623 | 1,20092   | 1,90069       | -1,34311      | 0,179236   | 1          | no  |
| AN8360 | ChrV_A_nidulans_FGSC_A4:223260-224118 | WT_5hasex | WT_veg | OK     | 4,44482  | 10,3211   | 1,2154        | -1,64597      | 0,0997692  | 0,288836   | no  |
| AN8361 | ChrV_A_nidulans_FGSC_A4:225326-228441 | WT_5hasex | WT_veg | OK     | 14,1223  | 33,7633   | 1,25748       | -2,35738      | 0,0184045  | 0,0835696  | no  |
| AN8362 | ChrV_A_nidulans_FGSC_A4:228655-229672 | WT_5hasex | WT_veg | OK     | 57,197   | 131,802   | 1,20436       | -2,38795      | 0,0169426  | 0,0785966  | no  |
| AN8363 | ChrV_A_nidulans_FGSC_A4:230406-232541 | WT_5hasex | WT_veg | OK     | 25,2738  | 41,204    | 0,705139      | -1,33843      | 0,180756   | 0,427261   | no  |
| AN8364 | ChrV_A_nidulans_FGSC_A4:233426-234186 | WT_5hasex | WT_veg | OK     | 2,28269  | 1,52812   | -0,578982     | 0,463158      | 0,643251   | 0,83789    | no  |
| AN8365 | ChrV_A_nidulans_FGSC_A4:235927-237935 | WT_5hasex | WT_veg | OK     | 28,6118  | 4,36926   | -2,71115      | 4,65215       | 3,2849E-06 | 5,3382E-05 | yes |
| AN8366 | ChrV_A_nidulans_FGSC_A4:243479-244811 | WT_5hasex | WT_veg | OK     | 96,1474  | 18,0923   | -2,40987      | 4,83952       | 1,3015E-06 | 2,3293E-05 | yes |
| AN8367 | ChrV_A_nidulans_FGSC_A4:254351-255377 | WT_5hasex | WT_veg | OK     | 25,6207  | 55,8233   | 1,12356       | -1,98858      | 0,0467473  | 0,169397   | no  |
| AN8368 | ChrV_A_nidulans_FGSC_A4:255598-257324 | WT_5hasex | WT_veg | OK     | 14,6628  | 43,5486   | 1,57047       | -2,71523      | 0,00662292 | 0,0374667  | yes |
| AN8369 | ChrV_A_nidulans_FGSC_A4:258021-266816 | WT_5hasex | WT_veg | OK     | 7,42836  | 17,1548   | 1,2075        | -2,50743      | 0,0121613  | 0,0607982  | no  |
| AN8370 | ChrV_A_nidulans_FGSC_A4:268282-270713 | WT_5hasex | WT_veg | NOTEST | 1,42282  | 2,91515   | 1,03482       | -1,17045      | 0,24182    | 1          | no  |
| AN8371 | ChrV_A_nidulans_FGSC_A4:272732-273608 | WT_5hasex | WT_veg | NOTEST | 0        | 0         | 0             | 0             | 1          | 1          | no  |
| AN8372 | ChrV_A_nidulans_FGSC_A4:274911-276173 | WT_5hasex | WT_veg | OK     | 1,28949  | 9,59462   | 2,89542       | -2,9901       | 0,00278885 | 0,0183918  | yes |
| AN8373 | ChrV_A_nidulans_FGSC_A4:277514-278235 | WT_5hasex | WT_veg | OK     | 1,56952  | 4,8587    | 1,63025       | -1,61867      | 0,105519   | 0,300724   | no  |
| AN8374 | ChrV_A_nidulans_FGSC_A4:278314-281501 | WT_5hasex | WT_veg | OK     | 6,08984  | 0,4462    | -3,77064      | 3,35146       | 0,00080387 | 0,00651979 | yes |
| AN8375 | ChrV_A_nidulans_FGSC_A4:283028-283661 | WT_5hasex | WT_veg | NOTEST | 0        | 0         | 0             | 0             | 1          | 1          | no  |
| AN8376 | ChrV_A_nidulans_FGSC_A4:285082-286224 | WT_5hasex | WT_veg | NOTEST | 1,46686  | 0,86491   | -0,762108     | 0,495721      | 0,620091   | 1          | no  |
| AN8377 | ChrV_A_nidulans_FGSC_A4:287760-288917 | WT_5hasex | WT_veg | NOTEST | 0,808532 | 0         | -1.79769e+308 | -1.79769e+308 | 0,0908325  | 1          | no  |
| AN8378 | ChrV_A_nidulans_FGSC_A4:292549-293891 | WT_5hasex | WT_veg | NOTEST | 0        | 0         | 0             | 0             | 1          | 1          | no  |
| AN8379 | ChrV_A_nidulans_FGSC_A4:298124-301050 | WT_5hasex | WT_veg | NOTEST | 0,111368 | 0,0890122 | -0,323263     | 0,0930414     | 0,925871   | 1          | no  |
| AN8381 | ChrV_A_nidulans_FGSC_A4:303033-305865 | WT_5hasex | WT_veg | NOTEST | 0,285012 | 0,390828  | 0,455512      | -0,290311     | 0,771578   | 1          | no  |
| AN8382 | ChrV_A_nidulans_FGSC_A4:306120-307093 | WT_5hasex | WT_veg | NOTEST | 0        | 0         | 0             | 0             | 1          | 1          | no  |
| AN8384 | ChrV_A_nidulans_FGSC_A4:316890-318138 | WT_5hasex | WT_veg | OK     | 2,4297   | 0,765837  | -1,66567      | 1,16507       | 0,243992   | 0,511396   | no  |
| AN8385 | ChrV_A_nidulans_FGSC_A4:319969-320587 | WT_5hasex | WT_veg | NOTEST | 0        | 0         | 0             | 0             | 1          | 1          | no  |
| AN8387 | ChrV_A_nidulans_FGSC_A4:328334-328999 | WT_5hasex | WT_veg | NOTEST | 0        | 0         | 0             | 0             | 1          | 1          | no  |
| AN8388 | ChrV_A_nidulans_FGSC_A4:331636-333065 | WT_5hasex | WT_veg | NOTEST | 0,542947 | 1,24912   | 1,20202       | -0,917519     | 0,358871   | 1          | no  |
| AN8389 | ChrV_A_nidulans_FGSC_A4:333737-335287 | WT_5hasex | WT_veg | OK     | 7,74942  | 4,24007   | -0,869998     | 1,27642       | 0,201808   | 0,457149   | no  |
| AN8390 | ChrV_A_nidulans_FGSC_A4:335435-336451 | WT_5hasex | WT_veg | OK     | 4,02436  | 2,81438   | -0,515941     | 0,533093      | 0,593969   | 0,809329   | no  |
| AN8391 | ChrV_A_nidulans_FGSC_A4:338955-340897 | WT_5hasex | WT_veg | OK     | 5,20717  | 29,3771   | 2,49612       | -3,80322      | 0,00014283 | 0,00149091 | yes |
| AN8393 | ChrV_A_nidulans_FGSC_A4:346025-346460 | WT_5hasex | WT_veg | NOTEST | 0        | 0         | 0             | 0             | 1          | 1          | no  |
| AN8394 | ChrV_A_nidulans_FGSC_A4:347625-349417 | WT_5hasex | WT_veg | NOTEST | 0        | 0         | 0             | 0             | 1          | 1          | no  |
| AN8395 | ChrV_A_nidulans_FGSC_A4:349839-350832 | WT_5hasex | WT_veg | NOTEST | 0,245317 | 1,04837   | 2,09543       | -0,881466     | 0,378066   | 1          | no  |
| AN8397 | ChrV_A_nidulans_FGSC_A4:358016-358629 | WT_5hasex | WT_veg | NOTEST | 0        | 1,12658   | 1.79769e+308  | 1.79769e+308  | 0,134707   | 1          | no  |
| AN8398 | ChrV_A_nidulans_FGSC_A4:358992-360569 | WT_5hasex | WT_veg | NOTEST | 1,32974  | 2,56038   | 0,945213      | -1,07903      | 0,280576   | 1          | no  |
| AN8399 | ChrV_A_nidulans_FGSC_A4:361087-364883 | WT_5hasex | WT_veg | OK     | 15,9044  | 1,79388   | -3,14827      | 5,57445       | 2,4831E-08 | 6,6017E-07 | yes |
| AN8400 | ChrV_A_nidulans_FGSC_A4:365799-368048 | WT_5hasex | WT_veg | NOTEST | 0,875541 | 2,89371   | 1,72467       | -1,83554      | 0,0664264  | 1          | no  |
| AN8402 | ChrV_A_nidulans_FGSC_A4:373515-374142 | WT_5hasex | WT_veg | OK     | 18,0403  | 71,7653   | 1,99206       | -3,10849      | 0,00188048 | 0,0132519  | yes |
| AN8403 | ChrV_A_nidulans_FGSC_A4:374555-375556 | WT_5hasex | WT_veg | OK     | 2,84947  | 17,8591   | 2,6479        | -3,37684      | 0,00073324 | 0,00602716 | yes |
| AN8404 | ChrV_A_nidulans_FGSC_A4:375996-376704 | WT_5hasex | WT_veg | NOTEST | 0        | 0         | 0             | 0             | 1          | 1          | no  |
| AN8405 | ChrV_A_nidulans_FGSC_A4:377549-379483 | WT_5hasex | WT_veg | NOTEST | 0,112483 | 0         | -1.79769e+308 | -1.79769e+308 | 0,23809    | 1          | no  |
| AN8406 | ChrV_A_nidulans_FGSC_A4:381287-382489 | WT_5hasex | WT_veg | OK     | 35,9828  | 54,5909   | 0,601354      | -1,16667      | 0,243342   | 0,510535   | no  |
| AN8407 | ChrV_A_nidulans_FGSC_A4:383361-384713 | WT_5hasex | WT_veg | OK     | 55,7491  | 115,874   | 1,05554       | -2,16658      | 0,0302669  | 0,122121   | no  |
| AN8417 | ChrV_A_nidulans_FGSC_A4:423354-425238 | WT_5hasex | WT_veg | OK     | 1,32614  | 5,87963   | 2,14849       | -2,58032      | 0,00987083 | 0,0515601  | no  |
| AN8418 | ChrV_A_nidulans_FGSC_A4:425556-427209 | WT_5hasex | WT_veg | OK     | 5,58201  | 16,4122   | 1,55591       | -2,448        | 0,014365   | 0,0691742  | no  |
| AN8419 | ChrV_A_nidulans_FGSC_A4:430071-431018 | WT_5hasex | WT_veg | NOTEST | 0        | 0         | 0             | 0             | 1          | 1          | no  |
| AN8420 | ChrV_A_nidulans_FGSC_A4:432327-432792 | WT_5hasex | WT_veg | OK     | 3,87274  | 6,82516   | 0,81751       | -0,833575     | 0,404521   | 0,675624   | no  |
| AN8422 | ChrV_A_nidulans_FGSC_A4:437965-438715 | WT_5hasex | WT_veg | OK     | 37,2719  | 40,9332   | 0,135184      | -0,230344     | 0,817825   | 0,927067   | no  |
| AN8423 | ChrV_A_nidulans_FGSC_A4:442672-444591 | WT_5hasex | WT_veg | NOTEST | 0        | 0         | 0             | 0             | 1          | 1          | no  |
| AN8424 | ChrV_A_nidulans_FGSC_A4:445135-447261 | WT_5hasex | WT_veg | NOTEST | 0,329545 | 0         | -1.79769e+308 | -1.79769e+308 | 0,0537957  | 1          | no  |
| AN8426 | ChrV_A_nidulans_FGSC_A4:451553-454078 | WT_5hasex | WT_veg | NOTEST | 0,427033 | 2,39231   | 2,48599       | -2,5539       | 0,0106524  | 1          | no  |
| AN8427 | ChrV_A_nidulans_FGSC_A4:456113-456793 | WT_5hasex | WT_veg | NOTEST | 0,348512 | 0         | -1.79769e+308 | -1.79769e+308 | 0,23809    | 1          | no  |

## Supplementary table 1

|        |                                       |           |        |        |           |           |               |               |            |            |     |
|--------|---------------------------------------|-----------|--------|--------|-----------|-----------|---------------|---------------|------------|------------|-----|
| AN8428 | ChrV_A_nidulans_FGSC_A4:457627-458366 | WT_5hasex | WT_veg | OK     | 0,436912  | 4,85883   | 3,47519       | -1,73341      | 0,0830236  | 0,254436   | no  |
| AN8429 | ChrV_A_nidulans_FGSC_A4:458655-459200 | WT_5hasex | WT_veg | OK     | 0,743072  | 8,38342   | 3,49597       | -2,46929      | 0,0135383  | 0,0660491  | no  |
| AN8430 | ChrV_A_nidulans_FGSC_A4:461435-462726 | WT_5hasex | WT_veg | OK     | 46,9438   | 2,8391    | -0,428079     | 0,802373      | 0,422337   | 0,690288   | no  |
| AN8431 | ChrV_A_nidulans_FGSC_A4:462985-464820 | WT_5hasex | WT_veg | OK     | 12,5957   | 9,71817   | -0,37418      | 0,649167      | 0,51623    | 0,76045    | no  |
| AN8432 | ChrV_A_nidulans_FGSC_A4:464891-466946 | WT_5hasex | WT_veg | NOTEST | 0,740407  | 0,0864687 | -3,09807      | 1,02937       | 0,303308   | 1          | no  |
| AN8433 | ChrV_A_nidulans_FGSC_A4:469045-471581 | WT_5hasex | WT_veg | NOTEST | 1,96031   | 3,19956   | 0,706787      | -0,818357     | 0,413153   | 1          | no  |
| AN8434 | ChrV_A_nidulans_FGSC_A4:473504-475123 | WT_5hasex | WT_veg | NOTEST | 0,156083  | 0         | -1.79769e+308 | -1.79769e+308 | 0,224063   | 1          | no  |
| AN8435 | ChrV_A_nidulans_FGSC_A4:475784-478704 | WT_5hasex | WT_veg | NOTEST | 0,0837541 | 0,698149  | 3,0593        | -1,50622      | 0,132011   | 1          | no  |
| AN8436 | ChrV_A_nidulans_FGSC_A4:480381-480907 | WT_5hasex | WT_veg | OK     | 4,79021   | 1,89218   | -1,34004      | 0,929424      | 0,35267    | 0,628135   | no  |
| AN8439 | ChrV_A_nidulans_FGSC_A4:485591-486603 | WT_5hasex | WT_veg | OK     | 10,9417   | 4,27106   | -1,35717      | 1,62075       | 0,10507    | 0,299787   | no  |
| AN8441 | ChrV_A_nidulans_FGSC_A4:491817-494067 | WT_5hasex | WT_veg | NOTEST | 1,21219   | 1,15306   | -0,0721533    | 0,0797327     | 0,93645    | 1          | no  |
| AN8442 | ChrV_A_nidulans_FGSC_A4:494923-495565 | WT_5hasex | WT_veg | NOTEST | 0,412169  | 0         | -1.79769e+308 | -1.79769e+308 | 0,224063   | 1          | no  |
| AN8443 | ChrV_A_nidulans_FGSC_A4:498773-499928 | WT_5hasex | WT_veg | OK     | 14,3047   | 8,47398   | -0,755381     | 1,22568       | 0,220319   | 0,481732   | no  |
| AN8445 | ChrV_A_nidulans_FGSC_A4:505695-507300 | WT_5hasex | WT_veg | OK     | 45,2719   | 127,777   | 1,49694       | -2,37475      | 0,0175609  | 0,0806721  | no  |
| AN8446 | ChrV_A_nidulans_FGSC_A4:510124-511615 | WT_5hasex | WT_veg | NOTEST | 0,466741  | 0,566272  | 0,278873      | -0,181741     | 0,855786   | 1          | no  |
| AN8447 | ChrV_A_nidulans_FGSC_A4:511888-514082 | WT_5hasex | WT_veg | NOTEST | 0,125205  | 0,431956  | 1,78659       | -0,785891     | 0,431931   | 1          | no  |
| AN8448 | ChrV_A_nidulans_FGSC_A4:514469-516163 | WT_5hasex | WT_veg | NOTEST | 0,172185  | 0,927106  | 2,42878       | -1,17312      | 0,240749   | 1          | no  |
| AN8449 | ChrV_A_nidulans_FGSC_A4:517501-520798 | WT_5hasex | WT_veg | NOTEST | 0,249914  | 0,519969  | 1,05699       | -0,918472     | 0,358372   | 1          | no  |
| AN8451 | ChrV_A_nidulans_FGSC_A4:529834-531004 | WT_5hasex | WT_veg | OK     | 5,83172   | 2,27542   | -1,35779      | 1,58886       | 0,112092   | 0,312977   | no  |
| AN8452 | ChrV_A_nidulans_FGSC_A4:531961-533303 | WT_5hasex | WT_veg | NOTEST | 1,18276   | 0,144736  | -3,03067      | 1,00495       | 0,314919   | 1          | no  |
| AN8454 | ChrV_A_nidulans_FGSC_A4:538053-540419 | WT_5hasex | WT_veg | OK     | 25,5067   | 88,2333   | 1,79045       | -2,99917      | 0,00270719 | 0,0179345  | yes |
| AN8455 | ChrV_A_nidulans_FGSC_A4:541023-543575 | WT_5hasex | WT_veg | OK     | 14,7352   | 40,1506   | 1,44615       | -2,73202      | 0,00629469 | 0,0359318  | yes |
| AN8456 | ChrV_A_nidulans_FGSC_A4:546910-547492 | WT_5hasex | WT_veg | NOTEST | 0         | 0         | 0             | 0             | 1          | 1          | no  |
| AN8457 | ChrV_A_nidulans_FGSC_A4:547968-551571 | WT_5hasex | WT_veg | OK     | 5,53535   | 21,2011   | 1,93739       | -3,10028      | 0,0019334  | 0,0135701  | yes |
| AN8458 | ChrV_A_nidulans_FGSC_A4:554126-554519 | WT_5hasex | WT_veg | OK     | 1,96332   | 2,79062   | 0,507291      | -0,323312     | 0,746459   | 0,89365    | no  |
| AN8459 | ChrV_A_nidulans_FGSC_A4:555756-557548 | WT_5hasex | WT_veg | OK     | 20,258    | 0,560254  | -5,17626      | 3,702         | 0,00021391 | 0,00211096 | yes |
| AN8460 | ChrV_A_nidulans_FGSC_A4:558350-560357 | WT_5hasex | WT_veg | OK     | 2,1089    | 2,78641   | 0,401915      | -0,530126     | 0,596025   | 0,810696   | no  |
| AN8461 | ChrV_A_nidulans_FGSC_A4:560956-562287 | WT_5hasex | WT_veg | OK     | 554,285   | 1815,62   | 1,711176      | -3,02271      | 0,00250523 | 0,0168306  | yes |
| AN8462 | ChrV_A_nidulans_FGSC_A4:563393-564479 | WT_5hasex | WT_veg | OK     | 126,541   | 251,062   | 0,988437      | -1,84617      | 0,064867   | 0,213649   | no  |
| AN8463 | ChrV_A_nidulans_FGSC_A4:565967-566914 | WT_5hasex | WT_veg | OK     | 2,63979   | 3,15206   | 0,255876      | -0,277489     | 0,781405   | 0,910773   | no  |
| AN8464 | ChrV_A_nidulans_FGSC_A4:569860-571542 | WT_5hasex | WT_veg | NOTEST | 0,144181  | 0         | -1.79769e+308 | -1.79769e+308 | 0,23809    | 1          | no  |
| AN8466 | ChrV_A_nidulans_FGSC_A4:577236-578317 | WT_5hasex | WT_veg | NOTEST | 0         | 0         | 0             | 0             | 1          | 1          | no  |
| AN8467 | ChrV_A_nidulans_FGSC_A4:581502-583273 | WT_5hasex | WT_veg | NOTEST | 0,127786  | 0,506392  | 1,98653       | -0,835658     | 0,403348   | 1          | no  |
| AN8468 | ChrV_A_nidulans_FGSC_A4:584599-588797 | WT_5hasex | WT_veg | NOTEST | 0,793277  | 1,10562   | 0,478962      | -0,603089     | 0,54645    | 1          | no  |
| AN8469 | ChrV_A_nidulans_FGSC_A4:590706-592755 | WT_5hasex | WT_veg | NOTEST | 0,784551  | 3,24661   | 2,04899       | -2,28236      | 0,0224682  | 1          | no  |
| AN8470 | ChrV_A_nidulans_FGSC_A4:592775-594080 | WT_5hasex | WT_veg | NOTEST | 0         | 1,34104   | 1.79769e+308  | 1.79769e+308  | 0,036343   | 1          | no  |
| AN8471 | ChrV_A_nidulans_FGSC_A4:594400-595747 | WT_5hasex | WT_veg | NOTEST | 0,415902  | 1,38337   | 1,73388       | -1,12875      | 0,259004   | 1          | no  |
| AN8472 | ChrV_A_nidulans_FGSC_A4:596081-597246 | WT_5hasex | WT_veg | NOTEST | 0,491501  | 0         | -1.79769e+308 | -1.79769e+308 | 0,0654719  | 1          | no  |
| AN8473 | ChrV_A_nidulans_FGSC_A4:597625-599920 | WT_5hasex | WT_veg | NOTEST | 0         | 0         | 0             | 0             | 1          | 1          | no  |
| AN8474 | ChrV_A_nidulans_FGSC_A4:600981-602824 | WT_5hasex | WT_veg | NOTEST | 0         | 0,473045  | 1.79769e+308  | 1.79769e+308  | 0,123323   | 1          | no  |
| AN8475 | ChrV_A_nidulans_FGSC_A4:603637-604878 | WT_5hasex | WT_veg | NOTEST | 0,890945  | 0         | -1.79769e+308 | -1.79769e+308 | 0,0374675  | 1          | no  |
| AN8476 | ChrV_A_nidulans_FGSC_A4:605342-607168 | WT_5hasex | WT_veg | NOTEST | 0         | 0,0999207 | 1.79769e+308  | 1.79769e+308  | 0,309884   | 1          | no  |
| AN8477 | ChrV_A_nidulans_FGSC_A4:607701-609388 | WT_5hasex | WT_veg | OK     | 2,94702   | 4,50621   | 0,612659      | -0,763202     | 0,445343   | 0,708638   | no  |
| AN8478 | ChrV_A_nidulans_FGSC_A4:610916-612389 | WT_5hasex | WT_veg | OK     | 15,718    | 34,5134   | 1,13474       | -1,89238      | 0,0584408  | 0,198369   | no  |
| AN8479 | ChrV_A_nidulans_FGSC_A4:612860-615622 | WT_5hasex | WT_veg | OK     | 2,80181   | 10,6707   | 1,92922       | -2,99703      | 0,00272625 | 0,018038   | yes |
| AN8480 | ChrV_A_nidulans_FGSC_A4:620014-624544 | WT_5hasex | WT_veg | NOTEST | 0,040823  | 0,380664  | 3,22106       | -1,90802      | 0,056389   | 1          | no  |
| AN8481 | ChrV_A_nidulans_FGSC_A4:626579-631613 | WT_5hasex | WT_veg | OK     | 4,8921    | 11,8745   | 1,27934       | -2,22052      | 0,0263835  | 0,109927   | no  |
| AN8483 | ChrV_A_nidulans_FGSC_A4:643387-644121 | WT_5hasex | WT_veg | OK     | 9,63598   | 7,07723   | -0,445246     | 0,58436       | 0,558978   | 0,788175   | no  |
| AN8484 | ChrV_A_nidulans_FGSC_A4:646625-648156 | WT_5hasex | WT_veg | NOTEST | 0,525317  | 0,773045  | 0,557364      | -0,432879     | 0,665103   | 1          | no  |
| AN8485 | ChrV_A_nidulans_FGSC_A4:649509-650864 | WT_5hasex | WT_veg | OK     | 106,779   | 229,486   | 1,10377       | -2,28217      | 0,0224791  | 0,0972387  | no  |
| AN8486 | ChrV_A_nidulans_FGSC_A4:652857-654794 | WT_5hasex | WT_veg | OK     | 10,0397   | 24,4947   | 1,28675       | -2,25879      | 0,0238964  | 0,101898   | no  |
| AN8487 | ChrV_A_nidulans_FGSC_A4:655996-657010 | WT_5hasex | WT_veg | NOTEST | 0,634231  | 0         | -1.79769e+308 | -1.79769e+308 | 0,0613422  | 1          | no  |
| AN8488 | ChrV_A_nidulans_FGSC_A4:657307-658120 | WT_5hasex | WT_veg | OK     | 127,972   | 207,598   | 0,697963      | -1,40625      | 0,15965    | 0,394938   | no  |

## Supplementary table 1

|        |                                       |           |        |        |           |          |               |               |            |            |      |
|--------|---------------------------------------|-----------|--------|--------|-----------|----------|---------------|---------------|------------|------------|------|
| AN8490 | ChrV_A_nidulans_FGSC_A4:669376-670552 | WT_5hasex | WT_veg | OK     | 18,5824   | 22,5112  | 0,276707      | -0,482548     | 0,629416   | 0,830029   | no   |
| AN8491 | ChrV_A_nidulans_FGSC_A4:671075-671949 | WT_5hasex | WT_veg | OK     | 41,2094   | 167,052  | 2,01926       | -3,71103      | 0,00020642 | 0,00204786 | yes  |
| AN8492 | ChrV_A_nidulans_FGSC_A4:672169-673327 | WT_5hasex | WT_veg | OK     | 8,37422   | 11,0617  | 0,401542      | -0,52383      | 0,600397   | 0,813476   | no   |
| AN8493 | ChrV_A_nidulans_FGSC_A4:673632-676039 | WT_5hasex | WT_veg | NOTEST | 0,397485  | 1,69021  | 2,08823       | -1,40687      | 0,159466   |            | 1 no |
| AN8494 | ChrV_A_nidulans_FGSC_A4:676437-677564 | WT_5hasex | WT_veg | NOTEST | 0,576095  | 0,59639  | 0,0499475     | -0,0311691    | 0,975135   |            | 1 no |
| AN8495 | ChrV_A_nidulans_FGSC_A4:681211-684024 | WT_5hasex | WT_veg | OK     | 40,1077   | 207,438  | 2,37073       | -4,75027      | 2,0314E-06 | 3,4867E-05 | yes  |
| AN8496 | ChrV_A_nidulans_FGSC_A4:684282-685479 | WT_5hasex | WT_veg | OK     | 39,8824   | 102,088  | 1,35599       | -2,37954      | 0,0173341  | 0,0799035  | no   |
| AN8497 | ChrV_A_nidulans_FGSC_A4:685754-686370 | WT_5hasex | WT_veg | OK     | 121,173   | 284,09   | 1,22928       | -2,48943      | 0,0127948  | 0,063288   | no   |
| AN8498 | ChrV_A_nidulans_FGSC_A4:686531-688751 | WT_5hasex | WT_veg | OK     | 65,6403   | 76,6171  | 0,223086      | -0,422477     | 0,672677   | 0,853977   | no   |
| AN8499 | ChrV_A_nidulans_FGSC_A4:691247-693185 | WT_5hasex | WT_veg | OK     | 53,9654   | 84,7034  | 0,650386      | -1,35373      | 0,175822   | 0,420247   | no   |
| AN8500 | ChrV_A_nidulans_FGSC_A4:693299-694142 | WT_5hasex | WT_veg | OK     | 106,069   | 386,804  | 1,86661       | -3,87489      | 0,00010667 | 0,00116118 | yes  |
| AN8501 | ChrV_A_nidulans_FGSC_A4:695927-698238 | WT_5hasex | WT_veg | OK     | 9,8317    | 16,333   | 0,732276      | -1,29403      | 0,195655   | 0,448331   | no   |
| AN8502 | ChrV_A_nidulans_FGSC_A4:699768-701387 | WT_5hasex | WT_veg | NOTEST | 1,02376   | 1,54245  | 0,591353      | -0,588312     | 0,556323   |            | 1 no |
| AN8503 | ChrV_A_nidulans_FGSC_A4:701815-702416 | WT_5hasex | WT_veg | OK     | 21,0834   | 115,389  | 2,45232       | -3,65558      | 0,0002566  | 0,00247222 | yes  |
| AN8504 | ChrV_A_nidulans_FGSC_A4:703160-705994 | WT_5hasex | WT_veg | NOTEST | 0,170181  | 0,297011 | 0,803447      | -0,471216     | 0,637487   |            | 1 no |
| AN8505 | ChrV_A_nidulans_FGSC_A4:715698-718782 | WT_5hasex | WT_veg | OK     | 18,0206   | 38,714   | 1,10321       | -2,01856      | 0,0435331  | 0,160502   | no   |
| AN8506 | ChrV_A_nidulans_FGSC_A4:719361-721947 | WT_5hasex | WT_veg | OK     | 5,93505   | 4,84391  | -0,293088     | 0,455116      | 0,649026   | 0,840989   | no   |
| AN8507 | ChrV_A_nidulans_FGSC_A4:722252-723855 | WT_5hasex | WT_veg | OK     | 1,77873   | 0,702824 | -1,33961      | 0,873998      | 0,382119   | 0,65618    | no   |
| AN8508 | ChrV_A_nidulans_FGSC_A4:725231-726415 | WT_5hasex | WT_veg | NOTEST | 0         | 0,185961 | 1.79769e+308  | 1.79769e+308  | 0,309884   |            | 1 no |
| AN8509 | ChrV_A_nidulans_FGSC_A4:727222-728785 | WT_5hasex | WT_veg | NOTEST | 0,474213  | 0        | -1.79769e+308 | -1.79769e+308 | 0,0908325  |            | 1 no |
| AN8511 | ChrV_A_nidulans_FGSC_A4:731888-733135 | WT_5hasex | WT_veg | NOTEST | 0         | 0        | 0             | 0             | 1          |            | 1 no |
| AN8512 | ChrV_A_nidulans_FGSC_A4:734168-735426 | WT_5hasex | WT_veg | OK     | 1,67089   | 4,92806  | 1,5604        | -1,6664       | 0,0956344  | 0,2806     | no   |
| AN8521 | ChrV_A_nidulans_FGSC_A4:747264-748591 | WT_5hasex | WT_veg | NOTEST | 0,445618  | 0,639039 | 0,520097      | -0,331749     | 0,740079   |            | 1 no |
| AN8522 | ChrV_A_nidulans_FGSC_A4:748968-750223 | WT_5hasex | WT_veg | OK     | 4,71183   | 0,857287 | -2,45844      | -2,10468      | 0,0353193  | 0,137484   | no   |
| AN8523 | ChrV_A_nidulans_FGSC_A4:750649-751807 | WT_5hasex | WT_veg | OK     | 13,6675   | 15,8172  | 0,210746      | -0,346078     | 0,729284   | 0,885386   | no   |
| AN8524 | ChrV_A_nidulans_FGSC_A4:754337-756808 | WT_5hasex | WT_veg | OK     | 2,07343   | 7,12688  | 1,78125       | -2,31605      | 0,0205557  | 0,0910761  | no   |
| AN8525 | ChrV_A_nidulans_FGSC_A4:757321-758883 | WT_5hasex | WT_veg | OK     | 23,3439   | 5,70236  | -2,03342      | 3,3371        | 0,00084659 | 0,00681983 | yes  |
| AN8526 | ChrV_A_nidulans_FGSC_A4:761069-762521 | WT_5hasex | WT_veg | NOTEST | 0         | 0,56014  | 1.79769e+308  | 1.79769e+308  | 0,123323   |            | 1 no |
| AN8527 | ChrV_A_nidulans_FGSC_A4:764105-764960 | WT_5hasex | WT_veg | NOTEST | 0         | 0        | 0             | 0             | 1          |            | 1 no |
| AN8528 | ChrV_A_nidulans_FGSC_A4:766958-768369 | WT_5hasex | WT_veg | OK     | 28,9986   | 98,5713  | 1,76519       | -3,30174      | 0,00096087 | 0,00759906 | yes  |
| AN8529 | ChrV_A_nidulans_FGSC_A4:768962-770273 | WT_5hasex | WT_veg | NOTEST | 0,179888  | 0,538515 | 1,58189       | -0,656457     | 0,51153    |            | 1 no |
| AN8530 | ChrV_A_nidulans_FGSC_A4:770451-772160 | WT_5hasex | WT_veg | OK     | 2,54278   | 2,57854  | 0,0201476     | -0,024614     | 0,980363   | 0,993176   | no   |
| AN8531 | ChrV_A_nidulans_FGSC_A4:772832-773799 | WT_5hasex | WT_veg | OK     | 21,3643   | 66,4259  | 1,63655       | -2,83735      | 0,004549   | 0,0275803  | yes  |
| AN8532 | ChrV_A_nidulans_FGSC_A4:773889-775002 | WT_5hasex | WT_veg | OK     | 3,95444   | 6,21303  | 0,651824      | -0,845296     | 0,397946   | 0,670606   | no   |
| AN8533 | ChrV_A_nidulans_FGSC_A4:776508-777630 | WT_5hasex | WT_veg | OK     | 8,84391   | 41,3446  | 2,22494       | -3,11782      | 0,00182195 | 0,0129036  | yes  |
| AN8535 | ChrV_A_nidulans_FGSC_A4:786783-788739 | WT_5hasex | WT_veg | OK     | 23,2442   | 39,7687  | 0,774762      | -1,51605      | 0,129506   | 0,344398   | no   |
| AN8536 | ChrV_A_nidulans_FGSC_A4:788894-790551 | WT_5hasex | WT_veg | OK     | 27,128    | 92,8591  | 1,77526       | -3,20486      | 0,00135126 | 0,0100767  | yes  |
| AN8537 | ChrV_A_nidulans_FGSC_A4:791416-793502 | WT_5hasex | WT_veg | OK     | 80,0299   | 29,5247  | -1,43862      | 2,94506       | 0,0032289  | 0,0207863  | yes  |
| AN8538 | ChrV_A_nidulans_FGSC_A4:797554-799178 | WT_5hasex | WT_veg | OK     | 11,6235   | 17,2463  | 0,569237      | -0,975667     | 0,329229   | 0,605752   | no   |
| AN8539 | ChrV_A_nidulans_FGSC_A4:801872-802495 | WT_5hasex | WT_veg | NOTEST | 1,46368   | 1,40797  | -0,055978     | 0,0374944     | 0,970091   |            | 1 no |
| AN8543 | ChrV_A_nidulans_FGSC_A4:814165-814892 | WT_5hasex | WT_veg | OK     | 2,29242   | 0,343248 | -2,73955      | 0,899916      | 0,368165   | 0,642979   | no   |
| AN8544 | ChrV_A_nidulans_FGSC_A4:816827-818612 | WT_5hasex | WT_veg | OK     | 109,375   | 20,2664  | -2,43211      | 4,90171       | 9,5004E-07 | 1,7511E-05 | yes  |
| AN8545 | ChrV_A_nidulans_FGSC_A4:819218-822684 | WT_5hasex | WT_veg | OK     | 3,09879   | 15,5222  | 2,32456       | -3,63974      | 0,00027291 | 0,0026013  | yes  |
| AN8546 | ChrV_A_nidulans_FGSC_A4:823384-827231 | WT_5hasex | WT_veg | OK     | 19,1862   | 60,8003  | 1,66401       | -3,14908      | 0,00163788 | 0,0118253  | yes  |
| AN8547 | ChrV_A_nidulans_FGSC_A4:823384-827231 | WT_5hasex | WT_veg | OK     | 74,9521   | 93,7924  | 0,323502      | -0,662997     | 0,507333   | 0,75457    | no   |
| AN8548 | ChrV_A_nidulans_FGSC_A4:829205-830803 | WT_5hasex | WT_veg | OK     | 94,5314   | 121,983  | 0,367816      | -0,734992     | 0,462345   | 0,721825   | no   |
| AN8549 | ChrV_A_nidulans_FGSC_A4:835020-836220 | WT_5hasex | WT_veg | NOTEST | 0,148832  | 3,46956  | 4,54299       | -2,91359      | 0,00357301 |            | 1 no |
| AN8550 | ChrV_A_nidulans_FGSC_A4:837043-840133 | WT_5hasex | WT_veg | NOTEST | 0,0683345 | 0,318601 | 2,22106       | -1,14626      | 0,251686   |            | 1 no |
| AN8551 | ChrV_A_nidulans_FGSC_A4:840782-842977 | WT_5hasex | WT_veg | NOTEST | 0         | 0,477414 | 1.79769e+308  | 1.79769e+308  | 0,0716995  |            | 1 no |
| AN8553 | ChrV_A_nidulans_FGSC_A4:847260-849477 | WT_5hasex | WT_veg | OK     | 9,39691   | 7,19983  | -0,384224     | 0,654659      | 0,512687   | 0,757798   | no   |
| AN8554 | ChrV_A_nidulans_FGSC_A4:849541-850425 | WT_5hasex | WT_veg | NOTEST | 1,92158   | 3,23068  | 0,749541      | -0,745887     | 0,455735   |            | 1 no |
| AN8555 | ChrV_A_nidulans_FGSC_A4:851777-853041 | WT_5hasex | WT_veg | NOTEST | 1,64345   | 3,08231  | 0,907282      | -0,860046     | 0,389764   |            | 1 no |
| AN8556 | ChrV_A_nidulans_FGSC_A4:853382-855323 | WT_5hasex | WT_veg | NOTEST | 1,66748   | 1,45296  | -0,198673     | 0,196218      | 0,84444    |            | 1 no |

# Supplementary table 1

|        |                                           |           |        |        |           |          |               |               |            |            |     |
|--------|-------------------------------------------|-----------|--------|--------|-----------|----------|---------------|---------------|------------|------------|-----|
| AN8557 | ChrV_A_nidulans_FGSC_A4:856253-859575     | WT_5hasex | WT_veg | OK     | 55,6667   | 51,8753  | -0,101767     | 0,209881      | 0,833761   | 0,934001   | no  |
| AN8558 | ChrV_A_nidulans_FGSC_A4:860524-862363     | WT_5hasex | WT_veg | OK     | 2,1905    | 0,817111 | -1,42266      | 1,35793       | 0,174486   | 0,418233   | no  |
| AN8559 | ChrV_A_nidulans_FGSC_A4:863364-864621     | WT_5hasex | WT_veg | OK     | 27,6501   | 45,0769  | 0,705106      | -1,13297      | 0,257228   | 0,527081   | no  |
| AN8561 | ChrV_A_nidulans_FGSC_A4:871501-872595     | WT_5hasex | WT_veg | OK     | 7,6088    | 26,1765  | 1,78253       | -2,26901      | 0,0232674  | 0,0998657  | no  |
| AN8562 | ChrV_A_nidulans_FGSC_A4:872909-878440     | WT_5hasex | WT_veg | OK     | 8,01646   | 14,4721  | 0,85224       | -1,64603      | 0,0997567  | 0,288825   | no  |
| AN8566 | ChrV_A_nidulans_FGSC_A4:885761-886761     | WT_5hasex | WT_veg | OK     | 7,8701    | 23,945   | 1,60527       | -2,43993      | 0,01469    | 0,0703837  | no  |
| AN8567 | ChrV_A_nidulans_FGSC_A4:892535-894024     | WT_5hasex | WT_veg | OK     | 151,655   | 413,519  | 1,44716       | -2,96197      | 0,00305681 | 0,0198541  | yes |
| AN8568 | ChrV_A_nidulans_FGSC_A4:895428-896124     | WT_5hasex | WT_veg | OK     | 17,4613   | 25,0689  | 0,521737      | -0,80856      | 0,418768   | 0,687126   | no  |
| AN8569 | ChrV_A_nidulans_FGSC_A4:896223-896992     | WT_5hasex | WT_veg | OK     | 2,16894   | 1,93297  | -0,166168     | 0,132255      | 0,894783   | 0,959844   | no  |
| AN8570 | ChrV_A_nidulans_FGSC_A4:898587-899936     | WT_5hasex | WT_veg | NOTEST | 0,501689  | 0,821815 | 0,712019      | -0,417594     | 0,676244   | 1          | no  |
| AN8571 | ChrV_A_nidulans_FGSC_A4:902945-903656     | WT_5hasex | WT_veg | OK     | 116,852   | 161,868  | 0,470143      | -0,963931     | 0,335081   | 0,611234   | no  |
| AN8572 | ChrV_A_nidulans_FGSC_A4:904959-905997     | WT_5hasex | WT_veg | OK     | 19,0205   | 28,1698  | 0,566593      | -1,00383      | 0,315463   | 0,591656   | no  |
| AN8573 | ChrV_A_nidulans_FGSC_A4:906616-908354     | WT_5hasex | WT_veg | OK     | 6,49167   | 11,3575  | 0,806989      | -1,20565      | 0,227953   | 0,491047   | no  |
| AN8574 | ChrV_A_nidulans_FGSC_A4:908665-909800     | WT_5hasex | WT_veg | OK     | 7,19537   | 17,1102  | 1,24972       | -1,66308      | 0,0962955  | 0,281882   | no  |
| AN8575 | ChrV_A_nidulans_FGSC_A4:911937-914453     | WT_5hasex | WT_veg | OK     | 3,97782   | 11,9163  | 1,58289       | -2,35025      | 0,0187609  | 0,0847287  | no  |
| AN8576 | ChrV_A_nidulans_FGSC_A4:916129-922139     | WT_5hasex | WT_veg | OK     | 7,12169   | 13,1466  | 0,884396      | -1,72302      | 0,0848847  | 0,258477   | no  |
| AN8577 | ChrV_A_nidulans_FGSC_A4:926300-929692     | WT_5hasex | WT_veg | OK     | 3,73222   | 9,42181  | 1,33597       | -2,14739      | 0,0317625  | 0,126881   | no  |
| AN8578 | ChrV_A_nidulans_FGSC_A4:930040-930984     | WT_5hasex | WT_veg | NOTEST | 0,804659  | 2,01814  | 1,32657       | -1,05664      | 0,290675   | 1          | no  |
| AN8579 | ChrIII_A_nidulans_FGSC_A4:3467316-3469753 | WT_5hasex | WT_veg | NOTEST | 0         | 0        | 0             | 0             | 1          | 1          | no  |
| AN8580 | ChrIII_A_nidulans_FGSC_A4:3464580-3466104 | WT_5hasex | WT_veg | OK     | 51,8637   | 86,8802  | 0,744301      | -1,51727      | 0,129199   | 0,343862   | no  |
| AN8581 | ChrIII_A_nidulans_FGSC_A4:3459842-3461648 | WT_5hasex | WT_veg | NOTEST | 0,0987505 | 0        | -1.79769e+308 | -1.79769e+308 | 0,165569   | 1          | no  |
| AN8583 | ChrIII_A_nidulans_FGSC_A4:3453068-3454187 | WT_5hasex | WT_veg | NOTEST | 0         | 0        | 0             | 0             | 1          | 1          | no  |
| AN8584 | ChrIII_A_nidulans_FGSC_A4:3451894-3452328 | WT_5hasex | WT_veg | NOTEST | 0         | 0        | 0             | 0             | 1          | 1          | no  |
| AN8585 | ChrIII_A_nidulans_FGSC_A4:3446706-3447788 | WT_5hasex | WT_veg | NOTEST | 1,43264   | 1,00782  | -0,507429     | 0,373602      | 0,7087     | 1          | no  |
| AN8586 | ChrIII_A_nidulans_FGSC_A4:3443318-3444115 | WT_5hasex | WT_veg | NOTEST | 0         | 0        | 0             | 0             | 1          | 1          | no  |
| AN8587 | ChrIII_A_nidulans_FGSC_A4:3439386-3440589 | WT_5hasex | WT_veg | OK     | 16,072    | 3,69914  | -2,11929      | 2,88249       | 0,00394543 | 0,0245195  | yes |
| AN8589 | ChrIII_A_nidulans_FGSC_A4:3432947-3433981 | WT_5hasex | WT_veg | NOTEST | 0         | 0        | 0             | 0             | 1          | 1          | no  |
| AN8590 | ChrIII_A_nidulans_FGSC_A4:3426182-3430148 | WT_5hasex | WT_veg | OK     | 11,446    | 23,4184  | 1,03279       | -1,9316       | 0,0534083  | 0,185892   | no  |
| AN8591 | ChrIII_A_nidulans_FGSC_A4:3426182-3430148 | WT_5hasex | WT_veg | OK     | 162,979   | 610,577  | 1,90549       | -3,82933      | 0,00012849 | 0,00136658 | yes |
| AN8592 | ChrIII_A_nidulans_FGSC_A4:3423665-3425677 | WT_5hasex | WT_veg | OK     | 14,1212   | 29,8014  | 1,07751       | -1,97723      | 0,0480156  | 0,172692   | no  |
| AN8593 | ChrIII_A_nidulans_FGSC_A4:3421428-3422926 | WT_5hasex | WT_veg | OK     | 2,72472   | 2,23572  | -0,285372     | 0,298908      | 0,76501    | 0,903252   | no  |
| AN8595 | ChrIII_A_nidulans_FGSC_A4:3414868-3416751 | WT_5hasex | WT_veg | NOTEST | 1,3427    | 2,70825  | 1,01222       | -1,17739      | 0,239041   | 1          | no  |
| AN8596 | ChrIII_A_nidulans_FGSC_A4:3412701-3414591 | WT_5hasex | WT_veg | NOTEST | 0,574062  | 1,15985  | 1,01466       | -0,845293     | 0,397947   | 1          | no  |
| AN8597 | ChrIII_A_nidulans_FGSC_A4:3410877-3412204 | WT_5hasex | WT_veg | NOTEST | 1,79404   | 0,610138 | -1,556        | 1,02497       | 0,305378   | 1          | no  |
| AN8599 | ChrIII_A_nidulans_FGSC_A4:3404028-3405143 | WT_5hasex | WT_veg | OK     | 3,25191   | 2,69954  | -0,268574     | 0,300434      | 0,763846   | 0,902738   | no  |
| AN8601 | ChrIII_A_nidulans_FGSC_A4:3398447-3399398 | WT_5hasex | WT_veg | OK     | 7,53993   | 10,0754  | 0,418217      | -0,543153     | 0,587024   | 0,805458   | no  |
| AN8602 | ChrIII_A_nidulans_FGSC_A4:3395652-3397266 | WT_5hasex | WT_veg | OK     | 7,19261   | 9,13625  | 0,345087      | -0,519201     | 0,603621   | 0,815483   | no  |
| AN8603 | ChrIII_A_nidulans_FGSC_A4:3393583-3395265 | WT_5hasex | WT_veg | OK     | 7,81792   | 7,91004  | 0,0168993     | -0,0257233    | 0,979478   | 0,992873   | no  |
| AN8604 | ChrIII_A_nidulans_FGSC_A4:3391016-3391727 | WT_5hasex | WT_veg | OK     | 35,0025   | 89,6257  | 1,35645       | -2,48552      | 0,0129363  | 0,0638493  | no  |
| AN8607 | ChrIII_A_nidulans_FGSC_A4:3385064-3385685 | WT_5hasex | WT_veg | OK     | 0,493705  | 4,20105  | 3,08903       | -2,10714      | 0,0351051  | 0,136853   | no  |
| AN8608 | ChrIII_A_nidulans_FGSC_A4:3381106-3381815 | WT_5hasex | WT_veg | OK     | 16,4027   | 30,2802  | 0,884437      | -1,22119      | 0,222014   | 0,483541   | no  |
| AN8609 | ChrIII_A_nidulans_FGSC_A4:3380049-3381065 | WT_5hasex | WT_veg | OK     | 26,9635   | 28,8341  | 0,096768      | -0,156652     | 0,875519   | 0,952339   | no  |
| AN8610 | ChrIII_A_nidulans_FGSC_A4:3376593-3378230 | WT_5hasex | WT_veg | OK     | 7,45376   | 8,52559  | 0,19383       | -0,29611      | 0,767146   | 0,904306   | no  |
| AN8611 | ChrIII_A_nidulans_FGSC_A4:3373594-3374681 | WT_5hasex | WT_veg | OK     | 46,2964   | 147,875  | 1,67541       | -2,6848       | 0,00725721 | 0,0403023  | yes |
| AN8612 | ChrIII_A_nidulans_FGSC_A4:3370861-3372044 | WT_5hasex | WT_veg | OK     | 1,92503   | 6,27198  | 1,70404       | -1,99049      | 0,0465365  | 0,16882    | no  |
| AN8614 | ChrIII_A_nidulans_FGSC_A4:3364530-3365436 | WT_5hasex | WT_veg | NOTEST | 0         | 0        | 0             | 0             | 1          | 1          | no  |
| AN8616 | ChrIII_A_nidulans_FGSC_A4:3256177-3258476 | WT_5hasex | WT_veg | NOTEST | 0         | 0        | 0             | 0             | 1          | 1          | no  |
| AN8617 | ChrIII_A_nidulans_FGSC_A4:3354901-3355601 | WT_5hasex | WT_veg | NOTEST | 1,35037   | 1,69142  | 0,324885      | -0,19344      | 0,846615   | 1          | no  |
| AN8618 | ChrIII_A_nidulans_FGSC_A4:3352708-3353762 | WT_5hasex | WT_veg | OK     | 7,85552   | 0,630612 | -3,63888      | 2,45898       | 0,0139334  | 0,0675428  | no  |
| AN8619 | ChrIII_A_nidulans_FGSC_A4:3349626-3350708 | WT_5hasex | WT_veg | NOTEST | 1,8082    | 1,7332   | -0,0611175    | 0,0597296     | 0,952371   | 1          | no  |
| AN8620 | ChrIII_A_nidulans_FGSC_A4:3346069-3348127 | WT_5hasex | WT_veg | NOTEST | 0         | 0        | 0             | 0             | 1          | 1          | no  |
| AN8621 | ChrIII_A_nidulans_FGSC_A4:3342363-3345010 | WT_5hasex | WT_veg | OK     | 5,62032   | 122,55   | 4,44657       | -7,0458       | 1,8441E-12 | 9,901E-11  | yes |
| AN8622 | ChrIII_A_nidulans_FGSC_A4:3339771-3341989 | WT_5hasex | WT_veg | NOTEST | 1,05253   | 0,834635 | -0,33464      | 0,313393      | 0,753982   | 1          | no  |

## Supplementary table 1

|        |                                           |           |        |        |           |          |               |               |            |            |     |
|--------|-------------------------------------------|-----------|--------|--------|-----------|----------|---------------|---------------|------------|------------|-----|
| AN8623 | ChrIII_A_nidulans_FGSC_A4:3337190-3339142 | WT_5hasex | WT_veg | NOTEST | 0         | 0        | 0             | 0             | 1          | 1          | no  |
| AN8624 | ChrIII_A_nidulans_FGSC_A4:3335753-3336575 | WT_5hasex | WT_veg | OK     | 3,63376   | 0        | -1.79769e+308 | -1.79769e+308 | 0,0199808  | 0,0890866  | no  |
| AN8625 | ChrIII_A_nidulans_FGSC_A4:3333616-3334763 | WT_5hasex | WT_veg | NOTEST | 0,272213  | 0        | -1.79769e+308 | -1.79769e+308 | 0,224063   | 1          | no  |
| AN8626 | ChrIII_A_nidulans_FGSC_A4:3330539-3332740 | WT_5hasex | WT_veg | NOTEST | 0         | 0        | 0             | 0             | 1          | 1          | no  |
| AN8627 | ChrIII_A_nidulans_FGSC_A4:3327538-3328904 | WT_5hasex | WT_veg | OK     | 99,9668   | 277,567  | 1,47331       | -2,85507      | 0,00430269 | 0,0263461  | yes |
| AN8628 | ChrIII_A_nidulans_FGSC_A4:3326243-3327333 | WT_5hasex | WT_veg | OK     | 24,0713   | 47,1112  | 0,968757      | -1,64921      | 0,099105   | 0,287479   | no  |
| AN8629 | ChrIII_A_nidulans_FGSC_A4:3323689-3325420 | WT_5hasex | WT_veg | NOTEST | 1,08541   | 1,50578  | 0,472277      | -0,504088     | 0,614199   | 1          | no  |
| AN8630 | ChrIII_A_nidulans_FGSC_A4:3321939-3322520 | WT_5hasex | WT_veg | OK     | 44,5744   | 90,9374  | 1,02866       | -1,83935      | 0,0658643  | 0,215862   | no  |
| AN8632 | ChrIII_A_nidulans_FGSC_A4:3314553-3317833 | WT_5hasex | WT_veg | NOTEST | 0,0570822 | 0        | -1.79769e+308 | -1.79769e+308 | 0,165569   | 1          | no  |
| AN8633 | ChrIII_A_nidulans_FGSC_A4:3310838-3312678 | WT_5hasex | WT_veg | OK     | 13,1523   | 27,0386  | 1,03971       | -1,83828      | 0,0660218  | 0,216257   | no  |
| AN8634 | ChrIII_A_nidulans_FGSC_A4:3309134-3310228 | WT_5hasex | WT_veg | OK     | 15,4601   | 27,8833  | 0,850856      | -1,45677      | 0,14518    | 0,371243   | no  |
| AN8635 | ChrIII_A_nidulans_FGSC_A4:3305426-3306568 | WT_5hasex | WT_veg | OK     | 4,05641   | 14,3809  | 1,82588       | -2,22308      | 0,0262102  | 0,109431   | no  |
| AN8636 | ChrIII_A_nidulans_FGSC_A4:3302048-3304323 | WT_5hasex | WT_veg | OK     | 95,2335   | 602,095  | 2,66045       | -4,76796      | 1,861E-06  | 3,2184E-05 | yes |
| AN8639 | ChrIII_A_nidulans_FGSC_A4:3292551-3294114 | WT_5hasex | WT_veg | OK     | 64,3841   | 429,456  | 2,73773       | -5,67633      | 1,3762E-08 | 3,8646E-07 | yes |
| AN8640 | ChrIII_A_nidulans_FGSC_A4:3291433-3291935 | WT_5hasex | WT_veg | OK     | 80,9463   | 452,077  | 2,48153       | -4,70738      | 2,5092E-06 | 4,1928E-05 | yes |
| AN8641 | ChrIII_A_nidulans_FGSC_A4:3290648-3291265 | WT_5hasex | WT_veg | OK     | 1243,68   | 6642,67  | 2,41715       | -4,28354      | 1,8394E-05 | 0,00024851 | yes |
| AN8642 | ChrIII_A_nidulans_FGSC_A4:3288891-3290233 | WT_5hasex | WT_veg | OK     | 10,6541   | 11,7663  | 0,143248      | -0,224839     | 0,822104   | 0,928927   | no  |
| AN8643 | ChrIII_A_nidulans_FGSC_A4:3287480-3288765 | WT_5hasex | WT_veg | OK     | 17,0577   | 51,1922  | 1,5855        | -2,89027      | 0,00384908 | 0,0240376  | yes |
| AN8644 | ChrIII_A_nidulans_FGSC_A4:3282437-3283713 | WT_5hasex | WT_veg | OK     | 9,76626   | 11,8554  | 0,27967       | -0,436309     | 0,662613   | 0,848851   | no  |
| AN8645 | ChrIII_A_nidulans_FGSC_A4:3278406-3279795 | WT_5hasex | WT_veg | OK     | 4,05931   | 3,65783  | -0,150249     | 0,191945      | 0,847786   | 0,940086   | no  |
| AN8646 | ChrIII_A_nidulans_FGSC_A4:3271962-3273817 | WT_5hasex | WT_veg | OK     | 1,37085   | 6,89557  | 2,3306        | -2,21643      | 0,0266617  | 0,110778   | no  |
| AN8648 | ChrIII_A_nidulans_FGSC_A4:3261188-3266227 | WT_5hasex | WT_veg | OK     | 2,53764   | 12,1556  | 2,26006       | -3,77103      | 0,00016258 | 0,00166819 | yes |
| AN8649 | ChrIII_A_nidulans_FGSC_A4:3259649-3260312 | WT_5hasex | WT_veg | OK     | 12,7373   | 16,9731  | 0,414187      | -0,622132     | 0,533855   | 0,772203   | no  |
| AN8650 | ChrIII_A_nidulans_FGSC_A4:3256177-3258476 | WT_5hasex | WT_veg | NOTEST | 0,139621  | 0,683935 | 2,29234       | -1,01781      | 0,308766   | 1          | no  |
| AN8652 | ChrIII_A_nidulans_FGSC_A4:3250267-3251726 | WT_5hasex | WT_veg | OK     | 5,5067    | 8,80402  | 0,676975      | -0,935738     | 0,349408   | 0,625096   | no  |
| AN8653 | ChrIII_A_nidulans_FGSC_A4:3246634-3248759 | WT_5hasex | WT_veg | OK     | 51,0075   | 69,4422  | 0,445103      | -0,697097     | 0,485742   | 0,739593   | no  |
| AN8654 | ChrIII_A_nidulans_FGSC_A4:3243524-3246125 | WT_5hasex | WT_veg | OK     | 2,19401   | 6,24553  | 1,50926       | -1,99078      | 0,0465047  | 0,168751   | no  |
| AN8655 | ChrIII_A_nidulans_FGSC_A4:3239297-3242062 | WT_5hasex | WT_veg | OK     | 1,73561   | 7,03819  | 2,01976       | -2,57165      | 0,0101216  | 0,0526157  | no  |
| AN8656 | ChrIII_A_nidulans_FGSC_A4:3237392-3238794 | WT_5hasex | WT_veg | NOTEST | 0,673851  | 1,71986  | 1,35179       | -1,2729       | 0,203055   | 1          | no  |
| AN8657 | ChrIII_A_nidulans_FGSC_A4:3234786-3236238 | WT_5hasex | WT_veg | OK     | 2,7656    | 6,5611   | 1,24634       | -1,61894      | 0,10546    | 0,300588   | no  |
| AN8658 | ChrIII_A_nidulans_FGSC_A4:3231632-3233357 | WT_5hasex | WT_veg | NOTEST | 0,173574  | 0,134184 | -0,371337     | 0,106878      | 0,914886   | 1          | no  |
| AN8659 | ChrIII_A_nidulans_FGSC_A4:3229830-3231157 | WT_5hasex | WT_veg | NOTEST | 1,4888    | 0        | -1.79769e+308 | -1.79769e+308 | 0,042755   | 1          | no  |
| AN8660 | ChrIII_A_nidulans_FGSC_A4:3225084-3227083 | WT_5hasex | WT_veg | OK     | 20,9645   | 66,2346  | 1,65964       | -3,03234      | 0,00242663 | 0,0164014  | yes |
| AN8661 | ChrIII_A_nidulans_FGSC_A4:3221381-3223019 | WT_5hasex | WT_veg | OK     | 72,774    | 202,381  | 1,47558       | -2,48386      | 0,0129968  | 0,0640611  | no  |
| AN8662 | ChrIII_A_nidulans_FGSC_A4:3218280-3219608 | WT_5hasex | WT_veg | OK     | 8,91726   | 2,33233  | -1,93483      | 2,23579       | 0,0253658  | 0,106602   | no  |
| AN8664 | ChrIII_A_nidulans_FGSC_A4:3212148-3213335 | WT_5hasex | WT_veg | OK     | 417,377   | 1113,74  | 1,41598       | -2,60267      | 0,00924998 | 0,0489663  | yes |
| AN8665 | ChrIII_A_nidulans_FGSC_A4:3207533-3209049 | WT_5hasex | WT_veg | NOTEST | 0,881618  | 1,81819  | 1,04427       | -0,703764     | 0,481579   | 1          | no  |
| AN8666 | ChrIII_A_nidulans_FGSC_A4:3203073-3204304 | WT_5hasex | WT_veg | OK     | 4,76982   | 3,26726  | -0,545854     | 0,676932      | 0,498449   | 0,748603   | no  |
| AN8668 | ChrIII_A_nidulans_FGSC_A4:3189624-3190970 | WT_5hasex | WT_veg | OK     | 32,1268   | 132,939  | 2,04891       | -3,99631      | 6,4337E-05 | 0,00074754 | yes |
| AN8670 | ChrIII_A_nidulans_FGSC_A4:3174527-3177262 | WT_5hasex | WT_veg | OK     | 8,31725   | 15,1232  | 0,862586      | -1,48219      | 0,138289   | 0,359642   | no  |
| AN8671 | ChrIII_A_nidulans_FGSC_A4:3164655-3172081 | WT_5hasex | WT_veg | OK     | 4,10211   | 8,54606  | 1,05889       | -1,99096      | 0,0464853  | 0,168705   | no  |
| AN8672 | ChrIII_A_nidulans_FGSC_A4:3158895-3163572 | WT_5hasex | WT_veg | OK     | 18,9723   | 40,9728  | 1,11077       | -2,32231      | 0,0202163  | 0,0898843  | no  |
| AN8673 | ChrIII_A_nidulans_FGSC_A4:3153552-3155475 | WT_5hasex | WT_veg | OK     | 9,00797   | 22,0103  | 1,28891       | -2,17754      | 0,02944    | 0,119572   | no  |
| AN8674 | ChrIII_A_nidulans_FGSC_A4:3151889-3152711 | WT_5hasex | WT_veg | OK     | 129,633   | 208,264  | 0,683977      | -1,41044      | 0,158409   | 0,393077   | no  |
| AN8675 | ChrIII_A_nidulans_FGSC_A4:3149332-3151360 | WT_5hasex | WT_veg | OK     | 28,6532   | 41,9638  | 0,550448      | -1,10865      | 0,26758    | 0,539339   | no  |
| AN8677 | ChrIII_A_nidulans_FGSC_A4:3143543-3145142 | WT_5hasex | WT_veg | OK     | 110,56    | 121,347  | 0,134315      | -0,274919     | 0,783379   | 0,91168    | no  |
| AN8678 | ChrIII_A_nidulans_FGSC_A4:3140309-3140760 | WT_5hasex | WT_veg | OK     | 1,35718   | 13,6132  | 3,32633       | -2,57205      | 0,0101099  | 0,0525732  | no  |
| AN8679 | ChrIII_A_nidulans_FGSC_A4:3138377-3139618 | WT_5hasex | WT_veg | OK     | 67,6549   | 237,77   | 1,8133        | -3,63462      | 0,00027839 | 0,00264662 | yes |
| AN8681 | ChrIII_A_nidulans_FGSC_A4:3134002-3135895 | WT_5hasex | WT_veg | OK     | 26,1609   | 32,9578  | 0,33321       | -0,671935     | 0,501625   | 0,750836   | no  |
| AN8682 | ChrIII_A_nidulans_FGSC_A4:3132554-3133796 | WT_5hasex | WT_veg | OK     | 14,9127   | 46,2105  | 1,63167       | -2,86779      | 0,00413354 | 0,02548    | yes |
| AN8683 | ChrIII_A_nidulans_FGSC_A4:3127678-3130084 | WT_5hasex | WT_veg | OK     | 51,672    | 75,8978  | 0,554674      | -0,971002     | 0,331547   | 0,607962   | no  |
| AN8684 | ChrIII_A_nidulans_FGSC_A4:3126334-3127426 | WT_5hasex | WT_veg | OK     | 13,6082   | 4,49978  | -1,59697      | 2,28307       | 0,0224262  | 0,0970891  | no  |
| AN8685 | ChrIII_A_nidulans_FGSC_A4:3124147-3125138 | WT_5hasex | WT_veg | OK     | 14,248    | 23,221   | 0,704672      | -1,17346      | 0,240612   | 0,50651    | no  |

## Supplementary table 1

|        |                                           |           |        |        |          |          |              |              |            |            |     |
|--------|-------------------------------------------|-----------|--------|--------|----------|----------|--------------|--------------|------------|------------|-----|
| AN8687 | ChrIII_A_nidulans_FGSC_A4:3121983-3123555 | WT_5hasex | WT_veg | OK     | 27,6225  | 40,6451  | 0,557237     | -1,10731     | 0,268161   | 0,53995    | no  |
| AN8688 | ChrIII_A_nidulans_FGSC_A4:3120620-3121202 | WT_5hasex | WT_veg | OK     | 8,13882  | 26,0951  | 1,68089      | -2,09324     | 0,0363282  | 0,140531   | no  |
| AN8690 | ChrIII_A_nidulans_FGSC_A4:3116168-3117028 | WT_5hasex | WT_veg | OK     | 171,15   | 423,152  | 1,30591      | -2,7049      | 0,00683259 | 0,0383917  | yes |
| AN8691 | ChrIII_A_nidulans_FGSC_A4:3113089-3116051 | WT_5hasex | WT_veg | OK     | 6,67442  | 20,3485  | 1,60821      | -2,85113     | 0,00435646 | 0,0266224  | yes |
| AN8694 | ChrIII_A_nidulans_FGSC_A4:3100916-3102951 | WT_5hasex | WT_veg | OK     | 38,1171  | 61,1379  | 0,681627     | -1,37476     | 0,169206   | 0,409436   | no  |
| AN8695 | ChrIII_A_nidulans_FGSC_A4:3088523-3091219 | WT_5hasex | WT_veg | OK     | 17,3699  | 41,8642  | 1,26913      | -2,32071     | 0,0203023  | 0,0901883  | no  |
| AN8696 | ChrIII_A_nidulans_FGSC_A4:3086769-3087874 | WT_5hasex | WT_veg | OK     | 10,2327  | 23,7     | 1,21169      | -1,92265     | 0,0545235  | 0,18869    | no  |
| AN8697 | ChrIII_A_nidulans_FGSC_A4:3084224-3086304 | WT_5hasex | WT_veg | NOTEST | 0,127031 | 0,434132 | 1,77296      | -0,779893    | 0,435454   | 1          | no  |
| AN8698 | ChrIII_A_nidulans_FGSC_A4:3082272-3083367 | WT_5hasex | WT_veg | OK     | 156,914  | 152,28   | -0,0432417   | 0,0891712    | 0,928946   | 0,973125   | no  |
| AN8701 | ChrIII_A_nidulans_FGSC_A4:3069528-3073917 | WT_5hasex | WT_veg | OK     | 6,66826  | 6,5877   | -0,0175366   | 0,0326949    | 0,973918   | 0,990798   | no  |
| AN8702 | ChrIII_A_nidulans_FGSC_A4:3067883-3068997 | WT_5hasex | WT_veg | OK     | 164,826  | 334,359  | 1,02045      | -2,06394     | 0,0390234  | 0,148138   | no  |
| AN8703 | ChrIII_A_nidulans_FGSC_A4:3066194-3067478 | WT_5hasex | WT_veg | NOTEST | 0,554717 | 1,64363  | 1,56706      | -1,25738     | 0,208615   | 1          | no  |
| AN8704 | ChrIII_A_nidulans_FGSC_A4:3064716-3065662 | WT_5hasex | WT_veg | OK     | 1079,8   | 1395,68  | 0,370212     | -0,683052    | 0,494574   | 0,74576    | no  |
| AN8705 | ChrIII_A_nidulans_FGSC_A4:3062968-3063945 | WT_5hasex | WT_veg | OK     | 3856,42  | 8018,45  | 1,05606      | -1,50283     | 0,132883   | 0,350447   | no  |
| AN8707 | ChrIII_A_nidulans_FGSC_A4:3059236-3061362 | WT_5hasex | WT_veg | OK     | 127,66   | 272,377  | 1,0933       | -2,22099     | 0,0263519  | 0,109847   | no  |
| AN8708 | ChrIII_A_nidulans_FGSC_A4:3057293-3058285 | WT_5hasex | WT_veg | OK     | 2,34773  | 9,93561  | 2,08134      | -2,21039     | 0,027078   | 0,112047   | no  |
| AN8709 | ChrIII_A_nidulans_FGSC_A4:3055252-3056952 | WT_5hasex | WT_veg | OK     | 42,4169  | 83,617   | 0,979155     | -1,92669     | 0,0540187  | 0,187423   | no  |
| AN8710 | ChrIII_A_nidulans_FGSC_A4:3053330-3054842 | WT_5hasex | WT_veg | OK     | 34,9909  | 63,0851  | 0,850321     | -1,69825     | 0,0894615  | 0,26804    | no  |
| AN8711 | ChrIII_A_nidulans_FGSC_A4:3052229-3053130 | WT_5hasex | WT_veg | OK     | 26,7567  | 59,0946  | 1,14313      | -2,0909      | 0,0365375  | 0,141052   | no  |
| AN8712 | ChrIII_A_nidulans_FGSC_A4:3050787-3052034 | WT_5hasex | WT_veg | OK     | 1001,17  | 1639,89  | 0,711912     | -1,21924     | 0,222752   | 0,484588   | no  |
| AN8713 | ChrIII_A_nidulans_FGSC_A4:3047459-3050758 | WT_5hasex | WT_veg | OK     | 30,1226  | 102,29   | 1,76374      | -3,66696     | 0,00024545 | 0,00237658 | yes |
| AN8714 | ChrIII_A_nidulans_FGSC_A4:3046834-3047230 | WT_5hasex | WT_veg | OK     | 390,399  | 2486,64  | 2,67117      | -5,52424     | 3,3092E-08 | 8,5548E-07 | yes |
| AN8716 | ChrIII_A_nidulans_FGSC_A4:3039882-3041130 | WT_5hasex | WT_veg | OK     | 14,2559  | 23,1668  | 0,700495     | -1,19103     | 0,233642   | 0,498706   | no  |
| AN8717 | ChrIII_A_nidulans_FGSC_A4:3034224-3035799 | WT_5hasex | WT_veg | OK     | 37,3124  | 72,6644  | 0,961592     | -1,93362     | 0,0531598  | 0,18528    | no  |
| AN8718 | ChrIII_A_nidulans_FGSC_A4:3028358-3031194 | WT_5hasex | WT_veg | OK     | 76,4191  | 253,591  | 1,7305       | -3,50113     | 0,0004633  | 0,00408165 | yes |
| AN8719 | ChrIII_A_nidulans_FGSC_A4:3027149-3027590 | WT_5hasex | WT_veg | OK     | 27,0283  | 49,9201  | 0,885148     | -1,42684     | 0,153625   | 0,385084   | no  |
| AN8720 | ChrIII_A_nidulans_FGSC_A4:3026055-3027077 | WT_5hasex | WT_veg | OK     | 129,72   | 442,366  | 1,76984      | -3,50569     | 0,00045543 | 0,00402245 | yes |
| AN8721 | ChrIII_A_nidulans_FGSC_A4:3023756-3025739 | WT_5hasex | WT_veg | OK     | 10,3411  | 15,2722  | 0,562512     | -0,977454    | 0,328344   | 0,604649   | no  |
| AN8722 | ChrIII_A_nidulans_FGSC_A4:3020761-3023157 | WT_5hasex | WT_veg | OK     | 164,638  | 330,848  | 1,00687      | -2,02994     | 0,0423626  | 0,157316   | no  |
| AN8723 | ChrIII_A_nidulans_FGSC_A4:3017667-3018936 | WT_5hasex | WT_veg | OK     | 11,4965  | 17,2879  | 0,588569     | -0,957459    | 0,338336   | 0,614284   | no  |
| AN8724 | ChrIII_A_nidulans_FGSC_A4:3015851-3016694 | WT_5hasex | WT_veg | OK     | 13,5788  | 29,1212  | 1,10072      | -1,80532     | 0,071025   | 0,227817   | no  |
| AN8725 | ChrIII_A_nidulans_FGSC_A4:3014579-3015114 | WT_5hasex | WT_veg | NOTEST | 0        | 0,644338 | 1.79769e+308 | 1.79769e+308 | 0,309884   | 1          | no  |
| AN8726 | ChrIII_A_nidulans_FGSC_A4:3010913-3012676 | WT_5hasex | WT_veg | OK     | 16,6356  | 34,6692  | 1,05938      | -1,85855     | 0,0630916  | 0,209301   | no  |
| AN8727 | ChrIII_A_nidulans_FGSC_A4:3008700-3010248 | WT_5hasex | WT_veg | OK     | 49,5962  | 93,9021  | 0,920927     | -1,77032     | 0,0766738  | 0,240576   | no  |
| AN8728 | ChrIII_A_nidulans_FGSC_A4:3006609-3007477 | WT_5hasex | WT_veg | NOTEST | 1,76101  | 2,10527  | 0,257601     | -0,230496    | 0,817706   | 1          | no  |
| AN8729 | ChrIII_A_nidulans_FGSC_A4:3004351-3005092 | WT_5hasex | WT_veg | NOTEST | 0        | 0        | 0            | 0            | 1          | 1          | no  |
| AN8730 | ChrIII_A_nidulans_FGSC_A4:3002423-3003536 | WT_5hasex | WT_veg | OK     | 4,4547   | 6,82382  | 0,61525      | -0,824459    | 0,409679   | 0,679684   | no  |
| AN8732 | ChrIII_A_nidulans_FGSC_A4:2995200-2996875 | WT_5hasex | WT_veg | NOTEST | 0,5507   | 0,952314 | 0,790171     | -0,614908    | 0,538615   | 1          | no  |
| AN8733 | ChrIII_A_nidulans_FGSC_A4:2993414-2994535 | WT_5hasex | WT_veg | OK     | 1,43304  | 35,0303  | 4,61146      | -5,69059     | 1,266E-08  | 3,584E-07  | yes |
| AN8734 | ChrIII_A_nidulans_FGSC_A4:2992447-2992911 | WT_5hasex | WT_veg | NOTEST | 0        | 0        | 0            | 0            | 1          | 1          | no  |
| AN8735 | ChrIII_A_nidulans_FGSC_A4:2990349-2991886 | WT_5hasex | WT_veg | NOTEST | 1,63812  | 1,20416  | -0,444012    | 0,395214     | 0,692685   | 1          | no  |
| AN8736 | ChrIII_A_nidulans_FGSC_A4:2988016-2988619 | WT_5hasex | WT_veg | NOTEST | 0        | 0        | 0            | 0            | 1          | 1          | no  |
| AN8738 | ChrIII_A_nidulans_FGSC_A4:2970441-2971886 | WT_5hasex | WT_veg | OK     | 6,28414  | 3,39671  | -0,887577    | 0,957908     | 0,338109   | 0,614088   | no  |
| AN8739 | ChrIII_A_nidulans_FGSC_A4:2968064-2969112 | WT_5hasex | WT_veg | OK     | 30,1912  | 11,8161  | -1,35337     | 2,38885      | 0,0169014  | 0,07844    | no  |
| AN8740 | ChrIII_A_nidulans_FGSC_A4:2959806-2960290 | WT_5hasex | WT_veg | OK     | 2,52375  | 2,25521  | -0,162304    | 0,106393     | 0,91527    | 0,9676     | no  |
| AN8741 | ChrIII_A_nidulans_FGSC_A4:2957664-2958685 | WT_5hasex | WT_veg | OK     | 10,7283  | 45,1803  | 2,07428      | -3,34485     | 0,00082328 | 0,00665454 | yes |
| AN8742 | ChrIII_A_nidulans_FGSC_A4:2952850-2956968 | WT_5hasex | WT_veg | OK     | 19,8645  | 29,517   | 0,571356     | -1,17597     | 0,239608   | 0,505471   | no  |
| AN8743 | ChrIII_A_nidulans_FGSC_A4:2948047-2951759 | WT_5hasex | WT_veg | OK     | 22,052   | 55,4404  | 1,33002      | -2,66514     | 0,00769574 | 0,0422584  | yes |
| AN8744 | ChrIII_A_nidulans_FGSC_A4:2946194-2947605 | WT_5hasex | WT_veg | OK     | 65,1311  | 56,8787  | -0,195457    | 0,397856     | 0,690736   | 0,864072   | no  |
| AN8746 | ChrIII_A_nidulans_FGSC_A4:2936232-2937530 | WT_5hasex | WT_veg | OK     | 255,543  | 485,493  | 0,925881     | -1,7935      | 0,0728933  | 0,231893   | no  |
| AN8748 | ChrIII_A_nidulans_FGSC_A4:2933353-2935494 | WT_5hasex | WT_veg | OK     | 63,7294  | 82,0884  | 0,36522      | -0,711267    | 0,476919   | 0,732824   | no  |
| AN8749 | ChrIII_A_nidulans_FGSC_A4:2931747-2933185 | WT_5hasex | WT_veg | OK     | 7,38767  | 20,7322  | 1,48868      | -2,34271     | 0,0191442  | 0,0860806  | no  |
| AN8750 | ChrIII_A_nidulans_FGSC_A4:2930469-2931066 | WT_5hasex | WT_veg | OK     | 341,09   | 858,842  | 1,33224      | -2,67877     | 0,00738922 | 0,0408837  | yes |

# Supplementary table 1

|        |                                           |           |        |        |          |          |               |               |            |            |     |
|--------|-------------------------------------------|-----------|--------|--------|----------|----------|---------------|---------------|------------|------------|-----|
| AN8752 | ChrIII_A_nidulans_FGSC_A4:2926118-2926795 | WT_5hasex | WT_veg | OK     | 30,9618  | 105,263  | 1,76543       | -2,78555      | 0,00534371 | 0,0313539  | yes |
| AN8753 | ChrIII_A_nidulans_FGSC_A4:2921832-2924410 | WT_5hasex | WT_veg | OK     | 31,6001  | 38,8891  | 0,299438      | -0,526659     | 0,59843    | 0,812261   | no  |
| AN8754 | ChrIII_A_nidulans_FGSC_A4:2916535-2919503 | WT_5hasex | WT_veg | OK     | 120,331  | 47,3509  | -1,34554      | 2,50104       | 0,012383   | 0,0616704  | no  |
| AN8756 | ChrIII_A_nidulans_FGSC_A4:2908527-2910821 | WT_5hasex | WT_veg | OK     | 16,7102  | 35,2992  | 1,07891       | -2,00602      | 0,0448544  | 0,164207   | no  |
| AN8757 | ChrIII_A_nidulans_FGSC_A4:2903928-2906143 | WT_5hasex | WT_veg | OK     | 1,42924  | 4,04272  | 1,50007       | -1,87387      | 0,0609487  | 0,204484   | no  |
| AN8759 | ChrIII_A_nidulans_FGSC_A4:2899495-2900563 | WT_5hasex | WT_veg | NOTEST | 0        | 0,999734 | 1.79769e+308  | 1.79769e+308  | 0,123323   | 1          | no  |
| AN8760 | ChrIII_A_nidulans_FGSC_A4:2896631-2898513 | WT_5hasex | WT_veg | NOTEST | 0,279186 | 0,62323  | 1,15854       | -0,745409     | 0,456025   | 1          | no  |
| AN8762 | ChrIII_A_nidulans_FGSC_A4:2893219-2894055 | WT_5hasex | WT_veg | OK     | 162,424  | 201,967  | 0,314357      | -0,649644     | 0,515922   | 0,760275   | no  |
| AN8763 | ChrIII_A_nidulans_FGSC_A4:2892455-2892923 | WT_5hasex | WT_veg | OK     | 117,269  | 150,898  | 0,363749      | -0,667783     | 0,504272   | 0,752518   | no  |
| AN8764 | ChrIII_A_nidulans_FGSC_A4:2891047-2892365 | WT_5hasex | WT_veg | OK     | 46,1137  | 63,0442  | 0,451168      | -0,843007     | 0,399225   | 0,671595   | no  |
| AN8765 | ChrIII_A_nidulans_FGSC_A4:2887690-2890499 | WT_5hasex | WT_veg | OK     | 16,7967  | 36,5456  | 1,12152       | -2,25094      | 0,0243896  | 0,10342    | no  |
| AN8766 | ChrIII_A_nidulans_FGSC_A4:2884861-2885650 | WT_5hasex | WT_veg | OK     | 85,1598  | 155,037  | 0,864371      | -1,73522      | 0,0827011  | 0,253729   | no  |
| AN8767 | ChrIII_A_nidulans_FGSC_A4:2882061-2884629 | WT_5hasex | WT_veg | OK     | 22,8314  | 16,6114  | -0,458846     | 0,843574      | 0,398907   | 0,671341   | no  |
| AN8768 | ChrIII_A_nidulans_FGSC_A4:2879442-2881082 | WT_5hasex | WT_veg | OK     | 20,2295  | 30,5716  | 0,595727      | -1,089        | 0,276153   | 0,549246   | no  |
| AN8770 | ChrIII_A_nidulans_FGSC_A4:2873118-2876168 | WT_5hasex | WT_veg | OK     | 73,0461  | 222,958  | 1,60989       | -3,24335      | 0,00118135 | 0,00901352 | yes |
| AN8772 | ChrIII_A_nidulans_FGSC_A4:2858385-2859557 | WT_5hasex | WT_veg | OK     | 23,7502  | 100,915  | 2,08713       | -3,73347      | 0,00018886 | 0,00189732 | yes |
| AN8774 | ChrIII_A_nidulans_FGSC_A4:2849632-2851295 | WT_5hasex | WT_veg | OK     | 9,16079  | 56,6332  | 2,6281        | -4,30934      | 1,6374E-05 | 0,0002245  | yes |
| AN8775 | ChrIII_A_nidulans_FGSC_A4:2845899-2847509 | WT_5hasex | WT_veg | NOTEST | 0,136725 | 0,637464 | 2,22106       | -1,14626      | 0,251686   | 1          | no  |
| AN8776 | ChrIII_A_nidulans_FGSC_A4:2843425-2844904 | WT_5hasex | WT_veg | OK     | 2,67968  | 2,7295   | 0,0265755     | -0,0323351    | 0,974205   | 0,990912   | no  |
| AN8778 | ChrIII_A_nidulans_FGSC_A4:2835491-2837392 | WT_5hasex | WT_veg | OK     | 3,72597  | 8,7282   | 1,22807       | -1,79039      | 0,0733918  | 0,233022   | no  |
| AN8779 | ChrIII_A_nidulans_FGSC_A4:2828679-2833021 | WT_5hasex | WT_veg | OK     | 0,189746 | 6,34872  | 5,06433       | -6,06525      | 1,3175E-09 | 4,5301E-08 | yes |
| AN8780 | ChrIII_A_nidulans_FGSC_A4:2825329-2826885 | WT_5hasex | WT_veg | OK     | 18,4281  | 19,3179  | 0,0680359     | -0,124209     | 0,901149   | 0,96199    | no  |
| AN8781 | ChrIII_A_nidulans_FGSC_A4:2822837-2823771 | WT_5hasex | WT_veg | OK     | 917,638  | 5322,37  | 2,53607       | -3,31169      | 0,00092734 | 0,00737867 | yes |
| AN8782 | ChrIII_A_nidulans_FGSC_A4:2819698-2820945 | WT_5hasex | WT_veg | OK     | 86,1809  | 144,114  | 0,741768      | -1,40917      | 0,158785   | 0,393691   | no  |
| AN8784 | ChrIII_A_nidulans_FGSC_A4:2812178-2812940 | WT_5hasex | WT_veg | OK     | 22,4575  | 23,1732  | 0,0452599     | -0,0757381    | 0,939627   | 0,977262   | no  |
| AN8785 | ChrIII_A_nidulans_FGSC_A4:2809000-2811384 | WT_5hasex | WT_veg | OK     | 42,3268  | 148,501  | 1,81083       | -3,78303      | 0,00015493 | 0,00159848 | yes |
| AN8786 | ChrIII_A_nidulans_FGSC_A4:2806644-2808430 | WT_5hasex | WT_veg | OK     | 10,8064  | 34,7098  | 1,68345       | -2,81795      | 0,00483312 | 0,0289446  | yes |
| AN8787 | ChrIII_A_nidulans_FGSC_A4:2802223-2805732 | WT_5hasex | WT_veg | OK     | 23,9819  | 61,0945  | 1,3491        | -2,8106       | 0,00494492 | 0,0294993  | yes |
| AN8788 | ChrIII_A_nidulans_FGSC_A4:2798147-2801460 | WT_5hasex | WT_veg | OK     | 9,05     | 16,4605  | 0,863015      | -1,45032      | 0,14697    | 0,374277   | no  |
| AN8789 | ChrIII_A_nidulans_FGSC_A4:2798147-2801460 | WT_5hasex | WT_veg | OK     | 3,08525  | 3,9113   | 0,342261      | -0,443153     | 0,657655   | 0,845678   | no  |
| AN8790 | ChrIII_A_nidulans_FGSC_A4:2795838-2797854 | WT_5hasex | WT_veg | OK     | 31,0778  | 70,3538  | 1,17874       | -2,392        | 0,0167569  | 0,0779225  | no  |
| AN8791 | ChrIII_A_nidulans_FGSC_A4:2793465-2794997 | WT_5hasex | WT_veg | OK     | 100,777  | 226,271  | 1,16688       | -2,42902      | 0,0151397  | 0,0720113  | no  |
| AN8792 | ChrIII_A_nidulans_FGSC_A4:2791902-2792462 | WT_5hasex | WT_veg | OK     | 9,03558  | 13,1758  | 0,544205      | -0,724852     | 0,468543   | 0,726872   | no  |
| AN8794 | ChrIII_A_nidulans_FGSC_A4:2785064-2785975 | WT_5hasex | WT_veg | OK     | 50,3434  | 149,244  | 1,5678        | -3,05493      | 0,0022511  | 0,0154179  | yes |
| AN8795 | ChrIII_A_nidulans_FGSC_A4:2782085-2784241 | WT_5hasex | WT_veg | OK     | 65,1017  | 92,9584  | 0,513891      | -1,06612      | 0,286371   | 0,560672   | no  |
| AN8796 | ChrIII_A_nidulans_FGSC_A4:2780113-2781354 | WT_5hasex | WT_veg | OK     | 65,9312  | 79,5446  | 0,270803      | -0,55891      | 0,576223   | 0,798745   | no  |
| AN8797 | ChrIII_A_nidulans_FGSC_A4:2777551-2779472 | WT_5hasex | WT_veg | OK     | 81,9433  | 61,1318  | -0,422702     | 0,872365      | 0,383009   | 0,656793   | no  |
| AN8798 | ChrIII_A_nidulans_FGSC_A4:2772356-2775066 | WT_5hasex | WT_veg | OK     | 19,9729  | 21,0042  | 0,0726351     | -0,146012     | 0,883912   | 0,955952   | no  |
| AN8799 | ChrIII_A_nidulans_FGSC_A4:2770452-2772054 | WT_5hasex | WT_veg | OK     | 8,08099  | 38,895   | 2,26698       | -3,70739      | 0,00020941 | 0,00207334 | yes |
| AN8801 | ChrIII_A_nidulans_FGSC_A4:2765802-2767188 | WT_5hasex | WT_veg | OK     | 54,5579  | 40,9502  | -0,413917     | 0,846705      | 0,39716    | 0,670192   | no  |
| AN8802 | ChrIII_A_nidulans_FGSC_A4:2763522-2764796 | WT_5hasex | WT_veg | OK     | 7,38481  | 0        | -1.79769e+308 | -1.79769e+308 | 0,0057383  | 0,0332962  | yes |
| AN8804 | ChrIII_A_nidulans_FGSC_A4:2758048-2758894 | WT_5hasex | WT_veg | OK     | 33,2663  | 105,938  | 1,67109       | -3,15288      | 0,00161668 | 0,0116972  | yes |
| AN8805 | ChrIII_A_nidulans_FGSC_A4:2756174-2756919 | WT_5hasex | WT_veg | OK     | 38,0047  | 181,686  | 2,2572        | -4,1256       | 3,6978E-05 | 0,0004606  | yes |
| AN8806 | ChrIII_A_nidulans_FGSC_A4:2754171-2756018 | WT_5hasex | WT_veg | OK     | 35,2004  | 59,0098  | 0,745363      | -1,47487      | 0,140248   | 0,362875   | no  |
| AN8807 | ChrIII_A_nidulans_FGSC_A4:2752105-2753730 | WT_5hasex | WT_veg | OK     | 23,1898  | 54,4278  | 1,23086       | -2,39712      | 0,0165246  | 0,0770654  | no  |
| AN8808 | ChrIII_A_nidulans_FGSC_A4:2750593-2751824 | WT_5hasex | WT_veg | OK     | 23,1229  | 43,0484  | 0,896637      | -1,62679      | 0,103781   | 0,297388   | no  |
| AN8809 | ChrIII_A_nidulans_FGSC_A4:2747121-2750173 | WT_5hasex | WT_veg | OK     | 19,5322  | 33,0385  | 0,75829       | -1,51664      | 0,129357   | 0,344131   | no  |
| AN8810 | ChrIII_A_nidulans_FGSC_A4:2743442-2745413 | WT_5hasex | WT_veg | OK     | 70,4029  | 59,1199  | -0,251992     | 0,504522      | 0,613895   | 0,821358   | no  |
| AN8811 | ChrIII_A_nidulans_FGSC_A4:2741974-2743208 | WT_5hasex | WT_veg | OK     | 86,6518  | 190,042  | 1,13301       | -2,31323      | 0,0207098  | 0,0915732  | no  |
| AN8812 | ChrIII_A_nidulans_FGSC_A4:2734962-2740767 | WT_5hasex | WT_veg | OK     | 5,70783  | 18,8554  | 1,72396       | -3,10213      | 0,00192134 | 0,0134926  | yes |
| AN8813 | ChrIII_A_nidulans_FGSC_A4:2726827-2731363 | WT_5hasex | WT_veg | OK     | 8,98511  | 20,4885  | 1,18921       | -2,25742      | 0,0239819  | 0,102179   | no  |
| AN8814 | ChrIII_A_nidulans_FGSC_A4:2723472-2725952 | WT_5hasex | WT_veg | OK     | 2,1311   | 3,7873   | 0,829568      | -0,967474     | 0,333307   | 0,609739   | no  |
| AN8815 | ChrIII_A_nidulans_FGSC_A4:2719284-2720992 | WT_5hasex | WT_veg | OK     | 1460,08  | 3194,74  | 1,12965       | -1,68831      | 0,0913509  | 0,271601   | no  |



## Supplementary table 1

|        |                                           |           |        |    |          |         |           |            |            |            |     |
|--------|-------------------------------------------|-----------|--------|----|----------|---------|-----------|------------|------------|------------|-----|
| AN8816 | ChrIII_A_nidulans_FGSC_A4:2717198-2719238 | WT_5hasex | WT_veg | OK | 11,5045  | 17,7514 | 0,62573   | -1,01111   | 0,311962   | 0,588302   | no  |
| AN8817 | ChrIII_A_nidulans_FGSC_A4:2711253-2712833 | WT_5hasex | WT_veg | OK | 46,0778  | 88,9728 | 0,949291  | -1,89938   | 0,0575144  | 0,195978   | no  |
| AN8818 | ChrIII_A_nidulans_FGSC_A4:2710283-2710894 | WT_5hasex | WT_veg | OK | 11,2564  | 18,2294 | 0,695528  | -0,971589  | 0,331255   | 0,607627   | no  |
| AN8819 | ChrIII_A_nidulans_FGSC_A4:2707980-2709094 | WT_5hasex | WT_veg | OK | 22,725   | 95,1987 | 2,06666   | -3,71463   | 0,0002035  | 0,00202429 | yes |
| AN8821 | ChrIII_A_nidulans_FGSC_A4:2694474-2696632 | WT_5hasex | WT_veg | OK | 31,9482  | 28,8291 | -0,148212 | 0,300769   | 0,763591   | 0,902531   | no  |
| AN8822 | ChrIII_A_nidulans_FGSC_A4:2693641-2694418 | WT_5hasex | WT_veg | OK | 25,9703  | 59,1289 | 1,187     | -2,08928   | 0,0366829  | 0,141478   | no  |
| AN8823 | ChrIII_A_nidulans_FGSC_A4:2687836-2690548 | WT_5hasex | WT_veg | OK | 8,81247  | 19,3578 | 1,1353    | -2,08546   | 0,037028   | 0,14246    | no  |
| AN8824 | ChrIII_A_nidulans_FGSC_A4:2686276-2687440 | WT_5hasex | WT_veg | OK | 144,638  | 301,376 | 1,05912   | -2,0042    | 0,0450485  | 0,164699   | no  |
| AN8825 | ChrIII_A_nidulans_FGSC_A4:2682030-2685197 | WT_5hasex | WT_veg | OK | 3,61888  | 19,5907 | 2,43655   | -4,02291   | 5,7485E-05 | 0,00067616 | yes |
| AN8826 | ChrIII_A_nidulans_FGSC_A4:2675974-2677184 | WT_5hasex | WT_veg | OK | 12,4064  | 22,346  | 0,848931  | -1,30312   | 0,192535   | 0,444052   | no  |
| AN8828 | ChrIII_A_nidulans_FGSC_A4:2670628-2671337 | WT_5hasex | WT_veg | OK | 39,9866  | 46,6214 | 0,221475  | -0,385387  | 0,699951   | 0,86929    | no  |
| AN8829 | ChrIII_A_nidulans_FGSC_A4:2669664-2670496 | WT_5hasex | WT_veg | OK | 29,2339  | 36,4185 | 0,317028  | -0,566716  | 0,570907   | 0,795614   | no  |
| AN8833 | ChrIII_A_nidulans_FGSC_A4:2653189-2654516 | WT_5hasex | WT_veg | OK | 28,9726  | 14,7347 | -0,975471 | 1,84492    | 0,0650488  | 0,214019   | no  |
| AN8834 | ChrIII_A_nidulans_FGSC_A4:2651751-2653059 | WT_5hasex | WT_veg | OK | 12,3841  | 138,127 | 3,47943   | -5,88598   | 3,957E-09  | 1,2439E-07 | yes |
| AN8836 | ChrIII_A_nidulans_FGSC_A4:2643492-2646118 | WT_5hasex | WT_veg | OK | 33,5946  | 52,5737 | 0,646115  | -1,33804   | 0,180884   | 0,427487   | no  |
| AN8837 | ChrIII_A_nidulans_FGSC_A4:2640020-2641829 | WT_5hasex | WT_veg | OK | 103,025  | 106,119 | 0,0426851 | -0,0852336 | 0,932076   | 0,974233   | no  |
| AN8839 | ChrIII_A_nidulans_FGSC_A4:2626829-2629320 | WT_5hasex | WT_veg | OK | 26,2239  | 58,171  | 1,14942   | -2,31396   | 0,0206697  | 0,0914344  | no  |
| AN8840 | ChrIII_A_nidulans_FGSC_A4:2624867-2626250 | WT_5hasex | WT_veg | OK | 0,785442 | 9,96736 | 3,66564   | -2,95083   | 0,00316922 | 0,0204574  | yes |
| AN8841 | ChrIII_A_nidulans_FGSC_A4:2622646-2624038 | WT_5hasex | WT_veg | OK | 15,9629  | 19,3623 | 0,278528  | -0,504228  | 0,614101   | 0,821464   | no  |
| AN8843 | ChrIII_A_nidulans_FGSC_A4:2614971-2616329 | WT_5hasex | WT_veg | OK | 52,4819  | 56,0474 | 0,0948277 | -0,187772  | 0,851055   | 0,941399   | no  |
| AN8844 | ChrIII_A_nidulans_FGSC_A4:2613194-2613734 | WT_5hasex | WT_veg | OK | 246,586  | 630,67  | 1,35479   | -2,80248   | 0,00507113 | 0,0300812  | yes |
| AN8845 | ChrIII_A_nidulans_FGSC_A4:2610668-2612373 | WT_5hasex | WT_veg | OK | 84,0248  | 108,558 | 0,369581  | -0,76741   | 0,442838   | 0,706615   | no  |
| AN8846 | ChrIII_A_nidulans_FGSC_A4:2607551-2609682 | WT_5hasex | WT_veg | OK | 52,6814  | 107,184 | 1,02473   | -2,12799   | 0,0333377  | 0,131658   | no  |
| AN8849 | ChrIII_A_nidulans_FGSC_A4:2601914-2603485 | WT_5hasex | WT_veg | OK | 9,67898  | 23,8819 | 1,30299   | -2,16801   | 0,0301581  | 0,12179    | no  |
| AN8850 | ChrIII_A_nidulans_FGSC_A4:2600408-2601799 | WT_5hasex | WT_veg | OK | 101,555  | 153,969 | 0,60038   | -1,24038   | 0,214834   | 0,474469   | no  |
| AN8854 | ChrIII_A_nidulans_FGSC_A4:2587743-2589645 | WT_5hasex | WT_veg | OK | 28,5746  | 37,5159 | 0,39277   | -0,741587  | 0,458338   | 0,718773   | no  |
| AN8855 | ChrIII_A_nidulans_FGSC_A4:2586846-2587742 | WT_5hasex | WT_veg | OK | 16,5666  | 101,004 | 2,60806   | -4,45073   | 8,558E-06  | 0,00012523 | yes |
| AN8856 | ChrIII_A_nidulans_FGSC_A4:2585563-2586620 | WT_5hasex | WT_veg | OK | 1392,26  | 2138,53 | 0,619193  | -1,0875    | 0,276815   | 0,55002    | no  |
| AN8857 | ChrIII_A_nidulans_FGSC_A4:2584004-2584693 | WT_5hasex | WT_veg | OK | 57,7835  | 129,463 | 1,16381   | -2,21141   | 0,0270075  | 0,111833   | no  |
| AN8859 | ChrIII_A_nidulans_FGSC_A4:2577796-2579487 | WT_5hasex | WT_veg | OK | 25,9411  | 66,2525 | 1,35274   | -2,57325   | 0,0100749  | 0,0524117  | no  |
| AN8860 | ChrIII_A_nidulans_FGSC_A4:2573594-2575297 | WT_5hasex | WT_veg | OK | 51,0716  | 138,395 | 1,43819   | -2,67082   | 0,00756653 | 0,0417238  | yes |
| AN8861 | ChrIII_A_nidulans_FGSC_A4:2573594-2575297 | WT_5hasex | WT_veg | OK | 61,688   | 127,618 | 1,04877   | -2,06363   | 0,0390532  | 0,148219   | no  |
| AN8862 | ChrIII_A_nidulans_FGSC_A4:2568236-2573236 | WT_5hasex | WT_veg | OK | 55,6475  | 95,6363 | 0,781242  | -1,54738   | 0,121772   | 0,330918   | no  |
| AN8863 | ChrIII_A_nidulans_FGSC_A4:2565633-2567644 | WT_5hasex | WT_veg | OK | 409,038  | 1824,48 | 2,15718   | -3,7911    | 0,00014998 | 0,00155444 | yes |
| AN8864 | ChrIII_A_nidulans_FGSC_A4:2559401-2564764 | WT_5hasex | WT_veg | OK | 36,9914  | 77,6923 | 1,07058   | -2,15449   | 0,0312016  | 0,125126   | no  |
| AN8866 | ChrIII_A_nidulans_FGSC_A4:2554687-2556901 | WT_5hasex | WT_veg | OK | 228,649  | 562,553 | 1,29885   | -2,31609   | 0,0205536  | 0,0910747  | no  |
| AN8867 | ChrIII_A_nidulans_FGSC_A4:2551954-2554110 | WT_5hasex | WT_veg | OK | 230,742  | 347,318 | 0,589976  | -1,14541   | 0,252041   | 0,520901   | no  |
| AN8869 | ChrIII_A_nidulans_FGSC_A4:2545174-2546867 | WT_5hasex | WT_veg | OK | 147,578  | 274,689 | 0,896321  | -1,83228   | 0,0669097  | 0,218382   | no  |
| AN8870 | ChrIII_A_nidulans_FGSC_A4:2543024-2544288 | WT_5hasex | WT_veg | OK | 1951,63  | 3316,24 | 0,764867  | -1,15988   | 0,246098   | 0,513847   | no  |
| AN8871 | ChrVII_A_nidulans_FGSC_A4:605090-607137   | WT_5hasex | WT_veg | OK | 11,0449  | 54,8126 | 2,31113   | -4,23374   | 2,2983E-05 | 0,00030147 | yes |
| AN8872 | ChrVII_A_nidulans_FGSC_A4:602335-603246   | WT_5hasex | WT_veg | OK | 40,5207  | 54,6138 | 0,430607  | -0,834057  | 0,404249   | 0,675471   | no  |
| AN8874 | ChrVII_A_nidulans_FGSC_A4:593499-596360   | WT_5hasex | WT_veg | OK | 76,8234  | 192,96  | 1,32868   | -2,69389   | 0,00706241 | 0,039379   | yes |
| AN8875 | ChrVII_A_nidulans_FGSC_A4:591831-593372   | WT_5hasex | WT_veg | OK | 15,1     | 23,934  | 0,664515  | -1,11629   | 0,264298   | 0,535349   | no  |
| AN8876 | ChrVII_A_nidulans_FGSC_A4:589180-591623   | WT_5hasex | WT_veg | OK | 17,2357  | 82,4331 | 2,25783   | -4,49234   | 7,0446E-06 | 0,00010544 | yes |
| AN8877 | ChrVII_A_nidulans_FGSC_A4:586652-588788   | WT_5hasex | WT_veg | OK | 32,0008  | 24,8861 | -0,362765 | 0,732637   | 0,46378    | 0,72306    | no  |
| AN8878 | ChrVII_A_nidulans_FGSC_A4:584051-585393   | WT_5hasex | WT_veg | OK | 68,5708  | 139,551 | 1,02513   | -2,1237    | 0,0336954  | 0,13279    | no  |
| AN8879 | ChrVII_A_nidulans_FGSC_A4:580632-583516   | WT_5hasex | WT_veg | OK | 27,261   | 46,6099 | 0,773798  | -1,58265   | 0,1135     | 0,315702   | no  |
| AN8882 | ChrVII_A_nidulans_FGSC_A4:568281-569326   | WT_5hasex | WT_veg | OK | 14,4486  | 20,3117 | 0,491377  | -0,816455  | 0,41424    | 0,68341    | no  |
| AN8883 | ChrVII_A_nidulans_FGSC_A4:567219-568150   | WT_5hasex | WT_veg | OK | 136,761  | 168,584 | 0,301812  | -0,623129  | 0,5332     | 0,771957   | no  |
| AN8885 | ChrVII_A_nidulans_FGSC_A4:556063-559081   | WT_5hasex | WT_veg | OK | 5,24094  | 3,95414 | -0,40646  | 0,657761   | 0,510692   | 0,756524   | no  |
| AN8886 | ChrVII_A_nidulans_FGSC_A4:551919-554812   | WT_5hasex | WT_veg | OK | 27,1001  | 19,658  | -0,463176 | 0,949847   | 0,34219    | 0,61775    | no  |
| AN8888 | ChrVII_A_nidulans_FGSC_A4:548177-548707   | WT_5hasex | WT_veg | OK | 29,0445  | 118,137 | 2,02412   | -3,46294   | 0,00053432 | 0,00460362 | yes |
| AN8889 | ChrVII_A_nidulans_FGSC_A4:546306-548062   | WT_5hasex | WT_veg | OK | 4,07411  | 6,57733 | 0,691018  | -0,96699   | 0,333549   | 0,609904   | no  |

## Supplementary table 1

|        |                                         |           |        |        |          |          |               |               |            |            |     |
|--------|-----------------------------------------|-----------|--------|--------|----------|----------|---------------|---------------|------------|------------|-----|
| AN8890 | ChrVII_A_nidulans_FGSC_A4:542215-543510 | WT_5hasex | WT_veg | OK     | 16,9477  | 1,49167  | -3,50609      | 3,69242       | 0,00022213 | 0,00218068 | yes |
| AN8892 | ChrVII_A_nidulans_FGSC_A4:533261-537973 | WT_5hasex | WT_veg | OK     | 11,7261  | 31,3125  | 1,41701       | -2,82039      | 0,00479658 | 0,0287784  | yes |
| AN8893 | ChrVII_A_nidulans_FGSC_A4:531151-532862 | WT_5hasex | WT_veg | OK     | 5,40203  | 4,98272  | -0,116567     | 0,13335       | 0,893917   | 0,959453   | no  |
| AN8894 | ChrVII_A_nidulans_FGSC_A4:528278-530658 | WT_5hasex | WT_veg | OK     | 17,2759  | 6,28894  | -1,45787      | 2,73924       | 0,00615819 | 0,0352742  | yes |
| AN8896 | ChrVII_A_nidulans_FGSC_A4:522449-523594 | WT_5hasex | WT_veg | OK     | 19,1534  | 5,0844   | -1,91345      | 2,89514       | 0,00378993 | 0,0237588  | yes |
| AN8897 | ChrVII_A_nidulans_FGSC_A4:521015-522186 | WT_5hasex | WT_veg | OK     | 4,17737  | 2,29291  | -0,865418     | 0,946753      | 0,343765   | 0,619107   | no  |
| AN8898 | ChrVII_A_nidulans_FGSC_A4:519095-520556 | WT_5hasex | WT_veg | OK     | 8,24214  | 5,25976  | -0,648021     | 0,975908      | 0,32911    | 0,605613   | no  |
| AN8899 | ChrVII_A_nidulans_FGSC_A4:517706-518858 | WT_5hasex | WT_veg | OK     | 4,80765  | 6,29308  | 0,388435      | -0,527579     | 0,597792   | 0,811893   | no  |
| AN8900 | ChrVII_A_nidulans_FGSC_A4:515476-517157 | WT_5hasex | WT_veg | OK     | 2,0568   | 0,849395 | -1,27589      | 1,20638       | 0,227672   | 0,490703   | no  |
| AN8901 | ChrVII_A_nidulans_FGSC_A4:513571-515149 | WT_5hasex | WT_veg | OK     | 2,10465  | 0,825298 | -1,35059      | 1,17595       | 0,239614   | 0,505471   | no  |
| AN8902 | ChrVII_A_nidulans_FGSC_A4:510902-513256 | WT_5hasex | WT_veg | OK     | 3,20917  | 4,70179  | 0,551008      | -0,810994     | 0,417369   | 0,686256   | no  |
| AN8903 | ChrVII_A_nidulans_FGSC_A4:508260-510475 | WT_5hasex | WT_veg | OK     | 177,59   | 194,868  | 0,133947      | -0,195466     | 0,845028   | 0,938831   | no  |
| AN8906 | ChrVII_A_nidulans_FGSC_A4:497691-498525 | WT_5hasex | WT_veg | OK     | 45,8467  | 25,2283  | -0,861776     | 1,64504       | 0,099961   | 0,289246   | no  |
| AN8907 | ChrVII_A_nidulans_FGSC_A4:495991-497066 | WT_5hasex | WT_veg | OK     | 1407,24  | 799,97   | -0,814849     | 1,344         | 0,178949   | 0,424558   | no  |
| AN8908 | ChrVII_A_nidulans_FGSC_A4:491879-492728 | WT_5hasex | WT_veg | OK     | 2,78032  | 1,98413  | -0,486749     | 0,443632      | 0,657308   | 0,84559    | no  |
| AN8909 | ChrVII_A_nidulans_FGSC_A4:489392-490520 | WT_5hasex | WT_veg | NOTEST | 0        | 0,768112 | 1.79769e+308  | 1.79769e+308  | 0,123323   | 1          | no  |
| AN8910 | ChrVII_A_nidulans_FGSC_A4:481319-489055 | WT_5hasex | WT_veg | OK     | 5,96852  | 19,983   | 1,74333       | -3,55629      | 0,00037612 | 0,00340833 | yes |
| AN8911 | ChrVII_A_nidulans_FGSC_A4:475051-476707 | WT_5hasex | WT_veg | NOTEST | 0,489703 | 0,552953 | 0,17525       | -0,113689     | 0,909484   | 1          | no  |
| AN8912 | ChrVII_A_nidulans_FGSC_A4:472132-473780 | WT_5hasex | WT_veg | NOTEST | 0,533268 | 0        | -1.79769e+308 | -1.79769e+308 | 0,081629   | 1          | no  |
| AN8913 | ChrVII_A_nidulans_FGSC_A4:471031-471699 | WT_5hasex | WT_veg | NOTEST | 0,96417  | 2,94419  | 1,61051       | -1,29006      | 0,197029   | 1          | no  |
| AN8914 | ChrVII_A_nidulans_FGSC_A4:467392-469493 | WT_5hasex | WT_veg | OK     | 1,12362  | 6,80787  | 2,59905       | -3,03222      | 0,00242762 | 0,016406   | yes |
| AN8915 | ChrVII_A_nidulans_FGSC_A4:462996-465066 | WT_5hasex | WT_veg | OK     | 160,018  | 324,294  | 1,01907       | -1,56798      | 0,116886   | 0,321831   | no  |
| AN8916 | ChrVII_A_nidulans_FGSC_A4:444647-446898 | WT_5hasex | WT_veg | NOTEST | 0,107726 | 0,449996 | 2,06254       | -0,867633     | 0,385595   | 1          | no  |
| AN8917 | ChrVII_A_nidulans_FGSC_A4:442581-443667 | WT_5hasex | WT_veg | OK     | 8,65652  | 22,3329  | 1,36731       | -2,04134      | 0,0412168  | 0,154117   | no  |
| AN8918 | ChrVII_A_nidulans_FGSC_A4:434878-437001 | WT_5hasex | WT_veg | OK     | 4,05192  | 8,73684  | 1,10851       | -1,51448      | 0,129903   | 0,345157   | no  |
| AN8920 | ChrVII_A_nidulans_FGSC_A4:431235-432767 | WT_5hasex | WT_veg | OK     | 1,0487   | 4,55011  | 2,11729       | -2,40079      | 0,0163598  | 0,0765094  | no  |
| AN8921 | ChrVII_A_nidulans_FGSC_A4:428316-430553 | WT_5hasex | WT_veg | NOTEST | 1,61134  | 0,337028 | -2,25732      | 1,49187       | 0,135734   | 1          | no  |
| AN8922 | ChrVII_A_nidulans_FGSC_A4:426517-427134 | WT_5hasex | WT_veg | NOTEST | 0        | 0        | 0             | 0             | 1          | 1          | no  |
| AN8923 | ChrVII_A_nidulans_FGSC_A4:422683-425146 | WT_5hasex | WT_veg | NOTEST | 0,419558 | 2,75201  | 2,71355       | -2,63247      | 0,00847666 | 1          | no  |
| AN8924 | ChrVII_A_nidulans_FGSC_A4:420661-422271 | WT_5hasex | WT_veg | OK     | 15,5026  | 38,7715  | 1,32249       | -2,38482      | 0,0170874  | 0,0790933  | no  |
| AN8925 | ChrVII_A_nidulans_FGSC_A4:418117-418824 | WT_5hasex | WT_veg | NOTEST | 0        | 0        | 0             | 0             | 1          | 1          | no  |
| AN8926 | ChrVII_A_nidulans_FGSC_A4:415244-416148 | WT_5hasex | WT_veg | NOTEST | 0        | 0        | 0             | 0             | 1          | 1          | no  |
| AN8927 | ChrVII_A_nidulans_FGSC_A4:411877-412945 | WT_5hasex | WT_veg | NOTEST | 0        | 0        | 0             | 0             | 1          | 1          | no  |
| AN8930 | ChrVII_A_nidulans_FGSC_A4:395154-397650 | WT_5hasex | WT_veg | OK     | 10,2957  | 77,5241  | 2,9126        | -5,34654      | 8,9652E-08 | 2,1124E-06 | yes |
| AN8931 | ChrVII_A_nidulans_FGSC_A4:393525-394854 | WT_5hasex | WT_veg | OK     | 5,91533  | 17,9464  | 1,60116       | -2,31921      | 0,0203837  | 0,0904585  | no  |
| AN8932 | ChrVII_A_nidulans_FGSC_A4:392046-393305 | WT_5hasex | WT_veg | OK     | 19,3263  | 52,0266  | 1,42868       | -2,45898      | 0,0139331  | 0,0675428  | no  |
| AN8933 | ChrVII_A_nidulans_FGSC_A4:389980-390985 | WT_5hasex | WT_veg | OK     | 2,31787  | 4,51043  | 0,960465      | -1,105        | 0,26916    | 0,540962   | no  |
| AN8934 | ChrVII_A_nidulans_FGSC_A4:388128-389427 | WT_5hasex | WT_veg | NOTEST | 0,570136 | 0,629702 | 0,143364      | -0,0934301    | 0,925562   | 1          | no  |
| AN8935 | ChrVII_A_nidulans_FGSC_A4:384170-386580 | WT_5hasex | WT_veg | NOTEST | 0,842819 | 0,358831 | -1,23192      | 0,846748      | 0,397136   | 1          | no  |
| AN8936 | ChrVII_A_nidulans_FGSC_A4:381492-383223 | WT_5hasex | WT_veg | OK     | 7,79118  | 19,5098  | 1,32428       | -2,01394      | 0,0440162  | 0,161789   | no  |
| AN8937 | ChrVII_A_nidulans_FGSC_A4:380217-381060 | WT_5hasex | WT_veg | OK     | 4,10027  | 8,9976   | 1,13382       | -1,46559      | 0,142761   | 0,367179   | no  |
| AN8938 | ChrVII_A_nidulans_FGSC_A4:378148-380171 | WT_5hasex | WT_veg | OK     | 7,91026  | 18,3713  | 1,21566       | -2,02391      | 0,0429794  | 0,158976   | no  |
| AN8939 | ChrVII_A_nidulans_FGSC_A4:376169-377375 | WT_5hasex | WT_veg | OK     | 3,45146  | 19,6835  | 2,5117        | -3,50843      | 0,00045075 | 0,00398655 | yes |
| AN8940 | ChrVII_A_nidulans_FGSC_A4:372550-374659 | WT_5hasex | WT_veg | OK     | 2,84098  | 2,16572  | -0,391539     | 0,485942      | 0,627008   | 0,828439   | no  |
| AN8941 | ChrVII_A_nidulans_FGSC_A4:367587-370498 | WT_5hasex | WT_veg | NOTEST | 0,443147 | 0,679517 | 0,616725      | -0,531318     | 0,595199   | 1          | no  |
| AN8942 | ChrVII_A_nidulans_FGSC_A4:365578-366433 | WT_5hasex | WT_veg | OK     | 38,6523  | 34,8791  | -0,148193     | 0,276351      | 0,782279   | 0,911157   | no  |
| AN8943 | ChrVII_A_nidulans_FGSC_A4:359936-361503 | WT_5hasex | WT_veg | OK     | 29,0439  | 34,7485  | 0,258715      | -0,457729     | 0,647147   | 0,839983   | no  |
| AN8944 | ChrVII_A_nidulans_FGSC_A4:356850-358177 | WT_5hasex | WT_veg | NOTEST | 0,22269  | 0,203434 | -0,130478     | 0,0368246     | 0,970625   | 1          | no  |
| AN8945 | ChrVII_A_nidulans_FGSC_A4:354206-355824 | WT_5hasex | WT_veg | OK     | 147,633  | 344,392  | 1,22204       | -2,52099      | 0,0117026  | 0,0589653  | no  |
| AN8948 | ChrVII_A_nidulans_FGSC_A4:342345-343093 | WT_5hasex | WT_veg | NOTEST | 0        | 0        | 0             | 0             | 1          | 1          | no  |
| AN8949 | ChrVII_A_nidulans_FGSC_A4:337845-338832 | WT_5hasex | WT_veg | NOTEST | 0,770751 | 0        | -1.79769e+308 | -1.79769e+308 | 0,0537957  | 1          | no  |
| AN8950 | ChrVII_A_nidulans_FGSC_A4:336702-337444 | WT_5hasex | WT_veg | NOTEST | 0        | 0        | 0             | 0             | 1          | 1          | no  |
| AN8951 | ChrVII_A_nidulans_FGSC_A4:323395-324724 | WT_5hasex | WT_veg | NOTEST | 0        | 0,7704   | 1.79769e+308  | 1.79769e+308  | 0,123323   | 1          | no  |

# Supplementary table 1

|        |                                         |           |        |        |          |          |               |               |            |            |     |
|--------|-----------------------------------------|-----------|--------|--------|----------|----------|---------------|---------------|------------|------------|-----|
| AN8955 | ChrVII_A_nidulans_FGSC_A4:306361-308105 | WT_5hasex | WT_veg | OK     | 1,40672  | 8,72712  | 2,63317       | -2,76198      | 0,00574526 | 0,0333256  | yes |
| AN8956 | ChrVII_A_nidulans_FGSC_A4:303030-304902 | WT_5hasex | WT_veg | OK     | 0,407641 | 4,20245  | 3,36586       | -3,80418      | 0,00014227 | 0,00148663 | yes |
| AN8957 | ChrVII_A_nidulans_FGSC_A4:295095-300158 | WT_5hasex | WT_veg | NOTEST | 0,276938 | 0,459705 | 0,731146      | -0,695856     | 0,486519   | 1          | no  |
| AN8958 | ChrVII_A_nidulans_FGSC_A4:293609-294484 | WT_5hasex | WT_veg | OK     | 14,4607  | 15,2254  | 0,074346      | -0,114026     | 0,909217   | 0,965505   | no  |
| AN8959 | ChrVII_A_nidulans_FGSC_A4:292526-293164 | WT_5hasex | WT_veg | OK     | 176,38   | 589,261  | 1,74022       | -3,57733      | 0,00034713 | 0,00318587 | yes |
| AN8960 | ChrVII_A_nidulans_FGSC_A4:290532-291489 | WT_5hasex | WT_veg | NOTEST | 0,262563 | 0        | -1.79769e+308 | -1.79769e+308 | 0,224063   | 1          | no  |
| AN8961 | ChrVII_A_nidulans_FGSC_A4:285002-287627 | WT_5hasex | WT_veg | OK     | 1,29908  | 3,91528  | 1,59163       | -2,12763      | 0,0333678  | 0,131737   | no  |
| AN8962 | ChrVII_A_nidulans_FGSC_A4:283390-284080 | WT_5hasex | WT_veg | OK     | 2,89286  | 26,6153  | 3,20169       | -4,06004      | 4,9064E-05 | 0,00058861 | yes |
| AN8963 | ChrVII_A_nidulans_FGSC_A4:280566-281047 | WT_5hasex | WT_veg | OK     | 16,9464  | 50,0531  | 1,56248       | -2,15218      | 0,0313831  | 0,125713   | no  |
| AN8964 | ChrVII_A_nidulans_FGSC_A4:277629-279318 | WT_5hasex | WT_veg | OK     | 9,0794   | 21,8197  | 1,26496       | -2,10831      | 0,0350043  | 0,136551   | no  |
| AN8966 | ChrVII_A_nidulans_FGSC_A4:269430-271731 | WT_5hasex | WT_veg | OK     | 4,60156  | 7,28055  | 0,661926      | -0,972213     | 0,330945   | 0,607282   | no  |
| AN8967 | ChrVII_A_nidulans_FGSC_A4:265354-266874 | WT_5hasex | WT_veg | OK     | 33,5819  | 52,5321  | 0,645514      | -1,2484       | 0,211884   | 0,470772   | no  |
| AN8968 | ChrVII_A_nidulans_FGSC_A4:264168-265260 | WT_5hasex | WT_veg | OK     | 17,8574  | 53,2905  | 1,57736       | -2,6398       | 0,00829539 | 0,0448601  | yes |
| AN8969 | ChrVII_A_nidulans_FGSC_A4:263224-264096 | WT_5hasex | WT_veg | OK     | 90,1846  | 33,4341  | -1,43156      | 2,30665       | 0,0210742  | 0,0928085  | no  |
| AN8970 | ChrVII_A_nidulans_FGSC_A4:261234-262197 | WT_5hasex | WT_veg | OK     | 10,6998  | 0,213966 | -5,64406      | 1,90394       | 0,0569181  | 0,194599   | no  |
| AN8971 | ChrVII_A_nidulans_FGSC_A4:259310-260843 | WT_5hasex | WT_veg | NOTEST | 0,945705 | 2,53707  | 1,4237        | -1,2951       | 0,195287   | 1          | no  |
| AN8972 | ChrVII_A_nidulans_FGSC_A4:252140-254065 | WT_5hasex | WT_veg | OK     | 3,50516  | 37,1568  | 3,40608       | -5,07766      | 3,8211E-07 | 7,7791E-06 | yes |
| AN8973 | ChrVII_A_nidulans_FGSC_A4:247575-249573 | WT_5hasex | WT_veg | OK     | 3,51681  | 6,35291  | 0,85315       | -1,2442       | 0,213426   | 0,472594   | no  |
| AN8974 | ChrVII_A_nidulans_FGSC_A4:245681-246975 | WT_5hasex | WT_veg | OK     | 49,2473  | 161,854  | 1,71658       | -3,06301      | 0,00219123 | 0,0150847  | yes |
| AN8975 | ChrVII_A_nidulans_FGSC_A4:243327-244279 | WT_5hasex | WT_veg | OK     | 10,6485  | 80,4474  | 2,9174        | -4,68029      | 2,8647E-06 | 4,7161E-05 | yes |
| AN8976 | ChrVII_A_nidulans_FGSC_A4:240293-240999 | WT_5hasex | WT_veg | NOTEST | 0        | 0        | 0             | 0             | 1          | 1          | no  |
| AN8983 | ChrVII_A_nidulans_FGSC_A4:222602-224668 | WT_5hasex | WT_veg | OK     | 122,092  | 947,679  | 2,95643       | -4,37329      | 1,2239E-05 | 0,0001719  | yes |
| AN8984 | ChrVII_A_nidulans_FGSC_A4:220613-222093 | WT_5hasex | WT_veg | OK     | 1,8023   | 4,80386  | 1,41435       | -1,5722       | 0,115903   | 0,319904   | no  |
| AN8985 | ChrVII_A_nidulans_FGSC_A4:217280-218962 | WT_5hasex | WT_veg | NOTEST | 0,150014 | 0,51962  | 1,79236       | -0,788427     | 0,430447   | 1          | no  |
| AN8986 | ChrVII_A_nidulans_FGSC_A4:215467-216779 | WT_5hasex | WT_veg | OK     | 7,87682  | 0,653575 | -3,59119      | 2,62303       | 0,00871525 | 0,0467304  | yes |
| AN8987 | ChrVII_A_nidulans_FGSC_A4:210490-212244 | WT_5hasex | WT_veg | NOTEST | 0,560729 | 1,39828  | 1,31828       | -1,05004      | 0,293701   | 1          | no  |
| AN8988 | ChrVII_A_nidulans_FGSC_A4:209201-210298 | WT_5hasex | WT_veg | OK     | 15,161   | 51,8847  | 1,77494       | -2,99627      | 0,00273308 | 0,0180764  | yes |
| AN8989 | ChrVII_A_nidulans_FGSC_A4:208083-208649 | WT_5hasex | WT_veg | OK     | 7,84146  | 6,93291  | -0,177661     | 0,186878      | 0,851756   | 0,941769   | no  |
| AN8990 | ChrVII_A_nidulans_FGSC_A4:205020-207020 | WT_5hasex | WT_veg | OK     | 182,19   | 319,697  | 0,811261      | -1,63723      | 0,101582   | 0,2928     | no  |
| AN8991 | ChrVII_A_nidulans_FGSC_A4:203562-204378 | WT_5hasex | WT_veg | NOTEST | 0        | 0        | 0             | 0             | 1          | 1          | no  |
| AN8992 | ChrVII_A_nidulans_FGSC_A4:201293-202432 | WT_5hasex | WT_veg | NOTEST | 0,485424 | 0        | -1.79769e+308 | -1.79769e+308 | 0,107729   | 1          | no  |
| AN8994 | ChrVII_A_nidulans_FGSC_A4:194446-195387 | WT_5hasex | WT_veg | OK     | 4,08865  | 11,6844  | 1,51489       | -2,04844      | 0,040517   | 0,152232   | no  |
| AN8995 | ChrVII_A_nidulans_FGSC_A4:192842-193974 | WT_5hasex | WT_veg | NOTEST | 0,164747 | 2,29779  | 3,80192       | -2,35502      | 0,0185219  | 1          | no  |
| AN8996 | ChrVII_A_nidulans_FGSC_A4:190604-192377 | WT_5hasex | WT_veg | NOTEST | 0,331389 | 1,17485  | 1,82588       | -1,33714      | 0,181175   | 1          | no  |
| AN8997 | ChrVII_A_nidulans_FGSC_A4:188191-189516 | WT_5hasex | WT_veg | NOTEST | 0        | 0,362103 | 1.79769e+308  | 1.79769e+308  | 0,160511   | 1          | no  |
| AN8998 | ChrVII_A_nidulans_FGSC_A4:185323-186388 | WT_5hasex | WT_veg | OK     | 2,16727  | 0        | -1.79769e+308 | -1.79769e+308 | 0,0525335  | 0,183662   | no  |
| AN8999 | ChrVII_A_nidulans_FGSC_A4:180932-184362 | WT_5hasex | WT_veg | NOTEST | 0,741595 | 2,4232   | 1,70821       | -2,02543      | 0,0428233  | 1          | no  |
| AN9000 | ChrVII_A_nidulans_FGSC_A4:176149-177858 | WT_5hasex | WT_veg | OK     | 3,81844  | 6,36015  | 0,736079      | -0,989707     | 0,322317   | 0,598493   | no  |
| AN9001 | ChrVII_A_nidulans_FGSC_A4:174038-175475 | WT_5hasex | WT_veg | OK     | 71,1018  | 101,434  | 0,512581      | -0,869851     | 0,384382   | 0,658202   | no  |
| AN9002 | ChrVII_A_nidulans_FGSC_A4:168613-169941 | WT_5hasex | WT_veg | OK     | 7,17701  | 13,4647  | 0,907723      | -1,33363      | 0,182325   | 0,429673   | no  |
| AN9003 | ChrVII_A_nidulans_FGSC_A4:164399-168569 | WT_5hasex | WT_veg | OK     | 4,7985   | 8,49567  | 0,824144      | -1,45115      | 0,146738   | 0,373907   | no  |
| AN9004 | ChrVII_A_nidulans_FGSC_A4:161719-163663 | WT_5hasex | WT_veg | OK     | 44,6736  | 6,62868  | -2,75263      | 4,45706       | 8,3091E-06 | 0,0001219  | yes |
| AN9005 | ChrVII_A_nidulans_FGSC_A4:152385-160547 | WT_5hasex | WT_veg | OK     | 0,496982 | 4,36502  | 3,13472       | -4,13723      | 3,5152E-05 | 0,00044046 | yes |
| AN9006 | ChrVII_A_nidulans_FGSC_A4:151065-151647 | WT_5hasex | WT_veg | OK     | 0,467779 | 20,7339  | 5,47002       | -2,84102      | 0,00449702 | 0,0273379  | yes |
| AN9009 | ChrVII_A_nidulans_FGSC_A4:140488-141154 | WT_5hasex | WT_veg | NOTEST | 1,58276  | 2,83123  | 0,838987      | -0,737203     | 0,460999   | 1          | no  |
| AN9010 | ChrVII_A_nidulans_FGSC_A4:137872-139824 | WT_5hasex | WT_veg | NOTEST | 1,02121  | 0        | -1.79769e+308 | -1.79769e+308 | 0,0315813  | 1          | no  |
| AN9011 | ChrVII_A_nidulans_FGSC_A4:135752-137748 | WT_5hasex | WT_veg | NOTEST | 0,78506  | 0,757319 | -0,0519       | 0,0439506     | 0,964944   | 1          | no  |
| AN9012 | ChrVII_A_nidulans_FGSC_A4:133559-134456 | WT_5hasex | WT_veg | NOTEST | 0        | 0,934691 | 1.79769e+308  | 1.79769e+308  | 0,123323   | 1          | no  |
| AN9013 | ChrVII_A_nidulans_FGSC_A4:131162-133462 | WT_5hasex | WT_veg | NOTEST | 0,432816 | 1,3483   | 1,63932       | -1,58352      | 0,113304   | 1          | no  |
| AN9014 | ChrVII_A_nidulans_FGSC_A4:129133-130561 | WT_5hasex | WT_veg | NOTEST | 0        | 0        | 0             | 0             | 1          | 1          | no  |
| AN9015 | ChrVII_A_nidulans_FGSC_A4:126350-128554 | WT_5hasex | WT_veg | NOTEST | 1,79685  | 2,80638  | 0,643237      | -0,819691     | 0,412392   | 1          | no  |
| AN9017 | ChrVII_A_nidulans_FGSC_A4:120619-122820 | WT_5hasex | WT_veg | OK     | 56,8848  | 71,2271  | 0,324383      | -0,654926     | 0,512516   | 0,757798   | no  |
| AN9018 | ChrVII_A_nidulans_FGSC_A4:119670-120491 | WT_5hasex | WT_veg | OK     | 70,0266  | 154,697  | 1,14347       | -2,2851       | 0,0223067  | 0,0967084  | no  |

## Supplementary table 1

|        |                                         |           |        |        |          |          |               |               |            |            |     |
|--------|-----------------------------------------|-----------|--------|--------|----------|----------|---------------|---------------|------------|------------|-----|
| AN9019 | ChrVII_A_nidulans_FGSC_A4:118141-119381 | WT_5hasex | WT_veg | OK     | 4,03176  | 6,18395  | 0,617119      | -0,750494     | 0,452957   | 0,714389   | no  |
| AN9020 | ChrVII_A_nidulans_FGSC_A4:116116-116443 | WT_5hasex | WT_veg | OK     | 1,42845  | 8,95146  | 2,64768       | -1,94895      | 0,0513015  | 0,18069    | no  |
| AN9021 | ChrVII_A_nidulans_FGSC_A4:112516-115618 | WT_5hasex | WT_veg | OK     | 9,26494  | 25,7212  | 1,47311       | -2,78691      | 0,00532137 | 0,0312682  | yes |
| AN9022 | ChrVII_A_nidulans_FGSC_A4:110676-111329 | WT_5hasex | WT_veg | OK     | 12,3514  | 69,6583  | 2,49561       | -3,80424      | 0,00014224 | 0,00148658 | yes |
| AN9023 | ChrVII_A_nidulans_FGSC_A4:108394-110297 | WT_5hasex | WT_veg | OK     | 6,86175  | 70,7538  | 3,36616       | -5,36185      | 8,2373E-08 | 1,9585E-06 | yes |
| AN9024 | ChrVII_A_nidulans_FGSC_A4:107205-108194 | WT_5hasex | WT_veg | OK     | 6,71743  | 34,9355  | 2,37871       | -3,5077       | 0,000452   | 0,00399491 | yes |
| AN9025 | ChrVII_A_nidulans_FGSC_A4:99385-102813  | WT_5hasex | WT_veg | OK     | 14,4437  | 20,0026  | 0,469752      | -0,827342     | 0,408043   | 0,678243   | no  |
| AN9026 | ChrVII_A_nidulans_FGSC_A4:96551-99300   | WT_5hasex | WT_veg | OK     | 3,64032  | 1,54136  | -1,23986      | 1,624         | 0,104375   | 0,298371   | no  |
| AN9027 | ChrVII_A_nidulans_FGSC_A4:94622-95897   | WT_5hasex | WT_veg | OK     | 2,34245  | 0,648939 | -1,85186      | 1,23642       | 0,216302   | 0,476417   | no  |
| AN9028 | ChrVII_A_nidulans_FGSC_A4:92995-94126   | WT_5hasex | WT_veg | OK     | 0,59392  | 4,54519  | 2,936         | -2,97209      | 0,00295783 | 0,019319   | yes |
| AN9029 | ChrVII_A_nidulans_FGSC_A4:90671-92468   | WT_5hasex | WT_veg | NOTEST | 0,179689 | 0,105221 | -0,772088     | 0,241736      | 0,808985   | 1          | no  |
| AN9031 | ChrVII_A_nidulans_FGSC_A4:87192-88132   | WT_5hasex | WT_veg | OK     | 12,6287  | 15,6985  | 0,313925      | -0,44824      | 0,65398    | 0,843946   | no  |
| AN9032 | ChrVII_A_nidulans_FGSC_A4:85840-86941   | WT_5hasex | WT_veg | OK     | 72,0143  | 59,6271  | -0,272317     | 0,459174      | 0,646109   | 0,839402   | no  |
| AN9033 | ChrVII_A_nidulans_FGSC_A4:80728-82476   | WT_5hasex | WT_veg | NOTEST | 0,552514 | 0,14391  | -1,94084      | 0,637869      | 0,523559   | 1          | no  |
| AN9034 | ChrVII_A_nidulans_FGSC_A4:77776-79418   | WT_5hasex | WT_veg | OK     | 0,906326 | 4,18202  | 2,2061        | -2,3637       | 0,0180937  | 0,0824545  | no  |
| AN9036 | ChrVII_A_nidulans_FGSC_A4:70746-72153   | WT_5hasex | WT_veg | NOTEST | 1,09443  | 0,681118 | -0,684203     | 0,461099      | 0,644728   | 1          | no  |
| AN9037 | ChrVII_A_nidulans_FGSC_A4:67512-70705   | WT_5hasex | WT_veg | OK     | 3,04161  | 16,4328  | 2,43367       | -3,91161      | 9,1685E-05 | 0,00101746 | yes |
| AN9038 | ChrVII_A_nidulans_FGSC_A4:65983-67407   | WT_5hasex | WT_veg | OK     | 2,08378  | 9,07533  | 2,12275       | -2,83726      | 0,0045502  | 0,0275844  | yes |
| AN9040 | ChrVII_A_nidulans_FGSC_A4:58875-59415   | WT_5hasex | WT_veg | NOTEST | 0,351786 | 0        | -1.79769e+308 | -1.79769e+308 | 0,165569   | 1          | no  |
| AN9041 | ChrVII_A_nidulans_FGSC_A4:57703-58591   | WT_5hasex | WT_veg | OK     | 2,54925  | 0        | -1.79769e+308 | -1.79769e+308 | 0,0212355  | 0,0933566  | no  |
| AN9043 | ChrVII_A_nidulans_FGSC_A4:52013-54404   | WT_5hasex | WT_veg | NOTEST | 0,131359 | 1,56515  | 3,57471       | -1,68468      | 0,0920503  | 1          | no  |
| AN9044 | ChrVII_A_nidulans_FGSC_A4:50771-51568   | WT_5hasex | WT_veg | NOTEST | 0        | 0        | 0             | 0             | 1          | 1          | no  |
| AN9046 | ChrVII_A_nidulans_FGSC_A4:46802-48498   | WT_5hasex | WT_veg | NOTEST | 0,281659 | 0,185027 | -0,606211     | 0,117364      | 0,906572   | 1          | no  |
| AN9047 | ChrVII_A_nidulans_FGSC_A4:43607-45112   | WT_5hasex | WT_veg | OK     | 17,5939  | 28,2592  | 0,683646      | -1,23354      | 0,217373   | 0,477741   | no  |
| AN9048 | ChrVII_A_nidulans_FGSC_A4:39032-43017   | WT_5hasex | WT_veg | OK     | 9,99342  | 21,4265  | 1,10034       | -2,14599      | 0,031874   | 0,1272     | no  |
| AN9049 | ChrVII_A_nidulans_FGSC_A4:37547-38783   | WT_5hasex | WT_veg | OK     | 17,6354  | 48,4959  | 1,45939       | -2,60312      | 0,00923793 | 0,0489218  | yes |
| AN9050 | ChrVII_A_nidulans_FGSC_A4:35746-37363   | WT_5hasex | WT_veg | NOTEST | 0,384376 | 0        | -1.79769e+308 | -1.79769e+308 | 0,0653486  | 1          | no  |
| AN9051 | ChrVII_A_nidulans_FGSC_A4:34033-35243   | WT_5hasex | WT_veg | OK     | 2,15666  | 2,28045  | 0,0805228     | -0,0876034    | 0,930192   | 0,973566   | no  |
| AN9052 | ChrVII_A_nidulans_FGSC_A4:32616-33323   | WT_5hasex | WT_veg | NOTEST | 0        | 0        | 0             | 0             | 1          | 1          | no  |
| AN9053 | ChrVII_A_nidulans_FGSC_A4:29724-30510   | WT_5hasex | WT_veg | NOTEST | 0,305274 | 0        | -1.79769e+308 | -1.79769e+308 | 0,23809    | 1          | no  |
| AN9054 | ChrVII_A_nidulans_FGSC_A4:24501-25603   | WT_5hasex | WT_veg | NOTEST | 0,171718 | 0        | -1.79769e+308 | -1.79769e+308 | 0,165569   | 1          | no  |
| AN9055 | ChrVII_A_nidulans_FGSC_A4:20645-21184   | WT_5hasex | WT_veg | NOTEST | 0        | 0        | 0             | 0             | 1          | 1          | no  |
| AN9056 | ChrVII_A_nidulans_FGSC_A4:13793-17437   | WT_5hasex | WT_veg | NOTEST | 0,860911 | 0        | -1.79769e+308 | -1.79769e+308 | 0,0315813  | 1          | no  |
| AN9057 | ChrVI_A_nidulans_FGSC_A4:567223-568994  | WT_5hasex | WT_veg | OK     | 74,9907  | 94,1128  | 0,327679      | -0,678817     | 0,497254   | 0,7478     | no  |
| AN9059 | ChrVI_A_nidulans_FGSC_A4:558732-560309  | WT_5hasex | WT_veg | OK     | 39,0384  | 72,2029  | 0,887162      | -1,78516      | 0,0742356  | 0,234941   | no  |
| AN9060 | ChrVI_A_nidulans_FGSC_A4:556673-558261  | WT_5hasex | WT_veg | OK     | 28,5139  | 66,5873  | 1,22358       | -2,42843      | 0,0151645  | 0,0721031  | no  |
| AN9061 | ChrVI_A_nidulans_FGSC_A4:554928-556551  | WT_5hasex | WT_veg | OK     | 44,7328  | 66,541   | 0,572912      | -1,18119      | 0,237527   | 0,502985   | no  |
| AN9062 | ChrVI_A_nidulans_FGSC_A4:552578-553800  | WT_5hasex | WT_veg | OK     | 125,96   | 289,311  | 1,19966       | -2,31201      | 0,020777   | 0,091793   | no  |
| AN9063 | ChrVI_A_nidulans_FGSC_A4:547994-552147  | WT_5hasex | WT_veg | OK     | 51,207   | 101,137  | 0,981892      | -2,00008      | 0,0454912  | 0,165866   | no  |
| AN9064 | ChrVI_A_nidulans_FGSC_A4:546354-547595  | WT_5hasex | WT_veg | OK     | 51,3917  | 67,788   | 0,399495      | -0,78056      | 0,435062   | 0,700596   | no  |
| AN9065 | ChrVI_A_nidulans_FGSC_A4:544716-546296  | WT_5hasex | WT_veg | OK     | 108,544  | 240,157  | 1,1457        | -2,35306      | 0,0186197  | 0,0842522  | no  |
| AN9066 | ChrVI_A_nidulans_FGSC_A4:539323-544557  | WT_5hasex | WT_veg | OK     | 75,2818  | 104,221  | 0,469278      | -0,945727     | 0,344288   | 0,169636   | no  |
| AN9068 | ChrVI_A_nidulans_FGSC_A4:536914-538250  | WT_5hasex | WT_veg | OK     | 112,646  | 132,317  | 0,232203      | -0,455019     | 0,649095   | 0,841033   | no  |
| AN9069 | ChrVI_A_nidulans_FGSC_A4:533027-534941  | WT_5hasex | WT_veg | OK     | 65,7908  | 189,334  | 1,52497       | -2,82326      | 0,00475384 | 0,0285808  | yes |
| AN9070 | ChrVI_A_nidulans_FGSC_A4:526235-527448  | WT_5hasex | WT_veg | OK     | 22,2558  | 46,7451  | 1,07064       | -1,9991       | 0,0455974  | 0,166138   | no  |
| AN9071 | ChrVI_A_nidulans_FGSC_A4:523236-525641  | WT_5hasex | WT_veg | OK     | 70,1887  | 168,758  | 1,26565       | -2,60894      | 0,0090823  | 0,0482786  | yes |
| AN9072 | ChrVI_A_nidulans_FGSC_A4:521432-522734  | WT_5hasex | WT_veg | OK     | 27,1137  | 59,8184  | 1,14157       | -2,14481      | 0,031968   | 0,127478   | no  |
| AN9073 | ChrVI_A_nidulans_FGSC_A4:520270-520955  | WT_5hasex | WT_veg | OK     | 341,768  | 509,857  | 0,577076      | -1,15283      | 0,248978   | 0,51708    | no  |
| AN9074 | ChrVI_A_nidulans_FGSC_A4:518618-519361  | WT_5hasex | WT_veg | OK     | 33,2747  | 257,925  | 2,95445       | -5,34908      | 8,8404E-08 | 2,0849E-06 | yes |
| AN9075 | ChrVI_A_nidulans_FGSC_A4:515872-517436  | WT_5hasex | WT_veg | OK     | 4,08999  | 2,21103  | -0,887378     | 0,836023      | 0,403142   | 0,674482   | no  |
| AN9076 | ChrVI_A_nidulans_FGSC_A4:514242-515351  | WT_5hasex | WT_veg | OK     | 14,0802  | 34,6457  | 1,29901       | -2,12834      | 0,0333088  | 0,131553   | no  |
| AN9077 | ChrVI_A_nidulans_FGSC_A4:502353-507602  | WT_5hasex | WT_veg | OK     | 12,1445  | 37,1593  | 1,61342       | -3,31997      | 0,00090029 | 0,00719597 | yes |
| AN9078 | ChrVI_A_nidulans_FGSC_A4:501439-502053  | WT_5hasex | WT_veg | OK     | 177,691  | 297,895  | 0,745437      | -1,53085      | 0,125806   | 0,337749   | no  |

## Supplementary table 1

|        |                                        |           |        |        |          |         |               |               |            |            |     |
|--------|----------------------------------------|-----------|--------|--------|----------|---------|---------------|---------------|------------|------------|-----|
| AN9079 | ChrVI_A_nidulans_FGSC_A4:496539-500766 | WT_5hasex | WT_veg | OK     | 20,0404  | 37,7836 | 0,914848      | -1,83678      | 0,0662418  | 0,216809   | no  |
| AN9080 | ChrVI_A_nidulans_FGSC_A4:495381-496305 | WT_5hasex | WT_veg | OK     | 245,752  | 333,975 | 0,442534      | -0,915563     | 0,359896   | 0,634535   | no  |
| AN9081 | ChrVI_A_nidulans_FGSC_A4:493547-495341 | WT_5hasex | WT_veg | OK     | 19,5147  | 30,8237 | 0,659483      | -1,25189      | 0,210609   | 0,468981   | no  |
| AN9082 | ChrVI_A_nidulans_FGSC_A4:491369-493150 | WT_5hasex | WT_veg | OK     | 74,8147  | 81,3385 | 0,120616      | -0,249669     | 0,802844   | 0,920372   | no  |
| AN9083 | ChrVI_A_nidulans_FGSC_A4:488338-489036 | WT_5hasex | WT_veg | OK     | 189,376  | 316,371 | 0,740362      | -1,529        | 0,126264   | 0,338594   | no  |
| AN9085 | ChrVI_A_nidulans_FGSC_A4:479760-481134 | WT_5hasex | WT_veg | OK     | 28,8972  | 39,3383 | 0,445004      | -0,8527       | 0,393826   | 0,667031   | no  |
| AN9086 | ChrVI_A_nidulans_FGSC_A4:478470-479500 | WT_5hasex | WT_veg | OK     | 66,3887  | 90,3733 | 0,444958      | -0,873808     | 0,382223   | 0,656299   | no  |
| AN9088 | ChrVI_A_nidulans_FGSC_A4:471210-472476 | WT_5hasex | WT_veg | NOTEST | 0,642373 | 2,41352 | 1,90965       | -1,44863      | 0,147441   | 1          | no  |
| AN9089 | ChrVI_A_nidulans_FGSC_A4:467909-469903 | WT_5hasex | WT_veg | NOTEST | 1,23075  | 2,27411 | 0,885764      | -1,02198      | 0,306791   | 1          | no  |
| AN9091 | ChrVI_A_nidulans_FGSC_A4:459680-460881 | WT_5hasex | WT_veg | OK     | 44,6725  | 84,0007 | 0,911013      | -1,78286      | 0,0746089  | 0,235663   | no  |
| AN9093 | ChrVI_A_nidulans_FGSC_A4:453842-455877 | WT_5hasex | WT_veg | OK     | 68,423   | 147,259 | 1,1058        | -2,17083      | 0,029944   | 0,121215   | no  |
| AN9096 | ChrVI_A_nidulans_FGSC_A4:444248-446193 | WT_5hasex | WT_veg | OK     | 2,45438  | 1,02426 | -1,26077      | 1,31918       | 0,187109   | 0,436547   | no  |
| AN9097 | ChrVI_A_nidulans_FGSC_A4:441463-442585 | WT_5hasex | WT_veg | OK     | 1473,28  | 2347,26 | 0,671948      | -1,11094      | 0,266593   | 0,538261   | no  |
| AN9098 | ChrVI_A_nidulans_FGSC_A4:439635-441289 | WT_5hasex | WT_veg | OK     | 12,4197  | 20,5364 | 0,72555       | -1,21787      | 0,223275   | 0,485117   | no  |
| AN9100 | ChrVI_A_nidulans_FGSC_A4:430796-432438 | WT_5hasex | WT_veg | OK     | 64,8003  | 347,477 | 2,42284       | -5,06325      | 4,1217E-07 | 8,3232E-06 | yes |
| AN9101 | ChrVI_A_nidulans_FGSC_A4:428519-429699 | WT_5hasex | WT_veg | OK     | 46,5674  | 58,8008 | 0,336515      | -0,672243     | 0,501429   | 0,750714   | no  |
| AN9102 | ChrVI_A_nidulans_FGSC_A4:427003-428251 | WT_5hasex | WT_veg | OK     | 13,086   | 74,2132 | 2,50365       | -4,15412      | 3,2654E-05 | 0,00041352 | yes |
| AN9104 | ChrVI_A_nidulans_FGSC_A4:420474-423529 | WT_5hasex | WT_veg | OK     | 20,5532  | 26,9355 | 0,390145      | -0,792866     | 0,427856   | 0,694547   | no  |
| AN9105 | ChrVI_A_nidulans_FGSC_A4:417169-419452 | WT_5hasex | WT_veg | OK     | 27,9838  | 90,1014 | 1,68696       | -3,37949      | 0,00072622 | 0,00597976 | yes |
| AN9106 | ChrVI_A_nidulans_FGSC_A4:415179-417004 | WT_5hasex | WT_veg | OK     | 11,2656  | 60,1215 | 2,41596       | -4,06874      | 4,7269E-05 | 0,00056982 | yes |
| AN9107 | ChrVI_A_nidulans_FGSC_A4:414185-414764 | WT_5hasex | WT_veg | OK     | 233,287  | 515,141 | 1,14286       | -2,32454      | 0,0200968  | 0,0894775  | no  |
| AN9108 | ChrVI_A_nidulans_FGSC_A4:410625-412337 | WT_5hasex | WT_veg | OK     | 67,2837  | 10,4364 | -2,68863      | 4,423         | 9,7339E-06 | 0,00014063 | yes |
| AN9111 | ChrVI_A_nidulans_FGSC_A4:400381-401316 | WT_5hasex | WT_veg | OK     | 19,7814  | 33,0482 | 0,740426      | -1,26947      | 0,204273   | 0,460427   | no  |
| AN9113 | ChrVI_A_nidulans_FGSC_A4:394697-396670 | WT_5hasex | WT_veg | OK     | 8,26037  | 9,25783 | 0,164468      | -0,266352     | 0,789968   | 0,914382   | no  |
| AN9114 | ChrVI_A_nidulans_FGSC_A4:392950-394468 | WT_5hasex | WT_veg | NOTEST | 1,04812  | 2,04875 | 0,966938      | -0,959594     | 0,33726    | 1          | no  |
| AN9115 | ChrVI_A_nidulans_FGSC_A4:391261-392484 | WT_5hasex | WT_veg | NOTEST | 1,03853  | 1,76718 | 0,766911      | -0,627096     | 0,530596   | 1          | no  |
| AN9116 | ChrVI_A_nidulans_FGSC_A4:388956-390625 | WT_5hasex | WT_veg | OK     | 46,8247  | 49,46   | 0,0789919     | -0,151954     | 0,879223   | 0,953972   | no  |
| AN9117 | ChrVI_A_nidulans_FGSC_A4:386234-388647 | WT_5hasex | WT_veg | OK     | 5,76717  | 9,11608 | 0,66055       | -1,08999      | 0,275716   | 0,548835   | no  |
| AN9118 | ChrVI_A_nidulans_FGSC_A4:384893-385109 | WT_5hasex | WT_veg | OK     | 124,879  | 301,34  | 1,27087       | -2,10777      | 0,0350507  | 0,13669    | no  |
| AN9119 | ChrVI_A_nidulans_FGSC_A4:382345-384672 | WT_5hasex | WT_veg | OK     | 24,2305  | 41,957  | 0,792086      | -1,55684      | 0,119509   | 0,326815   | no  |
| AN9120 | ChrVI_A_nidulans_FGSC_A4:378040-381953 | WT_5hasex | WT_veg | OK     | 50,326   | 95,0899 | 0,917989      | -1,89305      | 0,0583515  | 0,198091   | no  |
| AN9122 | ChrVI_A_nidulans_FGSC_A4:373845-375018 | WT_5hasex | WT_veg | OK     | 2,48695  | 10,7723 | 2,11488       | -2,46482      | 0,0137082  | 0,0666796  | no  |
| AN9123 | ChrVI_A_nidulans_FGSC_A4:372394-372874 | WT_5hasex | WT_veg | OK     | 84,4895  | 274,982 | 1,70249       | -3,15758      | 0,00159086 | 0,0115388  | yes |
| AN9124 | ChrVI_A_nidulans_FGSC_A4:369756-371860 | WT_5hasex | WT_veg | OK     | 166,601  | 611,598 | 1,87619       | -3,67283      | 0,00023988 | 0,00232906 | yes |
| AN9125 | ChrVI_A_nidulans_FGSC_A4:368266-369600 | WT_5hasex | WT_veg | OK     | 15,708   | 96,9779 | 2,62616       | -4,63412      | 3,5845E-06 | 5,7512E-05 | yes |
| AN9126 | ChrVI_A_nidulans_FGSC_A4:366844-368053 | WT_5hasex | WT_veg | OK     | 16,9403  | 36,5231 | 1,10835       | -1,99388      | 0,0461657  | 0,167812   | no  |
| AN9127 | ChrVI_A_nidulans_FGSC_A4:364515-365469 | WT_5hasex | WT_veg | OK     | 1,87465  | 6,82412 | 1,86402       | -2,11161      | 0,0347196  | 0,135886   | no  |
| AN9128 | ChrVI_A_nidulans_FGSC_A4:362119-363272 | WT_5hasex | WT_veg | OK     | 7,17569  | 0       | -1.79769e+308 | -1.79769e+308 | 0,00943039 | 0,0497404  | yes |
| AN9129 | ChrVI_A_nidulans_FGSC_A4:357610-360977 | WT_5hasex | WT_veg | OK     | 3,79577  | 0       | -1.79769e+308 | -1.79769e+308 | 0,00501028 | 0,0297861  | yes |
| AN9130 | ChrVI_A_nidulans_FGSC_A4:353935-356122 | WT_5hasex | WT_veg | OK     | 9,94359  | 15,038  | 0,596774      | -1,02113      | 0,307193   | 0,583201   | no  |
| AN9131 | ChrVI_A_nidulans_FGSC_A4:351305-352588 | WT_5hasex | WT_veg | OK     | 23,4006  | 39,3111 | 0,748394      | -1,26937      | 0,204308   | 0,46044    | no  |
| AN9132 | ChrVI_A_nidulans_FGSC_A4:346396-351088 | WT_5hasex | WT_veg | OK     | 8,29081  | 19,6498 | 1,24493       | -2,5017       | 0,01236    | 0,0615685  | no  |
| AN9133 | ChrVI_A_nidulans_FGSC_A4:343950-345370 | WT_5hasex | WT_veg | OK     | 19,4928  | 28,7995 | 0,563105      | -0,997045     | 0,318743   | 0,594766   | no  |
| AN9137 | ChrVI_A_nidulans_FGSC_A4:332748-333452 | WT_5hasex | WT_veg | NOTEST | 1,79119  | 3,09081 | 0,787062      | -0,496776     | 0,619347   | 1          | no  |
| AN9138 | ChrVI_A_nidulans_FGSC_A4:330406-332464 | WT_5hasex | WT_veg | OK     | 88,2594  | 201,871 | 1,19361       | -2,29921      | 0,021493   | 0,0941072  | no  |
| AN9139 | ChrVI_A_nidulans_FGSC_A4:329230-330266 | WT_5hasex | WT_veg | OK     | 1,85417  | 6,15709 | 1,73148       | -1,57482      | 0,115298   | 0,318848   | no  |
| AN9140 | ChrVI_A_nidulans_FGSC_A4:326129-328282 | WT_5hasex | WT_veg | OK     | 17,8751  | 8,27394 | -1,11131      | 2,07718       | 0,037785   | 0,14459    | no  |
| AN9141 | ChrVI_A_nidulans_FGSC_A4:322063-325109 | WT_5hasex | WT_veg | OK     | 7,99821  | 5,94429 | -0,428173     | 0,623122      | 0,533204   | 0,771957   | no  |
| AN9142 | ChrVI_A_nidulans_FGSC_A4:319468-320455 | WT_5hasex | WT_veg | OK     | 38,3772  | 147,319 | 1,94062       | -3,18814      | 0,00143193 | 0,0105607  | yes |
| AN9145 | ChrVI_A_nidulans_FGSC_A4:311107-311589 | WT_5hasex | WT_veg | NOTEST | 1,51603  | 2,37973 | 0,650506      | -0,414489     | 0,678516   | 1          | no  |
| AN9146 | ChrVI_A_nidulans_FGSC_A4:305097-308600 | WT_5hasex | WT_veg | OK     | 21,4101  | 45,3726 | 1,08353       | -2,25765      | 0,0239673  | 0,102134   | no  |
| AN9147 | ChrVI_A_nidulans_FGSC_A4:298631-302068 | WT_5hasex | WT_veg | OK     | 15,8984  | 20,4736 | 0,364885      | -0,698497     | 0,484867   | 0,738952   | no  |
| AN9149 | ChrVI_A_nidulans_FGSC_A4:289215-294190 | WT_5hasex | WT_veg | OK     | 71,5114  | 174,442 | 1,2865        | -2,46397      | 0,013741   | 0,0668015  | no  |

## Supplementary table 1

|        |                                        |           |        |        |           |           |               |               |            |            |     |
|--------|----------------------------------------|-----------|--------|--------|-----------|-----------|---------------|---------------|------------|------------|-----|
| AN9151 | ChrVI_A_nidulans_FGSC_A4:275659-278925 | WT_5hasex | WT_veg | OK     | 13,0512   | 15,8096   | 0,276613      | -0,547628     | 0,583948   | 0,803595   | no  |
| AN9152 | ChrVI_A_nidulans_FGSC_A4:273903-275173 | WT_5hasex | WT_veg | OK     | 6,04664   | 12,5509   | 1,05358       | -1,52974      | 0,12608    | 0,338223   | no  |
| AN9154 | ChrVI_A_nidulans_FGSC_A4:264203-266359 | WT_5hasex | WT_veg | NOTEST | 1,12493   | 0         | -1.79769e+308 | -1.79769e+308 | 0,0239174  | 1          | no  |
| AN9156 | ChrVI_A_nidulans_FGSC_A4:252991-254901 | WT_5hasex | WT_veg | OK     | 37,9032   | 101,429   | 1,42008       | -2,42596      | 0,015268   | 0,0724902  | no  |
| AN9157 | ChrVI_A_nidulans_FGSC_A4:250495-252710 | WT_5hasex | WT_veg | OK     | 108,289   | 180,638   | 0,738213      | -1,50116      | 0,133315   | 0,351229   | no  |
| AN9158 | ChrVI_A_nidulans_FGSC_A4:248635-249391 | WT_5hasex | WT_veg | OK     | 8,42637   | 19,5103   | 1,21125       | -1,76754      | 0,077138   | 0,241526   | no  |
| AN9159 | ChrVI_A_nidulans_FGSC_A4:246569-247525 | WT_5hasex | WT_veg | OK     | 65,3553   | 131,471   | 1,00837       | -2,05454      | 0,039923   | 0,15064    | no  |
| AN9161 | ChrVI_A_nidulans_FGSC_A4:240182-241764 | WT_5hasex | WT_veg | OK     | 38,1094   | 107,767   | 1,49969       | -2,38464      | 0,017096   | 0,0791121  | no  |
| AN9162 | ChrVI_A_nidulans_FGSC_A4:238205-239816 | WT_5hasex | WT_veg | OK     | 3,65572   | 14,8446   | 2,02172       | -2,78428      | 0,0053646  | 0,0314423  | yes |
| AN9163 | ChrVI_A_nidulans_FGSC_A4:236244-237223 | WT_5hasex | WT_veg | OK     | 287,543   | 1333,04   | 2,21287       | -4,21836      | 2,4609E-05 | 0,00032046 | yes |
| AN9164 | ChrVI_A_nidulans_FGSC_A4:235012-236006 | WT_5hasex | WT_veg | NOTEST | 0         | 0         | 0             | 0             | 1          | 1          | no  |
| AN9165 | ChrVI_A_nidulans_FGSC_A4:231317-233453 | WT_5hasex | WT_veg | OK     | 20,1868   | 10,0534   | -1,00574      | 1,85587       | 0,0634718  | 0,210217   | no  |
| AN9166 | ChrVI_A_nidulans_FGSC_A4:227564-228803 | WT_5hasex | WT_veg | OK     | 2,26363   | 6,69126   | 1,56364       | -2,01399      | 0,0440104  | 0,161784   | no  |
| AN9167 | ChrVI_A_nidulans_FGSC_A4:226010-227087 | WT_5hasex | WT_veg | OK     | 10,1302   | 66,8099   | 7,2714        | -4,43396      | 9,2518E-06 | 0,00013434 | yes |
| AN9168 | ChrVI_A_nidulans_FGSC_A4:222681-224441 | WT_5hasex | WT_veg | OK     | 229,808   | 156,698   | -0,552443     | 0,967068      | 0,33351    | 0,609876   | no  |
| AN9169 | ChrVI_A_nidulans_FGSC_A4:214599-216386 | WT_5hasex | WT_veg | NOTEST | 0,134067  | 0,52919   | 1,98083       | -0,833259     | 0,404699   | 1          | no  |
| AN9171 | ChrVI_A_nidulans_FGSC_A4:208955-210265 | WT_5hasex | WT_veg | NOTEST | 0,194916  | 0,149745  | -0,380348     | 0,109471      | 0,912829   | 1          | no  |
| AN9172 | ChrVI_A_nidulans_FGSC_A4:206388-208193 | WT_5hasex | WT_veg | OK     | 9,57305   | 4,66783   | -1,03623      | 1,49317       | 0,135393   | 0,354706   | no  |
| AN9173 | ChrVI_A_nidulans_FGSC_A4:204369-206139 | WT_5hasex | WT_veg | OK     | 21,4385   | 43,1117   | 1,00788       | -1,74235      | 0,0814479  | 0,25081    | no  |
| AN9174 | ChrVI_A_nidulans_FGSC_A4:199583-201347 | WT_5hasex | WT_veg | OK     | 3,87218   | 0,712199  | -2,44279      | 1,81428       | 0,0696347  | 0,224637   | no  |
| AN9177 | ChrVI_A_nidulans_FGSC_A4:189171-190473 | WT_5hasex | WT_veg | OK     | 75,5804   | 72,4737   | -0,0605549    | 0,0941082     | 0,925023   | 0,971594   | no  |
| AN9178 | ChrVI_A_nidulans_FGSC_A4:184385-188744 | WT_5hasex | WT_veg | OK     | 34,2662   | 33,7304   | -0,0227351    | 0,0346452     | 0,972363   | 0,990021   | no  |
| AN9179 | ChrVI_A_nidulans_FGSC_A4:181029-182130 | WT_5hasex | WT_veg | OK     | 24,5531   | 95,7197   | 1,96291       | -3,39886      | 0,00067666 | 0,00562744 | yes |
| AN9180 | ChrVI_A_nidulans_FGSC_A4:178807-180745 | WT_5hasex | WT_veg | OK     | 129       | 818,859   | 2,66625       | -4,77272      | 1,8176E-06 | 3,1506E-05 | yes |
| AN9181 | ChrVI_A_nidulans_FGSC_A4:177449-178498 | WT_5hasex | WT_veg | OK     | 4,43597   | 3,41366   | -0,377931     | 0,44316       | 0,65765    | 0,845678   | no  |
| AN9184 | ChrVI_A_nidulans_FGSC_A4:168293-170253 | WT_5hasex | WT_veg | OK     | 74,4459   | 46,9426   | -0,665294     | 1,09317       | 0,274319   | 0,54703    | no  |
| AN9185 | ChrVI_A_nidulans_FGSC_A4:166688-167294 | WT_5hasex | WT_veg | OK     | 7,22644   | 32,142    | 2,15311       | -2,83277      | 0,00461469 | 0,0278914  | yes |
| AN9186 | ChrVI_A_nidulans_FGSC_A4:164092-166004 | WT_5hasex | WT_veg | OK     | 68,7214   | 379,829   | 2,46652       | -3,9747       | 7,0467E-05 | 0,00080855 | yes |
| AN9187 | ChrVI_A_nidulans_FGSC_A4:161607-163851 | WT_5hasex | WT_veg | OK     | 1,99047   | 3,76296   | 0,91876       | -1,26911      | 0,204402   | 0,460593   | no  |
| AN9188 | ChrVI_A_nidulans_FGSC_A4:160086-160946 | WT_5hasex | WT_veg | NOTEST | 0         | 0         | 0             | 0             | 1          | 1          | no  |
| AN9189 | ChrVI_A_nidulans_FGSC_A4:158461-159843 | WT_5hasex | WT_veg | NOTEST | 0,378661  | 0         | -1.79769e+308 | -1.79769e+308 | 0,0703913  | 1          | no  |
| AN9191 | ChrVI_A_nidulans_FGSC_A4:154949-156549 | WT_5hasex | WT_veg | OK     | 34,3917   | 127,287   | 1,88795       | -3,81703      | 0,00013507 | 0,00142584 | yes |
| AN9192 | ChrVI_A_nidulans_FGSC_A4:153304-154774 | WT_5hasex | WT_veg | OK     | 28,5478   | 115,683   | 2,01873       | -3,91386      | 9,0832E-05 | 0,00100949 | yes |
| AN9193 | ChrVI_A_nidulans_FGSC_A4:151292-152312 | WT_5hasex | WT_veg | OK     | 39,3716   | 40,3651   | 0,0359546     | -0,0614916    | 0,950968   | 0,981964   | no  |
| AN9195 | ChrVI_A_nidulans_FGSC_A4:145846-146917 | WT_5hasex | WT_veg | OK     | 0,908052  | 10,363    | 3,51252       | -3,91746      | 8,9487E-05 | 0,00099666 | yes |
| AN9196 | ChrVI_A_nidulans_FGSC_A4:142868-144131 | WT_5hasex | WT_veg | NOTEST | 0,328731  | 0,686543  | 1,06244       | -0,613992     | 0,53922    | 1          | no  |
| AN9197 | ChrVI_A_nidulans_FGSC_A4:140197-141723 | WT_5hasex | WT_veg | NOTEST | 1,04805   | 2,27672   | 1,11925       | -1,19222      | 0,233176   | 1          | no  |
| AN9198 | ChrVI_A_nidulans_FGSC_A4:137878-139465 | WT_5hasex | WT_veg | NOTEST | 0,614231  | 1,2607    | 1,03737       | -0,938552     | 0,347961   | 1          | no  |
| AN9200 | ChrVI_A_nidulans_FGSC_A4:123220-132751 | WT_5hasex | WT_veg | NOTEST | 0,0468736 | 0,0828927 | 0,82247       | -0,482372     | 0,629541   | 1          | no  |
| AN9201 | ChrVI_A_nidulans_FGSC_A4:121419-121820 | WT_5hasex | WT_veg | NOTEST | 0         | 0         | 0             | 0             | 1          | 1          | no  |
| AN9202 | ChrVI_A_nidulans_FGSC_A4:119582-120239 | WT_5hasex | WT_veg | NOTEST | 1,28487   | 0         | -1.79769e+308 | -1.79769e+308 | 0,0793015  | 1          | no  |
| AN9203 | ChrVI_A_nidulans_FGSC_A4:114794-116576 | WT_5hasex | WT_veg | NOTEST | 1,08256   | 1,93639   | 0,838921      | -0,94784      | 0,343211   | 1          | no  |
| AN9204 | ChrVI_A_nidulans_FGSC_A4:111671-112265 | WT_5hasex | WT_veg | OK     | 12,1117   | 70,0636   | 2,53226       | -3,52923      | 0,00041677 | 0,00372178 | yes |
| AN9205 | ChrVI_A_nidulans_FGSC_A4:109499-110381 | WT_5hasex | WT_veg | OK     | 23,1735   | 22,1294   | -0,0665075    | 0,112254      | 0,910622   | 0,966156   | no  |
| AN9206 | ChrVI_A_nidulans_FGSC_A4:107408-108337 | WT_5hasex | WT_veg | OK     | 47,4845   | 68,1013   | 0,520226      | -1,00866      | 0,313136   | 0,589193   | no  |
| AN9207 | ChrVI_A_nidulans_FGSC_A4:105697-106729 | WT_5hasex | WT_veg | OK     | 7,76699   | 0         | -1.79769e+308 | -1.79769e+308 | 0,00948601 | 0,0499734  | yes |
| AN9208 | ChrVI_A_nidulans_FGSC_A4:102977-103919 | WT_5hasex | WT_veg | NOTEST | 0,504376  | 0         | -1.79769e+308 | -1.79769e+308 | 0,133588   | 1          | no  |
| AN9209 | ChrVI_A_nidulans_FGSC_A4:100969-101807 | WT_5hasex | WT_veg | NOTEST | 0,272728  | 0,512203  | 0,909256      | -0,364756     | 0,715294   | 1          | no  |
| AN9211 | ChrVI_A_nidulans_FGSC_A4:95153-96362   | WT_5hasex | WT_veg | OK     | 32,2976   | 83,7683   | 1,37498       | -2,58555      | 0,00972242 | 0,0509271  | no  |
| AN9212 | ChrVI_A_nidulans_FGSC_A4:89155-89458   | WT_5hasex | WT_veg | OK     | 0         | 6,57452   | 1.79769e+308  | 1.79769e+308  | 0,036343   | 0,140531   | no  |
| AN9213 | ChrVI_A_nidulans_FGSC_A4:85182-87901   | WT_5hasex | WT_veg | OK     | 2,6659    | 0         | -1.79769e+308 | -1.79769e+308 | 0,00856841 | 0,046094   | yes |
| AN9215 | ChrVI_A_nidulans_FGSC_A4:77877-78612   | WT_5hasex | WT_veg | NOTEST | 0         | 0         | 0             | 0             | 1          | 1          | no  |
| AN9216 | ChrVI_A_nidulans_FGSC_A4:74667-76371   | WT_5hasex | WT_veg | NOTEST | 0,186629  | 0,947823  | 2,34445       | -1,51549      | 0,129649   | 1          | no  |

# Supplementary table 1

|        |                                          |           |        |        |          |           |               |               |            |            |     |
|--------|------------------------------------------|-----------|--------|--------|----------|-----------|---------------|---------------|------------|------------|-----|
| AN9219 | ChrVI_A_nidulans_FGSC_A4:59184-60925     | WT_5hasex | WT_veg | NOTEST | 1,76723  | 0         | -1.79769e+308 | -1.79769e+308 | 0,04748    | 1          | no  |
| AN9220 | ChrVI_A_nidulans_FGSC_A4:56952-58512     | WT_5hasex | WT_veg | NOTEST | 1,67925  | 1,35156   | -0,313193     | 0,259295      | 0,795408   | 1          | no  |
| AN9221 | ChrVI_A_nidulans_FGSC_A4:51943-55300     | WT_5hasex | WT_veg | OK     | 17,6649  | 23,2952   | 0,399147      | -0,784894     | 0,432516   | 0,698721   | no  |
| AN9223 | ChrVI_A_nidulans_FGSC_A4:43595-44582     | WT_5hasex | WT_veg | NOTEST | 0        | 0         | 0             | 0             | 1          | 1          | no  |
| AN9224 | ChrVI_A_nidulans_FGSC_A4:40426-41860     | WT_5hasex | WT_veg | NOTEST | 0        | 0,448314  | 1.79769e+308  | 1.79769e+308  | 0,134707   | 1          | no  |
| AN9226 | ChrVI_A_nidulans_FGSC_A4:29166-37503     | WT_5hasex | WT_veg | NOTEST | 0,334157 | 0,0943214 | -1,82487      | 1,23681       | 0,216158   | 1          | no  |
| AN9227 | ChrVI_A_nidulans_FGSC_A4:27684-28611     | WT_5hasex | WT_veg | NOTEST | 0        | 0,193318  | 1.79769e+308  | 1.79769e+308  | 0,309884   | 1          | no  |
| AN9230 | ChrVI_A_nidulans_FGSC_A4:14406-16586     | WT_5hasex | WT_veg | NOTEST | 0        | 0         | 0             | 0             | 1          | 1          | no  |
| AN9231 | ChrVI_A_nidulans_FGSC_A4:12114-13997     | WT_5hasex | WT_veg | NOTEST | 0,134339 | 0         | -1.79769e+308 | -1.79769e+308 | 0,224063   | 1          | no  |
| AN9232 | ChrVI_A_nidulans_FGSC_A4:10633-11449     | WT_5hasex | WT_veg | NOTEST | 0        | 0         | 0             | 0             | 1          | 1          | no  |
| AN9233 | ChrVI_A_nidulans_FGSC_A4:8799-10071      | WT_5hasex | WT_veg | NOTEST | 0        | 0         | 0             | 0             | 1          | 1          | no  |
| AN9234 | ChrVI_A_nidulans_FGSC_A4:5378-6480       | WT_5hasex | WT_veg | NOTEST | 0,63105  | 0,170094  | -1,89142      | 0,609792      | 0,542      | 1          | no  |
| AN9235 | ChrVI_A_nidulans_FGSC_A4:3692-4756       | WT_5hasex | WT_veg | NOTEST | 0,289382 | 0         | -1.79769e+308 | -1.79769e+308 | 0,165569   | 1          | no  |
| AN9236 | ChrVI_A_nidulans_FGSC_A4:1048-2798       | WT_5hasex | WT_veg | NOTEST | 0,145588 | 0         | -1.79769e+308 | -1.79769e+308 | 0,224063   | 1          | no  |
| AN9239 | ChrVIII_A_nidulans_FGSC_A4:12909-13963   | WT_5hasex | WT_veg | NOTEST | 0,74933  | 0,276117  | -1,44032      | 0,603761      | 0,546002   | 1          | no  |
| AN9240 | ChrVIII_A_nidulans_FGSC_A4:14516-15575   | WT_5hasex | WT_veg | OK     | 20,7679  | 4,21626   | -2,30032      | 2,65316       | 0,00797414 | 0,0434593  | yes |
| AN9241 | ChrVIII_A_nidulans_FGSC_A4:25775-27594   | WT_5hasex | WT_veg | OK     | 4,08726  | 5,57384   | 0,447538      | -0,629017     | 0,529338   | 0,769036   | no  |
| AN9242 | ChrVIII_A_nidulans_FGSC_A4:27767-29723   | WT_5hasex | WT_veg | NOTEST | 1,05159  | 2,19647   | 1,06261       | -1,19383      | 0,232544   | 1          | no  |
| AN9243 | ChrVIII_A_nidulans_FGSC_A4:39129-42783   | WT_5hasex | WT_veg | NOTEST | 0,302948 | 1,09267   | 1,85071       | -1,67313      | 0,0943016  | 1          | no  |
| AN9244 | ChrVIII_A_nidulans_FGSC_A4:43422-50358   | WT_5hasex | WT_veg | NOTEST | 0,127532 | 0,36678   | 1,52405       | -1,48372      | 0,137884   | 1          | no  |
| AN9245 | ChrVIII_A_nidulans_FGSC_A4:51864-53997   | WT_5hasex | WT_veg | NOTEST | 0        | 0         | 0             | 0             | 1          | 1          | no  |
| AN9246 | ChrVIII_A_nidulans_FGSC_A4:54324-55221   | WT_5hasex | WT_veg | NOTEST | 1,33186  | 0         | -1.79769e+308 | -1.79769e+308 | 0,0368957  | 1          | no  |
| AN9247 | ChrVIII_A_nidulans_FGSC_A4:55686-56163   | WT_5hasex | WT_veg | OK     | 2,75095  | 0         | -1.79769e+308 | -1.79769e+308 | 0,0315813  | 0,126279   | no  |
| AN9249 | ChrVIII_A_nidulans_FGSC_A4:59582-60345   | WT_5hasex | WT_veg | NOTEST | 2,04104  | 2,92547   | 0,519365      | -0,452015     | 0,651258   | 1          | no  |
| AN9250 | ChrVIII_A_nidulans_FGSC_A4:61262-62813   | WT_5hasex | WT_veg | NOTEST | 0,559519 | 0,911769  | 0,704483      | -0,600104     | 0,548437   | 1          | no  |
| AN9252 | ChrVIII_A_nidulans_FGSC_A4:65120-65624   | WT_5hasex | WT_veg | NOTEST | 1,30487  | 0         | -1.79769e+308 | -1.79769e+308 | 0,0537957  | 1          | no  |
| AN9254 | ChrVIII_A_nidulans_FGSC_A4:69468-70138   | WT_5hasex | WT_veg | NOTEST | 0        | 0         | 0             | 0             | 1          | 1          | no  |
| AN9256 | ChrVIII_A_nidulans_FGSC_A4:78517-79088   | WT_5hasex | WT_veg | NOTEST | 0,41913  | 0         | -1.79769e+308 | -1.79769e+308 | 0,165569   | 1          | no  |
| AN9257 | ChrVIII_A_nidulans_FGSC_A4:81052-81800   | WT_5hasex | WT_veg | NOTEST | 0,443418 | 0         | -1.79769e+308 | -1.79769e+308 | 0,224063   | 1          | no  |
| AN9259 | ChrVIII_A_nidulans_FGSC_A4:87088-88213   | WT_5hasex | WT_veg | NOTEST | 0,267312 | 0         | -1.79769e+308 | -1.79769e+308 | 0,224063   | 1          | no  |
| AN9260 | ChrVIII_A_nidulans_FGSC_A4:91585-94567   | WT_5hasex | WT_veg | NOTEST | 0        | 0         | 0             | 0             | 1          | 1          | no  |
| AN9261 | ChrVIII_A_nidulans_FGSC_A4:95973-98536   | WT_5hasex | WT_veg | NOTEST | 0        | 0         | 0             | 0             | 1          | 1          | no  |
| AN9262 | ChrVIII_A_nidulans_FGSC_A4:98952-101493  | WT_5hasex | WT_veg | OK     | 2,22316  | 12,7087   | 2,51513       | -3,52837      | 0,00041813 | 0,00373267 | yes |
| AN9263 | ChrVIII_A_nidulans_FGSC_A4:106746-108314 | WT_5hasex | WT_veg | OK     | 216,151  | 106,457   | -1,02176      | 1,9932        | 0,0462396  | 0,167999   | no  |
| AN9264 | ChrVIII_A_nidulans_FGSC_A4:111434-112289 | WT_5hasex | WT_veg | OK     | 2,78015  | 12,8822   | 2,21214       | -2,37134      | 0,0177237  | 0,0812022  | no  |
| AN9265 | ChrVIII_A_nidulans_FGSC_A4:113099-114503 | WT_5hasex | WT_veg | OK     | 9,22828  | 0,724873  | -3,67026      | 3,12207       | 0,00179582 | 0,0127582  | yes |
| AN9266 | ChrVIII_A_nidulans_FGSC_A4:115038-116413 | WT_5hasex | WT_veg | OK     | 3,04751  | 0         | -1.79769e+308 | -1.79769e+308 | 0,0347525  | 0,135954   | no  |
| AN9267 | ChrVIII_A_nidulans_FGSC_A4:119914-121030 | WT_5hasex | WT_veg | NOTEST | 0,158622 | 0         | -1.79769e+308 | -1.79769e+308 | 0,165569   | 1          | no  |
| AN9268 | ChrVIII_A_nidulans_FGSC_A4:121293-122229 | WT_5hasex | WT_veg | NOTEST | 0        | 0         | 0             | 0             | 1          | 1          | no  |
| AN9272 | ChrVIII_A_nidulans_FGSC_A4:140702-142664 | WT_5hasex | WT_veg | NOTEST | 0        | 0         | 0             | 0             | 1          | 1          | no  |
| AN9273 | ChrVIII_A_nidulans_FGSC_A4:143365-144005 | WT_5hasex | WT_veg | OK     | 9,54017  | 8,06609   | -0,242147     | 0,242399      | 0,808471   | 0,923277   | no  |
| AN9274 | ChrVIII_A_nidulans_FGSC_A4:146402-147169 | WT_5hasex | WT_veg | OK     | 2,61663  | 10,0513   | 1,9416        | -2,31723      | 0,0204912  | 0,0908445  | no  |
| AN9275 | ChrVIII_A_nidulans_FGSC_A4:148190-148970 | WT_5hasex | WT_veg | NOTEST | 0        | 0         | 0             | 0             | 1          | 1          | no  |
| AN9277 | ChrVIII_A_nidulans_FGSC_A4:156847-158667 | WT_5hasex | WT_veg | NOTEST | 0        | 0         | 0             | 0             | 1          | 1          | no  |
| AN9278 | ChrVIII_A_nidulans_FGSC_A4:158881-160610 | WT_5hasex | WT_veg | NOTEST | 0,103932 | 0         | -1.79769e+308 | -1.79769e+308 | 0,165569   | 1          | no  |
| AN9279 | ChrVIII_A_nidulans_FGSC_A4:160809-161724 | WT_5hasex | WT_veg | NOTEST | 0        | 0         | 0             | 0             | 1          | 1          | no  |
| AN9280 | ChrVIII_A_nidulans_FGSC_A4:162753-164482 | WT_5hasex | WT_veg | NOTEST | 0,157086 | 0         | -1.79769e+308 | -1.79769e+308 | 0,224063   | 1          | no  |
| AN9281 | ChrVIII_A_nidulans_FGSC_A4:164835-165538 | WT_5hasex | WT_veg | NOTEST | 0        | 0         | 0             | 0             | 1          | 1          | no  |
| AN9282 | ChrVIII_A_nidulans_FGSC_A4:165901-167878 | WT_5hasex | WT_veg | NOTEST | 0        | 0         | 0             | 0             | 1          | 1          | no  |
| AN9283 | ChrVIII_A_nidulans_FGSC_A4:170523-172823 | WT_5hasex | WT_veg | NOTEST | 0        | 0         | 0             | 0             | 1          | 1          | no  |
| AN9284 | ChrVIII_A_nidulans_FGSC_A4:173142-173957 | WT_5hasex | WT_veg | OK     | 2,58711  | 23,6289   | 3,19114       | -3,91229      | 9,1424E-05 | 0,00101543 | yes |
| AN9285 | ChrVIII_A_nidulans_FGSC_A4:174086-174641 | WT_5hasex | WT_veg | OK     | 5284,79  | 28493,6   | 2,43072       | -2,8656       | 0,00416226 | 0,0256299  | yes |
| AN9287 | ChrVIII_A_nidulans_FGSC_A4:178169-179617 | WT_5hasex | WT_veg | NOTEST | 1,98092  | 1,69591   | -0,224112     | 0,235411      | 0,81389    | 1          | no  |

## Supplementary table 1

|        |                                          |           |        |        |          |          |               |               |            |            |     |
|--------|------------------------------------------|-----------|--------|--------|----------|----------|---------------|---------------|------------|------------|-----|
| AN9288 | ChrVIII_A_nidulans_FGSC_A4:180565-181833 | WT_5hasex | WT_veg | OK     | 5,28782  | 24,1041  | 2,18853       | -2,84067      | 0,00450191 | 0,0273581  | yes |
| AN9289 | ChrVIII_A_nidulans_FGSC_A4:181969-183817 | WT_5hasex | WT_veg | OK     | 10,61    | 11,4867  | 0,114537      | -0,180212     | 0,856986   | 0,944276   | no  |
| AN9290 | ChrVIII_A_nidulans_FGSC_A4:185505-186072 | WT_5hasex | WT_veg | NOTEST | 0        | 0        | 0             | 0             | 1          | 1          | no  |
| AN9292 | ChrVIII_A_nidulans_FGSC_A4:193497-194731 | WT_5hasex | WT_veg | OK     | 4,89437  | 9,90677  | 1,01729       | -1,44222      | 0,14924    | 0,377764   | no  |
| AN9293 | ChrVIII_A_nidulans_FGSC_A4:195165-197081 | WT_5hasex | WT_veg | OK     | 6,55542  | 22,2201  | 1,76111       | -2,83962      | 0,00451671 | 0,0274321  | yes |
| AN9294 | ChrVIII_A_nidulans_FGSC_A4:197910-199597 | WT_5hasex | WT_veg | OK     | 15,2625  | 53,206   | 1,8016        | -3,09328      | 0,00197959 | 0,0138645  | yes |
| AN9295 | ChrVIII_A_nidulans_FGSC_A4:202662-204420 | WT_5hasex | WT_veg | OK     | 1,31339  | 8,20924  | 2,64395       | -3,01083      | 0,00260534 | 0,0173806  | yes |
| AN9297 | ChrVIII_A_nidulans_FGSC_A4:210659-212726 | WT_5hasex | WT_veg | OK     | 334,428  | 100,034  | -1,74121      | 3,26024       | 0,00111318 | 0,00858343 | yes |
| AN9299 | ChrVIII_A_nidulans_FGSC_A4:217339-218176 | WT_5hasex | WT_veg | NOTEST | 1,11506  | 1,19906  | 0,104783      | -0,0686436    | 0,945273   | 1          | no  |
| AN9300 | ChrVIII_A_nidulans_FGSC_A4:220918-223124 | WT_5hasex | WT_veg | OK     | 6,35617  | 17,7002  | 1,47753       | -2,18218      | 0,0290959  | 0,118459   | no  |
| AN9302 | ChrVIII_A_nidulans_FGSC_A4:225489-228452 | WT_5hasex | WT_veg | OK     | 4,48439  | 14,9879  | 1,74082       | -2,28867      | 0,0220986  | 0,0960288  | no  |
| AN9303 | ChrVIII_A_nidulans_FGSC_A4:229088-230217 | WT_5hasex | WT_veg | OK     | 75,9281  | 381,375  | 2,3285        | -4,71669      | 2,3972E-06 | 4,0262E-05 | yes |
| AN9305 | ChrVIII_A_nidulans_FGSC_A4:233259-234892 | WT_5hasex | WT_veg | OK     | 42,1888  | 43,917   | 0,0579209     | -0,107418     | 0,914457   | 0,967462   | no  |
| AN9306 | ChrVIII_A_nidulans_FGSC_A4:235545-236903 | WT_5hasex | WT_veg | OK     | 39,9312  | 72,4711  | 0,859889      | -1,56805      | 0,11687    | 0,321831   | no  |
| AN9307 | ChrVIII_A_nidulans_FGSC_A4:237697-238357 | WT_5hasex | WT_veg | NOTEST | 1,07926  | 2,6165   | 1,2776        | -1,11901      | 0,263138   | 1          | no  |
| AN9308 | ChrVIII_A_nidulans_FGSC_A4:238642-240301 | WT_5hasex | WT_veg | OK     | 54,4583  | 128,722  | 1,24104       | -2,55813      | 0,0105237  | 0,054214   | no  |
| AN9309 | ChrVIII_A_nidulans_FGSC_A4:240472-241976 | WT_5hasex | WT_veg | NOTEST | 0,6256   | 2,24056  | 1,84055       | -1,86975      | 0,0615186  | 1          | no  |
| AN9310 | ChrVIII_A_nidulans_FGSC_A4:243745-244298 | WT_5hasex | WT_veg | OK     | 1,87446  | 19,6528  | 3,39019       | -3,30094      | 0,00096362 | 0,00761275 | yes |
| AN9311 | ChrVIII_A_nidulans_FGSC_A4:245539-246352 | WT_5hasex | WT_veg | OK     | 4,73149  | 1,57295  | -1,58882      | 1,3982        | 0,162052   | 0,398197   | no  |
| AN9314 | ChrVIII_A_nidulans_FGSC_A4:252332-255341 | WT_5hasex | WT_veg | NOTEST | 0,227169 | 0        | -1.79769e+308 | -1.79769e+308 | 0,0537957  | 1          | no  |
| AN9315 | ChrVIII_A_nidulans_FGSC_A4:256320-257609 | WT_5hasex | WT_veg | OK     | 5,81654  | 4,98368  | -0,222949     | 0,306948      | 0,758883   | 0,900238   | no  |
| AN9316 | ChrVIII_A_nidulans_FGSC_A4:257949-260202 | WT_5hasex | WT_veg | NOTEST | 1,25371  | 0,341591 | -1,87586      | 1,25245       | 0,210408   | 1          | no  |
| AN9317 | ChrVIII_A_nidulans_FGSC_A4:261325-264360 | WT_5hasex | WT_veg | NOTEST | 0,356016 | 0        | -1.79769e+308 | -1.79769e+308 | 0,0537957  | 1          | no  |
| AN9318 | ChrVIII_A_nidulans_FGSC_A4:265300-267372 | WT_5hasex | WT_veg | NOTEST | 1,83492  | 1,00883  | -0,86303      | 0,816573      | 0,414173   | 1          | no  |
| AN9319 | ChrVIII_A_nidulans_FGSC_A4:268544-269267 | WT_5hasex | WT_veg | NOTEST | 0        | 0        | 0             | 0             | 1          | 1          | no  |
| AN9320 | ChrVIII_A_nidulans_FGSC_A4:269514-272723 | WT_5hasex | WT_veg | OK     | 16,2086  | 31,6409  | 0,965037      | -1,8358       | 0,0663875  | 0,217075   | no  |
| AN9321 | ChrVIII_A_nidulans_FGSC_A4:273183-275139 | WT_5hasex | WT_veg | NOTEST | 0        | 0        | 0             | 0             | 1          | 1          | no  |
| AN9322 | ChrVIII_A_nidulans_FGSC_A4:276287-277306 | WT_5hasex | WT_veg | OK     | 36,897   | 91,2897  | 1,30695       | -2,48986      | 0,0127793  | 0,0632294  | no  |
| AN9323 | ChrVIII_A_nidulans_FGSC_A4:277994-281510 | WT_5hasex | WT_veg | OK     | 2,92446  | 4,82094  | 0,721142      | -0,974638     | 0,32974    | 0,606151   | no  |
| AN9324 | ChrVIII_A_nidulans_FGSC_A4:282341-284081 | WT_5hasex | WT_veg | OK     | 2,35321  | 1,43223  | -0,716361     | 0,772148      | 0,440027   | 0,704177   | no  |
| AN9325 | ChrVIII_A_nidulans_FGSC_A4:290457-291115 | WT_5hasex | WT_veg | OK     | 5,54919  | 20,1123  | 1,85773       | -2,36911      | 0,0178309  | 0,0815763  | no  |
| AN9327 | ChrVIII_A_nidulans_FGSC_A4:295564-296631 | WT_5hasex | WT_veg | OK     | 19,6303  | 42,7121  | 1,12157       | -1,80424      | 0,0711936  | 0,228233   | no  |
| AN9328 | ChrVIII_A_nidulans_FGSC_A4:297348-299416 | WT_5hasex | WT_veg | OK     | 3,55868  | 4,24431  | 0,254186      | -0,368988     | 0,712136   | 0,876311   | no  |
| AN9329 | ChrVIII_A_nidulans_FGSC_A4:300463-303670 | WT_5hasex | WT_veg | NOTEST | 0        | 0        | 0             | 0             | 1          | 1          | no  |
| AN9330 | ChrVIII_A_nidulans_FGSC_A4:305044-306049 | WT_5hasex | WT_veg | NOTEST | 1,77701  | 1,89415  | 0,0920929     | -0,0881657    | 0,929745   | 1          | no  |
| AN9331 | ChrVIII_A_nidulans_FGSC_A4:306798-307897 | WT_5hasex | WT_veg | NOTEST | 0,310624 | 1,24525  | 2,0032        | -0,881173     | 0,378224   | 1          | no  |
| AN9332 | ChrVIII_A_nidulans_FGSC_A4:308461-309436 | WT_5hasex | WT_veg | NOTEST | 0,910908 | 3,45596  | 1,92371       | -1,91414      | 0,0556027  | 1          | no  |
| AN9336 | ChrVIII_A_nidulans_FGSC_A4:322535-324188 | WT_5hasex | WT_veg | NOTEST | 0        | 0        | 0             | 0             | 1          | 1          | no  |
| AN9337 | ChrVIII_A_nidulans_FGSC_A4:324813-326067 | WT_5hasex | WT_veg | NOTEST | 0        | 0        | 0             | 0             | 1          | 1          | no  |
| AN9338 | ChrVIII_A_nidulans_FGSC_A4:327353-327811 | WT_5hasex | WT_veg | OK     | 8,48786  | 11,1223  | 0,389984      | -0,44163      | 0,658757   | 0,846178   | no  |
| AN9341 | ChrVIII_A_nidulans_FGSC_A4:341992-345694 | WT_5hasex | WT_veg | NOTEST | 0,346702 | 1,67652  | 2,2737        | -2,54715      | 0,0108606  | 1          | no  |
| AN9342 | ChrVIII_A_nidulans_FGSC_A4:349617-354139 | WT_5hasex | WT_veg | OK     | 6,15871  | 32,3456  | 2,39287       | -4,42156      | 9,7989E-06 | 0,00014153 | yes |
| AN9343 | ChrVIII_A_nidulans_FGSC_A4:355966-356815 | WT_5hasex | WT_veg | OK     | 0        | 4,96031  | 1.79769e+308  | 1.79769e+308  | 0,00124263 | 0,00938545 | yes |
| AN9344 | ChrVIII_A_nidulans_FGSC_A4:358005-363003 | WT_5hasex | WT_veg | NOTEST | 0        | 0        | 0             | 0             | 1          | 1          | no  |
| AN9345 | ChrVIII_A_nidulans_FGSC_A4:364541-365794 | WT_5hasex | WT_veg | NOTEST | 0,3424   | 0        | -1.79769e+308 | -1.79769e+308 | 0,133588   | 1          | no  |
| AN9346 | ChrVIII_A_nidulans_FGSC_A4:366134-367826 | WT_5hasex | WT_veg | NOTEST | 1,07312  | 2,85009  | 1,40919       | -1,56068      | 0,1186     | 1          | no  |
| AN9347 | ChrVIII_A_nidulans_FGSC_A4:368785-369727 | WT_5hasex | WT_veg | NOTEST | 1,61846  | 0,222975 | -2,85966      | 0,947674      | 0,343296   | 1          | no  |
| AN9348 | ChrVIII_A_nidulans_FGSC_A4:373276-375586 | WT_5hasex | WT_veg | OK     | 2,6858   | 1,55159  | -0,791608     | 0,965125      | 0,334482   | 0,61084    | no  |
| AN9349 | ChrVIII_A_nidulans_FGSC_A4:378403-379766 | WT_5hasex | WT_veg | NOTEST | 0        | 0        | 0             | 0             | 1          | 1          | no  |
| AN9350 | ChrVIII_A_nidulans_FGSC_A4:386733-387777 | WT_5hasex | WT_veg | OK     | 1,42013  | 8,82223  | 2,63512       | -2,57138      | 0,0101295  | 0,0526333  | no  |
| AN9351 | ChrVIII_A_nidulans_FGSC_A4:388290-389058 | WT_5hasex | WT_veg | OK     | 7,81725  | 53,6534  | 2,77894       | -3,18073      | 0,00146903 | 0,0107981  | yes |
| AN9352 | ChrVIII_A_nidulans_FGSC_A4:389785-391812 | WT_5hasex | WT_veg | NOTEST | 0,814396 | 0,625136 | -0,381561     | 0,256794      | 0,797338   | 1          | no  |
| AN9353 | ChrVIII_A_nidulans_FGSC_A4:392276-392676 | WT_5hasex | WT_veg | NOTEST | 0,679162 | 0        | -1.79769e+308 | -1.79769e+308 | 0,165569   | 1          | no  |



## Supplementary table 1

|        |                                          |           |        |        |          |          |               |               |            |            |     |
|--------|------------------------------------------|-----------|--------|--------|----------|----------|---------------|---------------|------------|------------|-----|
| AN9354 | ChrVIII_A_nidulans_FGSC_A4:393159-394137 | WT_5hasex | WT_veg | NOTEST | 1,7203   | 1,55367  | -0,146985     | 0,122766      | 0,902292   | 1          | no  |
| AN9355 | ChrVIII_A_nidulans_FGSC_A4:394321-395249 | WT_5hasex | WT_veg | OK     | 5,23789  | 2,2326   | -1,23026      | 1,26946       | 0,204276   | 0,460427   | no  |
| AN9356 | ChrVIII_A_nidulans_FGSC_A4:395673-397034 | WT_5hasex | WT_veg | OK     | 13,4284  | 23,1356  | 0,784825      | -1,36924      | 0,170924   | 0,123254   | no  |
| AN9357 | ChrVIII_A_nidulans_FGSC_A4:398177-399086 | WT_5hasex | WT_veg | OK     | 85,352   | 255,928  | 1,58424       | -3,24416      | 0,00117796 | 0,00898902 | yes |
| AN9358 | ChrVIII_A_nidulans_FGSC_A4:399747-400610 | WT_5hasex | WT_veg | OK     | 89,7802  | 198,076  | 1,14159       | -2,33381      | 0,0196058  | 0,0877581  | no  |
| AN9359 | ChrVIII_A_nidulans_FGSC_A4:400973-403297 | WT_5hasex | WT_veg | OK     | 30,6626  | 52,5176  | 0,776322      | -1,59493      | 0,110728   | 0,310654   | no  |
| AN9360 | ChrVIII_A_nidulans_FGSC_A4:403492-404686 | WT_5hasex | WT_veg | OK     | 19,4507  | 52,6646  | 1,43701       | -2,57635      | 0,00998486 | 0,0520624  | no  |
| AN9361 | ChrVIII_A_nidulans_FGSC_A4:405514-407375 | WT_5hasex | WT_veg | OK     | 7,95382  | 46,5207  | 2,54815       | -4,18168      | 2,8937E-05 | 0,00037189 | yes |
| AN9362 | ChrVIII_A_nidulans_FGSC_A4:408941-409863 | WT_5hasex | WT_veg | OK     | 184,135  | 432,172  | 1,23084       | -2,4249       | 0,0153126  | 0,0726294  | no  |
| AN9363 | ChrVIII_A_nidulans_FGSC_A4:411400-412751 | WT_5hasex | WT_veg | OK     | 4,96226  | 5,45639  | 0,13695       | -0,187082     | 0,851596   | 0,941662   | no  |
| AN9364 | ChrVIII_A_nidulans_FGSC_A4:413228-414758 | WT_5hasex | WT_veg | OK     | 0,996502 | 7,07539  | 2,82786       | -2,84246      | 0,00447671 | 0,0272397  | yes |
| AN9366 | ChrVIII_A_nidulans_FGSC_A4:417332-418364 | WT_5hasex | WT_veg | NOTEST | 0,738386 | 0,885609 | 0,262295      | -0,159115     | 0,873578   | 1          | no  |
| AN9367 | ChrVIII_A_nidulans_FGSC_A4:421778-422823 | WT_5hasex | WT_veg | NOTEST | 0        | 0        | 0             | 0             | 1          | 1          | no  |
| AN9368 | ChrVIII_A_nidulans_FGSC_A4:422951-423930 | WT_5hasex | WT_veg | NOTEST | 0,216942 | 0        | -1.79769e+308 | -1.79769e+308 | 0,165569   | 1          | no  |
| AN9369 | ChrVIII_A_nidulans_FGSC_A4:425120-426884 | WT_5hasex | WT_veg | OK     | 29,763   | 94,7285  | 1,67028       | -2,94927      | 0,00318528 | 0,0205485  | yes |
| AN9370 | ChrVIII_A_nidulans_FGSC_A4:428598-430143 | WT_5hasex | WT_veg | OK     | 26,5846  | 48,7937  | 0,876103      | -1,56799      | 0,116885   | 0,321831   | no  |
| AN9371 | ChrVIII_A_nidulans_FGSC_A4:431325-436469 | WT_5hasex | WT_veg | OK     | 3,09854  | 4,31728  | 0,478533      | -0,791123     | 0,428872   | 0,695352   | no  |
| AN9372 | ChrVIII_A_nidulans_FGSC_A4:438562-440440 | WT_5hasex | WT_veg | NOTEST | 0,225685 | 0        | -1.79769e+308 | -1.79769e+308 | 0,133588   | 1          | no  |
| AN9373 | ChrVIII_A_nidulans_FGSC_A4:442815-444299 | WT_5hasex | WT_veg | OK     | 10,5676  | 27,169   | 1,36232       | -2,26905      | 0,023265   | 0,0998635  | no  |
| AN9374 | ChrVIII_A_nidulans_FGSC_A4:444588-445533 | WT_5hasex | WT_veg | OK     | 2,60988  | 1,7465   | -0,579521     | 0,5325        | 0,59438    | 0,809615   | no  |
| AN9375 | ChrVIII_A_nidulans_FGSC_A4:447056-448302 | WT_5hasex | WT_veg | OK     | 38,7459  | 61,1547  | 0,658419      | -1,23605      | 0,216442   | 0,476454   | no  |
| AN9377 | ChrVIII_A_nidulans_FGSC_A4:453664-454523 | WT_5hasex | WT_veg | OK     | 9,99609  | 25,6469  | 1,35935       | -2,03604      | 0,0417466  | 0,155602   | no  |
| AN9378 | ChrVIII_A_nidulans_FGSC_A4:455025-456284 | WT_5hasex | WT_veg | OK     | 24,2724  | 61,3532  | 1,33782       | -2,44006      | 0,0146848  | 0,0703716  | no  |
| AN9379 | ChrVIII_A_nidulans_FGSC_A4:457899-459380 | WT_5hasex | WT_veg | NOTEST | 0        | 0        | 0             | 0             | 1          | 1          | no  |
| AN9380 | ChrVIII_A_nidulans_FGSC_A4:460350-461295 | WT_5hasex | WT_veg | OK     | 480,032  | 697,802  | 0,539687      | -0,803763     | 0,421534   | 0,6896     | no  |
| AN9381 | ChrVIII_A_nidulans_FGSC_A4:462539-463922 | WT_5hasex | WT_veg | OK     | 20,329   | 45,1031  | 1,14969       | -1,93774      | 0,0526546  | 0,183959   | no  |
| AN9382 | ChrVIII_A_nidulans_FGSC_A4:465369-467302 | WT_5hasex | WT_veg | NOTEST | 0,621157 | 1,10148  | 0,826415      | -0,680937     | 0,495911   | 1          | no  |
| AN9385 | ChrVIII_A_nidulans_FGSC_A4:475091-475819 | WT_5hasex | WT_veg | NOTEST | 0,455876 | 0        | -1.79769e+308 | -1.79769e+308 | 0,165569   | 1          | no  |
| AN9386 | ChrVIII_A_nidulans_FGSC_A4:483618-485066 | WT_5hasex | WT_veg | OK     | 7,3836   | 8,44226  | 0,193304      | -0,27881      | 0,780391   | 0,910375   | no  |
| AN9387 | ChrVIII_A_nidulans_FGSC_A4:485317-486599 | WT_5hasex | WT_veg | NOTEST | 0,686976 | 0,558532 | -0,298621     | 0,189401      | 0,849779   | 1          | no  |
| AN9388 | ChrVIII_A_nidulans_FGSC_A4:487728-488928 | WT_5hasex | WT_veg | OK     | 5,68825  | 5,63923  | -0,0124857    | 0,0162175     | 0,987061   | 0,995359   | no  |
| AN9389 | ChrVIII_A_nidulans_FGSC_A4:492124-493969 | WT_5hasex | WT_veg | NOTEST | 1,02751  | 2,73327  | 1,41148       | -1,61827      | 0,105605   | 1          | no  |
| AN9391 | ChrVIII_A_nidulans_FGSC_A4:498527-499843 | WT_5hasex | WT_veg | OK     | 11,1393  | 21,4393  | 0,944595      | -1,5965       | 0,110376   | 0,309995   | no  |
| AN9392 | ChrVIII_A_nidulans_FGSC_A4:500694-502744 | WT_5hasex | WT_veg | OK     | 28,7982  | 49,921   | 0,793668      | -1,38347      | 0,166521   | 0,405296   | no  |
| AN9393 | ChrVIII_A_nidulans_FGSC_A4:503248-504972 | WT_5hasex | WT_veg | OK     | 11,1452  | 5,78857  | -0,945144     | 1,54481       | 0,122393   | 0,331951   | no  |
| AN9394 | ChrVIII_A_nidulans_FGSC_A4:505183-507138 | WT_5hasex | WT_veg | OK     | 11,1002  | 30,2592  | 1,44678       | -2,43583      | 0,0148576  | 0,0710308  | no  |
| AN9395 | ChrVIII_A_nidulans_FGSC_A4:507314-509836 | WT_5hasex | WT_veg | OK     | 5,06163  | 10,1485  | 1,0036        | -1,62161      | 0,104886   | 0,299458   | no  |
| AN9398 | ChrVIII_A_nidulans_FGSC_A4:514536-516290 | WT_5hasex | WT_veg | OK     | 28,3922  | 224,9    | 2,98572       | -5,9278       | 3,0703E-09 | 9,805E-08  | yes |
| AN9400 | ChrVIII_A_nidulans_FGSC_A4:518861-520852 | WT_5hasex | WT_veg | OK     | 51,4616  | 80,4514  | 0,644622      | -1,33072      | 0,183281   | 0,431032   | no  |
| AN9401 | ChrVIII_A_nidulans_FGSC_A4:521335-522703 | WT_5hasex | WT_veg | OK     | 156,799  | 660,76   | 2,07521       | -4,19561      | 2,7213E-05 | 0,00035141 | yes |
| AN9402 | ChrVIII_A_nidulans_FGSC_A4:522877-524789 | WT_5hasex | WT_veg | OK     | 42,1107  | 56,9924  | 0,436583      | -0,839104     | 0,401411   | 0,673235   | no  |
| AN9404 | ChrVIII_A_nidulans_FGSC_A4:527473-528182 | WT_5hasex | WT_veg | OK     | 81,2816  | 261,684  | 1,68682       | -3,37679      | 0,00073336 | 0,00602724 | yes |
| AN9405 | ChrVIII_A_nidulans_FGSC_A4:528660-529828 | WT_5hasex | WT_veg | OK     | 56,3204  | 121,081  | 1,10424       | -2,25149      | 0,0243542  | 0,10332    | no  |
| AN9409 | ChrVIII_A_nidulans_FGSC_A4:550968-552239 | WT_5hasex | WT_veg | OK     | 48,2588  | 145,355  | 1,59072       | -3,18103      | 0,0014675  | 0,01079    | yes |
| AN9410 | ChrVIII_A_nidulans_FGSC_A4:552924-555885 | WT_5hasex | WT_veg | OK     | 14,3364  | 32,632   | 1,1866        | -2,35159      | 0,0186932  | 0,0845032  | no  |
| AN9414 | ChrII_A_nidulans_FGSC_A4:1489428-1490987 | WT_5hasex | WT_veg | OK     | 3,01393  | 8,49335  | 1,49469       | -1,61448      | 0,106423   | 0,30266    | no  |
| AN9416 | ChrII_A_nidulans_FGSC_A4:1480188-1481250 | WT_5hasex | WT_veg | OK     | 5,99696  | 10,0649  | 0,747027      | -1,03464      | 0,300835   | 0,576541   | no  |
| AN9418 | ChrVII_A_nidulans_FGSC_A4:667536-668203  | WT_5hasex | WT_veg | OK     | 22,1185  | 106,005  | 2,26081       | -3,63084      | 0,0002825  | 0,00268184 | yes |
| AN9419 | ChrVII_A_nidulans_FGSC_A4:668441-672579  | WT_5hasex | WT_veg | OK     | 98,7134  | 292,777  | 1,56849       | -3,04891      | 0,00229671 | 0,0156525  | yes |
| AN9421 | ChrVII_A_nidulans_FGSC_A4:672851-674720  | WT_5hasex | WT_veg | OK     | 58,3502  | 101,759  | 0,802341      | -1,66229      | 0,0964541  | 0,282092   | no  |
| AN9422 | ChrVII_A_nidulans_FGSC_A4:675039-676618  | WT_5hasex | WT_veg | OK     | 83,2622  | 99,3068  | 0,254232      | -0,524293     | 0,600075   | 0,813313   | no  |
| AN9423 | ChrVII_A_nidulans_FGSC_A4:676780-678225  | WT_5hasex | WT_veg | OK     | 42,569   | 49,7264  | 0,224211      | -0,442012     | 0,658481   | 0,846127   | no  |
| AN9424 | ChrVII_A_nidulans_FGSC_A4:679818-680306  | WT_5hasex | WT_veg | OK     | 32,7729  | 86,1228  | 1,39389       | -2,30192      | 0,0213397  | 0,0936476  | no  |

## Supplementary table 1

|        |                                            |           |        |        |          |         |               |               |            |            |     |
|--------|--------------------------------------------|-----------|--------|--------|----------|---------|---------------|---------------|------------|------------|-----|
| AN9425 | ChrVII_A_nidulans_FGSC_A4:459072-460195    | WT_5hasex | WT_veg | OK     | 12,2624  | 34,632  | 1,49787       | -2,28299      | 0,0224307  | 0,0970891  | no  |
| AN9426 | ChrVII_A_nidulans_FGSC_A4:450785-454623    | WT_5hasex | WT_veg | OK     | 2,173    | 4,77857 | 1,13689       | -1,76654      | 0,0773059  | 0,241951   | no  |
| AN9433 | ChrIII_A_nidulans_FGSC_A4:1947750-1948299  | WT_5hasex | WT_veg | OK     | 21,9236  | 201,79  | 3,2023        | -5,25435      | 1,4854E-07 | 3,3265E-06 | yes |
| AN9434 | ChrIII_A_nidulans_FGSC_A4:1949496-1952964  | WT_5hasex | WT_veg | OK     | 25,0954  | 35,7274 | 0,509606      | -1,03912      | 0,298749   | 0,574119   | no  |
| AN9435 | ChrIII_A_nidulans_FGSC_A4:1953797-1956360  | WT_5hasex | WT_veg | OK     | 28,4577  | 28,9655 | 0,0255168     | -0,0515322    | 0,958901   | 0,984798   | no  |
| AN9436 | ChrVIII_A_nidulans_FGSC_A4:2654572-2657115 | WT_5hasex | WT_veg | OK     | 14,9371  | 24,8123 | 0,732158      | -1,41581      | 0,156832   | 0,390288   | no  |
| AN9437 | ChrVIII_A_nidulans_FGSC_A4:2657451-2662811 | WT_5hasex | WT_veg | OK     | 21,8777  | 42,2767 | 0,950399      | -1,91911      | 0,0549699  | 0,189758   | no  |
| AN9438 | ChrVIII_A_nidulans_FGSC_A4:2662968-2664196 | WT_5hasex | WT_veg | OK     | 38,8492  | 51,4499 | 0,405282      | -0,803762     | 0,421535   | 0,6896     | no  |
| AN9440 | ChrI_A_nidulans_FGSC_A4:3700107-3700953    | WT_5hasex | WT_veg | NOTEST | 0        | 0       | 0             | 0             | 1          | 1          | no  |
| AN9441 | ChrI_A_nidulans_FGSC_A4:3701509-3703251    | WT_5hasex | WT_veg | OK     | 2,82376  | 8,11598 | 1,52315       | -2,01071      | 0,0443558  | 0,162828   | no  |
| AN9442 | ChrVII_A_nidulans_FGSC_A4:1309071-1310131  | WT_5hasex | WT_veg | NOTEST | 0        | 0       | 0             | 0             | 1          | 1          | no  |
| AN9443 | ChrVII_A_nidulans_FGSC_A4:1310660-1312049  | WT_5hasex | WT_veg | NOTEST | 0        | 0       | 0             | 0             | 1          | 1          | no  |
| AN9444 | ChrVII_A_nidulans_FGSC_A4:1314063-1315590  | WT_5hasex | WT_veg | OK     | 16,7169  | 36,7799 | 1,13761       | -1,92098      | 0,054734   | 0,189218   | no  |
| AN9445 | ChrIII_A_nidulans_FGSC_A4:874110-874901    | WT_5hasex | WT_veg | OK     | 2,58964  | 3,98524 | 0,621912      | -0,641801     | 0,521002   | 0,76419    | no  |
| AN9448 | ChrVIII_A_nidulans_FGSC_A4:4006994-4010087 | WT_5hasex | WT_veg | OK     | 45,0554  | 37,285  | -0,273104     | 0,556548      | 0,577836   | 0,799673   | no  |
| AN9449 | ChrVIII_A_nidulans_FGSC_A4:4005947-4006835 | WT_5hasex | WT_veg | OK     | 35,1594  | 62,5373 | 0,830805      | -1,55428      | 0,120118   | 0,3279     | no  |
| AN9450 | ChrVIII_A_nidulans_FGSC_A4:4004409-4005377 | WT_5hasex | WT_veg | OK     | 2189,54  | 6195,38 | 1,50056       | -2,31191      | 0,0207829  | 0,0918113  | no  |
| AN9456 | ChrVI_A_nidulans_FGSC_A4:2703602-2704358   | WT_5hasex | WT_veg | OK     | 1,76836  | 4,60411 | 1,38051       | -1,42247      | 0,154891   | 0,38702    | no  |
| AN9457 | ChrVI_A_nidulans_FGSC_A4:2706133-2708569   | WT_5hasex | WT_veg | NOTEST | 0,318648 | 1,66957 | 2,38944       | -1,80186      | 0,0715677  | 1          | no  |
| AN9458 | ChrVI_A_nidulans_FGSC_A4:2708795-2711142   | WT_5hasex | WT_veg | NOTEST | 0,396277 | 1,10094 | 1,47415       | -1,32165      | 0,186286   | 1          | no  |
| AN9460 | ChrII_A_nidulans_FGSC_A4:1083908-1084791   | WT_5hasex | WT_veg | OK     | 59,3854  | 62,0953 | 0,0643743     | -0,125992     | 0,899738   | 0,961432   | no  |
| AN9461 | ChrII_A_nidulans_FGSC_A4:1084855-1087570   | WT_5hasex | WT_veg | OK     | 89,9117  | 107,211 | 0,253876      | -0,513529     | 0,607582   | 0,817795   | no  |
| AN9462 | ChrII_A_nidulans_FGSC_A4:2948432-2948891   | WT_5hasex | WT_veg | OK     | 53,1626  | 91,0894 | 0,776871      | -1,37705      | 0,168496   | 0,408507   | no  |
| AN9463 | ChrII_A_nidulans_FGSC_A4:2949915-2955248   | WT_5hasex | WT_veg | OK     | 25,3555  | 32,4098 | 0,354128      | -0,702656     | 0,48227    | 0,736877   | no  |
| AN9464 | ChrVIII_A_nidulans_FGSC_A4:709807-710832   | WT_5hasex | WT_veg | OK     | 34,9138  | 44,1323 | 0,338035      | -0,650149     | 0,515596   | 0,760072   | no  |
| AN9465 | ChrVIII_A_nidulans_FGSC_A4:711040-712271   | WT_5hasex | WT_veg | OK     | 1276,73  | 2056,88 | 0,688004      | -1,18597      | 0,235633   | 0,50096    | no  |
| AN9466 | ChrVIII_A_nidulans_FGSC_A4:715103-717404   | WT_5hasex | WT_veg | OK     | 50,5136  | 242,242 | 2,26171       | -4,4479       | 8,6714E-06 | 0,00012661 | yes |
| AN9467 | ChrII_A_nidulans_FGSC_A4:449745-452762     | WT_5hasex | WT_veg | OK     | 50,0287  | 59,2328 | 0,243639      | -0,501847     | 0,615775   | 0,82232    | no  |
| AN9468 | ChrI_A_nidulans_FGSC_A4:1661503-1662929    | WT_5hasex | WT_veg | OK     | 1080,45  | 1560,04 | 0,529947      | -0,92172      | 0,356675   | 0,631883   | no  |
| AN9469 | ChrI_A_nidulans_FGSC_A4:1660633-1661334    | WT_5hasex | WT_veg | OK     | 139,795  | 277,738 | 0,990408      | -1,98518      | 0,0471242  | 0,17035    | no  |
| AN9471 | ChrI_A_nidulans_FGSC_A4:1658274-1659001    | WT_5hasex | WT_veg | OK     | 132,67   | 365,604 | 1,46244       | -3,03066      | 0,00244022 | 0,0164741  | yes |
| AN9472 | ChrI_A_nidulans_FGSC_A4:1655899-1657714    | WT_5hasex | WT_veg | OK     | 9,23014  | 15,2542 | 0,724786      | -1,17165      | 0,241337   | 0,507527   | no  |
| AN9473 | ChrV_A_nidulans_FGSC_A4:2233788-2236285    | WT_5hasex | WT_veg | OK     | 133,039  | 131,605 | -0,0156376    | 0,0287246     | 0,977084   | 0,992078   | no  |
| AN9474 | ChrV_A_nidulans_FGSC_A4:2232169-2233402    | WT_5hasex | WT_veg | OK     | 18,6545  | 22,641  | 0,279411      | -0,480565     | 0,630826   | 0,830879   | no  |
| AN9476 | ChrV_A_nidulans_FGSC_A4:708542-709669      | WT_5hasex | WT_veg | NOTEST | 0        | 0       | 0             | 0             | 1          | 1          | no  |
| AN9481 | ChrIII_A_nidulans_FGSC_A4:2700769-2701813  | WT_5hasex | WT_veg | OK     | 24,9911  | 26,858  | 0,103937      | -0,189454     | 0,849737   | 0,941019   | no  |
| AN9482 | ChrIII_A_nidulans_FGSC_A4:2699690-2700280  | WT_5hasex | WT_veg | OK     | 24,5184  | 63,6024 | 1,37521       | -2,253        | 0,0242594  | 0,102999   | no  |
| AN9483 | ChrV_A_nidulans_FGSC_A4:2268673-2269610    | WT_5hasex | WT_veg | OK     | 46,9182  | 194,651 | 2,05267       | -3,9524       | 7,737E-05  | 0,00087718 | yes |
| AN9484 | ChrVII_A_nidulans_FGSC_A4:4221-6584        | WT_5hasex | WT_veg | NOTEST | 0        | 0       | 0             | 0             | 1          | 1          | no  |
| AN9485 | ChrIII_A_nidulans_FGSC_A4:1040310-1042641  | WT_5hasex | WT_veg | OK     | 4,67462  | 2,50521 | -0,899915     | 1,18943       | 0,234272   | 0,499324   | no  |
| AN9486 | ChrIII_A_nidulans_FGSC_A4:1042859-1044280  | WT_5hasex | WT_veg | OK     | 37,056   | 119,176 | 1,68532       | -3,42596      | 0,00061263 | 0,00517957 | yes |
| AN9490 | ChrI_A_nidulans_FGSC_A4:876568-878696      | WT_5hasex | WT_veg | OK     | 6,11228  | 9,78271 | 0,678524      | -1,04518      | 0,295941   | 0,57092    | no  |
| AN9493 | ChrVI_A_nidulans_FGSC_A4:217648-218379     | WT_5hasex | WT_veg | NOTEST | 0        | 0       | 0             | 0             | 1          | 1          | no  |
| AN9494 | ChrVI_A_nidulans_FGSC_A4:214599-216386     | WT_5hasex | WT_veg | NOTEST | 0        | 0       | 0             | 0             | 1          | 1          | no  |
| AN9495 | ChrI_A_nidulans_FGSC_A4:352164-353739      | WT_5hasex | WT_veg | OK     | 7,46445  | 15,7847 | 1,08042       | -1,75938      | 0,0785133  | 0,244648   | no  |
| AN9496 | ChrI_A_nidulans_FGSC_A4:354290-355156      | WT_5hasex | WT_veg | OK     | 29,7831  | 50,823  | 0,770985      | -1,41016      | 0,158494   | 0,39321    | no  |
| AN9497 | ChrI_A_nidulans_FGSC_A4:355248-356334      | WT_5hasex | WT_veg | OK     | 73,5853  | 83,6256 | 0,184527      | -0,371703     | 0,710114   | 0,875212   | no  |
| AN9498 | ChrI_A_nidulans_FGSC_A4:356545-357490      | WT_5hasex | WT_veg | OK     | 19,77    | 23,2438 | 0,233528      | -0,388736     | 0,697471   | 0,867859   | no  |
| AN9499 | ChrI_A_nidulans_FGSC_A4:357608-358867      | WT_5hasex | WT_veg | NOTEST | 0,864982 | 0       | -1.79769e+308 | -1.79769e+308 | 0,0499479  | 1          | no  |
| AN9500 | ChrIII_A_nidulans_FGSC_A4:3182479-3184611  | WT_5hasex | WT_veg | OK     | 183,534  | 196,581 | 0,0990769     | -0,179328     | 0,85768    | 0,944681   | no  |
| AN9501 | ChrV_A_nidulans_FGSC_A4:3329364-3330958    | WT_5hasex | WT_veg | OK     | 7,56871  | 5,28771 | -0,517405     | 0,723404      | 0,469431   | 0,727694   | no  |
| AN9505 | ChrIII_A_nidulans_FGSC_A4:2973772-2974399  | WT_5hasex | WT_veg | OK     | 3,24152  | 10,812  | 1,7379        | -2,07755      | 0,0377509  | 0,144501   | no  |
| AN9506 | ChrII_A_nidulans_FGSC_A4:843296-845313     | WT_5hasex | WT_veg | OK     | 60,8075  | 172,786 | 1,50667       | -3,14568      | 0,00165701 | 0,0119322  | yes |

## Supplementary table 1

|           |                                            |           |        |        |            |          |               |               |            |            |     |
|-----------|--------------------------------------------|-----------|--------|--------|------------|----------|---------------|---------------|------------|------------|-----|
| AN9507    | ChrV_A_nidulans_FGSC_A4:3398063-3401594    | WT_5hasex | WT_veg | NOTEST | 0          | 0        | 0             | 0             | 1          | 1          | no  |
| AN9508    | ChrVII_A_nidulans_FGSC_A4:10710-11578      | WT_5hasex | WT_veg | NOTEST | 0          | 0        | 0             | 0             | 1          | 1          | no  |
| AN9509    | ChrVII_A_nidulans_FGSC_A4:3893231-3894116  | WT_5hasex | WT_veg | OK     | 39,0196    | 115,945  | 1,57117       | -3,05743      | 0,00223241 | 0,0153119  | yes |
| AN9510    | ChrVII_A_nidulans_FGSC_A4:3897666-3899037  | WT_5hasex | WT_veg | OK     | 5,375      | 5,14529  | -0,0630123    | 0,0904688     | 0,927915   | 0,972674   | no  |
| AN9513    | ChrII_A_nidulans_FGSC_A4:3891656-3893201   | WT_5hasex | WT_veg | OK     | 1,59596    | 4,53444  | 1,5065        | -1,84372      | 0,0652233  | 0,214378   | no  |
| AN9514    | ChrIV_A_nidulans_FGSC_A4:681297-682329     | WT_5hasex | WT_veg | OK     | 13,2534    | 18,6989  | 0,496594      | -0,819198     | 0,412673   | 0,682186   | no  |
| AN9515    | ChrVII_A_nidulans_FGSC_A4:958756-959645    | WT_5hasex | WT_veg | OK     | 59,087     | 78,1759  | 0,403884      | -0,78489      | 0,432518   | 0,698721   | no  |
| AN9516    | ChrVIII_A_nidulans_FGSC_A4:893953-895895   | WT_5hasex | WT_veg | OK     | 4,29178    | 2,92384  | -0,553713     | 0,761495      | 0,446361   | 0,709535   | no  |
| AN9517    | ChrVI_A_nidulans_FGSC_A4:2960205-2965474   | WT_5hasex | WT_veg | OK     | 6,38557    | 10,4013  | 0,703876      | -1,09809      | 0,272167   | 0,544708   | no  |
| AN9518    | ChrVII_A_nidulans_FGSC_A4:4269362-4270191  | WT_5hasex | WT_veg | NOTEST | 0,00155959 | 0        | -1.79769e+308 | -1.79769e+308 | 0,49777    | 1          | no  |
| AN9521    | ChrII_A_nidulans_FGSC_A4:1239356-1240346   | WT_5hasex | WT_veg | OK     | 19,0515    | 5,98751  | -1,66988      | 2,46579       | 0,013671   | 0,0665355  | no  |
| AN9522    | ChrII_A_nidulans_FGSC_A4:1237849-1239041   | WT_5hasex | WT_veg | OK     | 7,88507    | 9,17996  | 0,219363      | -0,327684     | 0,743151   | 0,891991   | no  |
| AN9523    | ChrVIII_A_nidulans_FGSC_A4:4621839-4623725 | WT_5hasex | WT_veg | OK     | 46,9349    | 173,842  | 1,88904       | -3,89967      | 9,6323E-05 | 0,0010604  | yes |
| AN9524    | ChrVI_A_nidulans_FGSC_A4:1453063-1454329   | WT_5hasex | WT_veg | NOTEST | 0,499153   | 0        | -1.79769e+308 | -1.79769e+308 | 0,0654719  | 1          | no  |
| AN9528    | ChrI_A_nidulans_FGSC_A4:2499440-2501073    | WT_5hasex | WT_veg | OK     | 24,7239    | 49,9095  | 1,01341       | -1,97537      | 0,0482267  | 0,173201   | no  |
| AN9529    | ChrI_A_nidulans_FGSC_A4:2498151-2499295    | WT_5hasex | WT_veg | OK     | 10,4877    | 13,7664  | 0,392456      | -0,6222       | 0,53381    | 0,772203   | no  |
| AN9531    | ChrVI_A_nidulans_FGSC_A4:3303566-3304571   | WT_5hasex | WT_veg | OK     | 3,18817    | 55,7622  | 4,12849       | -5,17969      | 2,2225E-07 | 4,7908E-06 | yes |
| AN9532    | ChrVI_A_nidulans_FGSC_A4:3304823-3305579   | WT_5hasex | WT_veg | NOTEST | 0          | 0        | 0             | 0             | 1          | 1          | no  |
| AN9533    | ChrII_A_nidulans_FGSC_A4:2129835-2130385   | WT_5hasex | WT_veg | OK     | 9,28103    | 18,5655  | 1,00027       | -1,31319      | 0,189118   | 0,439358   | no  |
| AN9535    | ChrVII_A_nidulans_FGSC_A4:3339120-3340588  | WT_5hasex | WT_veg | NOTEST | 0          | 0,647034 | 1.79769e+308  | 1.79769e+308  | 0,123323   | 1          | no  |
| AN9538    | ChrVII_A_nidulans_FGSC_A4:2978120-2980726  | WT_5hasex | WT_veg | OK     | 115,166    | 206,126  | 0,839816      | -1,66901      | 0,0951162  | 0,279482   | no  |
| AN9540    | ChrVIII_A_nidulans_FGSC_A4:4462938-4464870 | WT_5hasex | WT_veg | OK     | 3,40151    | 12,4777  | 1,87511       | -2,81022      | 0,0049507  | 0,0295004  | yes |
| BEST1     | ChrVII_A_nidulans_FGSC_A4:3331678-3333709  | WT_5hasex | WT_veg | OK     | 100,146    | 384,984  | 1,94269       | -3,85808      | 0,00011428 | 0,00123348 | yes |
| BEST2     | ChrI_A_nidulans_FGSC_A4:3542878-3545548    | WT_5hasex | WT_veg | OK     | 13,7662    | 14,7765  | 0,102176      | -0,167922     | 0,866645   | 0,948839   | no  |
| CYP503B1  | ChrVII_A_nidulans_FGSC_A4:1293395-1295101  | WT_5hasex | WT_veg | NOTEST | 1,37396    | 0,755478 | -0,862883     | 0,741093      | 0,458637   | 1          | no  |
| CYP504E4P | ChrVII_A_nidulans_FGSC_A4:3635913-3637621  | WT_5hasex | WT_veg | NOTEST | 0          | 0,672264 | 1.79769e+308  | 1.79769e+308  | 0,123323   | 1          | no  |
| CYP505A8  | ChrI_A_nidulans_FGSC_A4:3333781-3337144    | WT_5hasex | WT_veg | OK     | 18,5463    | 219,424  | 3,56452       | -7,33672      | 2,1894E-13 | 1,3233E-11 | yes |
| CYP5073A1 | ChrI_A_nidulans_FGSC_A4:887328-889100      | WT_5hasex | WT_veg | OK     | 0,782679   | 6,62015  | 3,08037       | -3,52987      | 0,00041577 | 0,00371474 | yes |
| CYP5076A1 | ChrVIII_A_nidulans_FGSC_A4:3015151-3017116 | WT_5hasex | WT_veg | NOTEST | 2,05021    | 1,96403  | -0,0619504    | 0,0719715     | 0,942625   | 1          | no  |
| CYP5077A1 | ChrI_A_nidulans_FGSC_A4:132652-134483      | WT_5hasex | WT_veg | NOTEST | 0          | 0        | 0             | 0             | 1          | 1          | no  |
| CYP5078A3 | ChrIV_A_nidulans_FGSC_A4:191590-193198     | WT_5hasex | WT_veg | OK     | 2,26929    | 3,3801   | 0,574829      | -0,733252     | 0,463405   | 0,722718   | no  |
| CYP5080B1 | ChrIV_A_nidulans_FGSC_A4:2651566-2653308   | WT_5hasex | WT_veg | OK     | 11,4886    | 10,0149  | -0,198055     | 0,315627      | 0,752286   | 0,896884   | no  |
| CYP5080D1 | ChrV_A_nidulans_FGSC_A4:2430184-2431885    | WT_5hasex | WT_veg | OK     | 3,29473    | 2,03845  | -0,692686     | 0,829609      | 0,40676    | 0,677114   | no  |
| CYP5095B1 | ChrIV_A_nidulans_FGSC_A4:1089069-1090733   | WT_5hasex | WT_veg | NOTEST | 0,154846   | 1,04343  | 2,75244       | -1,33302      | 0,182526   | 1          | no  |
| CYP5116B1 | ChrII_A_nidulans_FGSC_A4:3456126-3457425   | WT_5hasex | WT_veg | OK     | 6,55476    | 3,61146  | -0,859962     | 1,16989       | 0,242046   | 0,508568   | no  |
| CYP5120B1 | ChrV_A_nidulans_FGSC_A4:3114761-3116280    | WT_5hasex | WT_veg | OK     | 170,063    | 367,383  | 1,11122       | -2,10216      | 0,0355391  | 0,138226   | no  |
| CYP5125A1 | ChrV_A_nidulans_FGSC_A4:481461-483182      | WT_5hasex | WT_veg | OK     | 2,47211    | 0        | -1.79769e+308 | -1.79769e+308 | 0,015767   | 0,074354   | no  |
| CYP5128A1 | ChrVII_A_nidulans_FGSC_A4:1665840-1667333  | WT_5hasex | WT_veg | OK     | 38,8638    | 13,9012  | -1,48322      | 2,88649       | 0,00389564 | 0,0242671  | yes |
| CYP52G1   | ChrI_A_nidulans_FGSC_A4:1393259-1394860    | WT_5hasex | WT_veg | OK     | 31,7537    | 5,03015  | -2,65825      | 4,83343       | 1,342E-06  | 2,3928E-05 | yes |
| CYP52H1   | ChrIV_A_nidulans_FGSC_A4:904298-906159     | WT_5hasex | WT_veg | OK     | 5,38138    | 6,2514   | 0,216203      | -0,306957     | 0,758876   | 0,900238   | no  |
| CYP530A3  | ChrV_A_nidulans_FGSC_A4:216327-218077      | WT_5hasex | WT_veg | NOTEST | 0,539097   | 1,2315   | 1,1918        | -1,08113      | 0,279641   | 1          | no  |
| CYP531D2  | ChrV_A_nidulans_FGSC_A4:2039867-2041581    | WT_5hasex | WT_veg | OK     | 12,7777    | 23,2284  | 0,862261      | -1,28888      | 0,197441   | 0,451032   | no  |
| CYP532A4  | ChrVII_A_nidulans_FGSC_A4:2942519-2944211  | WT_5hasex | WT_veg | NOTEST | 1,84624    | 2,92732  | 0,664989      | -0,752858     | 0,451535   | 1          | no  |
| CYP535D1  | ChrVIII_A_nidulans_FGSC_A4:206369-208205   | WT_5hasex | WT_veg | OK     | 27,9138    | 14,0172  | -0,993779     | 1,95735       | 0,0503059  | 0,178298   | no  |
| CYP537B1  | ChrVII_A_nidulans_FGSC_A4:498809-500516    | WT_5hasex | WT_veg | OK     | 47,1433    | 12,6057  | -1,90297      | 3,70115       | 0,00021463 | 0,00211606 | yes |
| CYP539A4P | ChrV_A_nidulans_FGSC_A4:2678849-2680020    | WT_5hasex | WT_veg | OK     | 42,139     | 232,087  | 2,46144       | -4,28134      | 1,8578E-05 | 0,00025058 | yes |
| CYP539B2  | ChrIII_A_nidulans_FGSC_A4:759108-760761    | WT_5hasex | WT_veg | OK     | 4,2136     | 8,66216  | 1,03967       | -1,51916      | 0,128722   | 0,343116   | no  |
| CYP539D1  | ChrII_A_nidulans_FGSC_A4:2653389-2655115   | WT_5hasex | WT_veg | OK     | 7,47538    | 12,5115  | 0,743039      | -1,13326      | 0,257103   | 0,526947   | no  |
| CYP540A2  | ChrVII_A_nidulans_FGSC_A4:433083-434805    | WT_5hasex | WT_veg | NOTEST | 1,06297    | 1,07672  | 0,0185497     | -0,0161361    | 0,987126   | 1          | no  |
| CYP540B4  | ChrII_A_nidulans_FGSC_A4:2848524-2850313   | WT_5hasex | WT_veg | NOTEST | 0,550851   | 0,521322 | -0,0794851    | 0,0510184     | 0,959311   | 1          | no  |
| CYP540D1  | ChrVI_A_nidulans_FGSC_A4:61237-62970       | WT_5hasex | WT_veg | NOTEST | 0,806153   | 0        | -1.79769e+308 | -1.79769e+308 | 0,0315813  | 1          | no  |
| CYP541B1  | ChrII_A_nidulans_FGSC_A4:475133-476785     | WT_5hasex | WT_veg | OK     | 48,1471    | 73,9017  | 0,618159      | -1,27432      | 0,20255    | 0,458213   | no  |
| CYP547C1  | ChrVII_A_nidulans_FGSC_A4:524079-527675    | WT_5hasex | WT_veg | OK     | 14,2848    | 10,4566  | -0,450059     | 0,789061      | 0,430076   | 0,696636   | no  |

## Supplementary table 1

|           |                                            |           |        |        |          |          |               |               |            |            |     |
|-----------|--------------------------------------------|-----------|--------|--------|----------|----------|---------------|---------------|------------|------------|-----|
| CYP548C1  | ChrII_A_nidulans_FGSC_A4:108630-110544     | WT_5hasex | WT_veg | NOTEST | 1,82916  | 1,60399  | -0,189517     | 0,207044      | 0,835975   | 1          | no  |
| CYP548D1  | ChrVII_A_nidulans_FGSC_A4:147870-149790    | WT_5hasex | WT_veg | OK     | 15,0732  | 38,2478  | 1,34339       | -2,41851      | 0,0155842  | 0,0736047  | no  |
| CYP548G2P | ChrVIII_A_nidulans_FGSC_A4:898859-899642   | WT_5hasex | WT_veg | OK     | 4,70807  | 16,3185  | 1,7933        | -2,41475      | 0,015746   | 0,0742752  | no  |
| CYP550B2  | ChrVI_A_nidulans_FGSC_A4:81181-83032       | WT_5hasex | WT_veg | OK     | 21,8227  | 40,4842  | 0,891532      | -1,68959      | 0,0911073  | 0,271154   | no  |
| CYP552A2  | ChrVII_A_nidulans_FGSC_A4:2671980-2673875  | WT_5hasex | WT_veg | NOTEST | 1,89207  | 0,114643 | -4,04475      | 1,3539        | 0,175769   | 1          | no  |
| CYP566C1  | ChrVII_A_nidulans_FGSC_A4:4519587-4521545  | WT_5hasex | WT_veg | NOTEST | 0,205935 | 0        | -1.79769e+308 | -1.79769e+308 | 0,137528   | 1          | no  |
| CYP567C1  | ChrVII_A_nidulans_FGSC_A4:1755115-1756545  | WT_5hasex | WT_veg | NOTEST | 1,44162  | 1,14762  | -0,32904      | 0,301924      | 0,76271    | 1          | no  |
| CYP567D1  | ChrVI_A_nidulans_FGSC_A4:1245110-1247166   | WT_5hasex | WT_veg | NOTEST | 0,151969 | 0,533558 | 1,81187       | -0,797011     | 0,425445   | 1          | no  |
| CYP567E1  | ChrVI_A_nidulans_FGSC_A4:1256764-1258780   | WT_5hasex | WT_veg | OK     | 3,10465  | 0,663581 | -2,22608      | 1,86189       | 0,0626183  | 0,208311   | no  |
| CYP56B1   | ChrVI_A_nidulans_FGSC_A4:3087815-3089459   | WT_5hasex | WT_veg | NOTEST | 0,286441 | 0,533558 | 0,897405      | -0,526321     | 0,598665   | 1          | no  |
| CYP573A3  | ChrIV_A_nidulans_FGSC_A4:2654479-2656276   | WT_5hasex | WT_veg | OK     | 26,7282  | 16,0824  | -0,732882     | 1,42903       | 0,152996   | 0,384077   | no  |
| CYP578B1  | ChrVIII_A_nidulans_FGSC_A4:1559900-1562442 | WT_5hasex | WT_veg | OK     | 13,5453  | 17,3576  | 0,357769      | -0,537668     | 0,590806   | 0,807328   | no  |
| CYP578C1  | ChrVIII_A_nidulans_FGSC_A4:3491118-3492940 | WT_5hasex | WT_veg | OK     | 23,6609  | 32,6741  | 0,465645      | -0,90318      | 0,36643    | 0,641258   | no  |
| CYP584E1  | ChrVIII_A_nidulans_FGSC_A4:471023-472611   | WT_5hasex | WT_veg | OK     | 41,419   | 16,4473  | -1,33244      | 2,62245       | 0,0087301  | 0,0468053  | yes |
| CYP58C1   | ChrV_A_nidulans_FGSC_A4:3044751-3046748    | WT_5hasex | WT_veg | NOTEST | 0,1084   | 0,737778 | 2,76682       | -1,5672       | 0,117068   | 1          | no  |
| CYP58D1   | ChrVIII_A_nidulans_FGSC_A4:250152-251953   | WT_5hasex | WT_veg | NOTEST | 0        | 0        | 0             | 0             | 1          | 1          | no  |
| CYP59C1   | ChrV_A_nidulans_FGSC_A4:1764712-1766510    | WT_5hasex | WT_veg | OK     | 3,80034  | 4,5229   | 0,25112       | -0,347627     | 0,728121   | 0,884835   | no  |
| CYP617D1  | ChrVII_A_nidulans_FGSC_A4:2155379-2157105  | WT_5hasex | WT_veg | NOTEST | 1,3968   | 1,7001   | 0,283492      | -0,311478     | 0,755438   | 1          | no  |
| CYP619B1  | ChrIII_A_nidulans_FGSC_A4:171985-173944    | WT_5hasex | WT_veg | NOTEST | 0        | 0        | 0             | 0             | 1          | 1          | no  |
| CYP619B2  | ChrI_A_nidulans_FGSC_A4:1147810-1149756    | WT_5hasex | WT_veg | NOTEST | 0        | 0        | 0             | 0             | 1          | 1          | no  |
| CYP61A1   | ChrII_A_nidulans_FGSC_A4:2258813-2261165   | WT_5hasex | WT_veg | OK     | 114,446  | 217,683  | 0,927567      | -1,88862      | 0,0589426  | 0,199671   | no  |
| CYP620D1  | ChrVI_A_nidulans_FGSC_A4:847092-848748     | WT_5hasex | WT_veg | OK     | 4,44906  | 1,38882  | -1,67964      | 1,82211       | 0,0684382  | 0,221951   | no  |
| CYP620E1  | ChrVII_A_nidulans_FGSC_A4:1316521-1318592  | WT_5hasex | WT_veg | OK     | 61,1261  | 165,062  | 1,43314       | -2,85709      | 0,00427549 | 0,0262194  | yes |
| CYP623B2  | ChrII_A_nidulans_FGSC_A4:3981609-3983354   | WT_5hasex | WT_veg | OK     | 25,347   | 47,4735  | 0,905307      | -1,78484      | 0,0742876  | 0,234974   | no  |
| CYP62C1   | ChrI_A_nidulans_FGSC_A4:260625-262493      | WT_5hasex | WT_veg | NOTEST | 1,20055  | 0,533558 | -1,16998      | 0,809745      | 0,418087   | 1          | no  |
| CYP630B2  | ChrI_A_nidulans_FGSC_A4:2084671-2086287    | WT_5hasex | WT_veg | OK     | 8,23789  | 13,7305  | 0,737043      | -1,07572      | 0,282053   | 0,555854   | no  |
| CYP630B3P | ChrVII_A_nidulans_FGSC_A4:3150071-3151605  | WT_5hasex | WT_veg | NOTEST | 0,718289 | 0,658224 | -0,125985     | 0,0988847     | 0,92123    | 1          | no  |
| CYP631B1  | ChrVI_A_nidulans_FGSC_A4:1408873-1411158   | WT_5hasex | WT_veg | OK     | 48,2904  | 6,86906  | -2,81355      | 4,60053       | 4,2143E-06 | 6,6277E-05 | yes |
| CYP646A1  | ChrVII_A_nidulans_FGSC_A4:4471549-4473815  | WT_5hasex | WT_veg | OK     | 50,5839  | 133,412  | 1,39914       | -2,90302      | 0,0036958  | 0,0232773  | yes |
| CYP647A1  | ChrII_A_nidulans_FGSC_A4:1273404-1275037   | WT_5hasex | WT_veg | NOTEST | 0,113502 | 0        | -1.79769e+308 | -1.79769e+308 | 0,165569   | 1          | no  |
| CYP648A1  | ChrVI_A_nidulans_FGSC_A4:1322768-1324417   | WT_5hasex | WT_veg | NOTEST | 0,443913 | 2,0456   | 2,20417       | -2,10677      | 0,0351379  | 1          | no  |
| CYP649A1  | ChrVI_A_nidulans_FGSC_A4:1329366-1331069   | WT_5hasex | WT_veg | NOTEST | 0,125866 | 0        | -1.79769e+308 | -1.79769e+308 | 0,165569   | 1          | no  |
| CYP650A1  | ChrVIII_A_nidulans_FGSC_A4:63021-64961     | WT_5hasex | WT_veg | NOTEST | 0,107978 | 0,385531 | 1,83611       | -0,928533     | 0,353131   | 1          | no  |
| CYP650B1  | ChrVIII_A_nidulans_FGSC_A4:57145-58996     | WT_5hasex | WT_veg | NOTEST | 0,726881 | 1,52815  | 1,072         | -1,0446       | 0,296209   | 1          | no  |
| CYP651A1  | ChrVIII_A_nidulans_FGSC_A4:66735-68843     | WT_5hasex | WT_veg | OK     | 2,29075  | 0        | -1.79769e+308 | -1.79769e+308 | 0,0133822  | 0,0654889  | no  |
| CYP652A1  | ChrII_A_nidulans_FGSC_A4:883117-884890     | WT_5hasex | WT_veg | NOTEST | 0,137281 | 0        | -1.79769e+308 | -1.79769e+308 | 0,224063   | 1          | no  |
| CYP653A1  | ChrII_A_nidulans_FGSC_A4:1052574-1054314   | WT_5hasex | WT_veg | NOTEST | 0,229668 | 0        | -1.79769e+308 | -1.79769e+308 | 0,137528   | 1          | no  |
| CYP654A1  | ChrVI_A_nidulans_FGSC_A4:1261130-1262922   | WT_5hasex | WT_veg | NOTEST | 0,153879 | 0,530276 | 1,78494       | -0,785167     | 0,432356   | 1          | no  |
| CYP656A1  | ChrI_A_nidulans_FGSC_A4:543410-544854      | WT_5hasex | WT_veg | NOTEST | 0,967795 | 2,42963  | 1,32796       | -1,26135      | 0,207181   | 1          | no  |
| CYP658A1  | ChrV_A_nidulans_FGSC_A4:483818-485577      | WT_5hasex | WT_veg | OK     | 3,76179  | 0        | -1.79769e+308 | -1.79769e+308 | 0,0317148  | 0,126709   | no  |
| CYP659A1  | ChrVI_A_nidulans_FGSC_A4:1011275-1013229   | WT_5hasex | WT_veg | OK     | 55,3239  | 157,849  | 1,51257       | -2,74899      | 0,005978   | 0,0343825  | yes |
| CYP65AC3P | ChrVIII_A_nidulans_FGSC_A4:3218573-3219108 | WT_5hasex | WT_veg | NOTEST | 0        | 0        | 0             | 0             | 1          | 1          | no  |
| CYP65T1   | ChrIV_A_nidulans_FGSC_A4:1819023-1820762   | WT_5hasex | WT_veg | NOTEST | 1,13072  | 0,53912  | -1,06857      | 0,726783      | 0,467359   | 1          | no  |
| CYP65U1   | ChrI_A_nidulans_FGSC_A4:75437-77092        | WT_5hasex | WT_veg | NOTEST | 1,89547  | 1,06932  | -0,825862     | 0,77918       | 0,435874   | 1          | no  |
| CYP660A1  | ChrII_A_nidulans_FGSC_A4:2034924-2036884   | WT_5hasex | WT_veg | OK     | 4,42026  | 2,97428  | -0,571593     | 0,808998      | 0,418516   | 0,687022   | no  |
| CYP661A1  | ChrVII_A_nidulans_FGSC_A4:4509978-4511795  | WT_5hasex | WT_veg | NOTEST | 0,589999 | 1,02686  | 0,799457      | -0,694687     | 0,487251   | 1          | no  |
| CYP662A1  | ChrVI_A_nidulans_FGSC_A4:98528-100177      | WT_5hasex | WT_veg | OK     | 3,38776  | 0        | -1.79769e+308 | -1.79769e+308 | 0,0113106  | 0,0574041  | no  |
| CYP663A1  | ChrIV_A_nidulans_FGSC_A4:73729-75415       | WT_5hasex | WT_veg | OK     | 11,5738  | 35,9052  | 1,63333       | -2,81094      | 0,00493978 | 0,0294521  | yes |
| CYP664A1  | ChrVI_A_nidulans_FGSC_A4:50053-51895       | WT_5hasex | WT_veg | OK     | 5,11278  | 1,29275  | -1,98366      | 2,16929       | 0,0300608  | 0,121561   | no  |
| CYP665A1  | ChrVI_A_nidulans_FGSC_A4:3016037-3017850   | WT_5hasex | WT_veg | NOTEST | 0,718197 | 0,501482 | -0,518181     | 0,351185      | 0,725449   | 1          | no  |
| CYP666A1  | ChrVII_A_nidulans_FGSC_A4:1788319-1792210  | WT_5hasex | WT_veg | OK     | 6,67565  | 6,3835   | -0,0645604    | 0,102201      | 0,918597   | 0,968916   | no  |
| CYP667A1  | ChrVI_A_nidulans_FGSC_A4:1272152-1274033   | WT_5hasex | WT_veg | NOTEST | 0        | 0        | 0             | 0             | 1          | 1          | no  |
| CYP669A1P | ChrVIII_A_nidulans_FGSC_A4:4907220-4908728 | WT_5hasex | WT_veg | NOTEST | 0,587171 | 0,538371 | -0,12518      | 0,083273      | 0,933634   | 1          | no  |

## Supplementary table 1

|           |                                            |           |        |        |          |          |               |               |            |            |     |
|-----------|--------------------------------------------|-----------|--------|--------|----------|----------|---------------|---------------|------------|------------|-----|
| CYP670A1  | ChrIV_A_nidulans_FGSC_A4:1141922-1143753   | WT_5hasex | WT_veg | NOTEST | 0        | 0        | 0             | 0             | 1          | 1          | no  |
| CYP671A1  | ChrV_A_nidulans_FGSC_A4:167743-169625      | WT_5hasex | WT_veg | OK     | 6,65041  | 21,2162  | 1,67365       | -2,72567      | 0,00641711 | 0,0365153  | yes |
| CYP671B1  | ChrI_A_nidulans_FGSC_A4:1260781-1262670    | WT_5hasex | WT_veg | NOTEST | 1,79773  | 3,19393  | 0,829162      | -0,976667     | 0,328734   | 1          | no  |
| CYP672A1  | ChrI_A_nidulans_FGSC_A4:197544-199456      | WT_5hasex | WT_veg | NOTEST | 1,79198  | 0,59848  | -1,58218      | 1,0783        | 0,280902   | 1          | no  |
| CYP673A1  | ChrV_A_nidulans_FGSC_A4:2831850-2833734    | WT_5hasex | WT_veg | NOTEST | 0,978923 | 2,65683  | 1,44044       | -1,57964      | 0,11419    | 1          | no  |
| CYP674A1  | ChrII_A_nidulans_FGSC_A4:349011-350877     | WT_5hasex | WT_veg | NOTEST | 0,467788 | 0        | -1.79769e+308 | -1.79769e+308 | 0,0537957  | 1          | no  |
| CYP675A1  | ChrIII_A_nidulans_FGSC_A4:1424667-1426737  | WT_5hasex | WT_veg | NOTEST | 1,10606  | 0,221301 | -2,32136      | 1,41595       | 0,15679    | 1          | no  |
| CYP676A1  | ChrVII_A_nidulans_FGSC_A4:320179-322083    | WT_5hasex | WT_veg | NOTEST | 0,108189 | 0,504417 | 2,22106       | -1,14626      | 0,251686   | 1          | no  |
| CYP677A1  | ChrIII_A_nidulans_FGSC_A4:3358478-3360613  | WT_5hasex | WT_veg | OK     | 2,28004  | 3,99675  | 0,809772      | -1,0469       | 0,295146   | 0,569941   | no  |
| CYP678A1  | ChrI_A_nidulans_FGSC_A4:6072-8131          | WT_5hasex | WT_veg | NOTEST | 0        | 0        | 0             | 0             | 1          | 1          | no  |
| CYP679A1  | ChrVI_A_nidulans_FGSC_A4:38065-39794       | WT_5hasex | WT_veg | NOTEST | 0        | 0        | 0             | 0             | 1          | 1          | no  |
| CYP680A1  | ChrVIII_A_nidulans_FGSC_A4:3861640-3863671 | WT_5hasex | WT_veg | NOTEST | 1,55033  | 0,618085 | -1,32669      | 1,09596       | 0,273094   | 1          | no  |
| CYP681A1  | ChrII_A_nidulans_FGSC_A4:3623069-3624677   | WT_5hasex | WT_veg | OK     | 1,14027  | 4,69545  | 2,04189       | -2,52725      | 0,0114959  | 0,0581754  | no  |
| CYP682A1  | ChrII_A_nidulans_FGSC_A4:261299-263016     | WT_5hasex | WT_veg | NOTEST | 0,578313 | 1,4464   | 1,32255       | -1,14176      | 0,253552   | 1          | no  |
| CYP682B1  | ChrV_A_nidulans_FGSC_A4:72945-74626        | WT_5hasex | WT_veg | OK     | 9,29184  | 19,0678  | 1,0371        | -1,52264      | 0,12785    | 0,341484   | no  |
| CYP682C1  | ChrI_A_nidulans_FGSC_A4:3167247-3169167    | WT_5hasex | WT_veg | OK     | 76,7579  | 73,9024  | -0,0546934    | 0,113264      | 0,909821   | 0,965882   | no  |
| CYP682D1  | ChrVII_A_nidulans_FGSC_A4:1906676-1908467  | WT_5hasex | WT_veg | OK     | 38,5094  | 56,2027  | 0,545429      | -1,12094      | 0,262313   | 0,533029   | no  |
| CYP683A1  | ChrVII_A_nidulans_FGSC_A4:88690-90266      | WT_5hasex | WT_veg | NOTEST | 0        | 0        | 0             | 0             | 1          | 1          | no  |
| CYP684A1  | ChrVIII_A_nidulans_FGSC_A4:4245981-4247788 | WT_5hasex | WT_veg | NOTEST | 0,116604 | 0        | -1.79769e+308 | -1.79769e+308 | 0,165569   | 1          | no  |
| CYP686A1P | ChrV_A_nidulans_FGSC_A4:729198-731065      | WT_5hasex | WT_veg | NOTEST | 0,578556 | 0        | -1.79769e+308 | -1.79769e+308 | 0,0908325  | 1          | no  |
| CYP687A1  | ChrVIII_A_nidulans_FGSC_A4:318368-322179   | WT_5hasex | WT_veg | NOTEST | 0,115225 | 0        | -1.79769e+308 | -1.79769e+308 | 0,254408   | 1          | no  |
| CaM       | ChrVII_A_nidulans_FGSC_A4:2692567-2693750  | WT_5hasex | WT_veg | OK     | 750,347  | 1724,31  | 1,20038       | -2,23932      | 0,0251351  | 0,105885   | no  |
| FKBP2     | ChrIII_A_nidulans_FGSC_A4:3319187-3319888  | WT_5hasex | WT_veg | OK     | 44,0123  | 87,6521  | 0,993881      | -1,65624      | 0,0976732  | 0,284548   | no  |
| FKBP3     | ChrIV_A_nidulans_FGSC_A4:1211569-1212328   | WT_5hasex | WT_veg | OK     | 10,7789  | 2,79062  | -1,94956      | 1,2983        | 0,194185   | 0,446205   | no  |
| FKBP4     | ChrV_A_nidulans_FGSC_A4:180153-180675      | WT_5hasex | WT_veg | OK     | 195,202  | 179,978  | -0,117147     | 0,240298      | 0,8101     | 0,923869   | no  |
| FKBP5     | ChrII_A_nidulans_FGSC_A4:2691850-2693836   | WT_5hasex | WT_veg | OK     | 72,5686  | 358,855  | 2,30598       | -4,67758      | 2,9029E-06 | 4,767E-05  | yes |
| H2A.X     | ChrVI_A_nidulans_FGSC_A4:632475-633365     | WT_5hasex | WT_veg | OK     | 4576,83  | 11345,9  | 1,30975       | -1,60773      | 0,107895   | 0,305649   | no  |
| H2A.Z     | ChrII_A_nidulans_FGSC_A4:575780-577193     | WT_5hasex | WT_veg | OK     | 210,79   | 404,925  | 0,941844      | -1,91227      | 0,0558413  | 0,19192    | no  |
| H2B       | ChrVI_A_nidulans_FGSC_A4:631089-632089     | WT_5hasex | WT_veg | OK     | 4037,98  | 9077,45  | 1,16865       | -1,50061      | 0,133456   | 0,351496   | no  |
| H4.1      | ChrVIII_A_nidulans_FGSC_A4:2628892-2629728 | WT_5hasex | WT_veg | OK     | 3478,67  | 5326,04  | 0,614528      | -0,931396     | 0,351649   | 0,627232   | no  |
| H4.2      | ChrVII_A_nidulans_FGSC_A4:3917581-3918364  | WT_5hasex | WT_veg | OK     | 770,165  | 2593,26  | 1,75153       | -3,11025      | 0,00186926 | 0,013184   | yes |
| I-AniI    | Contig-mt197_A_nidulans_FGSC_A4:3141-5362  | WT_5hasex | WT_veg | OK     | 5,23061  | 4,67032  | -0,163456     | 0,18157       | 0,85592    | 0,94373    | no  |
| MAT1      | ChrVI_A_nidulans_FGSC_A4:2908204-2910242   | WT_5hasex | WT_veg | NOTEST | 0,156824 | 0,708536 | 2,1757        | -1,39971      | 0,161601   | 1          | no  |
| MAT2      | ChrIII_A_nidulans_FGSC_A4:1148276-1150127  | WT_5hasex | WT_veg | OK     | 1,94051  | 4,23725  | 1,1267        | -1,48839      | 0,136647   | 0,35692    | no  |
| SpoC1-C1C | ChrIII_A_nidulans_FGSC_A4:29494-30960      | WT_5hasex | WT_veg | OK     | 8,13267  | 22,855   | 1,49071       | -2,36572      | 0,017995   | 0,0821478  | no  |
| SpoC1-C1D | ChrIII_A_nidulans_FGSC_A4:28510-29181      | WT_5hasex | WT_veg | OK     | 18,728   | 5,01128  | -1,90195      | 2,36922       | 0,0178258  | 0,0815671  | no  |
| URFA3     | Contig-mt197_A_nidulans_FGSC_A4:1082-2180  | WT_5hasex | WT_veg | OK     | 2,40665  | 11,0776  | 2,20255       | -2,70673      | 0,00679501 | 0,0382503  | yes |
| aatA      | ChrVI_A_nidulans_FGSC_A4:3358549-3359836   | WT_5hasex | WT_veg | OK     | 7,41088  | 7,9054   | 0,0931945     | -0,124282     | 0,901092   | 0,961987   | no  |
| aatB      | ChrI_A_nidulans_FGSC_A4:3125436-3126746    | WT_5hasex | WT_veg | OK     | 21,052   | 101,988  | 2,27637       | -3,78972      | 0,00015082 | 0,00156094 | yes |
| abaA      | ChrVIII_A_nidulans_FGSC_A4:3598379-3600871 | WT_5hasex | WT_veg | OK     | 1,53871  | 8,79403  | 2,5148        | -3,45081      | 0,0005589  | 0,00478948 | yes |
| abfA      | ChrVII_A_nidulans_FGSC_A4:4272722-4274649  | WT_5hasex | WT_veg | NOTEST | 0        | 3,66909  | 1.79769e+308  | 1.79769e+308  | 8,1777E-05 | 1          | no  |
| abfB      | ChrVII_A_nidulans_FGSC_A4:1207187-1208714  | WT_5hasex | WT_veg | OK     | 3,3836   | 2,12546  | -0,670784     | 0,808462      | 0,418825   | 0,687183   | no  |
| abfC      | ChrVIII_A_nidulans_FGSC_A4:972398-974351   | WT_5hasex | WT_veg | OK     | 10,6266  | 28,5605  | 1,42635       | -2,48824      | 0,0128378  | 0,0634407  | no  |
| abnA      | ChrVII_A_nidulans_FGSC_A4:4257835-4258978  | WT_5hasex | WT_veg | OK     | 1,88478  | 4,30041  | 1,19007       | -1,28405      | 0,199124   | 0,453199   | no  |
| abnB      | ChrI_A_nidulans_FGSC_A4:437663-438929      | WT_5hasex | WT_veg | OK     | 34,8314  | 24,9728  | -0,480032     | 0,949868      | 0,342179   | 0,61775    | no  |
| abnC      | ChrII_A_nidulans_FGSC_A4:483953-485961     | WT_5hasex | WT_veg | OK     | 45,0572  | 3,39757  | -3,72918      | 5,16787       | 2,3678E-07 | 5,0519E-06 | yes |
| abnD      | ChrVI_A_nidulans_FGSC_A4:2021730-2022857   | WT_5hasex | WT_veg | OK     | 45,2567  | 185,856  | 2,03798       | -4,11527      | 3,8673E-05 | 0,00047898 | yes |
| abpA      | ChrVII_A_nidulans_FGSC_A4:598592-601226    | WT_5hasex | WT_veg | OK     | 124,541  | 349,933  | 1,49046       | -2,95558      | 0,00312086 | 0,0202076  | yes |
| abxA      | ChrVII_A_nidulans_FGSC_A4:2723383-2724685  | WT_5hasex | WT_veg | OK     | 3,25477  | 9,02514  | 1,47139       | -1,82707      | 0,067689   | 0,220145   | no  |
| accA      | ChrI_A_nidulans_FGSC_A4:1174373-1181649    | WT_5hasex | WT_veg | OK     | 81,2612  | 284,517  | 1,80788       | -3,17357      | 0,00150579 | 0,0110297  | yes |
| acdA      | ChrVII_A_nidulans_FGSC_A4:3369401-3371029  | WT_5hasex | WT_veg | OK     | 12,4767  | 35,213   | 1,49687       | -2,40802      | 0,0160391  | 0,0753255  | no  |
| acdB      | ChrI_A_nidulans_FGSC_A4:2573331-2575223    | WT_5hasex | WT_veg | OK     | 84,4577  | 80,591   | -0,0676088    | 0,134714      | 0,892838   | 0,959154   | no  |
| aciA      | ChrI_A_nidulans_FGSC_A4:2370052-2371883    | WT_5hasex | WT_veg | OK     | 614,163  | 126,051  | -2,28461      | 4,11703       | 3,8379E-05 | 0,00047567 | yes |

## Supplementary table 1

|      |                                            |           |        |        |           |           |               |               |            |            |     |
|------|--------------------------------------------|-----------|--------|--------|-----------|-----------|---------------|---------------|------------|------------|-----|
| acIA | ChrVII_A_nidulans_FGSC_A4:3944250-3946168  | WT_5hasex | WT_veg | OK     | 365,676   | 1252,41   | 1,77607       | -3,12951      | 0,001751   | 0,0125093  | yes |
| acIB | ChrVII_A_nidulans_FGSC_A4:3947632-3950242  | WT_5hasex | WT_veg | OK     | 233,491   | 1162,8    | 2,31616       | -4,15109      | 3,3089E-05 | 0,00041804 | yes |
| acnA | ChrIV_A_nidulans_FGSC_A4:1107103-1108232   | WT_5hasex | WT_veg | OK     | 3,92391   | 10,8235   | 1,46381       | -1,95666      | 0,0503872  | 0,178477   | no  |
| acoA | ChrV_A_nidulans_FGSC_A4:2516425-2519673    | WT_5hasex | WT_veg | OK     | 573,569   | 1271,91   | 1,14896       | -1,75603      | 0,0790839  | 0,245783   | no  |
| acoB | ChrII_A_nidulans_FGSC_A4:3563778-3564898   | WT_5hasex | WT_veg | OK     | 54,4977   | 68,2295   | 0,3242        | -0,662219     | 0,507831   | 0,754783   | no  |
| acpA | ChrV_A_nidulans_FGSC_A4:1552331-1553876    | WT_5hasex | WT_veg | OK     | 322,268   | 146,663   | -1,13576      | 1,93254       | 0,053293   | 0,18562    | no  |
| acrB | ChrII_A_nidulans_FGSC_A4:3657648-3660761   | WT_5hasex | WT_veg | OK     | 38,2284   | 74,3293   | 0,959288      | -1,99432      | 0,0461168  | 0,167646   | no  |
| actA | ChrI_A_nidulans_FGSC_A4:2418664-2421406    | WT_5hasex | WT_veg | OK     | 969,322   | 1316,17   | 0,441303      | -0,712571     | 0,476111   | 0,732249   | no  |
| acuD | ChrV_A_nidulans_FGSC_A4:2141754-2143748    | WT_5hasex | WT_veg | OK     | 161,922   | 262,166   | 0,695182      | -1,28739      | 0,197959   | 0,45173    | no  |
| acuE | ChrI_A_nidulans_FGSC_A4:2741919-2743963    | WT_5hasex | WT_veg | OK     | 180,656   | 747,546   | 2,04892       | -3,76848      | 0,00016425 | 0,00168201 | yes |
| acuF | ChrVII_A_nidulans_FGSC_A4:2254709-2257396  | WT_5hasex | WT_veg | OK     | 96,3821   | 993,04    | 3,36502       | -6,5792       | 4,73E-11   | 2,0434E-09 | yes |
| acuG | ChrV_A_nidulans_FGSC_A4:2254173-2255661    | WT_5hasex | WT_veg | OK     | 152,968   | 800,672   | 2,38798       | -4,72889      | 2,2575E-06 | 3,8257E-05 | yes |
| acuH | ChrV_A_nidulans_FGSC_A4:3056332-3057462    | WT_5hasex | WT_veg | OK     | 40,2479   | 34,639    | -0,216518     | 0,420625      | 0,674029   | 0,8547     | no  |
| acuJ | ChrI_A_nidulans_FGSC_A4:674979-677366      | WT_5hasex | WT_veg | OK     | 32,9835   | 40,6438   | 0,301291      | -0,627502     | 0,53033    | 0,769816   | no  |
| acuK | ChrIV_A_nidulans_FGSC_A4:1633968-1636138   | WT_5hasex | WT_veg | OK     | 41,4066   | 108,693   | 1,39232       | -2,89153      | 0,00383376 | 0,0239648  | yes |
| acuL | ChrIV_A_nidulans_FGSC_A4:408927-410128     | WT_5hasex | WT_veg | OK     | 32,5932   | 20,4172   | -0,674788     | 1,20384       | 0,22865    | 0,491739   | no  |
| acuM | ChrI_A_nidulans_FGSC_A4:631666-634078      | WT_5hasex | WT_veg | OK     | 44,3091   | 97,751    | 1,14151       | -2,3666       | 0,0179524  | 0,0820035  | no  |
| acuN | ChrV_A_nidulans_FGSC_A4:1820152-1822350    | WT_5hasex | WT_veg | OK     | 1036,65   | 2569,42   | 1,30952       | -1,91903      | 0,0549802  | 0,189762   | no  |
| acvA | ChrVI_A_nidulans_FGSC_A4:3362470-3373783   | WT_5hasex | WT_veg | NOTEST | 0,159556  | 0,0689839 | -1,20973      | 0,809966      | 0,417959   | 1          | no  |
| adb  | ChrVIII_A_nidulans_FGSC_A4:2142205-2144157 | WT_5hasex | WT_veg | OK     | 102,635   | 136,241   | 0,408635      | -0,809709     | 0,418107   | 0,686915   | no  |
| adaB | ChrI_A_nidulans_FGSC_A4:1624847-1626867    | WT_5hasex | WT_veg | OK     | 48,8469   | 104,854   | 1,10204       | -2,2358       | 0,0253648  | 0,106602   | no  |
| afcA | ChrII_A_nidulans_FGSC_A4:906330-909031     | WT_5hasex | WT_veg | NOTEST | 0,171403  | 1,64154   | 3,25959       | -2,35365      | 0,0185901  | 1          | no  |
| afcB | ChrI_A_nidulans_FGSC_A4:2804801-2807344    | WT_5hasex | WT_veg | NOTEST | 0,0705959 | 0         | -1.79769e+308 | -1.79769e+308 | 0,165569   | 1          | no  |
| afcC | ChrVI_A_nidulans_FGSC_A4:1808228-1810502   | WT_5hasex | WT_veg | OK     | 5,34406   | 6,10798   | 0,192759      | -0,302278     | 0,76244    | 0,902002   | no  |
| afIR | ChrIV_A_nidulans_FGSC_A4:2774855-2776157   | WT_5hasex | WT_veg | OK     | 3,19752   | 5,65355   | 0,822203      | -1,10557      | 0,268912   | 0,540734   | no  |
| afoA | ChrVIII_A_nidulans_FGSC_A4:1752487-1754354 | WT_5hasex | WT_veg | NOTEST | 0,385934  | 0         | -1.79769e+308 | -1.79769e+308 | 0,0908325  | 1          | no  |
| afoB | ChrVIII_A_nidulans_FGSC_A4:1746788-1748821 | WT_5hasex | WT_veg | NOTEST | 0,300945  | 0         | -1.79769e+308 | -1.79769e+308 | 0,0966285  | 1          | no  |
| afoC | ChrVIII_A_nidulans_FGSC_A4:1745510-1746404 | WT_5hasex | WT_veg | NOTEST | 0,720301  | 3,00546   | 2,06091       | -1,87704      | 0,0605119  | 1          | no  |
| afoD | ChrVIII_A_nidulans_FGSC_A4:1743453-1744905 | WT_5hasex | WT_veg | NOTEST | 1,18627   | 1,38387   | 0,222275      | -0,212473     | 0,831738   | 1          | no  |
| afoE | ChrVIII_A_nidulans_FGSC_A4:1734327-1742604 | WT_5hasex | WT_veg | NOTEST | 0,767892  | 0,102947  | -2,899        | 2,03069       | 0,0422866  | 1          | no  |
| afoF | ChrVIII_A_nidulans_FGSC_A4:1731553-1733146 | WT_5hasex | WT_veg | NOTEST | 0,482714  | 0         | -1.79769e+308 | -1.79769e+308 | 0,0537957  | 1          | no  |
| afoG | ChrVIII_A_nidulans_FGSC_A4:1721736-1729785 | WT_5hasex | WT_veg | NOTEST | 0,0641172 | 0,20641   | 1,68673       | -1,23155      | 0,218117   | 1          | no  |
| agaA | ChrVI_A_nidulans_FGSC_A4:2453810-2455322   | WT_5hasex | WT_veg | OK     | 181,367   | 744,513   | 2,03738       | -4,07907      | 4,5215E-05 | 0,00054885 | yes |
| agdA | ChrVII_A_nidulans_FGSC_A4:2576599-2579917  | WT_5hasex | WT_veg | OK     | 25,8634   | 41,9299   | 0,697069      | -1,38586      | 0,165789   | 0,404304   | no  |
| agdB | ChrVII_A_nidulans_FGSC_A4:313948-317209    | WT_5hasex | WT_veg | NOTEST | 0,275939  | 0,502293  | 0,864177      | -0,70862      | 0,47856    | 1          | no  |
| agdC | ChrIV_A_nidulans_FGSC_A4:238220-241162     | WT_5hasex | WT_veg | OK     | 1,36467   | 4,72697   | 1,79237       | -2,44817      | 0,0143582  | 0,069167   | no  |
| agdD | ChrIV_A_nidulans_FGSC_A4:1751350-1754004   | WT_5hasex | WT_veg | OK     | 19,7457   | 16,5349   | -0,256023     | 0,503384      | 0,614694   | 0,821657   | no  |
| agdE | ChrVIII_A_nidulans_FGSC_A4:2006879-2009840 | WT_5hasex | WT_veg | OK     | 15,479    | 3,62821   | -2,09298      | 3,21808       | 0,00129054 | 0,00969144 | yes |
| agdF | ChrII_A_nidulans_FGSC_A4:3925504-3927352   | WT_5hasex | WT_veg | NOTEST | 0         | 0,458778  | 1.79769e+308  | 1.79769e+308  | 0,123323   | 1          | no  |
| agdG | ChrIII_A_nidulans_FGSC_A4:816338-818210    | WT_5hasex | WT_veg | OK     | 37,8489   | 42,1714   | 0,156014      | -0,302787     | 0,762053   | 0,901831   | no  |
| aglA | ChrVIII_A_nidulans_FGSC_A4:4837518-4838574 | WT_5hasex | WT_veg | NOTEST | 0         | 0         | 0             | 0             | 1          | 1          | no  |
| aglB | ChrIV_A_nidulans_FGSC_A4:2173225-2174998   | WT_5hasex | WT_veg | OK     | 2,28345   | 7,34654   | 1,68585       | -2,23963      | 0,0251151  | 0,10582    | no  |
| aglC | ChrII_A_nidulans_FGSC_A4:871577-873977     | WT_5hasex | WT_veg | NOTEST | 0,825249  | 0,868191  | 0,0731831     | -0,0674737    | 0,946205   | 1          | no  |
| aglD | ChrIV_A_nidulans_FGSC_A4:845242-847457     | WT_5hasex | WT_veg | NOTEST | 0,118722  | 0         | -1.79769e+308 | -1.79769e+308 | 0,224063   | 1          | no  |
| aglE | ChrV_A_nidulans_FGSC_A4:341736-344192      | WT_5hasex | WT_veg | OK     | 2,67316   | 4,6291    | 0,792184      | -0,953265     | 0,340456   | 0,616169   | no  |
| aglF | ChrII_A_nidulans_FGSC_A4:2815874-2818508   | WT_5hasex | WT_veg | OK     | 9,18643   | 6,80589   | -0,432721     | 0,705379      | 0,480574   | 0,735434   | no  |
| aglG | ChrVII_A_nidulans_FGSC_A4:73020-75288      | WT_5hasex | WT_veg | NOTEST | 0,52942   | 0,640042  | 0,273754      | -0,239446     | 0,81076    | 1          | no  |
| agnB | ChrII_A_nidulans_FGSC_A4:3050135-3051774   | WT_5hasex | WT_veg | OK     | 1,8103    | 6,67446   | 1,88243       | -2,32326      | 0,020165   | 0,089719   | no  |
| agnC | ChrVII_A_nidulans_FGSC_A4:55370-57647      | WT_5hasex | WT_veg | OK     | 4,19425   | 0         | -1.79769e+308 | -1.79769e+308 | 0,00826448 | 0,0447623  | yes |
| agnD | ChrII_A_nidulans_FGSC_A4:1281708-1283194   | WT_5hasex | WT_veg | OK     | 6,88198   | 6,36322   | -0,113066     | 0,166966      | 0,867397   | 0,949242   | no  |
| agnE | ChrVII_A_nidulans_FGSC_A4:1324276-1325803  | WT_5hasex | WT_veg | OK     | 32,0976   | 11,6832   | -1,45803      | 2,26324       | 0,023621   | 0,101003   | no  |
| agsA | ChrI_A_nidulans_FGSC_A4:1910172-1918091    | WT_5hasex | WT_veg | OK     | 21,7224   | 3,75727   | -2,53143      | 3,89095       | 9,9852E-05 | 0,00109414 | yes |
| agsB | ChrVI_A_nidulans_FGSC_A4:1170030-1177766   | WT_5hasex | WT_veg | OK     | 58,5105   | 159,754   | 1,44909       | -2,63959      | 0,00830052 | 0,044874   | yes |

## Supplementary table 1

|       |                                            |           |        |        |          |          |               |               |            |            |     |
|-------|--------------------------------------------|-----------|--------|--------|----------|----------|---------------|---------------|------------|------------|-----|
| agtA  | ChrI_A_nidulans_FGSC_A4:1207131-1209103    | WT_5hasex | WT_veg | OK     | 25,9055  | 54,108   | 1,06258       | -1,73216      | 0,0832453  | 0,254907   | no  |
| aguA  | ChrVIII_A_nidulans_FGSC_A4:175217-177761   | WT_5hasex | WT_veg | OK     | 2,88522  | 4,71848  | 0,709644      | -1,06229      | 0,288105   | 0,562534   | no  |
| ahbB  | ChrV_A_nidulans_FGSC_A4:1262159-1264052    | WT_5hasex | WT_veg | OK     | 12,2227  | 42,0629  | 1,78299       | -3,24559      | 0,00117209 | 0,00895464 | yes |
| aiFA  | ChrVI_A_nidulans_FGSC_A4:424963-426939     | WT_5hasex | WT_veg | OK     | 102,194  | 405,263  | 1,98755       | -3,92299      | 8,7459E-05 | 0,00097677 | yes |
| alcA  | ChrVII_A_nidulans_FGSC_A4:230912-232265    | WT_5hasex | WT_veg | OK     | 114,26   | 84,447   | -0,436199     | 0,853141      | 0,393581   | 0,66681    | no  |
| alcB  | ChrII_A_nidulans_FGSC_A4:3216132-3217452   | WT_5hasex | WT_veg | OK     | 16,8154  | 29,4388  | 0,807933      | -1,30591      | 0,191582   | 0,442688   | no  |
| alcC  | ChrVII_A_nidulans_FGSC_A4:3445133-3446641  | WT_5hasex | WT_veg | OK     | 3863,4   | 456,66   | -3,08068      | 3,91491       | 9,0436E-05 | 0,00100574 | yes |
| alcM  | ChrVII_A_nidulans_FGSC_A4:229514-230204    | WT_5hasex | WT_veg | OK     | 24,1881  | 7,47152  | -1,69482      | 2,41892       | 0,0155669  | 0,0735595  | no  |
| alcP  | ChrVII_A_nidulans_FGSC_A4:238443-239561    | WT_5hasex | WT_veg | NOTEST | 0,76286  | 0,968478 | 0,3443        | -0,260943     | 0,794136   | 1          | no  |
| alcR  | ChrVII_A_nidulans_FGSC_A4:234656-237182    | WT_5hasex | WT_veg | OK     | 5,61053  | 5,18852  | -0,112812     | 0,178431      | 0,858384   | 0,944973   | no  |
| alcS  | ChrVII_A_nidulans_FGSC_A4:227576-228763    | WT_5hasex | WT_veg | OK     | 26,8738  | 9,93814  | -1,43515      | 2,2609        | 0,0237652  | 0,101478   | no  |
| alcU  | ChrVII_A_nidulans_FGSC_A4:225289-226718    | WT_5hasex | WT_veg | OK     | 174,809  | 2663,78  | 3,92962       | -5,62358      | 1,8704E-08 | 5,1023E-07 | yes |
| aldA  | ChrVIII_A_nidulans_FGSC_A4:3188613-3190392 | WT_5hasex | WT_veg | OK     | 258,387  | 468,104  | 0,857297      | -1,59531      | 0,110644   | 0,310466   | no  |
| alg8  | ChrIV_A_nidulans_FGSC_A4:366314-368117     | WT_5hasex | WT_veg | OK     | 22,8096  | 17,787   | -0,358819     | 0,681089      | 0,495815   | 0,746623   | no  |
| alpA  | ChrV_A_nidulans_FGSC_A4:2526429-2529667    | WT_5hasex | WT_veg | OK     | 23,4065  | 45,6547  | 0,963854      | -1,97406      | 0,048375   | 0,17352    | no  |
| amc-1 | ChrVII_A_nidulans_FGSC_A4:571099-572825    | WT_5hasex | WT_veg | OK     | 48,1902  | 172,546  | 1,84017       | -3,83048      | 0,00012789 | 0,00136048 | yes |
| amdA  | ChrVII_A_nidulans_FGSC_A4:3396818-3399596  | WT_5hasex | WT_veg | OK     | 9,54466  | 7,81397  | -0,288638     | 0,516708      | 0,60536    | 0,816602   | no  |
| amdR  | ChrII_A_nidulans_FGSC_A4:2278714-2281256   | WT_5hasex | WT_veg | OK     | 11,5629  | 9,24854  | -0,322211     | 0,582193      | 0,560436   | 0,789354   | no  |
| amdS  | ChrIII_A_nidulans_FGSC_A4:2840150-2842070  | WT_5hasex | WT_veg | OK     | 51,475   | 23,4605  | -1,13364      | 2,23377       | 0,0254985  | 0,107091   | no  |
| amdX  | ChrIV_A_nidulans_FGSC_A4:548934-552540     | WT_5hasex | WT_veg | OK     | 58,2302  | 51,4023  | -0,179936     | 0,370313      | 0,711149   | 0,87587    | no  |
| ampA  | ChrVII_A_nidulans_FGSC_A4:4201708-4203333  | WT_5hasex | WT_veg | OK     | 73,9937  | 158,788  | 1,10162       | -2,29711      | 0,0216126  | 0,0944966  | no  |
| ampB  | ChrIII_A_nidulans_FGSC_A4:2656967-2657908  | WT_5hasex | WT_veg | OK     | 190,447  | 761,015  | 1,99853       | -4,10965      | 3,9626E-05 | 0,00048892 | yes |
| amyA  | ChrVII_A_nidulans_FGSC_A4:2580067-2581974  | WT_5hasex | WT_veg | OK     | 3,4425   | 11,9187  | 1,7917        | -2,53881      | 0,0111231  | 0,0566556  | no  |
| amyB  | ChrVI_A_nidulans_FGSC_A4:825066-827636     | WT_5hasex | WT_veg | NOTEST | 0,223065 | 0        | -1.79769e+308 | -1.79769e+308 | 0,107729   | 1          | no  |
| amyC  | ChrIII_A_nidulans_FGSC_A4:1829546-1831162  | WT_5hasex | WT_veg | NOTEST | 0,79281  | 3,72757  | 2,23319       | -2,57766      | 0,00994732 | 1          | no  |
| amyD  | ChrVI_A_nidulans_FGSC_A4:1165346-1167187   | WT_5hasex | WT_veg | OK     | 178,49   | 311,217  | 0,802072      | -1,60374      | 0,10877    | 0,307183   | no  |
| amyE  | ChrI_A_nidulans_FGSC_A4:532870-534730      | WT_5hasex | WT_veg | OK     | 4,75918  | 9,30702  | 0,967606      | -1,46994      | 0,141579   | 0,365057   | no  |
| amyF  | ChrVI_A_nidulans_FGSC_A4:869076-870743     | WT_5hasex | WT_veg | NOTEST | 0,728107 | 1,05121  | 0,52983       | -0,456001     | 0,648389   | 1          | no  |
| amyG  | ChrVI_A_nidulans_FGSC_A4:1162612-1164648   | WT_5hasex | WT_veg | OK     | 23,5236  | 81,1476  | 1,78644       | -3,53343      | 0,0004102  | 0,00367379 | yes |
| amyR  | ChrVII_A_nidulans_FGSC_A4:2572869-2575087  | WT_5hasex | WT_veg | OK     | 10,1554  | 11,5096  | 0,180595      | -0,323563     | 0,746269   | 0,893524   | no  |
| an2   | ChrIV_A_nidulans_FGSC_A4:690761-692096     | WT_5hasex | WT_veg | OK     | 13,7402  | 20,6524  | 0,587904      | -0,969588     | 0,332252   | 0,608658   | no  |
| anbH1 | ChrIV_A_nidulans_FGSC_A4:2533731-2536136   | WT_5hasex | WT_veg | OK     | 63,4293  | 129,467  | 1,02937       | -2,13922      | 0,0324177  | 0,12882    | no  |
| ankA  | ChrI_A_nidulans_FGSC_A4:2148419-2151678    | WT_5hasex | WT_veg | OK     | 20,1926  | 34,4312  | 0,769891      | -1,60727      | 0,107994   | 0,305638   | no  |
| antA  | ChrVIII_A_nidulans_FGSC_A4:4121425-4122614 | WT_5hasex | WT_veg | OK     | 24,8379  | 35,3824  | 0,510489      | -0,918419     | 0,3584     | 0,633408   | no  |
| aoxA  | ChrI_A_nidulans_FGSC_A4:3062350-3064608    | WT_5hasex | WT_veg | OK     | 18,9244  | 27,2593  | 0,526499      | -1,03726      | 0,299615   | 0,575087   | no  |
| aoxB  | ChrI_A_nidulans_FGSC_A4:3097787-3100194    | WT_5hasex | WT_veg | NOTEST | 0        | 0        | 0             | 0             | 1          | 1          | no  |
| apdA  | ChrV_A_nidulans_FGSC_A4:396315-408251      | WT_5hasex | WT_veg | OK     | 10,4226  | 0,670061 | -3,95928      | 7,44698       | 9,5479E-14 | 6,0646E-12 | yes |
| apdB  | ChrV_A_nidulans_FGSC_A4:387187-389151      | WT_5hasex | WT_veg | NOTEST | 0,571492 | 1,08503  | 0,924925      | -0,75819      | 0,448337   | 1          | no  |
| apdC  | ChrV_A_nidulans_FGSC_A4:389517-390678      | WT_5hasex | WT_veg | NOTEST | 0,166728 | 0,777348 | 2,22106       | -1,14626      | 0,251686   | 1          | no  |
| apdD  | ChrV_A_nidulans_FGSC_A4:391208-393045      | WT_5hasex | WT_veg | NOTEST | 0,259539 | 0,91109  | 1,81164       | -1,28018      | 0,20048    | 1          | no  |
| apdE  | ChrV_A_nidulans_FGSC_A4:394160-395840      | WT_5hasex | WT_veg | NOTEST | 1,51071  | 1,55886  | 0,0452691     | -0,0473308    | 0,96225    | 1          | no  |
| apdF  | ChrV_A_nidulans_FGSC_A4:409380-410739      | WT_5hasex | WT_veg | OK     | 2,40896  | 1,09733  | -1,13441      | 0,970725      | 0,331685   | 0,608045   | no  |
| apdG  | ChrV_A_nidulans_FGSC_A4:419525-420919      | WT_5hasex | WT_veg | OK     | 13,7691  | 26,4559  | 0,942153      | -1,59969      | 0,109668   | 0,308637   | no  |
| apdR  | ChrV_A_nidulans_FGSC_A4:411564-413853      | WT_5hasex | WT_veg | NOTEST | 1,17652  | 2,8643   | 1,28366       | -1,63329      | 0,102408   | 1          | no  |
| apsA  | ChrIV_A_nidulans_FGSC_A4:2611406-2616502   | WT_5hasex | WT_veg | OK     | 69,7623  | 78,8411  | 0,176499      | -0,35386      | 0,723444   | 0,882262   | no  |
| apsB  | ChrVI_A_nidulans_FGSC_A4:724089-728862     | WT_5hasex | WT_veg | OK     | 19,0718  | 37,988   | 0,994102      | -2,03621      | 0,0417294  | 0,15556    | no  |
| aptA  | ChrI_A_nidulans_FGSC_A4:1543569-1549115    | WT_5hasex | WT_veg | NOTEST | 2,00403  | 1,08806  | -0,881139     | 1,21654       | 0,223778   | 1          | no  |
| aptB  | ChrI_A_nidulans_FGSC_A4:1542140-1543137    | WT_5hasex | WT_veg | OK     | 3,17165  | 3,33426  | 0,0721327     | -0,0789439    | 0,937077   | 0,976451   | no  |
| aptC  | ChrI_A_nidulans_FGSC_A4:1540741-1541995    | WT_5hasex | WT_veg | OK     | 7,80165  | 5,59036  | -0,480837     | 0,713473      | 0,475553   | 0,731906   | no  |
| apyA  | ChrVI_A_nidulans_FGSC_A4:1294348-1295661   | WT_5hasex | WT_veg | OK     | 284,887  | 96,8192  | -1,55702      | 2,49062       | 0,0127522  | 0,0631188  | no  |
| arcA  | ChrVIII_A_nidulans_FGSC_A4:4306001-4307855 | WT_5hasex | WT_veg | OK     | 10,3121  | 35,0766  | 1,76617       | -3,0768       | 0,00209235 | 0,0145088  | yes |
| areA  | ChrIII_A_nidulans_FGSC_A4:3191741-3194433  | WT_5hasex | WT_veg | OK     | 59,6087  | 164,201  | 1,46187       | -2,64644      | 0,00813451 | 0,0441908  | yes |
| areB  | ChrI_A_nidulans_FGSC_A4:864311-865664      | WT_5hasex | WT_veg | OK     | 42,8431  | 72,7597  | 0,764078      | -1,39245      | 0,163787   | 0,400914   | no  |

## Supplementary table 1

|         |                                            |           |        |        |           |          |               |               |            |            |     |
|---------|--------------------------------------------|-----------|--------|--------|-----------|----------|---------------|---------------|------------|------------|-----|
| arfA    | ChrVIII_A_nidulans_FGSC_A4:1442965-1444382 | WT_5hasex | WT_veg | OK     | 914,449   | 1655,38  | 0,856191      | -1,4767       | 0,139756   | 0,362082   | no  |
| arfB    | ChrIII_A_nidulans_FGSC_A4:261901-263088    | WT_5hasex | WT_veg | OK     | 63,4534   | 77,0112  | 0,279371      | -0,558785     | 0,576309   | 0,798745   | no  |
| argB    | ChrIII_A_nidulans_FGSC_A4:2132290-2133496  | WT_5hasex | WT_veg | OK     | 347,14    | 761,397  | 1,13313       | -2,16656      | 0,0302682  | 0,122121   | no  |
| arlA    | ChrI_A_nidulans_FGSC_A4:1832725-1833650    | WT_5hasex | WT_veg | OK     | 52,3398   | 176,856  | 1,7566        | -3,40135      | 0,00067054 | 0,00558179 | yes |
| aroC    | ChrI_A_nidulans_FGSC_A4:3410479-3411544    | WT_5hasex | WT_veg | OK     | 79,5876   | 154,437  | 0,956406      | -1,93316      | 0,0532168  | 0,185441   | no  |
| aroF    | ChrV_A_nidulans_FGSC_A4:1943483-1945040    | WT_5hasex | WT_veg | OK     | 80,1942   | 135,11   | 0,752566      | -1,54709      | 0,12184    | 0,331033   | no  |
| aroG    | ChrVIII_A_nidulans_FGSC_A4:3813548-3815215 | WT_5hasex | WT_veg | OK     | 83,3442   | 484,534  | 2,53944       | -5,25391      | 1,489E-07  | 3,3331E-06 | yes |
| aromA   | ChrVIII_A_nidulans_FGSC_A4:2724599-2726364 | WT_5hasex | WT_veg | OK     | 19,0918   | 74,9089  | 1,97218       | -3,79692      | 0,00014651 | 0,00152417 | yes |
| arp11   | ChrVI_A_nidulans_FGSC_A4:1550335-1552009   | WT_5hasex | WT_veg | OK     | 11,6315   | 11,5079  | -0,0154203    | 0,0268991     | 0,97854    | 0,992466   | no  |
| artA    | ChrIII_A_nidulans_FGSC_A4:1847230-1849582  | WT_5hasex | WT_veg | OK     | 549,064   | 1106,94  | 1,01153       | -1,72755      | 0,0840694  | 0,256724   | no  |
| asn1    | Contig-mt197_A_nidulans_FGSC_A4:899-970    | WT_5hasex | WT_veg | NOTEST | 0         | 0        | 0             | 0             | 1          | 1          | no  |
| asp     | Contig-mt188_A_nidulans_FGSC_A4:4668-4741  | WT_5hasex | WT_veg | NOTEST | 0         | 0        | 0             | 0             | 1          | 1          | no  |
| aspA    | ChrIII_A_nidulans_FGSC_A4:1368340-1370066  | WT_5hasex | WT_veg | OK     | 230,787   | 303,515  | 0,395207      | -0,787632     | 0,430912   | 0,697462   | no  |
| aspB    | ChrI_A_nidulans_FGSC_A4:2853509-2856393    | WT_5hasex | WT_veg | OK     | 180,226   | 354,686  | 0,976733      | -1,80729      | 0,0707178  | 0,227207   | no  |
| aspC    | ChrII_A_nidulans_FGSC_A4:1046573-1048647   | WT_5hasex | WT_veg | OK     | 171,615   | 265,413  | 0,62906       | -1,23754      | 0,215885   | 0,475788   | no  |
| aspD    | ChrVIII_A_nidulans_FGSC_A4:650496-653350   | WT_5hasex | WT_veg | OK     | 176,141   | 191,212  | 0,118438      | -0,234028     | 0,814963   | 0,925909   | no  |
| aspE    | ChrIII_A_nidulans_FGSC_A4:931215-933505    | WT_5hasex | WT_veg | OK     | 31,4674   | 32,9854  | 0,0679692     | -0,139417     | 0,889121   | 0,958105   | no  |
| aspend1 | ChrVII_A_nidulans_FGSC_A4:2016787-2018925  | WT_5hasex | WT_veg | OK     | 3,56994   | 8,07699  | 1,17792       | -1,54012      | 0,123531   | 0,333691   | no  |
| atfA    | ChrVI_A_nidulans_FGSC_A4:2424360-2426194   | WT_5hasex | WT_veg | OK     | 255,275   | 983,464  | 1,94582       | -3,46402      | 0,00053217 | 0,00458668 | yes |
| atgH    | ChrV_A_nidulans_FGSC_A4:1239471-1240015    | WT_5hasex | WT_veg | OK     | 634,431   | 1324,01  | 1,06138       | -2,11341      | 0,0345659  | 0,135476   | no  |
| atmA    | ChrVIII_A_nidulans_FGSC_A4:4781834-4790977 | WT_5hasex | WT_veg | OK     | 6,34858   | 12,0382  | 0,923111      | -1,76933      | 0,0768392  | 0,240879   | no  |
| atp20   | ChrVIII_A_nidulans_FGSC_A4:2000923-2001981 | WT_5hasex | WT_veg | OK     | 461,609   | 713,782  | 0,628813      | -1,21726      | 0,223506   | 0,485443   | no  |
| atp8    | Contig-mt188_A_nidulans_FGSC_A4:9819-9966  | WT_5hasex | WT_veg | NOTEST | 0         | 0        | 0             | 0             | 1          | 1          | no  |
| atrA    | ChrVII_A_nidulans_FGSC_A4:406021-410660    | WT_5hasex | WT_veg | OK     | 37,9445   | 1,91388  | -4,30932      | 6,57896       | 4,7375E-11 | 2,0449E-09 | yes |
| atrB    | ChrV_A_nidulans_FGSC_A4:658670-663094      | WT_5hasex | WT_veg | OK     | 42,9223   | 32,7117  | -0,391917     | 0,745245      | 0,456124   | 0,717149   | no  |
| atrC    | ChrII_A_nidulans_FGSC_A4:3625182-3629105   | WT_5hasex | WT_veg | OK     | 6,70219   | 11,2161  | 0,742869      | -1,3375       | 0,18106    | 0,427749   | no  |
| atrD    | ChrVII_A_nidulans_FGSC_A4:3486263-3490718  | WT_5hasex | WT_veg | OK     | 39,5537   | 90,2205  | 1,18964       | -2,24384      | 0,0248427  | 0,104866   | no  |
| aurA    | ChrIII_A_nidulans_FGSC_A4:350066-352204    | WT_5hasex | WT_veg | OK     | 69,1968   | 99,5066  | 0,524087      | -1,06948      | 0,284853   | 0,558807   | no  |
| ausA    | ChrV_A_nidulans_FGSC_A4:307998-315732      | WT_5hasex | WT_veg | NOTEST | 0,193591  | 0        | -1.79769e+308 | -1.79769e+308 | 0,0299414  | 1          | no  |
| avaA    | ChrVIII_A_nidulans_FGSC_A4:4649070-4650081 | WT_5hasex | WT_veg | OK     | 244,388   | 476,365  | 0,962897      | -1,9657       | 0,0493336  | 0,175946   | no  |
| avaB    | ChrI_A_nidulans_FGSC_A4:2969555-2973439    | WT_5hasex | WT_veg | OK     | 32,5258   | 52,9813  | 0,7039        | -1,41254      | 0,15779    | 0,391977   | no  |
| awh11   | ChrII_A_nidulans_FGSC_A4:3270516-3271154   | WT_5hasex | WT_veg | OK     | 751,367   | 12668,8  | 4,07561       | -6,58454      | 4,5628E-11 | 1,976E-09  | yes |
| axeA    | ChrI_A_nidulans_FGSC_A4:1279477-1280504    | WT_5hasex | WT_veg | OK     | 6,35903   | 14,335   | 1,17266       | -1,6512       | 0,098697   | 0,286644   | no  |
| axhA    | ChrII_A_nidulans_FGSC_A4:206064-207499     | WT_5hasex | WT_veg | NOTEST | 0         | 0        | 0             | 0             | 1          | 1          | no  |
| axhB    | ChrVI_A_nidulans_FGSC_A4:3319077-3320061   | WT_5hasex | WT_veg | NOTEST | 0         | 0        | 0             | 0             | 1          | 1          | no  |
| azgA    | ChrV_A_nidulans_FGSC_A4:783049-785064      | WT_5hasex | WT_veg | OK     | 71,5898   | 426,892  | 2,57605       | -5,26659      | 1,3898E-07 | 3,1312E-06 | yes |
| barA    | ChrIII_A_nidulans_FGSC_A4:2364242-2366023  | WT_5hasex | WT_veg | OK     | 27,5663   | 18,4215  | -0,581515     | 1,1143        | 0,265152   | 0,536343   | no  |
| basA    | ChrVIII_A_nidulans_FGSC_A4:2920872-2922620 | WT_5hasex | WT_veg | OK     | 301,26    | 424,593  | 0,495069      | -0,944283     | 0,345025   | 0,620387   | no  |
| bckA    | ChrIII_A_nidulans_FGSC_A4:661193-668978    | WT_5hasex | WT_veg | OK     | 19,5962   | 38,0584  | 0,95764       | -1,91155      | 0,0559345  | 0,192151   | no  |
| bemA    | ChrIV_A_nidulans_FGSC_A4:1256388-1258694   | WT_5hasex | WT_veg | OK     | 44,5561   | 105,615  | 1,24512       | -2,61593      | 0,0088986  | 0,0475287  | yes |
| benA    | ChrVIII_A_nidulans_FGSC_A4:1268092-1270275 | WT_5hasex | WT_veg | OK     | 360,482   | 441,729  | 0,293232      | -0,554461     | 0,579264   | 0,800616   | no  |
| bgIA    | ChrII_A_nidulans_FGSC_A4:2078367-2081349   | WT_5hasex | WT_veg | OK     | 23,9918   | 14,7003  | -0,706689     | 1,28589       | 0,198482   | 0,452428   | no  |
| bgIB    | ChrVIII_A_nidulans_FGSC_A4:2699712-2702436 | WT_5hasex | WT_veg | OK     | 3,99394   | 1,95081  | -1,03374      | 1,48427       | 0,137737   | 0,358678   | no  |
| bgIC    | ChrVII_A_nidulans_FGSC_A4:1944564-1946421  | WT_5hasex | WT_veg | NOTEST | 0,0929579 | 0,866808 | 3,22106       | -1,90802      | 0,056389   | 1          | no  |
| bgID    | ChrII_A_nidulans_FGSC_A4:223094-225686     | WT_5hasex | WT_veg | OK     | 20,5686   | 1,4123   | -3,86432      | 5,44037       | 5,317E-08  | 1,3199E-06 | yes |
| bgIE    | ChrI_A_nidulans_FGSC_A4:2738617-2741777    | WT_5hasex | WT_veg | OK     | 8,40634   | 19,1105  | 1,18482       | -2,2203       | 0,0263987  | 0,109963   | no  |
| bgIF    | ChrII_A_nidulans_FGSC_A4:2718196-2720894   | WT_5hasex | WT_veg | OK     | 7,89608   | 7,57048  | -0,0607519    | 0,102566      | 0,918307   | 0,968799   | no  |
| bgIG    | ChrI_A_nidulans_FGSC_A4:1611902-1614420    | WT_5hasex | WT_veg | NOTEST | 1,71359   | 2,57839  | 0,589451      | -0,786673     | 0,431473   | 1          | no  |
| bgIH    | ChrII_A_nidulans_FGSC_A4:2723819-2726047   | WT_5hasex | WT_veg | OK     | 1,14562   | 5,7001   | 2,31486       | -3,00431      | 0,00266182 | 0,0176922  | yes |
| bgII    | ChrVII_A_nidulans_FGSC_A4:3261604-3264227  | WT_5hasex | WT_veg | OK     | 2,65631   | 5,13824  | 0,951853      | -1,40415      | 0,160273   | 0,395752   | no  |
| bgIJ    | ChrII_A_nidulans_FGSC_A4:54215-56941       | WT_5hasex | WT_veg | OK     | 8,45984   | 2,03641  | -2,0546       | 3,17938       | 0,00147592 | 0,0108412  | yes |
| bgIK    | ChrVII_A_nidulans_FGSC_A4:4529914-4532605  | WT_5hasex | WT_veg | OK     | 2,83487   | 0,465157 | -2,60749      | 2,31366       | 0,0206865  | 0,0914935  | no  |
| bgIL    | ChrVI_A_nidulans_FGSC_A4:2665364-2668923   | WT_5hasex | WT_veg | NOTEST | 1,42      | 1,81115  | 0,351018      | -0,42974      | 0,667385   | 1          | no  |



## Supplementary table 1

|         |                                            |           |        |        |           |          |               |               |            |            |     |
|---------|--------------------------------------------|-----------|--------|--------|-----------|----------|---------------|---------------|------------|------------|-----|
| bgIM    | ChrIV_A_nidulans_FGSC_A4:82957-85625       | WT_5hasex | WT_veg | NOTEST | 0,101796  | 0        | -1.79769e+308 | -1.79769e+308 | 0,224063   | 1          | no  |
| bgIN    | ChrII_A_nidulans_FGSC_A4:2542048-2544734   | WT_5hasex | WT_veg | NOTEST | 0,307281  | 0        | -1.79769e+308 | -1.79769e+308 | 0,0908325  | 1          | no  |
| bgIO    | ChrVIII_A_nidulans_FGSC_A4:3430463-3432883 | WT_5hasex | WT_veg | NOTEST | 0,126681  | 0,521717 | 2,04206       | -0,859018     | 0,390311   | 1          | no  |
| bgIQ    | ChrVIII_A_nidulans_FGSC_A4:2401945-2403040 | WT_5hasex | WT_veg | OK     | 23,2909   | 57,9289  | 1,31452       | -2,40579      | 0,0161374  | 0,075699   | no  |
| bgIR    | ChrVI_A_nidulans_FGSC_A4:170787-172822     | WT_5hasex | WT_veg | NOTEST | 0,368283  | 0        | -1.79769e+308 | -1.79769e+308 | 0,0687549  | 1          | no  |
| biA     | ChrI_A_nidulans_FGSC_A4:2716544-2719138    | WT_5hasex | WT_veg | OK     | 78,0525   | 154,535  | 0,985416      | -1,94319      | 0,0519929  | 0,182402   | no  |
| bimA    | ChrI_A_nidulans_FGSC_A4:1113452-1116672    | WT_5hasex | WT_veg | OK     | 17,6574   | 36,5382  | 1,04913       | -2,14171      | 0,032217   | 0,128237   | no  |
| bimB    | ChrIII_A_nidulans_FGSC_A4:2813222-2819427  | WT_5hasex | WT_veg | OK     | 7,65661   | 9,86398  | 0,365464      | -0,735774     | 0,461868   | 0,72169    | no  |
| bimC    | ChrVI_A_nidulans_FGSC_A4:953139-957343     | WT_5hasex | WT_veg | OK     | 23,5899   | 36,5715  | 0,632554      | -1,3213       | 0,186402   | 0,43554    | no  |
| bimD    | ChrIV_A_nidulans_FGSC_A4:383169-388166     | WT_5hasex | WT_veg | OK     | 7,78229   | 15,5955  | 1,00286       | -1,9543       | 0,050666   | 0,17924    | no  |
| bimE    | ChrVI_A_nidulans_FGSC_A4:2842356-2851019   | WT_5hasex | WT_veg | OK     | 5,3748    | 7,71786  | 0,52199       | -1,02347      | 0,306087   | 0,58223    | no  |
| bimG    | ChrVIII_A_nidulans_FGSC_A4:3641437-3644201 | WT_5hasex | WT_veg | OK     | 68,0884   | 209,422  | 1,62093       | -3,2922       | 0,00099406 | 0,00781204 | yes |
| binA    | ChrIV_A_nidulans_FGSC_A4:2208577-2210525   | WT_5hasex | WT_veg | OK     | 37,3202   | 45,7271  | 0,29309       | -0,551059     | 0,581593   | 0,802066   | no  |
| bioB    | ChrI_A_nidulans_FGSC_A4:2714352-2715631    | WT_5hasex | WT_veg | OK     | 153,693   | 134,698  | -0,190331     | 0,3929        | 0,694393   | 0,866165   | no  |
| bioF    | ChrI_A_nidulans_FGSC_A4:2719846-2721201    | WT_5hasex | WT_veg | OK     | 61,4851   | 162,598  | 1,403         | -2,87165      | 0,00408333 | 0,0252061  | yes |
| bpA     | ChrVII_A_nidulans_FGSC_A4:2727821-2730312  | WT_5hasex | WT_veg | OK     | 254,922   | 370,502  | 0,539429      | -0,994984     | 0,319744   | 0,595896   | no  |
| bnfA    | ChrVI_A_nidulans_FGSC_A4:1456343-1458359   | WT_5hasex | WT_veg | OK     | 20,4618   | 28,4975  | 0,477898      | -0,808775     | 0,418644   | 0,687074   | no  |
| bop1    | ChrVIII_A_nidulans_FGSC_A4:729845-732391   | WT_5hasex | WT_veg | OK     | 14,9778   | 75,943   | 2,34209       | -4,54423      | 5,5138E-06 | 8,4483E-05 | yes |
| breB    | ChrIV_A_nidulans_FGSC_A4:936827-939784     | WT_5hasex | WT_veg | OK     | 28,8358   | 63,3572  | 1,13565       | -2,28136      | 0,0225274  | 0,0973913  | no  |
| brlA    | ChrVIII_A_nidulans_FGSC_A4:1924899-1926301 | WT_5hasex | WT_veg | OK     | 25,2207   | 5,59762  | -2,17172      | 3,21334       | 0,00131203 | 0,00982681 | yes |
| brr6    | ChrIV_A_nidulans_FGSC_A4:754488-756133     | WT_5hasex | WT_veg | OK     | 19,6442   | 32,0288  | 0,70527       | -1,34334      | 0,179162   | 0,424875   | no  |
| btgA    | ChrVIII_A_nidulans_FGSC_A4:1362706-1364403 | WT_5hasex | WT_veg | OK     | 376,145   | 443,992  | 0,239243      | -0,454248     | 0,64965    | 0,841324   | no  |
| btgC    | ChrIII_A_nidulans_FGSC_A4:1251259-1253627  | WT_5hasex | WT_veg | OK     | 49,709    | 81,7549  | 0,717798      | -1,49701      | 0,134389   | 0,353161   | no  |
| btgD    | ChrII_A_nidulans_FGSC_A4:3265092-3266242   | WT_5hasex | WT_veg | OK     | 4,30052   | 2,77762  | -0,630661     | 0,687338      | 0,491869   | 0,743887   | no  |
| btgE    | ChrVII_A_nidulans_FGSC_A4:1139281-1141162  | WT_5hasex | WT_veg | OK     | 658,55    | 933,161  | 0,502834      | -0,882748     | 0,377372   | 0,652083   | no  |
| bubA    | ChrVIII_A_nidulans_FGSC_A4:4046762-4048390 | WT_5hasex | WT_veg | OK     | 19,5555   | 29,1278  | 0,574827      | -1,06722      | 0,285873   | 0,560087   | no  |
| bud3    | ChrVIII_A_nidulans_FGSC_A4:4569067-4573784 | WT_5hasex | WT_veg | OK     | 44,035    | 72,3345  | 0,716035      | -1,44491      | 0,148483   | 0,37643    | no  |
| budA    | ChrVIII_A_nidulans_FGSC_A4:827019-830128   | WT_5hasex | WT_veg | OK     | 10,6265   | 20,1033  | 0,919762      | -1,72405      | 0,0846982  | 0,258089   | no  |
| bxIA    | ChrIII_A_nidulans_FGSC_A4:1828140-1829481  | WT_5hasex | WT_veg | OK     | 349,895   | 714,247  | 1,0295        | -1,74911      | 0,0802721  | 0,248269   | no  |
| bxIB    | ChrV_A_nidulans_FGSC_A4:368796-371088      | WT_5hasex | WT_veg | NOTEST | 0,0994578 | 0        | -1.79769e+308 | -1.79769e+308 | 0,224063   | 1          | no  |
| bxIC    | ChrVII_A_nidulans_FGSC_A4:3228983-3231857  | WT_5hasex | WT_veg | OK     | 3,11832   | 6,59418  | 1,08042       | -1,6296       | 0,103186   | 0,29612    | no  |
| bxID    | ChrII_A_nidulans_FGSC_A4:52204-53848       | WT_5hasex | WT_veg | NOTEST | 0,122041  | 2,95165  | 4,59609       | -2,21977      | 0,0264341  | 1          | no  |
| byrA    | ChrII_A_nidulans_FGSC_A4:1493722-1496699   | WT_5hasex | WT_veg | OK     | 20,1953   | 22,8046  | 0,175304      | -0,351339     | 0,725334   | 0,883249   | no  |
| bzuA    | ChrIV_A_nidulans_FGSC_A4:2063112-2065196   | WT_5hasex | WT_veg | OK     | 15,3373   | 17,6002  | 0,198543      | -0,361887     | 0,717437   | 0,878863   | no  |
| caf1    | ChrIV_A_nidulans_FGSC_A4:2190837-2192883   | WT_5hasex | WT_veg | OK     | 48,3705   | 82,7852  | 0,775247      | -1,60113      | 0,109347   | 0,308115   | no  |
| calA    | ChrIV_A_nidulans_FGSC_A4:2158195-2159099   | WT_5hasex | WT_veg | OK     | 524,346   | 1292,43  | 1,3015        | -2,50828      | 0,0121322  | 0,0606979  | no  |
| canA    | ChrV_A_nidulans_FGSC_A4:2218523-2219575    | WT_5hasex | WT_veg | OK     | 756,569   | 315,582  | -1,26146      | 2,43465       | 0,014906   | 0,0711852  | no  |
| canB    | ChrVII_A_nidulans_FGSC_A4:1948210-1949191  | WT_5hasex | WT_veg | OK     | 628,741   | 671,032  | 0,0939158     | -0,177259     | 0,859305   | 0,945397   | no  |
| candA-C | ChrVII_A_nidulans_FGSC_A4:3999233-4002487  | WT_5hasex | WT_veg | OK     | 23,156    | 37,5655  | 0,69802       | -1,40869      | 0,158926   | 0,393915   | no  |
| candA-N | ChrVIII_A_nidulans_FGSC_A4:4020696-4021776 | WT_5hasex | WT_veg | OK     | 54,3221   | 84,6416  | 0,639827      | -1,27978      | 0,200621   | 0,455295   | no  |
| capA    | ChrVIII_A_nidulans_FGSC_A4:1841136-1843107 | WT_5hasex | WT_veg | OK     | 60,7748   | 88,3513  | 0,53978       | -1,12219      | 0,261781   | 0,532422   | no  |
| carC    | ChrIII_A_nidulans_FGSC_A4:2789388-2790299  | WT_5hasex | WT_veg | OK     | 227,675   | 645,95   | 1,50445       | -3,13589      | 0,00171336 | 0,0122722  | yes |
| casA    | ChrV_A_nidulans_FGSC_A4:1916050-1917816    | WT_5hasex | WT_veg | OK     | 94,3336   | 420,592  | 2,15658       | -4,41951      | 9,8923E-06 | 0,00014272 | yes |
| catA    | ChrIII_A_nidulans_FGSC_A4:3296323-3298751  | WT_5hasex | WT_veg | OK     | 29,8535   | 268,985  | 3,17155       | -6,67107      | 2,5395E-11 | 1,1316E-09 | yes |
| catB    | ChrVIII_A_nidulans_FGSC_A4:329543-332021   | WT_5hasex | WT_veg | OK     | 48,3392   | 45,0482  | -0,101725     | 0,198199      | 0,842889   | 0,937811   | no  |
| catC    | ChrI_A_nidulans_FGSC_A4:1815929-1817926    | WT_5hasex | WT_veg | OK     | 7,29334   | 26,9884  | 1,88769       | -3,18819      | 0,00143164 | 0,0105604  | yes |
| cbhA    | ChrV_A_nidulans_FGSC_A4:1404519-1406211    | WT_5hasex | WT_veg | OK     | 2,08482   | 2,79492  | 0,422883      | -0,507285     | 0,611955   | 0,820019   | no  |
| cbhB    | ChrVIII_A_nidulans_FGSC_A4:3378663-3381196 | WT_5hasex | WT_veg | OK     | 20,4172   | 16,0185  | -0,350051     | 0,652396      | 0,514146   | 0,758811   | no  |
| cbhC    | ChrV_A_nidulans_FGSC_A4:3274475-3276287    | WT_5hasex | WT_veg | NOTEST | 0,161044  | 0,981114 | 2,60696       | -1,17132      | 0,241472   | 1          | no  |
| cbhD    | ChrVIII_A_nidulans_FGSC_A4:983094-984535   | WT_5hasex | WT_veg | OK     | 4,35354   | 8,13193  | 0,90141       | -1,25923      | 0,207947   | 0,465298   | no  |
| ccIA    | ChrVIII_A_nidulans_FGSC_A4:516949-518773   | WT_5hasex | WT_veg | OK     | 15,6379   | 20,8917  | 0,417878      | -0,77991      | 0,435444   | 0,700877   | no  |
| ccp1    | ChrVII_A_nidulans_FGSC_A4:1415977-1417413  | WT_5hasex | WT_veg | OK     | 124,419   | 387,339  | 1,63839       | -3,37782      | 0,00073064 | 0,00601147 | yes |
| ccr4    | ChrII_A_nidulans_FGSC_A4:3642728-3644808   | WT_5hasex | WT_veg | OK     | 77,5075   | 131,964  | 0,767732      | -1,58865      | 0,11214    | 0,313054   | no  |

## Supplementary table 1

|        |                                             |           |        |    |          |         |            |           |            |            |     |
|--------|---------------------------------------------|-----------|--------|----|----------|---------|------------|-----------|------------|------------|-----|
| cct1   | ChrVII_A_nidulans_FGSC_A4:3034399-3036518   | WT_5hasex | WT_veg | OK | 118,729  | 204,354 | 0,783397   | -1,54804  | 0,121612   | 0,330659   | no  |
| cct4   | ChrVI_A_nidulans_FGSC_A4:2400776-2402743    | WT_5hasex | WT_veg | OK | 71,8038  | 96,5698 | 0,427511   | -0,886221 | 0,375499   | 0,650196   | no  |
| cct7   | ChrV_A_nidulans_FGSC_A4:1912946-1915153     | WT_5hasex | WT_veg | OK | 123,768  | 175,053 | 0,50001    | -1,00275  | 0,31598    | 0,592202   | no  |
| cdc31  | ChrV_A_nidulans_FGSC_A4:2197375-2198202     | WT_5hasex | WT_veg | OK | 57,7612  | 130,478 | 1,17563    | -2,32704  | 0,0199633  | 0,0890541  | no  |
| cdc37  | ChrVII_A_nidulans_FGSC_A4:2699868-2701488   | WT_5hasex | WT_veg | OK | 156,826  | 399,9   | 1,35048    | -2,64466  | 0,0081774  | 0,044364   | yes |
| celA   | ChrV_A_nidulans_FGSC_A4:500362-502593       | WT_5hasex | WT_veg | OK | 8,91681  | 10,9278 | 0,293404   | -0,500001 | 0,617074   | 0,822986   | no  |
| cetA   | ChrVI_A_nidulans_FGSC_A4:1911048-1912161    | WT_5hasex | WT_veg | OK | 407,736  | 206,516 | -0,981379  | 1,92104   | 0,0547261  | 0,189218   | no  |
| cetJ   | ChrIII_A_nidulans_FGSC_A4:3294885-3295801   | WT_5hasex | WT_veg | OK | 96,9783  | 446,831 | 2,204      | -4,46211  | 8,1158E-06 | 0,0001195  | yes |
| cetL   | ChrVI_A_nidulans_FGSC_A4:148261-149491      | WT_5hasex | WT_veg | OK | 0,835408 | 4,99653 | 2,58038    | -2,79918  | 0,00512321 | 0,030318   | yes |
| cgrA   | ChrVII_A_nidulans_FGSC_A4:570170-570880     | WT_5hasex | WT_veg | OK | 50,9397  | 338,544 | 2,73248    | -5,1779   | 2,244E-07  | 4,8292E-06 | yes |
| chiA   | ChrII_A_nidulans_FGSC_A4:1246858-1249793    | WT_5hasex | WT_veg | OK | 47,9263  | 17,0318 | -1,49259   | 3,02756   | 0,00246539 | 0,0166141  | yes |
| chiB   | ChrIII_A_nidulans_FGSC_A4:717479-719588     | WT_5hasex | WT_veg | OK | 39,1291  | 137,227 | 1,81025    | -3,75775  | 0,00017145 | 0,0017445  | yes |
| chiC   | ChrVIII_A_nidulans_FGSC_A4:494852-498525    | WT_5hasex | WT_veg | OK | 2,0707   | 3,815   | 0,881563   | -1,30913  | 0,19049    | 0,441371   | no  |
| chkA   | ChrV_A_nidulans_FGSC_A4:2614750-2616533     | WT_5hasex | WT_veg | OK | 14,7085  | 18,1418 | 0,302666   | -0,552443 | 0,580645   | 0,801403   | no  |
| chkB   | ChrII_A_nidulans_FGSC_A4:1524257-1526512    | WT_5hasex | WT_veg | OK | 33,6376  | 79,2251 | 1,23588    | -2,53419  | 0,0112706  | 0,0572402  | no  |
| choC   | ChrVIII_A_nidulans_FGSC_A4:696095-697268    | WT_5hasex | WT_veg | OK | 376,914  | 952,525 | 1,33752    | -2,65635  | 0,00789926 | 0,0431319  | yes |
| chpA   | ChrVIII_A_nidulans_FGSC_A4:1403747-1404946  | WT_5hasex | WT_veg | OK | 106,089  | 533,34  | 2,32979    | -4,54545  | 5,4818E-06 | 8,4067E-05 | yes |
| chsA   | ChrIV_A_nidulans_FGSC_A4:1248665-1251850    | WT_5hasex | WT_veg | OK | 35,6496  | 47,8016 | 0,423171   | -0,874346 | 0,38193    | 0,656065   | no  |
| chsB   | ChrVII_A_nidulans_FGSC_A4:4223814-4227305   | WT_5hasex | WT_veg | OK | 105,676  | 346,971 | 1,71517    | -3,35747  | 0,00078659 | 0,00640041 | yes |
| chsC   | ChrIII_A_nidulans_FGSC_A4:1642519-1646026   | WT_5hasex | WT_veg | OK | 41,8666  | 86,5446 | 1,04764    | -2,19364  | 0,0282616  | 0,115809   | no  |
| chsD   | ChrVII_A_nidulans_FGSC_A4:1154660-1158520   | WT_5hasex | WT_veg | OK | 62,0368  | 90,5043 | 0,544861   | -1,09357  | 0,274145   | 0,546898   | no  |
| chsF   | ChrIII_A_nidulans_FGSC_A4:2260755-2263802   | WT_5hasex | WT_veg | OK | 15,8979  | 5,21132 | -1,60911   | 3,05374   | 0,00226008 | 0,0154693  | yes |
| chsG   | ChrVIII_A_nidulans_FGSC_A4:1687242-1689561  | WT_5hasex | WT_veg | OK | 1,93002  | 7,16687 | 1,89273    | -2,33105  | 0,0197507  | 0,0882707  | no  |
| cipB   | ChrII_A_nidulans_FGSC_A4:167354-168507      | WT_5hasex | WT_veg | OK | 53,2531  | 8,22692 | -2,69444   | 4,89833   | 9,6653E-07 | 1,7765E-05 | yes |
| cipC   | ChrII_A_nidulans_FGSC_A4:271591-272242      | WT_5hasex | WT_veg | OK | 4788,49  | 7786,37 | 0,701378   | -0,991114 | 0,32163    | 0,597941   | no  |
| citA   | ChrII_A_nidulans_FGSC_A4:1352647-1354784    | WT_5hasex | WT_veg | OK | 733,294  | 1742,47 | 1,24867    | -1,97779  | 0,0479529  | 0,172584   | no  |
| clcA   | ChrI_A_nidulans_FGSC_A4:1233062-1235849     | WT_5hasex | WT_veg | OK | 43,1051  | 40,5196 | -0,0892396 | 0,180457  | 0,856794   | 0,944189   | no  |
| clipA  | ChrVII_A_nidulans_FGSC_A4:891748-895216     | WT_5hasex | WT_veg | OK | 43,7528  | 77,0367 | 0,816169   | -1,69113  | 0,0908117  | 0,270621   | no  |
| clrD   | ChrVIII_A_nidulans_FGSC_A4:1312711-1314473  | WT_5hasex | WT_veg | OK | 2,33179  | 4,86336 | 1,06052    | -1,42621  | 0,153809   | 0,385375   | no  |
| clxA   | ChrII_A_nidulans_FGSC_A4:3667524-3669682    | WT_5hasex | WT_veg | OK | 94,7666  | 100,924 | 0,0908143  | -0,181465 | 0,856003   | 0,943746   | no  |
| cmkA   | ChrVII_A_nidulans_FGSC_A4:3847422-3849793   | WT_5hasex | WT_veg | OK | 94,7192  | 216,411 | 1,19205    | -2,44857  | 0,0143424  | 0,0691288  | no  |
| cmkB   | ChrVI_A_nidulans_FGSC_A4:1961441-1963021    | WT_5hasex | WT_veg | OK | 58,2836  | 74,668  | 0,3574     | -0,72905  | 0,465971   | 0,724758   | no  |
| cmkC   | ChrIII_A_nidulans_FGSC_A4:2671947-2674771   | WT_5hasex | WT_veg | OK | 34,6506  | 57,5396 | 0,731676   | -1,45749  | 0,144981   | 0,370908   | no  |
| cnaA   | ChrIII_A_nidulans_FGSC_A4:2697176-2699309   | WT_5hasex | WT_veg | OK | 68,6714  | 104,081 | 0,599925   | -1,22549  | 0,220391   | 0,481849   | no  |
| cntA   | ChrV_A_nidulans_FGSC_A4:2617040-2619026     | WT_5hasex | WT_veg | OK | 45,7219  | 70,2419 | 0,619446   | -1,14535  | 0,252062   | 0,520905   | no  |
| cnxABC | ChrVIII_A_nidulans_FGSC_A4:19886561-1988844 | WT_5hasex | WT_veg | OK | 46,9943  | 79,7532 | 0,763058   | -1,58774  | 0,112345   | 0,313409   | no  |
| cnxE   | ChrII_A_nidulans_FGSC_A4:3081424-3083646    | WT_5hasex | WT_veg | OK | 37,71    | 45,3994 | 0,267728   | -0,534009 | 0,593336   | 0,808949   | no  |
| cnxF   | ChrVII_A_nidulans_FGSC_A4:3571273-3573104   | WT_5hasex | WT_veg | OK | 13,0951  | 22,8308 | 0,801952   | -1,45252  | 0,146356   | 0,373205   | no  |
| cnxG   | ChrVI_A_nidulans_FGSC_A4:318118-318394      | WT_5hasex | WT_veg | OK | 13,9315  | 24,8245 | 0,833414   | -1,04835  | 0,294479   | 0,569252   | no  |
| cnxH   | ChrIII_A_nidulans_FGSC_A4:818467-820139     | WT_5hasex | WT_veg | OK | 99,0658  | 224,595 | 1,18087    | -2,28556  | 0,0222802  | 0,0966174  | no  |
| coaT   | ChrVII_A_nidulans_FGSC_A4:1129711-1131512   | WT_5hasex | WT_veg | OK | 171,739  | 209,496 | 0,286704   | -0,560967 | 0,57482    | 0,798072   | no  |
| cobA   | Contig-mt197_A_nidulans_FGSC_A4:3141-5362   | WT_5hasex | WT_veg | OK | 246,324  | 96,3969 | -1,3535    | 2,34212   | 0,0191743  | 0,0861653  | no  |
| codA   | ChrVII_A_nidulans_FGSC_A4:755021-756749     | WT_5hasex | WT_veg | OK | 48,1501  | 257,735 | 2,42028    | -5,03282  | 4,8332E-07 | 9,5826E-06 | yes |
| conJ   | ChrIII_A_nidulans_FGSC_A4:275209-275802     | WT_5hasex | WT_veg | OK | 179,383  | 24,975  | -2,84449   | 5,43688   | 5,4222E-08 | 1,3434E-06 | yes |
| copA   | ChrVI_A_nidulans_FGSC_A4:2068222-2072256    | WT_5hasex | WT_veg | OK | 59,403   | 75,7155 | 0,350053   | -0,709912 | 0,477759   | 0,733383   | no  |
| cotA   | ChrV_A_nidulans_FGSC_A4:2496911-2499028     | WT_5hasex | WT_veg | OK | 57,659   | 65,0389 | 0,173757   | -0,344645 | 0,730362   | 0,885895   | no  |
| cpa    | ChrVII_A_nidulans_FGSC_A4:3302661-3304455   | WT_5hasex | WT_veg | OK | 156,229  | 554,509 | 1,82755    | -3,63564  | 0,0002773  | 0,00263805 | yes |
| cpcA   | ChrII_A_nidulans_FGSC_A4:3405001-3407450    | WT_5hasex | WT_veg | OK | 372,855  | 2705,88 | 2,85941    | -4,73493  | 2,1913E-06 | 3,7209E-05 | yes |
| cpcB   | ChrII_A_nidulans_FGSC_A4:1903519-1905263    | WT_5hasex | WT_veg | OK | 738,278  | 973,628 | 0,399207   | -0,695512 | 0,486734   | 0,740507   | no  |
| cpeA   | ChrIV_A_nidulans_FGSC_A4:112305-114525      | WT_5hasex | WT_veg | OK | 7,20667  | 49,1011 | 2,76835    | -4,32186  | 1,5472E-05 | 0,00021308 | yes |
| cpyA   | ChrV_A_nidulans_FGSC_A4:2802941-2805294     | WT_5hasex | WT_veg | OK | 545,351  | 743,016 | 0,446208   | -0,772088 | 0,440062   | 0,704193   | yes |
| creA   | ChrI_A_nidulans_FGSC_A4:966618-968620       | WT_5hasex | WT_veg | OK | 101,153  | 310,737 | 1,61916    | -3,3329   | 0,00085944 | 0,00691275 | yes |
| creB   | ChrII_A_nidulans_FGSC_A4:3679809-3682423    | WT_5hasex | WT_veg | OK | 10,2034  | 13,3782 | 0,39084    | -0,715667 | 0,474197   | 0,731005   | no  |

## Supplementary table 1

|        |                                            |           |        |        |          |          |              |              |            |            |     |
|--------|--------------------------------------------|-----------|--------|--------|----------|----------|--------------|--------------|------------|------------|-----|
| creC   | ChrII_A_nidulans_FGSC_A4:1898027-1900402   | WT_5hasex | WT_veg | OK     | 20,1592  | 22,4664  | 0,156328     | -0,306173    | 0,759473   | 0,900446   | no  |
| creD   | ChrII_A_nidulans_FGSC_A4:1877979-1880454   | WT_5hasex | WT_veg | OK     | 236,059  | 675,658  | 1,51715      | -2,83639     | 0,00456262 | 0,0276437  | yes |
| crhA   | ChrII_A_nidulans_FGSC_A4:2661653-2663255   | WT_5hasex | WT_veg | OK     | 41,223   | 61,5671  | 0,57871      | -1,13716     | 0,255472   | 0,524805   | no  |
| crhB   | ChrIII_A_nidulans_FGSC_A4:1803522-1805828  | WT_5hasex | WT_veg | OK     | 419,751  | 406,411  | -0,046593    | 0,0805025    | 0,935838   | 0,975877   | no  |
| crhC   | ChrVIII_A_nidulans_FGSC_A4:2023796-2025711 | WT_5hasex | WT_veg | OK     | 67,8334  | 273,839  | 2,01326      | -4,08908     | 4,3308E-05 | 0,000529   | yes |
| crhD   | ChrVI_A_nidulans_FGSC_A4:1990831-1992679   | WT_5hasex | WT_veg | OK     | 426,938  | 901,421  | 1,07818      | -1,93075     | 0,0535144  | 0,186144   | no  |
| crhE   | ChrI_A_nidulans_FGSC_A4:3663123-3664563    | WT_5hasex | WT_veg | NOTEST | 0,720049 | 2,45893  | 1,77187      | -1,7357      | 0,0826166  | 1          | no  |
| crnA   | ChrVIII_A_nidulans_FGSC_A4:1815134-1816965 | WT_5hasex | WT_veg | OK     | 19,3652  | 54,3935  | 1,48996      | -2,47054     | 0,0134909  | 0,065904   | no  |
| cryA   | ChrVIII_A_nidulans_FGSC_A4:3712565-3714315 | WT_5hasex | WT_veg | OK     | 21,7666  | 51,1735  | 1,23328      | -2,26492     | 0,0235176  | 0,100725   | no  |
| crzA   | ChrV_A_nidulans_FGSC_A4:1881811-1884192    | WT_5hasex | WT_veg | OK     | 25,31    | 28,4707  | 0,169773     | -0,346405    | 0,729038   | 0,885294   | no  |
| cse1   | ChrI_A_nidulans_FGSC_A4:2563237-2566607    | WT_5hasex | WT_veg | OK     | 35,0908  | 57,1346  | 0,703274     | -1,46178     | 0,143801   | 0,368979   | no  |
| csHA   | ChrIV_A_nidulans_FGSC_A4:1009821-1013558   | WT_5hasex | WT_veg | OK     | 41,2855  | 71,6821  | 0,795979     | -1,65        | 0,098942   | 0,287137   | no  |
| csmA   | ChrI_A_nidulans_FGSC_A4:552894-559048      | WT_5hasex | WT_veg | OK     | 102,038  | 140,58   | 0,462283     | -0,862888    | 0,388199   | 0,661606   | no  |
| csmB   | ChrI_A_nidulans_FGSC_A4:561150-566519      | WT_5hasex | WT_veg | OK     | 99,619   | 136,313  | 0,452428     | -0,871086    | 0,383707   | 0,657437   | no  |
| csnA   | ChrVII_A_nidulans_FGSC_A4:951031-952948    | WT_5hasex | WT_veg | OK     | 31,816   | 53,4542  | 0,748551     | -1,50076     | 0,133418   | 0,351432   | no  |
| csnB   | ChrIII_A_nidulans_FGSC_A4:1009519-1011202  | WT_5hasex | WT_veg | OK     | 49,6193  | 72,1707  | 0,540513     | -1,07858     | 0,280775   | 0,554401   | no  |
| csnC   | ChrI_A_nidulans_FGSC_A4:2207352-2209071    | WT_5hasex | WT_veg | OK     | 39,5392  | 80,09    | 1,01834      | -2,06521     | 0,0389027  | 0,147755   | no  |
| csnD   | ChrVII_A_nidulans_FGSC_A4:1102068-1103438  | WT_5hasex | WT_veg | OK     | 31,6696  | 47,0904  | 0,572335     | -1,11785     | 0,263633   | 0,534596   | no  |
| csnE   | ChrVII_A_nidulans_FGSC_A4:2960276-2961336  | WT_5hasex | WT_veg | OK     | 34,7372  | 39,8998  | 0,1999       | -0,381928    | 0,702515   | 0,870864   | no  |
| csnF   | ChrVII_A_nidulans_FGSC_A4:3277542-3278938  | WT_5hasex | WT_veg | OK     | 66,3717  | 84,8339  | 0,354073     | -0,703373    | 0,481823   | 0,736552   | no  |
| csnH   | ChrVII_A_nidulans_FGSC_A4:829739-830495    | WT_5hasex | WT_veg | OK     | 23,9098  | 24,934   | 0,060513     | -0,10001     | 0,920336   | 0,969611   | no  |
| cutA   | ChrIV_A_nidulans_FGSC_A4:2574281-2577685   | WT_5hasex | WT_veg | OK     | 10,201   | 16,3939  | 0,684448     | -1,31307     | 0,189161   | 0,439438   | no  |
| cwc27  | ChrII_A_nidulans_FGSC_A4:631553-633230     | WT_5hasex | WT_veg | OK     | 11,9794  | 37,895   | 1,66145      | -2,99205     | 0,00277108 | 0,0182907  | yes |
| cyaA   | ChrII_A_nidulans_FGSC_A4:2666070-2672658   | WT_5hasex | WT_veg | OK     | 10,1557  | 15,9931  | 0,655164     | -1,32042     | 0,186696   | 0,435906   | no  |
| cycA   | ChrI_A_nidulans_FGSC_A4:768944-769452      | WT_5hasex | WT_veg | OK     | 1635,95  | 4555,96  | 1,47762      | -2,56595     | 0,0102895  | 0,0532668  | no  |
| cyp1   | ChrIII_A_nidulans_FGSC_A4:3389945-3390715  | WT_5hasex | WT_veg | OK     | 1129,46  | 3847,91  | 1,76845      | -3,20178     | 0,0013658  | 0,0101548  | yes |
| cyp10  | ChrVIII_A_nidulans_FGSC_A4:3728230-3730214 | WT_5hasex | WT_veg | OK     | 17,667   | 23,5046  | 0,411891     | -0,797893    | 0,424932   | 0,692646   | no  |
| cyp2   | ChrIII_A_nidulans_FGSC_A4:3136175-3136784  | WT_5hasex | WT_veg | OK     | 83,6958  | 109,717  | 0,390561     | -0,765673    | 0,443871   | 0,707523   | no  |
| cyp4   | ChrVII_A_nidulans_FGSC_A4:668441-672579    | WT_5hasex | WT_veg | OK     | 59,2896  | 193,131  | 1,70373      | -3,25421     | 0,0011371  | 0,00873057 | yes |
| cyp5   | ChrVII_A_nidulans_FGSC_A4:3982196-3983059  | WT_5hasex | WT_veg | OK     | 33,8304  | 77,4182  | 1,19435      | -2,15192     | 0,0314037  | 0,125756   | no  |
| cyp51B | ChrII_A_nidulans_FGSC_A4:1379936-1381905   | WT_5hasex | WT_veg | OK     | 166,328  | 253,794  | 0,609626     | -1,21025     | 0,226182   | 0,488919   | no  |
| cyp7   | ChrIII_A_nidulans_FGSC_A4:1607337-1609067  | WT_5hasex | WT_veg | OK     | 179,398  | 509,657  | 1,50636      | -2,97478     | 0,002932   | 0,0191781  | yes |
| cyp8   | ChrVI_A_nidulans_FGSC_A4:449482-451116     | WT_5hasex | WT_veg | OK     | 22,582   | 98,1537  | 2,11987      | -4,08197     | 4,4656E-05 | 0,00054294 | yes |
| cyp9   | ChrI_A_nidulans_FGSC_A4:3499024-3500954    | WT_5hasex | WT_veg | OK     | 28,6412  | 76,466   | 1,41673      | -2,89084     | 0,00384209 | 0,0239997  | yes |
| cypA   | ChrII_A_nidulans_FGSC_A4:2976762-2978292   | WT_5hasex | WT_veg | OK     | 698,228  | 1033,26  | 0,565429     | -1,02789     | 0,304003   | 0,580076   | no  |
| cypB   | ChrIII_A_nidulans_FGSC_A4:1959337-1960590  | WT_5hasex | WT_veg | OK     | 418,988  | 499,404  | 0,253299     | -0,468498    | 0,639429   | 0,835569   | no  |
| cys2   | Contig-mt197_A_nidulans_FGSC_A4:5645-5716  | WT_5hasex | WT_veg | NOTEST | 0        | 0        | 0            | 0            | 1          | 1          | no  |
| cysA   | ChrV_A_nidulans_FGSC_A4:883558-885112      | WT_5hasex | WT_veg | OK     | 49,1217  | 69,1208  | 0,492761     | -1,00503     | 0,314881   | 0,591052   | no  |
| cysB   | ChrII_A_nidulans_FGSC_A4:623939-625133     | WT_5hasex | WT_veg | OK     | 73,3213  | 60,3064  | -0,281922    | 0,56375      | 0,572924   | 0,796829   | no  |
| cysD   | ChrII_A_nidulans_FGSC_A4:1359447-1361266   | WT_5hasex | WT_veg | OK     | 228,741  | 183,871  | -0,315021    | 0,61159      | 0,540809   | 0,776233   | no  |
| cysF   | ChrVII_A_nidulans_FGSC_A4:1023714-1025203  | WT_5hasex | WT_veg | OK     | 20,1885  | 32,6129  | 0,691912     | -1,27665     | 0,201727   | 0,457075   | no  |
| dclA   | ChrVIII_A_nidulans_FGSC_A4:4535060-4536675 | WT_5hasex | WT_veg | OK     | 1,6768   | 8,44778  | 2,33286      | -2,86286     | 0,00419833 | 0,0258096  | yes |
| dclB   | ChrVI_A_nidulans_FGSC_A4:1531555-1535659   | WT_5hasex | WT_veg | OK     | 1,86539  | 4,57719  | 1,29498      | -1,84423     | 0,0651491  | 0,214201   | no  |
| dcp1   | ChrIV_A_nidulans_FGSC_A4:2570523-2571336   | WT_5hasex | WT_veg | OK     | 27,6202  | 12,7156  | -1,11912     | 1,88499      | 0,0594318  | 0,20099    | no  |
| ddbA   | ChrVIII_A_nidulans_FGSC_A4:3037582-3041333 | WT_5hasex | WT_veg | OK     | 23,7608  | 60,5363  | 1,34922      | -2,67641     | 0,00744165 | 0,0411304  | yes |
| devR   | ChrIV_A_nidulans_FGSC_A4:1931434-1933074   | WT_5hasex | WT_veg | OK     | 31,1343  | 32,5358  | 0,0635245    | -0,124824    | 0,900663   | 0,961811   | no  |
| dewA   | ChrII_A_nidulans_FGSC_A4:481381-482182     | WT_5hasex | WT_veg | NOTEST | 1,09632  | 1,3149   | 0,262295     | -0,159115    | 0,873578   | 1          | no  |
| dfgA   | ChrVI_A_nidulans_FGSC_A4:2679618-2681181   | WT_5hasex | WT_veg | NOTEST | 0        | 0,586833 | 1.79769e+308 | 1.79769e+308 | 0,123323   | 1          | no  |
| dfgB   | ChrV_A_nidulans_FGSC_A4:436110-437803      | WT_5hasex | WT_veg | OK     | 184,29   | 281,888  | 0,61315      | -1,21942     | 0,222685   | 0,484486   | no  |
| dfgC   | ChrVIII_A_nidulans_FGSC_A4:3694451-3696404 | WT_5hasex | WT_veg | OK     | 23,5592  | 61,0179  | 1,37294      | -2,62993     | 0,00854034 | 0,0459581  | yes |
| dfgD   | ChrVI_A_nidulans_FGSC_A4:2007294-2009051   | WT_5hasex | WT_veg | OK     | 19,3937  | 23,9646  | 0,305319     | -0,567512    | 0,570366   | 0,79522    | no  |
| dfgE   | ChrVIII_A_nidulans_FGSC_A4:3722102-3723173 | WT_5hasex | WT_veg | NOTEST | 1,45074  | 2,46202  | 0,763053     | -0,740966    | 0,458714   | 1          | no  |
| dfgF   | ChrI_A_nidulans_FGSC_A4:47155-48424        | WT_5hasex | WT_veg | OK     | 3,76924  | 0,151661 | -4,63536     | 1,55367      | 0,120263   | 0,32815    | no  |

## Supplementary table 1

|      |                                            |           |        |        |          |           |               |               |            |            |     |
|------|--------------------------------------------|-----------|--------|--------|----------|-----------|---------------|---------------|------------|------------|-----|
| dfgG | ChrIII_A_nidulans_FGSC_A4:1835661-1838198  | WT_5hasex | WT_veg | OK     | 31,0652  | 48,1535   | 0,632342      | -1,30191      | 0,192947   | 0,444647   | no  |
| dhbD | ChrI_A_nidulans_FGSC_A4:2984736-2985844    | WT_5hasex | WT_veg | OK     | 3,38023  | 8,35803   | 1,30604       | -1,48774      | 0,13682    | 0,357267   | no  |
| dicA | ChrI_A_nidulans_FGSC_A4:746953-748089      | WT_5hasex | WT_veg | OK     | 63,8586  | 260,615   | 2,02897       | -3,90421      | 9,4534E-05 | 0,00104361 | yes |
| dicB | ChrVII_A_nidulans_FGSC_A4:2249417-2250655  | WT_5hasex | WT_veg | OK     | 35,3073  | 49,1976   | 0,478621      | -0,804526     | 0,421093   | 0,689265   | no  |
| didB | ChrVIII_A_nidulans_FGSC_A4:510377-511315   | WT_5hasex | WT_veg | OK     | 176,366  | 580,597   | 1,71896       | -3,58114      | 0,0003421  | 0,00314725 | yes |
| digA | ChrVII_A_nidulans_FGSC_A4:3382947-3385969  | WT_5hasex | WT_veg | OK     | 41,4218  | 48,4659   | 0,226583      | -0,470476     | 0,638015   | 0,834888   | no  |
| ditA | ChrVI_A_nidulans_FGSC_A4:3090383-3092336   | WT_5hasex | WT_veg | NOTEST | 0,259171 | 0,45315   | 0,806086      | -0,472763     | 0,636382   | 1          | no  |
| dmtA | ChrI_A_nidulans_FGSC_A4:2696498-2698570    | WT_5hasex | WT_veg | OK     | 4,63904  | 6,31486   | 0,444926      | -0,666629     | 0,505009   | 0,753151   | no  |
| dopA | ChrVII_A_nidulans_FGSC_A4:2841418-2847418  | WT_5hasex | WT_veg | OK     | 11,2173  | 9,37828   | -0,258335     | 0,527495      | 0,59785    | 0,811936   | no  |
| dps1 | ChrIII_A_nidulans_FGSC_A4:1685438-1687323  | WT_5hasex | WT_veg | OK     | 75,5097  | 75,0381   | -0,00903959   | 0,0186444     | 0,985125   | 0,994523   | no  |
| easA | ChrVII_A_nidulans_FGSC_A4:4288452-4309340  | WT_5hasex | WT_veg | OK     | 4,10882  | 7,34863   | 0,838751      | -1,59232      | 0,111313   | 0,311608   | no  |
| easB | ChrVII_A_nidulans_FGSC_A4:4313089-4320711  | WT_5hasex | WT_veg | OK     | 36,9728  | 20,2898   | -0,865708     | 1,55704       | 0,11946    | 0,326719   | no  |
| easC | ChrVII_A_nidulans_FGSC_A4:4321940-4323433  | WT_5hasex | WT_veg | OK     | 45,183   | 17,805    | -1,3435       | 2,52341       | 0,0116224  | 0,0586629  | no  |
| easD | ChrVII_A_nidulans_FGSC_A4:4323905-4325876  | WT_5hasex | WT_veg | OK     | 133,883  | 174,718   | 0,384061      | -0,684312     | 0,493778   | 0,745215   | no  |
| echA | ChrI_A_nidulans_FGSC_A4:1822453-1823565    | WT_5hasex | WT_veg | OK     | 45,4813  | 64,4388   | 0,502654      | -0,983333     | 0,325443   | 0,602058   | no  |
| ecmA | ChrIII_A_nidulans_FGSC_A4:2176136-2178008  | WT_5hasex | WT_veg | OK     | 1426,2   | 2663,43   | 0,90111       | -1,35945      | 0,174005   | 0,417404   | no  |
| edc3 | ChrI_A_nidulans_FGSC_A4:3496380-3498866    | WT_5hasex | WT_veg | OK     | 26,1407  | 61,5874   | 1,23634       | -2,52808      | 0,0114687  | 0,0580822  | no  |
| eglA | ChrVIII_A_nidulans_FGSC_A4:950782-952010   | WT_5hasex | WT_veg | OK     | 4,09111  | 4,44322   | 0,119113      | -0,149022     | 0,881536   | 0,954999   | no  |
| eglB | ChrVI_A_nidulans_FGSC_A4:784974-786267     | WT_5hasex | WT_veg | NOTEST | 1,47     | 1,4343    | -0,0354726    | 0,0339695     | 0,972902   | 1          | no  |
| eglC | ChrII_A_nidulans_FGSC_A4:307499-309171     | WT_5hasex | WT_veg | OK     | 1601     | 2431,03   | 0,602595      | -0,90036      | 0,367929   | 0,642737   | no  |
| eglD | ChrIV_A_nidulans_FGSC_A4:2536419-2537571   | WT_5hasex | WT_veg | OK     | 36,1363  | 28,9341   | -0,320677     | 0,613485      | 0,539556   | 0,775135   | no  |
| eglE | ChrVI_A_nidulans_FGSC_A4:3075421-3076643   | WT_5hasex | WT_veg | NOTEST | 0,190165 | 0,886621  | 2,22106       | -1,14626      | 0,251686   | 1          | no  |
| elfA | ChrVIII_A_nidulans_FGSC_A4:2322291-233046  | WT_5hasex | WT_veg | OK     | 403,654  | 1663,98   | 2,04345       | -3,89074      | 9,994E-05  | 0,00109471 | yes |
| elys | ChrIII_A_nidulans_FGSC_A4:1574075-1575157  | WT_5hasex | WT_veg | OK     | 44,5498  | 62,8512   | 0,496522      | -0,975234     | 0,329444   | 0,605972   | no  |
| enaA | ChrI_A_nidulans_FGSC_A4:2709934-2713753    | WT_5hasex | WT_veg | OK     | 9,0432   | 12,591    | 0,477493      | -0,797127     | 0,425377   | 0,692966   | no  |
| enaB | ChrVII_A_nidulans_FGSC_A4:1406950-1410237  | WT_5hasex | WT_veg | OK     | 1,95435  | 12,8047   | 2,71191       | -3,63579      | 0,00027713 | 0,00263702 | yes |
| enaC | ChrIV_A_nidulans_FGSC_A4:2311466-2314924   | WT_5hasex | WT_veg | OK     | 14,7113  | 21,1302   | 0,52238       | -1,01857      | 0,308405   | 0,584505   | no  |
| engA | ChrVIII_A_nidulans_FGSC_A4:3449867-3453075 | WT_5hasex | WT_veg | OK     | 83,0307  | 77,4146   | -0,10104      | 0,206262      | 0,836586   | 0,935068   | no  |
| esdC | ChrVI_A_nidulans_FGSC_A4:375209-377044     | WT_5hasex | WT_veg | OK     | 489,129  | 3271,67   | 2,74174       | -3,65006      | 0,00026217 | 0,00251989 | yes |
| exgA | ChrVIII_A_nidulans_FGSC_A4:802474-804821   | WT_5hasex | WT_veg | NOTEST | 0,751584 | 0         | -1.79769e+308 | -1.79769e+308 | 0,0410847  | 1          | no  |
| exgB | ChrII_A_nidulans_FGSC_A4:3084070-3085462   | WT_5hasex | WT_veg | NOTEST | 1,19597  | 1,00269   | -0,25431      | 0,208525      | 0,834819   | 1          | no  |
| exgC | ChrII_A_nidulans_FGSC_A4:2228421-2229768   | WT_5hasex | WT_veg | OK     | 11,3581  | 22,3227   | 0,974788      | -1,63981      | 0,101044   | 0,291615   | no  |
| exgD | ChrIV_A_nidulans_FGSC_A4:1862794-1865566   | WT_5hasex | WT_veg | OK     | 18,5052  | 35,6646   | 0,946563      | -1,90877      | 0,056292   | 0,192988   | no  |
| exgE | ChrVII_A_nidulans_FGSC_A4:343535-345286    | WT_5hasex | WT_veg | NOTEST | 0        | 0         | 0             | 0             | 1          | 1          | no  |
| faaA | ChrI_A_nidulans_FGSC_A4:1507962-1510775    | WT_5hasex | WT_veg | OK     | 128,005  | 398,802   | 1,63947       | -3,10021      | 0,00193382 | 0,0135712  | yes |
| faaB | ChrII_A_nidulans_FGSC_A4:1367400-1369853   | WT_5hasex | WT_veg | OK     | 26,4838  | 36,1196   | 0,447672      | -0,910498     | 0,36256    | 0,637353   | no  |
| fabM | ChrII_A_nidulans_FGSC_A4:2376172-2378756   | WT_5hasex | WT_veg | OK     | 55,1762  | 214,153   | 1,95652       | -3,9834       | 6,7937E-05 | 0,00078311 | yes |
| facA | ChrV_A_nidulans_FGSC_A4:2169492-2172539    | WT_5hasex | WT_veg | OK     | 79,94    | 140,861   | 0,817284      | -1,60203      | 0,109149   | 0,307793   | no  |
| facB | ChrVIII_A_nidulans_FGSC_A4:2782107-2785113 | WT_5hasex | WT_veg | OK     | 63,8289  | 176,097   | 1,46409       | -2,93077      | 0,00338127 | 0,0216212  | yes |
| facC | ChrVIII_A_nidulans_FGSC_A4:1645648-1648234 | WT_5hasex | WT_veg | OK     | 46,5983  | 123,271   | 1,40349       | -2,85944      | 0,00424388 | 0,0260591  | yes |
| fadA | ChrVIII_A_nidulans_FGSC_A4:2883465-2885283 | WT_5hasex | WT_veg | OK     | 49,2958  | 135,693   | 1,46081       | -3,04307      | 0,00234176 | 0,015914   | yes |
| faeC | ChrV_A_nidulans_FGSC_A4:3323238-3324051    | WT_5hasex | WT_veg | NOTEST | 0,294749 | 0,787156  | 1,41716       | -0,614201     | 0,539082   | 1          | no  |
| fahA | ChrVII_A_nidulans_FGSC_A4:2183535-2184878  | WT_5hasex | WT_veg | OK     | 24,6495  | 48,8933   | 0,988076      | -1,84597      | 0,0648961  | 0,213691   | no  |
| fal1 | ChrII_A_nidulans_FGSC_A4:507226-509355     | WT_5hasex | WT_veg | OK     | 33,5311  | 77,705    | 1,21251       | -2,49852      | 0,0124714  | 0,0620159  | no  |
| faoA | ChrII_A_nidulans_FGSC_A4:822117-823880     | WT_5hasex | WT_veg | OK     | 45,8691  | 810,519   | 4,14325       | -6,9044       | 5,0417E-12 | 2,5428E-10 | yes |
| farA | ChrIV_A_nidulans_FGSC_A4:1192119-1195682   | WT_5hasex | WT_veg | OK     | 18,9513  | 25,582    | 0,432832      | -0,878632     | 0,379601   | 0,654079   | no  |
| farB | ChrVII_A_nidulans_FGSC_A4:743869-746553    | WT_5hasex | WT_veg | OK     | 10,3627  | 16,8897   | 0,704739      | -1,31892      | 0,187196   | 0,43668    | no  |
| fasA | ChrVIII_A_nidulans_FGSC_A4:532852-538683   | WT_5hasex | WT_veg | OK     | 138,672  | 805,79    | 2,53873       | -4,10991      | 3,9582E-05 | 0,00048852 | yes |
| fasB | ChrVIII_A_nidulans_FGSC_A4:540287-546767   | WT_5hasex | WT_veg | OK     | 182,288  | 746,153   | 2,03325       | -3,12539      | 0,00177569 | 0,0126615  | yes |
| fatA | ChrV_A_nidulans_FGSC_A4:1445106-1447127    | WT_5hasex | WT_veg | OK     | 7,10036  | 8,74694   | 0,300888      | -0,499153     | 0,617671   | 0,823314   | no  |
| fatB | ChrI_A_nidulans_FGSC_A4:1937275-1939352    | WT_5hasex | WT_veg | OK     | 7,07715  | 12,0844   | 0,771907      | -1,2815       | 0,200018   | 0,454427   | no  |
| fatC | ChrI_A_nidulans_FGSC_A4:2729702-2731769    | WT_5hasex | WT_veg | NOTEST | 0        | 0,0926416 | 1.79769e+308  | 1.79769e+308  | 0,309884   | 1          | no  |
| fatD | ChrIII_A_nidulans_FGSC_A4:2159441-2161178  | WT_5hasex | WT_veg | OK     | 68,3228  | 110,365   | 0,691843      | -1,35491      | 0,175447   | 0,41982    | no  |

## Supplementary table 1

|      |                                            |           |        |        |          |         |               |               |            |            |     |
|------|--------------------------------------------|-----------|--------|--------|----------|---------|---------------|---------------|------------|------------|-----|
| fbaA | ChrVI_A_nidulans_FGSC_A4:2525617-2527251   | WT_5hasex | WT_veg | OK     | 1007,26  | 3865,15 | 1,94009       | -3,03955      | 0,00236931 | 0,0160825  | yes |
| fbpZ | ChrI_A_nidulans_FGSC_A4:2974137-2976004    | WT_5hasex | WT_veg | OK     | 114,336  | 518,11  | 2,17998       | -4,34369      | 1,4011E-05 | 0,00019454 | yes |
| fcyB | ChrI_A_nidulans_FGSC_A4:1491753-1493358    | WT_5hasex | WT_veg | OK     | 125,574  | 119,916 | -0,0665105    | 0,129875      | 0,896665   | 0,960535   | no  |
| fhbA | ChrIV_A_nidulans_FGSC_A4:795898-797379     | WT_5hasex | WT_veg | OK     | 615,664  | 143,344 | -2,10266      | 3,29382       | 0,00098838 | 0,00777087 | yes |
| fhbB | ChrII_A_nidulans_FGSC_A4:3904791-3906076   | WT_5hasex | WT_veg | OK     | 2,76432  | 20,3773 | 2,88197       | -4,03569      | 5,4442E-05 | 0,00064501 | yes |
| fhdA | ChrVI_A_nidulans_FGSC_A4:2479332-2480415   | WT_5hasex | WT_veg | OK     | 23,0324  | 43,445  | 0,915521      | -1,68324      | 0,0923279  | 0,273884   | no  |
| fhpA | ChrIII_A_nidulans_FGSC_A4:1782644-1784126  | WT_5hasex | WT_veg | OK     | 2,32431  | 18,2306 | 2,97148       | -4,03492      | 5,4621E-05 | 0,00064684 | yes |
| fimA | ChrI_A_nidulans_FGSC_A4:2196241-2199038    | WT_5hasex | WT_veg | OK     | 224,417  | 497,632 | 1,1489        | -2,00917      | 0,0445196  | 0,163324   | no  |
| fksA | ChrII_A_nidulans_FGSC_A4:3255413-3261962   | WT_5hasex | WT_veg | OK     | 249,649  | 632,326 | 1,34077       | -2,17007      | 0,0300017  | 0,12142    | no  |
| flbA | ChrI_A_nidulans_FGSC_A4:1878216-1881495    | WT_5hasex | WT_veg | OK     | 29,8867  | 40,1426 | 0,42563       | -0,883061     | 0,377203   | 0,651934   | no  |
| flbB | ChrIV_A_nidulans_FGSC_A4:1889783-1891752   | WT_5hasex | WT_veg | OK     | 107,56   | 153,266 | 0,51089       | -1,0301       | 0,302962   | 0,578827   | no  |
| flbC | ChrVII_A_nidulans_FGSC_A4:3880775-3882058  | WT_5hasex | WT_veg | OK     | 213,506  | 223,943 | 0,0688566     | -0,129608     | 0,896877   | 0,960655   | no  |
| flbD | ChrVIII_A_nidulans_FGSC_A4:4060949-4062201 | WT_5hasex | WT_veg | OK     | 61,2506  | 103,078 | 0,750949      | -1,54386      | 0,122621   | 0,332222   | no  |
| flbE | ChrVIII_A_nidulans_FGSC_A4:2681233-2683106 | WT_5hasex | WT_veg | OK     | 42,5188  | 101,557 | 1,25611       | -2,3269       | 0,0199706  | 0,0890712  | no  |
| fluG | ChrIII_A_nidulans_FGSC_A4:891151-893853    | WT_5hasex | WT_veg | OK     | 25,3928  | 36,2927 | 0,515259      | -1,03821      | 0,299172   | 0,574593   | no  |
| fmdS | ChrIII_A_nidulans_FGSC_A4:1618463-1619929  | WT_5hasex | WT_veg | OK     | 112,286  | 198,418 | 0,821374      | -1,33459      | 0,182011   | 0,42915    | no  |
| foxA | ChrIV_A_nidulans_FGSC_A4:986987-990129     | WT_5hasex | WT_veg | OK     | 28,0532  | 33,0795 | 0,237771      | -0,492957     | 0,622043   | 0,825416   | no  |
| fphA | ChrVII_A_nidulans_FGSC_A4:141220-145309    | WT_5hasex | WT_veg | OK     | 30,3454  | 84,3266 | 1,47451       | -2,99875      | 0,00271091 | 0,0179546  | yes |
| fprA | ChrII_A_nidulans_FGSC_A4:3653784-3654550   | WT_5hasex | WT_veg | OK     | 632,684  | 1194,13 | 0,916403      | -1,81374      | 0,0697173  | 0,224806   | no  |
| freA | ChrIV_A_nidulans_FGSC_A4:2306087-2308130   | WT_5hasex | WT_veg | OK     | 29,6152  | 43,4779 | 0,553945      | -1,10638      | 0,268564   | 0,540324   | no  |
| furA | ChrVIII_A_nidulans_FGSC_A4:2862300-2864202 | WT_5hasex | WT_veg | OK     | 48,4088  | 34,4055 | -0,492631     | 0,985219      | 0,324516   | 0,601031   | no  |
| furB | ChrII_A_nidulans_FGSC_A4:1932760-1934780   | WT_5hasex | WT_veg | NOTEST | 0,964958 | 2,20255 | 1,19064       | -1,28449      | 0,198971   | 1          | no  |
| furC | ChrVI_A_nidulans_FGSC_A4:994928-996800     | WT_5hasex | WT_veg | OK     | 14,4558  | 22,1225 | 0,613863      | -1,03278      | 0,301708   | 0,577496   | no  |
| furE | ChrV_A_nidulans_FGSC_A4:421317-423114      | WT_5hasex | WT_veg | OK     | 56,8626  | 64,4974 | 0,181763      | -0,29468      | 0,768238   | 0,904901   | no  |
| furF | ChrVIII_A_nidulans_FGSC_A4:293087-295155   | WT_5hasex | WT_veg | OK     | 27,325   | 65,4352 | 1,25984       | -2,25289      | 0,0242664  | 0,103011   | no  |
| furG | ChrII_A_nidulans_FGSC_A4:319245-322009     | WT_5hasex | WT_veg | OK     | 3,50917  | 11,8956 | 1,76122       | -2,23769      | 0,025241   | 0,106282   | no  |
| gabA | ChrVI_A_nidulans_FGSC_A4:2236905-2239540   | WT_5hasex | WT_veg | OK     | 45,37    | 59,3579 | 0,3877        | -0,732264     | 0,464008   | 0,723271   | no  |
| galA | ChrV_A_nidulans_FGSC_A4:1878967-1880080    | WT_5hasex | WT_veg | OK     | 3,92976  | 3,1087  | -0,338129     | 0,396855      | 0,691474   | 0,864459   | no  |
| galD | ChrI_A_nidulans_FGSC_A4:1004458-1005965    | WT_5hasex | WT_veg | OK     | 58,1454  | 132,112 | 1,18402       | -2,36173      | 0,0181899  | 0,0827708  | no  |
| galE | ChrIII_A_nidulans_FGSC_A4:453594-455270    | WT_5hasex | WT_veg | OK     | 37,7089  | 55,2515 | 0,551106      | -1,08046      | 0,279937   | 0,553474   | no  |
| galF | ChrVI_A_nidulans_FGSC_A4:295507-298010     | WT_5hasex | WT_veg | OK     | 570,761  | 1309,21 | 1,19774       | -2,02575      | 0,0427908  | 0,158434   | no  |
| ganA | ChrVI_A_nidulans_FGSC_A4:1875982-1877287   | WT_5hasex | WT_veg | OK     | 34,6498  | 54,8949 | 0,663827      | -1,29018      | 0,196987   | 0,450352   | no  |
| ganB | ChrVIII_A_nidulans_FGSC_A4:1793439-1794810 | WT_5hasex | WT_veg | OK     | 70,7047  | 134,639 | 0,929216      | -1,82667      | 0,0677489  | 0,220275   | no  |
| gapA | ChrIII_A_nidulans_FGSC_A4:332960-335410    | WT_5hasex | WT_veg | OK     | 27,0138  | 44,8002 | 0,72981       | -1,39767      | 0,162213   | 0,398439   | no  |
| gatA | ChrVII_A_nidulans_FGSC_A4:3321499-3323511  | WT_5hasex | WT_veg | OK     | 218,892  | 231,127 | 0,0784661     | -0,144252     | 0,885301   | 0,956389   | no  |
| gcnE | ChrII_A_nidulans_FGSC_A4:3567624-3569139   | WT_5hasex | WT_veg | OK     | 17,5196  | 49,2324 | 1,49064       | -2,67666      | 0,00743604 | 0,0411037  | yes |
| gcpB | ChrI_A_nidulans_FGSC_A4:1949464-1952267    | WT_5hasex | WT_veg | OK     | 15,8214  | 21,3406 | 0,431717      | -0,844275     | 0,398516   | 0,671069   | no  |
| gcpC | ChrIII_A_nidulans_FGSC_A4:726765-729801    | WT_5hasex | WT_veg | OK     | 19,0732  | 18,9534 | -0,0090881    | 0,0184303     | 0,985296   | 0,994532   | no  |
| gcpD | ChrVII_A_nidulans_FGSC_A4:3111558-3114373  | WT_5hasex | WT_veg | OK     | 13,4723  | 20,6837 | 0,6185        | -1,21986      | 0,222516   | 0,484227   | no  |
| gcpE | ChrII_A_nidulans_FGSC_A4:811535-814299     | WT_5hasex | WT_veg | OK     | 10,1465  | 15,8648 | 0,64485       | -1,20441      | 0,228432   | 0,491456   | no  |
| gcpF | ChrVIII_A_nidulans_FGSC_A4:1826606-1829517 | WT_5hasex | WT_veg | OK     | 6,71325  | 8,72532 | 0,378196      | -0,661521     | 0,508279   | 0,755105   | no  |
| gdhA | ChrIII_A_nidulans_FGSC_A4:2217812-2219579  | WT_5hasex | WT_veg | OK     | 716,425  | 613,932 | -0,222737     | 0,373594      | 0,708707   | 0,874279   | no  |
| gdiA | ChrI_A_nidulans_FGSC_A4:1870343-1872261    | WT_5hasex | WT_veg | OK     | 220,724  | 281,217 | 0,349445      | -0,673231     | 0,500801   | 0,750259   | no  |
| gela | ChrIV_A_nidulans_FGSC_A4:2286360-2288221   | WT_5hasex | WT_veg | OK     | 932,153  | 1536,91 | 0,721389      | -1,18646      | 0,235442   | 0,500753   | no  |
| gelB | ChrVIII_A_nidulans_FGSC_A4:3174526-3176539 | WT_5hasex | WT_veg | OK     | 100,72   | 217,626 | 1,1115        | -2,19305      | 0,0283041  | 0,11592    | no  |
| gelC | ChrII_A_nidulans_FGSC_A4:3249001-3251282   | WT_5hasex | WT_veg | OK     | 114,315  | 41,4831 | -1,46242      | 2,91564       | 0,00354965 | 0,0225083  | yes |
| gelD | ChrVII_A_nidulans_FGSC_A4:348173-350191    | WT_5hasex | WT_veg | OK     | 341,63   | 9,37753 | -5,18708      | 6,774         | 1,2527E-11 | 5,8767E-10 | yes |
| gelE | ChrIV_A_nidulans_FGSC_A4:1779249-1781196   | WT_5hasex | WT_veg | OK     | 371,904  | 530,165 | 0,511512      | -0,920286     | 0,357423   | 0,632632   | no  |
| gfaA | ChrV_A_nidulans_FGSC_A4:1688163-1691130    | WT_5hasex | WT_veg | OK     | 426,7    | 577,494 | 0,436584      | -0,762879     | 0,445536   | 0,708751   | no  |
| gfdA | ChrVIII_A_nidulans_FGSC_A4:3827963-3829778 | WT_5hasex | WT_veg | OK     | 93,2449  | 232,824 | 1,32014       | -2,71442      | 0,00663909 | 0,0375339  | yes |
| gfdB | ChrI_A_nidulans_FGSC_A4:3189570-3190910    | WT_5hasex | WT_veg | OK     | 23,9951  | 173,683 | 2,85564       | -5,29621      | 1,1823E-07 | 2,7054E-06 | yes |
| glaA | ChrVII_A_nidulans_FGSC_A4:503663-505829    | WT_5hasex | WT_veg | OK     | 42,6843  | 28,5328 | -0,511084     | 0,917463      | 0,3589     | 0,633811   | no  |
| glaB | ChrIV_A_nidulans_FGSC_A4:63625-65705       | WT_5hasex | WT_veg | OK     | 3,7596   | 0       | -1.79769e+308 | -1.79769e+308 | 0,00911834 | 0,0484275  | yes |

## Supplementary table 1

|       |                                            |           |        |        |          |         |           |            |            |            |     |
|-------|--------------------------------------------|-----------|--------|--------|----------|---------|-----------|------------|------------|------------|-----|
| gldB  | ChrV_A_nidulans_FGSC_A4:2398938-2400534    | WT_5hasex | WT_veg | OK     | 653,465  | 2056,71 | 1,65416   | -2,79629   | 0,00516924 | 0,0305388  | yes |
| gle1  | ChrVIII_A_nidulans_FGSC_A4:1352130-1353725 | WT_5hasex | WT_veg | OK     | 17,0632  | 22,1693 | 0,377679  | -0,704151  | 0,481339   | 0,736115   | no  |
| glikA | ChrIII_A_nidulans_FGSC_A4:3118546-3120071  | WT_5hasex | WT_veg | OK     | 350,204  | 935,901 | 1,41816   | -2,64359   | 0,00820317 | 0,0444592  | yes |
| glnA  | ChrII_A_nidulans_FGSC_A4:1916041-1917905   | WT_5hasex | WT_veg | OK     | 2226,37  | 4294,49 | 0,947792  | -1,34953   | 0,177168   | 0,422151   | no  |
| glrA  | ChrVIII_A_nidulans_FGSC_A4:2028749-2030740 | WT_5hasex | WT_veg | OK     | 124,609  | 289,819 | 1,21774   | -2,47682   | 0,0132557  | 0,0650641  | no  |
| gltA  | ChrV_A_nidulans_FGSC_A4:1249551-1256565    | WT_5hasex | WT_veg | OK     | 120,256  | 207,178 | 0,784763  | -1,4031    | 0,160588   | 0,396212   | no  |
| gly1  | Contig-mt188_A_nidulans_FGSC_A4:4868-4940  | WT_5hasex | WT_veg | NOTEST | 0        | 0       | 0         | 0          | 1          | 1          | no  |
| gly2  | Contig-mt188_A_nidulans_FGSC_A4:4743-4814  | WT_5hasex | WT_veg | NOTEST | 0        | 0       | 0         | 0          | 1          | 1          | no  |
| gmdA  | ChrII_A_nidulans_FGSC_A4:2515263-2517623   | WT_5hasex | WT_veg | OK     | 75,2998  | 77,7867 | 0,0468771 | -0,0749213 | 0,940277   | 0,977599   | no  |
| gmdC  | ChrVI_A_nidulans_FGSC_A4:2662935-2664741   | WT_5hasex | WT_veg | OK     | 4,78551  | 14,4301 | 1,59234   | -2,40835   | 0,0160246  | 0,0752754  | no  |
| gmtA  | ChrIII_A_nidulans_FGSC_A4:2604118-2605585  | WT_5hasex | WT_veg | OK     | 65,2059  | 163,738 | 1,32831   | -2,73249   | 0,00628572 | 0,0358924  | yes |
| gmtB  | ChrVIII_A_nidulans_FGSC_A4:214143-215449   | WT_5hasex | WT_veg | OK     | 2,9952   | 10,2801 | 1,77913   | -2,30217   | 0,0213256  | 0,0936069  | no  |
| gnaA  | ChrIII_A_nidulans_FGSC_A4:3061741-3062661  | WT_5hasex | WT_veg | OK     | 151,79   | 261,645 | 0,785536  | -1,62661   | 0,10382    | 0,297419   | no  |
| gpdA  | ChrII_A_nidulans_FGSC_A4:580129-581937     | WT_5hasex | WT_veg | OK     | 4489,38  | 7458,17 | 0,732305  | -0,777457  | 0,436889   | 0,701926   | no  |
| gpdC  | ChrVII_A_nidulans_FGSC_A4:4435976-4437309  | WT_5hasex | WT_veg | OK     | 449,625  | 771,351 | 0,778667  | -1,30884   | 0,190587   | 0,441437   | no  |
| gpgA  | ChrVI_A_nidulans_FGSC_A4:2948436-2949317   | WT_5hasex | WT_veg | OK     | 128,659  | 327,561 | 1,34821   | -2,80907   | 0,00496843 | 0,0295859  | yes |
| gppA  | ChrVIII_A_nidulans_FGSC_A4:1173304-1174476 | WT_5hasex | WT_veg | OK     | 86,7382  | 184,058 | 1,08542   | -2,24085   | 0,0250355  | 0,105553   | no  |
| gprC  | ChrII_A_nidulans_FGSC_A4:3127715-3129185   | WT_5hasex | WT_veg | OK     | 26,6114  | 73,7008 | 1,46964   | -2,89176   | 0,00383085 | 0,0239562  | yes |
| gprD  | ChrVI_A_nidulans_FGSC_A4:876030-877581     | WT_5hasex | WT_veg | OK     | 54,848   | 22,8979 | -1,26022  | 2,19716    | 0,0280093  | 0,115036   | no  |
| gprE  | ChrVI_A_nidulans_FGSC_A4:134873-137479     | WT_5hasex | WT_veg | OK     | 44,7515  | 111,047 | 1,31116   | -2,70864   | 0,00675596 | 0,0380714  | yes |
| gprH  | ChrII_A_nidulans_FGSC_A4:1316426-1317786   | WT_5hasex | WT_veg | OK     | 33,5581  | 36,4616 | 0,119715  | -0,228306  | 0,819408   | 0,927661   | no  |
| gprI  | ChrV_A_nidulans_FGSC_A4:195341-196371      | WT_5hasex | WT_veg | OK     | 0,526418 | 8,06019 | 3,93653   | -3,13091   | 0,00174263 | 0,0124597  | yes |
| gprJ  | ChrV_A_nidulans_FGSC_A4:1894600-1896179    | WT_5hasex | WT_veg | OK     | 22,3198  | 173,037 | 2,95469   | -5,47607   | 4,3487E-08 | 1,0961E-06 | yes |
| gprK  | ChrIV_A_nidulans_FGSC_A4:2716143-2718306   | WT_5hasex | WT_veg | OK     | 187,095  | 347,716 | 0,894138  | -1,76392   | 0,0777455  | 0,242978   | no  |
| gprM  | ChrI_A_nidulans_FGSC_A4:2826749-2828761    | WT_5hasex | WT_veg | OK     | 9,15559  | 22,3055 | 1,28467   | -2,14997   | 0,0315579  | 0,126246   | no  |
| gprN  | ChrV_A_nidulans_FGSC_A4:2571802-2573289    | WT_5hasex | WT_veg | OK     | 5,91672  | 1,65738 | -1,83589  | 2,01058    | 0,0443702  | 0,162867   | no  |
| gprO  | ChrIII_A_nidulans_FGSC_A4:513196-514547    | WT_5hasex | WT_veg | OK     | 15,6717  | 26,4232 | 0,753644  | -1,26976   | 0,20417    | 0,460353   | no  |
| gprP  | ChrV_A_nidulans_FGSC_A4:1300091-1301870    | WT_5hasex | WT_veg | OK     | 27,3327  | 39,1973 | 0,520128  | -1,03871   | 0,298937   | 0,574269   | no  |
| gpxA  | ChrVI_A_nidulans_FGSC_A4:2616847-2617800   | WT_5hasex | WT_veg | OK     | 221,58   | 575,091 | 1,37596   | -2,75067   | 0,00594728 | 0,0342359  | yes |
| grrA  | ChrII_A_nidulans_FGSC_A4:1769493-1771710   | WT_5hasex | WT_veg | OK     | 103,297  | 194,78  | 0,915051  | -1,87539   | 0,0607393  | 0,204056   | no  |
| gsdA  | ChrVI_A_nidulans_FGSC_A4:2183691-2186179   | WT_5hasex | WT_veg | OK     | 365,803  | 1090,39 | 1,57571   | -2,78888   | 0,005289   | 0,031113   | yes |
| gst3  | ChrVII_A_nidulans_FGSC_A4:3103134-3104512  | WT_5hasex | WT_veg | OK     | 87,4923  | 195,741 | 1,16172   | -2,37172   | 0,0177055  | 0,0811445  | no  |
| gstA  | ChrIII_A_nidulans_FGSC_A4:601762-602876    | WT_5hasex | WT_veg | OK     | 131,116  | 265,885 | 1,01996   | -2,12129   | 0,033897   | 0,133384   | no  |
| gstB  | ChrI_A_nidulans_FGSC_A4:1467522-1468493    | WT_5hasex | WT_veg | OK     | 36,3429  | 177,143 | 2,28517   | -3,75865   | 0,00017083 | 0,00174063 | yes |
| gudA  | ChrIII_A_nidulans_FGSC_A4:3385986-3386945  | WT_5hasex | WT_veg | OK     | 25,8641  | 31,1239 | 0,267071  | -0,481086  | 0,630455   | 0,830767   | no  |
| gudB  | ChrII_A_nidulans_FGSC_A4:1823030-1830133   | WT_5hasex | WT_veg | OK     | 5,99048  | 17,1796 | 1,51996   | -2,19374   | 0,0282544  | 0,115799   | no  |
| gudC  | ChrI_A_nidulans_FGSC_A4:2747113-2748123    | WT_5hasex | WT_veg | OK     | 197,776  | 277,071 | 0,486391  | -0,969082  | 0,332504   | 0,608884   | no  |
| gukA  | ChrII_A_nidulans_FGSC_A4:3516468-3517583   | WT_5hasex | WT_veg | OK     | 39,2802  | 149,752 | 1,9307    | -3,83597   | 0,00012507 | 0,00133442 | yes |
| hacA  | ChrVIII_A_nidulans_FGSC_A4:511615-513283   | WT_5hasex | WT_veg | OK     | 227,803  | 271,044 | 0,250742  | -0,493914  | 0,621367   | 0,825056   | no  |
| hadA  | ChrIV_A_nidulans_FGSC_A4:1336216-1337385   | WT_5hasex | WT_veg | OK     | 78,158   | 123,047 | 0,654747  | -1,34376   | 0,179026   | 0,424667   | no  |
| halA  | ChrIII_A_nidulans_FGSC_A4:2662463-2664953  | WT_5hasex | WT_veg | OK     | 163,964  | 914,486 | 2,47958   | -4,6797    | 2,873E-06  | 4,7239E-05 | yes |
| hapB  | ChrIV_A_nidulans_FGSC_A4:1899822-1903570   | WT_5hasex | WT_veg | OK     | 62,9821  | 99,4468 | 0,658982  | -1,34584   | 0,178354   | 0,423647   | no  |
| hapC  | ChrII_A_nidulans_FGSC_A4:2282167-2284090   | WT_5hasex | WT_veg | OK     | 70,4499  | 128,095 | 0,86254   | -1,73136   | 0,0833881  | 0,25524    | no  |
| hapE  | ChrI_A_nidulans_FGSC_A4:2280414-2284598    | WT_5hasex | WT_veg | OK     | 141,644  | 367,392 | 1,37505   | -2,80054   | 0,00510174 | 0,030232   | yes |
| hapX  | ChrII_A_nidulans_FGSC_A4:1278336-1279764   | WT_5hasex | WT_veg | OK     | 12,3436  | 17,175  | 0,476554  | -0,827912  | 0,407721   | 0,678      | no  |
| hbrA  | ChrVII_A_nidulans_FGSC_A4:3860764-3863076  | WT_5hasex | WT_veg | OK     | 34,7507  | 66,1084 | 0,927791  | -1,90798   | 0,0563939  | 0,193281   | no  |
| hbrB  | ChrI_A_nidulans_FGSC_A4:2966687-2969482    | WT_5hasex | WT_veg | OK     | 10,171   | 14,0568 | 0,46681   | -0,876793  | 0,380599   | 0,654922   | no  |
| hdaA  | ChrII_A_nidulans_FGSC_A4:582700-585907     | WT_5hasex | WT_veg | OK     | 27,4077  | 37,2246 | 0,441677  | -0,902219  | 0,36694    | 0,641867   | no  |
| hemA  | ChrVII_A_nidulans_FGSC_A4:3435363-3437374  | WT_5hasex | WT_veg | OK     | 47,7329  | 102,161 | 1,0978    | -2,20688   | 0,0273225  | 0,112825   | no  |
| hepA  | ChrVII_A_nidulans_FGSC_A4:2216123-2217515  | WT_5hasex | WT_veg | OK     | 61,6658  | 119,552 | 0,95509   | -1,96412   | 0,0495159  | 0,176392   | no  |
| hetC  | ChrVII_A_nidulans_FGSC_A4:3086253-3088950  | WT_5hasex | WT_veg | OK     | 24,5411  | 57,8815 | 1,2379    | -2,541     | 0,0110537  | 0,0563815  | no  |
| hexA  | ChrIII_A_nidulans_FGSC_A4:1288673-1291027  | WT_5hasex | WT_veg | OK     | 1134,19  | 2678,61 | 1,23983   | -1,77002   | 0,0767233  | 0,240674   | no  |
| hhoA  | ChrVI_A_nidulans_FGSC_A4:2872024-2873568   | WT_5hasex | WT_veg | OK     | 348,68   | 823,098 | 1,23916   | -2,44258   | 0,0145827  | 0,0700233  | no  |

## Supplementary table 1

|        |                                            |           |        |        |          |          |               |               |            |            |     |
|--------|--------------------------------------------|-----------|--------|--------|----------|----------|---------------|---------------|------------|------------|-----|
| hhtA   | ChrVIII_A_nidulans_FGSC_A4:2630366-2631307 | WT_5hasex | WT_veg | OK     | 3153,4   | 6248,91  | 0,986696      | -1,48132      | 0,138523   | 0,360009   | no  |
| hisB   | ChrI_A_nidulans_FGSC_A4:2403958-2404810    | WT_5hasex | WT_veg | OK     | 62,178   | 111,861  | 0,847225      | -1,65608      | 0,0977047  | 0,284598   | no  |
| hisHF  | ChrIV_A_nidulans_FGSC_A4:1520618-1522588   | WT_5hasex | WT_veg | OK     | 91,9219  | 233,906  | 1,34745       | -2,75544      | 0,00586132 | 0,0338377  | yes |
| hk2    | ChrII_A_nidulans_FGSC_A4:294244-296249     | WT_5hasex | WT_veg | OK     | 15,1454  | 53,2045  | 1,81267       | -3,50406      | 0,00045822 | 0,00404171 | yes |
| hlyA   | ChrV_A_nidulans_FGSC_A4:3303302-3305170    | WT_5hasex | WT_veg | NOTEST | 0,12742  | 0,447659 | 1,81281       | -0,797422     | 0,425206   | 1          | no  |
| hmgA   | ChrVII_A_nidulans_FGSC_A4:2185269-2186925  | WT_5hasex | WT_veg | OK     | 95,6932  | 155,45   | 0,699967      | -1,38366      | 0,166464   | 0,405233   | no  |
| hogA   | ChrVIII_A_nidulans_FGSC_A4:1787245-1789386 | WT_5hasex | WT_veg | OK     | 573,956  | 2509,45  | 2,12836       | -3,51604      | 0,00043803 | 0,00388516 | yes |
| hosA   | ChrII_A_nidulans_FGSC_A4:2991993-2993442   | WT_5hasex | WT_veg | OK     | 44,0809  | 59,3009  | 0,427899      | -0,827342     | 0,408043   | 0,678243   | no  |
| hosB   | ChrIV_A_nidulans_FGSC_A4:1300346-1303724   | WT_5hasex | WT_veg | OK     | 8,20474  | 11,1277  | 0,439632      | -0,816039     | 0,414478   | 0,683592   | no  |
| hpdA   | ChrVII_A_nidulans_FGSC_A4:2188089-2189579  | WT_5hasex | WT_veg | OK     | 104,036  | 182,732  | 0,812641      | -1,52212      | 0,127979   | 0,341672   | no  |
| hscA   | ChrVII_A_nidulans_FGSC_A4:681184-683748    | WT_5hasex | WT_veg | OK     | 365,331  | 1000,09  | 1,45286       | -2,46486      | 0,0137068  | 0,0666796  | no  |
| hsf1   | ChrII_A_nidulans_FGSC_A4:561738-564189     | WT_5hasex | WT_veg | OK     | 19,6778  | 34,6964  | 0,818215      | -1,61974      | 0,105289   | 0,300278   | no  |
| hsp104 | ChrVIII_A_nidulans_FGSC_A4:2252755-2255831 | WT_5hasex | WT_veg | OK     | 568,042  | 2032,7   | 1,83933       | -2,7206       | 0,0065164  | 0,0369919  | yes |
| hsp30  | ChrVII_A_nidulans_FGSC_A4:4244549-4245508  | WT_5hasex | WT_veg | OK     | 3705,67  | 4891,94  | 0,400672      | -0,449935     | 0,652758   | 0,843291   | no  |
| hsp70  | ChrV_A_nidulans_FGSC_A4:1233513-1235891    | WT_5hasex | WT_veg | OK     | 1662,18  | 4619,97  | 1,47481       | -1,6892       | 0,091181   | 0,271327   | no  |
| hsp90  | ChrII_A_nidulans_FGSC_A4:1334553-1337240   | WT_5hasex | WT_veg | OK     | 607,295  | 1535,12  | 1,33788       | -2,11043      | 0,0348213  | 0,136138   | no  |
| hstA   | ChrII_A_nidulans_FGSC_A4:1312608-1313914   | WT_5hasex | WT_veg | OK     | 23,7032  | 56,6518  | 1,25704       | -2,38678      | 0,0169965  | 0,0787488  | no  |
| hulA   | ChrVIII_A_nidulans_FGSC_A4:787321-790823   | WT_5hasex | WT_veg | OK     | 77,9288  | 217,624  | 1,48161       | -3,00134      | 0,00268792 | 0,0178294  | yes |
| hulB   | ChrVIII_A_nidulans_FGSC_A4:3534759-3538372 | WT_5hasex | WT_veg | OK     | 17,0161  | 27,4266  | 0,688673      | -1,36882      | 0,171056   | 0,412596   | no  |
| hulC   | ChrVII_A_nidulans_FGSC_A4:1778419-1784648  | WT_5hasex | WT_veg | OK     | 27,3083  | 61,3672  | 1,16813       | -2,39059      | 0,0168212  | 0,078151   | no  |
| hulD   | ChrVII_A_nidulans_FGSC_A4:2117638-2121206  | WT_5hasex | WT_veg | OK     | 24,8921  | 26,6012  | 0,0958054     | -0,198683     | 0,842511   | 0,937733   | no  |
| hulE   | ChrVII_A_nidulans_FGSC_A4:2408555-2421143  | WT_5hasex | WT_veg | OK     | 19,0287  | 68,5255  | 1,84846       | -3,70439      | 0,0002119  | 0,00209311 | yes |
| hulF   | ChrII_A_nidulans_FGSC_A4:2379679-2383397   | WT_5hasex | WT_veg | OK     | 25,0132  | 41,0289  | 0,713947      | -1,4855       | 0,137411   | 0,358203   | no  |
| hxA    | ChrV_A_nidulans_FGSC_A4:2211297-2215583    | WT_5hasex | WT_veg | OK     | 90,7167  | 745,643  | 3,03905       | -5,12625      | 2,9556E-07 | 6,1854E-06 | yes |
| hxB    | ChrVII_A_nidulans_FGSC_A4:1435983-1438647  | WT_5hasex | WT_veg | OK     | 12,2071  | 43,25    | 1,82498       | -3,46795      | 0,00052444 | 0,0045334  | yes |
| hxkA   | ChrIV_A_nidulans_FGSC_A4:1608306-1610025   | WT_5hasex | WT_veg | OK     | 230,159  | 858,294  | 1,89884       | -3,58211      | 0,00034083 | 0,00313851 | yes |
| hxkB   | ChrVI_A_nidulans_FGSC_A4:3294560-3296094   | WT_5hasex | WT_veg | OK     | 1,51945  | 5,1417   | 1,7587        | -2,12534      | 0,0335581  | 0,132348   | no  |
| hxkC   | ChrII_A_nidulans_FGSC_A4:1606910-1608806   | WT_5hasex | WT_veg | OK     | 41,9058  | 33,8941  | -0,306113     | 0,633996      | 0,526083   | 0,7673     | no  |
| hxtA   | ChrI_A_nidulans_FGSC_A4:3582608-3584756    | WT_5hasex | WT_veg | OK     | 7,93285  | 7,02385  | -0,175578     | 0,284066      | 0,77636    | 0,908721   | no  |
| hymA   | ChrVI_A_nidulans_FGSC_A4:1849546-1850948   | WT_5hasex | WT_veg | OK     | 63,1339  | 69,8986  | 0,14685       | -0,288451     | 0,773001   | 0,906944   | no  |
| hypA   | ChrI_A_nidulans_FGSC_A4:2391386-2395969    | WT_5hasex | WT_veg | OK     | 11,4598  | 9,36594  | -0,291081     | 0,579277      | 0,562402   | 0,790346   | no  |
| hypB   | ChrI_A_nidulans_FGSC_A4:2923706-2929969    | WT_5hasex | WT_veg | OK     | 18,5169  | 22,7532  | 0,297226      | -0,617338     | 0,537012   | 0,773685   | no  |
| idpA   | ChrVI_A_nidulans_FGSC_A4:2137245-2139820   | WT_5hasex | WT_veg | OK     | 106,328  | 145,912  | 0,456578      | -0,899488     | 0,368393   | 0,643104   | no  |
| ile    | Contig-mt188_A_nidulans_FGSC_A4:4233-4305  | WT_5hasex | WT_veg | NOTEST | 0        | 0        | 0             | 0             | 1          | 1          | no  |
| ileA   | ChrII_A_nidulans_FGSC_A4:2922952-2925077   | WT_5hasex | WT_veg | OK     | 25,8688  | 65,6172  | 1,34286       | -2,6952       | 0,00703468 | 0,0392788  | yes |
| imeB   | ChrI_A_nidulans_FGSC_A4:774216-776665      | WT_5hasex | WT_veg | OK     | 37,8784  | 64,4609  | 0,76705       | -1,59405      | 0,110925   | 0,311021   | no  |
| inpA   | ChrII_A_nidulans_FGSC_A4:3991242-3995742   | WT_5hasex | WT_veg | NOTEST | 0,08683  | 0,218684 | 1,33258       | -0,841159     | 0,400259   | 1          | no  |
| inpB   | ChrII_A_nidulans_FGSC_A4:3983380-3990409   | WT_5hasex | WT_veg | NOTEST | 0,200368 | 0,222299 | 0,149853      | -0,135066     | 0,89256    | 1          | no  |
| ipnA   | ChrVI_A_nidulans_FGSC_A4:3360449-3361598   | WT_5hasex | WT_veg | OK     | 6,43857  | 2,83227  | -1,18478      | 1,33349       | 0,182372   | 0,429764   | no  |
| ippA   | ChrVI_A_nidulans_FGSC_A4:2217670-2218925   | WT_5hasex | WT_veg | OK     | 393,846  | 387,676  | -0,0227817    | 0,0449522     | 0,964145   | 0,986992   | no  |
| ivdA   | ChrIII_A_nidulans_FGSC_A4:1313102-1314740  | WT_5hasex | WT_veg | OK     | 15,8142  | 40,0175  | 1,33941       | -2,24573      | 0,0247215  | 0,104474   | no  |
| ivoA   | ChrIII_A_nidulans_FGSC_A4:1433761-1438937  | WT_5hasex | WT_veg | NOTEST | 0,773135 | 1,10822  | 0,519452      | -0,683505     | 0,494288   | 1          | no  |
| ivoB   | ChrVIII_A_nidulans_FGSC_A4:4208565-4209844 | WT_5hasex | WT_veg | OK     | 214,457  | 8,3293   | -4,68635      | 6,6609        | 2,7216E-11 | 1,2035E-09 | yes |
| ivoC   | ChrIII_A_nidulans_FGSC_A4:1431691-1433386  | WT_5hasex | WT_veg | OK     | 6,81048  | 0        | -1.79769e+308 | -1.79769e+308 | 0,00527214 | 0,0310347  | yes |
| jlba   | ChrVII_A_nidulans_FGSC_A4:1964062-1965095  | WT_5hasex | WT_veg | OK     | 302,758  | 1629,73  | 2,42839       | -4,7328       | 2,2144E-06 | 3,7566E-05 | yes |
| kapA   | ChrVII_A_nidulans_FGSC_A4:3011826-3014534  | WT_5hasex | WT_veg | OK     | 109,491  | 226,376  | 1,0479        | -2,09236      | 0,0364067  | 0,140651   | no  |
| kapB   | ChrVIII_A_nidulans_FGSC_A4:2106915-2109968 | WT_5hasex | WT_veg | OK     | 47,0837  | 94,3812  | 1,00327       | -2,10078      | 0,03566    | 0,138575   | no  |
| kapG   | ChrVII_A_nidulans_FGSC_A4:3076356-3078368  | WT_5hasex | WT_veg | OK     | 115,878  | 220,408  | 0,927569      | -1,86422      | 0,0622915  | 0,207453   | no  |
| kapI   | ChrV_A_nidulans_FGSC_A4:1899834-1903567    | WT_5hasex | WT_veg | OK     | 72,0124  | 195,828  | 1,44327       | -2,90731      | 0,0036455  | 0,0229992  | yes |
| kapK   | ChrVIII_A_nidulans_FGSC_A4:624142-628650   | WT_5hasex | WT_veg | OK     | 87,0715  | 146,212  | 0,747785      | -1,43149      | 0,15229    | 0,382895   | no  |
| katA   | ChrVI_A_nidulans_FGSC_A4:2498268-2499099   | WT_5hasex | WT_veg | OK     | 48,5249  | 79,2548  | 0,707774      | -1,34503      | 0,178615   | 0,424116   | no  |
| kfsA   | ChrVIII_A_nidulans_FGSC_A4:2368978-2372385 | WT_5hasex | WT_veg | OK     | 16,9886  | 21,2845  | 0,325237      | -0,625591     | 0,531584   | 0,770819   | no  |
| kgdA   | ChrV_A_nidulans_FGSC_A4:2371243-2375139    | WT_5hasex | WT_veg | OK     | 92,61    | 229,073  | 1,30657       | -2,53961      | 0,0110975  | 0,0565581  | no  |

## Supplementary table 1

|       |                                            |           |        |        |          |           |               |               |            |            |     |
|-------|--------------------------------------------|-----------|--------|--------|----------|-----------|---------------|---------------|------------|------------|-----|
| kgdB  | ChrVI_A_nidulans_FGSC_A4:634354-637153     | WT_5hasex | WT_veg | OK     | 294,17   | 770,121   | 1,38844       | -2,61358      | 0,00895981 | 0,0478118  | yes |
| kinA  | ChrV_A_nidulans_FGSC_A4:3088985-3092285    | WT_5hasex | WT_veg | OK     | 21,3503  | 42,3809   | 0,989157      | -2,00668      | 0,0447839  | 0,164017   | no  |
| kipA  | ChrII_A_nidulans_FGSC_A4:1386226-1388945   | WT_5hasex | WT_veg | OK     | 6,56032  | 15,1515   | 1,20762       | -2,11743      | 0,0342232  | 0,134445   | no  |
| kipB  | ChrIII_A_nidulans_FGSC_A4:1811922-1814948  | WT_5hasex | WT_veg | OK     | 22,6684  | 33,0518   | 0,544046      | -1,10625      | 0,268617   | 0,540369   | no  |
| kipA  | ChrI_A_nidulans_FGSC_A4:473442-476895      | WT_5hasex | WT_veg | OK     | 35,1062  | 79,7511   | 1,18378       | -2,40503      | 0,0161712  | 0,0758304  | no  |
| kpcA  | ChrII_A_nidulans_FGSC_A4:3690970-3693786   | WT_5hasex | WT_veg | OK     | 34,044   | 76,8174   | 1,17403       | -2,4473       | 0,0143932  | 0,0692909  | no  |
| lacA  | ChrVIII_A_nidulans_FGSC_A4:2561073-2564478 | WT_5hasex | WT_veg | NOTEST | 0,97039  | 2,57684   | 1,40897       | -1,73997      | 0,0818634  | 1          | no  |
| lacB  | ChrVIII_A_nidulans_FGSC_A4:1893855-1897332 | WT_5hasex | WT_veg | OK     | 18,2317  | 29,0856   | 0,673857      | -1,36745      | 0,171485   | 0,413286   | no  |
| lacC  | ChrVIII_A_nidulans_FGSC_A4:4325240-4328180 | WT_5hasex | WT_veg | NOTEST | 0,521562 | 1,27522   | 1,28984       | -1,27372      | 0,202763   | 1          | no  |
| lacD  | ChrVI_A_nidulans_FGSC_A4:1500035-1503292   | WT_5hasex | WT_veg | NOTEST | 0,129952 | 0,0524184 | -1,30983      | 0,416341      | 0,677161   | 1          | no  |
| lacE  | ChrI_A_nidulans_FGSC_A4:333442-336147      | WT_5hasex | WT_veg | NOTEST | 0,785553 | 1,47321   | 0,907185      | -1,01995      | 0,307754   | 1          | no  |
| lacF  | ChrVII_A_nidulans_FGSC_A4:4022860-4025978  | WT_5hasex | WT_veg | OK     | 11,9474  | 10,5762   | -0,175881     | 0,340194      | 0,733711   | 0,887635   | no  |
| ladA  | ChrVIII_A_nidulans_FGSC_A4:2004338-2005825 | WT_5hasex | WT_veg | OK     | 34,8316  | 74,4375   | 1,09563       | -1,85299      | 0,0638835  | 0,21122    | no  |
| ladB  | ChrIII_A_nidulans_FGSC_A4:2351901-2353104  | WT_5hasex | WT_veg | OK     | 32,1002  | 9,12944   | -1,81398      | 3,031         | 0,00243746 | 0,0164603  | yes |
| ladC  | ChrV_A_nidulans_FGSC_A4:843276-844532      | WT_5hasex | WT_veg | NOTEST | 0        | 0         | 0             | 0             | 1          | 1          | no  |
| laeA  | ChrVIII_A_nidulans_FGSC_A4:2422245-2423500 | WT_5hasex | WT_veg | OK     | 25,9324  | 41,903    | 0,692297      | -1,2323       | 0,217837   | 0,4784     | no  |
| lagA  | ChrVII_A_nidulans_FGSC_A4:4026094-4028135  | WT_5hasex | WT_veg | OK     | 46,3019  | 44,3151   | -0,0632709    | 0,130499      | 0,896172   | 0,960305   | no  |
| lamA  | ChrVIII_A_nidulans_FGSC_A4:2169333-2173411 | WT_5hasex | WT_veg | OK     | 17,449   | 15,4394   | -0,176529     | 0,355928      | 0,721895   | 0,881439   | no  |
| lamB  | ChrVIII_A_nidulans_FGSC_A4:2173829-2174681 | WT_5hasex | WT_veg | OK     | 63,4307  | 59,6909   | -0,0876705    | 0,163688      | 0,869976   | 0,950309   | no  |
| lcbA  | ChrII_A_nidulans_FGSC_A4:3262116-3264410   | WT_5hasex | WT_veg | OK     | 58,4745  | 121,448   | 1,05446       | -2,18954      | 0,0285575  | 0,116666   | no  |
| lccA  | ChrI_A_nidulans_FGSC_A4:3314683-3316243    | WT_5hasex | WT_veg | NOTEST | 0,559323 | 0,596305  | 0,0923697     | -0,0601617    | 0,952027   | 1          | no  |
| lccB  | ChrVI_A_nidulans_FGSC_A4:210508-212513     | WT_5hasex | WT_veg | NOTEST | 0        | 0         | 0             | 0             | 1          | 1          | no  |
| lccC  | ChrV_A_nidulans_FGSC_A4:2943943-2945993    | WT_5hasex | WT_veg | NOTEST | 0,149761 | 0,496626  | 1,72949       | -1,04882      | 0,29426    | 1          | no  |
| lccD  | ChrVIII_A_nidulans_FGSC_A4:2188614-2190529 | WT_5hasex | WT_veg | OK     | 28,1323  | 9,8207    | -1,51833      | 2,90925       | 0,00362297 | 0,0228846  | yes |
| ldhA  | ChrI_A_nidulans_FGSC_A4:2060296-2061498    | WT_5hasex | WT_veg | OK     | 7,54738  | 4,30263   | -0,810759     | 1,03088       | 0,302596   | 0,57835    | no  |
| leu2B | ChrVI_A_nidulans_FGSC_A4:2797132-2798366   | WT_5hasex | WT_veg | OK     | 16,4895  | 40,7346   | 1,3047        | -2,25778      | 0,0239593  | 0,102108   | no  |
| leuB  | ChrIII_A_nidulans_FGSC_A4:1888479-1891295  | WT_5hasex | WT_veg | OK     | 51,0294  | 75,8689   | 0,572182      | -1,16231      | 0,245108   | 0,51272    | no  |
| lipA  | ChrIV_A_nidulans_FGSC_A4:1205837-1208037   | WT_5hasex | WT_veg | NOTEST | 1,36594  | 3,7136    | 1,44292       | -1,76595      | 0,0774045  | 1          | no  |
| lreA  | ChrVI_A_nidulans_FGSC_A4:729190-731996     | WT_5hasex | WT_veg | OK     | 12,4583  | 18,3619   | 0,559611      | -1,06551      | 0,286643   | 0,560934   | no  |
| lreB  | ChrII_A_nidulans_FGSC_A4:3630733-3632041   | WT_5hasex | WT_veg | OK     | 7,12293  | 26,5849   | 1,90007       | -2,9857       | 0,00282932 | 0,0186135  | yes |
| lsdA  | ChrVII_A_nidulans_FGSC_A4:3580969-3582091  | WT_5hasex | WT_veg | NOTEST | 0,980871 | 0,164604  | -2,57506      | 0,850188      | 0,39522    | 1          | no  |
| luA   | ChrI_A_nidulans_FGSC_A4:1907208-1909783    | WT_5hasex | WT_veg | OK     | 26,2728  | 14,6869   | -0,839043     | 1,5444        | 0,122493   | 0,332049   | no  |
| lys   | Contig-mt188_A_nidulans_FGSC_A4:4948-5021  | WT_5hasex | WT_veg | NOTEST | 0        | 0         | 0             | 0             | 1          | 1          | no  |
| lysA  | ChrVI_A_nidulans_FGSC_A4:2538823-2540521   | WT_5hasex | WT_veg | OK     | 171,893  | 237,428   | 0,465975      | -0,935332     | 0,349617   | 0,625204   | no  |
| lysB  | ChrV_A_nidulans_FGSC_A4:1483669-1485008    | WT_5hasex | WT_veg | OK     | 125,338  | 119,994   | -0,0628514    | 0,127769      | 0,898332   | 0,961065   | no  |
| lysF  | ChrI_A_nidulans_FGSC_A4:2356780-2359253    | WT_5hasex | WT_veg | OK     | 24,0748  | 42,7998   | 0,830078      | -1,59256      | 0,111259   | 0,311525   | no  |
| mad1  | ChrVIII_A_nidulans_FGSC_A4:2768160-2770496 | WT_5hasex | WT_veg | OK     | 10,6443  | 19,3932   | 0,865467      | -1,57576      | 0,115081   | 0,31842    | no  |
| mad2  | ChrVII_A_nidulans_FGSC_A4:4189671-4190691  | WT_5hasex | WT_veg | OK     | 86,8723  | 160,133   | 0,882305      | -1,79051      | 0,0733723  | 0,233015   | no  |
| maeA  | ChrI_A_nidulans_FGSC_A4:1031633-1033880    | WT_5hasex | WT_veg | OK     | 78,5002  | 487,899   | 2,63581       | -5,42662      | 5,7432E-08 | 1,4143E-06 | yes |
| maeB  | ChrI_A_nidulans_FGSC_A4:3620852-3622850    | WT_5hasex | WT_veg | OK     | 37,2925  | 82,8004   | 1,15075       | -2,35444      | 0,0185504  | 0,0840535  | no  |
| maiA  | ChrVII_A_nidulans_FGSC_A4:2182403-2183268  | WT_5hasex | WT_veg | OK     | 17,0023  | 60,9156   | 1,84108       | -2,96779      | 0,00299952 | 0,0195416  | yes |
| manA  | ChrVIII_A_nidulans_FGSC_A4:2837921-2839550 | WT_5hasex | WT_veg | OK     | 82,5749  | 129,047   | 0,644123      | -1,33345      | 0,182385   | 0,429769   | no  |
| manB  | ChrVI_A_nidulans_FGSC_A4:1202469-1203747   | WT_5hasex | WT_veg | NOTEST | 0        | 0,829728  | 1.79769e+308  | 1.79769e+308  | 0,0716995  | 1          | no  |
| manC  | ChrI_A_nidulans_FGSC_A4:225256-226710      | WT_5hasex | WT_veg | NOTEST | 0,183062 | 0         | -1.79769e+308 | -1.79769e+308 | 0,224063   | 1          | no  |
| manD  | ChrIV_A_nidulans_FGSC_A4:2225262-2226620   | WT_5hasex | WT_veg | NOTEST | 0        | 0         | 0             | 0             | 1          | 1          | no  |
| manE  | ChrIV_A_nidulans_FGSC_A4:37340-38408       | WT_5hasex | WT_veg | NOTEST | 0,193338 | 0,775018  | 2,00311       | -0,842631     | 0,399435   | 1          | no  |
| manF  | ChrVIII_A_nidulans_FGSC_A4:152892-154365   | WT_5hasex | WT_veg | NOTEST | 0,359809 | 0         | -1.79769e+308 | -1.79769e+308 | 0,133588   | 1          | no  |
| mbf1  | ChrVI_A_nidulans_FGSC_A4:2144521-2147001   | WT_5hasex | WT_veg | OK     | 321,034  | 1201,17   | 1,90364       | -3,39459      | 0,00068732 | 0,00570612 | yes |
| mccA  | ChrIII_A_nidulans_FGSC_A4:1308673-1311503  | WT_5hasex | WT_veg | OK     | 14,1973  | 25,6449   | 0,853057      | -1,57365      | 0,115568   | 0,319319   | no  |
| mccB  | ChrIII_A_nidulans_FGSC_A4:1314942-1316924  | WT_5hasex | WT_veg | OK     | 17,0517  | 27,4114   | 0,684863      | -1,22277      | 0,221416   | 0,483009   | no  |
| mcdA  | ChrVII_A_nidulans_FGSC_A4:1373200-1374919  | WT_5hasex | WT_veg | OK     | 2,92002  | 4,40485   | 0,593117      | -0,771768     | 0,440252   | 0,704387   | no  |
| mcdB  | ChrI_A_nidulans_FGSC_A4:2698842-2700996    | WT_5hasex | WT_veg | OK     | 108,416  | 117,185   | 0,112215      | -0,223931     | 0,822811   | 0,929224   | no  |
| mclA  | ChrIII_A_nidulans_FGSC_A4:2911119-2913148  | WT_5hasex | WT_veg | OK     | 40,3417  | 59,3682   | 0,557419      | -1,14116      | 0,253803   | 0,523148   | no  |



## Supplementary table 1

|       |                                            |           |        |        |          |          |               |               |            |            |     |
|-------|--------------------------------------------|-----------|--------|--------|----------|----------|---------------|---------------|------------|------------|-----|
| mcmA  | ChrIII_A_nidulans_FGSC_A4:3147332-3148240  | WT_5hasex | WT_veg | OK     | 120,795  | 165,62   | 0,455308      | -0,928676     | 0,353057   | 0,6286     | no  |
| mcnA  | ChrVI_A_nidulans_FGSC_A4:3128184-3130192   | WT_5hasex | WT_veg | OK     | 148,851  | 260,727  | 0,80867       | -1,63293      | 0,102484   | 0,294736   | no  |
| mcnB  | ChrIII_A_nidulans_FGSC_A4:2580917-2583071  | WT_5hasex | WT_veg | OK     | 12,7277  | 20,698   | 0,701518      | -1,28465      | 0,198915   | 0,452894   | no  |
| mcnC  | ChrVI_A_nidulans_FGSC_A4:2544121-2547082   | WT_5hasex | WT_veg | OK     | 39,1099  | 79,0966  | 1,01608       | -2,14219      | 0,0321784  | 0,128102   | no  |
| mcsA  | ChrI_A_nidulans_FGSC_A4:2731855-2733574    | WT_5hasex | WT_veg | OK     | 17,5596  | 46,5272  | 1,40581       | -2,43544      | 0,0148738  | 0,0710822  | no  |
| mctA  | ChrVI_A_nidulans_FGSC_A4:2632015-2633353   | WT_5hasex | WT_veg | NOTEST | 0        | 0        | 0             | 0             | 1          | 1          | no  |
| mdhA  | ChrI_A_nidulans_FGSC_A4:2957611-2959180    | WT_5hasex | WT_veg | OK     | 757,896  | 1070,43  | 0,498112      | -0,870557     | 0,383996   | 0,657759   | no  |
| mdhB  | ChrIII_A_nidulans_FGSC_A4:231110-232395    | WT_5hasex | WT_veg | NOTEST | 0,714725 | 2,3436   | 1,71327       | -1,36487      | 0,172295   | 1          | no  |
| mdhC  | ChrI_A_nidulans_FGSC_A4:2296746-2299444    | WT_5hasex | WT_veg | OK     | 516,303  | 1201,06  | 1,21802       | -2,13427      | 0,032821   | 0,130009   | no  |
| mdmB  | ChrI_A_nidulans_FGSC_A4:3519025-3520430    | WT_5hasex | WT_veg | OK     | 18,4338  | 20,0694  | 0,122643      | -0,221476     | 0,824722   | 0,930087   | no  |
| mdpA  | ChrVIII_A_nidulans_FGSC_A4:4458695-4460205 | WT_5hasex | WT_veg | OK     | 1,12835  | 22,6884  | 4,32967       | -4,56687      | 4,9505E-06 | 7,6705E-05 | yes |
| mdpB  | ChrVIII_A_nidulans_FGSC_A4:4457665-4458357 | WT_5hasex | WT_veg | NOTEST | 1,09304  | 1,3422   | 0,296261      | -0,199372     | 0,841972   | 1          | no  |
| mdpC  | ChrVIII_A_nidulans_FGSC_A4:4456517-4457370 | WT_5hasex | WT_veg | NOTEST | 0,884851 | 0,233396 | -1,92266      | 0,619862      | 0,535349   | 1          | no  |
| mdpD  | ChrVIII_A_nidulans_FGSC_A4:4454243-4455887 | WT_5hasex | WT_veg | NOTEST | 0,295565 | 0,517541 | 0,808198      | -0,474002     | 0,635499   | 1          | no  |
| mdpE  | ChrVIII_A_nidulans_FGSC_A4:4452409-4453717 | WT_5hasex | WT_veg | NOTEST | 0,41651  | 1,25027  | 1,58582       | -1,27028      | 0,203984   | 1          | no  |
| mdpF  | ChrVIII_A_nidulans_FGSC_A4:4449913-4450931 | WT_5hasex | WT_veg | NOTEST | 0,91195  | 1,81049  | 0,989351      | -0,811002     | 0,417365   | 1          | no  |
| mdpG  | ChrVIII_A_nidulans_FGSC_A4:4443883-4449445 | WT_5hasex | WT_veg | NOTEST | 1,14865  | 2,27147  | 0,983688      | -1,38197      | 0,166981   | 1          | no  |
| mdpH  | ChrVIII_A_nidulans_FGSC_A4:4441986-4443578 | WT_5hasex | WT_veg | NOTEST | 0        | 0,711085 | 1.79769e+308  | 1.79769e+308  | 0,123323   | 1          | no  |
| mdpI  | ChrVIII_A_nidulans_FGSC_A4:4439761-4441619 | WT_5hasex | WT_veg | NOTEST | 0,283025 | 0        | -1.79769e+308 | -1.79769e+308 | 0,0966285  | 1          | no  |
| mdpJ  | ChrVIII_A_nidulans_FGSC_A4:4438817-4439616 | WT_5hasex | WT_veg | NOTEST | 0        | 0        | 0             | 0             | 1          | 1          | no  |
| mdpK  | ChrVIII_A_nidulans_FGSC_A4:4437655-4438453 | WT_5hasex | WT_veg | NOTEST | 0,227626 | 1,06128  | 2,22106       | -1,14626      | 0,251686   | 1          | no  |
| mdpL  | ChrVIII_A_nidulans_FGSC_A4:4435954-4437295 | WT_5hasex | WT_veg | NOTEST | 0        | 0,608943 | 1.79769e+308  | 1.79769e+308  | 0,123323   | 1          | no  |
| meaA  | ChrIV_A_nidulans_FGSC_A4:1615942-1618264   | WT_5hasex | WT_veg | OK     | 301,534  | 1015,85  | 1,75229       | -3,23649      | 0,00121009 | 0,00918471 | yes |
| meaB  | ChrIII_A_nidulans_FGSC_A4:618106-620369    | WT_5hasex | WT_veg | OK     | 29,9993  | 233,384  | 2,95971       | -6,08384      | 1,1734E-09 | 4,0992E-08 | yes |
| mecA  | ChrI_A_nidulans_FGSC_A4:2156201-2158177    | WT_5hasex | WT_veg | OK     | 92,3829  | 100,924  | 0,127568      | -0,262683     | 0,792795   | 0,915853   | no  |
| mecB  | ChrVII_A_nidulans_FGSC_A4:805736-807575    | WT_5hasex | WT_veg | OK     | 168,547  | 363,675  | 1,1095        | -2,16817      | 0,0301457  | 0,121777   | no  |
| medA  | ChrI_A_nidulans_FGSC_A4:821579-826200      | WT_5hasex | WT_veg | OK     | 36,2331  | 57,3492  | 0,662466      | -1,38234      | 0,166867   | 0,405894   | no  |
| mepA  | ChrVIII_A_nidulans_FGSC_A4:1270950-1273418 | WT_5hasex | WT_veg | OK     | 947,022  | 1528,64  | 0,690775      | -0,836388     | 0,402937   | 0,674246   | no  |
| mepB  | ChrVIII_A_nidulans_FGSC_A4:4287929-4289568 | WT_5hasex | WT_veg | OK     | 109,296  | 166,921  | 0,610928      | -0,950003     | 0,342111   | 0,61765    | no  |
| mepC  | ChrVIII_A_nidulans_FGSC_A4:3375363-3377796 | WT_5hasex | WT_veg | OK     | 28,1907  | 56,7701  | 1,00991       | -1,95905      | 0,0501074  | 0,177798   | no  |
| mesA  | ChrVIII_A_nidulans_FGSC_A4:4094954-4097434 | WT_5hasex | WT_veg | OK     | 11,4394  | 9,93497  | -0,203418     | 0,376138      | 0,706814   | 0,873281   | no  |
| metA  | ChrII_A_nidulans_FGSC_A4:1167800-1169932   | WT_5hasex | WT_veg | OK     | 22,5541  | 32,1566  | 0,511723      | -1,02085      | 0,307324   | 0,583344   | no  |
| metE  | ChrVII_A_nidulans_FGSC_A4:3267092-3269073  | WT_5hasex | WT_veg | OK     | 39,9354  | 157,481  | 1,97943       | -4,0736       | 4,6291E-05 | 0,00055967 | yes |
| metF  | ChrI_A_nidulans_FGSC_A4:1923535-1926011    | WT_5hasex | WT_veg | OK     | 61,3215  | 57,0674  | -0,103727     | 0,211134      | 0,832782   | 0,933564   | no  |
| metG  | ChrIV_A_nidulans_FGSC_A4:1190057-1191628   | WT_5hasex | WT_veg | OK     | 28,7576  | 54,1515  | 0,913059      | -1,77008      | 0,0767144  | 0,24066    | no  |
| metH  | ChrIII_A_nidulans_FGSC_A4:2032093-2034995  | WT_5hasex | WT_veg | OK     | 718,255  | 718,19   | -0,000130784  | 0,000208469   | 0,999834   | 0,999903   | no  |
| metR  | ChrIII_A_nidulans_FGSC_A4:2281128-2282899  | WT_5hasex | WT_veg | OK     | 329,543  | 640,049  | 0,957716      | -1,82108      | 0,068595   | 0,222303   | no  |
| mid1  | ChrIII_A_nidulans_FGSC_A4:2620162-2622472  | WT_5hasex | WT_veg | OK     | 23,4074  | 59,3016  | 1,34111       | -2,74313      | 0,00608575 | 0,0349294  | yes |
| mipA  | ChrVIII_A_nidulans_FGSC_A4:2818652-2820525 | WT_5hasex | WT_veg | OK     | 52,7617  | 157,682  | 1,57945       | -3,2409       | 0,00119155 | 0,00907577 | yes |
| mirA  | ChrIV_A_nidulans_FGSC_A4:2727820-2730060   | WT_5hasex | WT_veg | OK     | 2,25142  | 4,78089  | 1,08644       | -1,4614       | 0,143905   | 0,369109   | no  |
| mirB  | ChrV_A_nidulans_FGSC_A4:804124-806301      | WT_5hasex | WT_veg | OK     | 4,18992  | 1,12288  | -1,89972      | 2,10167       | 0,0355826  | 0,138375   | no  |
| mirC  | ChrIV_A_nidulans_FGSC_A4:1695641-1698374   | WT_5hasex | WT_veg | OK     | 88,8397  | 44,917   | -0,983943     | 1,99991       | 0,0455103  | 0,165924   | no  |
| mkkA  | ChrII_A_nidulans_FGSC_A4:1815443-1817173   | WT_5hasex | WT_veg | OK     | 57,1752  | 133,624  | 1,22472       | -2,48204      | 0,0130631  | 0,0642996  | no  |
| mlp1  | ChrV_A_nidulans_FGSC_A4:2600151-2606453    | WT_5hasex | WT_veg | OK     | 18,5688  | 32,6434  | 0,813912      | -1,67148      | 0,0946264  | 0,278574   | no  |
| mndA  | ChrVII_A_nidulans_FGSC_A4:1767444-1770366  | WT_5hasex | WT_veg | OK     | 21,753   | 35,7809  | 0,717972      | -1,41673      | 0,156561   | 0,389754   | no  |
| mndB  | ChrVI_A_nidulans_FGSC_A4:941981-944723     | WT_5hasex | WT_veg | OK     | 24,3222  | 27,8384  | 0,194799      | -0,397303     | 0,691144   | 0,864252   | no  |
| mndC  | ChrVI_A_nidulans_FGSC_A4:2681883-2684463   | WT_5hasex | WT_veg | NOTEST | 1,72069  | 1,54356  | -0,156726     | 0,187898      | 0,850957   | 1          | no  |
| mnpA  | ChrVII_A_nidulans_FGSC_A4:4048932-4049431  | WT_5hasex | WT_veg | OK     | 53,0363  | 231,876  | 2,1283        | -3,75877      | 0,00017075 | 0,00174009 | yes |
| mns1A | ChrII_A_nidulans_FGSC_A4:3240022-3242719   | WT_5hasex | WT_veg | OK     | 16,294   | 24,079   | 0,563429      | -1,06651      | 0,286192   | 0,56049    | no  |
| mns1B | ChrVIII_A_nidulans_FGSC_A4:2473064-2474751 | WT_5hasex | WT_veg | OK     | 53,8915  | 147,655  | 1,4541        | -2,8865       | 0,00389554 | 0,0242671  | yes |
| mns1C | ChrII_A_nidulans_FGSC_A4:3744355-3746238   | WT_5hasex | WT_veg | OK     | 12,6365  | 19,0608  | 0,593009      | -0,99047      | 0,321712   | 0,597941   | no  |
| mobA  | ChrI_A_nidulans_FGSC_A4:646997-648088      | WT_5hasex | WT_veg | OK     | 46,2141  | 101,11   | 1,12952       | -2,20224      | 0,0276484  | 0,113891   | no  |
| mobB  | ChrVIII_A_nidulans_FGSC_A4:724338-725993   | WT_5hasex | WT_veg | OK     | 62,5533  | 63,2823  | 0,0167167     | -0,0330109    | 0,973666   | 0,99069    | no  |

## Supplementary table 1

|       |                                            |           |        |        |          |          |           |           |            |            |     |
|-------|--------------------------------------------|-----------|--------|--------|----------|----------|-----------|-----------|------------|------------|-----|
| modA  | ChrIV_A_nidulans_FGSC_A4:1699119-1700729   | WT_5hasex | WT_veg | OK     | 162,145  | 165,031  | 0,0254581 | -0,050841 | 0,959452   | 0,985009   | no  |
| mpkA  | ChrV_A_nidulans_FGSC_A4:2038482-2039740    | WT_5hasex | WT_veg | OK     | 122,986  | 293,678  | 1,25574   | -2,51977  | 0,011743   | 0,0591024  | no  |
| mpkB  | ChrII_A_nidulans_FGSC_A4:3287538-3288944   | WT_5hasex | WT_veg | OK     | 170,704  | 428,705  | 1,32849   | -2,68618  | 0,00722737 | 0,0401621  | yes |
| mpkC  | ChrIII_A_nidulans_FGSC_A4:1364035-1365569  | WT_5hasex | WT_veg | OK     | 40,2233  | 55,0399  | 0,452447  | -0,880458 | 0,378611   | 0,653163   | no  |
| mrA   | ChrVIII_A_nidulans_FGSC_A4:3180913-3183249 | WT_5hasex | WT_veg | OK     | 10,5957  | 9,46817  | -0,162318 | 0,28226   | 0,777744   | 0,909068   | no  |
| mrpA  | ChrI_A_nidulans_FGSC_A4:614103-615496      | WT_5hasex | WT_veg | OK     | 114,165  | 201,576  | 0,820209  | -1,67421  | 0,09409    | 0,277353   | no  |
| msb1  | ChrVI_A_nidulans_FGSC_A4:2176482-2179828   | WT_5hasex | WT_veg | OK     | 13,7608  | 22,9833  | 0,740022  | -1,45313  | 0,146189   | 0,372884   | no  |
| mshA  | ChrVII_A_nidulans_FGSC_A4:1678180-1682022  | WT_5hasex | WT_veg | OK     | 17,6987  | 48,8573  | 1,46493   | -2,9446   | 0,00323367 | 0,0208043  | yes |
| msnA  | ChrVII_A_nidulans_FGSC_A4:1498628-1500817  | WT_5hasex | WT_veg | OK     | 114,342  | 169,711  | 0,569723  | -1,16457  | 0,244194   | 0,511645   | no  |
| msrA  | ChrIII_A_nidulans_FGSC_A4:1810538-1811488  | WT_5hasex | WT_veg | OK     | 93,927   | 272,237  | 1,53525   | -3,18471  | 0,00144901 | 0,0106689  | yes |
| msrB  | ChrVII_A_nidulans_FGSC_A4:2303180-2303714  | WT_5hasex | WT_veg | OK     | 42,8546  | 201,156  | 2,2308    | -3,97955  | 6,9046E-05 | 0,0007945  | yes |
| mstA  | ChrIII_A_nidulans_FGSC_A4:2984047-2986162  | WT_5hasex | WT_veg | NOTEST | 0,601061 | 1,53618  | 1,35376   | -1,34076  | 0,179999   | 1          | no  |
| mstB  | ChrVII_A_nidulans_FGSC_A4:4060835-4062800  | WT_5hasex | WT_veg | OK     | 25,197   | 25,5363  | 0,0192964 | -0,036645 | 0,970768   | 0,98937    | no  |
| mstE  | ChrI_A_nidulans_FGSC_A4:1985003-1987018    | WT_5hasex | WT_veg | OK     | 2986,7   | 2190,19  | -0,447495 | 0,552472  | 0,580625   | 0,801399   | no  |
| mthA  | ChrII_A_nidulans_FGSC_A4:1853113-1854640   | WT_5hasex | WT_veg | OK     | 19,9932  | 29,3439  | 0,553554  | -1,03401  | 0,301131   | 0,576849   | no  |
| mr4   | ChrIII_A_nidulans_FGSC_A4:2124623-2128055  | WT_5hasex | WT_veg | OK     | 14,3422  | 65,5968  | 2,19336   | -4,40293  | 0,00001068 | 0,00015235 | yes |
| musN  | ChrVII_A_nidulans_FGSC_A4:2822328-2828770  | WT_5hasex | WT_veg | OK     | 14,6334  | 19,2662  | 0,396803  | -0,806002 | 0,420242   | 0,688387   | no  |
| mutA  | ChrIV_A_nidulans_FGSC_A4:218463-220050     | WT_5hasex | WT_veg | NOTEST | 0,948411 | 0,123365 | -2,94258  | 0,97539   | 0,329367   | 1          | no  |
| myg1  | ChrII_A_nidulans_FGSC_A4:1856615-1857757   | WT_5hasex | WT_veg | OK     | 58,1728  | 99,486   | 0,77415   | -1,55796  | 0,119243   | 0,326313   | no  |
| myoA  | ChrVII_A_nidulans_FGSC_A4:1166695-1171248  | WT_5hasex | WT_veg | OK     | 37,4242  | 98,2277  | 1,39216   | -2,9116   | 0,00359586 | 0,0227463  | yes |
| nadA  | ChrI_A_nidulans_FGSC_A4:1325825-1326920    | WT_5hasex | WT_veg | OK     | 28,1424  | 244,99   | 3,1219    | -5,96588  | 2,4331E-09 | 7,9242E-08 | yes |
| nagA  | ChrVII_A_nidulans_FGSC_A4:994216-996171    | WT_5hasex | WT_veg | OK     | 20,8536  | 39,2706  | 0,913156  | -1,78316  | 0,07456    | 0,235566   | no  |
| napA  | ChrIV_A_nidulans_FGSC_A4:1788866-1791254   | WT_5hasex | WT_veg | OK     | 158,856  | 532,802  | 1,74588   | -3,29612  | 0,00098032 | 0,00772141 | yes |
| napB  | ChrII_A_nidulans_FGSC_A4:999810-1002123    | WT_5hasex | WT_veg | OK     | 98,097   | 486,536  | 2,31027   | -4,77638  | 1,7848E-06 | 3,0959E-05 | yes |
| ndc1  | ChrIII_A_nidulans_FGSC_A4:2112463-2114930  | WT_5hasex | WT_veg | OK     | 23,6686  | 51,7839  | 1,12953   | -2,30211  | 0,0213287  | 0,0936069  | no  |
| ndc80 | ChrIII_A_nidulans_FGSC_A4:418061-420348    | WT_5hasex | WT_veg | OK     | 7,64134  | 14,8352  | 0,957123  | -1,677    | 0,0935429  | 0,276284   | no  |
| ndeA  | ChrIV_A_nidulans_FGSC_A4:1735806-1738419   | WT_5hasex | WT_veg | OK     | 180,614  | 470,084  | 1,38001   | -2,4677   | 0,0135984  | 0,0662991  | no  |
| ndhA  | Contig-mt197_A_nidulans_FGSC_A4:6042-7101  | WT_5hasex | WT_veg | NOTEST | 0        | 0        | 0         | 0         | 1          | 1          | no  |
| ndhB  | Contig-mt197_A_nidulans_FGSC_A4:2-305      | WT_5hasex | WT_veg | NOTEST | 0        | 0        | 0         | 0         | 1          | 1          | no  |
| ndhD  | Contig-mt197_A_nidulans_FGSC_A4:7347-7797  | WT_5hasex | WT_veg | NOTEST | 0        | 0        | 0         | 0         | 1          | 1          | no  |
| ndhF  | Contig-mt188_A_nidulans_FGSC_A4:5927-6614  | WT_5hasex | WT_veg | NOTEST | 0        | 0        | 0         | 0         | 1          | 1          | no  |
| ndiA  | ChrV_A_nidulans_FGSC_A4:3194296-3195877    | WT_5hasex | WT_veg | NOTEST | 0,807139 | 2,20849  | 1,45217   | -1,52452  | 0,12738    | 1          | no  |
| ndiF  | ChrVIII_A_nidulans_FGSC_A4:1539657-1542242 | WT_5hasex | WT_veg | OK     | 120,65   | 1102,78  | 3,19225   | -6,02335  | 1,7085E-09 | 5,706E-08  | yes |
| nha1  | ChrIV_A_nidulans_FGSC_A4:533205-536509     | WT_5hasex | WT_veg | OK     | 32,789   | 54,9625  | 0,745235  | -1,53618  | 0,124495   | 0,335482   | no  |
| niaD  | ChrVIII_A_nidulans_FGSC_A4:1823376-1826348 | WT_5hasex | WT_veg | OK     | 52,8505  | 44,2269  | -0,256993 | 0,523397  | 0,600698   | 0,813641   | no  |
| nic96 | ChrIV_A_nidulans_FGSC_A4:1406847-1410477   | WT_5hasex | WT_veg | OK     | 37,2872  | 118,362  | 1,66646   | -3,44759  | 0,00056562 | 0,00483987 | yes |
| niiA  | ChrVIII_A_nidulans_FGSC_A4:1818280-1822109 | WT_5hasex | WT_veg | OK     | 591,815  | 170,197  | -1,79794  | 2,69976   | 0,00693889 | 0,0388682  | yes |
| nikA  | ChrIII_A_nidulans_FGSC_A4:1914036-1917994  | WT_5hasex | WT_veg | OK     | 122,095  | 93,5592  | -0,384056 | 0,745806  | 0,455784   | 0,717041   | no  |
| nimA  | ChrIII_A_nidulans_FGSC_A4:2975356-2977573  | WT_5hasex | WT_veg | OK     | 18,1282  | 29,1227  | 0,683908  | -1,34282  | 0,179329   | 0,425174   | no  |
| nimE  | ChrII_A_nidulans_FGSC_A4:3492935-3495574   | WT_5hasex | WT_veg | OK     | 77,0557  | 142,841  | 0,890433  | -1,82014  | 0,068738   | 0,222593   | no  |
| nimO  | ChrVII_A_nidulans_FGSC_A4:1856409-1859705  | WT_5hasex | WT_veg | OK     | 32,9072  | 46,237   | 0,490647  | -1,01631  | 0,30948    | 0,585888   | no  |
| nimT  | ChrII_A_nidulans_FGSC_A4:2581917-2583979   | WT_5hasex | WT_veg | OK     | 84,4099  | 133,719  | 0,663717  | -1,34418  | 0,17889    | 0,424498   | no  |
| nimU  | ChrVII_A_nidulans_FGSC_A4:3009772-3011449  | WT_5hasex | WT_veg | OK     | 17,2237  | 18,9321  | 0,136438  | -0,254953 | 0,79876    | 0,918839   | no  |
| nimX  | ChrII_A_nidulans_FGSC_A4:1843641-1844999   | WT_5hasex | WT_veg | OK     | 58,034   | 126,411  | 1,12315   | -2,30139  | 0,0213698  | 0,0937403  | no  |
| nirA  | ChrVIII_A_nidulans_FGSC_A4:4617253-4620136 | WT_5hasex | WT_veg | OK     | 37,9787  | 56,4817  | 0,572593  | -1,09357  | 0,274144   | 0,546898   | no  |
| nitA  | ChrIII_A_nidulans_FGSC_A4:3268376-3269444  | WT_5hasex | WT_veg | OK     | 146,26   | 410,639  | 1,48934   | -2,31485  | 0,020621   | 0,0912731  | no  |
| nkuA  | ChrIV_A_nidulans_FGSC_A4:2598511-2600686   | WT_5hasex | WT_veg | NOTEST | 0        | 0        | 0         | 0         | 1          | 1          | no  |
| nkuB  | ChrIII_A_nidulans_FGSC_A4:1679477-1682080  | WT_5hasex | WT_veg | OK     | 50,232   | 129,699  | 1,36849   | -2,78919  | 0,00528396 | 0,0310868  | yes |
| nmdA  | ChrI_A_nidulans_FGSC_A4:2873669-2879359    | WT_5hasex | WT_veg | OK     | 22,532   | 29,8581  | 0,406146  | -0,832445 | 0,405158   | 0,676304   | no  |
| nmrA  | ChrII_A_nidulans_FGSC_A4:992770-993897     | WT_5hasex | WT_veg | OK     | 18,9442  | 27,6485  | 0,545448  | -0,949483 | 0,342375   | 0,617876   | no  |
| nmt1  | ChrII_A_nidulans_FGSC_A4:488022-489597     | WT_5hasex | WT_veg | OK     | 2512,83  | 889,419  | -1,49838  | 1,68895   | 0,0912291  | 0,271408   | no  |
| nop10 | ChrII_A_nidulans_FGSC_A4:1290279-1290956   | WT_5hasex | WT_veg | OK     | 152,975  | 657,854  | 2,10447   | -4,10316  | 4,0754E-05 | 0,00050131 | yes |
| nop58 | ChrVI_A_nidulans_FGSC_A4:1604575-1606823   | WT_5hasex | WT_veg | OK     | 64,9903  | 503,767  | 2,95446   | -5,76331  | 8,248E-09  | 2,4364E-07 | yes |

## Supplementary table 1

|        |                                            |           |        |        |          |         |           |            |            |            |     |
|--------|--------------------------------------------|-----------|--------|--------|----------|---------|-----------|------------|------------|------------|-----|
| nopA   | ChrVI_A_nidulans_FGSC_A4:963177-964743     | WT_5hasex | WT_veg | OK     | 1458,17  | 2243,18 | 0,621389  | -0,867282  | 0,385787   | 0,659665   | no  |
| nosA   | ChrVII_A_nidulans_FGSC_A4:2057388-2059740  | WT_5hasex | WT_veg | OK     | 105,559  | 271,052 | 1,36053   | -2,36133   | 0,0182095  | 0,0828527  | no  |
| noxA   | ChrV_A_nidulans_FGSC_A4:2750332-2752389    | WT_5hasex | WT_veg | OK     | 23,1572  | 38,0007 | 0,714566  | -1,27405   | 0,202645   | 0,458327   | no  |
| npqA   | ChrI_A_nidulans_FGSC_A4:1110159-1111292    | WT_5hasex | WT_veg | OK     | 18,0595  | 16,0953 | -0,166118 | 0,285902   | 0,774953   | 0,908015   | no  |
| npkA   | ChrI_A_nidulans_FGSC_A4:1430045-1432033    | WT_5hasex | WT_veg | OK     | 35,6621  | 72,7762 | 1,02907   | -2,08369   | 0,0371887  | 0,142913   | no  |
| nrtB   | ChrVIII_A_nidulans_FGSC_A4:3677788-3679474 | WT_5hasex | WT_veg | OK     | 55,0756  | 142,246 | 1,3689    | -2,33513   | 0,0195367  | 0,0875193  | no  |
| nsa2   | ChrVI_A_nidulans_FGSC_A4:2371777-2373026   | WT_5hasex | WT_veg | OK     | 43,2869  | 173,061 | 1,99928   | -3,90871   | 9,2791E-05 | 0,00102841 | yes |
| nsdC   | ChrII_A_nidulans_FGSC_A4:1585557-1587489   | WT_5hasex | WT_veg | OK     | 24,3836  | 59,9122 | 1,29694   | -2,63775   | 0,00834591 | 0,0450729  | yes |
| nsdD   | ChrVI_A_nidulans_FGSC_A4:1646412-1649245   | WT_5hasex | WT_veg | OK     | 42,6645  | 69,5674 | 0,705375  | -1,47823   | 0,139345   | 0,361395   | no  |
| nsfA   | ChrVI_A_nidulans_FGSC_A4:1842729-1845667   | WT_5hasex | WT_veg | OK     | 50,4599  | 64,4917 | 0,353975  | -0,732414  | 0,463916   | 0,723193   | no  |
| nsp1   | ChrIII_A_nidulans_FGSC_A4:1851596-1853611  | WT_5hasex | WT_veg | OK     | 35,0385  | 65,1455 | 0,894724  | -1,84482   | 0,065064   | 0,214042   | no  |
| nucA   | ChrVII_A_nidulans_FGSC_A4:3137728-3138733  | WT_5hasex | WT_veg | OK     | 30,8088  | 70,2636 | 1,18944   | -2,24793   | 0,0245809  | 0,104021   | no  |
| nudA   | ChrVIII_A_nidulans_FGSC_A4:4538249-4551348 | WT_5hasex | WT_veg | OK     | 7,15934  | 11,8796 | 0,730592  | -1,55271   | 0,120493   | 0,328516   | no  |
| nudC   | ChrV_A_nidulans_FGSC_A4:1416053-1416901    | WT_5hasex | WT_veg | OK     | 78,3045  | 188,61  | 1,26824   | -2,5637    | 0,0103563  | 0,0535569  | no  |
| nudE   | ChrI_A_nidulans_FGSC_A4:1184702-1186984    | WT_5hasex | WT_veg | OK     | 71,0403  | 81,0283 | 0,189788  | -0,384301  | 0,700756   | 0,869795   | no  |
| nudF   | ChrI_A_nidulans_FGSC_A4:953051-954502      | WT_5hasex | WT_veg | OK     | 28,8265  | 23,3201 | -0,305822 | 0,591926   | 0,5539     | 0,784441   | no  |
| nudG   | ChrVIII_A_nidulans_FGSC_A4:3604816-3605709 | WT_5hasex | WT_veg | OK     | 362,117  | 598,289 | 0,724385  | -1,48182   | 0,138388   | 0,359819   | no  |
| nudI   | ChrVII_A_nidulans_FGSC_A4:826263-828548    | WT_5hasex | WT_veg | OK     | 13,1754  | 20,4519 | 0,634383  | -1,20348   | 0,228792   | 0,491884   | no  |
| nudK   | ChrVII_A_nidulans_FGSC_A4:2367318-2368566  | WT_5hasex | WT_veg | OK     | 32,4944  | 35,1387 | 0,112867  | -0,218488  | 0,827049   | 0,931197   | no  |
| nudM   | ChrI_A_nidulans_FGSC_A4:535511-539583      | WT_5hasex | WT_veg | OK     | 10,1404  | 15,4463 | 0,607155  | -1,18416   | 0,236348   | 0,501741   | no  |
| nudN   | ChrIII_A_nidulans_FGSC_A4:1374007-1376021  | WT_5hasex | WT_veg | OK     | 28,1446  | 34,8525 | 0,308405  | -0,617942  | 0,536614   | 0,773409   | no  |
| nudR   | ChrIII_A_nidulans_FGSC_A4:560621-562633    | WT_5hasex | WT_veg | OK     | 16,0639  | 32,7255 | 1,0266    | -1,95661   | 0,0503934  | 0,178487   | no  |
| nup120 | ChrVIII_A_nidulans_FGSC_A4:1103912-1108145 | WT_5hasex | WT_veg | OK     | 17,0678  | 32,3801 | 0,923834  | -1,89906   | 0,0575572  | 0,196801   | no  |
| nup133 | ChrIII_A_nidulans_FGSC_A4:2476101-2480183  | WT_5hasex | WT_veg | OK     | 25,2637  | 34,5803 | 0,452883  | -0,938667  | 0,347902   | 0,623603   | no  |
| nup159 | ChrVII_A_nidulans_FGSC_A4:2817519-2822024  | WT_5hasex | WT_veg | OK     | 13,4205  | 29,5211 | 1,13731   | -2,33154   | 0,019725   | 0,0881711  | no  |
| nup170 | ChrI_A_nidulans_FGSC_A4:3022534-3026843    | WT_5hasex | WT_veg | OK     | 23,4113  | 30,934  | 0,401989  | -0,833982  | 0,404291   | 0,675477   | no  |
| nup192 | ChrVIII_A_nidulans_FGSC_A4:4791340-4796695 | WT_5hasex | WT_veg | OK     | 19,2847  | 26,5783 | 0,46279   | -0,955869  | 0,339139   | 0,615017   | no  |
| nup2   | ChrV_A_nidulans_FGSC_A4:2654654-2659037    | WT_5hasex | WT_veg | OK     | 16,2851  | 52,535  | 1,68973   | -3,46964   | 0,00052116 | 0,00450951 | yes |
| nup37  | ChrVI_A_nidulans_FGSC_A4:2842356-2851019   | WT_5hasex | WT_veg | OK     | 20,8141  | 37,6185 | 0,853885  | -1,69225   | 0,0905979  | 0,270313   | no  |
| nup42  | ChrIII_A_nidulans_FGSC_A4:1575699-1577537  | WT_5hasex | WT_veg | OK     | 12,7269  | 24,8695 | 0,966499  | -1,70013   | 0,0891064  | 0,267278   | no  |
| nup49  | ChrVII_A_nidulans_FGSC_A4:3934633-3936168  | WT_5hasex | WT_veg | OK     | 31,6209  | 71,2882 | 1,17279   | -2,34068   | 0,0192484  | 0,0864093  | no  |
| nup57  | ChrVIII_A_nidulans_FGSC_A4:1630667-1632269 | WT_5hasex | WT_veg | OK     | 27,9305  | 95,4665 | 1,77315   | -3,54196   | 0,00039717 | 0,00357091 | yes |
| nup82  | ChrI_A_nidulans_FGSC_A4:1104862-1107690    | WT_5hasex | WT_veg | OK     | 21,9329  | 52,3118 | 1,25404   | -2,55949   | 0,0104825  | 0,0540598  | no  |
| nup84  | ChrVIII_A_nidulans_FGSC_A4:1239737-1243109 | WT_5hasex | WT_veg | OK     | 34,6205  | 93,1737 | 1,4283    | -2,96608   | 0,00301625 | 0,019632   | yes |
| nup85  | ChrVI_A_nidulans_FGSC_A4:404716-408299     | WT_5hasex | WT_veg | OK     | 26,8237  | 50,8186 | 0,921846  | -1,91894   | 0,0549923  | 0,189786   | no  |
| nuvG   | ChrI_A_nidulans_FGSC_A4:2635303-2636758    | WT_5hasex | WT_veg | OK     | 15,6281  | 16,1267 | 0,0453073 | -0,0767307 | 0,938838   | 0,976991   | no  |
| odeA   | ChrVIII_A_nidulans_FGSC_A4:1718540-1720290 | WT_5hasex | WT_veg | OK     | 216,829  | 432,955 | 0,997659  | -1,97886   | 0,047832   | 0,172315   | no  |
| oefA   | ChrVI_A_nidulans_FGSC_A4:473778-476391     | WT_5hasex | WT_veg | OK     | 26,3438  | 58,8828 | 1,16038   | -2,39593   | 0,0165783  | 0,0772347  | no  |
| oefB   | ChrI_A_nidulans_FGSC_A4:3564595-3565373    | WT_5hasex | WT_veg | OK     | 58,052   | 244,667 | 2,0754    | -3,83415   | 0,000126   | 0,00134306 | yes |
| oefC   | ChrVI_A_nidulans_FGSC_A4:1925547-1927551   | WT_5hasex | WT_veg | OK     | 27,8624  | 20,6182 | -0,434402 | 0,850775   | 0,394894   | 0,667933   | no  |
| oliA   | Contig-mt188_A_nidulans_FGSC_A4:8958-9729  | WT_5hasex | WT_veg | NOTEST | 0,260544 | 1,10198 | 2,0805    | -0,875186  | 0,381473   | 1          | no  |
| oliC   | ChrVII_A_nidulans_FGSC_A4:1390666-1391579  | WT_5hasex | WT_veg | OK     | 4014,21  | 5718,65 | 0,510559  | -0,692417  | 0,488675   | 0,741801   | no  |
| orlA   | ChrVI_A_nidulans_FGSC_A4:708553-711958     | WT_5hasex | WT_veg | OK     | 156,324  | 347,598 | 1,15288   | -2,09372   | 0,0362852  | 0,140492   | no  |
| orsA   | ChrII_A_nidulans_FGSC_A4:207765-214267     | WT_5hasex | WT_veg | NOTEST | 0,928521 | 1,32677 | 0,514906  | -0,718548  | 0,47242    | 1          | no  |
| orsB   | ChrII_A_nidulans_FGSC_A4:215091-216972     | WT_5hasex | WT_veg | NOTEST | 0,701472 | 2,38994 | 1,76852   | -1,72455   | 0,0846081  | 1          | no  |
| orsC   | ChrII_A_nidulans_FGSC_A4:217329-218607     | WT_5hasex | WT_veg | NOTEST | 0,701013 | 2,64834 | 1,91757   | -1,64095   | 0,100808   | 1          | no  |
| otaA   | ChrVII_A_nidulans_FGSC_A4:1958897-1960694  | WT_5hasex | WT_veg | OK     | 65,1454  | 315,673 | 2,2767    | -4,73606   | 2,1791E-06 | 3,7075E-05 | yes |
| oxiC   | Contig-mt188_A_nidulans_FGSC_A4:5085-5895  | WT_5hasex | WT_veg | NOTEST | 0        | 0       | 0         | 0          | 1          | 1          | no  |
| pabaa  | ChrI_A_nidulans_FGSC_A4:2431795-2434267    | WT_5hasex | WT_veg | OK     | 34,414   | 49,672  | 0,529439  | -1,07647   | 0,281719   | 0,555487   | no  |
| pacA   | ChrIV_A_nidulans_FGSC_A4:869878-871226     | WT_5hasex | WT_veg | OK     | 322,792  | 36,2893 | -3,15299  | 4,7153     | 2,4136E-06 | 4,0511E-05 | yes |
| pacC   | ChrVI_A_nidulans_FGSC_A4:2592446-2595013   | WT_5hasex | WT_veg | OK     | 37,2066  | 85,1506 | 1,19446   | -2,49548   | 0,0125786  | 0,0624546  | no  |
| palA   | ChrIII_A_nidulans_FGSC_A4:2307163-2310033  | WT_5hasex | WT_veg | OK     | 15,785   | 37,7361 | 1,25739   | -2,51047   | 0,012057   | 0,0603967  | no  |
| palB   | ChrVIII_A_nidulans_FGSC_A4:4123296-4126153 | WT_5hasex | WT_veg | OK     | 15,6699  | 12,7461 | -0,297933 | 0,57771    | 0,56346    | 0,791132   | no  |

## Supplementary table 1

|        |                                            |           |        |        |          |          |               |               |            |            |     |
|--------|--------------------------------------------|-----------|--------|--------|----------|----------|---------------|---------------|------------|------------|-----|
| palC   | ChrIV_A_nidulans_FGSC_A4:1956348-1957928   | WT_5hasex | WT_veg | OK     | 15,5089  | 18,6377  | 0,265121      | -0,476083     | 0,634015   | 0,832632   | no  |
| palF   | ChrVII_A_nidulans_FGSC_A4:2043780-2046290  | WT_5hasex | WT_veg | OK     | 18,1913  | 18,7173  | 0,0411248     | -0,082952     | 0,93389    | 0,975157   | no  |
| palH   | ChrI_A_nidulans_FGSC_A4:3474525-3476891    | WT_5hasex | WT_veg | OK     | 15,9793  | 37,0253  | 1,21231       | -2,37442      | 0,0175767  | 0,0807164  | no  |
| palI   | ChrIII_A_nidulans_FGSC_A4:780515-783255    | WT_5hasex | WT_veg | OK     | 20,6477  | 28,5603  | 0,468029      | -0,938761     | 0,347853   | 0,623582   | no  |
| palcA  | ChrII_A_nidulans_FGSC_A4:1342159-1344993   | WT_5hasex | WT_veg | OK     | 19,7348  | 90,7663  | 2,20141       | -4,39616      | 1,1019E-05 | 0,00015664 | yes |
| pan2   | ChrVII_A_nidulans_FGSC_A4:2739265-2743013  | WT_5hasex | WT_veg | OK     | 36,5436  | 30,1515  | -0,277387     | 0,56526       | 0,571897   | 0,796247   | no  |
| panK   | ChrIII_A_nidulans_FGSC_A4:876138-877661    | WT_5hasex | WT_veg | OK     | 24,4916  | 28,0371  | 0,195054      | -0,369857     | 0,711489   | 0,876038   | no  |
| pantoA | ChrVIII_A_nidulans_FGSC_A4:4299992-4301278 | WT_5hasex | WT_veg | OK     | 34,168   | 25,0052  | -0,450419     | 0,890693      | 0,373094   | 0,647916   | no  |
| pantoB | ChrVII_A_nidulans_FGSC_A4:1854819-1856168  | WT_5hasex | WT_veg | OK     | 42,6616  | 36,8472  | -0,211385     | 0,431688      | 0,665968   | 0,850799   | no  |
| papA   | ChrVII_A_nidulans_FGSC_A4:2836931-2838895  | WT_5hasex | WT_veg | OK     | 45,1018  | 85,934   | 0,930043      | -1,90762      | 0,0564399  | 0,193406   | no  |
| par1   | ChrII_A_nidulans_FGSC_A4:2187718-2188472   | WT_5hasex | WT_veg | OK     | 90,4073  | 326,971  | 1,85465       | -3,55692      | 0,00037524 | 0,00340301 | yes |
| pat1   | ChrVI_A_nidulans_FGSC_A4:2919995-2923039   | WT_5hasex | WT_veg | OK     | 47,0651  | 79,1919  | 0,750696      | -1,5672       | 0,117068   | 0,322157   | no  |
| pbsA   | ChrVIII_A_nidulans_FGSC_A4:2030938-2033306 | WT_5hasex | WT_veg | OK     | 56,2561  | 166,22   | 1,56302       | -3,1782       | 0,00148193 | 0,0108793  | yes |
| pchA   | ChrIII_A_nidulans_FGSC_A4:384342-385884    | WT_5hasex | WT_veg | OK     | 8,90033  | 9,72942  | 0,128495      | -0,21309      | 0,831257   | 0,932872   | no  |
| pclA   | ChrVIII_A_nidulans_FGSC_A4:3506317-3508051 | WT_5hasex | WT_veg | OK     | 26,1229  | 47,1972  | 0,853384      | -1,49027      | 0,136153   | 0,356058   | no  |
| pcmA   | ChrII_A_nidulans_FGSC_A4:1669165-1671841   | WT_5hasex | WT_veg | OK     | 77,0484  | 134,425  | 0,80296       | -1,66379      | 0,0961553  | 0,281682   | no  |
| pcrA   | ChrIV_A_nidulans_FGSC_A4:115058-116157     | WT_5hasex | WT_veg | OK     | 164,066  | 227,431  | 0,471146      | -0,952538     | 0,340824   | 0,616538   | no  |
| pcsA   | ChrI_A_nidulans_FGSC_A4:2105772-2108016    | WT_5hasex | WT_veg | OK     | 4,99296  | 7,90663  | 0,663169      | -0,930456     | 0,352135   | 0,627639   | no  |
| pdCA   | ChrIII_A_nidulans_FGSC_A4:658097-660253    | WT_5hasex | WT_veg | OK     | 4984,1   | 3128,35  | -0,671931     | 0,61462       | 0,538806   | 0,774754   | no  |
| pdCB   | ChrV_A_nidulans_FGSC_A4:355535-357454      | WT_5hasex | WT_veg | OK     | 35,2566  | 39,2596  | 0,155155      | -0,271916     | 0,785687   | 0,912449   | no  |
| pdEA   | ChrVIII_A_nidulans_FGSC_A4:2347771-2349625 | WT_5hasex | WT_veg | OK     | 4,55505  | 6,86301  | 0,591375      | -0,881779     | 0,377896   | 0,65253    | no  |
| pdEB   | ChrVI_A_nidulans_FGSC_A4:2954204-2957249   | WT_5hasex | WT_veg | OK     | 17,875   | 152,078  | 3,08879       | -6,2105       | 5,2816E-10 | 1,9615E-08 | yes |
| pdhA   | ChrI_A_nidulans_FGSC_A4:2921549-2923388    | WT_5hasex | WT_veg | OK     | 327,823  | 784,425  | 1,25872       | -2,35305      | 0,01862    | 0,0842522  | no  |
| pdhB   | ChrV_A_nidulans_FGSC_A4:1346355-1347968    | WT_5hasex | WT_veg | OK     | 584,857  | 1711,04  | 1,54872       | -2,76338      | 0,00572069 | 0,0332124  | yes |
| pdhC   | ChrVIII_A_nidulans_FGSC_A4:525522-527170   | WT_5hasex | WT_veg | OK     | 359,05   | 1050,2   | 1,5484        | -2,93157      | 0,00337248 | 0,0215729  | yes |
| pdhX   | ChrVI_A_nidulans_FGSC_A4:2229176-2230459   | WT_5hasex | WT_veg | OK     | 117,443  | 215,049  | 0,872708      | -1,81188      | 0,0700048  | 0,225528   | no  |
| pdia   | ChrIV_A_nidulans_FGSC_A4:1536308-1538457   | WT_5hasex | WT_veg | OK     | 224,327  | 236,845  | 0,0783383     | -0,147853     | 0,882458   | 0,955445   | no  |
| pdib   | ChrVIII_A_nidulans_FGSC_A4:4147347-4148918 | WT_5hasex | WT_veg | OK     | 28,1728  | 28,4478  | 0,0140142     | -0,0268442    | 0,978584   | 0,992466   | no  |
| pdKA   | ChrI_A_nidulans_FGSC_A4:2057539-2060132    | WT_5hasex | WT_veg | OK     | 28,8409  | 3,35179  | -3,10511      | 5,62252       | 1,8819E-08 | 5,1256E-07 | yes |
| pdMA   | ChrVII_A_nidulans_FGSC_A4:2193338-2194937  | WT_5hasex | WT_veg | OK     | 188,276  | 110,071  | -0,774418     | 1,56253       | 0,118163   | 0,324358   | no  |
| pelA   | ChrVIII_A_nidulans_FGSC_A4:2610238-2611336 | WT_5hasex | WT_veg | OK     | 2,14585  | 7,6391   | 1,83186       | -2,15832      | 0,0309027  | 0,124203   | no  |
| pelB   | ChrVII_A_nidulans_FGSC_A4:4380835-4382249  | WT_5hasex | WT_veg | NOTEST | 1,01181  | 0        | -1.79769e+308 | -1.79769e+308 | 0,0437113  | 1          | no  |
| pelC   | ChrVIII_A_nidulans_FGSC_A4:1473209-1474507 | WT_5hasex | WT_veg | OK     | 4,2865   | 2,07747  | -1,04497      | 1,16517       | 0,243949   | 0,511336   | no  |
| pelD   | ChrI_A_nidulans_FGSC_A4:3696893-3698186    | WT_5hasex | WT_veg | OK     | 1,96459  | 0,727079 | -1,43405      | 0,956114      | 0,339015   | 0,614971   | no  |
| pelF   | ChrIII_A_nidulans_FGSC_A4:682156-683885    | WT_5hasex | WT_veg | OK     | 5,20423  | 10,37    | 0,994657      | -1,48551      | 0,137408   | 0,358203   | no  |
| pepI   | ChrVI_A_nidulans_FGSC_A4:855101-856277     | WT_5hasex | WT_veg | OK     | 11,55    | 9,4417   | -0,290779     | 0,386716      | 0,698967   | 0,868767   | no  |
| pepJ   | ChrII_A_nidulans_FGSC_A4:333193-334709     | WT_5hasex | WT_veg | OK     | 104,548  | 26,3511  | -1,98822      | 4,08308       | 4,4444E-05 | 0,00054087 | yes |
| pepP   | ChrI_A_nidulans_FGSC_A4:2173205-2174809    | WT_5hasex | WT_veg | OK     | 109,161  | 174,331  | 0,675367      | -1,30278      | 0,192651   | 0,444238   | no  |
| pexA   | ChrI_A_nidulans_FGSC_A4:1567744-1571600    | WT_5hasex | WT_veg | OK     | 12,2593  | 10,5035  | -0,223016     | 0,442029      | 0,658468   | 0,846127   | no  |
| pexB   | ChrII_A_nidulans_FGSC_A4:2217020-2218404   | WT_5hasex | WT_veg | OK     | 17,0264  | 10,097   | -0,753847     | 1,32332       | 0,185728   | 0,434666   | no  |
| pexC   | ChrVII_A_nidulans_FGSC_A4:3426987-3429025  | WT_5hasex | WT_veg | OK     | 59,9158  | 54,9677  | -0,124351     | 0,251301      | 0,801581   | 0,91987    | no  |
| pexE   | ChrVII_A_nidulans_FGSC_A4:1043253-1045280  | WT_5hasex | WT_veg | OK     | 44,8092  | 51,8285  | 0,20995       | -0,433627     | 0,664559   | 0,849948   | no  |
| pexF   | ChrVI_A_nidulans_FGSC_A4:2374541-2379250   | WT_5hasex | WT_veg | OK     | 14,8245  | 11,1189  | -0,414966     | 0,849117      | 0,395816   | 0,668974   | no  |
| pexG   | ChrVIII_A_nidulans_FGSC_A4:2186058-2187185 | WT_5hasex | WT_veg | OK     | 16,9314  | 20,5456  | 0,279131      | -0,479139     | 0,631839   | 0,831394   | no  |
| pexK   | ChrVII_A_nidulans_FGSC_A4:2265359-2266501  | WT_5hasex | WT_veg | OK     | 99,4297  | 165,871  | 0,738313      | -1,48538      | 0,137442   | 0,358232   | no  |
| pexM   | ChrVII_A_nidulans_FGSC_A4:1017702-1019416  | WT_5hasex | WT_veg | OK     | 75,9078  | 168,379  | 1,14939       | -2,32672      | 0,01998    | 0,0890866  | no  |
| pfkA   | ChrVI_A_nidulans_FGSC_A4:1415252-1418027   | WT_5hasex | WT_veg | OK     | 734,302  | 701,673  | -0,0655749    | 0,103983      | 0,917183   | 0,968489   | no  |
| pfkZ   | ChrV_A_nidulans_FGSC_A4:1281908-1284937    | WT_5hasex | WT_veg | OK     | 419,076  | 197,799  | -1,08318      | 1,83998       | 0,0657708  | 0,215637   | no  |
| pgaB   | ChrIII_A_nidulans_FGSC_A4:2234981-2236137  | WT_5hasex | WT_veg | OK     | 42,3431  | 308,877  | 2,86683       | -5,24124      | 1,595E-07  | 3,5402E-06 | yes |
| pgaC   | ChrV_A_nidulans_FGSC_A4:142833-144133      | WT_5hasex | WT_veg | OK     | 21,7968  | 5,19063  | -2,07013      | 3,09336       | 0,00197902 | 0,0138624  | yes |
| pgaD   | ChrI_A_nidulans_FGSC_A4:2748233-2749923    | WT_5hasex | WT_veg | NOTEST | 0,519936 | 0,221018 | -1,23417      | 0,70254       | 0,482342   | 1          | no  |
| pgkA   | ChrVIII_A_nidulans_FGSC_A4:1063730-1065224 | WT_5hasex | WT_veg | OK     | 1519,61  | 3180,73  | 1,06565       | -1,62212      | 0,104779   | 0,299198   | no  |
| pgmA   | ChrVI_A_nidulans_FGSC_A4:1975032-1976807   | WT_5hasex | WT_veg | OK     | 252,379  | 1939,98  | 2,94238       | -5,44826      | 5,0866E-08 | 1,2663E-06 | yes |

## Supplementary table 1

|       |                                            |           |        |        |          |          |               |               |            |            |      |
|-------|--------------------------------------------|-----------|--------|--------|----------|----------|---------------|---------------|------------|------------|------|
| pgmB  | ChrVI_A_nidulans_FGSC_A4:2562807-2564694   | WT_5hasex | WT_veg | OK     | 241,353  | 450,601  | 0,900706      | -1,66167      | 0,0965794  | 0,282325   | no   |
| pgxA  | ChrIII_A_nidulans_FGSC_A4:2894677-2896316  | WT_5hasex | WT_veg | NOTEST | 0,502037 | 2,5066   | 2,31987       | -2,00556      | 0,0449027  |            | 1 no |
| pgxB  | ChrVII_A_nidulans_FGSC_A4:538411-540264    | WT_5hasex | WT_veg | NOTEST | 0,922678 | 0,980176 | 0,0872138     | -0,0734468    | 0,941451   |            | 1 no |
| pgxD  | ChrVII_A_nidulans_FGSC_A4:49258-50724      | WT_5hasex | WT_veg | NOTEST | 0,129692 | 0        | -1.79769e+308 | -1.79769e+308 | 0,165569   |            | 1 no |
| phacA | ChrII_A_nidulans_FGSC_A4:682980-684833     | WT_5hasex | WT_veg | OK     | 14,8633  | 21,7586  | 0,549832      | -1,00775      | 0,313577   | 0,589638   | no   |
| phacB | ChrVIII_A_nidulans_FGSC_A4:638517-640293   | WT_5hasex | WT_veg | OK     | 34,7747  | 43,8528  | 0,334631      | -0,672225     | 0,501441   | 0,750714   | no   |
| phbA  | ChrI_A_nidulans_FGSC_A4:1341885-1343186    | WT_5hasex | WT_veg | OK     | 356,419  | 422,75   | 0,24623       | -0,455332     | 0,64887    | 0,840907   | no   |
| phbB  | ChrI_A_nidulans_FGSC_A4:3402197-3403123    | WT_5hasex | WT_veg | OK     | 20,448   | 71,933   | 1,81469       | -2,96592      | 0,00301778 | 0,0196395  | yes  |
| phenA | ChrIII_A_nidulans_FGSC_A4:2593480-2594644  | WT_5hasex | WT_veg | OK     | 33,8138  | 62,3007  | 0,881635      | -1,72362      | 0,0847768  | 0,258253   | no   |
| phiA  | ChrV_A_nidulans_FGSC_A4:156984-157735      | WT_5hasex | WT_veg | OK     | 188,471  | 9,37504  | -4,32938      | 6,80749       | 9,9316E-12 | 4,7485E-10 | yes  |
| phk   | ChrIII_A_nidulans_FGSC_A4:578144-580985    | WT_5hasex | WT_veg | OK     | 24,2712  | 137,925  | 2,50656       | -5,2008       | 1,9844E-07 | 4,3237E-06 | yes  |
| phkA  | ChrVI_A_nidulans_FGSC_A4:1817696-1825399   | WT_5hasex | WT_veg | OK     | 33,0884  | 47,1918  | 0,512212      | -1,05071      | 0,293394   | 0,568181   | no   |
| phkB  | ChrVI_A_nidulans_FGSC_A4:1828387-1834151   | WT_5hasex | WT_veg | OK     | 32,8472  | 138,462  | 2,07565       | -4,23407      | 2,295E-05  | 0,00030126 | yes  |
| phnA  | ChrVIII_A_nidulans_FGSC_A4:4667704-4668961 | WT_5hasex | WT_veg | OK     | 46,2355  | 79,7717  | 0,786878      | -1,5978       | 0,110087   | 0,309451   | no   |
| phnB  | ChrIII_A_nidulans_FGSC_A4:1660805-1662100  | WT_5hasex | WT_veg | OK     | 42,4571  | 42,8295  | 0,0125978     | -0,0251011    | 0,979974   | 0,993031   | no   |
| phnC  | ChrIII_A_nidulans_FGSC_A4:2606095-2606847  | WT_5hasex | WT_veg | OK     | 41,8741  | 79,9225  | 0,932544      | -1,77194      | 0,0764043  | 0,239946   | no   |
| pho8  | ChrIII_A_nidulans_FGSC_A4:1800922-1803057  | WT_5hasex | WT_veg | OK     | 57,3689  | 191,832  | 1,7415        | -3,38488      | 0,0007121  | 0,00587828 | yes  |
| pho80 | ChrV_A_nidulans_FGSC_A4:1316006-1317687    | WT_5hasex | WT_veg | OK     | 95,4488  | 286,736  | 1,58692       | -3,22043      | 0,00127997 | 0,0096203  | yes  |
| phoA  | ChrII_A_nidulans_FGSC_A4:1314064-1315312   | WT_5hasex | WT_veg | OK     | 48,0296  | 232,21   | 2,27343       | -4,53867      | 5,661E-06  | 8,6537E-05 | yes  |
| phoB  | ChrVII_A_nidulans_FGSC_A4:2102025-2103382  | WT_5hasex | WT_veg | OK     | 10,7594  | 16,2656  | 0,59623       | -0,969487     | 0,332302   | 0,608687   | no   |
| pigP  | ChrII_A_nidulans_FGSC_A4:656021-657152     | WT_5hasex | WT_veg | OK     | 23,7245  | 32,0327  | 0,43317       | -0,785746     | 0,432016   | 0,698411   | no   |
| pilA  | ChrV_A_nidulans_FGSC_A4:1523652-1525517    | WT_5hasex | WT_veg | OK     | 622,317  | 3518,63  | 2,49929       | -3,6094       | 0,00030691 | 0,00287597 | yes  |
| pilB  | ChrII_A_nidulans_FGSC_A4:2613540-2615358   | WT_5hasex | WT_veg | OK     | 2,95369  | 4,69138  | 0,667492      | -0,919771     | 0,357693   | 0,632824   | no   |
| pinA  | ChrI_A_nidulans_FGSC_A4:1100804-1101841    | WT_5hasex | WT_veg | OK     | 151,872  | 402,915  | 1,40762       | -2,88874      | 0,00386793 | 0,0241381  | yes  |
| pkA   | ChrI_A_nidulans_FGSC_A4:604438-606018      | WT_5hasex | WT_veg | OK     | 76,228   | 117,653  | 0,626146      | -1,26125      | 0,207219   | 0,464384   | no   |
| pkAB  | ChrIII_A_nidulans_FGSC_A4:1198467-1199838  | WT_5hasex | WT_veg | OK     | 43,2745  | 101,087  | 1,22401       | -2,47477      | 0,0133323  | 0,0653633  | no   |
| pkAR  | ChrIII_A_nidulans_FGSC_A4:364998-366677    | WT_5hasex | WT_veg | OK     | 87,0289  | 155,597  | 0,838248      | -1,72266      | 0,0849504  | 0,258602   | no   |
| pkcA  | ChrVIII_A_nidulans_FGSC_A4:4594432-4598641 | WT_5hasex | WT_veg | OK     | 64,5146  | 256,832  | 1,99313       | -3,89703      | 9,738E-05  | 0,00107047 | yes  |
| pkcB  | ChrI_A_nidulans_FGSC_A4:1627339-1630007    | WT_5hasex | WT_veg | OK     | 89,6701  | 218,29   | 1,28354       | -2,6259       | 0,00864213 | 0,0464001  | yes  |
| pkIA  | ChrV_A_nidulans_FGSC_A4:1493621-1496032    | WT_5hasex | WT_veg | OK     | 447,652  | 732,889  | 0,711217      | -1,26988      | 0,204126   | 0,460306   | no   |
| plA   | ChrI_A_nidulans_FGSC_A4:900491-903212      | WT_5hasex | WT_veg | OK     | 218,331  | 458,336  | 1,06989       | -1,72244      | 0,0849905  | 0,258664   | no   |
| plcB  | ChrIV_A_nidulans_FGSC_A4:2391258-2392674   | WT_5hasex | WT_veg | OK     | 8,13441  | 8,70862  | 0,0984063     | -0,152        | 0,879187   | 0,953972   | no   |
| pldA  | ChrI_A_nidulans_FGSC_A4:2940007-2943407    | WT_5hasex | WT_veg | OK     | 85,6029  | 480,539  | 2,48892       | -4,73743      | 2,1645E-06 | 3,6874E-05 | yes  |
| plkA  | ChrVII_A_nidulans_FGSC_A4:1174384-1177904  | WT_5hasex | WT_veg | OK     | 18,2292  | 23,9391  | 0,393117      | -0,805748     | 0,420388   | 0,688563   | no   |
| plyA  | ChrIV_A_nidulans_FGSC_A4:2244463-2245716   | WT_5hasex | WT_veg | OK     | 4,59273  | 13,3875  | 1,54347       | -2,07859      | 0,037655   | 0,144187   | no   |
| plyC  | ChrV_A_nidulans_FGSC_A4:3119932-3121410    | WT_5hasex | WT_veg | OK     | 11,568   | 15,9788  | 0,46602       | -0,784803     | 0,432569   | 0,698721   | no   |
| plyD  | ChrVII_A_nidulans_FGSC_A4:4278463-4279384  | WT_5hasex | WT_veg | NOTEST | 0        | 0        | 0             | 0             | 1          | 1          | no   |
| plyE  | ChrVI_A_nidulans_FGSC_A4:1055126-1055947   | WT_5hasex | WT_veg | NOTEST | 0        | 0        | 0             | 0             | 1          | 1          | no   |
| plyF  | ChrI_A_nidulans_FGSC_A4:1237332-1238235    | WT_5hasex | WT_veg | OK     | 5,89841  | 6,87192  | 0,220386      | -0,2803       | 0,779248   | 0,909688   | no   |
| plyG  | ChrI_A_nidulans_FGSC_A4:3052619-3053463    | WT_5hasex | WT_veg | NOTEST | 0,235353 | 0        | -1.79769e+308 | -1.79769e+308 | 0,165569   |            | 1 no |
| plyH  | ChrV_A_nidulans_FGSC_A4:536668-537719      | WT_5hasex | WT_veg | NOTEST | 1,37471  | 0        | -1.79769e+308 | -1.79769e+308 | 0,0372945  |            | 1 no |
| pmaA  | ChrIII_A_nidulans_FGSC_A4:745253-748876    | WT_5hasex | WT_veg | OK     | 1874,88  | 6292,36  | 1,7468        | -1,88232      | 0,0597926  | 0,201755   | no   |
| pmcA  | ChrVIII_A_nidulans_FGSC_A4:1245500-1249942 | WT_5hasex | WT_veg | OK     | 23,3148  | 28,9472  | 0,312178      | -0,605016     | 0,545169   | 0,779065   | no   |
| pmcB  | ChrIII_A_nidulans_FGSC_A4:553962-557728    | WT_5hasex | WT_veg | OK     | 19,3587  | 68,899   | 1,8315        | -3,78669      | 0,00015267 | 0,00157825 | yes  |
| pmeA  | ChrVI_A_nidulans_FGSC_A4:864709-865863     | WT_5hasex | WT_veg | OK     | 4,12418  | 4,0201   | -0,036876     | 0,0441481     | 0,964786   | 0,987164   | no   |
| pmeB  | ChrIII_A_nidulans_FGSC_A4:742787-744000    | WT_5hasex | WT_veg | OK     | 8,39922  | 14,9939  | 0,836048      | -1,2678       | 0,204869   | 0,461198   | no   |
| pmrA  | ChrIV_A_nidulans_FGSC_A4:1622789-1626089   | WT_5hasex | WT_veg | OK     | 18,0689  | 20,958   | 0,213992      | -0,437333     | 0,66187    | 0,848293   | no   |
| pmtA  | ChrV_A_nidulans_FGSC_A4:1173457-1176143    | WT_5hasex | WT_veg | OK     | 112,614  | 174,604  | 0,632697      | -1,2696       | 0,204227   | 0,460404   | no   |
| pmtB  | ChrIII_A_nidulans_FGSC_A4:1075964-1079008  | WT_5hasex | WT_veg | OK     | 38,8132  | 47,8972  | 0,303395      | -0,620076     | 0,535207   | 0,772784   | no   |
| pmtC  | ChrVII_A_nidulans_FGSC_A4:844009-846479    | WT_5hasex | WT_veg | OK     | 93,2997  | 111,536  | 0,257561      | -0,530794     | 0,595562   | 0,81034    | no   |
| pnpA  | ChrVII_A_nidulans_FGSC_A4:2704765-2706268  | WT_5hasex | WT_veg | OK     | 48,911   | 113,429  | 1,21356       | -2,44612      | 0,0144402  | 0,0694919  | no   |
| podG  | ChrI_A_nidulans_FGSC_A4:748538-750089      | WT_5hasex | WT_veg | OK     | 28,533   | 35,5472  | 0,317102      | -0,620426     | 0,534977   | 0,722628   | no   |
| podH  | ChrVI_A_nidulans_FGSC_A4:2448719-2452095   | WT_5hasex | WT_veg | OK     | 59,3816  | 71,2066  | 0,261993      | -0,539105     | 0,589814   | 0,807094   | no   |

## Supplementary table 1

|         |                                            |           |        |        |          |         |           |           |            |            |     |
|---------|--------------------------------------------|-----------|--------|--------|----------|---------|-----------|-----------|------------|------------|-----|
| pom152  | ChrVI_A_nidulans_FGSC_A4:664344-668303     | WT_5hasex | WT_veg | OK     | 38,2523  | 82,2927 | 1,10522   | -2,30061  | 0,0214137  | 0,0938701  | no  |
| pom34   | ChrIII_A_nidulans_FGSC_A4:2745598-2746624  | WT_5hasex | WT_veg | OK     | 93,1446  | 84,3297 | -0,143431 | 0,292173  | 0,770154   | 0,905596   | no  |
| ppgA    | ChrV_A_nidulans_FGSC_A4:1695653-1696040    | WT_5hasex | WT_veg | OK     | 22,0834  | 87,9935 | 1,99443   | -3,05369  | 0,00226046 | 0,0154698  | yes |
| pphA    | ChrI_A_nidulans_FGSC_A4:324376-326050      | WT_5hasex | WT_veg | OK     | 109,65   | 164,34  | 0,58377   | -1,19392  | 0,232508   | 0,496997   | no  |
| ppoA    | ChrVII_A_nidulans_FGSC_A4:2422295-2425863  | WT_5hasex | WT_veg | OK     | 33,5492  | 131,365 | 1,96923   | -4,10216  | 4,0932E-05 | 0,00050314 | yes |
| ppoB    | ChrI_A_nidulans_FGSC_A4:546721-550918      | WT_5hasex | WT_veg | NOTEST | 1,71258  | 1,92294 | 0,16714   | -0,224945 | 0,822022   | 1          | no  |
| ppoC    | ChrIII_A_nidulans_FGSC_A4:237310-241516    | WT_5hasex | WT_veg | OK     | 182,853  | 262,722 | 0,522848  | -0,971582 | 0,331259   | 0,607627   | no  |
| pppA    | ChrVIII_A_nidulans_FGSC_A4:4173432-4174875 | WT_5hasex | WT_veg | OK     | 711,613  | 1769,06 | 1,31382   | -2,33938  | 0,0193159  | 0,0866378  | no  |
| preA    | ChrIV_A_nidulans_FGSC_A4:2561786-2563335   | WT_5hasex | WT_veg | OK     | 2,7752   | 5,4137  | 0,964025  | -1,26215  | 0,206895   | 0,463855   | no  |
| preB    | ChrVII_A_nidulans_FGSC_A4:4212753-4213958  | WT_5hasex | WT_veg | OK     | 10,5109  | 18,6573 | 0,827851  | -1,33128  | 0,183097   | 0,430826   | no  |
| prnA    | ChrVII_A_nidulans_FGSC_A4:1732913-1736027  | WT_5hasex | WT_veg | OK     | 15,8358  | 24,6013 | 0,63555   | -1,22654  | 0,219996   | 0,481333   | no  |
| prnB    | ChrVII_A_nidulans_FGSC_A4:1741378-1743180  | WT_5hasex | WT_veg | OK     | 10,3431  | 12,0543 | 0,220891  | -0,364548 | 0,715449   | 0,877824   | no  |
| prnC    | ChrVII_A_nidulans_FGSC_A4:1743861-1745729  | WT_5hasex | WT_veg | OK     | 27,8635  | 44,4165 | 0,672716  | -1,12264  | 0,261589   | 0,532258   | no  |
| prnD    | ChrVII_A_nidulans_FGSC_A4:1738096-1739715  | WT_5hasex | WT_veg | OK     | 21,6709  | 38,4632 | 0,827719  | -1,40758  | 0,159256   | 0,394377   | no  |
| prnX    | ChrVII_A_nidulans_FGSC_A4:1736748-1737864  | WT_5hasex | WT_veg | OK     | 13,8271  | 18,9121 | 0,451808  | -0,763737 | 0,445024   | 0,708452   | no  |
| pro     | Contig-mt188_A_nidulans_FGSC_A4:4041-4113  | WT_5hasex | WT_veg | NOTEST | 0        | 0       | 0         | 0         | 1          | 1          | no  |
| prp8    | ChrIII_A_nidulans_FGSC_A4:1766887-1775944  | WT_5hasex | WT_veg | OK     | 21,278   | 52,3613 | 1,29914   | -2,67046  | 0,00757478 | 0,0417521  | yes |
| prpA    | ChrVI_A_nidulans_FGSC_A4:1731681-1734014   | WT_5hasex | WT_veg | OK     | 25,7782  | 171,674 | 2,73545   | -5,439    | 5,3581E-08 | 1,3288E-06 | yes |
| prtA    | ChrV_A_nidulans_FGSC_A4:2413829-2415477    | WT_5hasex | WT_veg | OK     | 1559     | 3279,8  | 1,07299   | -1,13461  | 0,25654    | 0,526359   | no  |
| prtB    | ChrI_A_nidulans_FGSC_A4:3480761-3482082    | WT_5hasex | WT_veg | OK     | 11,1077  | 18,6703 | 0,749182  | -1,20826  | 0,226946   | 0,489834   | no  |
| prxA    | ChrIII_A_nidulans_FGSC_A4:3111904-3112533  | WT_5hasex | WT_veg | OK     | 2124,05  | 3479,77 | 0,712174  | -1,2015   | 0,229556   | 0,492901   | no  |
| ptkA    | ChrIII_A_nidulans_FGSC_A4:2556913-2559245  | WT_5hasex | WT_veg | OK     | 48,2749  | 131,975 | 1,45092   | -3,01913  | 0,00253505 | 0,0170136  | yes |
| ptpA    | ChrIV_A_nidulans_FGSC_A4:1402143-1404770   | WT_5hasex | WT_veg | OK     | 83,9597  | 412,83  | 2,29778   | -4,64582  | 3,3873E-06 | 5,475E-05  | yes |
| pttA    | ChrIII_A_nidulans_FGSC_A4:1757523-1760027  | WT_5hasex | WT_veg | OK     | 31,2377  | 63,0978 | 1,0143    | -2,00459  | 0,0450074  | 0,164606   | no  |
| purH    | ChrIII_A_nidulans_FGSC_A4:1971353-1973669  | WT_5hasex | WT_veg | OK     | 88,5778  | 128,313 | 0,53465   | -1,08408  | 0,27833    | 0,551586   | no  |
| pycA    | ChrIII_A_nidulans_FGSC_A4:1981759-1985716  | WT_5hasex | WT_veg | OK     | 142,538  | 292,919 | 1,03916   | -1,9747   | 0,0483025  | 0,173366   | no  |
| pyrABCN | ChrVIII_A_nidulans_FGSC_A4:3153607-3160488 | WT_5hasex | WT_veg | OK     | 17,9942  | 139,166 | 2,9512    | -6,10872  | 1,0043E-09 | 3,5488E-08 | yes |
| pyrD    | ChrIII_A_nidulans_FGSC_A4:1945429-1946879  | WT_5hasex | WT_veg | OK     | 29,0536  | 41,3108 | 0,507803  | -0,973596 | 0,330257   | 0,606646   | no  |
| pyrE    | ChrI_A_nidulans_FGSC_A4:1839228-1841181    | WT_5hasex | WT_veg | OK     | 42,5051  | 35,1506 | -0,274084 | 0,560529  | 0,575119   | 0,798292   | no  |
| pyrF    | ChrI_A_nidulans_FGSC_A4:1922525-1923358    | WT_5hasex | WT_veg | OK     | 55,2052  | 99,5145 | 0,850104  | -1,65769  | 0,0973809  | 0,283939   | no  |
| pyrG    | ChrI_A_nidulans_FGSC_A4:1062884-1063768    | WT_5hasex | WT_veg | OK     | 59,6031  | 75,4839 | 0,340781  | -0,676557 | 0,498687   | 0,748774   | no  |
| pyroA   | ChrIV_A_nidulans_FGSC_A4:2484766-2486046   | WT_5hasex | WT_veg | OK     | 70,3308  | 304,494 | 2,11419   | -4,16919  | 3,0569E-05 | 0,00038981 | yes |
| qutA    | ChrVIII_A_nidulans_FGSC_A4:1416786-1419264 | WT_5hasex | WT_veg | OK     | 4,3642   | 5,98105 | 0,454684  | -0,721357 | 0,47069    | 0,728383   | no  |
| qutB    | ChrVIII_A_nidulans_FGSC_A4:1413306-1414296 | WT_5hasex | WT_veg | OK     | 12,4105  | 5,48653 | -1,17759  | 1,69364   | 0,0903345  | 0,269835   | no  |
| qutC    | ChrVIII_A_nidulans_FGSC_A4:1407966-1409100 | WT_5hasex | WT_veg | OK     | 0,913222 | 6,50386 | 2,83226   | -2,75972  | 0,00578503 | 0,0335229  | yes |
| qutD    | ChrVIII_A_nidulans_FGSC_A4:1411157-1412862 | WT_5hasex | WT_veg | OK     | 1,88301  | 3,88887 | 1,04631   | -1,34777  | 0,177731   | 0,422765   | no  |
| qutE    | ChrVIII_A_nidulans_FGSC_A4:1416019-1416481 | WT_5hasex | WT_veg | OK     | 6,10302  | 7,85613 | 0,364297  | -0,40947  | 0,682195   | 0,859733   | no  |
| qutG    | ChrVIII_A_nidulans_FGSC_A4:1414351-1415560 | WT_5hasex | WT_veg | OK     | 1,21694  | 7,51576 | 2,62666   | -3,06468  | 0,00217903 | 0,0150165  | yes |
| qutH    | ChrVIII_A_nidulans_FGSC_A4:1409709-1410981 | WT_5hasex | WT_veg | OK     | 4,4158   | 5,1934  | 0,234003  | -0,320577 | 0,748531   | 0,894876   | no  |
| qutR    | ChrVIII_A_nidulans_FGSC_A4:1423154-1425860 | WT_5hasex | WT_veg | OK     | 7,09333  | 7,7687  | 0,13121   | -0,229436 | 0,81853    | 0,927368   | no  |
| racA    | ChrIII_A_nidulans_FGSC_A4:1120421-1122031  | WT_5hasex | WT_veg | OK     | 73,8288  | 186,686 | 1,33836   | -2,67452  | 0,00748373 | 0,0413281  | yes |
| radC    | ChrIII_A_nidulans_FGSC_A4:2137381-2139382  | WT_5hasex | WT_veg | OK     | 11,4158  | 23,1284 | 1,01863   | -1,82396  | 0,0681585  | 0,221291   | no  |
| ran     | ChrV_A_nidulans_FGSC_A4:2667877-2669388    | WT_5hasex | WT_veg | OK     | 610,514  | 1652,71 | 1,43673   | -2,63381  | 0,00844336 | 0,0455241  | yes |
| ranGAP  | ChrIII_A_nidulans_FGSC_A4:738326-739684    | WT_5hasex | WT_veg | OK     | 50,2174  | 61,8304 | 0,30013   | -0,613575 | 0,539496   | 0,775134   | no  |
| rasA    | ChrVIII_A_nidulans_FGSC_A4:4350030-4351711 | WT_5hasex | WT_veg | OK     | 133,953  | 194,593 | 0,538733  | -1,10985  | 0,267063   | 0,538657   | no  |
| rasB    | ChrI_A_nidulans_FGSC_A4:2108691-2110350    | WT_5hasex | WT_veg | OK     | 30,1059  | 38,9158 | 0,37031   | -0,750319 | 0,453062   | 0,714478   | no  |
| rcc1    | ChrIV_A_nidulans_FGSC_A4:1413599-1415521   | WT_5hasex | WT_veg | OK     | 107,39   | 205,378 | 0,935422  | -1,90277  | 0,0570705  | 0,19493    | no  |
| rcnA    | ChrI_A_nidulans_FGSC_A4:758751-760166      | WT_5hasex | WT_veg | OK     | 231,732  | 1333,37 | 2,52455   | -4,21368  | 2,5124E-05 | 0,00032671 | yes |
| rcoA    | ChrI_A_nidulans_FGSC_A4:2314051-2316648    | WT_5hasex | WT_veg | OK     | 105,882  | 174,714 | 0,722539  | -1,4836   | 0,137915   | 0,358964   | no  |
| recQ    | ChrIII_A_nidulans_FGSC_A4:2066103-2068009  | WT_5hasex | WT_veg | OK     | 7,10257  | 10,177  | 0,518905  | -0,837283 | 0,402434   | 0,673802   | no  |
| rfeA    | ChrVI_A_nidulans_FGSC_A4:2316735-2318583   | WT_5hasex | WT_veg | OK     | 727,688  | 552     | -0,39865  | 0,670353  | 0,502633   | 0,751618   | no  |
| rfeB    | ChrVII_A_nidulans_FGSC_A4:2544338-2547443  | WT_5hasex | WT_veg | OK     | 127,255  | 94,9174 | -0,422982 | 0,841058  | 0,400315   | 0,672477   | no  |
| rfeE    | ChrVIII_A_nidulans_FGSC_A4:1911131-1914142 | WT_5hasex | WT_veg | OK     | 12,2352  | 22,7988 | 0,897917  | -1,77204  | 0,0763878  | 0,239909   | no  |

## Supplementary table 1

|        |                                            |           |        |        |          |           |               |               |            |            |     |
|--------|--------------------------------------------|-----------|--------|--------|----------|-----------|---------------|---------------|------------|------------|-----|
| rfeF   | ChrVII_A_nidulans_FGSC_A4:2561427-2564255  | WT_5hasex | WT_veg | OK     | 372,102  | 986,032   | 1,40594       | -2,54393      | 0,0109614  | 0,0559791  | no  |
| rglA   | ChrIV_A_nidulans_FGSC_A4:888602-890710     | WT_5hasex | WT_veg | OK     | 2,35264  | 2,51418   | 0,0958066     | -0,108233     | 0,913811   | 0,967205   | no  |
| rglB   | ChrI_A_nidulans_FGSC_A4:314755-316887      | WT_5hasex | WT_veg | NOTEST | 1,29308  | 3,80646   | 1,55764       | -1,99202      | 0,0463692  | 1          | no  |
| rglC   | ChrII_A_nidulans_FGSC_A4:1971548-1973528   | WT_5hasex | WT_veg | NOTEST | 0        | 0,0837039 | 1.79769e+308  | 1.79769e+308  | 0,309884   | 1          | no  |
| rglD   | ChrII_A_nidulans_FGSC_A4:2539109-2540937   | WT_5hasex | WT_veg | NOTEST | 0,150017 | 0         | -1.79769e+308 | -1.79769e+308 | 0,224063   | 1          | no  |
| rgsA   | ChrV_A_nidulans_FGSC_A4:1798024-1800000    | WT_5hasex | WT_veg | OK     | 319,898  | 822,21    | 1,36189       | -2,53244      | 0,0113273  | 0,057461   | no  |
| rgsB   | ChrII_A_nidulans_FGSC_A4:3565346-3567030   | WT_5hasex | WT_veg | OK     | 71,1376  | 155,845   | 1,13143       | -2,33195      | 0,0197031  | 0,0881109  | no  |
| rgsC   | ChrVIII_A_nidulans_FGSC_A4:692053-695781   | WT_5hasex | WT_veg | OK     | 22,2385  | 19,9115   | -0,159457     | 0,328521      | 0,742518   | 0,891764   | no  |
| rhaA   | ChrVII_A_nidulans_FGSC_A4:3199571-3201706  | WT_5hasex | WT_veg | NOTEST | 0,118391 | 0,40427   | 1,77175       | -0,779365     | 0,435765   | 1          | no  |
| rhaB   | ChrVIII_A_nidulans_FGSC_A4:2704941-2707629 | WT_5hasex | WT_veg | OK     | 7,66261  | 2,86752   | -1,41803      | 2,33022       | 0,0197943  | 0,0884205  | no  |
| rhaC   | ChrV_A_nidulans_FGSC_A4:3199066-3201820    | WT_5hasex | WT_veg | OK     | 4,51176  | 4,87624   | 0,112079      | -0,176134     | 0,860189   | 0,945894   | no  |
| rhaE   | ChrIV_A_nidulans_FGSC_A4:850090-852786     | WT_5hasex | WT_veg | NOTEST | 0        | 0         | 0             | 0             | 1          | 1          | no  |
| rhaF   | ChrV_A_nidulans_FGSC_A4:572002-574795      | WT_5hasex | WT_veg | NOTEST | 0,157639 | 0,289691  | 0,877893      | -0,514877     | 0,606639   | 1          | no  |
| rhaG   | ChrI_A_nidulans_FGSC_A4:3595125-3597650    | WT_5hasex | WT_veg | NOTEST | 0,385242 | 0,147676  | -1,38333      | 0,827913      | 0,40772    | 1          | no  |
| rhbA   | ChrIII_A_nidulans_FGSC_A4:2550568-2551498  | WT_5hasex | WT_veg | OK     | 186,587  | 474,157   | 1,34551       | -2,79923      | 0,00512251 | 0,0303174  | yes |
| rhgA   | ChrVI_A_nidulans_FGSC_A4:340351-342037     | WT_5hasex | WT_veg | OK     | 8,95576  | 9,17188   | 0,0344031     | -0,0562309    | 0,955158   | 0,983363   | no  |
| rhgB   | ChrVII_A_nidulans_FGSC_A4:3202232-3203794  | WT_5hasex | WT_veg | NOTEST | 0,84702  | 1,92664   | 1,18562       | -1,15531      | 0,247963   | 1          | no  |
| rho4   | ChrVI_A_nidulans_FGSC_A4:3145723-3147169   | WT_5hasex | WT_veg | OK     | 47,191   | 67,3633   | 0,513453      | -1,05438      | 0,291707   | 0,56636    | no  |
| rhoA   | ChrV_A_nidulans_FGSC_A4:1835129-1837050    | WT_5hasex | WT_veg | OK     | 512,986  | 1286,38   | 1,32633       | -2,34805      | 0,0188721  | 0,0851355  | no  |
| riboB  | ChrVIII_A_nidulans_FGSC_A4:2832399-2833868 | WT_5hasex | WT_veg | OK     | 47,6239  | 63,5638   | 0,416519      | -0,854102     | 0,393048   | 0,666279   | no  |
| riboG  | ChrV_A_nidulans_FGSC_A4:1691293-1693540    | WT_5hasex | WT_veg | OK     | 205,9    | 339,842   | 0,722919      | -1,44027      | 0,14979    | 0,378609   | no  |
| rlmA   | ChrVI_A_nidulans_FGSC_A4:2172246-2174713   | WT_5hasex | WT_veg | OK     | 23,0996  | 42,7314   | 0,887427      | -1,81936      | 0,0688573  | 0,222856   | no  |
| rmtA   | ChrII_A_nidulans_FGSC_A4:1665856-1667343   | WT_5hasex | WT_veg | OK     | 65,3938  | 205,251   | 1,65016       | -3,38843      | 0,00070293 | 0,00581637 | yes |
| rmtB   | ChrVI_A_nidulans_FGSC_A4:1847169-1849174   | WT_5hasex | WT_veg | OK     | 27,007   | 63,7567   | 1,23924       | -2,39917      | 0,0164323  | 0,0767457  | no  |
| rmtC   | ChrVIII_A_nidulans_FGSC_A4:4491968-4495173 | WT_5hasex | WT_veg | OK     | 20,7408  | 38,1491   | 0,879175      | -1,79089      | 0,0733108  | 0,232899   | no  |
| roBA   | ChrIII_A_nidulans_FGSC_A4:3177901-3178693  | WT_5hasex | WT_veg | OK     | 57,9339  | 96,2638   | 0,732585      | -1,45752      | 0,144972   | 0,370902   | no  |
| rodA   | ChrIII_A_nidulans_FGSC_A4:2762001-2762880  | WT_5hasex | WT_veg | OK     | 93,0036  | 3,02418   | -4,94267      | 5,71989       | 1,066E-08  | 3,0708E-07 | yes |
| rosA   | ChrV_A_nidulans_FGSC_A4:1381977-1384246    | WT_5hasex | WT_veg | OK     | 10,0829  | 33,0763   | 1,71388       | -2,76894      | 0,00562397 | 0,0327198  | yes |
| rpDA   | ChrIII_A_nidulans_FGSC_A4:1870101-1872580  | WT_5hasex | WT_veg | OK     | 75,1819  | 125,234   | 0,736168      | -1,50946      | 0,131182   | 0,347199   | no  |
| rpl16A | ChrII_A_nidulans_FGSC_A4:1764042-1765494   | WT_5hasex | WT_veg | OK     | 1679,24  | 2192,25   | 0,3846        | -0,603753     | 0,546008   | 0,779595   | no  |
| rpl3   | ChrI_A_nidulans_FGSC_A4:928111-929752      | WT_5hasex | WT_veg | OK     | 1085,24  | 1995,92   | 0,87904       | -1,43025      | 0,152646   | 0,383606   | no  |
| rpl37  | ChrIII_A_nidulans_FGSC_A4:994285-995186    | WT_5hasex | WT_veg | OK     | 917,635  | 1576,34   | 0,780583      | -1,44976      | 0,147125   | 0,374581   | no  |
| rps16  | ChrII_A_nidulans_FGSC_A4:2207170-2208423   | WT_5hasex | WT_veg | OK     | 1083,49  | 1664,84   | 0,619706      | -1,07199      | 0,283724   | 0,55749    | no  |
| rrmA   | ChrVI_A_nidulans_FGSC_A4:463986-465451     | WT_5hasex | WT_veg | OK     | 29,9245  | 65,3174   | 1,12614       | -2,23797      | 0,0252232  | 0,106216   | no  |
| rrp5   | ChrVII_A_nidulans_FGSC_A4:3025906-3031458  | WT_5hasex | WT_veg | OK     | 15,4372  | 80,6074   | 2,3845        | -4,91846      | 8,7227E-07 | 1,6255E-05 | yes |
| rrpB   | ChrIII_A_nidulans_FGSC_A4:982401-986585    | WT_5hasex | WT_veg | OK     | 1,24478  | 4,57605   | 1,87821       | -2,60434      | 0,00920501 | 0,0487726  | yes |
| rrpC   | ChrVI_A_nidulans_FGSC_A4:3045803-3049694   | WT_5hasex | WT_veg | NOTEST | 0,258802 | 1,45972   | 2,49577       | -2,4045       | 0,0161948  | 1          | no  |
| rsdA   | ChrVII_A_nidulans_FGSC_A4:1052989-1056433  | WT_5hasex | WT_veg | OK     | 10,7396  | 61,2355   | 2,51143       | -4,31539      | 1,5932E-05 | 0,0002189  | yes |
| rsmA   | ChrIII_A_nidulans_FGSC_A4:1659438-1660536  | WT_5hasex | WT_veg | OK     | 16,4238  | 64,3574   | 1,97032       | -3,39594      | 0,00068393 | 0,00567883 | yes |
| sA     | ChrIII_A_nidulans_FGSC_A4:1047380-1048396  | WT_5hasex | WT_veg | OK     | 106,656  | 244,926   | 1,19938       | -2,47596      | 0,0132878  | 0,0651852  | no  |
| sB     | ChrVI_A_nidulans_FGSC_A4:2999696-3002423   | WT_5hasex | WT_veg | OK     | 8,51511  | 6,62492   | -0,362121     | 0,639736      | 0,522344   | 0,764792   | no  |
| sC     | ChrIII_A_nidulans_FGSC_A4:1051403-1053808  | WT_5hasex | WT_veg | OK     | 65,0162  | 78,0258   | 0,263153      | -0,545417     | 0,585467   | 0,804627   | no  |
| sD     | ChrVIII_A_nidulans_FGSC_A4:1232228-1232908 | WT_5hasex | WT_veg | OK     | 121,823  | 159,95    | 0,392831      | -0,786555     | 0,431543   | 0,697955   | no  |
| sac3   | ChrIV_A_nidulans_FGSC_A4:2486651-2490728   | WT_5hasex | WT_veg | OK     | 10,1104  | 22,3984   | 1,14755       | -2,24433      | 0,0248113  | 0,104742   | no  |
| sagA   | ChrVIII_A_nidulans_FGSC_A4:1774034-1775680 | WT_5hasex | WT_veg | OK     | 50,1141  | 56,3546   | 0,169316      | -0,347097     | 0,728519   | 0,885001   | no  |
| salA   | ChrVI_A_nidulans_FGSC_A4:893904-895429     | WT_5hasex | WT_veg | NOTEST | 0        | 0,572541  | 1.79769e+308  | 1.79769e+308  | 0,123323   | 1          | no  |
| samB   | ChrVIII_A_nidulans_FGSC_A4:4681461-4683862 | WT_5hasex | WT_veg | OK     | 146,839  | 153,221   | 0,061382      | -0,117733     | 0,906279   | 0,964044   | no  |
| sarA   | ChrVII_A_nidulans_FGSC_A4:3651922-3654048  | WT_5hasex | WT_veg | OK     | 15,7097  | 32,6656   | 1,05611       | -1,66497      | 0,0959182  | 0,281161   | no  |
| scaA   | ChrVI_A_nidulans_FGSC_A4:928930-930715     | WT_5hasex | WT_veg | OK     | 22,9535  | 44,1743   | 0,944491      | -1,87952      | 0,0601735  | 0,202675   | no  |
| scdA   | ChrVIII_A_nidulans_FGSC_A4:2361335-2363147 | WT_5hasex | WT_veg | OK     | 32,9794  | 31,6245   | -0,0605222    | 0,118528      | 0,905649   | 0,963925   | no  |
| scfA   | ChrVIII_A_nidulans_FGSC_A4:887334-889649   | WT_5hasex | WT_veg | OK     | 7,09193  | 7,1058    | 0,0028182     | -0,00468638   | 0,996261   | 0,998531   | no  |
| schA   | ChrII_A_nidulans_FGSC_A4:1650876-1654253   | WT_5hasex | WT_veg | OK     | 70,3291  | 260,279   | 1,88787       | -3,68111      | 0,00023222 | 0,00226521 | yes |
| sconB  | ChrI_A_nidulans_FGSC_A4:416628-419172      | WT_5hasex | WT_veg | OK     | 30,6169  | 56,0858   | 0,873307      | -1,81378      | 0,0697111  | 0,2248     | no  |

## Supplementary table 1

|       |                                            |           |        |        |          |         |               |               |            |            |     |
|-------|--------------------------------------------|-----------|--------|--------|----------|---------|---------------|---------------|------------|------------|-----|
| sconC | ChrVII_A_nidulans_FGSC_A4:3495101-3496041  | WT_5hasex | WT_veg | OK     | 349,274  | 796,846 | 1,18994       | -2,40474      | 0,0161839  | 0,0758765  | no  |
| sdpR  | ChrII_A_nidulans_FGSC_A4:4000030-4000891   | WT_5hasex | WT_veg | NOTEST | 0,234123 | 0       | -1.79769e+308 | -1.79769e+308 | 0,23809    | 1          | no  |
| sdeA  | ChrI_A_nidulans_FGSC_A4:3001976-3003856    | WT_5hasex | WT_veg | OK     | 793,825  | 3443,62 | 2,11703       | -3,21866      | 0,00128791 | 0,00967446 | yes |
| sdeB  | ChrII_A_nidulans_FGSC_A4:1981784-1983704   | WT_5hasex | WT_veg | OK     | 696,944  | 534,971 | -0,381581     | 0,585518      | 0,558199   | 0,787581   | no  |
| sds3  | ChrVI_A_nidulans_FGSC_A4:1575336-1577053   | WT_5hasex | WT_veg | OK     | 20,3349  | 62,0583 | 1,60967       | -3,13412      | 0,00172369 | 0,0123361  | yes |
| sec13 | ChrIII_A_nidulans_FGSC_A4:2411558-2413029  | WT_5hasex | WT_veg | OK     | 131,382  | 170,517 | 0,376151      | -0,773661     | 0,439131   | 0,703547   | no  |
| sec23 | ChrVIII_A_nidulans_FGSC_A4:4113268-4116051 | WT_5hasex | WT_veg | OK     | 84,9775  | 104,446 | 0,297609      | -0,595429     | 0,551557   | 0,783066   | no  |
| sec61 | ChrVIII_A_nidulans_FGSC_A4:3611575-3612270 | WT_5hasex | WT_veg | OK     | 135,415  | 85,1813 | -0,668776     | 1,34497       | 0,178636   | 0,424116   | no  |
| secC  | ChrVIII_A_nidulans_FGSC_A4:3481182-3486091 | WT_5hasex | WT_veg | OK     | 16,5115  | 24,5886 | 0,574515      | -1,18189      | 0,237248   | 0,50268    | no  |
| sed5  | ChrIII_A_nidulans_FGSC_A4:771503-773184    | WT_5hasex | WT_veg | OK     | 58,6565  | 115,475 | 0,977222      | -2,02947      | 0,0424109  | 0,157417   | no  |
| seh1  | ChrI_A_nidulans_FGSC_A4:1901829-1903041    | WT_5hasex | WT_veg | OK     | 9,99247  | 24,2432 | 1,27866       | -2,05485      | 0,0398934  | 0,150568   | no  |
| sepA  | ChrI_A_nidulans_FGSC_A4:2363250-2368685    | WT_5hasex | WT_veg | OK     | 11,3811  | 16,566  | 0,541587      | -1,10299      | 0,270032   | 0,542105   | no  |
| sepB  | ChrV_A_nidulans_FGSC_A4:1266366-1269339    | WT_5hasex | WT_veg | OK     | 23,0076  | 37,0156 | 0,686021      | -1,37321      | 0,169688   | 0,410299   | no  |
| sepH  | ChrIII_A_nidulans_FGSC_A4:2191134-2195675  | WT_5hasex | WT_veg | OK     | 25,0509  | 54,932  | 1,13278       | -2,33162      | 0,0197206  | 0,0881589  | no  |
| sepK  | ChrVII_A_nidulans_FGSC_A4:4003001-4008403  | WT_5hasex | WT_veg | OK     | 6,11565  | 13,6997 | 1,16357       | -2,22318      | 0,0262038  | 0,10943    | no  |
| sepM  | ChrVIII_A_nidulans_FGSC_A4:2876504-2877430 | WT_5hasex | WT_veg | OK     | 72,0636  | 53,9109 | -0,418694     | 0,800462      | 0,423443   | 0,691319   | no  |
| ser1  | Contig-mt188_A_nidulans_FGSC_A4:4131-4213  | WT_5hasex | WT_veg | NOTEST | 0        | 0       | 0             | 0             | 1          | 1          | no  |
| ser2  | Contig-mt188_A_nidulans_FGSC_A4:4527-4608  | WT_5hasex | WT_veg | NOTEST | 0        | 0       | 0             | 0             | 1          | 1          | no  |
| sfaD  | ChrVIII_A_nidulans_FGSC_A4:4669969-4671481 | WT_5hasex | WT_veg | OK     | 80,9504  | 118,645 | 0,551539      | -1,12054      | 0,262484   | 0,533232   | no  |
| sfga  | ChrII_A_nidulans_FGSC_A4:840092-842166     | WT_5hasex | WT_veg | OK     | 59,66    | 88,0508 | 0,561572      | -1,10908      | 0,267397   | 0,539136   | no  |
| sgdA  | ChrVIII_A_nidulans_FGSC_A4:3797354-3801144 | WT_5hasex | WT_veg | OK     | 138,824  | 382,434 | 1,46196       | -2,83494      | 0,00458342 | 0,0277376  | yes |
| sgdB  | ChrVI_A_nidulans_FGSC_A4:1804585-1806217   | WT_5hasex | WT_veg | OK     | 9,46564  | 15,4239 | 0,704399      | -1,17454      | 0,24018    | 0,505999   | no  |
| sgdC  | ChrIII_A_nidulans_FGSC_A4:2767483-2770110  | WT_5hasex | WT_veg | OK     | 27,4123  | 49,6286 | 0,856346      | -1,77041      | 0,0766586  | 0,240546   | no  |
| sgdD  | ChrVI_A_nidulans_FGSC_A4:786508-788523     | WT_5hasex | WT_veg | OK     | 26,4714  | 42,7246 | 0,690632      | -1,38836      | 0,165029   | 0,40305    | no  |
| sgdE  | ChrI_A_nidulans_FGSC_A4:1517782-1520435    | WT_5hasex | WT_veg | OK     | 472,338  | 1472,94 | 1,64081       | -2,67367      | 0,0075027  | 0,0414154  | yes |
| shoA  | ChrIV_A_nidulans_FGSC_A4:2412655-2414542   | WT_5hasex | WT_veg | OK     | 100,257  | 316,116 | 1,65675       | -3,35276      | 0,00080009 | 0,00649417 | yes |
| shrA  | ChrVII_A_nidulans_FGSC_A4:2046439-2047304  | WT_5hasex | WT_veg | OK     | 73,2199  | 102,801 | 0,489546      | -0,983196     | 0,325511   | 0,602139   | no  |
| sidA  | ChrI_A_nidulans_FGSC_A4:2141074-2142848    | WT_5hasex | WT_veg | OK     | 124,118  | 21,1218 | -2,55491      | 5,09189       | 3,5451E-07 | 7,2823E-06 | yes |
| sidB  | ChrIII_A_nidulans_FGSC_A4:2927755-2929998  | WT_5hasex | WT_veg | OK     | 43,0838  | 91,6069 | 1,08831       | -2,26372      | 0,0235912  | 0,100925   | no  |
| sidC  | ChrVIII_A_nidulans_FGSC_A4:2999412-3013925 | WT_5hasex | WT_veg | OK     | 3,67754  | 1,99965 | -0,878995     | 1,80783       | 0,0706337  | 0,227043   | no  |
| sitA  | ChrVIII_A_nidulans_FGSC_A4:3347060-3348645 | WT_5hasex | WT_veg | OK     | 47,8191  | 65,3064 | 0,449637      | -0,915276     | 0,360047   | 0,634703   | no  |
| slaB  | ChrVI_A_nidulans_FGSC_A4:2903570-2907341   | WT_5hasex | WT_veg | OK     | 103,892  | 246,742 | 1,24791       | -2,45957      | 0,0139102  | 0,0674693  | no  |
| sldA  | ChrII_A_nidulans_FGSC_A4:2554239-2558356   | WT_5hasex | WT_veg | OK     | 19,8071  | 36,3215 | 0,874808      | -1,80545      | 0,0710046  | 0,22778    | no  |
| sldB  | ChrVII_A_nidulans_FGSC_A4:3952869-3954113  | WT_5hasex | WT_veg | OK     | 65,4865  | 86,5032 | 0,401556      | -0,823126     | 0,410437   | 0,680384   | no  |
| sldI  | ChrII_A_nidulans_FGSC_A4:3571198-3575888   | WT_5hasex | WT_veg | OK     | 8,94963  | 21,4709 | 1,26248       | -2,50978      | 0,0120805  | 0,0604684  | no  |
| sItA  | ChrVI_A_nidulans_FGSC_A4:2396816-2399624   | WT_5hasex | WT_veg | OK     | 268,611  | 1357,64 | 2,33752       | -4,02392      | 5,7238E-05 | 0,00067371 | yes |
| smcB  | ChrI_A_nidulans_FGSC_A4:1859553-1863435    | WT_5hasex | WT_veg | OK     | 40,001   | 95,2495 | 1,25168       | -2,5563       | 0,0105791  | 0,0544511  | no  |
| smd1  | ChrVII_A_nidulans_FGSC_A4:2867071-2867733  | WT_5hasex | WT_veg | OK     | 43,9051  | 104,833 | 1,25564       | -2,26831      | 0,0233104  | 0,100009   | no  |
| smsA  | ChrIII_A_nidulans_FGSC_A4:640882-641856    | WT_5hasex | WT_veg | NOTEST | 0,394282 | 1,79919 | 2,19005       | -1,02229      | 0,306644   | 1          | no  |
| snaD  | ChrII_A_nidulans_FGSC_A4:1257913-1260422   | WT_5hasex | WT_veg | OK     | 16,5897  | 21,7526 | 0,3909        | -0,77305      | 0,439493   | 0,703774   | no  |
| snpA  | ChrIII_A_nidulans_FGSC_A4:2591235-2593456  | WT_5hasex | WT_veg | OK     | 163,369  | 374,905 | 1,19839       | -2,36286      | 0,0181344  | 0,0825825  | no  |
| sodA  | ChrVIII_A_nidulans_FGSC_A4:4171509-4172741 | WT_5hasex | WT_veg | OK     | 1312,59  | 2938,9  | 1,16286       | -2,02927      | 0,0424307  | 0,157479   | no  |
| sodB  | ChrV_A_nidulans_FGSC_A4:2351931-2352909    | WT_5hasex | WT_veg | OK     | 593,001  | 1564    | 1,39914       | -2,53587      | 0,0112169  | 0,0570167  | no  |
| sodM  | ChrVIII_A_nidulans_FGSC_A4:2476353-2477176 | WT_5hasex | WT_veg | NOTEST | 1,27773  | 1,70463 | 0,415872      | -0,328308     | 0,742679   | 1          | no  |
| sogA  | ChrII_A_nidulans_FGSC_A4:3663164-3665342   | WT_5hasex | WT_veg | OK     | 55,251   | 99,6664 | 0,851107      | -1,74801      | 0,0804627  | 0,248668   | no  |
| sogB  | ChrVII_A_nidulans_FGSC_A4:3248866-3250882  | WT_5hasex | WT_veg | OK     | 64,6242  | 67,6629 | 0,0662895     | -0,137406     | 0,89071    | 0,958576   | no  |
| sonA  | ChrVIII_A_nidulans_FGSC_A4:687494-688779   | WT_5hasex | WT_veg | OK     | 76,4329  | 134,017 | 0,810156      | -1,67294      | 0,0943394  | 0,277916   | no  |
| sonB  | ChrV_A_nidulans_FGSC_A4:2162144-2168709    | WT_5hasex | WT_veg | OK     | 38,1714  | 80,2744 | 1,07245       | -2,19202      | 0,0283779  | 0,116122   | no  |
| spaA  | ChrII_A_nidulans_FGSC_A4:2973333-2976173   | WT_5hasex | WT_veg | OK     | 11,9494  | 34,6521 | 1,536         | -2,93411      | 0,00334501 | 0,0214362  | yes |
| spb4  | ChrVI_A_nidulans_FGSC_A4:1579516-1581538   | WT_5hasex | WT_veg | OK     | 7,83936  | 50,6653 | 2,69219       | -4,58472      | 4,5459E-06 | 7,1003E-05 | yes |
| spdA  | ChrVIII_A_nidulans_FGSC_A4:2786504-2791251 | WT_5hasex | WT_veg | OK     | 217,041  | 471,62  | 1,11965       | -1,99484      | 0,04606    | 0,167509   | no  |
| spgA  | ChrIV_A_nidulans_FGSC_A4:686344-688637     | WT_5hasex | WT_veg | OK     | 87,0356  | 252,136 | 1,53452       | -3,19873      | 0,00138033 | 0,0102439  | yes |
| sreA  | ChrVIII_A_nidulans_FGSC_A4:4363947-4365712 | WT_5hasex | WT_veg | OK     | 21,9859  | 70,5572 | 1,68221       | -3,29461      | 0,0009856  | 0,00775487 | yes |



## Supplementary table 1

|          |                                            |           |        |        |          |          |               |               |            |            |     |
|----------|--------------------------------------------|-----------|--------|--------|----------|----------|---------------|---------------|------------|------------|-----|
| srgA     | ChrIV_A_nidulans_FGSC_A4:1433698-1434439   | WT_5hasex | WT_veg | OK     | 161,86   | 449,041  | 1,4721        | -3,00668      | 0,00264119 | 0,0175818  | yes |
| srgB     | ChrII_A_nidulans_FGSC_A4:1520315-1521948   | WT_5hasex | WT_veg | OK     | 708,269  | 1647,24  | 1,21768       | -2,18344      | 0,0290031  | 0,118145   | no  |
| srgC     | ChrIV_A_nidulans_FGSC_A4:2107086-2108129   | WT_5hasex | WT_veg | OK     | 104,543  | 120,029  | 0,199277      | -0,403864     | 0,686313   | 0,861994   | no  |
| srgD     | ChrV_A_nidulans_FGSC_A4:1176166-1177316    | WT_5hasex | WT_veg | OK     | 73,0963  | 117,425  | 0,683872      | -1,40714      | 0,159387   | 0,394474   | no  |
| srgE     | ChrVIII_A_nidulans_FGSC_A4:3837771-3839376 | WT_5hasex | WT_veg | OK     | 183,714  | 341,712  | 0,895321      | -1,79225      | 0,0730925  | 0,232429   | no  |
| srgG     | ChrIII_A_nidulans_FGSC_A4:564176-565653    | WT_5hasex | WT_veg | OK     | 167,1    | 344,107  | 1,04214       | -2,12191      | 0,0338452  | 0,13328    | no  |
| srgH     | ChrII_A_nidulans_FGSC_A4:2892108-2893714   | WT_5hasex | WT_veg | OK     | 150,927  | 364,115  | 1,27054       | -2,60843      | 0,00909582 | 0,048326   | yes |
| srgL     | ChrVIII_A_nidulans_FGSC_A4:4702501-4705778 | WT_5hasex | WT_veg | OK     | 29,9639  | 77,1733  | 1,36488       | -2,63937      | 0,00830603 | 0,0448992  | yes |
| srpA     | ChrII_A_nidulans_FGSC_A4:1263772-1265638   | WT_5hasex | WT_veg | OK     | 37,043   | 73,9282  | 0,996923      | -2,04258      | 0,0410943  | 0,153742   | no  |
| srrA     | ChrII_A_nidulans_FGSC_A4:3369724-3371705   | WT_5hasex | WT_veg | OK     | 32,6391  | 259,959  | 2,99361       | -5,85081      | 4,8918E-09 | 1,507E-07  | yes |
| srrB     | ChrIV_A_nidulans_FGSC_A4:1985803-1991991   | WT_5hasex | WT_veg | OK     | 14,9302  | 30,987   | 1,05343       | -2,12528      | 0,0335633  | 0,132359   | no  |
| srrC     | ChrII_A_nidulans_FGSC_A4:1985020-1985772   | WT_5hasex | WT_veg | OK     | 23,4602  | 72,7335  | 1,63241       | -2,66678      | 0,00765824 | 0,0420966  | yes |
| ssfA     | ChrVII_A_nidulans_FGSC_A4:1807654-1808961  | WT_5hasex | WT_veg | OK     | 208,182  | 262,231  | 0,332992      | -0,677082     | 0,498354   | 0,748574   | no  |
| sskA     | ChrIV_A_nidulans_FGSC_A4:2409046-2411657   | WT_5hasex | WT_veg | OK     | 30,9066  | 62,1264  | 1,00729       | -2,11478      | 0,0344484  | 0,135117   | no  |
| sskB     | ChrVIII_A_nidulans_FGSC_A4:1280136-1284404 | WT_5hasex | WT_veg | OK     | 15,5147  | 19,9925  | 0,365823      | -0,746652     | 0,455273   | 0,716563   | no  |
| ssnF     | ChrI_A_nidulans_FGSC_A4:930334-933704      | WT_5hasex | WT_veg | OK     | 46,9631  | 55,0308  | 0,228712      | -0,476699     | 0,633577   | 0,832482   | no  |
| ssoA     | ChrVI_A_nidulans_FGSC_A4:789469-791395     | WT_5hasex | WT_veg | OK     | 140,176  | 480,624  | 1,77767       | -3,58198      | 0,000341   | 0,00313931 | yes |
| stcA     | ChrIV_A_nidulans_FGSC_A4:2783097-2790165   | WT_5hasex | WT_veg | NOTEST | 0,418271 | 0,251943 | -0,731344     | 0,740438      | 0,459034   | 1          | no  |
| stcB     | ChrIV_A_nidulans_FGSC_A4:2780749-2782732   | WT_5hasex | WT_veg | NOTEST | 0,587111 | 2,46432  | 2,06948       | -2,04484      | 0,0408709  | 1          | no  |
| stcC     | ChrIV_A_nidulans_FGSC_A4:2779293-2780211   | WT_5hasex | WT_veg | NOTEST | 1,04541  | 0,192412 | -2,4418       | 0,808011      | 0,419084   | 1          | no  |
| stcE     | ChrIV_A_nidulans_FGSC_A4:2776348-2777470   | WT_5hasex | WT_veg | NOTEST | 0        | 1,77122  | 1.79769e+308  | 1.79769e+308  | 0,036343   | 1          | no  |
| stcF     | ChrIV_A_nidulans_FGSC_A4:2770496-2772142   | WT_5hasex | WT_veg | NOTEST | 0,684086 | 2,92964  | 2,09848       | -2,18384      | 0,0289739  | 1          | no  |
| stcI     | ChrIV_A_nidulans_FGSC_A4:2767430-2768638   | WT_5hasex | WT_veg | OK     | 5,90945  | 11,8009  | 0,997797      | -1,47286      | 0,140789   | 0,363789   | no  |
| stcJ     | ChrIV_A_nidulans_FGSC_A4:2761767-2766495   | WT_5hasex | WT_veg | OK     | 4,13231  | 3,07994  | -0,424049     | 0,730417      | 0,465136   | 0,724125   | no  |
| stcK     | ChrIV_A_nidulans_FGSC_A4:2755287-2761273   | WT_5hasex | WT_veg | NOTEST | 1,8944   | 2,15468  | 0,185732      | -0,287494     | 0,773734   | 1          | no  |
| stcL     | ChrIV_A_nidulans_FGSC_A4:2753657-2755283   | WT_5hasex | WT_veg | NOTEST | 0,936551 | 0        | -1.79769e+308 | -1.79769e+308 | 0,0315813  | 1          | no  |
| stcN     | ChrIV_A_nidulans_FGSC_A4:2750716-2752732   | WT_5hasex | WT_veg | NOTEST | 0        | 0        | 0             | 0             | 1          | 1          | no  |
| stcO     | ChrIV_A_nidulans_FGSC_A4:2749783-2750682   | WT_5hasex | WT_veg | NOTEST | 0        | 0        | 0             | 0             | 1          | 1          | no  |
| stcQ     | ChrIV_A_nidulans_FGSC_A4:2747368-2748271   | WT_5hasex | WT_veg | NOTEST | 0        | 0        | 0             | 0             | 1          | 1          | no  |
| stcS     | ChrIV_A_nidulans_FGSC_A4:2743867-2745424   | WT_5hasex | WT_veg | NOTEST | 0        | 0        | 0             | 0             | 1          | 1          | no  |
| stcT     | ChrIV_A_nidulans_FGSC_A4:2742344-2743058   | WT_5hasex | WT_veg | NOTEST | 0        | 0        | 0             | 0             | 1          | 1          | no  |
| stcU     | ChrIV_A_nidulans_FGSC_A4:2741251-2742146   | WT_5hasex | WT_veg | NOTEST | 0,79421  | 0        | -1.79769e+308 | -1.79769e+308 | 0,0653486  | 1          | no  |
| stcV     | ChrIV_A_nidulans_FGSC_A4:2739866-2741137   | WT_5hasex | WT_veg | OK     | 2,53725  | 1,37822  | -0,880453     | 0,837387      | 0,402375   | 0,673773   | no  |
| stcW     | ChrIV_A_nidulans_FGSC_A4:2737332-2739681   | WT_5hasex | WT_veg | NOTEST | 0,243359 | 1,16778  | 2,26261       | -1,93913      | 0,052486   | 1          | no  |
| ste13    | ChrVI_A_nidulans_FGSC_A4:2296436-2301857   | WT_5hasex | WT_veg | OK     | 36,6128  | 58,0466  | 0,664864      | -1,32525      | 0,185088   | 0,433745   | no  |
| steA     | ChrVII_A_nidulans_FGSC_A4:3455979-3459699  | WT_5hasex | WT_veg | OK     | 70,398   | 127,822  | 0,860532      | -1,54922      | 0,121328   | 0,330157   | no  |
| steC     | ChrVII_A_nidulans_FGSC_A4:3391706-3394520  | WT_5hasex | WT_veg | OK     | 33,0397  | 50,4384  | 0,610319      | -1,26086      | 0,20736    | 0,464522   | no  |
| strA     | ChrII_A_nidulans_FGSC_A4:657881-660900     | WT_5hasex | WT_veg | OK     | 45,0788  | 52,3183  | 0,214867      | -0,443893     | 0,65712    | 0,84547    | no  |
| stuA     | ChrI_A_nidulans_FGSC_A4:2087126-2089502    | WT_5hasex | WT_veg | OK     | 157,753  | 190,51   | 0,272206      | -0,469151     | 0,638962   | 0,835318   | no  |
| suAprgA1 | ChrVI_A_nidulans_FGSC_A4:2050946-2052407   | WT_5hasex | WT_veg | OK     | 353,668  | 610,647  | 0,787946      | -1,5119       | 0,130559   | 0,346197   | no  |
| sudA     | ChrI_A_nidulans_FGSC_A4:404623-409531      | WT_5hasex | WT_veg | OK     | 31,1334  | 42,6136  | 0,452848      | -0,915477     | 0,359942   | 0,63457    | no  |
| sudD     | ChrI_A_nidulans_FGSC_A4:409729-411698      | WT_5hasex | WT_veg | OK     | 14,8794  | 24,9224  | 0,744128      | -1,40174      | 0,160993   | 0,396594   | no  |
| sumO     | ChrVIII_A_nidulans_FGSC_A4:1237842-1238535 | WT_5hasex | WT_veg | OK     | 153,816  | 340,074  | 1,14464       | -2,36716      | 0,0179254  | 0,0819441  | no  |
| sunA     | ChrI_A_nidulans_FGSC_A4:2883259-2885322    | WT_5hasex | WT_veg | OK     | 551,343  | 793,662  | 0,525573      | -0,920291     | 0,35742    | 0,632632   | no  |
| sunB     | ChrVIII_A_nidulans_FGSC_A4:2665078-2666750 | WT_5hasex | WT_veg | OK     | 151,825  | 240,092  | 0,661176      | -1,34682      | 0,178038   | 0,423161   | no  |
| surG     | ChrIII_A_nidulans_FGSC_A4:1519351-1520890  | WT_5hasex | WT_veg | OK     | 443,451  | 2206,24  | 2,31474       | -4,17299      | 3,0062E-05 | 0,00038444 | yes |
| swoC     | ChrIII_A_nidulans_FGSC_A4:2598103-2600165  | WT_5hasex | WT_veg | OK     | 176,049  | 868,907  | 2,30323       | -4,25834      | 2,0595E-05 | 0,00027357 | yes |
| swoF     | ChrII_A_nidulans_FGSC_A4:2899123-2900843   | WT_5hasex | WT_veg | OK     | 83,7351  | 202,245  | 1,2722        | -2,64088      | 0,00826909 | 0,044778   | yes |
| swoH     | ChrII_A_nidulans_FGSC_A4:1171261-1172244   | WT_5hasex | WT_veg | OK     | 1315,43  | 1776,69  | 0,433664      | -0,787831     | 0,430796   | 0,697327   | no  |
| swoK     | ChrI_A_nidulans_FGSC_A4:2199895-2200972    | WT_5hasex | WT_veg | OK     | 157,138  | 331,056  | 1,07504       | -2,23483      | 0,0254286  | 0,10684    | no  |
| swoM     | ChrI_A_nidulans_FGSC_A4:1440748-1442761    | WT_5hasex | WT_veg | OK     | 274,895  | 762,563  | 1,47198       | -2,69494      | 0,0070401  | 0,0392965  | yes |
| synA     | ChrIII_A_nidulans_FGSC_A4:2877170-2878367  | WT_5hasex | WT_veg | OK     | 422,792  | 718,642  | 0,765323      | -1,49461      | 0,135016   | 0,354075   | no  |
| tA(AGC)1 | ChrVII_A_nidulans_FGSC_A4:281283-281355    | WT_5hasex | WT_veg | NOTEST | 0        | 0        | 0             | 0             | 1          | 1          | no  |

## Supplementary table 1

|           |                                            |           |        |        |   |   |   |   |   |      |
|-----------|--------------------------------------------|-----------|--------|--------|---|---|---|---|---|------|
| tA(AGC)2  | ChrVII_A_nidulans_FGSC_A4:281118-281190    | WT_5hasex | WT_veg | NOTEST | 0 | 0 | 0 | 0 | 1 | 1 no |
| tA(AGC)3  | ChrVIII_A_nidulans_FGSC_A4:2085753-2085825 | WT_5hasex | WT_veg | NOTEST | 0 | 0 | 0 | 0 | 1 | 1 no |
| tA(AGC)4  | ChrVIII_A_nidulans_FGSC_A4:2090570-2090642 | WT_5hasex | WT_veg | NOTEST | 0 | 0 | 0 | 0 | 1 | 1 no |
| tA(AGC)5  | ChrVIII_A_nidulans_FGSC_A4:2089410-2089482 | WT_5hasex | WT_veg | NOTEST | 0 | 0 | 0 | 0 | 1 | 1 no |
| tA(AGC)6  | ChrVIII_A_nidulans_FGSC_A4:2089226-2089298 | WT_5hasex | WT_veg | NOTEST | 0 | 0 | 0 | 0 | 1 | 1 no |
| tA(AGC)7  | ChrVIII_A_nidulans_FGSC_A4:2088987-2089059 | WT_5hasex | WT_veg | NOTEST | 0 | 0 | 0 | 0 | 1 | 1 no |
| tA(AGC)8  | ChrVIII_A_nidulans_FGSC_A4:2087203-2087275 | WT_5hasex | WT_veg | NOTEST | 0 | 0 | 0 | 0 | 1 | 1 no |
| tA(CGC)1  | ChrI_A_nidulans_FGSC_A4:2013455-2013527    | WT_5hasex | WT_veg | NOTEST | 0 | 0 | 0 | 0 | 1 | 1 no |
| tA(CGC)2  | ChrVII_A_nidulans_FGSC_A4:2281410-2281482  | WT_5hasex | WT_veg | NOTEST | 0 | 0 | 0 | 0 | 1 | 1 no |
| tA(CGC)3  | ChrVIII_A_nidulans_FGSC_A4:1102888-1102960 | WT_5hasex | WT_veg | NOTEST | 0 | 0 | 0 | 0 | 1 | 1 no |
| tA(TGC)1  | ChrVIII_A_nidulans_FGSC_A4:1103355-1103427 | WT_5hasex | WT_veg | NOTEST | 0 | 0 | 0 | 0 | 1 | 1 no |
| tA(TGC)2  | ChrVIII_A_nidulans_FGSC_A4:3114184-3119333 | WT_5hasex | WT_veg | NOTEST | 0 | 0 | 0 | 0 | 1 | 1 no |
| tC(GCA)1  | ChrV_A_nidulans_FGSC_A4:431083-431166      | WT_5hasex | WT_veg | NOTEST | 0 | 0 | 0 | 0 | 1 | 1 no |
| tC(GCA)2  | ChrV_A_nidulans_FGSC_A4:1216256-1216339    | WT_5hasex | WT_veg | NOTEST | 0 | 0 | 0 | 0 | 1 | 1 no |
| tC(GCA)3  | ChrV_A_nidulans_FGSC_A4:1198141-1198224    | WT_5hasex | WT_veg | NOTEST | 0 | 0 | 0 | 0 | 1 | 1 no |
| tD(GTC)1  | ChrII_A_nidulans_FGSC_A4:990174-990261     | WT_5hasex | WT_veg | NOTEST | 0 | 0 | 0 | 0 | 1 | 1 no |
| tD(GTC)2  | ChrIV_A_nidulans_FGSC_A4:1013958-1014046   | WT_5hasex | WT_veg | NOTEST | 0 | 0 | 0 | 0 | 1 | 1 no |
| tD(GTC)3  | ChrV_A_nidulans_FGSC_A4:2389192-2389280    | WT_5hasex | WT_veg | NOTEST | 0 | 0 | 0 | 0 | 1 | 1 no |
| tD(GTC)4  | ChrV_A_nidulans_FGSC_A4:2395290-2395378    | WT_5hasex | WT_veg | NOTEST | 0 | 0 | 0 | 0 | 1 | 1 no |
| tD(GTC)5  | ChrV_A_nidulans_FGSC_A4:2392642-2392729    | WT_5hasex | WT_veg | NOTEST | 0 | 0 | 0 | 0 | 1 | 1 no |
| tD(GTC)6  | ChrVII_A_nidulans_FGSC_A4:2021788-2021875  | WT_5hasex | WT_veg | NOTEST | 0 | 0 | 0 | 0 | 1 | 1 no |
| tD(GTC)7  | ChrVII_A_nidulans_FGSC_A4:1549119-1549206  | WT_5hasex | WT_veg | NOTEST | 0 | 0 | 0 | 0 | 1 | 1 no |
| tD(GTC)8  | ChrVIII_A_nidulans_FGSC_A4:275470-275557   | WT_5hasex | WT_veg | NOTEST | 0 | 0 | 0 | 0 | 1 | 1 no |
| tE(CTC)1  | ChrI_A_nidulans_FGSC_A4:867268-867340      | WT_5hasex | WT_veg | NOTEST | 0 | 0 | 0 | 0 | 1 | 1 no |
| tE(CTC)2  | ChrI_A_nidulans_FGSC_A4:874257-874329      | WT_5hasex | WT_veg | NOTEST | 0 | 0 | 0 | 0 | 1 | 1 no |
| tE(CTC)3  | ChrI_A_nidulans_FGSC_A4:870520-870592      | WT_5hasex | WT_veg | NOTEST | 0 | 0 | 0 | 0 | 1 | 1 no |
| tE(CTC)4  | ChrIII_A_nidulans_FGSC_A4:2838586-2838667  | WT_5hasex | WT_veg | NOTEST | 0 | 0 | 0 | 0 | 1 | 1 no |
| tE(CTC)5  | ChrIII_A_nidulans_FGSC_A4:302798-302870    | WT_5hasex | WT_veg | NOTEST | 0 | 0 | 0 | 0 | 1 | 1 no |
| tE(CTC)6  | ChrIV_A_nidulans_FGSC_A4:1806384-1806456   | WT_5hasex | WT_veg | NOTEST | 0 | 0 | 0 | 0 | 1 | 1 no |
| tE(CTC)7  | ChrVII_A_nidulans_FGSC_A4:347775-347847    | WT_5hasex | WT_veg | NOTEST | 0 | 0 | 0 | 0 | 1 | 1 no |
| tE(CTC)8  | ChrVIII_A_nidulans_FGSC_A4:200108-200180   | WT_5hasex | WT_veg | NOTEST | 0 | 0 | 0 | 0 | 1 | 1 no |
| tE(TTC)1  | ChrII_A_nidulans_FGSC_A4:711174-711267     | WT_5hasex | WT_veg | NOTEST | 0 | 0 | 0 | 0 | 1 | 1 no |
| tE(TTC)2  | ChrVI_A_nidulans_FGSC_A4:1546830-1546902   | WT_5hasex | WT_veg | NOTEST | 0 | 0 | 0 | 0 | 1 | 1 no |
| tE(TTC)3  | ChrVI_A_nidulans_FGSC_A4:1695964-1696432   | WT_5hasex | WT_veg | NOTEST | 0 | 0 | 0 | 0 | 1 | 1 no |
| tF(GAA)1  | ChrII_A_nidulans_FGSC_A4:3183970-3184074   | WT_5hasex | WT_veg | NOTEST | 0 | 0 | 0 | 0 | 1 | 1 no |
| tF(GAA)2  | ChrII_A_nidulans_FGSC_A4:3197901-3198005   | WT_5hasex | WT_veg | NOTEST | 0 | 0 | 0 | 0 | 1 | 1 no |
| tF(GAA)3  | ChrIII_A_nidulans_FGSC_A4:1985896-1986000  | WT_5hasex | WT_veg | NOTEST | 0 | 0 | 0 | 0 | 1 | 1 no |
| tF(GAA)4  | ChrV_A_nidulans_FGSC_A4:1615005-1615108    | WT_5hasex | WT_veg | NOTEST | 0 | 0 | 0 | 0 | 1 | 1 no |
| tF(GAA)5  | ChrVI_A_nidulans_FGSC_A4:2923424-2923527   | WT_5hasex | WT_veg | NOTEST | 0 | 0 | 0 | 0 | 1 | 1 no |
| tG(CCC)1  | ChrVII_A_nidulans_FGSC_A4:1550026-1550114  | WT_5hasex | WT_veg | NOTEST | 0 | 0 | 0 | 0 | 1 | 1 no |
| tG(GCC)1  | ChrII_A_nidulans_FGSC_A4:271108-271179     | WT_5hasex | WT_veg | NOTEST | 0 | 0 | 0 | 0 | 1 | 1 no |
| tG(GCC)10 | ChrVII_A_nidulans_FGSC_A4:1350240-1350311  | WT_5hasex | WT_veg | NOTEST | 0 | 0 | 0 | 0 | 1 | 1 no |
| tG(GCC)11 | ChrVIII_A_nidulans_FGSC_A4:4586752-4586823 | WT_5hasex | WT_veg | NOTEST | 0 | 0 | 0 | 0 | 1 | 1 no |
| tG(GCC)2  | ChrII_A_nidulans_FGSC_A4:2096283-2096354   | WT_5hasex | WT_veg | NOTEST | 0 | 0 | 0 | 0 | 1 | 1 no |
| tG(GCC)3  | ChrIII_A_nidulans_FGSC_A4:1646583-1646654  | WT_5hasex | WT_veg | NOTEST | 0 | 0 | 0 | 0 | 1 | 1 no |
| tG(GCC)4  | ChrV_A_nidulans_FGSC_A4:441426-441497      | WT_5hasex | WT_veg | NOTEST | 0 | 0 | 0 | 0 | 1 | 1 no |
| tG(GCC)5  | ChrV_A_nidulans_FGSC_A4:753212-753283      | WT_5hasex | WT_veg | NOTEST | 0 | 0 | 0 | 0 | 1 | 1 no |
| tG(GCC)6  | ChrV_A_nidulans_FGSC_A4:1331978-1332049    | WT_5hasex | WT_veg | NOTEST | 0 | 0 | 0 | 0 | 1 | 1 no |
| tG(GCC)7  | ChrV_A_nidulans_FGSC_A4:2900020-2900091    | WT_5hasex | WT_veg | NOTEST | 0 | 0 | 0 | 0 | 1 | 1 no |
| tG(GCC)8  | ChrVI_A_nidulans_FGSC_A4:1153595-1153666   | WT_5hasex | WT_veg | NOTEST | 0 | 0 | 0 | 0 | 1 | 1 no |
| tG(GCC)9  | ChrVI_A_nidulans_FGSC_A4:1616424-1616495   | WT_5hasex | WT_veg | NOTEST | 0 | 0 | 0 | 0 | 1 | 1 no |
| tG(TCC)1  | ChrII_A_nidulans_FGSC_A4:476998-477086     | WT_5hasex | WT_veg | NOTEST | 0 | 0 | 0 | 0 | 1 | 1 no |
| tG(TCC)2  | ChrVI_A_nidulans_FGSC_A4:2373948-2374036   | WT_5hasex | WT_veg | NOTEST | 0 | 0 | 0 | 0 | 1 | 1 no |

## Supplementary table 1

|          |                                            |           |        |        |   |   |   |   |   |      |
|----------|--------------------------------------------|-----------|--------|--------|---|---|---|---|---|------|
| tG(TCC)3 | ChrVI_A_nidulans_FGSC_A4:2400119-2400190   | WT_5hasex | WT_veg | NOTEST | 0 | 0 | 0 | 0 | 1 | 1 no |
| tH(GTG)1 | ChrVII_A_nidulans_FGSC_A4:2306452-2306524  | WT_5hasex | WT_veg | NOTEST | 0 | 0 | 0 | 0 | 1 | 1 no |
| tH(GTG)2 | ChrVIII_A_nidulans_FGSC_A4:4025652-4025723 | WT_5hasex | WT_veg | NOTEST | 0 | 0 | 0 | 0 | 1 | 1 no |
| tH(GTG)3 | ChrVIII_A_nidulans_FGSC_A4:4034059-4034130 | WT_5hasex | WT_veg | NOTEST | 0 | 0 | 0 | 0 | 1 | 1 no |
| tH(GTG)4 | ChrVIII_A_nidulans_FGSC_A4:4032791-4032862 | WT_5hasex | WT_veg | NOTEST | 0 | 0 | 0 | 0 | 1 | 1 no |
| tH(GTG)5 | ChrVIII_A_nidulans_FGSC_A4:4028296-4028367 | WT_5hasex | WT_veg | NOTEST | 0 | 0 | 0 | 0 | 1 | 1 no |
| tI(AAT)1 | ChrV_A_nidulans_FGSC_A4:1927701-1927783    | WT_5hasex | WT_veg | NOTEST | 0 | 0 | 0 | 0 | 1 | 1 no |
| tI(AAT)2 | ChrV_A_nidulans_FGSC_A4:2078761-2078857    | WT_5hasex | WT_veg | NOTEST | 0 | 0 | 0 | 0 | 1 | 1 no |
| tI(AAT)3 | ChrV_A_nidulans_FGSC_A4:2081458-2081554    | WT_5hasex | WT_veg | NOTEST | 0 | 0 | 0 | 0 | 1 | 1 no |
| tI(AAT)4 | ChrV_A_nidulans_FGSC_A4:2077736-2077818    | WT_5hasex | WT_veg | NOTEST | 0 | 0 | 0 | 0 | 1 | 1 no |
| tI(AAT)5 | ChrVII_A_nidulans_FGSC_A4:4069929-4070003  | WT_5hasex | WT_veg | NOTEST | 0 | 0 | 0 | 0 | 1 | 1 no |
| tI(AAT)6 | ChrVII_A_nidulans_FGSC_A4:4086305-4086379  | WT_5hasex | WT_veg | NOTEST | 0 | 0 | 0 | 0 | 1 | 1 no |
| tI(AAT)7 | ChrVII_A_nidulans_FGSC_A4:2183314-2183388  | WT_5hasex | WT_veg | NOTEST | 0 | 0 | 0 | 0 | 1 | 1 no |
| tI(TAT)1 | ChrVIII_A_nidulans_FGSC_A4:1682547-1682638 | WT_5hasex | WT_veg | NOTEST | 0 | 0 | 0 | 0 | 1 | 1 no |
| tK(CTT)1 | ChrI_A_nidulans_FGSC_A4:2701253-2701326    | WT_5hasex | WT_veg | NOTEST | 0 | 0 | 0 | 0 | 1 | 1 no |
| tK(CTT)2 | ChrIV_A_nidulans_FGSC_A4:2094553-2094626   | WT_5hasex | WT_veg | NOTEST | 0 | 0 | 0 | 0 | 1 | 1 no |
| tK(CTT)3 | ChrIV_A_nidulans_FGSC_A4:1848730-1848803   | WT_5hasex | WT_veg | NOTEST | 0 | 0 | 0 | 0 | 1 | 1 no |
| tK(CTT)4 | ChrVI_A_nidulans_FGSC_A4:1687277-1687350   | WT_5hasex | WT_veg | NOTEST | 0 | 0 | 0 | 0 | 1 | 1 no |
| tK(CTT)5 | ChrVII_A_nidulans_FGSC_A4:877744-877817    | WT_5hasex | WT_veg | NOTEST | 0 | 0 | 0 | 0 | 1 | 1 no |
| tK(CTT)6 | ChrVII_A_nidulans_FGSC_A4:458904-458977    | WT_5hasex | WT_veg | NOTEST | 0 | 0 | 0 | 0 | 1 | 1 no |
| tK(CTT)7 | ChrVII_A_nidulans_FGSC_A4:359349-359422    | WT_5hasex | WT_veg | NOTEST | 0 | 0 | 0 | 0 | 1 | 1 no |
| tK(CTT)8 | ChrVIII_A_nidulans_FGSC_A4:510133-510206   | WT_5hasex | WT_veg | NOTEST | 0 | 0 | 0 | 0 | 1 | 1 no |
| tK(TTT)1 | ChrII_A_nidulans_FGSC_A4:3955775-3955867   | WT_5hasex | WT_veg | NOTEST | 0 | 0 | 0 | 0 | 1 | 1 no |
| tK(TTT)2 | ChrII_A_nidulans_FGSC_A4:3954770-3954863   | WT_5hasex | WT_veg | NOTEST | 0 | 0 | 0 | 0 | 1 | 1 no |
| tL(AAG)1 | ChrV_A_nidulans_FGSC_A4:924120-924235      | WT_5hasex | WT_veg | NOTEST | 0 | 0 | 0 | 0 | 1 | 1 no |
| tL(AAG)2 | ChrV_A_nidulans_FGSC_A4:1597432-1597548    | WT_5hasex | WT_veg | NOTEST | 0 | 0 | 0 | 0 | 1 | 1 no |
| tL(AAG)3 | ChrV_A_nidulans_FGSC_A4:2637218-2637336    | WT_5hasex | WT_veg | NOTEST | 0 | 0 | 0 | 0 | 1 | 1 no |
| tL(AAG)4 | ChrV_A_nidulans_FGSC_A4:440316-440434      | WT_5hasex | WT_veg | NOTEST | 0 | 0 | 0 | 0 | 1 | 1 no |
| tL(AAG)5 | ChrVII_A_nidulans_FGSC_A4:2177981-2178098  | WT_5hasex | WT_veg | NOTEST | 0 | 0 | 0 | 0 | 1 | 1 no |
| tL(AAG)6 | ChrVII_A_nidulans_FGSC_A4:356067-356185    | WT_5hasex | WT_veg | NOTEST | 0 | 0 | 0 | 0 | 1 | 1 no |
| tL(CAA)1 | ChrI_A_nidulans_FGSC_A4:3463042-3463151    | WT_5hasex | WT_veg | NOTEST | 0 | 0 | 0 | 0 | 1 | 1 no |
| tL(CAA)2 | ChrVII_A_nidulans_FGSC_A4:3352747-3352858  | WT_5hasex | WT_veg | NOTEST | 0 | 0 | 0 | 0 | 1 | 1 no |
| tL(CAG)1 | ChrIV_A_nidulans_FGSC_A4:1888366-1888473   | WT_5hasex | WT_veg | NOTEST | 0 | 0 | 0 | 0 | 1 | 1 no |
| tL(CAG)2 | ChrIV_A_nidulans_FGSC_A4:1888569-1888684   | WT_5hasex | WT_veg | NOTEST | 0 | 0 | 0 | 0 | 1 | 1 no |
| tL(CAG)3 | ChrVIII_A_nidulans_FGSC_A4:3869967-3870074 | WT_5hasex | WT_veg | NOTEST | 0 | 0 | 0 | 0 | 1 | 1 no |
| tL(TAA)1 | ChrII_A_nidulans_FGSC_A4:3223765-3223866   | WT_5hasex | WT_veg | NOTEST | 0 | 0 | 0 | 0 | 1 | 1 no |
| tL(TAG)1 | ChrI_A_nidulans_FGSC_A4:3365749-3365846    | WT_5hasex | WT_veg | NOTEST | 0 | 0 | 0 | 0 | 1 | 1 no |
| tL(TAG)2 | ChrVIII_A_nidulans_FGSC_A4:1611162-1611258 | WT_5hasex | WT_veg | NOTEST | 0 | 0 | 0 | 0 | 1 | 1 no |
| tM(CAT)1 | ChrII_A_nidulans_FGSC_A4:766137-766209     | WT_5hasex | WT_veg | NOTEST | 0 | 0 | 0 | 0 | 1 | 1 no |
| tM(CAT)2 | ChrII_A_nidulans_FGSC_A4:3111725-3111832   | WT_5hasex | WT_veg | NOTEST | 0 | 0 | 0 | 0 | 1 | 1 no |
| tM(CAT)3 | ChrII_A_nidulans_FGSC_A4:3131644-3131751   | WT_5hasex | WT_veg | NOTEST | 0 | 0 | 0 | 0 | 1 | 1 no |
| tM(CAT)4 | ChrIII_A_nidulans_FGSC_A4:1446822-1446894  | WT_5hasex | WT_veg | NOTEST | 0 | 0 | 0 | 0 | 1 | 1 no |
| tM(CAT)5 | ChrVI_A_nidulans_FGSC_A4:2800702-2800809   | WT_5hasex | WT_veg | NOTEST | 0 | 0 | 0 | 0 | 1 | 1 no |
| tM(CAT)6 | ChrVII_A_nidulans_FGSC_A4:3523108-3523180  | WT_5hasex | WT_veg | NOTEST | 0 | 0 | 0 | 0 | 1 | 1 no |
| tM(CAT)7 | ChrVII_A_nidulans_FGSC_A4:3543039-3543111  | WT_5hasex | WT_veg | NOTEST | 0 | 0 | 0 | 0 | 1 | 1 no |
| tN(GTT)1 | ChrI_A_nidulans_FGSC_A4:734147-734237      | WT_5hasex | WT_veg | NOTEST | 0 | 0 | 0 | 0 | 1 | 1 no |
| tN(GTT)2 | ChrI_A_nidulans_FGSC_A4:736432-736522      | WT_5hasex | WT_veg | NOTEST | 0 | 0 | 0 | 0 | 1 | 1 no |
| tN(GTT)3 | ChrI_A_nidulans_FGSC_A4:736835-736925      | WT_5hasex | WT_veg | NOTEST | 0 | 0 | 0 | 0 | 1 | 1 no |
| tN(GTT)4 | ChrII_A_nidulans_FGSC_A4:3191945-3192032   | WT_5hasex | WT_veg | NOTEST | 0 | 0 | 0 | 0 | 1 | 1 no |
| tN(GTT)5 | ChrVII_A_nidulans_FGSC_A4:856726-856838    | WT_5hasex | WT_veg | NOTEST | 0 | 0 | 0 | 0 | 1 | 1 no |
| tN(GTT)6 | ChrVII_A_nidulans_FGSC_A4:856359-856452    | WT_5hasex | WT_veg | NOTEST | 0 | 0 | 0 | 0 | 1 | 1 no |
| tP(AGG)1 | ChrII_A_nidulans_FGSC_A4:2050427-2050519   | WT_5hasex | WT_veg | NOTEST | 0 | 0 | 0 | 0 | 1 | 1 no |
| tP(AGG)2 | ChrII_A_nidulans_FGSC_A4:2047472-2047564   | WT_5hasex | WT_veg | NOTEST | 0 | 0 | 0 | 0 | 1 | 1 no |

## Supplementary table 1

|          |                                            |           |        |        |   |   |   |   |   |      |
|----------|--------------------------------------------|-----------|--------|--------|---|---|---|---|---|------|
| tP(AGG)3 | ChrVIII_A_nidulans_FGSC_A4:385989-386080   | WT_5hasex | WT_veg | NOTEST | 0 | 0 | 0 | 0 | 1 | 1 no |
| tP(AGG)4 | ChrVIII_A_nidulans_FGSC_A4:2625841-2625931 | WT_5hasex | WT_veg | NOTEST | 0 | 0 | 0 | 0 | 1 | 1 no |
| tP(AGG)5 | ChrVIII_A_nidulans_FGSC_A4:2625436-2625526 | WT_5hasex | WT_veg | NOTEST | 0 | 0 | 0 | 0 | 1 | 1 no |
| tP(AGG)6 | ChrVIII_A_nidulans_FGSC_A4:2547564-2547656 | WT_5hasex | WT_veg | NOTEST | 0 | 0 | 0 | 0 | 1 | 1 no |
| tP(CGG)1 | ChrV_A_nidulans_FGSC_A4:323229-323301      | WT_5hasex | WT_veg | NOTEST | 0 | 0 | 0 | 0 | 1 | 1 no |
| tP(CGG)2 | ChrVIII_A_nidulans_FGSC_A4:4820469-4820576 | WT_5hasex | WT_veg | NOTEST | 0 | 0 | 0 | 0 | 1 | 1 no |
| tP(TGG)1 | ChrVIII_A_nidulans_FGSC_A4:4818276-4818363 | WT_5hasex | WT_veg | NOTEST | 0 | 0 | 0 | 0 | 1 | 1 no |
| tP(TGG)2 | ChrVIII_A_nidulans_FGSC_A4:4816400-4816487 | WT_5hasex | WT_veg | NOTEST | 0 | 0 | 0 | 0 | 1 | 1 no |
| tQ(CTG)1 | ChrIII_A_nidulans_FGSC_A4:2827560-2827646  | WT_5hasex | WT_veg | NOTEST | 0 | 0 | 0 | 0 | 1 | 1 no |
| tQ(CTG)2 | ChrVII_A_nidulans_FGSC_A4:160621-160709    | WT_5hasex | WT_veg | NOTEST | 0 | 0 | 0 | 0 | 1 | 1 no |
| tQ(CTG)3 | ChrVIII_A_nidulans_FGSC_A4:4801808-4803666 | WT_5hasex | WT_veg | NOTEST | 0 | 0 | 0 | 0 | 1 | 1 no |
| tQ(CTG)4 | ChrVIII_A_nidulans_FGSC_A4:4801808-4803666 | WT_5hasex | WT_veg | NOTEST | 0 | 0 | 0 | 0 | 1 | 1 no |
| tQ(CTG)5 | ChrVIII_A_nidulans_FGSC_A4:4804907-4804995 | WT_5hasex | WT_veg | NOTEST | 0 | 0 | 0 | 0 | 1 | 1 no |
| tQ(TTG)1 | ChrVIII_A_nidulans_FGSC_A4:1880841-1880925 | WT_5hasex | WT_veg | NOTEST | 0 | 0 | 0 | 0 | 1 | 1 no |
| tQ(TTG)2 | ChrVIII_A_nidulans_FGSC_A4:1880570-1880657 | WT_5hasex | WT_veg | NOTEST | 0 | 0 | 0 | 0 | 1 | 1 no |
| tR(ACG)1 | ChrI_A_nidulans_FGSC_A4:2756246-2756318    | WT_5hasex | WT_veg | NOTEST | 0 | 0 | 0 | 0 | 1 | 1 no |
| tR(ACG)2 | ChrI_A_nidulans_FGSC_A4:3130846-3130919    | WT_5hasex | WT_veg | NOTEST | 0 | 0 | 0 | 0 | 1 | 1 no |
| tR(ACG)3 | ChrI_A_nidulans_FGSC_A4:2573101-2573174    | WT_5hasex | WT_veg | NOTEST | 0 | 0 | 0 | 0 | 1 | 1 no |
| tR(ACG)4 | ChrII_A_nidulans_FGSC_A4:2102510-2102583   | WT_5hasex | WT_veg | NOTEST | 0 | 0 | 0 | 0 | 1 | 1 no |
| tR(ACG)5 | ChrII_A_nidulans_FGSC_A4:1320845-1320918   | WT_5hasex | WT_veg | NOTEST | 0 | 0 | 0 | 0 | 1 | 1 no |
| tR(ACG)6 | ChrIII_A_nidulans_FGSC_A4:3260699-3260772  | WT_5hasex | WT_veg | NOTEST | 0 | 0 | 0 | 0 | 1 | 1 no |
| tR(ACG)7 | ChrIV_A_nidulans_FGSC_A4:837688-837761     | WT_5hasex | WT_veg | NOTEST | 0 | 0 | 0 | 0 | 1 | 1 no |
| tR(ACG)8 | ChrVI_A_nidulans_FGSC_A4:2614092-2614165   | WT_5hasex | WT_veg | NOTEST | 0 | 0 | 0 | 0 | 1 | 1 no |
| tR(ACG)9 | ChrVI_A_nidulans_FGSC_A4:1623872-1623945   | WT_5hasex | WT_veg | NOTEST | 0 | 0 | 0 | 0 | 1 | 1 no |
| tR(CCG)1 | ChrI_A_nidulans_FGSC_A4:2754936-2755029    | WT_5hasex | WT_veg | NOTEST | 0 | 0 | 0 | 0 | 1 | 1 no |
| tR(CCG)2 | ChrV_A_nidulans_FGSC_A4:2873584-2873665    | WT_5hasex | WT_veg | NOTEST | 0 | 0 | 0 | 0 | 1 | 1 no |
| tR(CCT)1 | ChrV_A_nidulans_FGSC_A4:2477574-2477696    | WT_5hasex | WT_veg | NOTEST | 0 | 0 | 0 | 0 | 1 | 1 no |
| tR(CCT)2 | ChrV_A_nidulans_FGSC_A4:2478756-2478852    | WT_5hasex | WT_veg | NOTEST | 0 | 0 | 0 | 0 | 1 | 1 no |
| tR(TCG)1 | ChrVII_A_nidulans_FGSC_A4:2252845-2252928  | WT_5hasex | WT_veg | NOTEST | 0 | 0 | 0 | 0 | 1 | 1 no |
| tR(TCG)2 | ChrVII_A_nidulans_FGSC_A4:2253447-2253530  | WT_5hasex | WT_veg | NOTEST | 0 | 0 | 0 | 0 | 1 | 1 no |
| tR(TCT)1 | ChrVII_A_nidulans_FGSC_A4:2776385-2776457  | WT_5hasex | WT_veg | NOTEST | 0 | 0 | 0 | 0 | 1 | 1 no |
| tR(TCT)2 | ChrVII_A_nidulans_FGSC_A4:2776230-2776302  | WT_5hasex | WT_veg | NOTEST | 0 | 0 | 0 | 0 | 1 | 1 no |
| tS(AGA)1 | ChrIV_A_nidulans_FGSC_A4:2092831-2092912   | WT_5hasex | WT_veg | NOTEST | 0 | 0 | 0 | 0 | 1 | 1 no |
| tS(AGA)2 | ChrV_A_nidulans_FGSC_A4:1586178-1586259    | WT_5hasex | WT_veg | NOTEST | 0 | 0 | 0 | 0 | 1 | 1 no |
| tS(AGA)3 | ChrVII_A_nidulans_FGSC_A4:4242090-4242171  | WT_5hasex | WT_veg | NOTEST | 0 | 0 | 0 | 0 | 1 | 1 no |
| tS(AGA)4 | ChrVII_A_nidulans_FGSC_A4:4247219-4247300  | WT_5hasex | WT_veg | NOTEST | 0 | 0 | 0 | 0 | 1 | 1 no |
| tS(AGA)5 | ChrVII_A_nidulans_FGSC_A4:4243997-4244078  | WT_5hasex | WT_veg | NOTEST | 0 | 0 | 0 | 0 | 1 | 1 no |
| tS(CGA)1 | ChrI_A_nidulans_FGSC_A4:2750864-2750963    | WT_5hasex | WT_veg | NOTEST | 0 | 0 | 0 | 0 | 1 | 1 no |
| tS(CGA)2 | ChrIII_A_nidulans_FGSC_A4:2757627-2757734  | WT_5hasex | WT_veg | NOTEST | 0 | 0 | 0 | 0 | 1 | 1 no |
| tS(GCT)1 | ChrIII_A_nidulans_FGSC_A4:2237367-2237468  | WT_5hasex | WT_veg | NOTEST | 0 | 0 | 0 | 0 | 1 | 1 no |
| tS(GCT)2 | ChrIII_A_nidulans_FGSC_A4:2237874-2237975  | WT_5hasex | WT_veg | NOTEST | 0 | 0 | 0 | 0 | 1 | 1 no |
| tS(GCT)3 | ChrIII_A_nidulans_FGSC_A4:2238517-2238619  | WT_5hasex | WT_veg | NOTEST | 0 | 0 | 0 | 0 | 1 | 1 no |
| tS(GCT)4 | ChrVII_A_nidulans_FGSC_A4:428000-428104    | WT_5hasex | WT_veg | NOTEST | 0 | 0 | 0 | 0 | 1 | 1 no |
| tS(TGA)1 | ChrI_A_nidulans_FGSC_A4:3426446-3426548    | WT_5hasex | WT_veg | NOTEST | 0 | 0 | 0 | 0 | 1 | 1 no |
| tT(AGT)1 | ChrI_A_nidulans_FGSC_A4:2449520-2449630    | WT_5hasex | WT_veg | NOTEST | 0 | 0 | 0 | 0 | 1 | 1 no |
| tT(AGT)2 | ChrVIII_A_nidulans_FGSC_A4:1972702-1972775 | WT_5hasex | WT_veg | NOTEST | 0 | 0 | 0 | 0 | 1 | 1 no |
| tT(AGT)3 | ChrVIII_A_nidulans_FGSC_A4:1976867-1976940 | WT_5hasex | WT_veg | NOTEST | 0 | 0 | 0 | 0 | 1 | 1 no |
| tT(AGT)4 | ChrVIII_A_nidulans_FGSC_A4:1978393-1978466 | WT_5hasex | WT_veg | NOTEST | 0 | 0 | 0 | 0 | 1 | 1 no |
| tT(AGT)5 | ChrVIII_A_nidulans_FGSC_A4:1975258-1975331 | WT_5hasex | WT_veg | NOTEST | 0 | 0 | 0 | 0 | 1 | 1 no |
| tT(AGT)6 | ChrVIII_A_nidulans_FGSC_A4:219405-219478   | WT_5hasex | WT_veg | NOTEST | 0 | 0 | 0 | 0 | 1 | 1 no |
| tT(CGT)1 | ChrVII_A_nidulans_FGSC_A4:1969886-1969987  | WT_5hasex | WT_veg | NOTEST | 0 | 0 | 0 | 0 | 1 | 1 no |
| tT(CGT)2 | ChrVIII_A_nidulans_FGSC_A4:1140323-1140405 | WT_5hasex | WT_veg | NOTEST | 0 | 0 | 0 | 0 | 1 | 1 no |
| tT(TGT)1 | ChrVIII_A_nidulans_FGSC_A4:3640896-3640988 | WT_5hasex | WT_veg | NOTEST | 0 | 0 | 0 | 0 | 1 | 1 no |

## Supplementary table 1

|          |                                            |           |        |        |           |         |               |               |            |            |     |
|----------|--------------------------------------------|-----------|--------|--------|-----------|---------|---------------|---------------|------------|------------|-----|
| tT(TGT)2 | ChrVIII_A_nidulans_FGSC_A4:3640077-3640169 | WT_5hasex | WT_veg | NOTEST | 0         | 0       | 0             | 0             | 1          | 1          | no  |
| tV(AAC)1 | ChrII_A_nidulans_FGSC_A4:1988450-1988524   | WT_5hasex | WT_veg | NOTEST | 0         | 0       | 0             | 0             | 1          | 1          | no  |
| tV(AAC)2 | ChrII_A_nidulans_FGSC_A4:2496411-2496485   | WT_5hasex | WT_veg | NOTEST | 0         | 0       | 0             | 0             | 1          | 1          | no  |
| tV(AAC)3 | ChrII_A_nidulans_FGSC_A4:2497034-2497108   | WT_5hasex | WT_veg | OK     | 34,507    | 0       | -1.79769e+308 | -1.79769e+308 | 0,302276   | 0,578089   | no  |
| tV(AAC)4 | ChrII_A_nidulans_FGSC_A4:2499668-2499742   | WT_5hasex | WT_veg | NOTEST | 0         | 0       | 0             | 0             | 1          | 1          | no  |
| tV(AAC)5 | ChrII_A_nidulans_FGSC_A4:2493970-2494044   | WT_5hasex | WT_veg | NOTEST | 0         | 0       | 0             | 0             | 1          | 1          | no  |
| tV(AAC)6 | ChrVIII_A_nidulans_FGSC_A4:844298-844372   | WT_5hasex | WT_veg | NOTEST | 0         | 0       | 0             | 0             | 1          | 1          | no  |
| tV(AAC)7 | ChrVIII_A_nidulans_FGSC_A4:4077901-4077975 | WT_5hasex | WT_veg | OK     | 34,507    | 0       | -1.79769e+308 | -1.79769e+308 | 0,302276   | 0,578089   | no  |
| tV(AAC)8 | ChrVIII_A_nidulans_FGSC_A4:1222174-1222248 | WT_5hasex | WT_veg | NOTEST | 0         | 0       | 0             | 0             | 1          | 1          | no  |
| tV(CAC)1 | ChrII_A_nidulans_FGSC_A4:2496698-2496772   | WT_5hasex | WT_veg | NOTEST | 0         | 0       | 0             | 0             | 1          | 1          | no  |
| tV(CAC)2 | ChrVI_A_nidulans_FGSC_A4:997348-997453     | WT_5hasex | WT_veg | NOTEST | 0         | 0       | 0             | 0             | 1          | 1          | no  |
| tV(TAC)1 | ChrVIII_A_nidulans_FGSC_A4:830681-830755   | WT_5hasex | WT_veg | NOTEST | 0         | 0       | 0             | 0             | 1          | 1          | no  |
| tW(CCA)1 | ChrVIII_A_nidulans_FGSC_A4:1208045-1208117 | WT_5hasex | WT_veg | NOTEST | 0         | 0       | 0             | 0             | 1          | 1          | no  |
| tW(CCA)2 | ChrVIII_A_nidulans_FGSC_A4:1208992-1209064 | WT_5hasex | WT_veg | NOTEST | 0         | 0       | 0             | 0             | 1          | 1          | no  |
| tW(CCA)3 | ChrVIII_A_nidulans_FGSC_A4:1210746-1210818 | WT_5hasex | WT_veg | NOTEST | 0         | 0       | 0             | 0             | 1          | 1          | no  |
| tY(GTA)1 | ChrI_A_nidulans_FGSC_A4:2803519-2803607    | WT_5hasex | WT_veg | NOTEST | 0         | 0       | 0             | 0             | 1          | 1          | no  |
| tY(GTA)2 | ChrII_A_nidulans_FGSC_A4:2910668-2910756   | WT_5hasex | WT_veg | NOTEST | 0         | 0       | 0             | 0             | 1          | 1          | no  |
| tY(GTA)3 | ChrII_A_nidulans_FGSC_A4:2911185-2911273   | WT_5hasex | WT_veg | NOTEST | 0         | 0       | 0             | 0             | 1          | 1          | no  |
| tY(GTA)4 | ChrV_A_nidulans_FGSC_A4:373116-373203      | WT_5hasex | WT_veg | NOTEST | 0         | 0       | 0             | 0             | 1          | 1          | no  |
| tY(GTA)5 | ChrVI_A_nidulans_FGSC_A4:1490479-1490568   | WT_5hasex | WT_veg | NOTEST | 0         | 0       | 0             | 0             | 1          | 1          | no  |
| tamA     | ChrVI_A_nidulans_FGSC_A4:2314121-2316434   | WT_5hasex | WT_veg | OK     | 40,3461   | 40,9469 | 0,0213253     | -0,0388745    | 0,96899    | 0,98877    | no  |
| tapA     | ChrVIII_A_nidulans_FGSC_A4:4532922-4534099 | WT_5hasex | WT_veg | OK     | 48,3416   | 61,8379 | 0,355227      | -0,713686     | 0,475421   | 0,731875   | no  |
| tcsA     | ChrV_A_nidulans_FGSC_A4:3228536-3230930    | WT_5hasex | WT_veg | OK     | 50,3078   | 135,793 | 1,43256       | -2,99755      | 0,00272159 | 0,0180163  | yes |
| tcsB     | ChrVII_A_nidulans_FGSC_A4:1928770-1932342  | WT_5hasex | WT_veg | OK     | 56,5472   | 126,955 | 1,16679       | -2,36465      | 0,0180472  | 0,0823143  | no  |
| tctexA   | ChrVIII_A_nidulans_FGSC_A4:802474-804821   | WT_5hasex | WT_veg | OK     | 120,561   | 199,131 | 0,723948      | -1,50282      | 0,132887   | 0,350447   | no  |
| tdiA     | ChrV_A_nidulans_FGSC_A4:735712-738625      | WT_5hasex | WT_veg | NOTEST | 0,0818122 | 0       | -1.79769e+308 | -1.79769e+308 | 0,224063   | 1          | no  |
| tdiB     | ChrV_A_nidulans_FGSC_A4:739014-740407      | WT_5hasex | WT_veg | NOTEST | 0,7938    | 0       | -1.79769e+308 | -1.79769e+308 | 0,0374437  | 1          | no  |
| tdiC     | ChrV_A_nidulans_FGSC_A4:741057-742125      | WT_5hasex | WT_veg | NOTEST | 0,835749  | 3,10007 | 1,89116       | -1,92117      | 0,0547108  | 1          | no  |
| tdiD     | ChrV_A_nidulans_FGSC_A4:742341-744060      | WT_5hasex | WT_veg | NOTEST | 0         | 0       | 0             | 0             | 1          | 1          | no  |
| tdiE     | ChrV_A_nidulans_FGSC_A4:744086-745471      | WT_5hasex | WT_veg | NOTEST | 0,510033  | 2,10174 | 2,04292       | -1,49609      | 0,13463    | 1          | no  |
| teaA     | ChrIII_A_nidulans_FGSC_A4:1649631-1654262  | WT_5hasex | WT_veg | OK     | 21,0913   | 19,6068 | -0,105293     | 0,214902      | 0,829844   | 0,932311   | no  |
| teaC     | ChrVIII_A_nidulans_FGSC_A4:1515027-1517464 | WT_5hasex | WT_veg | OK     | 18,7535   | 26,9238 | 0,52172       | -1,00993      | 0,312527   | 0,588764   | no  |
| teaR     | ChrII_A_nidulans_FGSC_A4:1721209-1722889   | WT_5hasex | WT_veg | OK     | 29,7105   | 59,2    | 0,994623      | -1,96987      | 0,048853   | 0,174792   | no  |
| thiF     | ChrII_A_nidulans_FGSC_A4:2623804-2625358   | WT_5hasex | WT_veg | OK     | 1359,13   | 1831,84 | 0,430607      | -0,541161     | 0,588397   | 0,806138   | no  |
| tigA     | ChrVIII_A_nidulans_FGSC_A4:4688906-4690067 | WT_5hasex | WT_veg | OK     | 134,53    | 191,281 | 0,507763      | -1,0482       | 0,294548   | 0,56928    | no  |
| tilA     | ChrVIII_A_nidulans_FGSC_A4:2122437-2124515 | WT_5hasex | WT_veg | OK     | 26,473    | 18,2294 | -0,538249     | 0,98521       | 0,324521   | 0,601031   | no  |
| tinA     | ChrVI_A_nidulans_FGSC_A4:396890-398786     | WT_5hasex | WT_veg | OK     | 33,2243   | 46,673  | 0,49035       | -0,998183     | 0,318191   | 0,594322   | no  |
| tinC     | ChrVI_A_nidulans_FGSC_A4:539323-544557     | WT_5hasex | WT_veg | OK     | 86,9883   | 120,388 | 0,4688        | -0,910508     | 0,362555   | 0,637353   | no  |
| tlgB     | ChrVII_A_nidulans_FGSC_A4:2694754-2696312  | WT_5hasex | WT_veg | OK     | 52,7795   | 68,4527 | 0,375131      | -0,760174     | 0,447151   | 0,710199   | no  |
| tmpA     | ChrVIII_A_nidulans_FGSC_A4:4736178-4738059 | WT_5hasex | WT_veg | OK     | 32,1778   | 25,3605 | -0,343484     | 0,633547      | 0,526377   | 0,767364   | no  |
| top1     | ChrVIII_A_nidulans_FGSC_A4:4134579-4137933 | WT_5hasex | WT_veg | OK     | 44,4057   | 158,911 | 1,8394        | -3,78028      | 0,00015665 | 0,00161292 | yes |
| top2     | ChrV_A_nidulans_FGSC_A4:2905231-2910535    | WT_5hasex | WT_veg | OK     | 31,487    | 70,3876 | 1,16056       | -2,36086      | 0,0182327  | 0,0829436  | no  |
| torA     | ChrI_A_nidulans_FGSC_A4:1592217-1599573    | WT_5hasex | WT_veg | OK     | 24,9938   | 51,4454 | 1,04147       | -2,1324       | 0,0329742  | 0,130497   | no  |
| tpiA     | ChrI_A_nidulans_FGSC_A4:3517592-3518928    | WT_5hasex | WT_veg | OK     | 479,167   | 931,761 | 0,959433      | -1,85946      | 0,0629618  | 0,209023   | no  |
| tpiB     | ChrI_A_nidulans_FGSC_A4:1841637-1842943    | WT_5hasex | WT_veg | OK     | 109,973   | 345,208 | 1,65032       | -3,37267      | 0,00074444 | 0,006104   | yes |
| tpmA     | ChrV_A_nidulans_FGSC_A4:1983638-1984671    | WT_5hasex | WT_veg | OK     | 725,419   | 1708,89 | 1,23618       | -2,26462      | 0,023536   | 0,100771   | no  |
| tprA     | ChrII_A_nidulans_FGSC_A4:3583527-3587994   | WT_5hasex | WT_veg | NOTEST | 1,08247   | 2,85112 | 1,39721       | -1,7205       | 0,0853425  | 1          | no  |
| tpsA     | ChrV_A_nidulans_FGSC_A4:2521594-2524068    | WT_5hasex | WT_veg | OK     | 226,402   | 919,495 | 2,02195       | -3,62946      | 0,00028401 | 0,00269225 | yes |
| treA     | ChrVIII_A_nidulans_FGSC_A4:333423-336481   | WT_5hasex | WT_veg | OK     | 26,7418   | 96,352  | 1,84922       | -3,85162      | 0,00011734 | 0,00126256 | yes |
| treB     | ChrV_A_nidulans_FGSC_A4:2136479-2139545    | WT_5hasex | WT_veg | OK     | 118,276   | 311,824 | 1,39857       | -2,53057      | 0,0113879  | 0,0577335  | no  |
| trkA     | ChrV_A_nidulans_FGSC_A4:2133504-2135962    | WT_5hasex | WT_veg | OK     | 1,87766   | 5,15873 | 1,45808       | -1,92981      | 0,05363    | 0,18646    | no  |
| trkB     | ChrII_A_nidulans_FGSC_A4:542654-545144     | WT_5hasex | WT_veg | OK     | 14,3482   | 79,6437 | 2,47269       | -4,79375      | 1,6369E-06 | 2,8698E-05 | yes |
| trkC     | ChrVIII_A_nidulans_FGSC_A4:1989386-1991745 | WT_5hasex | WT_veg | OK     | 15,981    | 44,5084 | 1,47772       | -2,805        | 0,00503164 | 0,0298841  | yes |

## Supplementary table 1

|       |                                            |           |        |        |          |         |               |               |            |            |     |
|-------|--------------------------------------------|-----------|--------|--------|----------|---------|---------------|---------------|------------|------------|-----|
| trm1  | ChrVIII_A_nidulans_FGSC_A4:530330-532511   | WT_5hasex | WT_veg | OK     | 8,11921  | 20,8821 | 1,36285       | -2,37721      | 0,0174442  | 0,0802485  | no  |
| trp   | Contig-mt188_A_nidulans_FGSC_A4:4455-4526  | WT_5hasex | WT_veg | NOTEST | 0        | 0       | 0             | 0             | 1          | 1          | no  |
| trpB  | ChrI_A_nidulans_FGSC_A4:818732-821348      | WT_5hasex | WT_veg | OK     | 60,44    | 87,2921 | 0,530347      | -1,10268      | 0,270164   | 0,542233   | no  |
| trpC  | ChrVIII_A_nidulans_FGSC_A4:2900978-2903029 | WT_5hasex | WT_veg | OK     | 63,6049  | 70,721  | 0,153         | -0,315617     | 0,752293   | 0,896884   | no  |
| trxA  | ChrVIII_A_nidulans_FGSC_A4:4387376-4388858 | WT_5hasex | WT_veg | OK     | 1728,64  | 2981,78 | 0,786535      | -1,19564      | 0,231836   | 0,496166   | no  |
| trxB  | ChrII_A_nidulans_FGSC_A4:1181567-1186594   | WT_5hasex | WT_veg | OK     | 225,692  | 147,247 | -0,616114     | 1,19721       | 0,231225   | 0,49543    | no  |
| trxR  | ChrII_A_nidulans_FGSC_A4:3700957-3702453   | WT_5hasex | WT_veg | OK     | 233,357  | 614,256 | 1,3963        | -2,52586      | 0,0115416  | 0,0583509  | no  |
| tubA  | ChrVIII_A_nidulans_FGSC_A4:3934406-3936443 | WT_5hasex | WT_veg | OK     | 449,57   | 650,197 | 0,532331      | -0,967087     | 0,333501   | 0,609876   | no  |
| tubB  | ChrIV_A_nidulans_FGSC_A4:1977568-1979680   | WT_5hasex | WT_veg | OK     | 259,59   | 444,825 | 0,777003      | -1,48926      | 0,136419   | 0,356559   | no  |
| tubC  | ChrI_A_nidulans_FGSC_A4:3345159-3347052    | WT_5hasex | WT_veg | OK     | 445,894  | 357,213 | -0,319915     | 0,583531      | 0,559536   | 0,78866    | no  |
| tyr   | Contig-mt188_A_nidulans_FGSC_A4:6775-6860  | WT_5hasex | WT_veg | NOTEST | 0        | 0       | 0             | 0             | 1          | 1          | no  |
| uaW   | ChrVIII_A_nidulans_FGSC_A4:4701323-4701980 | WT_5hasex | WT_veg | OK     | 61,6204  | 255,324 | 2,05085       | -3,81271      | 0,00013745 | 0,00144575 | yes |
| uaX   | ChrVI_A_nidulans_FGSC_A4:2428608-2429055   | WT_5hasex | WT_veg | OK     | 81,5357  | 1025,3  | 3,65247       | -6,76914      | 1,2955E-11 | 6,0614E-10 | yes |
| uaY   | ChrVIII_A_nidulans_FGSC_A4:2148804-2152088 | WT_5hasex | WT_veg | OK     | 73,8915  | 26,9613 | -1,45452      | 2,90221       | 0,0037054  | 0,0233245  | yes |
| uaZ   | ChrI_A_nidulans_FGSC_A4:1659243-1660314    | WT_5hasex | WT_veg | OK     | 2089,52  | 9735,02 | 2,22001       | -2,69625      | 0,00701249 | 0,0391883  | yes |
| uapA  | ChrI_A_nidulans_FGSC_A4:3618699-3620606    | WT_5hasex | WT_veg | OK     | 95,6755  | 235,529 | 1,29969       | -2,09084      | 0,0365423  | 0,14106    | no  |
| uapC  | ChrI_A_nidulans_FGSC_A4:2999027-3000895    | WT_5hasex | WT_veg | OK     | 84,3939  | 391,588 | 2,21413       | -4,57909      | 4,67E-06   | 7,266E-05  | yes |
| ubi1  | ChrIII_A_nidulans_FGSC_A4:716806-717378    | WT_5hasex | WT_veg | OK     | 3487,32  | 6856,06 | 0,975262      | -1,49367      | 0,135261   | 0,354564   | no  |
| ubi4  | ChrVII_A_nidulans_FGSC_A4:2514248-2515747  | WT_5hasex | WT_veg | OK     | 5356,49  | 8927,99 | 0,737049      | -0,733315     | 0,463366   | 0,72268    | no  |
| ugeA  | ChrIII_A_nidulans_FGSC_A4:1167763-1169224  | WT_5hasex | WT_veg | OK     | 317,816  | 280,753 | -0,178892     | 0,347502      | 0,728214   | 0,884836   | no  |
| ugmA  | ChrVI_A_nidulans_FGSC_A4:1789203-1791438   | WT_5hasex | WT_veg | OK     | 237,285  | 271,791 | 0,195877      | -0,378539     | 0,70503    | 0,87233    | no  |
| uncA  | ChrIV_A_nidulans_FGSC_A4:1911469-1916437   | WT_5hasex | WT_veg | OK     | 6,60514  | 10,3035 | 0,641477      | -1,22475      | 0,220668   | 0,482157   | no  |
| uncB  | ChrI_A_nidulans_FGSC_A4:3404302-3406890    | WT_5hasex | WT_veg | OK     | 28,6885  | 49,3854 | 0,783609      | -1,56589      | 0,117375   | 0,322773   | no  |
| ungA  | ChrVI_A_nidulans_FGSC_A4:451574-453436     | WT_5hasex | WT_veg | OK     | 163,849  | 221,033 | 0,431895      | -0,854652     | 0,392744   | 0,665973   | no  |
| ureA  | ChrVIII_A_nidulans_FGSC_A4:3607320-3609496 | WT_5hasex | WT_veg | OK     | 53,3613  | 127,699 | 1,25888       | -2,06927      | 0,0385207  | 0,146698   | no  |
| ureB  | ChrVIII_A_nidulans_FGSC_A4:3571085-3574015 | WT_5hasex | WT_veg | OK     | 98,7135  | 297,55  | 1,59181       | -2,56908      | 0,0101969  | 0,0528993  | no  |
| ureD  | ChrVIII_A_nidulans_FGSC_A4:4207496-4208506 | WT_5hasex | WT_veg | OK     | 258,826  | 302,934 | 0,227019      | -0,459778     | 0,645676   | 0,839041   | no  |
| urhA  | ChrVI_A_nidulans_FGSC_A4:1515287-1516400   | WT_5hasex | WT_veg | NOTEST | 0,384176 | 3,70838 | 3,27095       | -2,36186      | 0,0181837  | 1          | no  |
| urhB  | ChrIV_A_nidulans_FGSC_A4:2797094-2798277   | WT_5hasex | WT_veg | NOTEST | 0,205623 | 0       | -1.79769e+308 | -1.79769e+308 | 0,224063   | 1          | no  |
| urhC  | ChrVIII_A_nidulans_FGSC_A4:469401-470630   | WT_5hasex | WT_veg | OK     | 12,5964  | 8,10697 | -0,635774     | 1,0078        | 0,313548   | 0,589628   | no  |
| usgS  | ChrIII_A_nidulans_FGSC_A4:1616942-1618221  | WT_5hasex | WT_veg | OK     | 26,4312  | 138,979 | 2,39455       | -4,53128      | 5,8628E-06 | 8,9232E-05 | yes |
| uvsB  | ChrIV_A_nidulans_FGSC_A4:1419866-1428834   | WT_5hasex | WT_veg | OK     | 11,3803  | 26,9811 | 1,24541       | -2,52087      | 0,0117067  | 0,0589801  | no  |
| uvsC  | ChrVIII_A_nidulans_FGSC_A4:1108553-1109991 | WT_5hasex | WT_veg | OK     | 66,621   | 172,182 | 1,36989       | -2,84231      | 0,00447885 | 0,0272479  | yes |
| uvsD  | ChrV_A_nidulans_FGSC_A4:1352681-1355112    | WT_5hasex | WT_veg | OK     | 22,2266  | 123,427 | 2,4733        | -4,90334      | 9,422E-07  | 1,7417E-05 | yes |
| uvsF  | ChrI_A_nidulans_FGSC_A4:610119-613889      | WT_5hasex | WT_veg | OK     | 27,204   | 39,9826 | 0,555553      | -1,15382      | 0,248572   | 0,516707   | no  |
| uvsH  | ChrIV_A_nidulans_FGSC_A4:342205-345524     | WT_5hasex | WT_veg | OK     | 22,1745  | 51,278  | 1,20944       | -2,38658      | 0,0170059  | 0,0787716  | no  |
| uvsI  | ChrIII_A_nidulans_FGSC_A4:987119-992111    | WT_5hasex | WT_veg | OK     | 4,10232  | 5,38275 | 0,391902      | -0,695498     | 0,486743   | 0,740507   | no  |
| uvsJ  | ChrV_A_nidulans_FGSC_A4:3087593-3088496    | WT_5hasex | WT_veg | OK     | 91,0636  | 165,163 | 0,858941      | -1,77061      | 0,0766255  | 0,240468   | no  |
| vcxA  | ChrVIII_A_nidulans_FGSC_A4:3454271-3456082 | WT_5hasex | WT_veg | OK     | 75,4125  | 311,308 | 2,04547       | -4,2222       | 2,4193E-05 | 0,00031567 | yes |
| veA   | ChrVIII_A_nidulans_FGSC_A4:1667030-1669644 | WT_5hasex | WT_veg | OK     | 64,7807  | 169,326 | 1,38617       | -2,61585      | 0,00890068 | 0,047535   | yes |
| velB  | ChrVIII_A_nidulans_FGSC_A4:3785693-3787657 | WT_5hasex | WT_veg | OK     | 34,039   | 62,8209 | 0,884055      | -1,8026       | 0,0714513  | 0,228793   | no  |
| velC  | ChrVII_A_nidulans_FGSC_A4:2718525-2719428  | WT_5hasex | WT_veg | OK     | 16,6973  | 43,0473 | 1,36631       | -2,22217      | 0,0262718  | 0,109606   | no  |
| vmaA  | ChrII_A_nidulans_FGSC_A4:523767-525489     | WT_5hasex | WT_veg | OK     | 91,2095  | 110,929 | 0,282376      | -0,585198     | 0,558415   | 0,787705   | no  |
| vmaB  | ChrI_A_nidulans_FGSC_A4:816476-818621      | WT_5hasex | WT_veg | OK     | 204,402  | 319,091 | 0,642561      | -1,28548      | 0,198625   | 0,452556   | no  |
| vosA  | ChrVII_A_nidulans_FGSC_A4:2387002-2388952  | WT_5hasex | WT_veg | OK     | 10,1007  | 34,8081 | 1,78497       | -2,94717      | 0,00320701 | 0,0206632  | yes |
| vps11 | ChrVII_A_nidulans_FGSC_A4:4012400-4015722  | WT_5hasex | WT_veg | OK     | 40,3524  | 83,7603 | 1,05361       | -2,19501      | 0,0281628  | 0,115482   | no  |
| vps16 | ChrI_A_nidulans_FGSC_A4:3545724-3548506    | WT_5hasex | WT_veg | OK     | 22,8173  | 34,2536 | 0,586127      | -1,1817       | 0,237325   | 0,502742   | no  |
| vps19 | ChrVI_A_nidulans_FGSC_A4:1683478-1686050   | WT_5hasex | WT_veg | OK     | 20,0622  | 17,4869 | -0,198202     | 0,393784      | 0,69374    | 0,865776   | no  |
| vps24 | ChrI_A_nidulans_FGSC_A4:3576410-3577682    | WT_5hasex | WT_veg | OK     | 70,9375  | 137,942 | 0,959444      | -1,98649      | 0,0469794  | 0,169992   | no  |
| vps3  | ChrVIII_A_nidulans_FGSC_A4:2539626-2543400 | WT_5hasex | WT_veg | OK     | 20,7993  | 18,5195 | -0,167493     | 0,3433        | 0,731373   | 0,886524   | no  |
| vps32 | ChrII_A_nidulans_FGSC_A4:1644608-1645447   | WT_5hasex | WT_veg | OK     | 102,225  | 373,898 | 1,87089       | -3,8554       | 0,00011554 | 0,00124607 | yes |
| vps34 | ChrIII_A_nidulans_FGSC_A4:1216758-1219511  | WT_5hasex | WT_veg | OK     | 18,6585  | 25,6952 | 0,461665      | -0,900024     | 0,368108   | 0,64294    | no  |
| vps45 | ChrI_A_nidulans_FGSC_A4:2387341-2389242    | WT_5hasex | WT_veg | OK     | 20,2326  | 40,7405 | 1,00978       | -1,95834      | 0,0501898  | 0,178031   | no  |

## Supplementary table 1

|       |                                            |           |        |        |           |          |               |               |            |            |     |
|-------|--------------------------------------------|-----------|--------|--------|-----------|----------|---------------|---------------|------------|------------|-----|
| vps52 | ChrII_A_nidulans_FGSC_A4:2335791-2338277   | WT_5hasex | WT_veg | OK     | 41,0419   | 41,3093  | 0,00937204    | -0,0192907    | 0,984609   | 0,994448   | no  |
| vps8  | ChrVIII_A_nidulans_FGSC_A4:4160498-4165397 | WT_5hasex | WT_veg | OK     | 15,2245   | 18,7623  | 0,301442      | -0,621805     | 0,53407    | 0,772323   | no  |
| vpsA  | ChrII_A_nidulans_FGSC_A4:526418-529323     | WT_5hasex | WT_veg | OK     | 116,779   | 213,851  | 0,872818      | -1,75045      | 0,0800415  | 0,247954   | no  |
| vpsT  | ChrVII_A_nidulans_FGSC_A4:574035-578499    | WT_5hasex | WT_veg | OK     | 38,6533   | 55,6518  | 0,525839      | -0,99974      | 0,317436   | 0,593661   | no  |
| wA    | ChrII_A_nidulans_FGSC_A4:1139654-1146473   | WT_5hasex | WT_veg | NOTEST | 1,38375   | 1,90912  | 0,46432       | -0,692921     | 0,488359   | 1          | no  |
| wetA  | ChrVII_A_nidulans_FGSC_A4:2312600-2314268  | WT_5hasex | WT_veg | NOTEST | 1,48367   | 2,90741  | 0,970562      | -1,1          | 0,271331   | 1          | no  |
| wscA  | ChrV_A_nidulans_FGSC_A4:2054212-2056161    | WT_5hasex | WT_veg | OK     | 500,573   | 893,887  | 0,836512      | -1,49004      | 0,136213   | 0,356175   | no  |
| wscB  | ChrI_A_nidulans_FGSC_A4:3602817-3603482    | WT_5hasex | WT_veg | OK     | 41,1441   | 92,0616  | 1,16191       | -2,12493      | 0,0335922  | 0,132443   | no  |
| xanA  | ChrVIII_A_nidulans_FGSC_A4:3401427-3402667 | WT_5hasex | WT_veg | OK     | 53,9356   | 362,549  | 2,74886       | -4,87556      | 1,085E-06  | 1,972E-05  | yes |
| xgcA  | ChrVII_A_nidulans_FGSC_A4:1111058-1113491  | WT_5hasex | WT_veg | OK     | 8,81644   | 3,51484  | -1,32674      | 2,19029       | 0,0285031  | 0,116503   | no  |
| xgeA  | ChrVII_A_nidulans_FGSC_A4:3751879-3754062  | WT_5hasex | WT_veg | OK     | 173,532   | 289,685  | 0,739282      | -1,43992      | 0,149891   | 0,378719   | no  |
| xgeB  | ChrIII_A_nidulans_FGSC_A4:116728-119739    | WT_5hasex | WT_veg | NOTEST | 0,0901313 | 0,552423 | 2,61567       | -1,26339      | 0,20645    | 1          | no  |
| xghA  | ChrVI_A_nidulans_FGSC_A4:866686-867953     | WT_5hasex | WT_veg | NOTEST | 0,177357  | 0        | -1.79769e+308 | -1.79769e+308 | 0,224063   | 1          | no  |
| xlnA  | ChrII_A_nidulans_FGSC_A4:3600780-3601529   | WT_5hasex | WT_veg | NOTEST | 0,65699   | 0,255065 | -1,36501      | 0,428564      | 0,66824    | 1          | no  |
| xlnB  | ChrVIII_A_nidulans_FGSC_A4:416475-417187   | WT_5hasex | WT_veg | OK     | 17,314    | 2,50636  | -2,78827      | 2,80044       | 0,00510332 | 0,0302346  | yes |
| xlnC  | ChrVII_A_nidulans_FGSC_A4:1985908-1987661  | WT_5hasex | WT_veg | OK     | 8,73851   | 6,99968  | -0,320097     | 0,477932      | 0,632699   | 0,831924   | no  |
| xlnD  | ChrVII_A_nidulans_FGSC_A4:3678455-3680867  | WT_5hasex | WT_veg | OK     | 6,97612   | 3,03729  | -1,19964      | 1,90926       | 0,0562281  | 0,192831   | no  |
| xlnE  | ChrIV_A_nidulans_FGSC_A4:65998-67492       | WT_5hasex | WT_veg | NOTEST | 0         | 0        | 0             | 0             | 1          | 1          | no  |
| xlnR  | ChrIV_A_nidulans_FGSC_A4:2136514-2139504   | WT_5hasex | WT_veg | OK     | 8,69082   | 9,20225  | 0,082494      | -0,149156     | 0,881431   | 0,954924   | no  |
| xprF  | ChrVII_A_nidulans_FGSC_A4:3126723-3128644  | WT_5hasex | WT_veg | OK     | 71,3199   | 57,8478  | -0,302042     | 0,617451      | 0,536937   | 0,773675   | no  |
| xprG  | ChrVII_A_nidulans_FGSC_A4:710127-712716    | WT_5hasex | WT_veg | OK     | 43,1226   | 113,704  | 1,39876       | -2,42117      | 0,0154706  | 0,0732001  | no  |
| xptA  | ChrI_A_nidulans_FGSC_A4:3155576-3156969    | WT_5hasex | WT_veg | NOTEST | 0,712189  | 0        | -1.79769e+308 | -1.79769e+308 | 0,0399057  | 1          | no  |
| yA    | ChrI_A_nidulans_FGSC_A4:2686882-2689030    | WT_5hasex | WT_veg | OK     | 11,2656   | 47,3175  | 2,07045       | -3,72036      | 0,00019894 | 0,00198401 | yes |
| ygA   | ChrII_A_nidulans_FGSC_A4:3558977-3562526   | WT_5hasex | WT_veg | OK     | 18,7564   | 26,2806  | 0,486615      | -1,00406      | 0,31535    | 0,59153    | no  |
| ypdA  | ChrVII_A_nidulans_FGSC_A4:2534012-2535212  | WT_5hasex | WT_veg | OK     | 205,086   | 702,907  | 1,77711       | -3,57472      | 0,00035061 | 0,00321255 | yes |
| zapA  | ChrVIII_A_nidulans_FGSC_A4:1009239-1011207 | WT_5hasex | WT_veg | OK     | 8,51513   | 13,0578  | 0,61681       | -1,03947      | 0,298588   | 0,573997   | no  |

## Supplementary table 2

| test_id | locus                                      | sample_1  | sample_2 | status | value_1  | value_2 | log2FC        | test_stat     | p_value     | q_value     | significant |
|---------|--------------------------------------------|-----------|----------|--------|----------|---------|---------------|---------------|-------------|-------------|-------------|
| aatB    | ChrI_A_nidulans_FGSC_A4:3125436-3126746    | WT_5hasex | WT_veg   | OK     | 21,052   | 101,988 | 2,27637       | -3,78972      | 0,000150815 | 0,00156094  | yes         |
| abaA    | ChrVIII_A_nidulans_FGSC_A4:3598379-3600871 | WT_5hasex | WT_veg   | OK     | 1,53871  | 8,79403 | 2,5148        | -3,45081      | 0,000558903 | 0,00478948  | yes         |
| abnC    | ChrII_A_nidulans_FGSC_A4:483953-485961     | WT_5hasex | WT_veg   | OK     | 45,0572  | 3,39757 | -3,72918      | 5,16787       | 2,36776E-07 | 5,05193E-06 | yes         |
| abnD    | ChrVI_A_nidulans_FGSC_A4:2021730-2022857   | WT_5hasex | WT_veg   | OK     | 45,2567  | 185,856 | 2,03798       | -4,11527      | 3,86725E-05 | 0,00047898  | yes         |
| abpA    | ChrVII_A_nidulans_FGSC_A4:598592-601226    | WT_5hasex | WT_veg   | OK     | 124,541  | 349,933 | 1,49046       | -2,95558      | 0,00312086  | 0,0202076   | yes         |
| accA    | ChrI_A_nidulans_FGSC_A4:1174373-1181649    | WT_5hasex | WT_veg   | OK     | 81,2612  | 284,517 | 1,80788       | -3,17357      | 0,00150579  | 0,0110297   | yes         |
| aciA    | ChrI_A_nidulans_FGSC_A4:2370052-2371883    | WT_5hasex | WT_veg   | OK     | 614,163  | 126,051 | -2,28461      | 4,11703       | 0,000038379 | 0,000475671 | yes         |
| aclA    | ChrVII_A_nidulans_FGSC_A4:3944250-3946168  | WT_5hasex | WT_veg   | OK     | 365,676  | 1252,41 | 1,77607       | -3,12951      | 0,001751    | 0,0125093   | yes         |
| aclB    | ChrVII_A_nidulans_FGSC_A4:3947632-3950242  | WT_5hasex | WT_veg   | OK     | 233,491  | 1162,8  | 2,31616       | -4,15109      | 3,30893E-05 | 0,000418044 | yes         |
| acuE    | ChrI_A_nidulans_FGSC_A4:2741919-2743963    | WT_5hasex | WT_veg   | OK     | 180,656  | 747,546 | 2,04892       | -3,76848      | 0,000164246 | 0,00168201  | yes         |
| acuF    | ChrVII_A_nidulans_FGSC_A4:2254709-2257396  | WT_5hasex | WT_veg   | OK     | 96,3821  | 993,04  | 3,36502       | -6,5792       | 4,72997E-11 | 2,04336E-09 | yes         |
| acuG    | ChrV_A_nidulans_FGSC_A4:2254173-2255661    | WT_5hasex | WT_veg   | OK     | 152,968  | 800,672 | 2,38798       | -4,72889      | 2,2575E-06  | 3,82566E-05 | yes         |
| acuK    | ChrIV_A_nidulans_FGSC_A4:1633968-1636138   | WT_5hasex | WT_veg   | OK     | 41,4066  | 108,693 | 1,39232       | -2,89153      | 0,00383376  | 0,0239648   | yes         |
| agaA    | ChrVI_A_nidulans_FGSC_A4:2453810-2455322   | WT_5hasex | WT_veg   | OK     | 181,367  | 744,513 | 2,03738       | -4,07907      | 4,52153E-05 | 0,000548847 | yes         |
| agdE    | ChrVIII_A_nidulans_FGSC_A4:2006879-2009840 | WT_5hasex | WT_veg   | OK     | 15,479   | 3,62821 | -2,09298      | 3,21808       | 0,00129054  | 0,00969144  | yes         |
| agnC    | ChrVII_A_nidulans_FGSC_A4:55370-57647      | WT_5hasex | WT_veg   | OK     | 4,19425  | 0       | -1.79769e+308 | -1.79769e+308 | 0,00826448  | 0,0447623   | yes         |
| agsA    | ChrI_A_nidulans_FGSC_A4:1910172-1918091    | WT_5hasex | WT_veg   | OK     | 21,7224  | 3,75727 | -2,53143      | 3,89095       | 0,000099852 | 0,00109414  | yes         |
| agsB    | ChrVI_A_nidulans_FGSC_A4:1170030-1177766   | WT_5hasex | WT_veg   | OK     | 58,5105  | 159,754 | 1,44909       | -2,63959      | 0,00830052  | 0,044874    | yes         |
| ahbB    | ChrV_A_nidulans_FGSC_A4:1262159-1264052    | WT_5hasex | WT_veg   | OK     | 12,2227  | 42,0629 | 1,78299       | -3,24559      | 0,00117209  | 0,00895464  | yes         |
| aifA    | ChrVI_A_nidulans_FGSC_A4:424963-426939     | WT_5hasex | WT_veg   | OK     | 102,194  | 405,263 | 1,98755       | -3,92299      | 8,74585E-05 | 0,000976769 | yes         |
| alcC    | ChrVII_A_nidulans_FGSC_A4:3445133-3446641  | WT_5hasex | WT_veg   | OK     | 3863,4   | 456,66  | -3,08068      | 3,91491       | 9,04364E-05 | 0,00100574  | yes         |
| alcU    | ChrVII_A_nidulans_FGSC_A4:225289-226718    | WT_5hasex | WT_veg   | OK     | 174,809  | 2663,78 | 3,92962       | -5,62358      | 1,87044E-08 | 5,10228E-07 | yes         |
| amc-1   | ChrVII_A_nidulans_FGSC_A4:571099-572825    | WT_5hasex | WT_veg   | OK     | 48,1902  | 172,546 | 1,84017       | -3,83048      | 0,000127891 | 0,00136048  | yes         |
| ampB    | ChrIII_A_nidulans_FGSC_A4:2656967-2657908  | WT_5hasex | WT_veg   | OK     | 190,447  | 761,015 | 1,99853       | -4,10965      | 3,96256E-05 | 0,000488924 | yes         |
| amyG    | ChrVI_A_nidulans_FGSC_A4:1162612-1164648   | WT_5hasex | WT_veg   | OK     | 23,5236  | 81,1476 | 1,78644       | -3,53343      | 0,0004102   | 0,00367379  | yes         |
| AN0011  | ChrVIII_A_nidulans_FGSC_A4:4894569-4896034 | WT_5hasex | WT_veg   | OK     | 7,22562  | 24,6974 | 1,77317       | -2,71284      | 0,00667091  | 0,0376894   | yes         |
| AN0018  | ChrVIII_A_nidulans_FGSC_A4:4846513-4848316 | WT_5hasex | WT_veg   | OK     | 0,378118 | 4,34483 | 3,52239       | -3,55318      | 0,0003806   | 0,003444    | yes         |
| AN0030  | ChrVIII_A_nidulans_FGSC_A4:4814161-4815730 | WT_5hasex | WT_veg   | OK     | 0,803964 | 5,33271 | 2,72967       | -2,95251      | 0,00315199  | 0,0203713   | yes         |
| AN0031  | ChrVIII_A_nidulans_FGSC_A4:4812355-4813933 | WT_5hasex | WT_veg   | OK     | 10,0029  | 43,0269 | 2,10482       | -3,42087      | 0,000624205 | 0,00526216  | yes         |
| AN0034  | ChrVIII_A_nidulans_FGSC_A4:4806822-4808836 | WT_5hasex | WT_veg   | OK     | 20,0647  | 120,449 | 2,58569       | -4,50206      | 6,72984E-06 | 0,00010099  | yes         |
| AN0043  | ChrVIII_A_nidulans_FGSC_A4:4770368-4771612 | WT_5hasex | WT_veg   | OK     | 19,5101  | 67,4958 | 1,79058       | -3,26871      | 0,0010804   | 0,00837381  | yes         |
| AN0045  | ChrVIII_A_nidulans_FGSC_A4:4764731-4766336 | WT_5hasex | WT_veg   | OK     | 675,819  | 9831,42 | 3,86269       | -4,75356      | 1,99864E-06 | 3,43725E-05 | yes         |
| AN0056  | ChrVIII_A_nidulans_FGSC_A4:4733546-4735434 | WT_5hasex | WT_veg   | OK     | 37,4486  | 338,174 | 3,17478       | -6,04296      | 1,51312E-09 | 5,1454E-08  | yes         |
| AN0061  | ChrVIII_A_nidulans_FGSC_A4:4717762-4719633 | WT_5hasex | WT_veg   | OK     | 139,293  | 868,528 | 2,64045       | -5,23258      | 1,67157E-07 | 3,68816E-06 | yes         |
| AN0072  | ChrVIII_A_nidulans_FGSC_A4:4695138-4696366 | WT_5hasex | WT_veg   | OK     | 22,0221  | 74,7037 | 1,76223       | -3,25343      | 0,00114019  | 0,00874792  | yes         |
| AN0073  | ChrVIII_A_nidulans_FGSC_A4:4691012-4694821 | WT_5hasex | WT_veg   | OK     | 20,5025  | 55,4868 | 1,43634       | -2,80295      | 0,00506382  | 0,030046    | yes         |
| AN0074  | ChrVIII_A_nidulans_FGSC_A4:4691012-4694821 | WT_5hasex | WT_veg   | OK     | 37,3422  | 128,411 | 1,78189       | -3,6273       | 0,000286402 | 0,00271295  | yes         |
| AN0091  | ChrVIII_A_nidulans_FGSC_A4:4646137-4647700 | WT_5hasex | WT_veg   | OK     | 46,6989  | 129,512 | 1,47162       | -2,83594      | 0,00456916  | 0,0276701   | yes         |
| AN0092  | ChrVIII_A_nidulans_FGSC_A4:4643142-4645797 | WT_5hasex | WT_veg   | OK     | 19,4711  | 153,003 | 2,97415       | -6,00695      | 1,89042E-09 | 6,2539E-08  | yes         |
| AN0097  | ChrVIII_A_nidulans_FGSC_A4:4624823-4628267 | WT_5hasex | WT_veg   | OK     | 20,4623  | 87,5354 | 2,0969        | -4,24036      | 0,000022316 | 0,000293852 | yes         |
| AN0104  | ChrVIII_A_nidulans_FGSC_A4:4600677-4602038 | WT_5hasex | WT_veg   | OK     | 21,3309  | 61,2924 | 1,52276       | -2,80619      | 0,00501309  | 0,0297875   | yes         |
| AN0105  | ChrVIII_A_nidulans_FGSC_A4:4600078-4600539 | WT_5hasex | WT_veg   | OK     | 26,325   | 98,0764 | 1,89747       | -3,05222      | 0,00227159  | 0,0155217   | yes         |
| AN0116  | ChrVIII_A_nidulans_FGSC_A4:4555075-4555635 | WT_5hasex | WT_veg   | OK     | 125,324  | 442,262 | 1,81924       | -3,66342      | 0,000248871 | 0,00240526  | yes         |
| AN0117  | ChrVIII_A_nidulans_FGSC_A4:4553065-4554620 | WT_5hasex | WT_veg   | OK     | 250,162  | 647,402 | 1,3718        | -2,67947      | 0,00737385  | 0,0408202   | yes         |



## Supplementary table 2

|        |                                            |           |        |    |         |         |          |          |             |             |     |
|--------|--------------------------------------------|-----------|--------|----|---------|---------|----------|----------|-------------|-------------|-----|
| AN0124 | ChrVIII_A_nidulans_FGSC_A4:4525021-4526381 | WT_5hasex | WT_veg | OK | 25,3654 | 102,987 | 2,02153  | -3,88085 | 0,000104091 | 0,0011359   | yes |
| AN0133 | ChrVIII_A_nidulans_FGSC_A4:4495378-4497825 | WT_5hasex | WT_veg | OK | 21,8452 | 77,0364 | 1,81822  | -3,70008 | 0,000215534 | 0,00212352  | yes |
| AN0141 | ChrVIII_A_nidulans_FGSC_A4:4472157-4473886 | WT_5hasex | WT_veg | OK | 6,49559 | 43,402  | 2,74023  | -4,43937 | 9,02218E-06 | 0,000131364 | yes |
| AN0142 | ChrVIII_A_nidulans_FGSC_A4:4470456-4471892 | WT_5hasex | WT_veg | OK | 63,9716 | 175,553 | 1,4564   | -2,98794 | 0,00280867  | 0,0184973   | yes |
| AN0159 | ChrVIII_A_nidulans_FGSC_A4:4415377-4418385 | WT_5hasex | WT_veg | OK | 27,4542 | 5,3969  | -2,34682 | 4,31565  | 1,59135E-05 | 0,000218699 | yes |
| AN0166 | ChrVIII_A_nidulans_FGSC_A4:4398520-4400860 | WT_5hasex | WT_veg | OK | 46,5301 | 130,734 | 1,49039  | -3,08685 | 0,0020229   | 0,0141075   | yes |
| AN0168 | ChrVIII_A_nidulans_FGSC_A4:4389598-4391884 | WT_5hasex | WT_veg | OK | 34,3498 | 150,528 | 2,13166  | -4,48595 | 7,25902E-06 | 0,000108372 | yes |
| AN0169 | ChrVIII_A_nidulans_FGSC_A4:4388862-4389376 | WT_5hasex | WT_veg | OK | 21,3046 | 67,1501 | 1,65623  | -2,6619  | 0,00777013  | 0,0425821   | yes |
| AN0190 | ChrVIII_A_nidulans_FGSC_A4:4332493-4333752 | WT_5hasex | WT_veg | OK | 31,6422 | 98,7533 | 1,64198  | -3,22339 | 0,00126683  | 0,00954217  | yes |
| AN0191 | ChrVIII_A_nidulans_FGSC_A4:4330732-4332028 | WT_5hasex | WT_veg | OK | 23,9158 | 75,6384 | 1,66116  | -3,14007 | 0,00168909  | 0,0121249   | yes |
| AN0192 | ChrVIII_A_nidulans_FGSC_A4:4329818-4330600 | WT_5hasex | WT_veg | OK | 51,3463 | 243,073 | 2,24306  | -4,29431 | 1,75236E-05 | 0,000238017 | yes |
| AN0201 | ChrVIII_A_nidulans_FGSC_A4:4308613-4310437 | WT_5hasex | WT_veg | OK | 17,2229 | 45,3373 | 1,39637  | -2,61188 | 0,00900458  | 0,0479921   | yes |
| AN0204 | ChrVIII_A_nidulans_FGSC_A4:4301514-4303917 | WT_5hasex | WT_veg | OK | 9,00422 | 51,9585 | 2,52869  | -4,49786 | 6,86408E-06 | 0,000102857 | yes |
| AN0212 | ChrVIII_A_nidulans_FGSC_A4:4280935-4281941 | WT_5hasex | WT_veg | OK | 33,6675 | 109,048 | 1,69554  | -3,1727  | 0,00151028  | 0,0110595   | yes |
| AN0225 | ChrVIII_A_nidulans_FGSC_A4:4230367-4235423 | WT_5hasex | WT_veg | OK | 23,1445 | 72,9605 | 1,65645  | -3,45502 | 0,000550262 | 0,0047278   | yes |
| AN0226 | ChrVIII_A_nidulans_FGSC_A4:4228256-4229177 | WT_5hasex | WT_veg | OK | 89,6508 | 293,139 | 1,7092   | -3,43358 | 0,000595668 | 0,00505657  | yes |
| AN0228 | ChrVIII_A_nidulans_FGSC_A4:4222215-4225138 | WT_5hasex | WT_veg | OK | 12,8247 | 43,6048 | 1,76556  | -3,47632 | 0,000508341 | 0,00441393  | yes |
| AN0234 | ChrVIII_A_nidulans_FGSC_A4:4203460-4204306 | WT_5hasex | WT_veg | OK | 84,2773 | 279,807 | 1,73122  | -3,5131  | 0,000442917 | 0,00392536  | yes |
| AN0235 | ChrVIII_A_nidulans_FGSC_A4:4199252-4202788 | WT_5hasex | WT_veg | OK | 40,1068 | 98,3653 | 1,2943   | -2,71175 | 0,00669282  | 0,0377928   | yes |
| AN0237 | ChrVIII_A_nidulans_FGSC_A4:4189862-4193486 | WT_5hasex | WT_veg | OK | 8,78513 | 36,9163 | 2,07112  | -3,95704 | 7,58828E-05 | 0,000862562 | yes |
| AN0247 | ChrVIII_A_nidulans_FGSC_A4:4149129-4152416 | WT_5hasex | WT_veg | OK | 10,6116 | 78,4419 | 2,88599  | -5,50311 | 3,73148E-08 | 9,53375E-07 | yes |
| AN0266 | ChrVIII_A_nidulans_FGSC_A4:4099285-4100921 | WT_5hasex | WT_veg | OK | 19,5038 | 52,1494 | 1,41889  | -2,72964 | 0,0063404   | 0,0361652   | yes |
| AN0282 | ChrVIII_A_nidulans_FGSC_A4:4044394-4045858 | WT_5hasex | WT_veg | OK | 32,7198 | 94,5121 | 1,53034  | -2,79029 | 0,00526609  | 0,0310025   | yes |
| AN0285 | ChrVIII_A_nidulans_FGSC_A4:4025978-4027015 | WT_5hasex | WT_veg | OK | 286,488 | 1491,17 | 2,37989  | -4,6183  | 3,86906E-06 | 6,14569E-05 | yes |
| AN0288 | ChrVIII_A_nidulans_FGSC_A4:4015251-4017084 | WT_5hasex | WT_veg | OK | 10,4511 | 45,6234 | 2,12612  | -3,73972 | 0,000184223 | 0,00185683  | yes |
| AN0299 | ChrVIII_A_nidulans_FGSC_A4:3981050-3982374 | WT_5hasex | WT_veg | OK | 65,8482 | 169,228 | 1,36175  | -2,80955 | 0,00496112  | 0,0295457   | yes |
| AN0301 | ChrVIII_A_nidulans_FGSC_A4:3976965-3978731 | WT_5hasex | WT_veg | OK | 12,7807 | 45,3334 | 1,8266   | -2,91797 | 0,00352316  | 0,022381    | yes |
| AN0303 | ChrVIII_A_nidulans_FGSC_A4:3969059-3970677 | WT_5hasex | WT_veg | OK | 55,2882 | 185,664 | 1,74765  | -3,63909 | 0,000273608 | 0,00260683  | yes |
| AN0305 | ChrVIII_A_nidulans_FGSC_A4:3962931-3966089 | WT_5hasex | WT_veg | OK | 10,7729 | 82,4003 | 2,93524  | -5,50384 | 3,71597E-08 | 9,50337E-07 | yes |
| AN0310 | ChrVIII_A_nidulans_FGSC_A4:3949555-3951547 | WT_5hasex | WT_veg | OK | 22,1435 | 123,315 | 2,4774   | -4,65667 | 3,21361E-06 | 5,23143E-05 | yes |
| AN0311 | ChrVIII_A_nidulans_FGSC_A4:3946543-3947810 | WT_5hasex | WT_veg | OK | 100,733 | 258,347 | 1,35877  | -2,77679 | 0,00548979  | 0,0320709   | yes |
| AN0312 | ChrVIII_A_nidulans_FGSC_A4:3943598-3945737 | WT_5hasex | WT_veg | OK | 5,51483 | 27,6181 | 2,32422  | -3,8186  | 0,000134212 | 0,00141851  | yes |
| AN0313 | ChrVIII_A_nidulans_FGSC_A4:3942168-3943182 | WT_5hasex | WT_veg | OK | 78,7692 | 313,648 | 1,99344  | -4,15311 | 3,27981E-05 | 0,000415041 | yes |
| AN0314 | ChrVIII_A_nidulans_FGSC_A4:3938171-3941353 | WT_5hasex | WT_veg | OK | 338,739 | 2309,73 | 2,76948  | -3,92574 | 8,64633E-05 | 0,000966891 | yes |
| AN0319 | ChrVIII_A_nidulans_FGSC_A4:3923088-3925485 | WT_5hasex | WT_veg | OK | 11,4261 | 45,9541 | 2,00786  | -3,47712 | 0,000506828 | 0,00440298  | yes |
| AN0321 | ChrVIII_A_nidulans_FGSC_A4:3901628-3905409 | WT_5hasex | WT_veg | OK | 11,981  | 35,6847 | 1,57455  | -3,14798 | 0,00164403  | 0,0118616   | yes |
| AN0323 | ChrVIII_A_nidulans_FGSC_A4:3898899-3899960 | WT_5hasex | WT_veg | OK | 60,6808 | 203,796 | 1,74781  | -3,46748 | 0,000525356 | 0,00453986  | yes |
| AN0325 | ChrVIII_A_nidulans_FGSC_A4:3890088-3894012 | WT_5hasex | WT_veg | OK | 23,6234 | 69,0918 | 1,5483   | -2,92514 | 0,00344301  | 0,021957    | yes |
| AN0326 | ChrVIII_A_nidulans_FGSC_A4:3890088-3894012 | WT_5hasex | WT_veg | OK | 14,0714 | 42,485  | 1,59419  | -2,97387 | 0,00294068  | 0,0192285   | yes |
| AN0328 | ChrVIII_A_nidulans_FGSC_A4:3886727-3888074 | WT_5hasex | WT_veg | OK | 43,7188 | 117,308 | 1,42397  | -2,91703 | 0,00353384  | 0,0224352   | yes |
| AN0329 | ChrVIII_A_nidulans_FGSC_A4:3883942-3886265 | WT_5hasex | WT_veg | OK | 57,3882 | 166,439 | 1,53617  | -3,1504  | 0,00163048  | 0,0117784   | yes |
| AN0330 | ChrVIII_A_nidulans_FGSC_A4:3882099-3883407 | WT_5hasex | WT_veg | OK | 48,9924 | 152,751 | 1,64055  | -3,19563 | 0,00139525  | 0,0103356   | yes |
| AN0334 | ChrVIII_A_nidulans_FGSC_A4:3872115-3874109 | WT_5hasex | WT_veg | OK | 63,4472 | 161,794 | 1,35053  | -2,78713 | 0,00531774  | 0,0312539   | yes |
| AN0337 | ChrVIII_A_nidulans_FGSC_A4:3865628-3866981 | WT_5hasex | WT_veg | OK | 21,06   | 284,7   | 3,75687  | -7,00248 | 2,51466E-12 | 1,31905E-10 | yes |
| AN0346 | ChrVIII_A_nidulans_FGSC_A4:3839847-3841103 | WT_5hasex | WT_veg | OK | 28,2992 | 131,193 | 2,21286  | -4,13952 | 3,48032E-05 | 0,000436723 | yes |
| AN0353 | ChrVIII_A_nidulans_FGSC_A4:3815815-3818095 | WT_5hasex | WT_veg | OK | 19,7507 | 81,7995 | 2,05019  | -4,08313 | 4,44322E-05 | 0,000540865 | yes |

## Supplementary table 2

|        |                                            |           |        |    |          |          |               |               |             |             |     |
|--------|--------------------------------------------|-----------|--------|----|----------|----------|---------------|---------------|-------------|-------------|-----|
| AN0366 | ChrVIII_A_nidulans_FGSC_A4:3775681-3776546 | WT_5hasex | WT_veg | OK | 17,9226  | 0        | -1.79769e+308 | -1.79769e+308 | 0,00594016  | 0,0342062   | yes |
| AN0400 | ChrVIII_A_nidulans_FGSC_A4:3676255-3676777 | WT_5hasex | WT_veg | OK | 135,747  | 1117,16  | 3,04084       | -5,97052      | 2,36497E-09 | 7,72144E-08 | yes |
| AN0403 | ChrVIII_A_nidulans_FGSC_A4:3669246-3670798 | WT_5hasex | WT_veg | OK | 14,2118  | 1,49696  | -3,24698      | 3,61827       | 0,000296583 | 0,00279474  | yes |
| AN0406 | ChrVIII_A_nidulans_FGSC_A4:3661136-3663393 | WT_5hasex | WT_veg | OK | 60,9767  | 199,746  | 1,71184       | -3,56915      | 0,000358143 | 0,00327301  | yes |
| AN0412 | ChrVIII_A_nidulans_FGSC_A4:3634663-3637647 | WT_5hasex | WT_veg | OK | 46,7685  | 170,867  | 1,86926       | -3,80333      | 0,000142765 | 0,00149091  | yes |
| AN0419 | ChrVIII_A_nidulans_FGSC_A4:3606055-3607057 | WT_5hasex | WT_veg | OK | 27,7931  | 92,0331  | 1,72743       | -2,84677      | 0,00441659  | 0,0269427   | yes |
| AN0421 | ChrVIII_A_nidulans_FGSC_A4:3601504-3604618 | WT_5hasex | WT_veg | OK | 15,853   | 193,232  | 3,60751       | -7,06297      | 1,62981E-12 | 8,80466E-11 | yes |
| AN0427 | ChrVIII_A_nidulans_FGSC_A4:3581983-3583208 | WT_5hasex | WT_veg | OK | 55,8119  | 431,18   | 2,94965       | -5,95478      | 2,60421E-09 | 8,43422E-08 | yes |
| AN0430 | ChrVIII_A_nidulans_FGSC_A4:3575731-3578524 | WT_5hasex | WT_veg | OK | 44,5768  | 142,793  | 1,67956       | -3,42378      | 0,000617573 | 0,00521548  | yes |
| AN0432 | ChrVIII_A_nidulans_FGSC_A4:3566598-3567965 | WT_5hasex | WT_veg | OK | 143,123  | 498,97   | 1,8017        | -3,70876      | 0,000208275 | 0,00206471  | yes |
| AN0435 | ChrVIII_A_nidulans_FGSC_A4:3560344-3561389 | WT_5hasex | WT_veg | OK | 8,41657  | 36,5205  | 2,1174        | -3,15166      | 0,00162346  | 0,011739    | yes |
| AN0441 | ChrVIII_A_nidulans_FGSC_A4:3543448-3545064 | WT_5hasex | WT_veg | OK | 8,60152  | 42,2174  | 2,29517       | -3,71477      | 0,00020339  | 0,00202355  | yes |
| AN0443 | ChrVIII_A_nidulans_FGSC_A4:3540038-3542056 | WT_5hasex | WT_veg | OK | 200,538  | 617,507  | 1,62258       | -3,20168      | 0,00136629  | 0,010157    | yes |
| AN0447 | ChrVIII_A_nidulans_FGSC_A4:3523007-3524202 | WT_5hasex | WT_veg | OK | 202,295  | 1039,2   | 2,36093       | -4,73832      | 2,15501E-06 | 3,67594E-05 | yes |
| AN0454 | ChrVIII_A_nidulans_FGSC_A4:3503738-3505709 | WT_5hasex | WT_veg | OK | 73,1788  | 248,128  | 1,76159       | -3,67119      | 0,000241427 | 0,00234239  | yes |
| AN0461 | ChrVIII_A_nidulans_FGSC_A4:3486754-3488163 | WT_5hasex | WT_veg | OK | 20,0058  | 183,773  | 3,19444       | -5,85192      | 4,85921E-09 | 1,49872E-07 | yes |
| AN0463 | ChrVIII_A_nidulans_FGSC_A4:3473688-3480087 | WT_5hasex | WT_veg | OK | 9,31472  | 27,4318  | 1,55826       | -3,08185      | 0,00205718  | 0,0143018   | yes |
| AN0467 | ChrVIII_A_nidulans_FGSC_A4:3467586-3468676 | WT_5hasex | WT_veg | OK | 625,405  | 4190,98  | 2,74443       | -4,89406      | 9,87754E-07 | 0,000018098 | yes |
| AN0468 | ChrVIII_A_nidulans_FGSC_A4:3465653-3467230 | WT_5hasex | WT_veg | OK | 922,867  | 4892,55  | 2,40639       | -3,40961      | 0,000650566 | 0,00544497  | yes |
| AN0475 | ChrVIII_A_nidulans_FGSC_A4:3440720-3443741 | WT_5hasex | WT_veg | OK | 13,2093  | 98,3796  | 2,8968        | -5,74547      | 9,16641E-09 | 2,67598E-07 | yes |
| AN0476 | ChrVIII_A_nidulans_FGSC_A4:3439620-3440482 | WT_5hasex | WT_veg | OK | 110,476  | 276,703  | 1,32461       | -2,6735       | 0,00750636  | 0,0414269   | yes |
| AN0480 | ChrVIII_A_nidulans_FGSC_A4:3428061-3429750 | WT_5hasex | WT_veg | OK | 32,2016  | 85,8559  | 1,41478       | -2,65096      | 0,00802645  | 0,0437216   | yes |
| AN0481 | ChrVIII_A_nidulans_FGSC_A4:3422774-3426907 | WT_5hasex | WT_veg | OK | 5,38253  | 18,1022  | 1,74981       | -2,951        | 0,0031675   | 0,0204514   | yes |
| AN0482 | ChrVIII_A_nidulans_FGSC_A4:3418485-3421943 | WT_5hasex | WT_veg | OK | 8,4762   | 34,8416  | 2,03932       | -3,86966      | 0,000108986 | 0,00118364  | yes |
| AN0490 | ChrVIII_A_nidulans_FGSC_A4:3392764-3395028 | WT_5hasex | WT_veg | OK | 101,776  | 282,243  | 1,47154       | -2,83808      | 0,00453865  | 0,0275335   | yes |
| AN0493 | ChrVIII_A_nidulans_FGSC_A4:3382781-3383500 | WT_5hasex | WT_veg | OK | 89,619   | 21,8907  | -2,03349      | 3,24985       | 0,00115467  | 0,00883908  | yes |
| AN0502 | ChrVIII_A_nidulans_FGSC_A4:3352591-3355320 | WT_5hasex | WT_veg | OK | 19,1902  | 48,3624  | 1,33351       | -2,62619      | 0,00863476  | 0,0463794   | yes |
| AN0506 | ChrVIII_A_nidulans_FGSC_A4:3343787-3344779 | WT_5hasex | WT_veg | OK | 12,8094  | 41,327   | 1,68988       | -2,82262      | 0,00476334  | 0,0286314   | yes |
| AN0512 | ChrVIII_A_nidulans_FGSC_A4:3321664-3322719 | WT_5hasex | WT_veg | OK | 1,16767  | 9,20691  | 2,97909       | -3,27412      | 0,00105991  | 0,00824055  | yes |
| AN0531 | ChrVIII_A_nidulans_FGSC_A4:3268048-3268535 | WT_5hasex | WT_veg | OK | 30,1217  | 3,79743  | -2,98771      | 2,92655       | 0,0034275   | 0,021874    | yes |
| AN0539 | ChrVIII_A_nidulans_FGSC_A4:3247158-3251399 | WT_5hasex | WT_veg | OK | 0,923409 | 16,8231  | 4,18733       | -5,2952       | 1,18887E-07 | 2,71574E-06 | yes |
| AN0557 | ChrVIII_A_nidulans_FGSC_A4:3176774-3180378 | WT_5hasex | WT_veg | OK | 62,9389  | 163,772  | 1,37966       | -2,78861      | 0,0052934   | 0,0311353   | yes |
| AN0566 | ChrVIII_A_nidulans_FGSC_A4:3148614-3151952 | WT_5hasex | WT_veg | OK | 21,2956  | 168,597  | 2,98495       | -5,95499      | 2,60089E-09 | 8,42868E-08 | yes |
| AN0572 | ChrVIII_A_nidulans_FGSC_A4:3132646-3134713 | WT_5hasex | WT_veg | OK | 2,6948   | 20,8911  | 2,95464       | -4,32688      | 1,51234E-05 | 0,000208607 | yes |
| AN0583 | ChrVIII_A_nidulans_FGSC_A4:3097636-3100523 | WT_5hasex | WT_veg | OK | 7,80146  | 58,472   | 2,90593       | -5,28688      | 1,24419E-07 | 2,82733E-06 | yes |
| AN0587 | ChrVIII_A_nidulans_FGSC_A4:3070633-3072703 | WT_5hasex | WT_veg | OK | 12,1554  | 0,935818 | -3,69923      | 3,9152        | 9,03308E-05 | 0,00100491  | yes |
| AN0589 | ChrVIII_A_nidulans_FGSC_A4:3063549-3066087 | WT_5hasex | WT_veg | OK | 8,3381   | 59,5824  | 2,8371        | -5,11343      | 3,16364E-07 | 6,59169E-06 | yes |
| AN0591 | ChrVIII_A_nidulans_FGSC_A4:3060919-3061756 | WT_5hasex | WT_veg | OK | 28,9748  | 80,5917  | 1,47583       | -2,68096      | 0,00734113  | 0,0406864   | yes |
| AN0599 | ChrVIII_A_nidulans_FGSC_A4:3032484-3033859 | WT_5hasex | WT_veg | OK | 14,1017  | 62,5218  | 2,14849       | -3,75027      | 0,000176646 | 0,00179253  | yes |
| AN0600 | ChrVIII_A_nidulans_FGSC_A4:3031138-3032055 | WT_5hasex | WT_veg | OK | 175,062  | 613,512  | 1,80922       | -3,64192      | 0,000270617 | 0,00258492  | yes |
| AN0601 | ChrVIII_A_nidulans_FGSC_A4:3028032-3029889 | WT_5hasex | WT_veg | OK | 23,2693  | 156,664  | 2,75117       | -5,51758      | 3,43694E-08 | 8,86333E-07 | yes |
| AN0609 | ChrVIII_A_nidulans_FGSC_A4:2994581-2996615 | WT_5hasex | WT_veg | OK | 13,7727  | 1,01079  | -3,76826      | 4,2338        | 0,000022977 | 0,000301463 | yes |
| AN0620 | ChrVIII_A_nidulans_FGSC_A4:2968350-2969543 | WT_5hasex | WT_veg | OK | 13,909   | 76,1439  | 2,45271       | -4,13788      | 3,50523E-05 | 0,000439429 | yes |
| AN0637 | ChrVIII_A_nidulans_FGSC_A4:2927088-2929650 | WT_5hasex | WT_veg | OK | 8,70645  | 34,3507  | 1,98018       | -3,61612      | 0,000299048 | 0,00281291  | yes |
| AN0644 | ChrVIII_A_nidulans_FGSC_A4:2910456-2912158 | WT_5hasex | WT_veg | OK | 111,694  | 510,266  | 2,1917        | -4,30359      | 0,000016805 | 0,000229566 | yes |
| AN0647 | ChrVIII_A_nidulans_FGSC_A4:2903522-2903957 | WT_5hasex | WT_veg | OK | 26,8226  | 165,878  | 2,6286        | -4,06334      | 0,000048376 | 0,000581956 | yes |

## Supplementary table 2

|        |                                            |           |        |    |         |         |          |          |             |             |     |
|--------|--------------------------------------------|-----------|--------|----|---------|---------|----------|----------|-------------|-------------|-----|
| AN0654 | ChrVIII_A_nidulans_FGSC_A4:2878590-2879983 | WT_5hasex | WT_veg | OK | 55,0023 | 181,702 | 1,72401  | -3,46045 | 0,000539282 | 0,00464031  | yes |
| AN0664 | ChrVIII_A_nidulans_FGSC_A4:2843545-2846971 | WT_5hasex | WT_veg | OK | 14,0808 | 44,1467 | 1,64858  | -3,19292 | 0,0014084   | 0,0104182   | yes |
| AN0666 | ChrVIII_A_nidulans_FGSC_A4:2839911-2841218 | WT_5hasex | WT_veg | OK | 2,54781 | 10,3035 | 2,01581  | -2,61003 | 0,00905338  | 0,048164    | yes |
| AN0691 | ChrVIII_A_nidulans_FGSC_A4:2777210-2777733 | WT_5hasex | WT_veg | OK | 7,30136 | 47,5352 | 2,70276  | -3,85377 | 0,000116313 | 0,00125387  | yes |
| AN0693 | ChrVIII_A_nidulans_FGSC_A4:2773753-2774363 | WT_5hasex | WT_veg | OK | 526,073 | 4465,47 | 3,08548  | -5,88166 | 4,06161E-09 | 1,27295E-07 | yes |
| AN0694 | ChrVIII_A_nidulans_FGSC_A4:2772139-2773030 | WT_5hasex | WT_veg | OK | 93,0768 | 1366,23 | 3,87564  | -7,91627 | 2,44249E-15 | 1,93633E-13 | yes |
| AN0695 | ChrVIII_A_nidulans_FGSC_A4:2770857-2771951 | WT_5hasex | WT_veg | OK | 130,223 | 733,173 | 2,49317  | -4,97524 | 6,51677E-07 | 1,25449E-05 | yes |
| AN0707 | ChrVIII_A_nidulans_FGSC_A4:2726984-2730491 | WT_5hasex | WT_veg | OK | 20,0129 | 72,0687 | 1,84844  | -3,82449 | 0,000131041 | 0,00139061  | yes |
| AN0709 | ChrVIII_A_nidulans_FGSC_A4:2717224-2720466 | WT_5hasex | WT_veg | OK | 483,417 | 2423,28 | 2,32562  | -3,08242 | 0,00205328  | 0,0142857   | yes |
| AN0714 | ChrVIII_A_nidulans_FGSC_A4:2694618-2695592 | WT_5hasex | WT_veg | OK | 15,1698 | 78,4379 | 2,37035  | -4,01422 | 0,000059643 | 0,000699197 | yes |
| AN0716 | ChrVIII_A_nidulans_FGSC_A4:2689719-2691346 | WT_5hasex | WT_veg | OK | 39,3429 | 102,93  | 1,38748  | -2,85237 | 0,00433948  | 0,0265403   | yes |
| AN0723 | ChrVIII_A_nidulans_FGSC_A4:2676065-2677290 | WT_5hasex | WT_veg | OK | 54,0524 | 297,586 | 2,46087  | -5,067   | 4,04137E-07 | 8,18575E-06 | yes |
| AN0727 | ChrVIII_A_nidulans_FGSC_A4:2646896-2648651 | WT_5hasex | WT_veg | OK | 15,1564 | 54,6392 | 1,85001  | -3,43349 | 0,000595855 | 0,00505733  | yes |
| AN0728 | ChrVIII_A_nidulans_FGSC_A4:2644618-2646661 | WT_5hasex | WT_veg | OK | 4,70896 | 46,3828 | 3,30011  | -5,28438 | 1,26135E-07 | 2,85887E-06 | yes |
| AN0732 | ChrVIII_A_nidulans_FGSC_A4:2633802-2636302 | WT_5hasex | WT_veg | OK | 106,055 | 463,432 | 2,12754  | -3,59841 | 0,000320165 | 0,00297839  | yes |
| AN0740 | ChrVIII_A_nidulans_FGSC_A4:2613728-2615290 | WT_5hasex | WT_veg | OK | 10,3836 | 37,0529 | 1,83528  | -3,07854 | 0,00208017  | 0,0144378   | yes |
| AN0745 | ChrVIII_A_nidulans_FGSC_A4:2596593-2598191 | WT_5hasex | WT_veg | OK | 144,838 | 587,815 | 2,02092  | -3,90085 | 9,58556E-05 | 0,00105659  | yes |
| AN0752 | ChrVIII_A_nidulans_FGSC_A4:2569278-2570481 | WT_5hasex | WT_veg | OK | 44,6402 | 168,978 | 1,92042  | -3,82187 | 0,000132444 | 0,00140322  | yes |
| AN0754 | ChrVIII_A_nidulans_FGSC_A4:2565702-2566698 | WT_5hasex | WT_veg | OK | 104,323 | 286,654 | 1,45825  | -3,04682 | 0,00231275  | 0,0157495   | yes |
| AN0757 | ChrVIII_A_nidulans_FGSC_A4:2557204-2560431 | WT_5hasex | WT_veg | OK | 28,9526 | 83,6981 | 1,5315   | -3,07202 | 0,00212618  | 0,0147006   | yes |
| AN0766 | ChrVIII_A_nidulans_FGSC_A4:2532772-2535188 | WT_5hasex | WT_veg | OK | 15,8487 | 59,0998 | 1,89879  | -3,76622 | 0,000165738 | 0,0016953   | yes |
| AN0777 | ChrVIII_A_nidulans_FGSC_A4:2498627-2500524 | WT_5hasex | WT_veg | OK | 22,7538 | 106,396 | 2,22526  | -4,38043 | 1,18443E-05 | 0,000166711 | yes |
| AN0789 | ChrVIII_A_nidulans_FGSC_A4:2464383-2467949 | WT_5hasex | WT_veg | OK | 138,44  | 647,016 | 2,22454  | -4,19245 | 2,75955E-05 | 0,000355646 | yes |
| AN0790 | ChrVIII_A_nidulans_FGSC_A4:2464383-2467949 | WT_5hasex | WT_veg | OK | 160,517 | 690,935 | 2,10583  | -3,99463 | 6,47964E-05 | 0,000751541 | yes |
| AN0791 | ChrVIII_A_nidulans_FGSC_A4:2463540-2464148 | WT_5hasex | WT_veg | OK | 249,44  | 2152,34 | 3,10914  | -6,24997 | 4,10523E-10 | 1,54764E-08 | yes |
| AN0796 | ChrVIII_A_nidulans_FGSC_A4:2454651-2455576 | WT_5hasex | WT_veg | OK | 10,1893 | 96,4726 | 3,24306  | -5,06553 | 4,07255E-07 | 8,23341E-06 | yes |
| AN0798 | ChrVIII_A_nidulans_FGSC_A4:2448562-2449638 | WT_5hasex | WT_veg | OK | 25,1667 | 82,9574 | 1,72085  | -3,05227 | 0,00227115  | 0,0155216   | yes |
| AN0805 | ChrVIII_A_nidulans_FGSC_A4:2429575-2430406 | WT_5hasex | WT_veg | OK | 5,82727 | 46,7534 | 3,00418  | -4,3028  | 1,68649E-05 | 0,000230265 | yes |
| AN0815 | ChrVIII_A_nidulans_FGSC_A4:2395679-2396581 | WT_5hasex | WT_veg | OK | 9,80269 | 35,053  | 1,83829  | -2,79504 | 0,00518933  | 0,0306367   | yes |
| AN0818 | ChrVIII_A_nidulans_FGSC_A4:2385109-2387450 | WT_5hasex | WT_veg | OK | 19,3071 | 54,7736 | 1,50435  | -2,98376 | 0,00284733  | 0,0187068   | yes |
| AN0819 | ChrVIII_A_nidulans_FGSC_A4:2383855-2384913 | WT_5hasex | WT_veg | OK | 386,884 | 1862,96 | 2,26762  | -4,36584 | 1,26637E-05 | 0,000177197 | yes |
| AN0820 | ChrVIII_A_nidulans_FGSC_A4:2380545-2381111 | WT_5hasex | WT_veg | OK | 274,686 | 90,5326 | -1,60127 | 2,84166  | 0,00448795  | 0,0272859   | yes |
| AN0823 | ChrVIII_A_nidulans_FGSC_A4:2364825-2366631 | WT_5hasex | WT_veg | OK | 57,8952 | 180,502 | 1,6405   | -3,29962 | 0,000968175 | 0,00763956  | yes |
| AN0831 | ChrVIII_A_nidulans_FGSC_A4:2343389-2345370 | WT_5hasex | WT_veg | OK | 140,684 | 395,777 | 1,49223  | -2,99327 | 0,00276008  | 0,0182342   | yes |
| AN0832 | ChrVIII_A_nidulans_FGSC_A4:2340882-2342967 | WT_5hasex | WT_veg | OK | 89,3783 | 282,733 | 1,66144  | -3,41981 | 0,000626647 | 0,00527899  | yes |
| AN0844 | ChrVIII_A_nidulans_FGSC_A4:2294739-2297209 | WT_5hasex | WT_veg | OK | 11,9159 | 73,0898 | 2,61678  | -4,9062  | 9,28602E-07 | 1,72128E-05 | yes |
| AN0859 | ChrVIII_A_nidulans_FGSC_A4:2251416-2252421 | WT_5hasex | WT_veg | OK | 61,4261 | 154,744 | 1,33296  | -2,76449 | 0,00570111  | 0,0331098   | yes |
| AN0860 | ChrVIII_A_nidulans_FGSC_A4:2247362-2249672 | WT_5hasex | WT_veg | OK | 1088,98 | 5656,49 | 2,37693  | -2,68324 | 0,0072912   | 0,040461    | yes |
| AN0866 | ChrVIII_A_nidulans_FGSC_A4:2229876-2232313 | WT_5hasex | WT_veg | OK | 14,3826 | 39,7709 | 1,46738  | -2,79223 | 0,00523456  | 0,0308586   | yes |
| AN0871 | ChrVIII_A_nidulans_FGSC_A4:2213476-2214744 | WT_5hasex | WT_veg | OK | 63,5267 | 180,566 | 1,50709  | -3,14551 | 0,00165799  | 0,0119376   | yes |
| AN0894 | ChrVIII_A_nidulans_FGSC_A4:2139637-2142035 | WT_5hasex | WT_veg | OK | 29,9809 | 199,249 | 2,73246  | -5,53323 | 3,14381E-08 | 8,17579E-07 | yes |
| AN0898 | ChrVIII_A_nidulans_FGSC_A4:2132226-2134170 | WT_5hasex | WT_veg | OK | 112,628 | 291,2   | 1,37045  | -2,8474  | 0,00440774  | 0,0268981   | yes |
| AN0926 | ChrVIII_A_nidulans_FGSC_A4:2053676-2056857 | WT_5hasex | WT_veg | OK | 15,2928 | 42,3984 | 1,47115  | -2,94963 | 0,0031815   | 0,0205291   | yes |
| AN0930 | ChrVIII_A_nidulans_FGSC_A4:2035850-2037872 | WT_5hasex | WT_veg | OK | 110,838 | 715,684 | 2,69087  | -5,14166 | 2,72323E-07 | 5,74718E-06 | yes |
| AN0938 | ChrVIII_A_nidulans_FGSC_A4:2011890-2014333 | WT_5hasex | WT_veg | OK | 15,7668 | 71,9651 | 2,19041  | -3,95471 | 7,66281E-05 | 0,000869713 | yes |
| AN0939 | ChrVIII_A_nidulans_FGSC_A4:2010938-2011688 | WT_5hasex | WT_veg | OK | 18,3579 | 111,157 | 2,59813  | -4,27583 | 1,90426E-05 | 0,000255406 | yes |

## Supplementary table 2

|         |                                            |           |        |    |          |         |          |          |             |             |     |
|---------|--------------------------------------------|-----------|--------|----|----------|---------|----------|----------|-------------|-------------|-----|
| AN0944  | ChrVIII_A_nidulans_FGSC_A4:1998304-2000533 | WT_5hasex | WT_veg | OK | 9,63239  | 38,7354 | 2,00769  | -3,59708 | 0,000321805 | 0,00298887  | yes |
| AN0946  | ChrVIII_A_nidulans_FGSC_A4:1992044-1994369 | WT_5hasex | WT_veg | OK | 15,5568  | 139,771 | 3,16744  | -5,94709 | 2,72951E-09 | 8,82914E-08 | yes |
| AN0948  | ChrVIII_A_nidulans_FGSC_A4:1982294-1985047 | WT_5hasex | WT_veg | OK | 12,8694  | 162,573 | 3,65907  | -6,69066 | 2,22165E-11 | 9,95882E-10 | yes |
| AN0950  | ChrVIII_A_nidulans_FGSC_A4:1978777-1979508 | WT_5hasex | WT_veg | OK | 120,251  | 18,6545 | -2,68845 | 5,06302  | 4,12665E-07 | 8,32991E-06 | yes |
| AN0952  | ChrVIII_A_nidulans_FGSC_A4:1962952-1965250 | WT_5hasex | WT_veg | OK | 100,177  | 244,38  | 1,28657  | -2,62996 | 0,00853959  | 0,0459581   | yes |
| AN0956  | ChrVIII_A_nidulans_FGSC_A4:1953253-1955139 | WT_5hasex | WT_veg | OK | 7,47898  | 33,9955 | 2,18443  | -3,62424 | 0,000289811 | 0,00273979  | yes |
| AN0964  | ChrVIII_A_nidulans_FGSC_A4:1941664-1942477 | WT_5hasex | WT_veg | OK | 147,296  | 451,984 | 1,61755  | -2,60825 | 0,00910075  | 0,0483473   | yes |
| AN0981  | ChrVIII_A_nidulans_FGSC_A4:1891076-1892734 | WT_5hasex | WT_veg | OK | 99,2306  | 469,667 | 2,24278  | -4,43358 | 9,26809E-06 | 0,000134496 | yes |
| AN0988  | ChrVIII_A_nidulans_FGSC_A4:1871865-1874363 | WT_5hasex | WT_veg | OK | 47,3763  | 224,677 | 2,24561  | -4,63475 | 3,57361E-06 | 5,73726E-05 | yes |
| AN0997  | ChrVIII_A_nidulans_FGSC_A4:1845534-1846989 | WT_5hasex | WT_veg | OK | 58,1774  | 158,935 | 1,44991  | -2,9544  | 0,00313278  | 0,0202698   | yes |
| AN1000  | ChrVIII_A_nidulans_FGSC_A4:1840304-1841120 | WT_5hasex | WT_veg | OK | 13,1693  | 45,5413 | 1,79     | -2,8997  | 0,0037352   | 0,0234634   | yes |
| AN10014 | ChrVIII_A_nidulans_FGSC_A4:4730247-4730955 | WT_5hasex | WT_veg | OK | 14,6057  | 68,3149 | 2,22567  | -3,46063 | 0,000538918 | 0,00463794  | yes |
| AN10019 | ChrVIII_A_nidulans_FGSC_A4:4557093-4560757 | WT_5hasex | WT_veg | OK | 34,6593  | 91,6505 | 1,4029   | -2,96119 | 0,00306452  | 0,0198894   | yes |
| AN10024 | ChrVIII_A_nidulans_FGSC_A4:4425847-4427318 | WT_5hasex | WT_veg | OK | 2,96134  | 14,261  | 2,26776  | -3,21585 | 0,0013006   | 0,00975583  | yes |
| AN10025 | ChrVIII_A_nidulans_FGSC_A4:4369686-4370756 | WT_5hasex | WT_veg | OK | 6,24255  | 49,5521 | 2,98874  | -4,54851 | 5,40277E-06 | 8,29279E-05 | yes |
| AN10031 | ChrVIII_A_nidulans_FGSC_A4:4093005-4094318 | WT_5hasex | WT_veg | OK | 193,852  | 675,843 | 1,80173  | -3,63004 | 0,000283379 | 0,00268835  | yes |
| AN10034 | ChrVIII_A_nidulans_FGSC_A4:4312450-4313104 | WT_5hasex | WT_veg | OK | 76,3736  | 485,23  | 2,66752  | -5,31762 | 1,05136E-07 | 2,43453E-06 | yes |
| AN10039 | ChrVIII_A_nidulans_FGSC_A4:4460858-4462628 | WT_5hasex | WT_veg | OK | 3,54792  | 88,0903 | 4,63394  | -6,84799 | 7,48934E-12 | 3,66098E-10 | yes |
| AN10047 | ChrVIII_A_nidulans_FGSC_A4:4071742-4073355 | WT_5hasex | WT_veg | OK | 0,554272 | 6,31193 | 3,50941  | -4,12339 | 3,73337E-05 | 0,000464584 | yes |
| AN10052 | ChrVIII_A_nidulans_FGSC_A4:3952397-3953507 | WT_5hasex | WT_veg | OK | 24,4204  | 182,424 | 2,90114  | -5,31874 | 1,04488E-07 | 2,42381E-06 | yes |
| AN10055 | ChrVIII_A_nidulans_FGSC_A4:3842920-3844204 | WT_5hasex | WT_veg | OK | 49,463   | 256,896 | 2,37676  | -4,68424 | 2,80996E-06 | 4,63625E-05 | yes |
| AN10057 | ChrVIII_A_nidulans_FGSC_A4:3797354-3801144 | WT_5hasex | WT_veg | OK | 7,94006  | 50,7963 | 2,6775   | -4,1641  | 3,12579E-05 | 0,000397567 | yes |
| AN10058 | ChrVIII_A_nidulans_FGSC_A4:3789789-3791467 | WT_5hasex | WT_veg | OK | 15,159   | 61,2308 | 2,01408  | -3,64096 | 0,000271618 | 0,00259354  | yes |
| AN10060 | ChrVIII_A_nidulans_FGSC_A4:3822671-3827536 | WT_5hasex | WT_veg | OK | 81,6633  | 354,297 | 2,1172   | -3,37195 | 0,000746378 | 0,00611502  | yes |
| AN10068 | ChrVIII_A_nidulans_FGSC_A4:3792159-3794565 | WT_5hasex | WT_veg | OK | 13,7312  | 39,0247 | 1,50692  | -2,90449 | 0,00367851  | 0,0231935   | yes |
| AN10096 | ChrVIII_A_nidulans_FGSC_A4:3351371-3352228 | WT_5hasex | WT_veg | OK | 44,8945  | 258,478 | 2,52543  | -4,94957 | 7,43758E-07 | 0,000014116 | yes |
| AN10103 | ChrVIII_A_nidulans_FGSC_A4:3569135-3570516 | WT_5hasex | WT_veg | OK | 147,599  | 458,665 | 1,63575  | -3,37553 | 0,000736727 | 0,0060492   | yes |
| AN10108 | ChrVIII_A_nidulans_FGSC_A4:2811337-2812133 | WT_5hasex | WT_veg | OK | 32,4851  | 96,3573 | 1,56862  | -2,91447 | 0,00356287  | 0,0225703   | yes |
| AN10124 | ChrVIII_A_nidulans_FGSC_A4:2403710-2405414 | WT_5hasex | WT_veg | OK | 44,3279  | 123,593 | 1,47931  | -3,00499 | 0,00265586  | 0,0176579   | yes |
| AN10125 | ChrVIII_A_nidulans_FGSC_A4:2314857-2317630 | WT_5hasex | WT_veg | OK | 15,6462  | 106,77  | 2,77063  | -5,49488 | 3,90977E-08 | 9,94561E-07 | yes |
| AN10132 | ChrVIII_A_nidulans_FGSC_A4:2132226-2134170 | WT_5hasex | WT_veg | OK | 43,2288  | 118,856 | 1,45916  | -2,66446 | 0,00771118  | 0,0423255   | yes |
| AN10135 | ChrVIII_A_nidulans_FGSC_A4:1997179-1998276 | WT_5hasex | WT_veg | OK | 77,0316  | 290,156 | 1,91331  | -3,55924 | 0,000371932 | 0,00337722  | yes |
| AN10161 | ChrVIII_A_nidulans_FGSC_A4:1596025-1596720 | WT_5hasex | WT_veg | OK | 82,4149  | 325,776 | 1,9829   | -3,89404 | 9,85877E-05 | 0,00108261  | yes |
| AN10164 | ChrVIII_A_nidulans_FGSC_A4:1549490-1551848 | WT_5hasex | WT_veg | OK | 41,55    | 125,293 | 1,59239  | -3,23127 | 0,0012324   | 0,00932703  | yes |
| AN10168 | ChrVIII_A_nidulans_FGSC_A4:1113350-1114485 | WT_5hasex | WT_veg | OK | 123,018  | 414,436 | 1,75228  | -3,54359 | 0,000394715 | 0,00355515  | yes |
| AN10169 | ChrVIII_A_nidulans_FGSC_A4:1013031-1013975 | WT_5hasex | WT_veg | OK | 10,6043  | 38,0441 | 1,84302  | -2,818   | 0,00483231  | 0,0289431   | yes |
| AN10173 | ChrVIII_A_nidulans_FGSC_A4:1114703-1116975 | WT_5hasex | WT_veg | OK | 19,4229  | 132,576 | 2,77099  | -5,36235 | 8,21469E-08 | 0,000001954 | yes |
| AN10174 | ChrVIII_A_nidulans_FGSC_A4:1012072-1012845 | WT_5hasex | WT_veg | OK | 213,839  | 945,979 | 2,14528  | -4,44125 | 8,94396E-06 | 0,000130298 | yes |
| AN10185 | ChrVIII_A_nidulans_FGSC_A4:665010-666686   | WT_5hasex | WT_veg | OK | 46,7649  | 154,893 | 1,72777  | -3,58781 | 0,000333463 | 0,0030786   | yes |
| AN10190 | ChrVII_A_nidulans_FGSC_A4:699955-701557    | WT_5hasex | WT_veg | OK | 46,1147  | 131,25  | 1,50902  | -3,13419 | 0,00172329  | 0,0123349   | yes |
| AN10194 | ChrVII_A_nidulans_FGSC_A4:908122-914923    | WT_5hasex | WT_veg | OK | 23,54    | 58,7588 | 1,31969  | -2,72707 | 0,00639002  | 0,0363888   | yes |
| AN10197 | ChrVII_A_nidulans_FGSC_A4:863758-865169    | WT_5hasex | WT_veg | OK | 29,8862  | 122,967 | 2,04071  | -3,80559 | 0,000141467 | 0,00147966  | yes |
| AN1020  | ChrVIII_A_nidulans_FGSC_A4:1779034-1779568 | WT_5hasex | WT_veg | OK | 91,6663  | 338,87  | 1,88627  | -3,51824 | 0,000434423 | 0,00385906  | yes |
| AN10200 | ChrVII_A_nidulans_FGSC_A4:927321-928443    | WT_5hasex | WT_veg | OK | 42,6099  | 310,347 | 2,86462  | -5,5992  | 2,15346E-08 | 5,80183E-07 | yes |
| AN10202 | ChrVII_A_nidulans_FGSC_A4:681184-683748    | WT_5hasex | WT_veg | OK | 474,124  | 1587,76 | 1,74366  | -2,85608 | 0,00428906  | 0,0262741   | yes |
| AN1021  | ChrVIII_A_nidulans_FGSC_A4:1777377-1778661 | WT_5hasex | WT_veg | OK | 71,1472  | 244,185 | 1,7791   | -3,71196 | 0,000205659 | 0,00204302  | yes |

## Supplementary table 2

|         |                                            |           |        |    |          |         |          |          |             |             |     |
|---------|--------------------------------------------|-----------|--------|----|----------|---------|----------|----------|-------------|-------------|-----|
| AN10210 | ChrVII_A_nidulans_FGSC_A4:1019572-1021666  | WT_5hasex | WT_veg | OK | 5,81573  | 22,8606 | 1,97483  | -2,6705  | 0,00757383  | 0,0417521   | yes |
| AN10211 | ChrVII_A_nidulans_FGSC_A4:969316-970602    | WT_5hasex | WT_veg | OK | 16,3721  | 70,7946 | 2,1124   | -3,81519 | 0,00013608  | 0,00143565  | yes |
| AN10213 | ChrVII_A_nidulans_FGSC_A4:1027687-1029364  | WT_5hasex | WT_veg | OK | 9,64174  | 47,9361 | 2,31375  | -3,89973 | 0,000096299 | 0,0010604   | yes |
| AN10217 | ChrVII_A_nidulans_FGSC_A4:1203939-1205039  | WT_5hasex | WT_veg | OK | 97,991   | 35,8371 | -1,4512  | 2,91976  | 0,00350303  | 0,0222777   | yes |
| AN10218 | ChrVII_A_nidulans_FGSC_A4:1205543-1207100  | WT_5hasex | WT_veg | OK | 27,521   | 78,2813 | 1,50813  | -3,00748 | 0,0026342   | 0,0175531   | yes |
| AN10219 | ChrVII_A_nidulans_FGSC_A4:1162583-1163411  | WT_5hasex | WT_veg | OK | 916,624  | 4416,73 | 2,26858  | -3,84892 | 0,000118641 | 0,00127503  | yes |
| AN1022  | ChrVIII_A_nidulans_FGSC_A4:1775719-1776961 | WT_5hasex | WT_veg | OK | 191,064  | 652,231 | 1,77133  | -3,54302 | 0,000395572 | 0,00356226  | yes |
| AN10224 | ChrVII_A_nidulans_FGSC_A4:1417749-1418316  | WT_5hasex | WT_veg | OK | 8,30172  | 44,0346 | 2,40716  | -3,38235 | 0,000718679 | 0,00592701  | yes |
| AN10228 | ChrVII_A_nidulans_FGSC_A4:1726808-1729543  | WT_5hasex | WT_veg | OK | 18,6619  | 84,3783 | 2,17678  | -4,41396 | 1,01495E-05 | 0,000145888 | yes |
| AN10232 | ChrVII_A_nidulans_FGSC_A4:1731347-1732906  | WT_5hasex | WT_veg | OK | 7,31327  | 42,006  | 2,52201  | -4,08716 | 4,36695E-05 | 0,000532551 | yes |
| AN10233 | ChrVII_A_nidulans_FGSC_A4:1747453-1748998  | WT_5hasex | WT_veg | OK | 15,8306  | 46,9186 | 1,56744  | -2,69601 | 0,00701763  | 0,0392045   | yes |
| AN10234 | ChrVII_A_nidulans_FGSC_A4:2027418-2028466  | WT_5hasex | WT_veg | OK | 10,6748  | 38,1248 | 1,83652  | -2,7346  | 0,0062456   | 0,0356983   | yes |
| AN10237 | ChrVII_A_nidulans_FGSC_A4:2438326-2439510  | WT_5hasex | WT_veg | OK | 243,055  | 885,756 | 1,86563  | -3,72156 | 0,000197999 | 0,00197554  | yes |
| AN1024  | ChrVIII_A_nidulans_FGSC_A4:1771000-1773782 | WT_5hasex | WT_veg | OK | 10,0617  | 35,4532 | 1,81704  | -3,42795 | 0,000608155 | 0,00514744  | yes |
| AN10248 | ChrVII_A_nidulans_FGSC_A4:2466932-2467877  | WT_5hasex | WT_veg | OK | 31,9111  | 122,092 | 1,93584  | -3,64045 | 0,00027216  | 0,00259683  | yes |
| AN10249 | ChrVII_A_nidulans_FGSC_A4:2483924-2484621  | WT_5hasex | WT_veg | OK | 29,8607  | 83,4998 | 1,48353  | -2,60099 | 0,00929548  | 0,0491426   | yes |
| AN10251 | ChrVII_A_nidulans_FGSC_A4:2511794-2513380  | WT_5hasex | WT_veg | OK | 20,277   | 55,0786 | 1,44165  | -2,75782 | 0,00581875  | 0,0336679   | yes |
| AN10260 | ChrVII_A_nidulans_FGSC_A4:2831604-2832568  | WT_5hasex | WT_veg | OK | 112,096  | 967,556 | 3,10961  | -6,39612 | 1,59379E-10 | 6,37541E-09 | yes |
| AN10262 | ChrVII_A_nidulans_FGSC_A4:2944635-2946340  | WT_5hasex | WT_veg | OK | 34,9099  | 111,891 | 1,68039  | -3,38521 | 0,000711235 | 0,00587209  | yes |
| AN10264 | ChrVII_A_nidulans_FGSC_A4:2847562-2848378  | WT_5hasex | WT_veg | OK | 107,725  | 492,87  | 2,19385  | -4,50807 | 6,54185E-06 | 9,84226E-05 | yes |
| AN10265 | ChrVII_A_nidulans_FGSC_A4:3066459-3068251  | WT_5hasex | WT_veg | OK | 40,9823  | 103,842 | 1,34132  | -2,75775 | 0,00582007  | 0,03367     | yes |
| AN10267 | ChrVII_A_nidulans_FGSC_A4:3117233-3119137  | WT_5hasex | WT_veg | OK | 24,6891  | 85,1931 | 1,78686  | -3,55756 | 0,000374322 | 0,00339609  | yes |
| AN10272 | ChrVII_A_nidulans_FGSC_A4:3128958-3129355  | WT_5hasex | WT_veg | OK | 30,1027  | 136,603 | 2,18203  | -3,50307 | 0,000459928 | 0,00405402  | yes |
| AN10285 | ChrVII_A_nidulans_FGSC_A4:3514268-3518663  | WT_5hasex | WT_veg | OK | 308,617  | 1200,73 | 1,96002  | -2,91694 | 0,00353487  | 0,0224363   | yes |
| AN10288 | ChrVII_A_nidulans_FGSC_A4:3614200-3615317  | WT_5hasex | WT_veg | OK | 9,50989  | 81,1912 | 3,09382  | -4,98812 | 6,09711E-07 | 1,18246E-05 | yes |
| AN10296 | ChrVII_A_nidulans_FGSC_A4:3671440-3673028  | WT_5hasex | WT_veg | OK | 996,369  | 220,621 | -2,17511 | 3,28146  | 0,00103271  | 0,00806979  | yes |
| AN10303 | ChrVII_A_nidulans_FGSC_A4:3926125-3927658  | WT_5hasex | WT_veg | OK | 85,7093  | 477,76  | 2,47876  | -5,14239 | 2,71269E-07 | 5,72957E-06 | yes |
| AN10316 | ChrVII_A_nidulans_FGSC_A4:4193344-4197753  | WT_5hasex | WT_veg | OK | 9,88221  | 28,142  | 1,50982  | -3,04536 | 0,00232399  | 0,0158138   | yes |
| AN10327 | ChrVII_A_nidulans_FGSC_A4:4421540-4422939  | WT_5hasex | WT_veg | OK | 52,4517  | 217,41  | 2,05136  | -4,03371 | 5,49042E-05 | 0,000649606 | yes |
| AN10336 | ChrVI_A_nidulans_FGSC_A4:2892986-2894515   | WT_5hasex | WT_veg | OK | 49,1345  | 164,213 | 1,74076  | -3,60969 | 0,000306565 | 0,00287382  | yes |
| AN10340 | ChrVI_A_nidulans_FGSC_A4:2864837-2866489   | WT_5hasex | WT_veg | OK | 42,467   | 179,884 | 2,08265  | -4,29937 | 1,71284E-05 | 0,000233315 | yes |
| AN10341 | ChrVI_A_nidulans_FGSC_A4:2960205-2965474   | WT_5hasex | WT_veg | OK | 10,5388  | 28,721  | 1,4464   | -2,77507 | 0,00551901  | 0,0322165   | yes |
| AN10349 | ChrVI_A_nidulans_FGSC_A4:2357613-2359270   | WT_5hasex | WT_veg | OK | 32,5986  | 89,4992 | 1,45707  | -2,94392 | 0,00324079  | 0,0208399   | yes |
| AN10350 | ChrVI_A_nidulans_FGSC_A4:2303666-2306927   | WT_5hasex | WT_veg | OK | 125,892  | 686,285 | 2,44663  | -4,62028 | 3,83225E-06 | 6,09462E-05 | yes |
| AN10352 | ChrVI_A_nidulans_FGSC_A4:1946667-1948618   | WT_5hasex | WT_veg | OK | 99,9624  | 517,906 | 2,37323  | -4,57379 | 4,78974E-06 | 7,44122E-05 | yes |
| AN10356 | ChrVI_A_nidulans_FGSC_A4:1711425-1713182   | WT_5hasex | WT_veg | OK | 375,941  | 1484,34 | 1,98124  | -3,35941 | 0,00078109  | 0,00636063  | yes |
| AN10358 | ChrVI_A_nidulans_FGSC_A4:2678089-2679366   | WT_5hasex | WT_veg | OK | 0,722725 | 7,61328 | 3,397    | -3,29985 | 0,000967373 | 0,00763567  | yes |
| AN10368 | ChrVI_A_nidulans_FGSC_A4:2644749-2645236   | WT_5hasex | WT_veg | OK | 44,2032  | 319,565 | 2,85389  | -4,80347 | 1,55938E-06 | 2,74764E-05 | yes |
| AN10370 | ChrVI_A_nidulans_FGSC_A4:2239730-2241306   | WT_5hasex | WT_veg | OK | 158,928  | 640,762 | 2,01142  | -3,89539 | 9,80397E-05 | 0,00107681  | yes |
| AN10371 | ChrVI_A_nidulans_FGSC_A4:2250046-2250525   | WT_5hasex | WT_veg | OK | 111,159  | 896,429 | 3,01156  | -5,65509 | 1,55765E-08 | 4,31644E-07 | yes |
| AN10374 | ChrVI_A_nidulans_FGSC_A4:2356975-2357350   | WT_5hasex | WT_veg | OK | 105,828  | 325,889 | 1,62266  | -3,03406 | 0,00241285  | 0,0163315   | yes |
| AN10377 | ChrVI_A_nidulans_FGSC_A4:1739018-1740690   | WT_5hasex | WT_veg | OK | 64,4539  | 392,825 | 2,60755  | -5,41232 | 6,22138E-08 | 1,52271E-06 | yes |
| AN10379 | ChrVI_A_nidulans_FGSC_A4:1524782-1526142   | WT_5hasex | WT_veg | OK | 35,8139  | 109,589 | 1,61352  | -3,14105 | 0,00168341  | 0,0120924   | yes |
| AN10381 | ChrVI_A_nidulans_FGSC_A4:1526199-1527621   | WT_5hasex | WT_veg | OK | 16,0368  | 4,08821 | -1,97184 | 3,08953  | 0,00200477  | 0,0139941   | yes |
| AN1039  | ChrVIII_A_nidulans_FGSC_A4:1707150-1711498 | WT_5hasex | WT_veg | OK | 19,1967  | 54,8743 | 1,51527  | -3,09696 | 0,00195517  | 0,01371     | yes |
| AN10391 | ChrVI_A_nidulans_FGSC_A4:1125597-1127513   | WT_5hasex | WT_veg | OK | 5,39487  | 30,1176 | 2,48095  | -3,64862 | 0,000263652 | 0,00253087  | yes |

## Supplementary table 2

|         |                                            |           |        |    |          |         |          |          |             |             |     |
|---------|--------------------------------------------|-----------|--------|----|----------|---------|----------|----------|-------------|-------------|-----|
| AN10397 | ChrVI_A_nidulans_FGSC_A4:1123911-1125003   | WT_5hasex | WT_veg | OK | 4,10829  | 21,3119 | 2,37505  | -3,03284 | 0,00242264  | 0,0163872   | yes |
| AN10398 | ChrVI_A_nidulans_FGSC_A4:1119809-1121372   | WT_5hasex | WT_veg | OK | 6,46688  | 53,9789 | 3,06125  | -4,22577 | 2,38127E-05 | 0,000311181 | yes |
| AN10399 | ChrVI_A_nidulans_FGSC_A4:1002818-1004140   | WT_5hasex | WT_veg | OK | 186,66   | 713,681 | 1,93487  | -3,4908  | 0,000481585 | 0,00421232  | yes |
| AN10408 | ChrVI_A_nidulans_FGSC_A4:757929-759166     | WT_5hasex | WT_veg | OK | 24,7327  | 66,8754 | 1,43505  | -2,70324 | 0,00686679  | 0,0385485   | yes |
| AN10409 | ChrVI_A_nidulans_FGSC_A4:753603-755951     | WT_5hasex | WT_veg | OK | 29,1346  | 100,345 | 1,78416  | -3,70001 | 0,000215587 | 0,00212353  | yes |
| AN10410 | ChrVI_A_nidulans_FGSC_A4:712878-714337     | WT_5hasex | WT_veg | OK | 3,67356  | 15,4964 | 2,07668  | -2,95866 | 0,00308977  | 0,0200334   | yes |
| AN10417 | ChrVI_A_nidulans_FGSC_A4:645101-646908     | WT_5hasex | WT_veg | OK | 17,5614  | 64,2695 | 1,87173  | -3,56204 | 0,00036799  | 0,00334665  | yes |
| AN10421 | ChrII_A_nidulans_FGSC_A4:3940539-3941836   | WT_5hasex | WT_veg | OK | 21,2037  | 90,5912 | 2,09506  | -3,70151 | 0,000214316 | 0,00211419  | yes |
| AN10422 | ChrII_A_nidulans_FGSC_A4:3939512-3940018   | WT_5hasex | WT_veg | OK | 154,399  | 549,762 | 1,83214  | -3,54228 | 0,00039668  | 0,00356856  | yes |
| AN10424 | ChrII_A_nidulans_FGSC_A4:3881258-3883368   | WT_5hasex | WT_veg | OK | 16,8056  | 101,889 | 2,59998  | -4,14296 | 3,42855E-05 | 0,000431156 | yes |
| AN10426 | ChrII_A_nidulans_FGSC_A4:3883472-3885170   | WT_5hasex | WT_veg | OK | 9,86736  | 56,5632 | 2,51913  | -3,63031 | 0,000283084 | 0,00268638  | yes |
| AN10436 | ChrII_A_nidulans_FGSC_A4:3389836-3391695   | WT_5hasex | WT_veg | OK | 42,8561  | 128,677 | 1,58619  | -3,27399 | 0,00106042  | 0,00824207  | yes |
| AN10438 | ChrII_A_nidulans_FGSC_A4:3323260-3325257   | WT_5hasex | WT_veg | OK | 10,55    | 73,1995 | 2,79459  | -5,03123 | 4,8734E-07  | 9,6514E-06  | yes |
| AN10441 | ChrII_A_nidulans_FGSC_A4:3272278-3274568   | WT_5hasex | WT_veg | OK | 17,2423  | 67,3577 | 1,96589  | -3,81308 | 0,000137245 | 0,00144416  | yes |
| AN10449 | ChrII_A_nidulans_FGSC_A4:3498937-3500689   | WT_5hasex | WT_veg | OK | 55,0212  | 164,482 | 1,57987  | -3,25812 | 0,00112151  | 0,00863748  | yes |
| AN1045  | ChrVIII_A_nidulans_FGSC_A4:1690400-1692003 | WT_5hasex | WT_veg | OK | 37,5     | 91,9149 | 1,29341  | -2,61115 | 0,00902384  | 0,0480458   | yes |
| AN10451 | ChrII_A_nidulans_FGSC_A4:3465706-3466919   | WT_5hasex | WT_veg | OK | 18,5     | 85,2515 | 2,2042   | -3,89978 | 9,62788E-05 | 0,0010604   | yes |
| AN10452 | ChrII_A_nidulans_FGSC_A4:3458466-3459675   | WT_5hasex | WT_veg | OK | 89,8257  | 331,873 | 1,88543  | -3,93939 | 8,16877E-05 | 0,000918387 | yes |
| AN10456 | ChrII_A_nidulans_FGSC_A4:3159268-3161091   | WT_5hasex | WT_veg | OK | 126,431  | 332,049 | 1,39305  | -2,86718 | 0,00414148  | 0,025514    | yes |
| AN10462 | ChrII_A_nidulans_FGSC_A4:3195698-3197156   | WT_5hasex | WT_veg | OK | 21,9982  | 75,7684 | 1,78421  | -3,33039 | 0,000867255 | 0,00696702  | yes |
| AN10466 | ChrII_A_nidulans_FGSC_A4:3274853-3276353   | WT_5hasex | WT_veg | OK | 89,76    | 255,051 | 1,50664  | -3,14761 | 0,00164612  | 0,0118691   | yes |
| AN10468 | ChrII_A_nidulans_FGSC_A4:3099487-3101271   | WT_5hasex | WT_veg | OK | 10,8536  | 45,4495 | 2,06609  | -3,43032 | 0,00060286  | 0,00510687  | yes |
| AN10469 | ChrII_A_nidulans_FGSC_A4:2878490-2879463   | WT_5hasex | WT_veg | OK | 153,603  | 471,47  | 1,61796  | -3,23017 | 0,00123717  | 0,009355    | yes |
| AN10473 | ChrII_A_nidulans_FGSC_A4:2855581-2856542   | WT_5hasex | WT_veg | OK | 3,05705  | 13,5239 | 2,1453   | -2,72501 | 0,00642998  | 0,0365726   | yes |
| AN10476 | ChrII_A_nidulans_FGSC_A4:2945533-2946808   | WT_5hasex | WT_veg | OK | 116,523  | 620,155 | 2,41201  | -4,48083 | 7,43548E-06 | 0,000110535 | yes |
| AN10483 | ChrII_A_nidulans_FGSC_A4:2736621-2737642   | WT_5hasex | WT_veg | OK | 75,6575  | 329,071 | 2,12084  | -4,34073 | 0,000014201 | 0,000197024 | yes |
| AN10484 | ChrII_A_nidulans_FGSC_A4:2716660-2718020   | WT_5hasex | WT_veg | OK | 17,862   | 57,5459 | 1,68782  | -3,08286 | 0,00205019  | 0,0142751   | yes |
| AN1049  | ChrVIII_A_nidulans_FGSC_A4:1679199-1680273 | WT_5hasex | WT_veg | OK | 106,746  | 521,805 | 2,28932  | -4,17298 | 3,00646E-05 | 0,000384443 | yes |
| AN10491 | ChrII_A_nidulans_FGSC_A4:2677115-2679497   | WT_5hasex | WT_veg | OK | 6,66593  | 19,7915 | 1,57     | -2,67174 | 0,00754598  | 0,0416236   | yes |
| AN10496 | ChrII_A_nidulans_FGSC_A4:2294913-2296370   | WT_5hasex | WT_veg | OK | 106,122  | 431,845 | 2,02479  | -4,12312 | 3,73769E-05 | 0,00046501  | yes |
| AN10497 | ChrII_A_nidulans_FGSC_A4:2248138-2250965   | WT_5hasex | WT_veg | OK | 18,6591  | 50,3215 | 1,4313   | -2,84432 | 0,00445061  | 0,0271124   | yes |
| AN10498 | ChrII_A_nidulans_FGSC_A4:2252073-2255913   | WT_5hasex | WT_veg | OK | 19,7078  | 47,5736 | 1,27139  | -2,59968 | 0,00933103  | 0,0492808   | yes |
| AN10499 | ChrII_A_nidulans_FGSC_A4:2468195-2469256   | WT_5hasex | WT_veg | OK | 0,811906 | 13,2683 | 4,03052  | -4,48001 | 7,46387E-06 | 0,000110834 | yes |
| AN10501 | ChrII_A_nidulans_FGSC_A4:2332058-2334183   | WT_5hasex | WT_veg | OK | 18,4586  | 47,3338 | 1,35858  | -2,6222  | 0,0087365   | 0,04683     | yes |
| AN10506 | ChrII_A_nidulans_FGSC_A4:2005375-2007664   | WT_5hasex | WT_veg | OK | 12,8324  | 1,69852 | -2,91744 | 4,19426  | 2,73766E-05 | 0,00035326  | yes |
| AN10507 | ChrII_A_nidulans_FGSC_A4:2008314-2009054   | WT_5hasex | WT_veg | OK | 468,037  | 114,579 | -2,03028 | 3,83389  | 0,000126135 | 0,00134426  | yes |
| AN10508 | ChrII_A_nidulans_FGSC_A4:1884675-1885515   | WT_5hasex | WT_veg | OK | 65,1083  | 243,846 | 1,90506  | -3,81008 | 0,000138925 | 0,00145735  | yes |
| AN10510 | ChrII_A_nidulans_FGSC_A4:1908788-1909770   | WT_5hasex | WT_veg | OK | 60,3746  | 291,1   | 2,2695   | -4,56847 | 4,91299E-06 | 7,61688E-05 | yes |
| AN10511 | ChrII_A_nidulans_FGSC_A4:2074586-2075745   | WT_5hasex | WT_veg | OK | 86,1969  | 251,676 | 1,54586  | -3,14055 | 0,00168633  | 0,0121068   | yes |
| AN10513 | ChrII_A_nidulans_FGSC_A4:1839486-1842290   | WT_5hasex | WT_veg | OK | 15,9285  | 42,8349 | 1,42718  | -2,8607  | 0,00422706  | 0,0259679   | yes |
| AN10518 | ChrII_A_nidulans_FGSC_A4:1705528-1706752   | WT_5hasex | WT_veg | OK | 461,448  | 2147,9  | 2,21869  | -3,6893  | 0,000224871 | 0,00220545  | yes |
| AN10533 | ChrII_A_nidulans_FGSC_A4:1588593-1591898   | WT_5hasex | WT_veg | OK | 221,14   | 1466,37 | 2,72921  | -4,60475 | 4,1296E-06  | 6,50826E-05 | yes |
| AN10536 | ChrII_A_nidulans_FGSC_A4:1498382-1499676   | WT_5hasex | WT_veg | OK | 39,4244  | 141,198 | 1,84056  | -3,57275 | 0,000353251 | 0,00323315  | yes |
| AN10537 | ChrII_A_nidulans_FGSC_A4:1472278-1474489   | WT_5hasex | WT_veg | OK | 25,2214  | 99,1718 | 1,97528  | -4,06968 | 4,70776E-05 | 0,000567769 | yes |
| AN10539 | ChrIII_A_nidulans_FGSC_A4:2464113-2464962  | WT_5hasex | WT_veg | OK | 45,7542  | 251,718 | 2,45983  | -4,78474 | 1,71207E-06 | 2,98755E-05 | yes |
| AN10546 | ChrIII_A_nidulans_FGSC_A4:2381444-2382743  | WT_5hasex | WT_veg | OK | 95,0952  | 227,175 | 1,25636  | -2,6045  | 0,00920075  | 0,0487648   | yes |

## Supplementary table 2

|         |                                            |           |        |    |         |         |         |          |             |             |     |
|---------|--------------------------------------------|-----------|--------|----|---------|---------|---------|----------|-------------|-------------|-----|
| AN10547 | ChrIII_A_nidulans_FGSC_A4:2375455-2376211  | WT_5hasex | WT_veg | OK | 216,62  | 1027,16 | 2,24542 | -4,37159 | 1,23343E-05 | 0,000172958 | yes |
| AN10551 | ChrIII_A_nidulans_FGSC_A4:2119089-2123487  | WT_5hasex | WT_veg | OK | 10,8553 | 80,178  | 2,88481 | -5,81402 | 6,09913E-09 | 1,84318E-07 | yes |
| AN10552 | ChrIII_A_nidulans_FGSC_A4:2096271-2097966  | WT_5hasex | WT_veg | OK | 23,9486 | 74,4539 | 1,63641 | -3,08963 | 0,00200407  | 0,013993    | yes |
| AN10557 | ChrIII_A_nidulans_FGSC_A4:1961381-1963894  | WT_5hasex | WT_veg | OK | 14,0465 | 134,995 | 3,26463 | -6,50349 | 7,8477E-11  | 3,27939E-09 | yes |
| AN10560 | ChrIII_A_nidulans_FGSC_A4:1965637-1968206  | WT_5hasex | WT_veg | OK | 13,3649 | 71,4107 | 2,41769 | -4,69649 | 2,64666E-06 | 4,40146E-05 | yes |
| AN10567 | ChrIII_A_nidulans_FGSC_A4:1739470-1740843  | WT_5hasex | WT_veg | OK | 33,5178 | 93,8738 | 1,4858  | -2,81349 | 0,00490072  | 0,0292691   | yes |
| AN10569 | ChrIII_A_nidulans_FGSC_A4:1799917-1800706  | WT_5hasex | WT_veg | OK | 36,0404 | 151,94  | 2,07582 | -3,7872  | 0,000152356 | 0,00157564  | yes |
| AN10574 | ChrIII_A_nidulans_FGSC_A4:1399045-1403873  | WT_5hasex | WT_veg | OK | 39,3448 | 139,831 | 1,82944 | -3,55536 | 0,000377469 | 0,00341803  | yes |
| AN10575 | ChrIII_A_nidulans_FGSC_A4:1462957-1463934  | WT_5hasex | WT_veg | OK | 347,491 | 955,715 | 1,4596  | -2,88688 | 0,00389087  | 0,0242466   | yes |
| AN10579 | ChrIII_A_nidulans_FGSC_A4:1490533-1491676  | WT_5hasex | WT_veg | OK | 2,73528 | 14,8217 | 2,43795 | -3,1075  | 0,00188675  | 0,0132907   | yes |
| AN10580 | ChrIII_A_nidulans_FGSC_A4:1295955-1298078  | WT_5hasex | WT_veg | OK | 51,9007 | 149,333 | 1,52471 | -3,07494 | 0,00210545  | 0,0145829   | yes |
| AN10581 | ChrIII_A_nidulans_FGSC_A4:1211530-1212691  | WT_5hasex | WT_veg | OK | 997,365 | 3807,18 | 1,93253 | -3,35009 | 0,00080784  | 0,00654896  | yes |
| AN10590 | ChrIII_A_nidulans_FGSC_A4:1091180-1092012  | WT_5hasex | WT_veg | OK | 21,7086 | 93,1077 | 2,10063 | -3,60801 | 0,000308556 | 0,00288938  | yes |
| AN10592 | ChrIII_A_nidulans_FGSC_A4:1277030-1277582  | WT_5hasex | WT_veg | OK | 24,0605 | 128,622 | 2,4184  | -3,98665 | 6,70125E-05 | 0,000773899 | yes |
| AN10598 | ChrIII_A_nidulans_FGSC_A4:927622-930210    | WT_5hasex | WT_veg | OK | 26,2724 | 75,0907 | 1,51508 | -3,13885 | 0,00169612  | 0,012167    | yes |
| AN10607 | ChrIII_A_nidulans_FGSC_A4:768215-770924    | WT_5hasex | WT_veg | OK | 32,9274 | 94,1212 | 1,51523 | -3,10518 | 0,00190161  | 0,0133792   | yes |
| AN10616 | ChrIII_A_nidulans_FGSC_A4:765808-767013    | WT_5hasex | WT_veg | OK | 16,373  | 71,6356 | 2,12936 | -3,75853 | 0,000170914 | 0,0017411   | yes |
| AN10618 | ChrIII_A_nidulans_FGSC_A4:671074-673174    | WT_5hasex | WT_veg | OK | 10,4036 | 41,7614 | 2,00508 | -3,60585 | 0,000311139 | 0,00290992  | yes |
| AN10619 | ChrIII_A_nidulans_FGSC_A4:673230-675428    | WT_5hasex | WT_veg | OK | 25,6669 | 100,669 | 1,97164 | -3,71957 | 0,000199559 | 0,00198846  | yes |
| AN10625 | ChrIII_A_nidulans_FGSC_A4:49562-51566      | WT_5hasex | WT_veg | OK | 19,5272 | 57,3992 | 1,55554 | -2,9436  | 0,00324418  | 0,0208591   | yes |
| AN10627 | ChrIII_A_nidulans_FGSC_A4:51865-53499      | WT_5hasex | WT_veg | OK | 14,336  | 81,2662 | 2,50302 | -4,39504 | 1,10752E-05 | 0,000157323 | yes |
| AN10629 | ChrIII_A_nidulans_FGSC_A4:31166-32699      | WT_5hasex | WT_veg | OK | 5,24651 | 23,425  | 2,15862 | -3,27246 | 0,00106614  | 0,00827552  | yes |
| AN10631 | ChrIII_A_nidulans_FGSC_A4:37831-38651      | WT_5hasex | WT_veg | OK | 14,1869 | 62,3028 | 2,13474 | -3,43589 | 0,000590603 | 0,00502171  | yes |
| AN10634 | ChrV_A_nidulans_FGSC_A4:1259268-1261828    | WT_5hasex | WT_veg | OK | 61,985  | 240,93  | 1,95863 | -3,8629  | 0,000112051 | 0,00121317  | yes |
| AN10641 | ChrV_A_nidulans_FGSC_A4:1281089-1281868    | WT_5hasex | WT_veg | OK | 73,1999 | 228,145 | 1,64004 | -3,15861 | 0,00158522  | 0,011507    | yes |
| AN10643 | ChrV_A_nidulans_FGSC_A4:1275319-1275993    | WT_5hasex | WT_veg | OK | 43,9783 | 164,629 | 1,90435 | -3,29627 | 0,000979767 | 0,00771824  | yes |
| AN10645 | ChrV_A_nidulans_FGSC_A4:1269505-1270684    | WT_5hasex | WT_veg | OK | 64,5883 | 253,239 | 1,97115 | -4,0991  | 4,14765E-05 | 0,000509244 | yes |
| AN10646 | ChrV_A_nidulans_FGSC_A4:1322131-1323298    | WT_5hasex | WT_veg | OK | 49,45   | 181,638 | 1,87702 | -3,85307 | 0,000116645 | 0,00125667  | yes |
| AN1066  | ChrVIII_A_nidulans_FGSC_A4:1626434-1627741 | WT_5hasex | WT_veg | OK | 1249,41 | 7519,33 | 2,58935 | -3,03112 | 0,00243652  | 0,0164576   | yes |
| AN10662 | ChrV_A_nidulans_FGSC_A4:3068530-3070129    | WT_5hasex | WT_veg | OK | 5,37652 | 20,442  | 1,92679 | -2,89977 | 0,00373439  | 0,0234634   | yes |
| AN10676 | ChrV_A_nidulans_FGSC_A4:2549711-2551257    | WT_5hasex | WT_veg | OK | 51,8072 | 181,972 | 1,81249 | -3,76829 | 0,000164369 | 0,00168293  | yes |
| AN10678 | ChrV_A_nidulans_FGSC_A4:2480740-2481600    | WT_5hasex | WT_veg | OK | 186,352 | 2519,42 | 3,75699 | -7,41965 | 1,17462E-13 | 7,37152E-12 | yes |
| AN1068  | ChrVIII_A_nidulans_FGSC_A4:1623614-1625196 | WT_5hasex | WT_veg | OK | 20,7864 | 74,037  | 1,8326  | -3,31776 | 0,000907423 | 0,00724306  | yes |
| AN10690 | ChrV_A_nidulans_FGSC_A4:2447377-2448229    | WT_5hasex | WT_veg | OK | 7,12816 | 41,7607 | 2,55055 | -3,5526  | 0,000381437 | 0,00345039  | yes |
| AN10695 | ChrV_A_nidulans_FGSC_A4:2408197-2409235    | WT_5hasex | WT_veg | OK | 49,9983 | 220,273 | 2,13934 | -4,2674  | 1,97768E-05 | 0,000263634 | yes |
| AN10698 | ChrV_A_nidulans_FGSC_A4:2433572-2434803    | WT_5hasex | WT_veg | OK | 10,8693 | 43,897  | 2,01387 | -2,83797 | 0,00454008  | 0,027539    | yes |
| AN10699 | ChrV_A_nidulans_FGSC_A4:2426829-2429153    | WT_5hasex | WT_veg | OK | 4,67737 | 92,4615 | 4,30508 | -6,95796 | 3,45235E-12 | 1,77016E-10 | yes |
| AN10700 | ChrV_A_nidulans_FGSC_A4:2106701-2109184    | WT_5hasex | WT_veg | OK | 8,42371 | 32,6065 | 1,95263 | -3,01565 | 0,00256432  | 0,0171689   | yes |
| AN10701 | ChrV_A_nidulans_FGSC_A4:2051029-2052425    | WT_5hasex | WT_veg | OK | 153,961 | 618,175 | 2,00545 | -4,09522 | 4,21769E-05 | 0,000516995 | yes |
| AN10706 | ChrV_A_nidulans_FGSC_A4:1753937-1755003    | WT_5hasex | WT_veg | OK | 220,967 | 720,047 | 1,70426 | -3,36091 | 0,000776852 | 0,00632907  | yes |
| AN10712 | ChrV_A_nidulans_FGSC_A4:2049662-2050743    | WT_5hasex | WT_veg | OK | 228,482 | 840,073 | 1,87843 | -3,67626 | 0,000236678 | 0,00230228  | yes |
| AN10713 | ChrV_A_nidulans_FGSC_A4:1952597-1953898    | WT_5hasex | WT_veg | OK | 75,3655 | 181,763 | 1,27009 | -2,62107 | 0,00876534  | 0,046946    | yes |
| AN10714 | ChrV_A_nidulans_FGSC_A4:1933059-1934344    | WT_5hasex | WT_veg | OK | 10,4075 | 33,2604 | 1,67618 | -2,7182  | 0,00656382  | 0,0372168   | yes |
| AN10716 | ChrV_A_nidulans_FGSC_A4:1711823-1712805    | WT_5hasex | WT_veg | OK | 51,0875 | 129,055 | 1,33694 | -2,67503 | 0,00747221  | 0,0412819   | yes |
| AN10717 | ChrV_A_nidulans_FGSC_A4:1715604-1716172    | WT_5hasex | WT_veg | OK | 65,8656 | 240,682 | 1,86953 | -3,49967 | 0,000465838 | 0,00410198  | yes |
| AN10734 | ChrI_A_nidulans_FGSC_A4:2067939-2076455    | WT_5hasex | WT_veg | OK | 12,7818 | 35,9279 | 1,49102 | -3,15099 | 0,00162717  | 0,0117582   | yes |

## Supplementary table 2

|         |                                            |           |        |    |         |         |          |          |             |             |     |
|---------|--------------------------------------------|-----------|--------|----|---------|---------|----------|----------|-------------|-------------|-----|
| AN10736 | Chrl_A_nidulans_FGSC_A4:1994432-1996177    | WT_5hasex | WT_veg | OK | 123,42  | 492,394 | 1,99623  | -4,08373 | 4,43177E-05 | 0,000539702 | yes |
| AN10738 | Chrl_A_nidulans_FGSC_A4:2187456-2188066    | WT_5hasex | WT_veg | OK | 49,4779 | 147,576 | 1,57661  | -2,95262 | 0,00315089  | 0,0203667   | yes |
| AN10745 | Chrl_A_nidulans_FGSC_A4:2101158-2103220    | WT_5hasex | WT_veg | OK | 104,552 | 275,549 | 1,39809  | -2,88768 | 0,00388095  | 0,0241905   | yes |
| AN10747 | Chrl_A_nidulans_FGSC_A4:2097285-2099202    | WT_5hasex | WT_veg | OK | 64,2117 | 223,566 | 1,79979  | -3,78242 | 0,000155311 | 0,00160114  | yes |
| AN10751 | Chrl_A_nidulans_FGSC_A4:1993322-1994401    | WT_5hasex | WT_veg | OK | 100,814 | 330,395 | 1,7125   | -3,5815  | 0,000341625 | 0,00314398  | yes |
| AN10752 | Chrl_A_nidulans_FGSC_A4:1960194-1961793    | WT_5hasex | WT_veg | OK | 100,505 | 307,368 | 1,6127   | -3,34079 | 0,000835411 | 0,00673599  | yes |
| AN10758 | Chrl_A_nidulans_FGSC_A4:1679577-1681017    | WT_5hasex | WT_veg | OK | 10,6337 | 34,4469 | 1,69573  | -2,90766 | 0,00364142  | 0,0229783   | yes |
| AN10761 | Chrl_A_nidulans_FGSC_A4:1705039-1705583    | WT_5hasex | WT_veg | OK | 2514,3  | 11800,5 | 2,23062  | -3,49876 | 0,000467432 | 0,00411324  | yes |
| AN10769 | Chrl_A_nidulans_FGSC_A4:1319827-1323371    | WT_5hasex | WT_veg | OK | 20,1478 | 79,3222 | 1,9771   | -4,05879 | 4,93278E-05 | 0,000591234 | yes |
| AN1077  | ChrVIII_A_nidulans_FGSC_A4:1585482-1587967 | WT_5hasex | WT_veg | OK | 5,30899 | 1,20099 | -2,14421 | 2,66937  | 0,00759929  | 0,0418472   | yes |
| AN10771 | Chrl_A_nidulans_FGSC_A4:1323745-1325376    | WT_5hasex | WT_veg | OK | 50,8803 | 279,815 | 2,45929  | -5,10593 | 3,29169E-07 | 6,82052E-06 | yes |
| AN10773 | Chrl_A_nidulans_FGSC_A4:1242542-1243031    | WT_5hasex | WT_veg | OK | 5,629   | 75,8191 | 3,75161  | -5,02908 | 4,92849E-07 | 9,73841E-06 | yes |
| AN10778 | Chrl_A_nidulans_FGSC_A4:973326-975178      | WT_5hasex | WT_veg | OK | 58,7977 | 152,842 | 1,37821  | -2,67118 | 0,00755846  | 0,0416837   | yes |
| AN10782 | Chrl_A_nidulans_FGSC_A4:880687-881831      | WT_5hasex | WT_veg | OK | 70,1543 | 1242,14 | 4,14615  | -8,3601  | 0           | 0           | yes |
| AN10792 | Chrl_A_nidulans_FGSC_A4:847628-849552      | WT_5hasex | WT_veg | OK | 45,8523 | 165,26  | 1,84967  | -3,85253 | 0,000116905 | 0,00125895  | yes |
| AN10794 | Chrl_A_nidulans_FGSC_A4:853836-857632      | WT_5hasex | WT_veg | OK | 8,75811 | 26,6659 | 1,60631  | -3,13871 | 0,00169693  | 0,0121712   | yes |
| AN10798 | Chrl_A_nidulans_FGSC_A4:577040-578346      | WT_5hasex | WT_veg | OK | 26,2335 | 154,782 | 2,56076  | -4,97655 | 6,47285E-07 | 1,24702E-05 | yes |
| AN10799 | Chrl_A_nidulans_FGSC_A4:528658-531107      | WT_5hasex | WT_veg | OK | 13,5081 | 37,7043 | 1,4809   | -2,86628 | 0,00415328  | 0,0255776   | yes |
| AN1080  | ChrVIII_A_nidulans_FGSC_A4:1576282-1577153 | WT_5hasex | WT_veg | OK | 12,7821 | 39,6783 | 1,63422  | -2,60514 | 0,0091836   | 0,0486936   | yes |
| AN10806 | Chrl_A_nidulans_FGSC_A4:574981-576731      | WT_5hasex | WT_veg | OK | 35,8036 | 116,318 | 1,69989  | -3,43075 | 0,000601906 | 0,00510044  | yes |
| AN10809 | Chrl_A_nidulans_FGSC_A4:464158-465163      | WT_5hasex | WT_veg | OK | 94,2979 | 235,754 | 1,32199  | -2,65564 | 0,00791571  | 0,0431992   | yes |
| AN10812 | Chrl_A_nidulans_FGSC_A4:64525-67115        | WT_5hasex | WT_veg | OK | 2,52696 | 10,2004 | 2,01315  | -2,88858 | 0,00386985  | 0,0241472   | yes |
| AN10823 | Chrl_A_nidulans_FGSC_A4:2305056-2306350    | WT_5hasex | WT_veg | OK | 38,255  | 115,766 | 1,59749  | -3,15275 | 0,0016174   | 0,0117      | yes |
| AN10835 | Chrl_A_nidulans_FGSC_A4:2601209-2602210    | WT_5hasex | WT_veg | OK | 17,6581 | 71,4697 | 2,017    | -3,49195 | 0,000479502 | 0,00420239  | yes |
| AN10837 | Chrl_A_nidulans_FGSC_A4:2693171-2695697    | WT_5hasex | WT_veg | OK | 43,5378 | 388,924 | 3,15915  | -6,17304 | 6,69884E-10 | 2,44622E-08 | yes |
| AN10839 | Chrl_A_nidulans_FGSC_A4:2602457-2603767    | WT_5hasex | WT_veg | OK | 87,0929 | 270,601 | 1,63554  | -3,25075 | 0,00115103  | 0,00881556  | yes |
| AN10840 | Chrl_A_nidulans_FGSC_A4:2691580-2693089    | WT_5hasex | WT_veg | OK | 17,2573 | 101,307 | 2,55346  | -4,64162 | 3,45694E-06 | 5,57386E-05 | yes |
| AN10847 | Chrl_A_nidulans_FGSC_A4:2954887-2955813    | WT_5hasex | WT_veg | OK | 2251,29 | 10139,4 | 2,17115  | -3,14385 | 0,0016674   | 0,0120004   | yes |
| AN10848 | Chrl_A_nidulans_FGSC_A4:2978479-2980388    | WT_5hasex | WT_veg | OK | 21,3676 | 56,9445 | 1,41413  | -2,60877 | 0,00908679  | 0,0482927   | yes |
| AN10856 | Chrl_A_nidulans_FGSC_A4:3529534-3533165    | WT_5hasex | WT_veg | OK | 28,1116 | 93,5106 | 1,73397  | -3,58824 | 0,000332911 | 0,00307459  | yes |
| AN10857 | Chrl_A_nidulans_FGSC_A4:3386073-3386799    | WT_5hasex | WT_veg | OK | 49,256  | 128,509 | 1,3835   | -2,68135 | 0,00733256  | 0,0406475   | yes |
| AN10858 | Chrl_A_nidulans_FGSC_A4:3528628-3529183    | WT_5hasex | WT_veg | OK | 105,72  | 296,163 | 1,48614  | -3,01212 | 0,0025943   | 0,0173313   | yes |
| AN10864 | Chrl_A_nidulans_FGSC_A4:3639064-3640017    | WT_5hasex | WT_veg | OK | 32,536  | 131,475 | 2,01468  | -3,76105 | 0,000169203 | 0,00172703  | yes |
| AN10865 | Chrl_A_nidulans_FGSC_A4:3640314-3641042    | WT_5hasex | WT_veg | OK | 26,9694 | 100,839 | 1,90265  | -3,16498 | 0,00155095  | 0,0113005   | yes |
| AN10866 | Chrl_A_nidulans_FGSC_A4:3592945-3594392    | WT_5hasex | WT_veg | OK | 23,0813 | 73,107  | 1,66329  | -3,20415 | 0,00135461  | 0,0100995   | yes |
| AN10877 | ChrIV_A_nidulans_FGSC_A4:1388936-1391286   | WT_5hasex | WT_veg | OK | 46,0841 | 184,568 | 2,00181  | -4,16596 | 3,10049E-05 | 0,000394637 | yes |
| AN1088  | ChrVIII_A_nidulans_FGSC_A4:1556048-1559472 | WT_5hasex | WT_veg | OK | 65,727  | 372,654 | 2,50328  | -5,13733 | 2,78671E-07 | 5,86463E-06 | yes |
| AN10880 | ChrIV_A_nidulans_FGSC_A4:1238224-1239151   | WT_5hasex | WT_veg | OK | 154,927 | 496,485 | 1,68016  | -3,33717 | 0,000846366 | 0,00681908  | yes |
| AN1089  | ChrVIII_A_nidulans_FGSC_A4:1556048-1559472 | WT_5hasex | WT_veg | OK | 134,198 | 477,725 | 1,83182  | -3,59469 | 0,000324774 | 0,00301217  | yes |
| AN1090  | ChrVIII_A_nidulans_FGSC_A4:1552441-1553774 | WT_5hasex | WT_veg | OK | 23,3895 | 73,4337 | 1,65058  | -3,09268 | 0,00198361  | 0,0138816   | yes |
| AN10901 | ChrIV_A_nidulans_FGSC_A4:882622-886039     | WT_5hasex | WT_veg | OK | 22,891  | 99,1996 | 2,11555  | -4,05261 | 5,06491E-05 | 0,000605271 | yes |
| AN10903 | ChrIV_A_nidulans_FGSC_A4:886484-888338     | WT_5hasex | WT_veg | OK | 44,6979 | 484,947 | 3,43955  | -6,11078 | 9,91458E-10 | 3,51518E-08 | yes |
| AN10910 | ChrIV_A_nidulans_FGSC_A4:616237-619313     | WT_5hasex | WT_veg | OK | 75,7343 | 25,7453 | -1,55664 | 3,14815  | 0,00164305  | 0,0118561   | yes |
| AN1092  | ChrVIII_A_nidulans_FGSC_A4:1546066-1547665 | WT_5hasex | WT_veg | OK | 29,0728 | 117,248 | 2,01182  | -3,98377 | 6,78319E-05 | 0,000782247 | yes |
| AN10921 | ChrIV_A_nidulans_FGSC_A4:443757-448621     | WT_5hasex | WT_veg | OK | 28,2241 | 7,06379 | -1,99841 | 4,10096  | 4,11432E-05 | 0,000505463 | yes |
| AN10930 | ChrIV_A_nidulans_FGSC_A4:200562-202216     | WT_5hasex | WT_veg | OK | 1,67744 | 8,62591 | 2,36241  | -3,14638 | 0,00165302  | 0,01191     | yes |



## Supplementary table 2

|         |                                            |           |        |    |          |         |          |          |             |             |     |
|---------|--------------------------------------------|-----------|--------|----|----------|---------|----------|----------|-------------|-------------|-----|
| AN10936 | ChrIV_A_nidulans_FGSC_A4:202510-204288     | WT_5hasex | WT_veg | OK | 8,94579  | 38,6573 | 2,11146  | -3,60086 | 0,000317166 | 0,00295503  | yes |
| AN10940 | ChrIV_A_nidulans_FGSC_A4:1514375-1518102   | WT_5hasex | WT_veg | OK | 26,2569  | 78,3263 | 1,5768   | -2,91926 | 0,00350867  | 0,0223099   | yes |
| AN10943 | ChrIV_A_nidulans_FGSC_A4:1712410-1713918   | WT_5hasex | WT_veg | OK | 20,8717  | 124,111 | 2,572    | -4,75193 | 2,01479E-06 | 3,46162E-05 | yes |
| AN1095  | ChrVIII_A_nidulans_FGSC_A4:1535731-1536846 | WT_5hasex | WT_veg | OK | 58,4065  | 160,041 | 1,45424  | -2,96265 | 0,00305004  | 0,01982     | yes |
| AN10956 | ChrIV_A_nidulans_FGSC_A4:1716996-1718978   | WT_5hasex | WT_veg | OK | 38,0659  | 134,135 | 1,81711  | -3,7361  | 0,000186896 | 0,0018798   | yes |
| AN1096  | ChrVIII_A_nidulans_FGSC_A4:1532995-1534971 | WT_5hasex | WT_veg | OK | 49,7446  | 144,718 | 1,54063  | -3,25205 | 0,00114576  | 0,00878162  | yes |
| AN10960 | ChrIV_A_nidulans_FGSC_A4:1840460-1841772   | WT_5hasex | WT_veg | OK | 10,1079  | 56,21   | 2,47535  | -4,07815 | 4,53947E-05 | 0,000550616 | yes |
| AN10962 | ChrIV_A_nidulans_FGSC_A4:2060194-2062794   | WT_5hasex | WT_veg | OK | 7,41844  | 20,8786 | 1,49284  | -2,65621 | 0,00790248  | 0,043145    | yes |
| AN10965 | ChrIV_A_nidulans_FGSC_A4:2119988-2120846   | WT_5hasex | WT_veg | OK | 163,592  | 581,917 | 1,83071  | -3,79784 | 0,00014596  | 0,00151939  | yes |
| AN10967 | ChrIV_A_nidulans_FGSC_A4:1527770-1528331   | WT_5hasex | WT_veg | OK | 42,1779  | 117,055 | 1,47263  | -2,61872 | 0,00882594  | 0,0472176   | yes |
| AN1097  | ChrVIII_A_nidulans_FGSC_A4:1521093-1523303 | WT_5hasex | WT_veg | OK | 129,774  | 590,473 | 2,18587  | -4,28095 | 1,86093E-05 | 0,000250886 | yes |
| AN10970 | ChrIV_A_nidulans_FGSC_A4:1727532-1729235   | WT_5hasex | WT_veg | OK | 40,0034  | 205,189 | 2,35876  | -4,39804 | 1,09232E-05 | 0,000155374 | yes |
| AN10975 | ChrIV_A_nidulans_FGSC_A4:2170510-2171497   | WT_5hasex | WT_veg | OK | 96,0088  | 290,014 | 1,59488  | -3,30587 | 0,000946807 | 0,00751054  | yes |
| AN10977 | ChrIV_A_nidulans_FGSC_A4:2248244-2248711   | WT_5hasex | WT_veg | OK | 910,319  | 3317,91 | 1,86583  | -3,31344 | 0,000921562 | 0,00733693  | yes |
| AN10986 | ChrIV_A_nidulans_FGSC_A4:2429712-2431518   | WT_5hasex | WT_veg | OK | 2,24534  | 12,3014 | 2,45382  | -2,80459 | 0,00503804  | 0,0299188   | yes |
| AN10990 | ChrIV_A_nidulans_FGSC_A4:2300111-2301104   | WT_5hasex | WT_veg | OK | 35,696   | 98,8329 | 1,46923  | -2,80808 | 0,00498376  | 0,0296603   | yes |
| AN10991 | ChrIV_A_nidulans_FGSC_A4:2383205-2384092   | WT_5hasex | WT_veg | OK | 61,0969  | 266,151 | 2,12307  | -4,27172 | 1,93973E-05 | 0,000259499 | yes |
| AN11001 | ChrIV_A_nidulans_FGSC_A4:2431894-2432664   | WT_5hasex | WT_veg | OK | 160,33   | 1171,05 | 2,86869  | -5,93529 | 2,93327E-09 | 9,4243E-08  | yes |
| AN11016 | ChrIV_A_nidulans_FGSC_A4:2699188-2702650   | WT_5hasex | WT_veg | OK | 28,035   | 123,156 | 2,13518  | -4,24299 | 2,20558E-05 | 0,000290613 | yes |
| AN11022 | ChrIV_A_nidulans_FGSC_A4:2593310-2596302   | WT_5hasex | WT_veg | OK | 26,894   | 78,2586 | 1,54097  | -3,20767 | 0,00133814  | 0,00999447  | yes |
| AN11036 | ChrII_A_nidulans_FGSC_A4:740553-742510     | WT_5hasex | WT_veg | OK | 5,61942  | 49,4894 | 3,13863  | -5,04422 | 4,55386E-07 | 9,10113E-06 | yes |
| AN11039 | ChrII_A_nidulans_FGSC_A4:603541-604431     | WT_5hasex | WT_veg | OK | 76,8562  | 331,901 | 2,11052  | -4,36102 | 1,29456E-05 | 0,000180728 | yes |
| AN11043 | ChrII_A_nidulans_FGSC_A4:737579-738185     | WT_5hasex | WT_veg | OK | 20,2518  | 99,3252 | 2,29411  | -3,78998 | 0,000150661 | 0,0015597   | yes |
| AN11051 | ChrII_A_nidulans_FGSC_A4:742801-744573     | WT_5hasex | WT_veg | OK | 3,00366  | 12,46   | 2,05251  | -2,82077 | 0,00479084  | 0,0287538   | yes |
| AN11055 | ChrII_A_nidulans_FGSC_A4:1204291-1205507   | WT_5hasex | WT_veg | OK | 108,603  | 367,925 | 1,76035  | -3,67631 | 0,000236631 | 0,00230225  | yes |
| AN11060 | ChrII_A_nidulans_FGSC_A4:1202842-1204031   | WT_5hasex | WT_veg | OK | 48,8234  | 199,128 | 2,02805  | -4,11092 | 3,94088E-05 | 0,000486823 | yes |
| AN11066 | ChrII_A_nidulans_FGSC_A4:1391021-1392351   | WT_5hasex | WT_veg | OK | 18,7487  | 106,145 | 2,50117  | -4,694   | 2,67914E-06 | 0,000044456 | yes |
| AN11087 | ChrV_A_nidulans_FGSC_A4:865333-867059      | WT_5hasex | WT_veg | OK | 7,69591  | 33,4267 | 2,11884  | -3,40787 | 0,000654722 | 0,00547364  | yes |
| AN11107 | ChrIII_A_nidulans_FGSC_A4:3041279-3043375  | WT_5hasex | WT_veg | OK | 7,36569  | 24,1831 | 1,71511  | -2,91309 | 0,00357875  | 0,02266     | yes |
| AN11108 | ChrIII_A_nidulans_FGSC_A4:2998616-2999711  | WT_5hasex | WT_veg | OK | 2,17457  | 12,3114 | 2,5012   | -3,15286 | 0,00161679  | 0,0116972   | yes |
| AN11109 | ChrIII_A_nidulans_FGSC_A4:3109135-3109871  | WT_5hasex | WT_veg | OK | 32,2515  | 132,766 | 2,04145  | -3,43655 | 0,000589167 | 0,00501194  | yes |
| AN11115 | ChrIII_A_nidulans_FGSC_A4:2938095-2939580  | WT_5hasex | WT_veg | OK | 20,8108  | 55,8074 | 1,42312  | -2,70243 | 0,00688342  | 0,0386111   | yes |
| AN11119 | ChrIII_A_nidulans_FGSC_A4:2866805-2868667  | WT_5hasex | WT_veg | OK | 83,3723  | 226,469 | 1,44168  | -2,92195 | 0,00347852  | 0,0221477   | yes |
| AN1112  | ChrVIII_A_nidulans_FGSC_A4:1471119-1471867 | WT_5hasex | WT_veg | OK | 98,9004  | 243,845 | 1,30192  | -2,67467 | 0,00748034  | 0,0413137   | yes |
| AN11120 | ChrIII_A_nidulans_FGSC_A4:2864047-2866029  | WT_5hasex | WT_veg | OK | 22,8774  | 295,45  | 3,69092  | -6,61311 | 3,76341E-11 | 1,64616E-09 | yes |
| AN11121 | ChrIII_A_nidulans_FGSC_A4:2861615-2863283  | WT_5hasex | WT_veg | OK | 17,0165  | 79,7528 | 2,2286   | -4,1654  | 3,10812E-05 | 0,000395511 | yes |
| AN11132 | ChrIII_A_nidulans_FGSC_A4:2596490-2597927  | WT_5hasex | WT_veg | OK | 50,2316  | 167,135 | 1,73434  | -3,42987 | 0,000603875 | 0,00511463  | yes |
| AN11136 | ChrIII_A_nidulans_FGSC_A4:2584812-2585412  | WT_5hasex | WT_veg | OK | 351,608  | 1054,52 | 1,58455  | -3,18918 | 0,00142678  | 0,0105334   | yes |
| AN11138 | ChrIII_A_nidulans_FGSC_A4:2617818-2619847  | WT_5hasex | WT_veg | OK | 42,1525  | 146,862 | 1,80077  | -3,74252 | 0,000182186 | 0,00184126  | yes |
| AN11140 | ChrVII_A_nidulans_FGSC_A4:562058-563855    | WT_5hasex | WT_veg | OK | 57,8214  | 408,661 | 2,82123  | -4,98553 | 6,17914E-07 | 0,000011966 | yes |
| AN11146 | ChrVII_A_nidulans_FGSC_A4:572856-573695    | WT_5hasex | WT_veg | OK | 94,2479  | 346,345 | 1,87768  | -3,56475 | 0,000364209 | 0,00331687  | yes |
| AN11149 | ChrVII_A_nidulans_FGSC_A4:501383-503301    | WT_5hasex | WT_veg | OK | 22,4186  | 6,6011  | -1,76392 | 2,67035  | 0,00757721  | 0,0417594   | yes |
| AN11151 | ChrVII_A_nidulans_FGSC_A4:398429-399838    | WT_5hasex | WT_veg | OK | 0,804656 | 12,5743 | 3,96596  | -4,13089 | 3,61364E-05 | 0,00045183  | yes |
| AN11154 | ChrVII_A_nidulans_FGSC_A4:402419-403035    | WT_5hasex | WT_veg | OK | 92,6678  | 341,964 | 1,8837   | -3,55129 | 0,000383344 | 0,00346464  | yes |
| AN11161 | ChrVII_A_nidulans_FGSC_A4:60984-62376      | WT_5hasex | WT_veg | OK | 10,9909  | 106,544 | 3,27707  | -5,60229 | 2,11536E-08 | 5,70211E-07 | yes |
| AN11162 | ChrVI_A_nidulans_FGSC_A4:563364-566032     | WT_5hasex | WT_veg | OK | 17,8568  | 88,422  | 2,30793  | -4,65213 | 3,28531E-06 | 0,000053382 | yes |

## Supplementary table 2

|         |                                            |           |        |    |          |         |          |          |             |             |     |
|---------|--------------------------------------------|-----------|--------|----|----------|---------|----------|----------|-------------|-------------|-----|
| AN11163 | ChrVI_A_nidulans_FGSC_A4:483636-487941     | WT_5hasex | WT_veg | OK | 22,9144  | 56,2258 | 1,29498  | -2,61026 | 0,00904745  | 0,0481373   | yes |
| AN11169 | ChrVI_A_nidulans_FGSC_A4:283761-286062     | WT_5hasex | WT_veg | OK | 19,7948  | 63,564  | 1,68309  | -3,33181 | 0,000862818 | 0,00693776  | yes |
| AN11176 | ChrVI_A_nidulans_FGSC_A4:402777-403737     | WT_5hasex | WT_veg | OK | 19,0413  | 60,7066 | 1,67272  | -2,93703 | 0,00331369  | 0,0212642   | yes |
| AN11196 | ChrVII_A_nidulans_FGSC_A4:197423-199305    | WT_5hasex | WT_veg | OK | 15,2897  | 1,45607 | -3,39241 | 4,22681  | 2,37033E-05 | 0,000309828 | yes |
| AN11209 | ChrVIII_A_nidulans_FGSC_A4:133391-135054   | WT_5hasex | WT_veg | OK | 6,68918  | 59,8003 | 3,16025  | -4,58337 | 4,57544E-06 | 7,14003E-05 | yes |
| AN11210 | ChrVIII_A_nidulans_FGSC_A4:224076-224877   | WT_5hasex | WT_veg | OK | 12,9606  | 43,8456 | 1,7583   | -2,71452 | 0,00663722  | 0,0375274   | yes |
| AN11215 | ChrVIII_A_nidulans_FGSC_A4:225489-228452   | WT_5hasex | WT_veg | OK | 14,2309  | 71,754  | 2,33403  | -2,96954 | 0,00298248  | 0,0194654   | yes |
| AN11216 | ChrVIII_A_nidulans_FGSC_A4:448800-450798   | WT_5hasex | WT_veg | OK | 2,46731  | 9,30255 | 1,91469  | -2,63304 | 0,00846241  | 0,0456127   | yes |
| AN11219 | ChrVIII_A_nidulans_FGSC_A4:291385-292898   | WT_5hasex | WT_veg | OK | 4,21722  | 21,1049 | 2,32322  | -2,90374 | 0,00368737  | 0,023238    | yes |
| AN11224 | ChrII_A_nidulans_FGSC_A4:1483988-1485111   | WT_5hasex | WT_veg | OK | 26,363   | 103,172 | 1,96847  | -3,70824 | 0,000208703 | 0,00206738  | yes |
| AN11223 | ChrVIII_A_nidulans_FGSC_A4:1448186-1450313 | WT_5hasex | WT_veg | OK | 11,6666  | 48,0843 | 2,04318  | -3,66057 | 0,000251654 | 0,00242903  | yes |
| AN11230 | ChrIII_A_nidulans_FGSC_A4:1948639-1949402  | WT_5hasex | WT_veg | OK | 54,6492  | 165,118 | 1,59523  | -3,11043 | 0,00186815  | 0,0131815   | yes |
| AN11238 | ChrII_A_nidulans_FGSC_A4:2947006-2947662   | WT_5hasex | WT_veg | OK | 95,3041  | 488,397 | 2,35745  | -4,41161 | 1,02603E-05 | 0,000147224 | yes |
| AN1124  | ChrVIII_A_nidulans_FGSC_A4:1445138-1447273 | WT_5hasex | WT_veg | OK | 20,7503  | 78,2029 | 1,91409  | -3,62548 | 0,000288425 | 0,00272817  | yes |
| AN11246 | ChrIII_A_nidulans_FGSC_A4:3186081-3186951  | WT_5hasex | WT_veg | OK | 114,186  | 28,5237 | -2,00115 | 3,73155  | 0,000190302 | 0,00190965  | yes |
| AN11250 | ChrI_A_nidulans_FGSC_A4:3533196-3534601    | WT_5hasex | WT_veg | OK | 39,5933  | 101,433 | 1,3572   | -2,63237 | 0,00847923  | 0,0456846   | yes |
| AN11262 | ChrVIII_A_nidulans_FGSC_A4:4360413-4360972 | WT_5hasex | WT_veg | OK | 3,11419  | 26,7515 | 3,10269  | -3,43548 | 0,000591514 | 0,00502829  | yes |
| AN11281 | ChrVIII_A_nidulans_FGSC_A4:2469509-2470122 | WT_5hasex | WT_veg | OK | 63,2932  | 1081,66 | 4,09505  | -7,65591 | 1,90958E-14 | 1,33066E-12 | yes |
| AN11313 | ChrVII_A_nidulans_FGSC_A4:1751471-1751953  | WT_5hasex | WT_veg | OK | 5,67334  | 141,02  | 4,63556  | -4,91266 | 8,98477E-07 | 1,66957E-05 | yes |
| AN11314 | ChrVII_A_nidulans_FGSC_A4:1845552-1845959  | WT_5hasex | WT_veg | OK | 65,7153  | 839,826 | 3,67579  | -6,04143 | 1,52753E-09 | 5,17758E-08 | yes |
| AN11337 | ChrVII_A_nidulans_FGSC_A4:3828605-3828956  | WT_5hasex | WT_veg | OK | 499,551  | 98,2449 | -2,34618 | 4,49383  | 6,99533E-06 | 0,000104734 | yes |
| AN11391 | ChrVI_A_nidulans_FGSC_A4:972038-972320     | WT_5hasex | WT_veg | OK | 16,3877  | 120,125 | 2,87384  | -3,86254 | 0,000112213 | 0,00121417  | yes |
| AN11406 | ChrII_A_nidulans_FGSC_A4:3532947-3533230   | WT_5hasex | WT_veg | OK | 89,7023  | 355,16  | 1,98525  | -3,3922  | 0,00069334  | 0,0057488   | yes |
| AN1142  | ChrVIII_A_nidulans_FGSC_A4:1401097-1403018 | WT_5hasex | WT_veg | OK | 9,96454  | 30,7791 | 1,62708  | -2,83899 | 0,00452571  | 0,0274614   | yes |
| AN11436 | ChrIII_A_nidulans_FGSC_A4:2186284-2187531  | WT_5hasex | WT_veg | OK | 13,8291  | 59,5384 | 2,10611  | -3,65537 | 0,000256807 | 0,00247375  | yes |
| AN11461 | ChrIII_A_nidulans_FGSC_A4:12330-12658      | WT_5hasex | WT_veg | OK | 7,13674  | 52,8784 | 2,88934  | -3,35941 | 0,000781081 | 0,00636063  | yes |
| AN11477 | ChrV_A_nidulans_FGSC_A4:2976196-2976863    | WT_5hasex | WT_veg | OK | 31,0187  | 48,7788 | -2,66881 | 3,26578  | 0,00109162  | 0,00844203  | yes |
| AN1164  | ChrVIII_A_nidulans_FGSC_A4:1330956-1332988 | WT_5hasex | WT_veg | OK | 19,0115  | 119,413 | 2,65102  | -5,23834 | 1,62024E-07 | 3,59154E-06 | yes |
| AN11641 | ChrVI_A_nidulans_FGSC_A4:334435-335330     | WT_5hasex | WT_veg | OK | 8,62783  | 81,0408 | 3,23158  | -2,8001  | 0,00510861  | 0,0302522   | yes |
| AN11699 | ChrVI_A_nidulans_FGSC_A4:2049944-2050601   | WT_5hasex | WT_veg | OK | 29,7953  | 148,727 | 2,31951  | -3,92439 | 8,69493E-05 | 0,000971704 | yes |
| AN11702 | ChrVI_A_nidulans_FGSC_A4:1999802-2000736   | WT_5hasex | WT_veg | OK | 283,344  | 30,6702 | -3,20765 | 5,96721  | 2,41352E-09 | 7,87014E-08 | yes |
| AN11704 | ChrVI_A_nidulans_FGSC_A4:1977238-1978206   | WT_5hasex | WT_veg | OK | 62,4759  | 180,628 | 1,53165  | -3,06406 | 0,00218355  | 0,0150397   | yes |
| AN11705 | ChrVI_A_nidulans_FGSC_A4:1885028-1885877   | WT_5hasex | WT_veg | OK | 4492,04  | 23171,7 | 2,36692  | -2,79427 | 0,00520163  | 0,0307024   | yes |
| AN11714 | ChrII_A_nidulans_FGSC_A4:3699849-3700421   | WT_5hasex | WT_veg | OK | 7,70019  | 31,396  | 2,02762  | -2,79141 | 0,00524791  | 0,0309253   | yes |
| AN11728 | ChrII_A_nidulans_FGSC_A4:3333468-3334329   | WT_5hasex | WT_veg | OK | 116,594  | 299,64  | 1,36174  | -2,802   | 0,00507864  | 0,0301121   | yes |
| AN11729 | ChrII_A_nidulans_FGSC_A4:3268177-3269988   | WT_5hasex | WT_veg | OK | 31,2478  | 141,614 | 2,18014  | -4,50572 | 6,61478E-06 | 9,94057E-05 | yes |
| AN11749 | ChrIV_A_nidulans_FGSC_A4:1688014-1689225   | WT_5hasex | WT_veg | OK | 3,61856  | 14,6896 | 2,0213   | -2,77509 | 0,00551858  | 0,0322165   | yes |
| AN1175  | ChrVIII_A_nidulans_FGSC_A4:1294546-1295736 | WT_5hasex | WT_veg | OK | 18,9086  | 85,9703 | 2,1848   | -3,87384 | 0,000107135 | 0,00116535  | yes |
| AN11753 | ChrIV_A_nidulans_FGSC_A4:1889046-1889684   | WT_5hasex | WT_veg | OK | 13,7775  | 47,0791 | 1,77277  | -2,64083 | 0,00827028  | 0,0447798   | yes |
| AN11762 | ChrIV_A_nidulans_FGSC_A4:2109647-2110283   | WT_5hasex | WT_veg | OK | 0,920184 | 6,81716 | 2,88918  | -2,75351 | 0,00589594  | 0,0339916   | yes |
| AN11766 | ChrIII_A_nidulans_FGSC_A4:742249-742726    | WT_5hasex | WT_veg | OK | 32,1795  | 331,597 | 3,36522  | -5,74894 | 8,98034E-09 | 2,62605E-07 | yes |
| AN11773 | ChrIII_A_nidulans_FGSC_A4:324341-326703    | WT_5hasex | WT_veg | OK | 6,66585  | 47,0193 | 2,81839  | -4,7887  | 1,67863E-06 | 2,93506E-05 | yes |
| AN11788 | ChrV_A_nidulans_FGSC_A4:1954108-1955225    | WT_5hasex | WT_veg | OK | 32,0786  | 89,0504 | 1,47301  | -2,85474 | 0,00430716  | 0,0263673   | yes |
| AN11801 | ChrVII_A_nidulans_FGSC_A4:2354721-2355300  | WT_5hasex | WT_veg | OK | 29,8789  | 188,389 | 2,65651  | -4,51527 | 6,3237E-06  | 9,55797E-05 | yes |
| AN11815 | ChrV_A_nidulans_FGSC_A4:2567602-2568475    | WT_5hasex | WT_veg | OK | 17,861   | 63,5846 | 1,83186  | -3,14639 | 0,001653    | 0,01191     | yes |
| AN11843 | ChrVIII_A_nidulans_FGSC_A4:1403201-1403504 | WT_5hasex | WT_veg | OK | 19,843   | 137,476 | 2,79248  | -4,1099  | 3,95833E-05 | 0,000488517 | yes |

## Supplementary table 2

|         |                                            |           |        |    |          |         |              |              |             |             |     |
|---------|--------------------------------------------|-----------|--------|----|----------|---------|--------------|--------------|-------------|-------------|-----|
| AN11846 | ChrVIII_A_nidulans_FGSC_A4:4460858-4462628 | WT_5hasex | WT_veg | OK | 0        | 35,2681 | 1.79769e+308 | 1.79769e+308 | 0,00418287  | 0,0257246   | yes |
| AN1185  | ChrVIII_A_nidulans_FGSC_A4:1259131-1260785 | WT_5hasex | WT_veg | OK | 0,537143 | 4,32197 | 3,00831      | -2,88342     | 0,00393383  | 0,024459    | yes |
| AN11852 | Chrl_A_nidulans_FGSC_A4:755058-755508      | WT_5hasex | WT_veg | OK | 2,93671  | 21,8758 | 2,89706      | -3,29963     | 0,00096814  | 0,00763956  | yes |
| AN11854 | Chrl_A_nidulans_FGSC_A4:566795-567470      | WT_5hasex | WT_veg | OK | 21,7838  | 67,3911 | 1,6293       | -2,69328     | 0,00707523  | 0,0394421   | yes |
| AN11858 | Chrl_A_nidulans_FGSC_A4:377039-378804      | WT_5hasex | WT_veg | OK | 21,0424  | 63,1311 | 1,58505      | -3,10179     | 0,00192355  | 0,0135063   | yes |
| AN11861 | ChrVII_A_nidulans_FGSC_A4:2725681-2726940  | WT_5hasex | WT_veg | OK | 11,0091  | 67,3523 | 2,61302      | -4,2567      | 2,07466E-05 | 0,00027537  | yes |
| AN11862 | ChrVII_A_nidulans_FGSC_A4:2727139-2727796  | WT_5hasex | WT_veg | OK | 83,2586  | 351,986 | 2,07985      | -4,19596     | 2,71721E-05 | 0,000351054 | yes |
| AN11866 | ChrVII_A_nidulans_FGSC_A4:2929502-2929845  | WT_5hasex | WT_veg | OK | 150,668  | 638,693 | 2,08375      | -4,01378     | 5,97552E-05 | 0,00069973  | yes |
| AN11869 | ChrVII_A_nidulans_FGSC_A4:2972366-2972924  | WT_5hasex | WT_veg | OK | 2,0451   | 38,9825 | 4,25258      | -4,58429     | 4,55542E-06 | 0,000071123 | yes |
| AN11874 | ChrV_A_nidulans_FGSC_A4:523442-528619      | WT_5hasex | WT_veg | OK | 11,0952  | 50,2712 | 2,17979      | -3,77386     | 0,000160744 | 0,00165153  | yes |
| AN1188  | ChrVIII_A_nidulans_FGSC_A4:1251198-1252898 | WT_5hasex | WT_veg | OK | 38,1617  | 121,694 | 1,67306      | -3,3968      | 0,000681794 | 0,00566561  | yes |
| AN11882 | ChrVII_A_nidulans_FGSC_A4:1389343-1389640  | WT_5hasex | WT_veg | OK | 52,3096  | 289,417 | 2,468        | -3,78935     | 0,000151043 | 0,00156268  | yes |
| AN11891 | ChrVIII_A_nidulans_FGSC_A4:1969625-1971535 | WT_5hasex | WT_veg | OK | 102,748  | 271,577 | 1,40225      | -2,86465     | 0,00417471  | 0,0256885   | yes |
| AN11892 | ChrVIII_A_nidulans_FGSC_A4:1965381-1968633 | WT_5hasex | WT_veg | OK | 9,89608  | 30,5133 | 1,62451      | -3,13009     | 0,00174751  | 0,0124886   | yes |
| AN11903 | Chrl_A_nidulans_FGSC_A4:3041301-3043188    | WT_5hasex | WT_veg | OK | 23,5954  | 7,35223 | -1,68225     | 3,15758      | 0,00159087  | 0,0115388   | yes |
| AN11908 | Chrl_A_nidulans_FGSC_A4:3205654-3206692    | WT_5hasex | WT_veg | OK | 6,99993  | 29,5914 | 2,07976      | -3,06597     | 0,00216964  | 0,0149596   | yes |
| AN1192  | ChrVIII_A_nidulans_FGSC_A4:1236531-1237645 | WT_5hasex | WT_veg | OK | 42,0325  | 129,386 | 1,62211      | -3,22497     | 0,00125986  | 0,00949643  | yes |
| AN11929 | ChrVI_A_nidulans_FGSC_A4:457942-458945     | WT_5hasex | WT_veg | OK | 20,6751  | 83,798  | 2,01902      | -3,56685     | 0,000361294 | 0,00329433  | yes |
| AN11931 | ChrVI_A_nidulans_FGSC_A4:334435-335330     | WT_5hasex | WT_veg | OK | 174,159  | 651,603 | 1,90359      | -3,81927     | 0,000133847 | 0,00141551  | yes |
| AN11935 | ChrVIII_A_nidulans_FGSC_A4:1007746-1008288 | WT_5hasex | WT_veg | OK | 21,3266  | 80,0749 | 1,90869      | -2,98712     | 0,0028162   | 0,0185372   | yes |
| AN11936 | ChrVIII_A_nidulans_FGSC_A4:980372-982022   | WT_5hasex | WT_veg | OK | 266,159  | 810,01  | 1,60565      | -2,87676     | 0,00401781  | 0,0248779   | yes |
| AN11955 | ChrV_A_nidulans_FGSC_A4:3127392-3127890    | WT_5hasex | WT_veg | OK | 6,01141  | 24,529  | 2,02871      | -2,66076     | 0,00779644  | 0,0426951   | yes |
| AN11961 | ChrVII_A_nidulans_FGSC_A4:4246262-4246589  | WT_5hasex | WT_veg | OK | 58,1527  | 210,1   | 1,85316      | -2,96306     | 0,00304593  | 0,0198006   | yes |
| AN11977 | ChrlII_A_nidulans_FGSC_A4:1181861-1183279  | WT_5hasex | WT_veg | OK | 79,1338  | 648,177 | 3,03402      | -6,0566      | 1,39025E-09 | 4,76467E-08 | yes |
| AN11979 | Chrl_A_nidulans_FGSC_A4:3216293-3217403    | WT_5hasex | WT_veg | OK | 15,1243  | 2,05394 | -2,8804      | 3,06796      | 0,00215527  | 0,0148762   | yes |
| AN1198  | ChrVIII_A_nidulans_FGSC_A4:1222456-1224125 | WT_5hasex | WT_veg | OK | 44,4699  | 188,587 | 2,08433      | -4,09024     | 0,000043093 | 0,00052676  | yes |
| AN1199  | ChrVIII_A_nidulans_FGSC_A4:1219701-1221982 | WT_5hasex | WT_veg | OK | 78,7854  | 921,999 | 3,54876      | -7,06456     | 1,61138E-12 | 8,72308E-11 | yes |
| AN11990 | Chrl_A_nidulans_FGSC_A4:3521598-3522063    | WT_5hasex | WT_veg | OK | 13,3974  | 63,2495 | 2,2391       | -2,66271     | 0,00775132  | 0,0425013   | yes |
| AN1200  | ChrVIII_A_nidulans_FGSC_A4:1214952-1218567 | WT_5hasex | WT_veg | OK | 36,5795  | 170,844 | 2,22357      | -4,60763     | 4,07275E-06 | 6,43026E-05 | yes |
| AN12017 | Chrl_A_nidulans_FGSC_A4:1355036-1357737    | WT_5hasex | WT_veg | OK | 66,9896  | 164,553 | 1,29654      | -2,68299     | 0,00729661  | 0,0404825   | yes |
| AN1204  | ChrVIII_A_nidulans_FGSC_A4:1202132-1202696 | WT_5hasex | WT_veg | OK | 179,646  | 496,017 | 1,46523      | -2,89434     | 0,00379961  | 0,023811    | yes |
| AN12042 | ChrlI_A_nidulans_FGSC_A4:2338481-2339868   | WT_5hasex | WT_veg | OK | 7,62946  | 26,3185 | 1,78643      | -2,80015     | 0,00510784  | 0,030251    | yes |
| AN12056 | ChrVII_A_nidulans_FGSC_A4:768926-770138    | WT_5hasex | WT_veg | OK | 37,118   | 155,868 | 2,07013      | -3,99381     | 6,50187E-05 | 0,000753118 | yes |
| AN12057 | ChrlV_A_nidulans_FGSC_A4:1435522-1437901   | WT_5hasex | WT_veg | OK | 54,5634  | 248,878 | 2,18943      | -4,5536      | 5,27356E-06 | 8,12779E-05 | yes |
| AN12058 | ChrlV_A_nidulans_FGSC_A4:1430221-1432565   | WT_5hasex | WT_veg | OK | 18,0636  | 70,5602 | 1,96577      | -3,90054     | 9,59783E-05 | 0,0010575   | yes |
| AN12078 | ChrlII_A_nidulans_FGSC_A4:2952850-2956968  | WT_5hasex | WT_veg | OK | 0        | 7,8625  | 1.79769e+308 | 1.79769e+308 | 0,00489369  | 0,0292338   | yes |
| AN1208  | ChrVIII_A_nidulans_FGSC_A4:1191944-1193670 | WT_5hasex | WT_veg | OK | 22,2075  | 65,1035 | 1,55169      | -3,04999     | 0,00228845  | 0,0156064   | yes |
| AN12082 | ChrlII_A_nidulans_FGSC_A4:2833546-2835297  | WT_5hasex | WT_veg | OK | 0,52103  | 8,04539 | 3,94873      | -4,14057     | 3,46444E-05 | 0,000434959 | yes |
| AN12084 | ChrlV_A_nidulans_FGSC_A4:2627025-2628218   | WT_5hasex | WT_veg | OK | 745,566  | 3140,25 | 2,07447      | -3,54732     | 0,000389174 | 0,00351007  | yes |
| AN12085 | ChrlV_A_nidulans_FGSC_A4:2638972-2639537   | WT_5hasex | WT_veg | OK | 213,225  | 1522,54 | 2,83603      | -5,89569     | 3,73109E-09 | 1,17781E-07 | yes |
| AN12088 | ChrlV_A_nidulans_FGSC_A4:2710082-2711681   | WT_5hasex | WT_veg | OK | 26,1753  | 217,786 | 3,05663      | -5,41975     | 5,96833E-08 | 1,46557E-06 | yes |
| AN12098 | ChrlI_A_nidulans_FGSC_A4:1969415-1970357   | WT_5hasex | WT_veg | OK | 3,05058  | 15,2127 | 2,31812      | -3,05356     | 0,00226143  | 0,0154741   | yes |
| AN12102 | ChrlI_A_nidulans_FGSC_A4:1865795-1866803   | WT_5hasex | WT_veg | OK | 89,9468  | 334,532 | 1,895        | -3,38129     | 0,000721474 | 0,00594725  | yes |
| AN12106 | ChrlI_A_nidulans_FGSC_A4:1643483-1644133   | WT_5hasex | WT_veg | OK | 20,1902  | 68,1124 | 1,75426      | -2,75485     | 0,00587196  | 0,0338954   | yes |
| AN12119 | ChrVII_A_nidulans_FGSC_A4:3822324-3823038  | WT_5hasex | WT_veg | OK | 218,356  | 40,2959 | -2,43798     | 4,49093      | 7,09117E-06 | 0,000106048 | yes |
| AN1212  | ChrVIII_A_nidulans_FGSC_A4:1182971-1185209 | WT_5hasex | WT_veg | OK | 17,5708  | 88,9727 | 2,34018      | -4,53289     | 5,81817E-06 | 8,86547E-05 | yes |

## Supplementary table 2

|         |                                            |           |        |    |          |          |          |          |             |             |     |
|---------|--------------------------------------------|-----------|--------|----|----------|----------|----------|----------|-------------|-------------|-----|
| AN12120 | ChrVII_A_nidulans_FGSC_A4:3839406-3839796  | WT_5hasex | WT_veg | OK | 60,0039  | 221,627  | 1,885    | -3,2852  | 0,00101912  | 0,00798143  | yes |
| AN12130 | ChrVII_A_nidulans_FGSC_A4:65286-65976      | WT_5hasex | WT_veg | OK | 1,33373  | 9,05972  | 2,764    | -2,78505 | 0,00535198  | 0,0313918   | yes |
| AN12149 | ChrIV_A_nidulans_FGSC_A4:770762-772266     | WT_5hasex | WT_veg | OK | 52,9296  | 179,825  | 1,76445  | -3,52764 | 0,000419289 | 0,00374112  | yes |
| AN1215  | ChrVIII_A_nidulans_FGSC_A4:1174664-1176601 | WT_5hasex | WT_veg | OK | 29,2224  | 177,795  | 2,60507  | -5,04588 | 4,51433E-07 | 9,04281E-06 | yes |
| AN12150 | ChrIV_A_nidulans_FGSC_A4:753001-754115     | WT_5hasex | WT_veg | OK | 2,75599  | 32,6069  | 3,56453  | -3,53213 | 0,00041223  | 0,00369007  | yes |
| AN12169 | ChrII_A_nidulans_FGSC_A4:944340-946173     | WT_5hasex | WT_veg | OK | 82,3823  | 333,452  | 2,01707  | -4,00843 | 0,000061123 | 0,000714152 | yes |
| AN12171 | ChrII_A_nidulans_FGSC_A4:999810-1002123    | WT_5hasex | WT_veg | OK | 43,2124  | 113,312  | 1,39078  | -2,66699 | 0,00765338  | 0,0420804   | yes |
| AN12177 | ChrII_A_nidulans_FGSC_A4:2840577-2840975   | WT_5hasex | WT_veg | OK | 28,717   | 151,689  | 2,40114  | -3,68043 | 0,000232841 | 0,00226959  | yes |
| AN12178 | ChrII_A_nidulans_FGSC_A4:2744986-2745946   | WT_5hasex | WT_veg | OK | 1,25047  | 9,6275   | 2,94469  | -2,97135 | 0,00296491  | 0,0193604   | yes |
| AN12198 | ChrVII_A_nidulans_FGSC_A4:3092496-3093320  | WT_5hasex | WT_veg | OK | 571,353  | 4966,41  | 3,11975  | -5,34406 | 9,08876E-08 | 2,13957E-06 | yes |
| AN12203 | ChrII_A_nidulans_FGSC_A4:1291569-1292931   | WT_5hasex | WT_veg | OK | 19,3369  | 60,7476  | 1,65147  | -3,0673  | 0,00216003  | 0,0149028   | yes |
| AN12206 | ChrII_A_nidulans_FGSC_A4:1311063-1312234   | WT_5hasex | WT_veg | OK | 7,52314  | 72,3342  | 3,26527  | -5,06398 | 4,10602E-07 | 8,29467E-06 | yes |
| AN12209 | ChrVIII_A_nidulans_FGSC_A4:715103-717404   | WT_5hasex | WT_veg | OK | 32,5961  | 131,154  | 2,00849  | -3,48744 | 0,000487666 | 0,0042584   | yes |
| AN12216 | ChrVIII_A_nidulans_FGSC_A4:2637039-2640269 | WT_5hasex | WT_veg | OK | 19,4642  | 88,3634  | 2,18263  | -4,40414 | 1,06206E-05 | 0,000151605 | yes |
| AN12221 | ChrIII_A_nidulans_FGSC_A4:1036067-1036865  | WT_5hasex | WT_veg | OK | 94,866   | 368,314  | 1,95697  | -4,06226 | 4,86008E-05 | 0,000584257 | yes |
| AN12229 | ChrIII_A_nidulans_FGSC_A4:2139838-2140904  | WT_5hasex | WT_veg | OK | 223,321  | 563,837  | 1,33616  | -2,70662 | 0,00679712  | 0,0382581   | yes |
| AN12236 | ChrVII_A_nidulans_FGSC_A4:4015953-4017869  | WT_5hasex | WT_veg | OK | 5,57848  | 19,0971  | 1,77541  | -2,88603 | 0,00390129  | 0,0242903   | yes |
| AN12261 | ChrI_A_nidulans_FGSC_A4:1647545-1648228    | WT_5hasex | WT_veg | OK | 6,06505  | 26,9572  | 2,15208  | -2,90682 | 0,00365127  | 0,0230328   | yes |
| AN12277 | ChrVII_A_nidulans_FGSC_A4:437059-438494    | WT_5hasex | WT_veg | OK | 0,138087 | 4,50668  | 5,02842  | -3,27181 | 0,00106862  | 0,00829103  | yes |
| AN1229  | ChrVIII_A_nidulans_FGSC_A4:1129002-1129886 | WT_5hasex | WT_veg | OK | 60,4459  | 212,794  | 1,81574  | -3,63002 | 0,000283395 | 0,00268835  | yes |
| AN12290 | ChrIV_A_nidulans_FGSC_A4:1078232-1079255   | WT_5hasex | WT_veg | OK | 26,1466  | 86,6483  | 1,72855  | -3,19557 | 0,00139555  | 0,0103358   | yes |
| AN12291 | ChrIV_A_nidulans_FGSC_A4:1076575-1077727   | WT_5hasex | WT_veg | OK | 1,86058  | 8,65197  | 2,21728  | -2,82093 | 0,0047885   | 0,0287464   | yes |
| AN12305 | ChrVII_A_nidulans_FGSC_A4:1831726-1833143  | WT_5hasex | WT_veg | OK | 153,348  | 404,932  | 1,40087  | -2,87791 | 0,00400319  | 0,0248078   | yes |
| AN12307 | ChrVII_A_nidulans_FGSC_A4:1867273-1867855  | WT_5hasex | WT_veg | OK | 7,2915   | 36,6959  | 2,33133  | -3,11106 | 0,00186418  | 0,01316     | yes |
| AN1231  | ChrVIII_A_nidulans_FGSC_A4:1125059-1127170 | WT_5hasex | WT_veg | OK | 6,48451  | 30,8423  | 2,24984  | -3,76803 | 0,000164542 | 0,00168405  | yes |
| AN12319 | ChrVII_A_nidulans_FGSC_A4:2473417-2473702  | WT_5hasex | WT_veg | OK | 63,0267  | 242,846  | 1,94601  | -3,32122 | 0,00089625  | 0,0071677   | yes |
| AN1232  | ChrVIII_A_nidulans_FGSC_A4:1121680-1124156 | WT_5hasex | WT_veg | OK | 18,737   | 55,4279  | 1,56472  | -3,11208 | 0,00185772  | 0,0131246   | yes |
| AN1233  | ChrVIII_A_nidulans_FGSC_A4:1117981-1120735 | WT_5hasex | WT_veg | OK | 7,56989  | 22,3284  | 1,56054  | -2,77904 | 0,00545195  | 0,0318747   | yes |
| AN12331 | ChrIV_A_nidulans_FGSC_A4:2825115-2832711   | WT_5hasex | WT_veg | OK | 5,72154  | 0,241462 | -4,56653 | 5,42499  | 5,79586E-08 | 1,42656E-06 | yes |
| AN12336 | ChrVII_A_nidulans_FGSC_A4:3371554-3372059  | WT_5hasex | WT_veg | OK | 87,7318  | 273,541  | 1,64059  | -3,06727 | 0,00216026  | 0,0149028   | yes |
| AN12354 | ChrII_A_nidulans_FGSC_A4:3834494-3835773   | WT_5hasex | WT_veg | OK | 3,65667  | 20,8234  | 2,5096   | -3,28797 | 0,00100913  | 0,00791266  | yes |
| AN12355 | ChrII_A_nidulans_FGSC_A4:3834091-3834421   | WT_5hasex | WT_veg | OK | 3,77993  | 20,3615  | 2,42941  | -2,66884 | 0,00761128  | 0,0418824   | yes |
| AN1236  | ChrVIII_A_nidulans_FGSC_A4:1110128-1111816 | WT_5hasex | WT_veg | OK | 5,97787  | 25,7092  | 2,10458  | -3,1955  | 0,00139588  | 0,0103358   | yes |
| AN12364 | ChrIII_A_nidulans_FGSC_A4:2656018-2656938  | WT_5hasex | WT_veg | OK | 53,3516  | 141,525  | 1,40746  | -2,78921 | 0,00528373  | 0,0310868   | yes |
| AN12388 | ChrII_A_nidulans_FGSC_A4:2706241-2707144   | WT_5hasex | WT_veg | OK | 1,92345  | 9,58421  | 2,31697  | -2,78598 | 0,00533669  | 0,0313267   | yes |
| AN12389 | ChrII_A_nidulans_FGSC_A4:2703847-2705300   | WT_5hasex | WT_veg | OK | 38,6882  | 173,029  | 2,16105  | -4,38414 | 1,16445E-05 | 0,000164296 | yes |
| AN12419 | ChrVIII_A_nidulans_FGSC_A4:2653427-2654216 | WT_5hasex | WT_veg | OK | 17,3312  | 118,6    | 2,77466  | -4,63334 | 3,59818E-06 | 5,76435E-05 | yes |
| AN12426 | ChrII_A_nidulans_FGSC_A4:1084855-1087570   | WT_5hasex | WT_veg | OK | 67,0261  | 608,625  | 3,18276  | -5,97153 | 2,35045E-09 | 7,67882E-08 | yes |
| AN12429 | ChrVIII_A_nidulans_FGSC_A4:712578-714609   | WT_5hasex | WT_veg | OK | 8,4831   | 31,0844  | 1,87353  | -3,16059 | 0,00157449  | 0,0114417   | yes |
| AN1243  | ChrVIII_A_nidulans_FGSC_A4:1070769-1072702 | WT_5hasex | WT_veg | OK | 35,5353  | 164,355  | 2,20949  | -4,00271 | 6,26214E-05 | 0,000729544 | yes |
| AN12441 | ChrI_A_nidulans_FGSC_A4:1156959-1158070    | WT_5hasex | WT_veg | OK | 21,3863  | 1,45735  | -3,87526 | 3,658    | 0,000254189 | 0,00245033  | yes |
| AN1245  | ChrVIII_A_nidulans_FGSC_A4:1065602-1066336 | WT_5hasex | WT_veg | OK | 200,999  | 490,972  | 1,28845  | -2,62172 | 0,00874864  | 0,0468711   | yes |
| AN12450 | ChrII_A_nidulans_FGSC_A4:3886421-3888378   | WT_5hasex | WT_veg | OK | 15,75    | 73,4739  | 2,22188  | -2,84908 | 0,00438458  | 0,0267755   | yes |
| AN12460 | ChrVI_A_nidulans_FGSC_A4:3302000-3303031   | WT_5hasex | WT_veg | OK | 2,79091  | 16,6078  | 2,57305  | -3,44222 | 0,000576955 | 0,00492324  | yes |
| AN1247  | ChrVIII_A_nidulans_FGSC_A4:1061301-1063099 | WT_5hasex | WT_veg | OK | 237,806  | 686,18   | 1,5288   | -3,04787 | 0,00230467  | 0,0157047   | yes |
| AN1250  | ChrVIII_A_nidulans_FGSC_A4:1052986-1055356 | WT_5hasex | WT_veg | OK | 392,606  | 1604,58  | 2,03105  | -3,40245 | 0,000667843 | 0,00556291  | yes |

## Supplementary table 2

|        |                                            |           |        |    |          |         |          |          |             |             |     |
|--------|--------------------------------------------|-----------|--------|----|----------|---------|----------|----------|-------------|-------------|-----|
| AN1255 | ChrVIII_A_nidulans_FGSC_A4:1034807-1039412 | WT_5hasex | WT_veg | OK | 13,289   | 33,8016 | 1,34686  | -2,75754 | 0,00582384  | 0,033684    | yes |
| AN1256 | ChrVIII_A_nidulans_FGSC_A4:1031188-1033836 | WT_5hasex | WT_veg | OK | 38,0099  | 129,265 | 1,76589  | -3,68492 | 0,000228774 | 0,00223703  | yes |
| AN1260 | ChrVIII_A_nidulans_FGSC_A4:1020319-1021925 | WT_5hasex | WT_veg | OK | 23,2869  | 78,206  | 1,74776  | -3,43229 | 0,0005985   | 0,0050765   | yes |
| AN1262 | ChrVIII_A_nidulans_FGSC_A4:1017038-1018365 | WT_5hasex | WT_veg | OK | 769,982  | 114,913 | -2,74429 | 4,81039  | 1,50635E-06 | 2,65688E-05 | yes |
| AN1269 | ChrVIII_A_nidulans_FGSC_A4:992774-994042   | WT_5hasex | WT_veg | OK | 22,7739  | 85,4703 | 1,90804  | -3,44907 | 0,000562516 | 0,00481649  | yes |
| AN1274 | ChrVIII_A_nidulans_FGSC_A4:978827-980022   | WT_5hasex | WT_veg | OK | 322,616  | 2486,76 | 2,94638  | -5,07568 | 3,86118E-07 | 7,85151E-06 | yes |
| AN1278 | ChrVIII_A_nidulans_FGSC_A4:971843-972256   | WT_5hasex | WT_veg | OK | 1267,06  | 10433,6 | 3,04168  | -5,50498 | 3,69204E-08 | 9,45601E-07 | yes |
| AN1281 | ChrVIII_A_nidulans_FGSC_A4:960247-963741   | WT_5hasex | WT_veg | OK | 27,9348  | 72,7245 | 1,38038  | -2,75716 | 0,00583059  | 0,0337123   | yes |
| AN1288 | ChrVIII_A_nidulans_FGSC_A4:940361-942563   | WT_5hasex | WT_veg | OK | 20,0579  | 127,777 | 2,67139  | -5,37373 | 7,71231E-08 | 1,84119E-06 | yes |
| AN1295 | ChrVIII_A_nidulans_FGSC_A4:921410-922697   | WT_5hasex | WT_veg | OK | 44,2768  | 130,78  | 1,56252  | -2,93316 | 0,00335536  | 0,0214895   | yes |
| AN1305 | ChrVIII_A_nidulans_FGSC_A4:883521-884274   | WT_5hasex | WT_veg | OK | 15,9627  | 62,3858 | 1,96651  | -3,147   | 0,00164957  | 0,0118885   | yes |
| AN1319 | ChrVIII_A_nidulans_FGSC_A4:844695-845477   | WT_5hasex | WT_veg | OK | 230,887  | 668,218 | 1,53313  | -3,10572 | 0,00189816  | 0,0133603   | yes |
| AN1320 | ChrVIII_A_nidulans_FGSC_A4:842396-843226   | WT_5hasex | WT_veg | OK | 0,233046 | 5,11311 | 4,45552  | -2,85625 | 0,0042868   | 0,0262672   | yes |
| AN1322 | ChrVIII_A_nidulans_FGSC_A4:832620-835047   | WT_5hasex | WT_veg | OK | 5,08042  | 25,9708 | 2,35387  | -3,34408 | 0,000825569 | 0,00666983  | yes |
| AN1327 | ChrVIII_A_nidulans_FGSC_A4:814378-816520   | WT_5hasex | WT_veg | OK | 22,7168  | 60,5561 | 1,41451  | -2,85537 | 0,00429865  | 0,0263275   | yes |
| AN1330 | ChrVIII_A_nidulans_FGSC_A4:807568-809159   | WT_5hasex | WT_veg | OK | 279,42   | 1001,78 | 1,84206  | -3,53213 | 0,000412229 | 0,00369007  | yes |
| AN1331 | ChrVIII_A_nidulans_FGSC_A4:805457-806747   | WT_5hasex | WT_veg | OK | 219,004  | 597,112 | 1,44704  | -2,91274 | 0,00358273  | 0,0226824   | yes |
| AN1336 | ChrVIII_A_nidulans_FGSC_A4:797652-799143   | WT_5hasex | WT_veg | OK | 19,1964  | 96,2553 | 2,32603  | -4,43559 | 9,18212E-06 | 0,000133471 | yes |
| AN1340 | ChrVIII_A_nidulans_FGSC_A4:784810-785833   | WT_5hasex | WT_veg | OK | 83,44    | 212,384 | 1,34786  | -2,77058 | 0,0055957   | 0,0325734   | yes |
| AN1342 | ChrVIII_A_nidulans_FGSC_A4:781191-782595   | WT_5hasex | WT_veg | OK | 66,5877  | 306,972 | 2,20478  | -4,63054 | 3,64711E-06 | 5,83381E-05 | yes |
| AN1344 | ChrVIII_A_nidulans_FGSC_A4:776444-778021   | WT_5hasex | WT_veg | OK | 31,3768  | 108,517 | 1,79015  | -3,59173 | 0,000328484 | 0,00304013  | yes |
| AN1348 | ChrVIII_A_nidulans_FGSC_A4:772047-772896   | WT_5hasex | WT_veg | OK | 80,1832  | 198,291 | 1,30624  | -2,64332 | 0,00820974  | 0,0444842   | yes |
| AN1350 | ChrVIII_A_nidulans_FGSC_A4:766239-766842   | WT_5hasex | WT_veg | OK | 31,1112  | 111,967 | 1,84757  | -3,26607 | 0,00109051  | 0,00843599  | yes |
| AN1354 | ChrVIII_A_nidulans_FGSC_A4:757332-759693   | WT_5hasex | WT_veg | OK | 13,6314  | 91,3092 | 2,74383  | -5,16894 | 2,35425E-07 | 5,02925E-06 | yes |
| AN1355 | ChrVIII_A_nidulans_FGSC_A4:755292-756651   | WT_5hasex | WT_veg | OK | 18,8803  | 57,5758 | 1,60859  | -2,91036 | 0,00361008  | 0,022817    | yes |
| AN1357 | ChrVIII_A_nidulans_FGSC_A4:750361-752626   | WT_5hasex | WT_veg | OK | 73,0313  | 305,404 | 2,06413  | -4,24347 | 0,000022009 | 0,000290069 | yes |
| AN1359 | ChrVIII_A_nidulans_FGSC_A4:743599-746479   | WT_5hasex | WT_veg | OK | 9,82266  | 26,6386 | 1,43933  | -2,7236  | 0,00645741  | 0,0367023   | yes |
| AN1361 | ChrVIII_A_nidulans_FGSC_A4:739952-742094   | WT_5hasex | WT_veg | OK | 11,2381  | 56,7845 | 2,33709  | -3,24031 | 0,00119399  | 0,00909018  | yes |
| AN1364 | ChrVIII_A_nidulans_FGSC_A4:736423-739616   | WT_5hasex | WT_veg | OK | 39,3633  | 227,939 | 2,53373  | -4,46647 | 7,95192E-06 | 0,000117214 | yes |
| AN1365 | ChrVIII_A_nidulans_FGSC_A4:735061-735878   | WT_5hasex | WT_veg | OK | 112,6    | 297,089 | 1,39968  | -2,76957 | 0,00561295  | 0,032663    | yes |
| AN1366 | ChrVIII_A_nidulans_FGSC_A4:732540-734863   | WT_5hasex | WT_veg | OK | 21,8851  | 72,6888 | 1,73178  | -3,49155 | 0,000480224 | 0,00420463  | yes |
| AN1378 | ChrVIII_A_nidulans_FGSC_A4:690136-691514   | WT_5hasex | WT_veg | OK | 2223,89  | 414,849 | -2,42242 | 3,49168  | 0,000479986 | 0,00420395  | yes |
| AN1391 | ChrVIII_A_nidulans_FGSC_A4:655702-658835   | WT_5hasex | WT_veg | OK | 18,7386  | 54,2758 | 1,5343   | -3,13809 | 0,00170053  | 0,0121919   | yes |
| AN1393 | ChrVIII_A_nidulans_FGSC_A4:653641-654217   | WT_5hasex | WT_veg | OK | 83,2996  | 323,598 | 1,95782  | -3,88094 | 0,000104053 | 0,00113572  | yes |
| AN1404 | ChrVIII_A_nidulans_FGSC_A4:616201-617573   | WT_5hasex | WT_veg | OK | 41,4199  | 106,065 | 1,35655  | -2,72379 | 0,00645374  | 0,0367023   | yes |
| AN1411 | ChrVII_A_nidulans_FGSC_A4:702310-702889    | WT_5hasex | WT_veg | OK | 46,3409  | 153,156 | 1,72465  | -2,95851 | 0,00309129  | 0,0200408   | yes |
| AN1412 | ChrVII_A_nidulans_FGSC_A4:702996-704913    | WT_5hasex | WT_veg | OK | 29,847   | 77,1333 | 1,36977  | -2,75284 | 0,00590813  | 0,0340554   | yes |
| AN1421 | ChrVII_A_nidulans_FGSC_A4:731303-732944    | WT_5hasex | WT_veg | OK | 6,64204  | 47,5423 | 2,83951  | -4,61395 | 3,95079E-06 | 6,26033E-05 | yes |
| AN1423 | ChrVII_A_nidulans_FGSC_A4:735177-736785    | WT_5hasex | WT_veg | OK | 13,301   | 55,9674 | 2,07305  | -3,60303 | 0,000314532 | 0,00293515  | yes |
| AN1426 | ChrVII_A_nidulans_FGSC_A4:747536-749625    | WT_5hasex | WT_veg | OK | 135,722  | 43,1237 | -1,6541  | 2,64355  | 0,00820428  | 0,0444592   | yes |
| AN1430 | ChrVII_A_nidulans_FGSC_A4:757763-759372    | WT_5hasex | WT_veg | OK | 59,6504  | 143,91  | 1,27056  | -2,65881 | 0,00784163  | 0,0428977   | yes |
| AN1434 | ChrVII_A_nidulans_FGSC_A4:765967-768761    | WT_5hasex | WT_veg | OK | 10,3952  | 125,581 | 3,59462  | -6,82758 | 8,63576E-12 | 4,15166E-10 | yes |
| AN1438 | ChrVII_A_nidulans_FGSC_A4:781905-783674    | WT_5hasex | WT_veg | OK | 31,4841  | 136,54  | 2,11663  | -3,78262 | 0,000155189 | 0,0016002   | yes |
| AN1448 | ChrVII_A_nidulans_FGSC_A4:809435-811549    | WT_5hasex | WT_veg | OK | 19,8074  | 65,7294 | 1,7305   | -3,47917 | 0,000502977 | 0,0043746   | yes |
| AN1452 | ChrVII_A_nidulans_FGSC_A4:819518-821241    | WT_5hasex | WT_veg | OK | 16,822   | 91,3971 | 2,4418   | -4,62141 | 3,8114E-06  | 6,06515E-05 | yes |
| AN1467 | ChrVII_A_nidulans_FGSC_A4:873483-875185    | WT_5hasex | WT_veg | OK | 20,7011  | 251,018 | 3,60001  | -7,02618 | 2,12275E-12 | 1,12157E-10 | yes |

## Supplementary table 2

|        |                                           |           |        |    |         |         |          |          |             |             |     |
|--------|-------------------------------------------|-----------|--------|----|---------|---------|----------|----------|-------------|-------------|-----|
| AN1468 | ChrVII_A_nidulans_FGSC_A4:875825-877581   | WT_5hasex | WT_veg | OK | 21,8062 | 112,267 | 2,36412  | -4,6342  | 3,58321E-06 | 5,75092E-05 | yes |
| AN1469 | ChrVII_A_nidulans_FGSC_A4:877974-878814   | WT_5hasex | WT_veg | OK | 85,6008 | 298,41  | 1,8016   | -3,72796 | 0,000193036 | 0,00193301  | yes |
| AN1474 | ChrVII_A_nidulans_FGSC_A4:890324-891557   | WT_5hasex | WT_veg | OK | 7,75106 | 47,0378 | 2,60136  | -4,00572 | 6,18285E-05 | 0,000721589 | yes |
| AN1480 | ChrVII_A_nidulans_FGSC_A4:918483-919251   | WT_5hasex | WT_veg | OK | 22,264  | 94,7046 | 2,08872  | -3,4817  | 0,000498244 | 0,00434065  | yes |
| AN1500 | ChrVII_A_nidulans_FGSC_A4:981315-983757   | WT_5hasex | WT_veg | OK | 43,2033 | 333,869 | 2,95007  | -6,12526 | 9,05376E-10 | 3,23847E-08 | yes |
| AN1514 | ChrVII_A_nidulans_FGSC_A4:1025428-1027168 | WT_5hasex | WT_veg | OK | 15,4555 | 67,0238 | 2,11656  | -3,84112 | 0,000122473 | 0,00131137  | yes |
| AN1517 | ChrVII_A_nidulans_FGSC_A4:1045668-1047220 | WT_5hasex | WT_veg | OK | 16,5182 | 65,4776 | 1,98695  | -3,66621 | 0,000246173 | 0,0023827   | yes |
| AN1518 | ChrVII_A_nidulans_FGSC_A4:1047403-1051430 | WT_5hasex | WT_veg | OK | 44,9385 | 174,88  | 1,96034  | -4,03044 | 5,56721E-05 | 0,000657344 | yes |
| AN1520 | ChrVII_A_nidulans_FGSC_A4:1056691-1058706 | WT_5hasex | WT_veg | OK | 20,6    | 57,4056 | 1,47855  | -2,92777 | 0,00341399  | 0,0218038   | yes |
| AN1524 | ChrVII_A_nidulans_FGSC_A4:1065761-1067258 | WT_5hasex | WT_veg | OK | 57,4116 | 195,598 | 1,76848  | -3,46742 | 0,000525471 | 0,0045401   | yes |
| AN1527 | ChrVII_A_nidulans_FGSC_A4:1069649-1070576 | WT_5hasex | WT_veg | OK | 94,0659 | 417,912 | 2,15146  | -4,45032 | 8,57434E-06 | 0,000125436 | yes |
| AN1533 | ChrVII_A_nidulans_FGSC_A4:1081260-1084203 | WT_5hasex | WT_veg | OK | 9,45193 | 46,6972 | 2,30465  | -3,98792 | 6,66563E-05 | 0,000770045 | yes |
| AN1538 | ChrVII_A_nidulans_FGSC_A4:1100109-1101380 | WT_5hasex | WT_veg | OK | 42,3845 | 157,039 | 1,88952  | -3,80353 | 0,00014265  | 0,00149026  | yes |
| AN1561 | ChrVII_A_nidulans_FGSC_A4:1178205-1178930 | WT_5hasex | WT_veg | OK | 40,6188 | 133,12  | 1,71251  | -3,12231 | 0,00179436  | 0,0127513   | yes |
| AN1563 | ChrVII_A_nidulans_FGSC_A4:1186320-1187620 | WT_5hasex | WT_veg | OK | 24,557  | 73,5525 | 1,58264  | -2,67895 | 0,00738536  | 0,040871    | yes |
| AN1578 | ChrVII_A_nidulans_FGSC_A4:1234012-1236860 | WT_5hasex | WT_veg | OK | 11,0451 | 31,8161 | 1,52634  | -2,89777 | 0,00375823  | 0,0235882   | yes |
| AN1579 | ChrVII_A_nidulans_FGSC_A4:1239132-1240691 | WT_5hasex | WT_veg | OK | 1,06071 | 6,24402 | 2,55744  | -2,88947 | 0,00385898  | 0,0240851   | yes |
| AN1586 | ChrVII_A_nidulans_FGSC_A4:1259975-1262157 | WT_5hasex | WT_veg | OK | 3,37609 | 13,8852 | 2,04012  | -2,66284 | 0,00774849  | 0,0424946   | yes |
| AN1593 | ChrVII_A_nidulans_FGSC_A4:1282755-1284065 | WT_5hasex | WT_veg | OK | 12,6888 | 2,71733 | -2,2233  | 3,05001  | 0,00228837  | 0,0156064   | yes |
| AN1607 | ChrVII_A_nidulans_FGSC_A4:1330933-1334130 | WT_5hasex | WT_veg | OK | 51,4035 | 172,496 | 1,74662  | -3,49128 | 0,000480712 | 0,00420749  | yes |
| AN1610 | ChrVII_A_nidulans_FGSC_A4:1346095-1347242 | WT_5hasex | WT_veg | OK | 22,9476 | 79,2664 | 1,78837  | -3,27559 | 0,00105441  | 0,00820268  | yes |
| AN1621 | ChrVII_A_nidulans_FGSC_A4:1379569-1380184 | WT_5hasex | WT_veg | OK | 39,7936 | 166,021 | 2,06076  | -3,77874 | 0,000157622 | 0,0016221   | yes |
| AN1625 | ChrVII_A_nidulans_FGSC_A4:1396317-1398642 | WT_5hasex | WT_veg | OK | 18,3481 | 125,859 | 2,77811  | -5,46525 | 4,62243E-08 | 1,15841E-06 | yes |
| AN1640 | ChrVII_A_nidulans_FGSC_A4:1445840-1448327 | WT_5hasex | WT_veg | OK | 4,26011 | 20,5987 | 2,27359  | -3,32995 | 0,000868626 | 0,00697697  | yes |
| AN1646 | ChrVII_A_nidulans_FGSC_A4:1467425-1471573 | WT_5hasex | WT_veg | OK | 123,658 | 45,6939 | -1,43628 | 2,82515  | 0,00472587  | 0,0284388   | yes |
| AN1647 | ChrVII_A_nidulans_FGSC_A4:1472952-1474294 | WT_5hasex | WT_veg | OK | 51,346  | 16,6154 | -1,62773 | 3,1165   | 0,00183015  | 0,0129582   | yes |
| AN1662 | ChrVII_A_nidulans_FGSC_A4:1541113-1541869 | WT_5hasex | WT_veg | OK | 107,795 | 638,328 | 2,56601  | -5,29291 | 1,20382E-07 | 2,7475E-06  | yes |
| AN1666 | ChrVII_A_nidulans_FGSC_A4:1553756-1556325 | WT_5hasex | WT_veg | OK | 34,5578 | 306,509 | 3,14885  | -6,26695 | 3,68194E-10 | 1,39914E-08 | yes |
| AN1667 | ChrVII_A_nidulans_FGSC_A4:1556578-1557527 | WT_5hasex | WT_veg | OK | 88,5929 | 310,056 | 1,80727  | -3,685   | 0,000228701 | 0,00223673  | yes |
| AN1669 | ChrVII_A_nidulans_FGSC_A4:1559119-1560987 | WT_5hasex | WT_veg | OK | 11,3252 | 55,2464 | 2,28634  | -4,13908 | 3,48707E-05 | 0,000437361 | yes |
| AN1677 | ChrVII_A_nidulans_FGSC_A4:1585069-1586506 | WT_5hasex | WT_veg | OK | 165,321 | 857,87  | 2,37549  | -4,62789 | 3,69417E-06 | 5,89471E-05 | yes |
| AN1682 | ChrVII_A_nidulans_FGSC_A4:1600070-1600901 | WT_5hasex | WT_veg | OK | 76,793  | 321,369 | 2,06518  | -4,22957 | 2,34135E-05 | 0,000306576 | yes |
| AN1709 | ChrVII_A_nidulans_FGSC_A4:1682441-1684209 | WT_5hasex | WT_veg | OK | 40,415  | 129,99  | 1,68544  | -3,38961 | 0,000699911 | 0,00579503  | yes |
| AN1711 | ChrVII_A_nidulans_FGSC_A4:1688017-1689649 | WT_5hasex | WT_veg | OK | 59,5851 | 221,003 | 1,89104  | -3,86898 | 0,00010929  | 0,00118645  | yes |
| AN1714 | ChrVII_A_nidulans_FGSC_A4:1695241-1696003 | WT_5hasex | WT_veg | OK | 30,9785 | 84,7107 | 1,45128  | -2,63566 | 0,00839733  | 0,0452946   | yes |
| AN1736 | ChrVII_A_nidulans_FGSC_A4:1752175-1754179 | WT_5hasex | WT_veg | OK | 4,36424 | 14,974  | 1,77865  | -2,78375 | 0,00537352  | 0,0314864   | yes |
| AN1745 | ChrVII_A_nidulans_FGSC_A4:1774497-1776118 | WT_5hasex | WT_veg | OK | 39,3856 | 110,39  | 1,48687  | -3,06094 | 0,00220643  | 0,0151674   | yes |
| AN1747 | ChrVII_A_nidulans_FGSC_A4:1784748-1785622 | WT_5hasex | WT_veg | OK | 32,3355 | 210,555 | 2,703    | -4,68581 | 2,78852E-06 | 4,60379E-05 | yes |
| AN1750 | ChrVII_A_nidulans_FGSC_A4:1793014-1795427 | WT_5hasex | WT_veg | OK | 9,07116 | 38,4988 | 2,08545  | -3,71983 | 0,00019936  | 0,00198692  | yes |
| AN1753 | ChrVII_A_nidulans_FGSC_A4:1800898-1802584 | WT_5hasex | WT_veg | OK | 119,421 | 326,116 | 1,44932  | -2,82211 | 0,0047709   | 0,0286702   | yes |
| AN1754 | ChrVII_A_nidulans_FGSC_A4:1800898-1802584 | WT_5hasex | WT_veg | OK | 257,759 | 1872,18 | 2,86063  | -5,2574  | 1,46107E-07 | 3,28033E-06 | yes |
| AN1756 | ChrVII_A_nidulans_FGSC_A4:1806184-1806520 | WT_5hasex | WT_veg | OK | 75,6041 | 353,371 | 2,22465  | -3,49192 | 0,000479567 | 0,00420239  | yes |
| AN1759 | ChrVII_A_nidulans_FGSC_A4:1811360-1812303 | WT_5hasex | WT_veg | OK | 24,8847 | 79,9071 | 1,68306  | -3,11746 | 0,00182415  | 0,0129174   | yes |
| AN1761 | ChrVII_A_nidulans_FGSC_A4:1814695-1816428 | WT_5hasex | WT_veg | OK | 615,288 | 1748,07 | 1,50643  | -2,71864 | 0,00655518  | 0,0371839   | yes |
| AN1764 | ChrVII_A_nidulans_FGSC_A4:1821289-1822355 | WT_5hasex | WT_veg | OK | 8,29563 | 36,7844 | 2,14867  | -3,24248 | 0,00118494  | 0,00903398  | yes |
| AN1795 | ChrVII_A_nidulans_FGSC_A4:1910728-1912771 | WT_5hasex | WT_veg | OK | 91,9809 | 457,059 | 2,31298  | -4,52153 | 6,13941E-06 | 9,30356E-05 | yes |

## Supplementary table 2

|        |                                           |           |        |    |         |         |               |               |             |             |     |
|--------|-------------------------------------------|-----------|--------|----|---------|---------|---------------|---------------|-------------|-------------|-----|
| AN1797 | ChrVII_A_nidulans_FGSC_A4:1916878-1918939 | WT_5hasex | WT_veg | OK | 20,5942 | 76,2901 | 1,88926       | -3,66959      | 0,000242937 | 0,00235486  | yes |
| AN1801 | ChrVII_A_nidulans_FGSC_A4:1932408-1933321 | WT_5hasex | WT_veg | OK | 167,577 | 819,709 | 2,29029       | -4,24566      | 2,17947E-05 | 0,000287491 | yes |
| AN1803 | ChrVII_A_nidulans_FGSC_A4:1939409-1939934 | WT_5hasex | WT_veg | OK | 21,2006 | 0       | -1.79769e+308 | -1.79769e+308 | 0,00687768  | 0,0385872   | yes |
| AN1813 | ChrVII_A_nidulans_FGSC_A4:1967259-1968003 | WT_5hasex | WT_veg | OK | 23,6617 | 4,20543 | -2,49223      | 2,98286       | 0,00285565  | 0,018474    | yes |
| AN1819 | ChrVII_A_nidulans_FGSC_A4:1988317-1989247 | WT_5hasex | WT_veg | OK | 1,38784 | 9,77747 | 2,81662       | -3,34546      | 0,00082146  | 0,0066419   | yes |
| AN1822 | ChrVII_A_nidulans_FGSC_A4:1995308-1996237 | WT_5hasex | WT_veg | OK | 4,60555 | 26,0559 | 2,50016       | -3,23328      | 0,00122377  | 0,00927012  | yes |
| AN1825 | ChrVII_A_nidulans_FGSC_A4:2001917-2003538 | WT_5hasex | WT_veg | OK | 19,3119 | 6,15671 | -1,64926      | 2,61723       | 0,00886463  | 0,0473954   | yes |
| AN1826 | ChrVII_A_nidulans_FGSC_A4:2004470-2005496 | WT_5hasex | WT_veg | OK | 43,0102 | 3,42085 | -3,65225      | 4,77649       | 1,78377E-06 | 3,09514E-05 | yes |
| AN1839 | ChrVII_A_nidulans_FGSC_A4:2032840-2033833 | WT_5hasex | WT_veg | OK | 2,49298 | 13,3265 | 2,41835       | -2,93651      | 0,00331929  | 0,0212924   | yes |
| AN1842 | ChrVII_A_nidulans_FGSC_A4:2039911-2040706 | WT_5hasex | WT_veg | OK | 27,5336 | 84,6541 | 1,62039       | -2,88827      | 0,00387362  | 0,0241621   | yes |
| AN1854 | ChrVII_A_nidulans_FGSC_A4:2071765-2072858 | WT_5hasex | WT_veg | OK | 48,2159 | 129,534 | 1,42575       | -2,82176      | 0,0047761   | 0,0286917   | yes |
| AN1856 | ChrVII_A_nidulans_FGSC_A4:2079059-2081525 | WT_5hasex | WT_veg | OK | 6,93125 | 22,9083 | 1,72468       | -3,00337      | 0,00267012  | 0,0177383   | yes |
| AN1859 | ChrVII_A_nidulans_FGSC_A4:2086859-2088307 | WT_5hasex | WT_veg | OK | 52,1311 | 199,322 | 1,93489       | -4,03872      | 5,37437E-05 | 0,000637599 | yes |
| AN1871 | ChrVII_A_nidulans_FGSC_A4:2109653-2111491 | WT_5hasex | WT_veg | OK | 15,925  | 48,503  | 1,60678       | -2,91074      | 0,00360575  | 0,0228006   | yes |
| AN1873 | ChrVII_A_nidulans_FGSC_A4:2115111-2117101 | WT_5hasex | WT_veg | OK | 105,926 | 290,362 | 1,4548        | -2,99692      | 0,00272726  | 0,0180424   | yes |
| AN1875 | ChrVII_A_nidulans_FGSC_A4:2123689-2125123 | WT_5hasex | WT_veg | OK | 43,1182 | 154,167 | 1,83813       | -3,76952      | 0,000163559 | 0,00167628  | yes |
| AN1882 | ChrVII_A_nidulans_FGSC_A4:2150871-2152368 | WT_5hasex | WT_veg | OK | 66,6458 | 404,107 | 2,60015       | -5,10233      | 3,355E-07   | 6,93251E-06 | yes |
| AN1883 | ChrVII_A_nidulans_FGSC_A4:2152993-2154902 | WT_5hasex | WT_veg | OK | 229,718 | 596,914 | 1,37766       | -2,73253      | 0,00628506  | 0,0358924   | yes |
| AN1888 | ChrVII_A_nidulans_FGSC_A4:2162181-2163092 | WT_5hasex | WT_veg | OK | 1,04318 | 7,27836 | 2,80263       | -3,01158      | 0,00259893  | 0,0173468   | yes |
| AN1892 | ChrVII_A_nidulans_FGSC_A4:2171869-2173166 | WT_5hasex | WT_veg | OK | 155,04  | 1090,54 | 2,81434       | -5,61892      | 1,92157E-08 | 5,22273E-07 | yes |
| AN1893 | ChrVII_A_nidulans_FGSC_A4:2175079-2177634 | WT_5hasex | WT_veg | OK | 53,7415 | 11,6374 | -2,20726      | 4,42888       | 9,47217E-06 | 0,000137078 | yes |
| AN1898 | ChrVII_A_nidulans_FGSC_A4:2186943-2187751 | WT_5hasex | WT_veg | OK | 33,1429 | 98,2722 | 1,56808       | -2,89409      | 0,0038026   | 0,023824    | yes |
| AN1902 | ChrVII_A_nidulans_FGSC_A4:2201084-2203845 | WT_5hasex | WT_veg | OK | 41,7808 | 204,671 | 2,2924        | -4,78463      | 1,71305E-06 | 2,98825E-05 | yes |
| AN1908 | ChrVII_A_nidulans_FGSC_A4:2221159-2225064 | WT_5hasex | WT_veg | OK | 13,1895 | 76,8364 | 2,54239       | -5,0211       | 5,13757E-07 | 1,01096E-05 | yes |
| AN1924 | ChrVII_A_nidulans_FGSC_A4:2273329-2275347 | WT_5hasex | WT_veg | OK | 108,393 | 269,516 | 1,31409       | -2,59638      | 0,00942126  | 0,0497023   | yes |
| AN1926 | ChrVII_A_nidulans_FGSC_A4:2278892-2280132 | WT_5hasex | WT_veg | OK | 14,6695 | 87,5014 | 2,57649       | -3,88073      | 0,000104141 | 0,00113621  | yes |
| AN1927 | ChrVII_A_nidulans_FGSC_A4:2282573-2285560 | WT_5hasex | WT_veg | OK | 16,3874 | 53,5572 | 1,70849       | -3,43321      | 0,000596489 | 0,0050619   | yes |
| AN1935 | ChrVII_A_nidulans_FGSC_A4:2308793-2310827 | WT_5hasex | WT_veg | OK | 49,6397 | 288,428 | 2,53864       | -5,1636       | 2,42241E-07 | 5,16223E-06 | yes |
| AN1936 | ChrVII_A_nidulans_FGSC_A4:2311291-2311988 | WT_5hasex | WT_veg | OK | 50,0829 | 383,081 | 2,93526       | -5,48016      | 4,2495E-08  | 1,07265E-06 | yes |
| AN1939 | ChrVII_A_nidulans_FGSC_A4:2321137-2324343 | WT_5hasex | WT_veg | OK | 104,374 | 335,204 | 1,68328       | -3,29448      | 0,000986048 | 0,00775723  | yes |
| AN1941 | ChrVII_A_nidulans_FGSC_A4:2332402-2333217 | WT_5hasex | WT_veg | OK | 398,074 | 34,7536 | -3,5178       | 5,10022       | 3,39257E-07 | 7,00462E-06 | yes |
| AN1949 | ChrVII_A_nidulans_FGSC_A4:2351860-2354022 | WT_5hasex | WT_veg | OK | 30,2292 | 240,303 | 2,99084       | -6,08275      | 1,18137E-09 | 4,12158E-08 | yes |
| AN1951 | ChrVII_A_nidulans_FGSC_A4:2360812-2362113 | WT_5hasex | WT_veg | OK | 34,935  | 90,9367 | 1,38019       | -2,63428      | 0,0084316   | 0,0454747   | yes |
| AN1952 | ChrVII_A_nidulans_FGSC_A4:2364928-2366127 | WT_5hasex | WT_veg | OK | 60,585  | 379,518 | 2,64714       | -5,00431      | 5,60633E-07 | 1,09376E-05 | yes |
| AN1954 | ChrVII_A_nidulans_FGSC_A4:2369981-2371354 | WT_5hasex | WT_veg | OK | 59,5291 | 180,522 | 1,6005        | -3,30677      | 0,00094379  | 0,00749103  | yes |
| AN1957 | ChrVII_A_nidulans_FGSC_A4:2380045-2381596 | WT_5hasex | WT_veg | OK | 7,97399 | 28,5204 | 1,83862       | -3,0509       | 0,00228158  | 0,0155697   | yes |
| AN1965 | ChrVII_A_nidulans_FGSC_A4:2406773-2408348 | WT_5hasex | WT_veg | OK | 71,0051 | 308,39  | 2,11876       | -4,32839      | 1,50204E-05 | 0,000207361 | yes |
| AN1969 | ChrVII_A_nidulans_FGSC_A4:2428819-2429905 | WT_5hasex | WT_veg | OK | 9,64933 | 41,9669 | 2,12075       | -2,9874       | 0,00281359  | 0,0185223   | yes |
| AN1971 | ChrVII_A_nidulans_FGSC_A4:2431144-2433001 | WT_5hasex | WT_veg | OK | 55,7332 | 177,215 | 1,66889       | -3,47397      | 0,000512812 | 0,00444981  | yes |
| AN1976 | ChrVII_A_nidulans_FGSC_A4:2442967-2444786 | WT_5hasex | WT_veg | OK | 20,7807 | 54,7001 | 1,3963        | -2,6366       | 0,00837406  | 0,0452016   | yes |
| AN1983 | ChrVII_A_nidulans_FGSC_A4:2457387-2460326 | WT_5hasex | WT_veg | OK | 16,8432 | 93,4729 | 2,47238       | -4,82682      | 1,3873E-06  | 2,46432E-05 | yes |
| AN1987 | ChrVII_A_nidulans_FGSC_A4:2469119-2470554 | WT_5hasex | WT_veg | OK | 15,5238 | 69,0427 | 2,153         | -3,93959      | 8,16201E-05 | 0,000917823 | yes |
| AN1990 | ChrVII_A_nidulans_FGSC_A4:2476499-2478711 | WT_5hasex | WT_veg | OK | 130,631 | 783,033 | 2,58358       | -4,84453      | 1,26915E-06 | 2,27526E-05 | yes |
| AN1997 | ChrVII_A_nidulans_FGSC_A4:2502495-2503937 | WT_5hasex | WT_veg | OK | 24,6385 | 201,912 | 3,03474       | -5,93293      | 2,97581E-09 | 9,53371E-08 | yes |
| AN2010 | ChrVII_A_nidulans_FGSC_A4:2551148-2552218 | WT_5hasex | WT_veg | OK | 112,164 | 38,8969 | -1,52788      | 3,00205       | 0,00268171  | 0,0177964   | yes |
| AN2011 | ChrVII_A_nidulans_FGSC_A4:2553807-2558874 | WT_5hasex | WT_veg | OK | 13,0795 | 44,0838 | 1,75294       | -3,64904      | 0,000263225 | 0,00252814  | yes |

## Supplementary table 2

|        |                                           |           |        |    |          |          |          |          |             |             |     |
|--------|-------------------------------------------|-----------|--------|----|----------|----------|----------|----------|-------------|-------------|-----|
| AN2013 | ChrVII_A_nidulans_FGSC_A4:2565192-2566447 | WT_5hasex | WT_veg | OK | 56,5082  | 248,843  | 2,1387   | -4,27074 | 1,94825E-05 | 0,000260439 | yes |
| AN2019 | ChrVII_A_nidulans_FGSC_A4:2582709-2583183 | WT_5hasex | WT_veg | OK | 10,4209  | 93,5296  | 3,16595  | -4,47928 | 7,48942E-06 | 0,000111179 | yes |
| AN2022 | ChrVII_A_nidulans_FGSC_A4:2607674-2609439 | WT_5hasex | WT_veg | OK | 27,4578  | 157,121  | 2,51658  | -4,78787 | 1,68559E-06 | 2,94624E-05 | yes |
| AN2023 | ChrVII_A_nidulans_FGSC_A4:2610650-2611960 | WT_5hasex | WT_veg | OK | 37,8554  | 228,768  | 2,59531  | -4,87903 | 1,06607E-06 | 1,94243E-05 | yes |
| AN2029 | ChrVII_A_nidulans_FGSC_A4:2626344-2627879 | WT_5hasex | WT_veg | OK | 47,1677  | 125,41   | 1,41078  | -2,72253 | 0,00647844  | 0,0368003   | yes |
| AN2030 | ChrVII_A_nidulans_FGSC_A4:2638096-2638772 | WT_5hasex | WT_veg | OK | 89,7591  | 13,7381  | -2,70788 | 4,88997  | 1,00851E-06 | 1,84526E-05 | yes |
| AN2031 | ChrVII_A_nidulans_FGSC_A4:2639262-2640105 | WT_5hasex | WT_veg | OK | 14,4274  | 1,99947  | -2,85112 | 2,92639  | 0,00342916  | 0,0218793   | yes |
| AN2032 | ChrVII_A_nidulans_FGSC_A4:2640607-2647359 | WT_5hasex | WT_veg | OK | 2,08645  | 0,403534 | -2,37029 | 3,0029   | 0,00267424  | 0,017755    | yes |
| AN2033 | ChrVII_A_nidulans_FGSC_A4:2647940-2649248 | WT_5hasex | WT_veg | OK | 39,104   | 3,65956  | -3,41758 | 5,53647  | 3,08631E-08 | 8,03821E-07 | yes |
| AN2034 | ChrVII_A_nidulans_FGSC_A4:2649537-2650119 | WT_5hasex | WT_veg | OK | 23,246   | 3,12416  | -2,89544 | 2,93025  | 0,00338688  | 0,0216491   | yes |
| AN2037 | ChrVII_A_nidulans_FGSC_A4:2663256-2664479 | WT_5hasex | WT_veg | OK | 371,147  | 41,4374  | -3,16299 | 5,54241  | 2,9833E-08  | 7,78928E-07 | yes |
| AN2038 | ChrVII_A_nidulans_FGSC_A4:2667020-2668412 | WT_5hasex | WT_veg | OK | 27,5408  | 3,89801  | -2,82076 | 4,74029  | 2,13411E-06 | 3,64509E-05 | yes |
| AN2055 | ChrVII_A_nidulans_FGSC_A4:2710375-2712565 | WT_5hasex | WT_veg | OK | 74,0506  | 416,651  | 2,49225  | -5,10107 | 3,37744E-07 | 6,97614E-06 | yes |
| AN2063 | ChrVII_A_nidulans_FGSC_A4:2730753-2733710 | WT_5hasex | WT_veg | OK | 74,5596  | 180,833  | 1,27819  | -2,6334  | 0,00845357  | 0,0455698   | yes |
| AN2064 | ChrVII_A_nidulans_FGSC_A4:2734447-2737626 | WT_5hasex | WT_veg | OK | 16,7536  | 66,7541  | 1,99439  | -3,70912 | 0,000207985 | 0,00206261  | yes |
| AN2067 | ChrVII_A_nidulans_FGSC_A4:2747062-2749760 | WT_5hasex | WT_veg | OK | 27,0532  | 80,9038  | 1,58041  | -3,19079 | 0,00141882  | 0,0104806   | yes |
| AN2068 | ChrVII_A_nidulans_FGSC_A4:2753420-2757730 | WT_5hasex | WT_veg | OK | 29,4763  | 72,2281  | 1,29301  | -2,69869 | 0,00696134  | 0,038944    | yes |
| AN2077 | ChrVII_A_nidulans_FGSC_A4:2787888-2790637 | WT_5hasex | WT_veg | OK | 6,16789  | 42,9764  | 2,80069  | -4,8224  | 1,41839E-06 | 2,51443E-05 | yes |
| AN2079 | ChrVII_A_nidulans_FGSC_A4:2796306-2796900 | WT_5hasex | WT_veg | OK | 36,3496  | 113,572  | 1,64359  | -2,89495 | 0,00379219  | 0,0237702   | yes |
| AN2080 | ChrVII_A_nidulans_FGSC_A4:2796967-2799469 | WT_5hasex | WT_veg | OK | 92,4362  | 248,592  | 1,42725  | -2,89325 | 0,00381274  | 0,0238647   | yes |
| AN2088 | ChrVII_A_nidulans_FGSC_A4:2822328-2828770 | WT_5hasex | WT_veg | OK | 12,2585  | 36,8725  | 1,58877  | -2,63614 | 0,00838563  | 0,0452454   | yes |
| AN2090 | ChrVII_A_nidulans_FGSC_A4:2833085-2835168 | WT_5hasex | WT_veg | OK | 21,0906  | 122,964  | 2,54356  | -5,14007 | 2,74634E-07 | 5,78897E-06 | yes |
| AN2091 | ChrVII_A_nidulans_FGSC_A4:2835182-2836839 | WT_5hasex | WT_veg | OK | 62,693   | 150,641  | 1,26474  | -2,62876 | 0,00856979  | 0,0460967   | yes |
| AN2098 | ChrVII_A_nidulans_FGSC_A4:2854526-2855178 | WT_5hasex | WT_veg | OK | 57,1893  | 196,975  | 1,7842   | -3,20624 | 0,0013448   | 0,0100385   | yes |
| AN2117 | ChrVII_A_nidulans_FGSC_A4:2915862-2916366 | WT_5hasex | WT_veg | OK | 0,846117 | 9,25863  | 3,45187  | -2,76129 | 0,00575734  | 0,0333772   | yes |
| AN2120 | ChrVII_A_nidulans_FGSC_A4:2925432-2929217 | WT_5hasex | WT_veg | OK | 37,0992  | 258,201  | 2,79903  | -5,54271 | 2,9783E-08  | 7,78399E-07 | yes |
| AN2146 | ChrVII_A_nidulans_FGSC_A4:3024624-3025719 | WT_5hasex | WT_veg | OK | 14,8501  | 89,7617  | 2,59562  | -4,38659 | 1,15141E-05 | 0,000162719 | yes |
| AN2157 | ChrVII_A_nidulans_FGSC_A4:3058687-3060403 | WT_5hasex | WT_veg | OK | 63,0294  | 327,959  | 2,37942  | -4,06194 | 4,86674E-05 | 0,00058479  | yes |
| AN2173 | ChrVII_A_nidulans_FGSC_A4:3099802-3102324 | WT_5hasex | WT_veg | OK | 36,893   | 105,351  | 1,51378  | -3,14776 | 0,00164527  | 0,0118672   | yes |
| AN2177 | ChrVII_A_nidulans_FGSC_A4:3115692-3117166 | WT_5hasex | WT_veg | OK | 32,4465  | 131,852  | 2,02278  | -3,46019 | 0,000539794 | 0,00464319  | yes |
| AN2181 | ChrVII_A_nidulans_FGSC_A4:3129583-3130233 | WT_5hasex | WT_veg | OK | 181,757  | 489,937  | 1,43058  | -2,90519 | 0,00367027  | 0,0231444   | yes |
| AN2187 | ChrVII_A_nidulans_FGSC_A4:3141674-3142494 | WT_5hasex | WT_veg | OK | 1,18287  | 7,88179  | 2,73624  | -2,95571 | 0,00311955  | 0,020204    | yes |
| AN2190 | ChrVII_A_nidulans_FGSC_A4:3146063-3147164 | WT_5hasex | WT_veg | OK | 17,644   | 49,8077  | 1,4972   | -2,65049 | 0,00803741  | 0,0437677   | yes |
| AN2194 | ChrVII_A_nidulans_FGSC_A4:3160475-3165486 | WT_5hasex | WT_veg | OK | 1,68844  | 7,82737  | 2,21284  | -3,03856 | 0,00237713  | 0,0161251   | yes |
| AN2199 | ChrVII_A_nidulans_FGSC_A4:3181310-3182630 | WT_5hasex | WT_veg | OK | 1,66742  | 11,2528  | 2,7546   | -3,0393  | 0,0023713   | 0,0160918   | yes |
| AN2205 | ChrVII_A_nidulans_FGSC_A4:3198153-3199030 | WT_5hasex | WT_veg | OK | 21,6548  | 92,8852  | 2,10077  | -3,53082 | 0,000414274 | 0,00370468  | yes |
| AN2208 | ChrVII_A_nidulans_FGSC_A4:3206281-3207658 | WT_5hasex | WT_veg | OK | 87,3574  | 982,121  | 3,4909   | -6,92159 | 4,46621E-12 | 2,26124E-10 | yes |
| AN2210 | ChrVII_A_nidulans_FGSC_A4:3210013-3212504 | WT_5hasex | WT_veg | OK | 96,3391  | 509,573  | 2,40309  | -4,79167 | 1,65403E-06 | 0,000028959 | yes |
| AN2219 | ChrVII_A_nidulans_FGSC_A4:3236436-3238514 | WT_5hasex | WT_veg | OK | 56,1023  | 190,493  | 1,7636   | -3,31971 | 0,000901118 | 0,00719933  | yes |
| AN2220 | ChrVII_A_nidulans_FGSC_A4:3239171-3239936 | WT_5hasex | WT_veg | OK | 4,3914   | 27,6508  | 2,65457  | -3,47179 | 0,000517002 | 0,00447875  | yes |
| AN2221 | ChrVII_A_nidulans_FGSC_A4:3240377-3241100 | WT_5hasex | WT_veg | OK | 1,94718  | 23,9843  | 3,62263  | -4,28374 | 1,83781E-05 | 0,000248401 | yes |
| AN2236 | ChrVII_A_nidulans_FGSC_A4:3285758-3287709 | WT_5hasex | WT_veg | OK | 23,6761  | 59,6219  | 1,33241  | -2,66809 | 0,00762838  | 0,0419677   | yes |
| AN2244 | ChrVII_A_nidulans_FGSC_A4:3304553-3306322 | WT_5hasex | WT_veg | OK | 57,0982  | 159,408  | 1,4812   | -3,05614 | 0,00224205  | 0,0153664   | yes |
| AN2245 | ChrVII_A_nidulans_FGSC_A4:3306476-3307859 | WT_5hasex | WT_veg | OK | 41,1471  | 134,166  | 1,70516  | -3,49312 | 0,000477403 | 0,00418622  | yes |
| AN2252 | ChrVII_A_nidulans_FGSC_A4:3334068-3334827 | WT_5hasex | WT_veg | OK | 7,01567  | 25,3531  | 1,85351  | -2,60868 | 0,0090892   | 0,0482957   | yes |
| AN2256 | ChrVII_A_nidulans_FGSC_A4:3349772-3352636 | WT_5hasex | WT_veg | OK | 4,35578  | 31,9929  | 2,87675  | -4,77919 | 1,76004E-06 | 3,06003E-05 | yes |



## Supplementary table 2

|        |                                           |           |        |    |          |         |          |          |             |             |     |
|--------|-------------------------------------------|-----------|--------|----|----------|---------|----------|----------|-------------|-------------|-----|
| AN2257 | ChrVII_A_nidulans_FGSC_A4:3353105-3354978 | WT_5hasex | WT_veg | OK | 34,5236  | 117,055 | 1,76153  | -3,4344  | 0,000593868 | 0,00504374  | yes |
| AN2258 | ChrVII_A_nidulans_FGSC_A4:3355119-3357744 | WT_5hasex | WT_veg | OK | 5,38859  | 17,8343 | 1,72668  | -2,92014 | 0,00349871  | 0,0222607   | yes |
| AN2261 | ChrVII_A_nidulans_FGSC_A4:3363227-3364948 | WT_5hasex | WT_veg | OK | 16,6291  | 55,6319 | 1,7422   | -3,24219 | 0,00118616  | 0,0090397   | yes |
| AN2262 | ChrVII_A_nidulans_FGSC_A4:3365098-3366836 | WT_5hasex | WT_veg | OK | 19,8282  | 109,563 | 2,46613  | -4,73494 | 2,19125E-06 | 3,72093E-05 | yes |
| AN2263 | ChrVII_A_nidulans_FGSC_A4:3367219-3369371 | WT_5hasex | WT_veg | OK | 16,982   | 130,053 | 2,93702  | -5,75033 | 8,9067E-09  | 2,60743E-07 | yes |
| AN2278 | ChrVII_A_nidulans_FGSC_A4:3418614-3423392 | WT_5hasex | WT_veg | OK | 39,6804  | 108,599 | 1,45251  | -2,94326 | 0,00324777  | 0,0208771   | yes |
| AN2283 | ChrVII_A_nidulans_FGSC_A4:3433293-3434931 | WT_5hasex | WT_veg | OK | 30,1867  | 247,684 | 3,03651  | -6,04261 | 1,51645E-09 | 5,15338E-08 | yes |
| AN2285 | ChrVII_A_nidulans_FGSC_A4:3438340-3443541 | WT_5hasex | WT_veg | OK | 20,6158  | 50,8713 | 1,3031   | -2,71419 | 0,00664379  | 0,0375564   | yes |
| AN2287 | ChrVII_A_nidulans_FGSC_A4:3447439-3449806 | WT_5hasex | WT_veg | OK | 451,783  | 167,969 | -1,42744 | 2,66181  | 0,00777225  | 0,0425893   | yes |
| AN2292 | ChrVII_A_nidulans_FGSC_A4:3466872-3467835 | WT_5hasex | WT_veg | OK | 20,5223  | 64,2973 | 1,64757  | -2,82835 | 0,00467883  | 0,0282093   | yes |
| AN2294 | ChrVII_A_nidulans_FGSC_A4:3470786-3472636 | WT_5hasex | WT_veg | OK | 15,3354  | 78,8378 | 2,36203  | -4,45451 | 8,40866E-06 | 0,000123219 | yes |
| AN2311 | ChrVII_A_nidulans_FGSC_A4:3519999-3522151 | WT_5hasex | WT_veg | OK | 118,157  | 452,639 | 1,93766  | -3,94767 | 7,89164E-05 | 0,000892014 | yes |
| AN2312 | ChrVII_A_nidulans_FGSC_A4:3523544-3524172 | WT_5hasex | WT_veg | OK | 120,859  | 584,793 | 2,27461  | -4,55295 | 5,28979E-06 | 8,14562E-05 | yes |
| AN2313 | ChrVII_A_nidulans_FGSC_A4:3524601-3526076 | WT_5hasex | WT_veg | OK | 50,4257  | 146,979 | 1,54338  | -3,19286 | 0,00140873  | 0,0104193   | yes |
| AN2314 | ChrVII_A_nidulans_FGSC_A4:3528856-3531636 | WT_5hasex | WT_veg | OK | 224,385  | 1140,06 | 2,34506  | -3,86119 | 0,000112835 | 0,00121963  | yes |
| AN2319 | ChrVII_A_nidulans_FGSC_A4:3544294-3546460 | WT_5hasex | WT_veg | OK | 347,535  | 43,8455 | -2,98666 | 4,87267  | 0,000001101 | 1,99843E-05 | yes |
| AN2326 | ChrVII_A_nidulans_FGSC_A4:3565747-3568841 | WT_5hasex | WT_veg | OK | 8,62522  | 34,4849 | 1,99933  | -3,16996 | 0,0015246   | 0,0111379   | yes |
| AN2332 | ChrVII_A_nidulans_FGSC_A4:3585628-3586918 | WT_5hasex | WT_veg | OK | 216,514  | 616,045 | 1,50858  | -2,9826  | 0,00285814  | 0,0187591   | yes |
| AN2335 | ChrVII_A_nidulans_FGSC_A4:3594077-3595555 | WT_5hasex | WT_veg | OK | 3,81716  | 14,9582 | 1,97036  | -2,8322  | 0,00462296  | 0,027935    | yes |
| AN2336 | ChrVII_A_nidulans_FGSC_A4:3596931-3598364 | WT_5hasex | WT_veg | OK | 175,415  | 23,2292 | -2,91676 | 5,3943   | 6,87902E-08 | 1,66194E-06 | yes |
| AN2358 | ChrVII_A_nidulans_FGSC_A4:3675781-3677565 | WT_5hasex | WT_veg | OK | 10,1067  | 95,8947 | 3,24613  | -5,08409 | 3,69384E-07 | 7,54932E-06 | yes |
| AN2367 | ChrVII_A_nidulans_FGSC_A4:3703225-3705043 | WT_5hasex | WT_veg | OK | 1,90251  | 15,3164 | 3,00911  | -4,04983 | 5,12548E-05 | 0,000611548 | yes |
| AN2373 | ChrVII_A_nidulans_FGSC_A4:3719050-3720952 | WT_5hasex | WT_veg | OK | 0,328993 | 6,28984 | 4,2569   | -3,9685  | 7,23252E-05 | 0,000826606 | yes |
| AN2384 | ChrVII_A_nidulans_FGSC_A4:3747452-3749475 | WT_5hasex | WT_veg | OK | 0,686648 | 7,24194 | 3,39873  | -3,50338 | 0,000459398 | 0,00405071  | yes |
| AN2404 | ChrVII_A_nidulans_FGSC_A4:3817953-3819255 | WT_5hasex | WT_veg | OK | 365,138  | 2327,71 | 2,6724   | -4,88565 | 1,03086E-06 | 1,88388E-05 | yes |
| AN2408 | ChrVII_A_nidulans_FGSC_A4:3831760-3834097 | WT_5hasex | WT_veg | OK | 7,79065  | 29,9639 | 1,94341  | -3,41045 | 0,000648551 | 0,00542984  | yes |
| AN2410 | ChrVII_A_nidulans_FGSC_A4:3840423-3842171 | WT_5hasex | WT_veg | OK | 55,5512  | 153,625 | 1,46752  | -3,06128 | 0,00220395  | 0,0151576   | yes |
| AN2415 | ChrVII_A_nidulans_FGSC_A4:3853854-3855096 | WT_5hasex | WT_veg | OK | 31,2082  | 169,48  | 2,44112  | -4,59049 | 4,4221E-06  | 6,92549E-05 | yes |
| AN2419 | ChrVII_A_nidulans_FGSC_A4:3863391-3865091 | WT_5hasex | WT_veg | OK | 86,699   | 222,885 | 1,36221  | -2,82646 | 0,00470651  | 0,0283418   | yes |
| AN2422 | ChrVII_A_nidulans_FGSC_A4:3883269-3885605 | WT_5hasex | WT_veg | OK | 4,56562  | 27,974  | 2,61521  | -4,12534 | 3,70191E-05 | 0,000460997 | yes |
| AN2423 | ChrVII_A_nidulans_FGSC_A4:3886476-3887301 | WT_5hasex | WT_veg | OK | 5,85784  | 32,4515 | 2,46985  | -3,31262 | 0,000924277 | 0,00735631  | yes |
| AN2451 | ChrVII_A_nidulans_FGSC_A4:3978779-3980204 | WT_5hasex | WT_veg | OK | 9,79411  | 49,7244 | 2,34397  | -3,82585 | 0,000130323 | 0,00138355  | yes |
| AN2455 | ChrVII_A_nidulans_FGSC_A4:3990102-3991715 | WT_5hasex | WT_veg | OK | 96,7924  | 271,378 | 1,48734  | -2,80029 | 0,00510566  | 0,0302415   | yes |
| AN2467 | ChrVII_A_nidulans_FGSC_A4:4039373-4041698 | WT_5hasex | WT_veg | OK | 36,2664  | 101,652 | 1,48693  | -3,10662 | 0,00189242  | 0,0133253   | yes |
| AN2473 | ChrVII_A_nidulans_FGSC_A4:4056917-4058131 | WT_5hasex | WT_veg | OK | 62,4829  | 165,833 | 1,4082   | -2,88651 | 0,00389546  | 0,0242671   | yes |
| AN2477 | ChrVII_A_nidulans_FGSC_A4:4066811-4069328 | WT_5hasex | WT_veg | OK | 214,996  | 881,744 | 2,03605  | -3,66177 | 0,000250481 | 0,00241859  | yes |
| AN2486 | ChrVII_A_nidulans_FGSC_A4:4102346-4103676 | WT_5hasex | WT_veg | OK | 12,0684  | 65,3426 | 2,43679  | -4,01059 | 6,05679E-05 | 0,000708354 | yes |
| AN2491 | ChrVII_A_nidulans_FGSC_A4:4118671-4121989 | WT_5hasex | WT_veg | OK | 15,8838  | 45,0838 | 1,50505  | -3,02788 | 0,00246278  | 0,0166008   | yes |
| AN2494 | ChrVII_A_nidulans_FGSC_A4:4130443-4132132 | WT_5hasex | WT_veg | OK | 26,5062  | 90,1338 | 1,76574  | -3,30838 | 0,000938366 | 0,00745446  | yes |
| AN2498 | ChrVII_A_nidulans_FGSC_A4:4142792-4144587 | WT_5hasex | WT_veg | OK | 99,6115  | 27,4524 | -1,85938 | 3,72213  | 0,000197551 | 0,00197182  | yes |
| AN2505 | ChrVII_A_nidulans_FGSC_A4:4167807-4169821 | WT_5hasex | WT_veg | OK | 27,8667  | 80,0125 | 1,52169  | -3,10426 | 0,00190756  | 0,0134138   | yes |
| AN2527 | ChrVII_A_nidulans_FGSC_A4:4237290-4239912 | WT_5hasex | WT_veg | OK | 18,2739  | 51,3586 | 1,49082  | -2,98347 | 0,00284997  | 0,0187195   | yes |
| AN2531 | ChrVII_A_nidulans_FGSC_A4:4247500-4249482 | WT_5hasex | WT_veg | OK | 27,6107  | 89,9528 | 1,70394  | -3,37475 | 0,000738838 | 0,00606463  | yes |
| AN2535 | ChrVII_A_nidulans_FGSC_A4:4260088-4260571 | WT_5hasex | WT_veg | OK | 193,385  | 1176,36 | 2,60479  | -5,40944 | 6,32213E-08 | 1,54362E-06 | yes |
| AN2554 | ChrVII_A_nidulans_FGSC_A4:4343886-4345610 | WT_5hasex | WT_veg | OK | 17,7269  | 56,2296 | 1,66539  | -2,84488 | 0,00444281  | 0,027068    | yes |
| AN2574 | ChrVII_A_nidulans_FGSC_A4:4402612-4404410 | WT_5hasex | WT_veg | OK | 11,5467  | 1,27766 | -3,1759  | 3,60963  | 0,000306634 | 0,00287395  | yes |

## Supplementary table 2

|        |                                           |           |        |    |          |          |          |          |             |             |     |
|--------|-------------------------------------------|-----------|--------|----|----------|----------|----------|----------|-------------|-------------|-----|
| AN2577 | ChrVII_A_nidulans_FGSC_A4:4410748-4411920 | WT_5hasex | WT_veg | OK | 16,479   | 48,0014  | 1,54245  | -2,63271 | 0,00847063  | 0,0456477   | yes |
| AN2581 | ChrVII_A_nidulans_FGSC_A4:4429218-4433463 | WT_5hasex | WT_veg | OK | 67,5597  | 209,334  | 1,63157  | -3,20266 | 0,00136163  | 0,0101271   | yes |
| AN2585 | ChrVII_A_nidulans_FGSC_A4:4443448-4445398 | WT_5hasex | WT_veg | OK | 34,8716  | 108,831  | 1,64197  | -2,7779  | 0,00547108  | 0,0319687   | yes |
| AN2587 | ChrVII_A_nidulans_FGSC_A4:4451266-4453096 | WT_5hasex | WT_veg | OK | 2,39538  | 10,8598  | 2,18067  | -2,94125 | 0,00326893  | 0,0210079   | yes |
| AN2592 | ChrVII_A_nidulans_FGSC_A4:4463337-4464471 | WT_5hasex | WT_veg | OK | 4,72121  | 22,5982  | 2,25898  | -3,24285 | 0,00118341  | 0,00902401  | yes |
| AN2594 | ChrVII_A_nidulans_FGSC_A4:4467450-4468164 | WT_5hasex | WT_veg | OK | 26,6688  | 108,336  | 2,02228  | -3,32231 | 0,000892761 | 0,00714673  | yes |
| AN2602 | ChrVII_A_nidulans_FGSC_A4:4491304-4493430 | WT_5hasex | WT_veg | OK | 3,19977  | 28,464   | 3,1531   | -4,12137 | 3,76624E-05 | 0,000467896 | yes |
| AN2604 | ChrVII_A_nidulans_FGSC_A4:4499595-4501100 | WT_5hasex | WT_veg | OK | 3,49207  | 19,1852  | 2,45784  | -2,84352 | 0,0044618   | 0,0271711   | yes |
| AN2628 | ChrVI_A_nidulans_FGSC_A4:3335693-3337086  | WT_5hasex | WT_veg | OK | 1,27056  | 7,51576  | 2,56445  | -2,96922 | 0,00298555  | 0,0194758   | yes |
| AN2640 | ChrVI_A_nidulans_FGSC_A4:3290104-3291205  | WT_5hasex | WT_veg | OK | 5,37181  | 38,7676  | 2,85137  | -4,27989 | 1,86988E-05 | 0,000251761 | yes |
| AN2646 | ChrVI_A_nidulans_FGSC_A4:3271027-3273468  | WT_5hasex | WT_veg | OK | 16,0759  | 86,2642  | 2,42386  | -4,10699 | 4,00852E-05 | 0,000494245 | yes |
| AN2648 | ChrVI_A_nidulans_FGSC_A4:3265819-3267761  | WT_5hasex | WT_veg | OK | 12,4311  | 53,9083  | 2,11655  | -3,6969  | 0,000218245 | 0,00214649  | yes |
| AN2649 | ChrVI_A_nidulans_FGSC_A4:3263209-3264476  | WT_5hasex | WT_veg | OK | 4,78981  | 27,3933  | 2,51578  | -3,50811 | 0,000451308 | 0,00399022  | yes |
| AN2660 | ChrVI_A_nidulans_FGSC_A4:3232903-3234421  | WT_5hasex | WT_veg | OK | 7,57758  | 25,1258  | 1,72936  | -2,83526 | 0,00457887  | 0,0277165   | yes |
| AN2668 | ChrVI_A_nidulans_FGSC_A4:3210424-3211730  | WT_5hasex | WT_veg | OK | 22,5055  | 71,9613  | 1,67695  | -3,03692 | 0,00239008  | 0,0162004   | yes |
| AN2675 | ChrVI_A_nidulans_FGSC_A4:3182226-3183840  | WT_5hasex | WT_veg | OK | 25,4405  | 7,75145  | -1,71459 | 2,94478  | 0,00323185  | 0,0208002   | yes |
| AN2695 | ChrVI_A_nidulans_FGSC_A4:3122444-3123476  | WT_5hasex | WT_veg | OK | 1,10189  | 8,74626  | 2,98868  | -3,15414 | 0,00160971  | 0,0116572   | yes |
| AN2702 | ChrVI_A_nidulans_FGSC_A4:3098243-3099223  | WT_5hasex | WT_veg | OK | 107,748  | 622,722  | 2,53092  | -4,68406 | 2,81254E-06 | 4,63759E-05 | yes |
| AN2704 | ChrVI_A_nidulans_FGSC_A4:3094382-3096119  | WT_5hasex | WT_veg | OK | 21,5885  | 6,9583   | -1,63345 | 2,92235  | 0,00347401  | 0,0221251   | yes |
| AN2718 | ChrVI_A_nidulans_FGSC_A4:3044308-3045251  | WT_5hasex | WT_veg | OK | 1,75593  | 10,1792  | 2,53532  | -2,70178 | 0,006897    | 0,0386666   | yes |
| AN2731 | ChrVI_A_nidulans_FGSC_A4:2989859-2992431  | WT_5hasex | WT_veg | OK | 164,474  | 585,083  | 1,83079  | -3,52731 | 0,000419801 | 0,00374441  | yes |
| AN2735 | ChrVI_A_nidulans_FGSC_A4:2981797-2983577  | WT_5hasex | WT_veg | OK | 20,3786  | 54,2486  | 1,41253  | -2,72031 | 0,00652203  | 0,0370119   | yes |
| AN2737 | ChrVI_A_nidulans_FGSC_A4:2975872-2978326  | WT_5hasex | WT_veg | OK | 27,8381  | 140,117  | 2,3315   | -4,82446 | 1,40383E-06 | 0,000024917 | yes |
| AN2743 | ChrVI_A_nidulans_FGSC_A4:2944031-2947428  | WT_5hasex | WT_veg | OK | 45,2522  | 114,258  | 1,33624  | -2,7833  | 0,00538093  | 0,0315228   | yes |
| AN2746 | ChrVI_A_nidulans_FGSC_A4:2938362-2939735  | WT_5hasex | WT_veg | OK | 22,0933  | 130,103  | 2,55798  | -4,65105 | 3,30245E-06 | 5,36272E-05 | yes |
| AN2747 | ChrVI_A_nidulans_FGSC_A4:2936205-2936921  | WT_5hasex | WT_veg | OK | 80,7063  | 517,603  | 2,68109  | -5,21448 | 1,84335E-07 | 4,03994E-06 | yes |
| AN2748 | ChrVI_A_nidulans_FGSC_A4:2934078-2935882  | WT_5hasex | WT_veg | OK | 6,3609   | 29,7927  | 2,22766  | -3,62968 | 0,000283774 | 0,00269049  | yes |
| AN2759 | ChrVI_A_nidulans_FGSC_A4:2888659-2890462  | WT_5hasex | WT_veg | OK | 102,966  | 270,805  | 1,39509  | -2,85661 | 0,00428192  | 0,0262496   | yes |
| AN2768 | ChrVI_A_nidulans_FGSC_A4:2860394-2861774  | WT_5hasex | WT_veg | OK | 72,0697  | 321,766  | 2,15855  | -4,38229 | 1,17437E-05 | 0,000165428 | yes |
| AN2769 | ChrVI_A_nidulans_FGSC_A4:2858133-2860004  | WT_5hasex | WT_veg | OK | 29,401   | 77,8887  | 1,40555  | -2,86427 | 0,00417973  | 0,0257147   | yes |
| AN2776 | ChrVI_A_nidulans_FGSC_A4:2836279-2837277  | WT_5hasex | WT_veg | OK | 48,5432  | 182,985  | 1,91438  | -3,70698 | 0,000209748 | 0,00207577  | yes |
| AN2792 | ChrVI_A_nidulans_FGSC_A4:2799055-2800163  | WT_5hasex | WT_veg | OK | 79,0685  | 327,431  | 2,05002  | -4,24736 | 2,16307E-05 | 0,00028573  | yes |
| AN2797 | ChrVI_A_nidulans_FGSC_A4:2780560-2785594  | WT_5hasex | WT_veg | OK | 2,73043  | 9,06553  | 1,73126  | -2,89379 | 0,00380621  | 0,0238381   | yes |
| AN2801 | ChrVI_A_nidulans_FGSC_A4:2770810-2772028  | WT_5hasex | WT_veg | OK | 40,6851  | 249,576  | 2,61691  | -4,95496 | 7,23452E-07 | 1,37656E-05 | yes |
| AN2808 | ChrVI_A_nidulans_FGSC_A4:2754259-2755888  | WT_5hasex | WT_veg | OK | 0,214378 | 11,3192  | 5,72247  | -4,22764 | 2,36152E-05 | 0,000308985 | yes |
| AN2810 | ChrVI_A_nidulans_FGSC_A4:2748564-2750905  | WT_5hasex | WT_veg | OK | 1,11665  | 4,95026  | 2,14833  | -2,78407 | 0,00536815  | 0,0314585   | yes |
| AN2815 | ChrVI_A_nidulans_FGSC_A4:2722201-2724085  | WT_5hasex | WT_veg | OK | 221,143  | 2027,52  | 3,19666  | -5,84266 | 5,13747E-09 | 1,57343E-07 | yes |
| AN2817 | ChrVI_A_nidulans_FGSC_A4:2719256-2719770  | WT_5hasex | WT_veg | OK | 4,074    | 30,7157  | 2,91446  | -3,25624 | 0,00112896  | 0,00868339  | yes |
| AN2818 | ChrVI_A_nidulans_FGSC_A4:2712425-2714545  | WT_5hasex | WT_veg | OK | 12,243   | 1,51153  | -3,01787 | 3,78626  | 0,00015293  | 0,00157971  | yes |
| AN2822 | ChrVI_A_nidulans_FGSC_A4:2687815-2689547  | WT_5hasex | WT_veg | OK | 59,6204  | 678,153  | 3,50773  | -7,11461 | 1,12221E-12 | 6,28272E-11 | yes |
| AN2823 | ChrVI_A_nidulans_FGSC_A4:2686463-2686987  | WT_5hasex | WT_veg | OK | 23,3181  | 160,959  | 2,78718  | -4,3406  | 1,42095E-05 | 0,00019709  | yes |
| AN2831 | ChrVI_A_nidulans_FGSC_A4:2657040-2658645  | WT_5hasex | WT_veg | OK | 8,37455  | 37,5397  | 2,16433  | -3,27729 | 0,0010481   | 0,00816696  | yes |
| AN2832 | ChrVI_A_nidulans_FGSC_A4:2653961-2654976  | WT_5hasex | WT_veg | OK | 1,20936  | 11,3373  | 3,22876  | -3,19737 | 0,00138687  | 0,0102851   | yes |
| AN2837 | ChrVI_A_nidulans_FGSC_A4:2640877-2642300  | WT_5hasex | WT_veg | OK | 8,50859  | 27,0316  | 1,66766  | -2,72629 | 0,00640504  | 0,0364585   | yes |
| AN2841 | ChrVI_A_nidulans_FGSC_A4:2629127-2630734  | WT_5hasex | WT_veg | OK | 12,5751  | 0,540246 | -4,54081 | 3,37674  | 0,000733499 | 0,00602741  | yes |
| AN2844 | ChrVI_A_nidulans_FGSC_A4:2622546-2623195  | WT_5hasex | WT_veg | OK | 817,823  | 61,2636  | -3,73869 | 7,14324  | 9,11493E-13 | 5,14699E-11 | yes |

## Supplementary table 2

|        |                                          |           |        |    |         |         |          |          |             |             |     |
|--------|------------------------------------------|-----------|--------|----|---------|---------|----------|----------|-------------|-------------|-----|
| AN2848 | ChrVI_A_nidulans_FGSC_A4:2614310-2615066 | WT_5hasex | WT_veg | OK | 116,784 | 389,478 | 1,73771  | -3,53081 | 0,000414286 | 0,00370468  | yes |
| AN2852 | ChrVI_A_nidulans_FGSC_A4:2602370-2605570 | WT_5hasex | WT_veg | OK | 24,8619 | 81,1195 | 1,70611  | -3,57727 | 0,000347202 | 0,00318587  | yes |
| AN2854 | ChrVI_A_nidulans_FGSC_A4:2596166-2598495 | WT_5hasex | WT_veg | OK | 27,8165 | 98,0237 | 1,81719  | -3,74025 | 0,000183834 | 0,00185362  | yes |
| AN2859 | ChrVI_A_nidulans_FGSC_A4:2582295-2583338 | WT_5hasex | WT_veg | OK | 8,38356 | 34,7269 | 2,05042  | -3,04708 | 0,00231078  | 0,0157409   | yes |
| AN2860 | ChrVI_A_nidulans_FGSC_A4:2580313-2581623 | WT_5hasex | WT_veg | OK | 14,1545 | 41,426  | 1,54928  | -2,61251 | 0,00898809  | 0,0479286   | yes |
| AN2861 | ChrVI_A_nidulans_FGSC_A4:2577409-2579430 | WT_5hasex | WT_veg | OK | 14,1408 | 194,418 | 3,78123  | -7,21096 | 5,55556E-13 | 3,22752E-11 | yes |
| AN2862 | ChrVI_A_nidulans_FGSC_A4:2575494-2577007 | WT_5hasex | WT_veg | OK | 136,556 | 334,736 | 1,29353  | -2,65992 | 0,00781581  | 0,0427833   | yes |
| AN2877 | ChrVI_A_nidulans_FGSC_A4:2520822-2522243 | WT_5hasex | WT_veg | OK | 98,2683 | 373,719 | 1,92716  | -3,90484 | 9,42889E-05 | 0,00104173  | yes |
| AN2879 | ChrVI_A_nidulans_FGSC_A4:2516241-2518129 | WT_5hasex | WT_veg | OK | 16,4593 | 60,3363 | 1,87412  | -3,52423 | 0,000424716 | 0,0037831   | yes |
| AN2880 | ChrVI_A_nidulans_FGSC_A4:2511942-2514883 | WT_5hasex | WT_veg | OK | 42,6974 | 177,871 | 2,05861  | -4,24564 | 2,17969E-05 | 0,000287491 | yes |
| AN2888 | ChrVI_A_nidulans_FGSC_A4:2491831-2493193 | WT_5hasex | WT_veg | OK | 301,514 | 84,7505 | -1,83093 | 3,29497  | 0,000984337 | 0,00774725  | yes |
| AN2891 | ChrVI_A_nidulans_FGSC_A4:2484744-2485810 | WT_5hasex | WT_veg | OK | 10,682  | 58,7943 | 2,4605   | -3,46545 | 0,000529347 | 0,00456456  | yes |
| AN2894 | ChrVI_A_nidulans_FGSC_A4:2478645-2479271 | WT_5hasex | WT_veg | OK | 196,376 | 2017,86 | 3,36114  | -6,90212 | 5,12324E-12 | 2,58142E-10 | yes |
| AN2897 | ChrVI_A_nidulans_FGSC_A4:2465356-2468575 | WT_5hasex | WT_veg | OK | 9,68678 | 52,6254 | 2,44167  | -4,68407 | 2,81234E-06 | 4,63759E-05 | yes |
| AN2898 | ChrVI_A_nidulans_FGSC_A4:2462037-2464759 | WT_5hasex | WT_veg | OK | 5,74995 | 18,4774 | 1,68414  | -2,83421 | 0,00459386  | 0,0277848   | yes |
| AN2907 | ChrVI_A_nidulans_FGSC_A4:2435135-2436554 | WT_5hasex | WT_veg | OK | 91,6431 | 245,735 | 1,423    | -2,96805 | 0,00299696  | 0,0195283   | yes |
| AN2909 | ChrVI_A_nidulans_FGSC_A4:2429606-2431104 | WT_5hasex | WT_veg | OK | 97,9519 | 235,477 | 1,26544  | -2,62583 | 0,00864372  | 0,0464039   | yes |
| AN2916 | ChrVI_A_nidulans_FGSC_A4:2405123-2407480 | WT_5hasex | WT_veg | OK | 104,544 | 254,105 | 1,28131  | -2,60649 | 0,00914757  | 0,0485517   | yes |
| AN2932 | ChrVI_A_nidulans_FGSC_A4:2351597-2354019 | WT_5hasex | WT_veg | OK | 454,596 | 1677,3  | 1,88348  | -3,03988 | 0,0023667   | 0,0160668   | yes |
| AN2951 | ChrVI_A_nidulans_FGSC_A4:2285739-2287339 | WT_5hasex | WT_veg | OK | 30,3925 | 101,336 | 1,73735  | -3,50423 | 0,000457931 | 0,00404049  | yes |
| AN2953 | ChrVI_A_nidulans_FGSC_A4:2278954-2280298 | WT_5hasex | WT_veg | OK | 119,868 | 404,885 | 1,75607  | -3,57497 | 0,000350274 | 0,00321061  | yes |
| AN2954 | ChrVI_A_nidulans_FGSC_A4:2273441-2276283 | WT_5hasex | WT_veg | OK | 18,4228 | 136,309 | 2,88731  | -5,46253 | 4,69402E-08 | 1,17355E-06 | yes |
| AN2955 | ChrVI_A_nidulans_FGSC_A4:2262553-2271400 | WT_5hasex | WT_veg | OK | 7,56841 | 30,215  | 1,9972   | -4,15108 | 3,30912E-05 | 0,000418044 | yes |
| AN2973 | ChrVI_A_nidulans_FGSC_A4:2204988-2208312 | WT_5hasex | WT_veg | OK | 5,49614 | 23,1186 | 2,07257  | -3,64769 | 0,000264608 | 0,00253677  | yes |
| AN2976 | ChrVI_A_nidulans_FGSC_A4:2197822-2198416 | WT_5hasex | WT_veg | OK | 117,188 | 307,231 | 1,3905   | -2,80756 | 0,00499177  | 0,0297012   | yes |
| AN2977 | ChrVI_A_nidulans_FGSC_A4:2195519-2197475 | WT_5hasex | WT_veg | OK | 406,318 | 1821,06 | 2,1641   | -3,87428 | 0,000106942 | 0,00116386  | yes |
| AN2978 | ChrVI_A_nidulans_FGSC_A4:2194354-2195360 | WT_5hasex | WT_veg | OK | 516,502 | 1648,9  | 1,67465  | -2,89878 | 0,00374612  | 0,023526    | yes |
| AN2979 | ChrVI_A_nidulans_FGSC_A4:2192123-2194201 | WT_5hasex | WT_veg | OK | 192,322 | 641,061 | 1,73694  | -3,3754  | 0,000737073 | 0,00605109  | yes |
| AN2985 | ChrVI_A_nidulans_FGSC_A4:2169365-2171604 | WT_5hasex | WT_veg | OK | 15,1739 | 199,882 | 3,71948  | -7,10456 | 1,20703E-12 | 6,72786E-11 | yes |
| AN2993 | ChrVI_A_nidulans_FGSC_A4:2153560-2155272 | WT_5hasex | WT_veg | OK | 88,581  | 407,275 | 2,20093  | -3,72474 | 0,000195513 | 0,00195483  | yes |
| AN3000 | ChrVI_A_nidulans_FGSC_A4:2134122-2134743 | WT_5hasex | WT_veg | OK | 66,1077 | 215,799 | 1,7068   | -3,25022 | 0,00115316  | 0,0088293   | yes |
| AN3005 | ChrVI_A_nidulans_FGSC_A4:2121028-2123852 | WT_5hasex | WT_veg | OK | 46,8401 | 249,707 | 2,41442  | -4,97041 | 6,68117E-07 | 1,28291E-05 | yes |
| AN3021 | ChrVI_A_nidulans_FGSC_A4:2079791-2084256 | WT_5hasex | WT_veg | OK | 20,748  | 66,9803 | 1,69077  | -2,98881 | 0,00280068  | 0,0184512   | yes |
| AN3022 | ChrVI_A_nidulans_FGSC_A4:2077643-2079075 | WT_5hasex | WT_veg | OK | 214,272 | 661,322 | 1,62591  | -3,19688 | 0,00138923  | 0,0103012   | yes |
| AN3024 | ChrVI_A_nidulans_FGSC_A4:2073638-2075279 | WT_5hasex | WT_veg | OK | 24,8687 | 227,059 | 3,19066  | -5,87825 | 4,1462E-09  | 1,29636E-07 | yes |
| AN3025 | ChrVI_A_nidulans_FGSC_A4:2072600-2073427 | WT_5hasex | WT_veg | OK | 23,3743 | 66,5033 | 1,5085   | -2,60069 | 0,00930376  | 0,0491567   | yes |
| AN3027 | ChrVI_A_nidulans_FGSC_A4:2067132-2067909 | WT_5hasex | WT_veg | OK | 71,635  | 258,323 | 1,85044  | -3,43502 | 0,000592517 | 0,00503389  | yes |
| AN3028 | ChrVI_A_nidulans_FGSC_A4:2065474-2066615 | WT_5hasex | WT_veg | OK | 29,5465 | 75,2271 | 1,34826  | -2,65372 | 0,007961    | 0,0434057   | yes |
| AN3038 | ChrVI_A_nidulans_FGSC_A4:2038761-2040819 | WT_5hasex | WT_veg | OK | 33,93   | 126,364 | 1,89695  | -3,90415 | 9,45582E-05 | 0,00104361  | yes |
| AN3040 | ChrVI_A_nidulans_FGSC_A4:2035524-2037411 | WT_5hasex | WT_veg | OK | 7,04922 | 20,7397 | 1,55686  | -2,61065 | 0,00903699  | 0,0480963   | yes |
| AN3056 | ChrVI_A_nidulans_FGSC_A4:1982757-1984228 | WT_5hasex | WT_veg | OK | 9,7413  | 51,2098 | 2,39423  | -3,93787 | 8,22095E-05 | 0,000923262 | yes |
| AN3063 | ChrVI_A_nidulans_FGSC_A4:1965059-1967166 | WT_5hasex | WT_veg | OK | 15,5377 | 82,071  | 2,4011   | -4,6535  | 3,26353E-06 | 5,30609E-05 | yes |
| AN3076 | ChrVI_A_nidulans_FGSC_A4:1922142-1923112 | WT_5hasex | WT_veg | OK | 1,77611 | 12,1534 | 2,77457  | -2,60972 | 0,00906176  | 0,0482037   | yes |
| AN3085 | ChrVI_A_nidulans_FGSC_A4:1890896-1892758 | WT_5hasex | WT_veg | OK | 127,582 | 1150,92 | 3,17329  | -5,46756 | 4,56275E-08 | 1,14528E-06 | yes |
| AN3089 | ChrVI_A_nidulans_FGSC_A4:1878110-1879329 | WT_5hasex | WT_veg | OK | 180,391 | 449,813 | 1,3182   | -2,64503 | 0,00816843  | 0,0443245   | yes |
| AN3114 | ChrVI_A_nidulans_FGSC_A4:1781628-1783483 | WT_5hasex | WT_veg | OK | 37,0994 | 164,09  | 2,14502  | -4,3691  | 1,24759E-05 | 0,000174756 | yes |

## Supplementary table 2

|        |                                          |           |        |    |         |          |          |          |             |             |     |
|--------|------------------------------------------|-----------|--------|----|---------|----------|----------|----------|-------------|-------------|-----|
| AN3121 | ChrVI_A_nidulans_FGSC_A4:1761578-1762445 | WT_5hasex | WT_veg | OK | 107,259 | 678,111  | 2,66042  | -5,02853 | 4,94243E-07 | 9,75859E-06 | yes |
| AN3125 | ChrVI_A_nidulans_FGSC_A4:1746178-1747604 | WT_5hasex | WT_veg | OK | 5,96792 | 28,8553  | 2,27353  | -3,47511 | 0,000510652 | 0,00443253  | yes |
| AN3135 | ChrVI_A_nidulans_FGSC_A4:1720196-1720823 | WT_5hasex | WT_veg | OK | 23,3364 | 96,9126  | 2,0541   | -3,53042 | 0,000414907 | 0,0037096   | yes |
| AN3137 | ChrVI_A_nidulans_FGSC_A4:1713779-1715105 | WT_5hasex | WT_veg | OK | 84,7854 | 223,676  | 1,39952  | -2,89338 | 0,00381125  | 0,0238582   | yes |
| AN3139 | ChrVI_A_nidulans_FGSC_A4:1708304-1709832 | WT_5hasex | WT_veg | OK | 11,7217 | 2,67021  | -2,13415 | 2,63841  | 0,00832958  | 0,0450033   | yes |
| AN3140 | ChrVI_A_nidulans_FGSC_A4:1706019-1707922 | WT_5hasex | WT_veg | OK | 71,7192 | 184,884  | 1,36619  | -2,75595 | 0,00585223  | 0,0338039   | yes |
| AN3141 | ChrVI_A_nidulans_FGSC_A4:1701745-1704936 | WT_5hasex | WT_veg | OK | 99,5699 | 310,753  | 1,64198  | -2,65609 | 0,00790517  | 0,0431552   | yes |
| AN3148 | ChrVI_A_nidulans_FGSC_A4:1665307-1668740 | WT_5hasex | WT_veg | OK | 44,5695 | 158,891  | 1,83391  | -3,47879 | 0,000503691 | 0,00437936  | yes |
| AN3150 | ChrVI_A_nidulans_FGSC_A4:1660969-1663388 | WT_5hasex | WT_veg | OK | 74,7072 | 246,61   | 1,72291  | -3,56791 | 0,000359843 | 0,00328253  | yes |
| AN3155 | ChrVI_A_nidulans_FGSC_A4:1632340-1634493 | WT_5hasex | WT_veg | OK | 23,773  | 80,4776  | 1,75926  | -3,25974 | 0,00111515  | 0,00859609  | yes |
| AN3161 | ChrVI_A_nidulans_FGSC_A4:1617420-1618559 | WT_5hasex | WT_veg | OK | 161,183 | 435,553  | 1,43415  | -2,88348 | 0,00393309  | 0,0244573   | yes |
| AN3165 | ChrVI_A_nidulans_FGSC_A4:1608561-1610436 | WT_5hasex | WT_veg | OK | 35,1246 | 118,127  | 1,74978  | -3,59814 | 0,000320497 | 0,00298042  | yes |
| AN3166 | ChrVI_A_nidulans_FGSC_A4:1607439-1608212 | WT_5hasex | WT_veg | OK | 13,0631 | 40,9401  | 1,64801  | -2,60439 | 0,00920374  | 0,0487708   | yes |
| AN3169 | ChrVI_A_nidulans_FGSC_A4:1600286-1602206 | WT_5hasex | WT_veg | OK | 67,4638 | 211,84   | 1,65079  | -3,43729 | 0,000587565 | 0,00500156  | yes |
| AN3170 | ChrVI_A_nidulans_FGSC_A4:1595670-1598568 | WT_5hasex | WT_veg | OK | 14,6409 | 47,3954  | 1,69474  | -3,22576 | 0,00125637  | 0,00947418  | yes |
| AN3171 | ChrVI_A_nidulans_FGSC_A4:1594015-1594873 | WT_5hasex | WT_veg | OK | 16,7134 | 55,7384  | 1,73767  | -2,61482 | 0,00892757  | 0,0476592   | yes |
| AN3173 | ChrVI_A_nidulans_FGSC_A4:1591211-1592199 | WT_5hasex | WT_veg | OK | 70,1154 | 211,639  | 1,5938   | -3,25892 | 0,00111837  | 0,00861959  | yes |
| AN3174 | ChrVI_A_nidulans_FGSC_A4:1589088-1589895 | WT_5hasex | WT_veg | OK | 7,79945 | 28,2959  | 1,85915  | -2,69639 | 0,00700946  | 0,0391797   | yes |
| AN3175 | ChrVI_A_nidulans_FGSC_A4:1581973-1583611 | WT_5hasex | WT_veg | OK | 1,5925  | 35,8123  | 4,49109  | -6,06452 | 1,3235E-09  | 4,5478E-08  | yes |
| AN3179 | ChrVI_A_nidulans_FGSC_A4:1572738-1574866 | WT_5hasex | WT_veg | OK | 87,9496 | 232,608  | 1,40315  | -2,88961 | 0,00385717  | 0,0240766   | yes |
| AN3188 | ChrVI_A_nidulans_FGSC_A4:1539289-1543022 | WT_5hasex | WT_veg | OK | 34,9585 | 104,587  | 1,58099  | -3,30207 | 0,000959752 | 0,00759139  | yes |
| AN3194 | ChrVI_A_nidulans_FGSC_A4:1519689-1521804 | WT_5hasex | WT_veg | OK | 24,594  | 83,3356  | 1,76062  | -3,30088 | 0,000963833 | 0,00761332  | yes |
| AN3198 | ChrVI_A_nidulans_FGSC_A4:1511882-1512867 | WT_5hasex | WT_veg | OK | 59,1576 | 20,6003  | -1,5219  | 2,72359  | 0,00645758  | 0,0367023   | yes |
| AN3206 | ChrVI_A_nidulans_FGSC_A4:1480835-1482864 | WT_5hasex | WT_veg | OK | 99,3959 | 15,796   | -2,65362 | 4,56889  | 4,90304E-06 | 7,60709E-05 | yes |
| AN3222 | ChrVI_A_nidulans_FGSC_A4:1418640-1420425 | WT_5hasex | WT_veg | OK | 91,8931 | 265,694  | 1,53174  | -3,12174 | 0,00179788  | 0,0127676   | yes |
| AN3227 | ChrVI_A_nidulans_FGSC_A4:1404836-1406437 | WT_5hasex | WT_veg | OK | 24,1786 | 0,113703 | -7,73232 | 2,6118   | 0,00900678  | 0,047994    | yes |
| AN3228 | ChrVI_A_nidulans_FGSC_A4:1402956-1403965 | WT_5hasex | WT_veg | OK | 56,9336 | 6,92673  | -3,03903 | 4,52652  | 5,99623E-06 | 9,11031E-05 | yes |
| AN3229 | ChrVI_A_nidulans_FGSC_A4:1400277-1402216 | WT_5hasex | WT_veg | OK | 52,0161 | 4,8026   | -3,43707 | 5,4271   | 5,72778E-08 | 1,41179E-06 | yes |
| AN3231 | ChrVI_A_nidulans_FGSC_A4:1390865-1392196 | WT_5hasex | WT_veg | OK | 38,5036 | 130,206  | 1,75773  | -3,56093 | 0,000369548 | 0,00335732  | yes |
| AN3232 | ChrVI_A_nidulans_FGSC_A4:1388855-1390532 | WT_5hasex | WT_veg | OK | 6,2897  | 70,1442  | 3,47926  | -5,55184 | 2,82683E-08 | 7,43259E-07 | yes |
| AN3239 | ChrVI_A_nidulans_FGSC_A4:1370151-1371627 | WT_5hasex | WT_veg | OK | 103,146 | 16,8961  | -2,60992 | 4,39254  | 1,12036E-05 | 0,000158888 | yes |
| AN3246 | ChrVI_A_nidulans_FGSC_A4:1354082-1354760 | WT_5hasex | WT_veg | OK | 1,33982 | 26,4803  | 4,30481  | -4,61222 | 0,000003984 | 6,30343E-05 | yes |
| AN3247 | ChrVI_A_nidulans_FGSC_A4:1346222-1350716 | WT_5hasex | WT_veg | OK | 20,8309 | 0,199484 | -6,70631 | 4,73948  | 2,14268E-06 | 3,65736E-05 | yes |
| AN3251 | ChrVI_A_nidulans_FGSC_A4:1337289-1338294 | WT_5hasex | WT_veg | OK | 4,55189 | 31,5107  | 2,7913   | -3,88746 | 0,000101301 | 0,00110822  | yes |
| AN3255 | ChrVI_A_nidulans_FGSC_A4:1324990-1326065 | WT_5hasex | WT_veg | OK | 32,1398 | 489,955  | 3,93022  | -7,05567 | 1,71774E-12 | 9,26058E-11 | yes |
| AN3258 | ChrVI_A_nidulans_FGSC_A4:1315104-1315869 | WT_5hasex | WT_veg | OK | 93,0877 | 406,331  | 2,12599  | -4,07792 | 4,54403E-05 | 0,000550735 | yes |
| AN3264 | ChrVI_A_nidulans_FGSC_A4:1296287-1298112 | WT_5hasex | WT_veg | OK | 29,4019 | 99,5289  | 1,75921  | -3,19914 | 0,0013784   | 0,0102339   | yes |
| AN3301 | ChrVI_A_nidulans_FGSC_A4:1193758-1195433 | WT_5hasex | WT_veg | OK | 10,3558 | 29,9329  | 1,53129  | -2,62147 | 0,00875522  | 0,0469016   | yes |
| AN3310 | ChrVI_A_nidulans_FGSC_A4:1160819-1161982 | WT_5hasex | WT_veg | OK | 729,738 | 5336,73  | 2,8705   | -4,66227 | 3,12744E-06 | 0,000051102 | yes |
| AN3312 | ChrVI_A_nidulans_FGSC_A4:1155220-1156304 | WT_5hasex | WT_veg | OK | 38,8882 | 149,48   | 1,94254  | -3,17408 | 0,00150315  | 0,0110119   | yes |
| AN3313 | ChrVI_A_nidulans_FGSC_A4:1152134-1153435 | WT_5hasex | WT_veg | OK | 16,2099 | 72,955   | 2,17013  | -3,81463 | 0,000136387 | 0,00143808  | yes |
| AN3314 | ChrVI_A_nidulans_FGSC_A4:1149169-1149970 | WT_5hasex | WT_veg | OK | 9,15062 | 57,4297  | 2,64986  | -2,98424 | 0,00284281  | 0,0186842   | yes |
| AN3315 | ChrVI_A_nidulans_FGSC_A4:1145054-1147689 | WT_5hasex | WT_veg | OK | 6,78589 | 1,04725  | -2,69593 | 2,80867  | 0,00497465  | 0,0296162   | yes |
| AN3321 | ChrVI_A_nidulans_FGSC_A4:1117905-1119454 | WT_5hasex | WT_veg | OK | 4,91193 | 17,0689  | 1,79701  | -2,6916  | 0,00711099  | 0,0396162   | yes |
| AN3322 | ChrVI_A_nidulans_FGSC_A4:1115171-1116644 | WT_5hasex | WT_veg | OK | 2,38817 | 11,2748  | 2,23913  | -2,73323 | 0,00627156  | 0,0358349   | yes |
| AN3334 | ChrVI_A_nidulans_FGSC_A4:1064589-1065717 | WT_5hasex | WT_veg | OK | 20,6822 | 78,7164  | 1,92828  | -3,37007 | 0,000751483 | 0,00615108  | yes |

## Supplementary table 2

|        |                                          |           |        |    |          |          |              |              |             |             |     |
|--------|------------------------------------------|-----------|--------|----|----------|----------|--------------|--------------|-------------|-------------|-----|
| AN3336 | ChrVI_A_nidulans_FGSC_A4:1058426-1059431 | WT_5hasex | WT_veg | OK | 15,8021  | 0,632131 | -4,64375     | 3,30349      | 0,000954905 | 0,00756214  | yes |
| AN3341 | ChrVI_A_nidulans_FGSC_A4:1039266-1041000 | WT_5hasex | WT_veg | OK | 0,351559 | 8,42835  | 4,58341      | -4,45736     | 8,29755E-06 | 0,000121795 | yes |
| AN3342 | ChrVI_A_nidulans_FGSC_A4:1033272-1037426 | WT_5hasex | WT_veg | OK | 3,55358  | 16,1188  | 2,1814       | -3,36832     | 0,000756273 | 0,00618352  | yes |
| AN3345 | ChrVI_A_nidulans_FGSC_A4:1021784-1023826 | WT_5hasex | WT_veg | OK | 13,9013  | 50,0511  | 1,84818      | -3,09996     | 0,00193544  | 0,0135807   | yes |
| AN3346 | ChrVI_A_nidulans_FGSC_A4:1019349-1020678 | WT_5hasex | WT_veg | OK | 10,06    | 37,3919  | 1,8941       | -2,90918     | 0,00362382  | 0,0228873   | yes |
| AN3356 | ChrVI_A_nidulans_FGSC_A4:984249-986704   | WT_5hasex | WT_veg | OK | 58,691   | 164,47   | 1,48661      | -2,72805     | 0,00637101  | 0,0362963   | yes |
| AN3359 | ChrVI_A_nidulans_FGSC_A4:969082-970949   | WT_5hasex | WT_veg | OK | 96,8682  | 398,99   | 2,04226      | -4,23903     | 2,24485E-05 | 0,00029549  | yes |
| AN3373 | ChrVI_A_nidulans_FGSC_A4:926303-928264   | WT_5hasex | WT_veg | OK | 19,7916  | 60,6119  | 1,61471      | -3,19656     | 0,00139077  | 0,0103082   | yes |
| AN3375 | ChrVI_A_nidulans_FGSC_A4:920937-922820   | WT_5hasex | WT_veg | OK | 98,7067  | 463,189  | 2,23038      | -4,50236     | 6,72045E-06 | 0,000100878 | yes |
| AN3379 | ChrVI_A_nidulans_FGSC_A4:908258-909649   | WT_5hasex | WT_veg | OK | 5,83772  | 29,5088  | 2,33767      | -3,04318     | 0,00234089  | 0,0159102   | yes |
| AN3381 | ChrVI_A_nidulans_FGSC_A4:895605-901877   | WT_5hasex | WT_veg | OK | 9,31054  | 1,50148  | -2,63248     | 4,93989      | 7,81672E-07 | 1,47661E-05 | yes |
| AN3411 | ChrVI_A_nidulans_FGSC_A4:801380-802354   | WT_5hasex | WT_veg | OK | 67,3108  | 210,716  | 1,64639      | -3,34398     | 0,000825844 | 0,00667014  | yes |
| AN3425 | ChrVI_A_nidulans_FGSC_A4:761669-763221   | WT_5hasex | WT_veg | OK | 50,8365  | 276,229  | 2,44193      | -5,08503     | 3,6756E-07  | 7,51791E-06 | yes |
| AN3427 | ChrVI_A_nidulans_FGSC_A4:756390-757684   | WT_5hasex | WT_veg | OK | 20,8622  | 82,4688  | 1,98296      | -3,69277     | 0,000221828 | 0,00217846  | yes |
| AN3445 | ChrVI_A_nidulans_FGSC_A4:690061-692561   | WT_5hasex | WT_veg | OK | 40,2228  | 115,387  | 1,5204       | -3,15811     | 0,00158797  | 0,0115237   | yes |
| AN3452 | ChrVI_A_nidulans_FGSC_A4:671179-673039   | WT_5hasex | WT_veg | OK | 45,0405  | 149,912  | 1,73482      | -3,31322     | 0,000922291 | 0,00734162  | yes |
| AN3453 | ChrVI_A_nidulans_FGSC_A4:668636-670503   | WT_5hasex | WT_veg | OK | 29,753   | 105,441  | 1,82533      | -3,65008     | 0,000262156 | 0,00251989  | yes |
| AN3455 | ChrVI_A_nidulans_FGSC_A4:660826-664329   | WT_5hasex | WT_veg | OK | 19,9741  | 59,5567  | 1,57614      | -3,12854     | 0,00175676  | 0,0125454   | yes |
| AN3458 | ChrVI_A_nidulans_FGSC_A4:655061-655844   | WT_5hasex | WT_veg | OK | 64,8772  | 233,566  | 1,84805      | -3,64829     | 0,000263987 | 0,00253273  | yes |
| AN3459 | ChrVI_A_nidulans_FGSC_A4:652904-654893   | WT_5hasex | WT_veg | OK | 153,104  | 389,274  | 1,34627      | -2,63855     | 0,00832613  | 0,0449939   | yes |
| AN3464 | ChrVI_A_nidulans_FGSC_A4:637743-638775   | WT_5hasex | WT_veg | OK | 42,6533  | 151,832  | 1,83174      | -3,57852     | 0,000345551 | 0,00317335  | yes |
| AN3465 | ChrVI_A_nidulans_FGSC_A4:634354-637153   | WT_5hasex | WT_veg | OK | 10,09    | 35,9337  | 1,83241      | -2,65643     | 0,00789734  | 0,0431259   | yes |
| AN3480 | ChrII_A_nidulans_FGSC_A4:4041023-4041785 | WT_5hasex | WT_veg | OK | 20,7134  | 170,404  | 3,04032      | -5,05994     | 4,1938E-07  | 8,4492E-06  | yes |
| AN3481 | ChrII_A_nidulans_FGSC_A4:4038500-4039021 | WT_5hasex | WT_veg | OK | 612,58   | 3139,57  | 2,3576       | -4,18699     | 2,82674E-05 | 0,00036359  | yes |
| AN3482 | ChrII_A_nidulans_FGSC_A4:4036696-4037949 | WT_5hasex | WT_veg | OK | 11,9741  | 60,4396  | 2,33557      | -3,57607     | 0,000348797 | 0,00319987  | yes |
| AN3506 | ChrII_A_nidulans_FGSC_A4:3952383-3953767 | WT_5hasex | WT_veg | OK | 12,1798  | 63,3639  | 2,37918      | -4,04622     | 5,20514E-05 | 0,000619486 | yes |
| AN3526 | ChrII_A_nidulans_FGSC_A4:3886421-3888378 | WT_5hasex | WT_veg | OK | 16,669   | 70,7696  | 2,08596      | -3,24513     | 0,00117399  | 0,00896389  | yes |
| AN3530 | ChrII_A_nidulans_FGSC_A4:3873132-3874642 | WT_5hasex | WT_veg | OK | 14,7575  | 57,7194  | 1,96761      | -3,17706     | 0,00148778  | 0,0109192   | yes |
| AN3538 | ChrII_A_nidulans_FGSC_A4:3846369-3846945 | WT_5hasex | WT_veg | OK | 0        | 6,09661  | 1.79769e+308 | 1.79769e+308 | 0,0037306   | 0,023443    | yes |
| AN3557 | ChrII_A_nidulans_FGSC_A4:3766665-3767897 | WT_5hasex | WT_veg | OK | 11,465   | 62,6982  | 2,45118      | -3,52951     | 0,000416327 | 0,00371912  | yes |
| AN3558 | ChrII_A_nidulans_FGSC_A4:3765474-3766051 | WT_5hasex | WT_veg | OK | 5,48725  | 50,0264  | 3,18854      | -3,89549     | 0,000097999 | 0,00107681  | yes |
| AN3595 | ChrII_A_nidulans_FGSC_A4:3662418-3663027 | WT_5hasex | WT_veg | OK | 95,9971  | 314,098  | 1,71015      | -3,3564      | 0,000789632 | 0,00642022  | yes |
| AN3599 | ChrII_A_nidulans_FGSC_A4:3652208-3653391 | WT_5hasex | WT_veg | OK | 37,0427  | 99,4073  | 1,42416      | -2,68954     | 0,00715512  | 0,039824    | yes |
| AN3603 | ChrII_A_nidulans_FGSC_A4:3640591-3642137 | WT_5hasex | WT_veg | OK | 16,1752  | 47,3224  | 1,54874      | -2,80674     | 0,00500455  | 0,0297705   | yes |
| AN3627 | ChrII_A_nidulans_FGSC_A4:3550894-3556382 | WT_5hasex | WT_veg | OK | 120,488  | 2245,78  | 4,22026      | -6,74898     | 1,48892E-11 | 6,91075E-10 | yes |
| AN3630 | ChrII_A_nidulans_FGSC_A4:3540854-3542135 | WT_5hasex | WT_veg | OK | 37,0325  | 94,716   | 1,35482      | -2,69113     | 0,00712109  | 0,0396556   | yes |
| AN3638 | ChrII_A_nidulans_FGSC_A4:3524272-3525413 | WT_5hasex | WT_veg | OK | 155,205  | 25,0087  | -2,63367     | 5,29036      | 1,22077E-07 | 2,78255E-06 | yes |
| AN3650 | ChrII_A_nidulans_FGSC_A4:3487103-3490492 | WT_5hasex | WT_veg | OK | 23,2406  | 61,9401  | 1,41423      | -2,91048     | 0,0036088   | 0,0228137   | yes |
| AN3651 | ChrII_A_nidulans_FGSC_A4:3485724-3486954 | WT_5hasex | WT_veg | OK | 31,4636  | 96,3108  | 1,61401      | -3,07672     | 0,00209292  | 0,0145109   | yes |
| AN3652 | ChrII_A_nidulans_FGSC_A4:3483746-3485367 | WT_5hasex | WT_veg | OK | 6,03642  | 30,2391  | 2,32465      | -3,60327     | 0,000314237 | 0,00293314  | yes |
| AN3663 | ChrII_A_nidulans_FGSC_A4:3452415-3453451 | WT_5hasex | WT_veg | OK | 28,2629  | 94,3792  | 1,73956      | -3,24855     | 0,00115994  | 0,00887604  | yes |
| AN3666 | ChrII_A_nidulans_FGSC_A4:3443817-3444650 | WT_5hasex | WT_veg | OK | 13,3582  | 46,5305  | 1,80045      | -2,82321     | 0,00475448  | 0,0285814   | yes |
| AN3669 | ChrII_A_nidulans_FGSC_A4:3424128-3425670 | WT_5hasex | WT_veg | OK | 33,6568  | 89,613   | 1,41281      | -2,81152     | 0,00493085  | 0,0294192   | yes |
| AN3677 | ChrII_A_nidulans_FGSC_A4:3401918-3403753 | WT_5hasex | WT_veg | OK | 8,80947  | 25,3753  | 1,5263       | -2,62173     | 0,00874857  | 0,0468711   | yes |
| AN3679 | ChrII_A_nidulans_FGSC_A4:3396757-3397803 | WT_5hasex | WT_veg | OK | 109,386  | 362,083  | 1,72689      | -3,21782     | 0,0012917   | 0,00969878  | yes |
| AN3680 | ChrII_A_nidulans_FGSC_A4:3395887-3396418 | WT_5hasex | WT_veg | OK | 787,048  | 4641,4   | 2,56004      | -4,46876     | 7,86748E-06 | 0,00011633  | yes |

## Supplementary table 2

|        |                                          |           |        |    |          |         |          |          |             |             |     |
|--------|------------------------------------------|-----------|--------|----|----------|---------|----------|----------|-------------|-------------|-----|
| AN3681 | ChrII_A_nidulans_FGSC_A4:3392941-3393899 | WT_5hasex | WT_veg | OK | 77,3294  | 432,941 | 2,48508  | -5,09858 | 3,42219E-07 | 7,05745E-06 | yes |
| AN3687 | ChrII_A_nidulans_FGSC_A4:3373590-3374608 | WT_5hasex | WT_veg | OK | 167,286  | 419,395 | 1,32599  | -2,77475 | 0,00552445  | 0,0322401   | yes |
| AN3689 | ChrII_A_nidulans_FGSC_A4:3363175-3365499 | WT_5hasex | WT_veg | OK | 68,7701  | 176,541 | 1,36015  | -2,83324 | 0,00460782  | 0,0278563   | yes |
| AN3691 | ChrII_A_nidulans_FGSC_A4:3356894-3359429 | WT_5hasex | WT_veg | OK | 23,2064  | 84,6951 | 1,86775  | -3,82325 | 0,000131706 | 0,00139653  | yes |
| AN3695 | ChrII_A_nidulans_FGSC_A4:3347285-3349177 | WT_5hasex | WT_veg | OK | 65,155   | 159,882 | 1,29506  | -2,70702 | 0,00678904  | 0,0382249   | yes |
| AN3703 | ChrII_A_nidulans_FGSC_A4:3327356-3327970 | WT_5hasex | WT_veg | OK | 680,41   | 4779,46 | 2,81237  | -5,25762 | 1,45935E-07 | 3,27787E-06 | yes |
| AN3736 | ChrII_A_nidulans_FGSC_A4:3227197-3228775 | WT_5hasex | WT_veg | OK | 5,33869  | 26,8617 | 2,33099  | -3,6542  | 0,000257989 | 0,00248377  | yes |
| AN3745 | ChrII_A_nidulans_FGSC_A4:3206210-3206927 | WT_5hasex | WT_veg | OK | 47,7083  | 237,929 | 2,31822  | -4,26093 | 2,03575E-05 | 0,000270704 | yes |
| AN3747 | ChrII_A_nidulans_FGSC_A4:3198599-3200194 | WT_5hasex | WT_veg | OK | 132,167  | 360,509 | 1,44767  | -2,94909 | 0,00318711  | 0,0205577   | yes |
| AN3751 | ChrII_A_nidulans_FGSC_A4:3179477-3182344 | WT_5hasex | WT_veg | OK | 13,0757  | 63,238  | 2,2739   | -4,51517 | 6,32673E-06 | 9,55979E-05 | yes |
| AN3761 | ChrII_A_nidulans_FGSC_A4:3141347-3144917 | WT_5hasex | WT_veg | OK | 21,0363  | 78,5795 | 1,90127  | -3,74215 | 0,000182454 | 0,00184274  | yes |
| AN3768 | ChrII_A_nidulans_FGSC_A4:3108684-3110983 | WT_5hasex | WT_veg | OK | 26,6789  | 67,7817 | 1,3452   | -2,69496 | 0,0070398   | 0,0392965   | yes |
| AN3773 | ChrII_A_nidulans_FGSC_A4:3096851-3099236 | WT_5hasex | WT_veg | OK | 30,2138  | 82,6941 | 1,45258  | -2,87937 | 0,00398472  | 0,0247143   | yes |
| AN3794 | ChrII_A_nidulans_FGSC_A4:3037215-3040143 | WT_5hasex | WT_veg | OK | 10,5503  | 56,3491 | 2,41711  | -4,63574 | 3,55661E-06 | 5,71522E-05 | yes |
| AN3796 | ChrII_A_nidulans_FGSC_A4:3023689-3024759 | WT_5hasex | WT_veg | OK | 280,529  | 82,2669 | -1,76977 | 3,57474  | 0,000350583 | 0,00321255  | yes |
| AN3807 | ChrII_A_nidulans_FGSC_A4:2989380-2991397 | WT_5hasex | WT_veg | OK | 72,3118  | 244,042 | 1,75483  | -3,58834 | 0,000332787 | 0,00307398  | yes |
| AN3812 | ChrII_A_nidulans_FGSC_A4:2980523-2981596 | WT_5hasex | WT_veg | OK | 32,3283  | 92,5881 | 1,51803  | -2,91173 | 0,00359437  | 0,0227426   | yes |
| AN3820 | ChrII_A_nidulans_FGSC_A4:2958564-2959753 | WT_5hasex | WT_veg | OK | 11,6685  | 41,4389 | 1,82836  | -2,82109 | 0,00478611  | 0,0287353   | yes |
| AN3827 | ChrII_A_nidulans_FGSC_A4:2932289-2934601 | WT_5hasex | WT_veg | OK | 29,5009  | 181,506 | 2,62118  | -5,0171  | 5,24566E-07 | 1,02952E-05 | yes |
| AN3829 | ChrII_A_nidulans_FGSC_A4:2927061-2929034 | WT_5hasex | WT_veg | OK | 115,243  | 509,436 | 2,14422  | -4,27568 | 1,90557E-05 | 0,000255451 | yes |
| AN3843 | ChrII_A_nidulans_FGSC_A4:2889612-2891790 | WT_5hasex | WT_veg | OK | 151,433  | 458,902 | 1,59951  | -3,1548  | 0,00160609  | 0,0116358   | yes |
| AN3845 | ChrII_A_nidulans_FGSC_A4:2882697-2883301 | WT_5hasex | WT_veg | OK | 21,1036  | 95,4719 | 2,17758  | -3,42484 | 0,000615173 | 0,00519772  | yes |
| AN3846 | ChrII_A_nidulans_FGSC_A4:2881061-2882501 | WT_5hasex | WT_veg | OK | 213,969  | 965,791 | 2,17431  | -4,26901 | 1,96342E-05 | 0,000262066 | yes |
| AN3848 | ChrII_A_nidulans_FGSC_A4:2877598-2878047 | WT_5hasex | WT_veg | OK | 251,932  | 2189,44 | 3,11945  | -6,34498 | 2,22454E-10 | 8,75152E-09 | yes |
| AN3872 | ChrII_A_nidulans_FGSC_A4:2820683-2821543 | WT_5hasex | WT_veg | OK | 203,958  | 1014,7  | 2,31471  | -4,2842  | 1,83399E-05 | 0,000248013 | yes |
| AN3876 | ChrII_A_nidulans_FGSC_A4:2811202-2812914 | WT_5hasex | WT_veg | OK | 11,2021  | 50,1375 | 2,16212  | -3,56336 | 0,000366144 | 0,00333102  | yes |
| AN3895 | ChrII_A_nidulans_FGSC_A4:2747115-2748975 | WT_5hasex | WT_veg | OK | 7,82968  | 26,1356 | 1,73899  | -2,68361 | 0,00728328  | 0,0404257   | yes |
| AN3900 | ChrII_A_nidulans_FGSC_A4:2733967-2736316 | WT_5hasex | WT_veg | OK | 6,43629  | 30,1681 | 2,22872  | -3,64582 | 0,00026654  | 0,00255155  | yes |
| AN3916 | ChrII_A_nidulans_FGSC_A4:2655310-2657364 | WT_5hasex | WT_veg | OK | 3,86693  | 29,417  | 2,92739  | -4,38045 | 1,18432E-05 | 0,000166711 | yes |
| AN3919 | ChrII_A_nidulans_FGSC_A4:2647132-2648883 | WT_5hasex | WT_veg | OK | 57,6963  | 168,433 | 1,54562  | -3,20372 | 0,00135665  | 0,0101055   | yes |
| AN3923 | ChrII_A_nidulans_FGSC_A4:2634860-2641743 | WT_5hasex | WT_veg | OK | 12,6599  | 32,4033 | 1,35587  | -2,78645 | 0,00532892  | 0,0312986   | yes |
| AN3924 | ChrII_A_nidulans_FGSC_A4:2632635-2634483 | WT_5hasex | WT_veg | OK | 16,4582  | 62,3944 | 1,92261  | -3,70443 | 0,000211863 | 0,00209311  | yes |
| AN3933 | ChrII_A_nidulans_FGSC_A4:2607820-2611753 | WT_5hasex | WT_veg | OK | 26,9658  | 68,7528 | 1,35029  | -2,837   | 0,00455391  | 0,0275973   | yes |
| AN3935 | ChrII_A_nidulans_FGSC_A4:2603343-2604379 | WT_5hasex | WT_veg | OK | 116,061  | 482,408 | 2,05536  | -4,27982 | 1,87045E-05 | 0,000251773 | yes |
| AN3938 | ChrII_A_nidulans_FGSC_A4:2590236-2598156 | WT_5hasex | WT_veg | OK | 4,60298  | 19,9339 | 2,11458  | -4,15862 | 3,20172E-05 | 0,000406238 | yes |
| AN3944 | ChrII_A_nidulans_FGSC_A4:2567154-2570379 | WT_5hasex | WT_veg | OK | 12,3747  | 45,6151 | 1,88212  | -3,72274 | 0,000197072 | 0,00196742  | yes |
| AN3953 | ChrII_A_nidulans_FGSC_A4:2525834-2526896 | WT_5hasex | WT_veg | OK | 19,6021  | 60,5655 | 1,62749  | -2,91247 | 0,00358585  | 0,0226967   | yes |
| AN3960 | ChrII_A_nidulans_FGSC_A4:2507574-2509298 | WT_5hasex | WT_veg | OK | 0,667279 | 4,10783 | 2,62201  | -2,86686 | 0,0041457   | 0,025537    | yes |
| AN3973 | ChrII_A_nidulans_FGSC_A4:2462856-2463780 | WT_5hasex | WT_veg | OK | 119,923  | 370,012 | 1,62547  | -3,39348 | 0,000690102 | 0,00572376  | yes |
| AN4002 | ChrII_A_nidulans_FGSC_A4:2372643-2373752 | WT_5hasex | WT_veg | OK | 6,59557  | 34,7752 | 2,39849  | -3,6324  | 0,000280793 | 0,00266705  | yes |
| AN4003 | ChrII_A_nidulans_FGSC_A4:2369971-2371083 | WT_5hasex | WT_veg | OK | 10,895   | 202,944 | 4,21935  | -6,96783 | 3,21854E-12 | 1,65838E-10 | yes |
| AN4008 | ChrII_A_nidulans_FGSC_A4:2352786-2354155 | WT_5hasex | WT_veg | OK | 218,162  | 1268,25 | 2,53937  | -3,75837 | 0,000171027 | 0,00174191  | yes |
| AN4009 | ChrII_A_nidulans_FGSC_A4:2351265-2352654 | WT_5hasex | WT_veg | OK | 1,33714  | 7,89376 | 2,56157  | -2,96337 | 0,00304291  | 0,0197859   | yes |
| AN4011 | ChrII_A_nidulans_FGSC_A4:2346871-2348350 | WT_5hasex | WT_veg | OK | 1,78456  | 7,50307 | 2,07191  | -2,6571  | 0,00788167  | 0,0430673   | yes |
| AN4019 | ChrII_A_nidulans_FGSC_A4:2323534-2325493 | WT_5hasex | WT_veg | OK | 25,7428  | 71,4597 | 1,47296  | -2,7629  | 0,00572907  | 0,0332574   | yes |
| AN4022 | ChrII_A_nidulans_FGSC_A4:2317509-2319762 | WT_5hasex | WT_veg | OK | 4,99509  | 16,6401 | 1,73608  | -2,8292  | 0,00466642  | 0,0281522   | yes |

## Supplementary table 2

|        |                                          |           |        |    |          |         |          |          |             |             |     |
|--------|------------------------------------------|-----------|--------|----|----------|---------|----------|----------|-------------|-------------|-----|
| AN4025 | ChrII_A_nidulans_FGSC_A4:2311017-2311958 | WT_5hasex | WT_veg | OK | 125,54   | 562,844 | 2,16458  | -4,43226 | 9,32489E-06 | 0,000135246 | yes |
| AN4039 | ChrII_A_nidulans_FGSC_A4:2266587-2271357 | WT_5hasex | WT_veg | OK | 46,014   | 167,573 | 1,86465  | -3,72196 | 0,000197686 | 0,00197279  | yes |
| AN4046 | ChrII_A_nidulans_FGSC_A4:2243653-2245510 | WT_5hasex | WT_veg | OK | 34,9514  | 187,16  | 2,42085  | -5,01692 | 5,25076E-07 | 1,03014E-05 | yes |
| AN4057 | ChrII_A_nidulans_FGSC_A4:2214368-2216408 | WT_5hasex | WT_veg | OK | 58,4312  | 168,921 | 1,53154  | -3,12113 | 0,00180162  | 0,0127907   | yes |
| AN4062 | ChrII_A_nidulans_FGSC_A4:2202356-2203864 | WT_5hasex | WT_veg | OK | 65,2043  | 168,17  | 1,36688  | -2,81736 | 0,00484201  | 0,0289879   | yes |
| AN4063 | ChrII_A_nidulans_FGSC_A4:2200586-2202014 | WT_5hasex | WT_veg | OK | 31,6041  | 93,6267 | 1,56681  | -3,1239  | 0,00178468  | 0,0127031   | yes |
| AN4065 | ChrII_A_nidulans_FGSC_A4:2195769-2197737 | WT_5hasex | WT_veg | OK | 24,4969  | 160,102 | 2,70832  | -5,4676  | 4,56171E-08 | 1,14528E-06 | yes |
| AN4088 | ChrII_A_nidulans_FGSC_A4:2115612-2117361 | WT_5hasex | WT_veg | OK | 92,179   | 286,116 | 1,63409  | -3,14234 | 0,00167605  | 0,0120495   | yes |
| AN4089 | ChrII_A_nidulans_FGSC_A4:2111905-2114372 | WT_5hasex | WT_veg | OK | 104,939  | 275,172 | 1,39078  | -2,69904 | 0,00695401  | 0,0389154   | yes |
| AN4094 | ChrII_A_nidulans_FGSC_A4:2098621-2100188 | WT_5hasex | WT_veg | OK | 97,0284  | 329,535 | 1,76395  | -3,68524 | 0,000228487 | 0,00223547  | yes |
| AN4100 | ChrII_A_nidulans_FGSC_A4:2084470-2085249 | WT_5hasex | WT_veg | OK | 3,37017  | 14,2142 | 2,07644  | -2,63026 | 0,00853187  | 0,0459257   | yes |
| AN4101 | ChrII_A_nidulans_FGSC_A4:2083155-2084445 | WT_5hasex | WT_veg | OK | 3,54095  | 16,381  | 2,20981  | -2,98477 | 0,00283788  | 0,0186611   | yes |
| AN4113 | ChrII_A_nidulans_FGSC_A4:2050750-2054594 | WT_5hasex | WT_veg | OK | 206,68   | 805,023 | 1,96163  | -3,18806 | 0,00143229  | 0,0105607   | yes |
| AN4114 | ChrII_A_nidulans_FGSC_A4:2044365-2046785 | WT_5hasex | WT_veg | OK | 0,831301 | 5,47987 | 2,7207   | -2,87373 | 0,00405655  | 0,0250585   | yes |
| AN4119 | ChrII_A_nidulans_FGSC_A4:2030219-2031888 | WT_5hasex | WT_veg | OK | 404,778  | 8,4472  | -5,58252 | 8,01465  | 1,11022E-15 | 9,07612E-14 | yes |
| AN4120 | ChrII_A_nidulans_FGSC_A4:2026356-2027592 | WT_5hasex | WT_veg | OK | 111,918  | 20,3193 | -2,46152 | 4,17502  | 0,000029796 | 0,00038166  | yes |
| AN4127 | ChrII_A_nidulans_FGSC_A4:2010140-2011047 | WT_5hasex | WT_veg | OK | 3707,78  | 608,613 | -2,60696 | 3,07813  | 0,00208301  | 0,0144517   | yes |
| AN4148 | ChrII_A_nidulans_FGSC_A4:1944776-1946741 | WT_5hasex | WT_veg | OK | 129,553  | 504,066 | 1,96008  | -3,25292 | 0,00114224  | 0,00875977  | yes |
| AN4151 | ChrII_A_nidulans_FGSC_A4:1936664-1938293 | WT_5hasex | WT_veg | OK | 39,3754  | 171,323 | 2,12135  | -4,0912  | 4,29141E-05 | 0,000524926 | yes |
| AN4161 | ChrII_A_nidulans_FGSC_A4:1907504-1908763 | WT_5hasex | WT_veg | OK | 17,7055  | 51,9254 | 1,55224  | -2,79509 | 0,00518845  | 0,030635    | yes |
| AN4162 | ChrII_A_nidulans_FGSC_A4:1905539-1907274 | WT_5hasex | WT_veg | OK | 41,8323  | 156,917 | 1,90731  | -3,97225 | 7,11964E-05 | 0,000815483 | yes |
| AN4164 | ChrII_A_nidulans_FGSC_A4:1902214-1903341 | WT_5hasex | WT_veg | OK | 86,1401  | 374,722 | 2,12106  | -4,42935 | 9,45166E-06 | 0,000136857 | yes |
| AN4168 | ChrII_A_nidulans_FGSC_A4:1892887-1894909 | WT_5hasex | WT_veg | OK | 65,2018  | 191,886 | 1,55727  | -3,15425 | 0,00160913  | 0,0116547   | yes |
| AN4171 | ChrII_A_nidulans_FGSC_A4:1875262-1877268 | WT_5hasex | WT_veg | OK | 139,945  | 435,467 | 1,6377   | -3,23424 | 0,00121968  | 0,00924809  | yes |
| AN4177 | ChrII_A_nidulans_FGSC_A4:1858340-1859659 | WT_5hasex | WT_veg | OK | 2,32897  | 9,77939 | 2,07005  | -2,71799 | 0,0065679   | 0,0372359   | yes |
| AN4187 | ChrII_A_nidulans_FGSC_A4:1823030-1830133 | WT_5hasex | WT_veg | OK | 26,1261  | 68,7875 | 1,39666  | -2,90585 | 0,00366257  | 0,0230986   | yes |
| AN4191 | ChrII_A_nidulans_FGSC_A4:1808443-1809151 | WT_5hasex | WT_veg | OK | 7,1974   | 48,2651 | 2,74543  | -3,98325 | 6,79783E-05 | 0,000783245 | yes |
| AN4192 | ChrII_A_nidulans_FGSC_A4:1805300-1807311 | WT_5hasex | WT_veg | OK | 38,6067  | 152,843 | 1,98513  | -4,14844 | 3,34752E-05 | 0,000421918 | yes |
| AN4196 | ChrII_A_nidulans_FGSC_A4:1790205-1791945 | WT_5hasex | WT_veg | OK | 22,2939  | 63,9525 | 1,52035  | -2,71689 | 0,00658981  | 0,0373278   | yes |
| AN4197 | ChrII_A_nidulans_FGSC_A4:1786822-1789111 | WT_5hasex | WT_veg | OK | 83,7218  | 226,797 | 1,43772  | -2,75369 | 0,00589278  | 0,0339856   | yes |
| AN4198 | ChrII_A_nidulans_FGSC_A4:1784860-1786481 | WT_5hasex | WT_veg | OK | 5,48756  | 33,9568 | 2,62946  | -3,97979 | 6,89773E-05 | 0,000794058 | yes |
| AN4199 | ChrII_A_nidulans_FGSC_A4:1777899-1779000 | WT_5hasex | WT_veg | OK | 6,70276  | 27,7546 | 2,0499   | -3,05613 | 0,00224217  | 0,0153664   | yes |
| AN4208 | ChrII_A_nidulans_FGSC_A4:1741507-1745606 | WT_5hasex | WT_veg | OK | 65,1003  | 271,357 | 2,05946  | -4,09421 | 4,23603E-05 | 0,000518879 | yes |
| AN4224 | ChrII_A_nidulans_FGSC_A4:1689778-1691406 | WT_5hasex | WT_veg | OK | 181,652  | 487,447 | 1,42407  | -2,85314 | 0,00432899  | 0,0264898   | yes |
| AN4226 | ChrII_A_nidulans_FGSC_A4:1684327-1685840 | WT_5hasex | WT_veg | OK | 18,8741  | 87,663  | 2,21556  | -4,10496 | 4,04382E-05 | 0,000497778 | yes |
| AN4229 | ChrII_A_nidulans_FGSC_A4:1678593-1680803 | WT_5hasex | WT_veg | OK | 6,74859  | 25,6466 | 1,92611  | -3,26235 | 0,00110492  | 0,00852979  | yes |
| AN4232 | ChrII_A_nidulans_FGSC_A4:1673498-1675198 | WT_5hasex | WT_veg | OK | 18,2171  | 91,9317 | 2,33526  | -4,2609  | 2,03606E-05 | 0,000270704 | yes |
| AN4233 | ChrII_A_nidulans_FGSC_A4:1671844-1673305 | WT_5hasex | WT_veg | OK | 18,2222  | 92,1568 | 2,33839  | -4,26393 | 2,00866E-05 | 0,000267288 | yes |
| AN4239 | ChrII_A_nidulans_FGSC_A4:1645933-1647881 | WT_5hasex | WT_veg | OK | 73,7169  | 253,039 | 1,77929  | -3,30218 | 0,000959374 | 0,00758954  | yes |
| AN4241 | ChrII_A_nidulans_FGSC_A4:1641526-1643386 | WT_5hasex | WT_veg | OK | 7,608    | 24,3063 | 1,67574  | -2,76465 | 0,00569832  | 0,0331009   | yes |
| AN4247 | ChrII_A_nidulans_FGSC_A4:1626907-1629418 | WT_5hasex | WT_veg | OK | 34,3908  | 83,9675 | 1,28781  | -2,67982 | 0,0073661   | 0,0407828   | yes |
| AN4249 | ChrII_A_nidulans_FGSC_A4:1623126-1625574 | WT_5hasex | WT_veg | OK | 58,3078  | 194,998 | 1,7417   | -3,59738 | 0,000321438 | 0,00298705  | yes |
| AN4252 | ChrII_A_nidulans_FGSC_A4:1612280-1613308 | WT_5hasex | WT_veg | OK | 1833,19  | 8095,18 | 2,14271  | -2,96699 | 0,0030073   | 0,0195835   | yes |
| AN4253 | ChrII_A_nidulans_FGSC_A4:1610062-1611396 | WT_5hasex | WT_veg | OK | 61,4337  | 183,874 | 1,58161  | -3,16601 | 0,00154548  | 0,0112653   | yes |
| AN4256 | ChrII_A_nidulans_FGSC_A4:1604129-1604670 | WT_5hasex | WT_veg | OK | 15,3143  | 69,6354 | 2,18494  | -3,11542 | 0,00183685  | 0,0129986   | yes |
| AN4265 | ChrII_A_nidulans_FGSC_A4:1576693-1579685 | WT_5hasex | WT_veg | OK | 36,1092  | 89,429  | 1,30838  | -2,66211 | 0,00776533  | 0,0425658   | yes |

## Supplementary table 2

|        |                                           |           |        |    |          |         |         |          |             |             |     |
|--------|-------------------------------------------|-----------|--------|----|----------|---------|---------|----------|-------------|-------------|-----|
| AN4266 | ChrII_A_nidulans_FGSC_A4:1572883-1576057  | WT_5hasex | WT_veg | OK | 16,2027  | 41,4983 | 1,35682 | -2,65674 | 0,00789003  | 0,0430995   | yes |
| AN4267 | ChrII_A_nidulans_FGSC_A4:1566187-1570713  | WT_5hasex | WT_veg | OK | 31,2902  | 79,2801 | 1,34125 | -2,71067 | 0,00671472  | 0,0378879   | yes |
| AN4277 | ChrII_A_nidulans_FGSC_A4:1533873-1536067  | WT_5hasex | WT_veg | OK | 4,8081   | 48,3204 | 3,32909 | -4,713   | 2,44096E-06 | 4,08923E-05 | yes |
| AN4290 | ChrIII_A_nidulans_FGSC_A4:2483349-2484927 | WT_5hasex | WT_veg | OK | 61,7606  | 165,755 | 1,4243  | -2,95084 | 0,00316915  | 0,0204574   | yes |
| AN4295 | ChrIII_A_nidulans_FGSC_A4:2468946-2470105 | WT_5hasex | WT_veg | OK | 515,124  | 2114,49 | 2,03732 | -3,19141 | 0,00141581  | 0,0104613   | yes |
| AN4298 | ChrIII_A_nidulans_FGSC_A4:2465054-2467233 | WT_5hasex | WT_veg | OK | 18,366   | 163,311 | 3,15251 | -6,20089 | 5,61451E-10 | 2,0763E-08  | yes |
| AN4299 | ChrIII_A_nidulans_FGSC_A4:2462754-2463509 | WT_5hasex | WT_veg | OK | 2368,66  | 9510,63 | 2,00547 | -3,05967 | 0,00221583  | 0,015218    | yes |
| AN4305 | ChrIII_A_nidulans_FGSC_A4:2451750-2452479 | WT_5hasex | WT_veg | OK | 40,6769  | 107,607 | 1,40349 | -2,63885 | 0,0083187   | 0,0449584   | yes |
| AN4308 | ChrIII_A_nidulans_FGSC_A4:2444412-2445456 | WT_5hasex | WT_veg | OK | 114,271  | 344,019 | 1,59003 | -3,24149 | 0,00118907  | 0,00906056  | yes |
| AN4309 | ChrIII_A_nidulans_FGSC_A4:2443091-2443893 | WT_5hasex | WT_veg | OK | 52,7866  | 153,893 | 1,54368 | -2,8851  | 0,0039129   | 0,0243491   | yes |
| AN4311 | ChrIII_A_nidulans_FGSC_A4:2435787-2437029 | WT_5hasex | WT_veg | OK | 28,9573  | 90,8665 | 1,64982 | -3,23854 | 0,00120143  | 0,00912936  | yes |
| AN4313 | ChrIII_A_nidulans_FGSC_A4:2427350-2429258 | WT_5hasex | WT_veg | OK | 15,0469  | 134,165 | 3,15647 | -5,89529 | 3,74025E-09 | 1,17999E-07 | yes |
| AN4314 | ChrIII_A_nidulans_FGSC_A4:2423232-2426414 | WT_5hasex | WT_veg | OK | 23,6509  | 75,3885 | 1,67245 | -3,36747 | 0,000758622 | 0,00619983  | yes |
| AN4324 | ChrIII_A_nidulans_FGSC_A4:2387354-2388252 | WT_5hasex | WT_veg | OK | 90,94    | 325,837 | 1,84116 | -3,4172  | 0,000632699 | 0,00532093  | yes |
| AN4330 | ChrIII_A_nidulans_FGSC_A4:2368143-2370432 | WT_5hasex | WT_veg | OK | 11,5139  | 80,8642 | 2,81213 | -5,21758 | 1,81275E-07 | 3,97454E-06 | yes |
| AN4338 | ChrIII_A_nidulans_FGSC_A4:2347730-2348632 | WT_5hasex | WT_veg | OK | 11,9713  | 49,7634 | 2,0555  | -2,74738 | 0,00600727  | 0,0345319   | yes |
| AN4339 | ChrIII_A_nidulans_FGSC_A4:2342874-2345262 | WT_5hasex | WT_veg | OK | 8,55913  | 34,4852 | 2,01044 | -3,25861 | 0,0011196   | 0,00862653  | yes |
| AN4340 | ChrIII_A_nidulans_FGSC_A4:2341606-2342476 | WT_5hasex | WT_veg | OK | 187,186  | 785,191 | 2,06857 | -4,30573 | 1,66434E-05 | 0,000227715 | yes |
| AN4345 | ChrIII_A_nidulans_FGSC_A4:2329874-2331916 | WT_5hasex | WT_veg | OK | 2,2532   | 8,69351 | 1,94797 | -2,60515 | 0,00918352  | 0,0486936   | yes |
| AN4346 | ChrIII_A_nidulans_FGSC_A4:2327994-2329454 | WT_5hasex | WT_veg | OK | 22,1597  | 117,709 | 2,40921 | -4,48076 | 7,43775E-06 | 0,000110537 | yes |
| AN4359 | ChrIII_A_nidulans_FGSC_A4:2286047-2287609 | WT_5hasex | WT_veg | OK | 18,9955  | 59,6398 | 1,65062 | -3,03381 | 0,00241487  | 0,0163409   | yes |
| AN4365 | ChrIII_A_nidulans_FGSC_A4:2269133-2272345 | WT_5hasex | WT_veg | OK | 20,3698  | 51,6957 | 1,34361 | -2,71458 | 0,00663597  | 0,0375244   | yes |
| AN4379 | ChrIII_A_nidulans_FGSC_A4:2207554-2208915 | WT_5hasex | WT_veg | OK | 762,273  | 2389,84 | 1,64853 | -2,79324 | 0,00521836  | 0,0307803   | yes |
| AN4386 | ChrIII_A_nidulans_FGSC_A4:2188396-2190664 | WT_5hasex | WT_veg | OK | 21,6712  | 65,2287 | 1,58973 | -3,2041  | 0,00135486  | 0,0100995   | yes |
| AN4392 | ChrIII_A_nidulans_FGSC_A4:2171174-2172513 | WT_5hasex | WT_veg | OK | 0,636518 | 23,7142 | 5,21941 | -3,86233 | 0,000112309 | 0,00121493  | yes |
| AN4396 | ChrIII_A_nidulans_FGSC_A4:2161248-2161990 | WT_5hasex | WT_veg | OK | 65,5967  | 201,498 | 1,61907 | -2,99261 | 0,00276599  | 0,0182641   | yes |
| AN4398 | ChrIII_A_nidulans_FGSC_A4:2156794-2159124 | WT_5hasex | WT_veg | OK | 29,1856  | 85,538  | 1,55131 | -3,18514 | 0,00144683  | 0,0106559   | yes |
| AN4406 | ChrIII_A_nidulans_FGSC_A4:2142026-2143394 | WT_5hasex | WT_veg | OK | 91,6434  | 278,892 | 1,6056  | -3,18737 | 0,00143572  | 0,0105845   | yes |
| AN4411 | ChrIII_A_nidulans_FGSC_A4:2128393-2129641 | WT_5hasex | WT_veg | OK | 57,8436  | 174,67  | 1,59441 | -3,2732  | 0,00106339  | 0,00825902  | yes |
| AN4421 | ChrIII_A_nidulans_FGSC_A4:2094138-2095518 | WT_5hasex | WT_veg | OK | 11,9975  | 49,5125 | 2,04505 | -3,35662 | 0,000789018 | 0,00641715  | yes |
| AN4423 | ChrIII_A_nidulans_FGSC_A4:2089605-2090826 | WT_5hasex | WT_veg | OK | 185,157  | 556,794 | 1,58839 | -2,92719 | 0,00342042  | 0,0218422   | yes |
| AN4426 | ChrIII_A_nidulans_FGSC_A4:2081186-2082055 | WT_5hasex | WT_veg | OK | 3,73452  | 16,1025 | 2,10829 | -2,73568 | 0,00622516  | 0,0355972   | yes |
| AN4431 | ChrIII_A_nidulans_FGSC_A4:2068158-2070366 | WT_5hasex | WT_veg | OK | 18,5167  | 51,5933 | 1,47836 | -2,82497 | 0,00472843  | 0,028451    | yes |
| AN4455 | ChrIII_A_nidulans_FGSC_A4:2000365-2001996 | WT_5hasex | WT_veg | OK | 28,0433  | 90,9143 | 1,69685 | -3,34188 | 0,000832141 | 0,00671479  | yes |
| AN4456 | ChrIII_A_nidulans_FGSC_A4:1997829-1999819 | WT_5hasex | WT_veg | OK | 9,21943  | 65,5419 | 2,82967 | -4,87197 | 1,1049E-06  | 2,00482E-05 | yes |
| AN4460 | ChrIII_A_nidulans_FGSC_A4:1988087-1991130 | WT_5hasex | WT_veg | OK | 12,5744  | 44,5341 | 1,82442 | -3,55017 | 0,000384977 | 0,0034776   | yes |
| AN4461 | ChrIII_A_nidulans_FGSC_A4:1986167-1987836 | WT_5hasex | WT_veg | OK | 28,8428  | 99,9409 | 1,79286 | -3,61922 | 0,000295494 | 0,00278598  | yes |
| AN4468 | ChrIII_A_nidulans_FGSC_A4:1958310-1959063 | WT_5hasex | WT_veg | OK | 173,197  | 531,223 | 1,61691 | -3,36343 | 0,000769811 | 0,00627756  | yes |
| AN4469 | ChrIII_A_nidulans_FGSC_A4:1956657-1958206 | WT_5hasex | WT_veg | OK | 14,5208  | 58,2378 | 2,00383 | -3,4933  | 0,00047709  | 0,00418418  | yes |
| AN4471 | ChrIII_A_nidulans_FGSC_A4:1941383-1942999 | WT_5hasex | WT_veg | OK | 25,9958  | 130,479 | 2,32746 | -4,36694 | 0,0000126   | 0,000176352 | yes |
| AN4472 | ChrIII_A_nidulans_FGSC_A4:1936028-1940754 | WT_5hasex | WT_veg | OK | 13,7178  | 35,5434 | 1,37354 | -2,83886 | 0,00452755  | 0,0274693   | yes |
| AN4478 | ChrIII_A_nidulans_FGSC_A4:1919581-1923647 | WT_5hasex | WT_veg | OK | 24,1902  | 69,6868 | 1,52646 | -3,17432 | 0,00150186  | 0,0110055   | yes |
| AN4483 | ChrIII_A_nidulans_FGSC_A4:1899385-1902182 | WT_5hasex | WT_veg | OK | 401,672  | 1887,16 | 2,23213 | -3,61517 | 0,000300145 | 0,0028207   | yes |
| AN4484 | ChrIII_A_nidulans_FGSC_A4:1894862-1897472 | WT_5hasex | WT_veg | OK | 12,9347  | 36,056  | 1,47899 | -2,78638 | 0,00532999  | 0,0313014   | yes |
| AN4496 | ChrIII_A_nidulans_FGSC_A4:1862765-1865954 | WT_5hasex | WT_veg | OK | 12,528   | 40,7438 | 1,70142 | -3,32371 | 0,000888273 | 0,00711406  | yes |
| AN4538 | ChrIII_A_nidulans_FGSC_A4:1720400-1721926 | WT_5hasex | WT_veg | OK | 37,2743  | 90,8268 | 1,28494 | -2,60021 | 0,00931655  | 0,0492143   | yes |



## Supplementary table 2

|        |                                           |           |        |    |         |         |         |          |             |             |     |
|--------|-------------------------------------------|-----------|--------|----|---------|---------|---------|----------|-------------|-------------|-----|
| AN4540 | ChrIII_A_nidulans_FGSC_A4:1716960-1718389 | WT_5hasex | WT_veg | OK | 10,5143 | 38,879  | 1,88663 | -3,02633 | 0,00247545  | 0,0166671   | yes |
| AN4548 | ChrIII_A_nidulans_FGSC_A4:1689255-1690392 | WT_5hasex | WT_veg | OK | 29,5495 | 104,353 | 1,82027 | -3,44358 | 0,000574056 | 0,0049001   | yes |
| AN4549 | ChrIII_A_nidulans_FGSC_A4:1687706-1688999 | WT_5hasex | WT_veg | OK | 45,4571 | 159,977 | 1,81529 | -3,69532 | 0,000219606 | 0,00215866  | yes |
| AN4559 | ChrIII_A_nidulans_FGSC_A4:1663506-1664288 | WT_5hasex | WT_veg | OK | 161,313 | 843,732 | 2,38692 | -4,88662 | 1,0258E-06  | 1,87557E-05 | yes |
| AN4560 | ChrIII_A_nidulans_FGSC_A4:1662413-1663292 | WT_5hasex | WT_veg | OK | 83,5733 | 478,866 | 2,51851 | -4,87574 | 1,08399E-06 | 1,97097E-05 | yes |
| AN4570 | ChrIII_A_nidulans_FGSC_A4:1633916-1635900 | WT_5hasex | WT_veg | OK | 54,2176 | 191,726 | 1,82221 | -3,78278 | 0,000155085 | 0,00159944  | yes |
| AN4581 | ChrIII_A_nidulans_FGSC_A4:1610967-1613554 | WT_5hasex | WT_veg | OK | 8,49388 | 45,0252 | 2,40624 | -4,32272 | 1,54115E-05 | 0,000212413 | yes |
| AN4586 | ChrIII_A_nidulans_FGSC_A4:1600634-1601769 | WT_5hasex | WT_veg | OK | 35,07   | 951,717 | 4,76222 | -9,08863 | 0           | 0           | yes |
| AN4588 | ChrIII_A_nidulans_FGSC_A4:1596266-1596984 | WT_5hasex | WT_veg | OK | 1,02708 | 8,59726 | 3,06533 | -2,84022 | 0,00450818  | 0,0273868   | yes |
| AN4600 | ChrIII_A_nidulans_FGSC_A4:1558224-1559452 | WT_5hasex | WT_veg | OK | 14,4893 | 50,1306 | 1,7907  | -3,06065 | 0,0022086   | 0,0151804   | yes |
| AN4606 | ChrIII_A_nidulans_FGSC_A4:1540496-1541690 | WT_5hasex | WT_veg | OK | 2,46392 | 18,1143 | 2,8781  | -3,19788 | 0,00138441  | 0,0102698   | yes |
| AN4611 | ChrIII_A_nidulans_FGSC_A4:1527991-1528488 | WT_5hasex | WT_veg | OK | 142,409 | 385,67  | 1,43733 | -2,84385 | 0,00445719  | 0,0271462   | yes |
| AN4613 | ChrIII_A_nidulans_FGSC_A4:1522766-1525497 | WT_5hasex | WT_veg | OK | 20,69   | 95,508  | 2,20669 | -4,41394 | 1,01505E-05 | 0,000145888 | yes |
| AN4614 | ChrIII_A_nidulans_FGSC_A4:1521182-1522585 | WT_5hasex | WT_veg | OK | 90,3319 | 278,257 | 1,62311 | -3,32665 | 0,000878968 | 0,00704492  | yes |
| AN4616 | ChrIII_A_nidulans_FGSC_A4:1517013-1519189 | WT_5hasex | WT_veg | OK | 49,6095 | 187,932 | 1,92152 | -3,82064 | 0,000133104 | 0,00140936  | yes |
| AN4618 | ChrIII_A_nidulans_FGSC_A4:1513355-1515590 | WT_5hasex | WT_veg | OK | 3,77022 | 34,59   | 3,19763 | -5,0455  | 4,5233E-07  | 9,05387E-06 | yes |
| AN4622 | ChrIII_A_nidulans_FGSC_A4:1498736-1500091 | WT_5hasex | WT_veg | OK | 77,9857 | 235,143 | 1,59226 | -3,33622 | 0,000849254 | 0,00683919  | yes |
| AN4636 | ChrIII_A_nidulans_FGSC_A4:1459478-1460473 | WT_5hasex | WT_veg | OK | 96,3152 | 698,011 | 2,85742 | -5,54342 | 2,96615E-08 | 7,75998E-07 | yes |
| AN4648 | ChrIII_A_nidulans_FGSC_A4:1415305-1416931 | WT_5hasex | WT_veg | OK | 23,874  | 135,861 | 2,50862 | -4,6581  | 3,19141E-06 | 5,20175E-05 | yes |
| AN4652 | ChrIII_A_nidulans_FGSC_A4:1396639-1397945 | WT_5hasex | WT_veg | OK | 99,9968 | 328,592 | 1,71634 | -3,53782 | 0,000403447 | 0,00362073  | yes |
| AN4654 | ChrIII_A_nidulans_FGSC_A4:1392923-1394917 | WT_5hasex | WT_veg | OK | 31,6424 | 505,32  | 3,99727 | -8,09202 | 6,66134E-16 | 5,57616E-14 | yes |
| AN4655 | ChrIII_A_nidulans_FGSC_A4:1391290-1392123 | WT_5hasex | WT_veg | OK | 222,193 | 555,998 | 1,32326 | -2,70603 | 0,00680938  | 0,0383147   | yes |
| AN4672 | ChrIII_A_nidulans_FGSC_A4:1353461-1354227 | WT_5hasex | WT_veg | OK | 9,31634 | 52,0946 | 2,4833  | -3,78146 | 0,000155913 | 0,00160605  | yes |
| AN4674 | ChrIII_A_nidulans_FGSC_A4:1348881-1350662 | WT_5hasex | WT_veg | OK | 154,774 | 400,365 | 1,37116 | -2,74931 | 0,005972    | 0,0343631   | yes |
| AN4678 | ChrIII_A_nidulans_FGSC_A4:1336521-1338546 | WT_5hasex | WT_veg | OK | 9,04336 | 25,519  | 1,49664 | -2,6453  | 0,00816189  | 0,0443074   | yes |
| AN4684 | ChrIII_A_nidulans_FGSC_A4:1323173-1324626 | WT_5hasex | WT_veg | OK | 123,472 | 399,095 | 1,69255 | -3,43634 | 0,000589627 | 0,00501503  | yes |
| AN4685 | ChrIII_A_nidulans_FGSC_A4:1320078-1321529 | WT_5hasex | WT_veg | OK | 67,214  | 170,303 | 1,34127 | -2,71577 | 0,00661214  | 0,03743     | yes |
| AN4689 | ChrIII_A_nidulans_FGSC_A4:1311848-1312957 | WT_5hasex | WT_veg | OK | 11,7103 | 113,479 | 3,27657 | -5,45628 | 4,86211E-08 | 1,21326E-06 | yes |
| AN4691 | ChrIII_A_nidulans_FGSC_A4:1305141-1306465 | WT_5hasex | WT_veg | OK | 8,88415 | 66,1021 | 2,89539 | -4,55056 | 5,35033E-06 | 8,22193E-05 | yes |
| AN4696 | ChrIII_A_nidulans_FGSC_A4:1282366-1286373 | WT_5hasex | WT_veg | OK | 25,7466 | 99,8393 | 1,95523 | -3,79305 | 0,000148809 | 0,00154567  | yes |
| AN4699 | ChrIII_A_nidulans_FGSC_A4:1255462-1259167 | WT_5hasex | WT_veg | OK | 61,7822 | 164,504 | 1,41286 | -2,78924 | 0,00528316  | 0,0310868   | yes |
| AN4701 | ChrIII_A_nidulans_FGSC_A4:1249925-1250958 | WT_5hasex | WT_veg | OK | 15,9092 | 49,3074 | 1,63194 | -2,72711 | 0,00638925  | 0,0363884   | yes |
| AN4704 | ChrIII_A_nidulans_FGSC_A4:1241584-1242038 | WT_5hasex | WT_veg | OK | 1,43681 | 16,8129 | 3,54862 | -3,35664 | 0,00078897  | 0,00641715  | yes |
| AN4707 | ChrIII_A_nidulans_FGSC_A4:1221052-1222303 | WT_5hasex | WT_veg | OK | 37,0414 | 98,5812 | 1,41217 | -2,82157 | 0,00477886  | 0,0287025   | yes |
| AN4710 | ChrIII_A_nidulans_FGSC_A4:1214967-1216514 | WT_5hasex | WT_veg | OK | 26,5592 | 77,6681 | 1,54811 | -3,01203 | 0,00259504  | 0,017334    | yes |
| AN4711 | ChrIII_A_nidulans_FGSC_A4:1213520-1214536 | WT_5hasex | WT_veg | OK | 187,445 | 1137,56 | 2,60141 | -5,04746 | 4,47723E-07 | 8,97437E-06 | yes |
| AN4715 | ChrIII_A_nidulans_FGSC_A4:1204790-1205292 | WT_5hasex | WT_veg | OK | 3,29538 | 31,7983 | 3,27043 | -3,79113 | 0,000149961 | 0,00155444  | yes |
| AN4720 | ChrIII_A_nidulans_FGSC_A4:1189852-1190915 | WT_5hasex | WT_veg | OK | 8,50343 | 62,5721 | 2,8794  | -4,05039 | 5,11322E-05 | 0,000610348 | yes |
| AN4729 | ChrIII_A_nidulans_FGSC_A4:1162329-1163806 | WT_5hasex | WT_veg | OK | 13,0938 | 80,4287 | 2,61882 | -4,59204 | 4,38928E-06 | 6,87821E-05 | yes |
| AN4739 | ChrIII_A_nidulans_FGSC_A4:1133563-1135924 | WT_5hasex | WT_veg | OK | 72,4691 | 187,766 | 1,3735  | -2,82885 | 0,00467156  | 0,0281799   | yes |
| AN4740 | ChrIII_A_nidulans_FGSC_A4:1133563-1135924 | WT_5hasex | WT_veg | OK | 55,3891 | 268,611 | 2,27784 | -4,65134 | 3,29785E-06 | 5,35692E-05 | yes |
| AN4745 | ChrIII_A_nidulans_FGSC_A4:1113910-1116579 | WT_5hasex | WT_veg | OK | 74,3745 | 216,097 | 1,5388  | -3,18202 | 0,0014625   | 0,0107562   | yes |
| AN4748 | ChrIII_A_nidulans_FGSC_A4:1109329-1110610 | WT_5hasex | WT_veg | OK | 32,9206 | 142,237 | 2,11123 | -4,17753 | 0,000029469 | 0,000377841 | yes |
| AN4751 | ChrIII_A_nidulans_FGSC_A4:1098756-1099821 | WT_5hasex | WT_veg | OK | 12,1233 | 63,3113 | 2,38468 | -3,7367  | 0,00018645  | 0,00187567  | yes |
| AN4764 | ChrIII_A_nidulans_FGSC_A4:1067509-1070140 | WT_5hasex | WT_veg | OK | 10,2419 | 27,7831 | 1,43973 | -2,69615 | 0,00701459  | 0,039195    | yes |
| AN4771 | ChrIII_A_nidulans_FGSC_A4:1037464-1039236 | WT_5hasex | WT_veg | OK | 11,5678 | 56,369  | 2,28479 | -4,06778 | 0,000047463 | 0,000571629 | yes |

## Supplementary table 2

|        |                                           |           |        |    |         |         |          |          |             |             |     |
|--------|-------------------------------------------|-----------|--------|----|---------|---------|----------|----------|-------------|-------------|-----|
| AN4781 | ChrIII_A_nidulans_FGSC_A4:1013761-1014631 | WT_5hasex | WT_veg | OK | 73,4557 | 196,462 | 1,41931  | -2,90842 | 0,00363257  | 0,0229342   | yes |
| AN4782 | ChrIII_A_nidulans_FGSC_A4:1012091-1013200 | WT_5hasex | WT_veg | OK | 57,9074 | 189,273 | 1,70865  | -3,47327 | 0,00051415  | 0,00445846  | yes |
| AN4792 | ChrIII_A_nidulans_FGSC_A4:975342-977212   | WT_5hasex | WT_veg | OK | 13,1959 | 36,2557 | 1,45812  | -2,61653 | 0,00888274  | 0,0474585   | yes |
| AN4807 | ChrIII_A_nidulans_FGSC_A4:935652-936923   | WT_5hasex | WT_veg | OK | 6,2271  | 26,6704 | 2,09861  | -3,10809 | 0,00188302  | 0,0132662   | yes |
| AN4809 | ChrIII_A_nidulans_FGSC_A4:922910-925502   | WT_5hasex | WT_veg | OK | 17,4542 | 2,12439 | -3,03845 | 4,78288  | 0,000001728 | 3,01133E-05 | yes |
| AN4814 | ChrIII_A_nidulans_FGSC_A4:911040-912707   | WT_5hasex | WT_veg | OK | 47,513  | 125,361 | 1,39969  | -2,89186 | 0,0038297   | 0,0239537   | yes |
| AN4818 | ChrIII_A_nidulans_FGSC_A4:894629-898602   | WT_5hasex | WT_veg | OK | 22,4645 | 53,749  | 1,25859  | -2,59894 | 0,00935112  | 0,049372    | yes |
| AN4821 | ChrIII_A_nidulans_FGSC_A4:886050-888126   | WT_5hasex | WT_veg | OK | 8,39828 | 24,8466 | 1,56488  | -2,64063 | 0,00827513  | 0,0447968   | yes |
| AN4822 | ChrIII_A_nidulans_FGSC_A4:884607-885815   | WT_5hasex | WT_veg | OK | 1025,75 | 4127,75 | 2,00867  | -3,33793 | 0,000844044 | 0,00680141  | yes |
| AN4837 | ChrIII_A_nidulans_FGSC_A4:833914-836302   | WT_5hasex | WT_veg | OK | 21,069  | 100,648 | 2,25612  | -4,177   | 2,95382E-05 | 0,000378635 | yes |
| AN4850 | ChrIII_A_nidulans_FGSC_A4:795216-797746   | WT_5hasex | WT_veg | OK | 21,2261 | 61,3983 | 1,53236  | -3,10494 | 0,00190321  | 0,0133868   | yes |
| AN4861 | ChrIII_A_nidulans_FGSC_A4:740254-741964   | WT_5hasex | WT_veg | OK | 41,6911 | 142,44  | 1,77254  | -3,68027 | 0,000232988 | 0,0022706   | yes |
| AN4865 | ChrIII_A_nidulans_FGSC_A4:732817-735062   | WT_5hasex | WT_veg | OK | 184,154 | 763,047 | 2,05086  | -3,87271 | 0,00010763  | 0,00117037  | yes |
| AN4868 | ChrIII_A_nidulans_FGSC_A4:725080-726337   | WT_5hasex | WT_veg | OK | 12,5515 | 57,5106 | 2,19597  | -3,76002 | 0,000169901 | 0,00173281  | yes |
| AN4878 | ChrIII_A_nidulans_FGSC_A4:694356-697751   | WT_5hasex | WT_veg | OK | 149,435 | 827,035 | 2,46843  | -4,34496 | 1,39301E-05 | 0,00019347  | yes |
| AN4889 | ChrIII_A_nidulans_FGSC_A4:656520-657614   | WT_5hasex | WT_veg | OK | 44,935  | 203,595 | 2,1798   | -4,28622 | 1,81736E-05 | 0,000246017 | yes |
| AN4890 | ChrIII_A_nidulans_FGSC_A4:650648-654106   | WT_5hasex | WT_veg | OK | 26,8235 | 121,055 | 2,17409  | -4,51279 | 6,39817E-06 | 9,64825E-05 | yes |
| AN4899 | ChrIII_A_nidulans_FGSC_A4:621986-623601   | WT_5hasex | WT_veg | OK | 34,163  | 226,845 | 2,7312   | -5,58373 | 2,35415E-08 | 6,2972E-07  | yes |
| AN4901 | ChrIII_A_nidulans_FGSC_A4:612548-615203   | WT_5hasex | WT_veg | OK | 26,9426 | 69,0724 | 1,35822  | -2,73156 | 0,00630362  | 0,0359789   | yes |
| AN4903 | ChrIII_A_nidulans_FGSC_A4:608441-610067   | WT_5hasex | WT_veg | OK | 8,44473 | 44,4422 | 2,39581  | -3,99036 | 6,59732E-05 | 0,000762994 | yes |
| AN4904 | ChrIII_A_nidulans_FGSC_A4:605749-608211   | WT_5hasex | WT_veg | OK | 12,0315 | 36,0487 | 1,58313  | -2,91825 | 0,00352007  | 0,0223641   | yes |
| AN4908 | ChrIII_A_nidulans_FGSC_A4:589753-593698   | WT_5hasex | WT_veg | OK | 32,9716 | 113,327 | 1,7812   | -3,53178 | 0,00041278  | 0,00369436  | yes |
| AN4910 | ChrIII_A_nidulans_FGSC_A4:585367-587753   | WT_5hasex | WT_veg | OK | 32,9474 | 84,7512 | 1,36307  | -2,78185 | 0,00540492  | 0,0316563   | yes |
| AN4911 | ChrIII_A_nidulans_FGSC_A4:583797-584952   | WT_5hasex | WT_veg | OK | 277,792 | 988,117 | 1,83068  | -3,50088 | 0,000463718 | 0,00408422  | yes |
| AN4914 | ChrIII_A_nidulans_FGSC_A4:576037-577803   | WT_5hasex | WT_veg | OK | 20,1711 | 91,7608 | 2,18559  | -4,12726 | 3,67107E-05 | 0,000457918 | yes |
| AN4918 | ChrIII_A_nidulans_FGSC_A4:558281-560434   | WT_5hasex | WT_veg | OK | 24,7643 | 110,871 | 2,16254  | -4,10776 | 3,99515E-05 | 0,000492829 | yes |
| AN4928 | ChrIII_A_nidulans_FGSC_A4:526744-527939   | WT_5hasex | WT_veg | OK | 55,7445 | 155,419 | 1,47926  | -3,02473 | 0,00248852  | 0,0167463   | yes |
| AN4929 | ChrIII_A_nidulans_FGSC_A4:523243-526332   | WT_5hasex | WT_veg | OK | 86,1569 | 273,344 | 1,66568  | -3,07015 | 0,00213949  | 0,0147737   | yes |
| AN4937 | ChrIII_A_nidulans_FGSC_A4:498330-501311   | WT_5hasex | WT_veg | OK | 248,078 | 641,978 | 1,37173  | -2,6091  | 0,00907811  | 0,0482662   | yes |
| AN4940 | ChrIII_A_nidulans_FGSC_A4:492910-494973   | WT_5hasex | WT_veg | OK | 403,066 | 2325,18 | 2,52826  | -4,38237 | 1,17395E-05 | 0,000165414 | yes |
| AN4945 | ChrIII_A_nidulans_FGSC_A4:481731-484023   | WT_5hasex | WT_veg | OK | 38,6441 | 97,5589 | 1,33602  | -2,78611 | 0,00533441  | 0,0313238   | yes |
| AN4946 | ChrIII_A_nidulans_FGSC_A4:480447-480983   | WT_5hasex | WT_veg | OK | 57,7716 | 398,435 | 2,78591  | -5,29819 | 1,16953E-07 | 2,67975E-06 | yes |
| AN4950 | ChrIII_A_nidulans_FGSC_A4:473336-474343   | WT_5hasex | WT_veg | OK | 181,337 | 462,949 | 1,35218  | -2,78497 | 0,00535334  | 0,0313963   | yes |
| AN4954 | ChrIII_A_nidulans_FGSC_A4:461301-462011   | WT_5hasex | WT_veg | OK | 79,7486 | 216,773 | 1,44266  | -2,89141 | 0,00383512  | 0,0239676   | yes |
| AN4966 | ChrIII_A_nidulans_FGSC_A4:426673-428017   | WT_5hasex | WT_veg | OK | 88,9919 | 286,896 | 1,68878  | -3,36996 | 0,000751788 | 0,00615262  | yes |
| AN4972 | ChrIII_A_nidulans_FGSC_A4:408475-411719   | WT_5hasex | WT_veg | OK | 15,0312 | 37,8853 | 1,33368  | -2,59693 | 0,0094062   | 0,0496429   | yes |
| AN4977 | ChrIII_A_nidulans_FGSC_A4:393945-396185   | WT_5hasex | WT_veg | OK | 32,7194 | 87,3266 | 1,41628  | -2,90329 | 0,00369261  | 0,0232628   | yes |
| AN4979 | ChrIII_A_nidulans_FGSC_A4:389466-390603   | WT_5hasex | WT_veg | OK | 64,1858 | 167,666 | 1,38526  | -2,8526  | 0,00433626  | 0,0265237   | yes |
| AN4984 | ChrIII_A_nidulans_FGSC_A4:374434-376535   | WT_5hasex | WT_veg | OK | 64,3376 | 322,284 | 2,3246   | -4,88521 | 1,03318E-06 | 1,88643E-05 | yes |
| AN4985 | ChrIII_A_nidulans_FGSC_A4:367936-371221   | WT_5hasex | WT_veg | OK | 4,92967 | 15,2443 | 1,6287   | -2,84256 | 0,00447527  | 0,0272369   | yes |
| AN4988 | ChrIII_A_nidulans_FGSC_A4:360823-362729   | WT_5hasex | WT_veg | OK | 653,84  | 2289,89 | 1,80827  | -3,02407 | 0,00249395  | 0,0167742   | yes |
| AN4989 | ChrIII_A_nidulans_FGSC_A4:358722-359772   | WT_5hasex | WT_veg | OK | 149,049 | 821,446 | 2,46238  | -4,93018 | 8,21535E-07 | 1,54246E-05 | yes |
| AN4994 | ChrIII_A_nidulans_FGSC_A4:342146-344294   | WT_5hasex | WT_veg | OK | 7,94153 | 34,44   | 2,1166   | -3,6288  | 0,000284738 | 0,00269865  | yes |
| AN4995 | ChrIII_A_nidulans_FGSC_A4:339806-341421   | WT_5hasex | WT_veg | OK | 56,4263 | 166,664 | 1,56251  | -3,12268 | 0,00179211  | 0,0127422   | yes |
| AN5004 | ChrIII_A_nidulans_FGSC_A4:312092-312957   | WT_5hasex | WT_veg | OK | 845,313 | 3467,77 | 2,03645  | -3,6947  | 0,000220145 | 0,00216355  | yes |
| AN5007 | ChrIII_A_nidulans_FGSC_A4:301309-302526   | WT_5hasex | WT_veg | OK | 57,5525 | 525,615 | 3,19106  | -5,40977 | 6,31055E-08 | 1,54238E-06 | yes |

## Supplementary table 2

|        |                                         |           |        |    |          |         |          |          |             |             |     |
|--------|-----------------------------------------|-----------|--------|----|----------|---------|----------|----------|-------------|-------------|-----|
| AN5010 | ChrIII_A_nidulans_FGSC_A4:292850-294101 | WT_5hasex | WT_veg | OK | 19,6091  | 90,201  | 2,20162  | -4,00484 | 6,20593E-05 | 0,000723799 | yes |
| AN5017 | ChrIII_A_nidulans_FGSC_A4:271124-272441 | WT_5hasex | WT_veg | OK | 81,7933  | 592,011 | 2,85557  | -5,10256 | 3,35083E-07 | 6,92663E-06 | yes |
| AN5025 | ChrIII_A_nidulans_FGSC_A4:250267-252157 | WT_5hasex | WT_veg | OK | 12,605   | 43,3189 | 1,781    | -3,19269 | 0,00140952  | 0,0104221   | yes |
| AN5026 | ChrIII_A_nidulans_FGSC_A4:248210-249197 | WT_5hasex | WT_veg | OK | 7,8914   | 33,0468 | 2,06616  | -3,15959 | 0,0015799   | 0,0114779   | yes |
| AN5030 | ChrIII_A_nidulans_FGSC_A4:233019-234231 | WT_5hasex | WT_veg | OK | 0,776933 | 7,6819  | 3,3056   | -3,46072 | 0,000538728 | 0,00463775  | yes |
| AN5034 | ChrIII_A_nidulans_FGSC_A4:220352-221604 | WT_5hasex | WT_veg | OK | 11,3544  | 2,72263 | -2,06018 | 2,70514  | 0,00682749  | 0,0383754   | yes |
| AN5036 | ChrIII_A_nidulans_FGSC_A4:210863-212006 | WT_5hasex | WT_veg | OK | 7,49045  | 34,899  | 2,22006  | -3,41091 | 0,000647465 | 0,00542248  | yes |
| AN5051 | ChrIII_A_nidulans_FGSC_A4:151998-152619 | WT_5hasex | WT_veg | OK | 145,107  | 36,7848 | -1,97994 | 3,56947  | 0,000357699 | 0,00327009  | yes |
| AN5053 | ChrIII_A_nidulans_FGSC_A4:145503-146544 | WT_5hasex | WT_veg | OK | 5,90212  | 30,3306 | 2,36147  | -3,55062 | 0,000384325 | 0,00347245  | yes |
| AN5055 | ChrIII_A_nidulans_FGSC_A4:139263-140797 | WT_5hasex | WT_veg | OK | 25,4572  | 73,8579 | 1,53668  | -2,83922 | 0,00452246  | 0,0274575   | yes |
| AN5056 | ChrIII_A_nidulans_FGSC_A4:136015-136584 | WT_5hasex | WT_veg | OK | 3739,32  | 33212,2 | 3,15086  | -3,83199 | 0,000127109 | 0,00135327  | yes |
| AN5082 | ChrIII_A_nidulans_FGSC_A4:42803-44554   | WT_5hasex | WT_veg | OK | 4,34691  | 29,5693 | 2,76604  | -3,66883 | 0,000243659 | 0,00236143  | yes |
| AN5083 | ChrIII_A_nidulans_FGSC_A4:39074-42183   | WT_5hasex | WT_veg | OK | 5,78066  | 29,3216 | 2,34266  | -3,89341 | 9,88468E-05 | 0,001085    | yes |
| AN5090 | ChrIII_A_nidulans_FGSC_A4:13083-13908   | WT_5hasex | WT_veg | OK | 205,988  | 743,131 | 1,85106  | -3,67355 | 0,000239207 | 0,00232386  | yes |
| AN5092 | ChrIII_A_nidulans_FGSC_A4:1859-7010     | WT_5hasex | WT_veg | OK | 8,18511  | 1,37223 | -2,57648 | 4,32838  | 1,50212E-05 | 0,000207361 | yes |
| AN5095 | ChrV_A_nidulans_FGSC_A4:1137673-1138444 | WT_5hasex | WT_veg | OK | 0,91382  | 7,77088 | 3,0881   | -2,98231 | 0,0028608   | 0,0187718   | yes |
| AN5103 | ChrV_A_nidulans_FGSC_A4:1166777-1168810 | WT_5hasex | WT_veg | OK | 47,6993  | 145,102 | 1,60503  | -3,32677 | 0,000878587 | 0,00704294  | yes |
| AN5109 | ChrV_A_nidulans_FGSC_A4:1184058-1185054 | WT_5hasex | WT_veg | OK | 6,89382  | 40,3415 | 2,54889  | -3,64665 | 0,000265682 | 0,00254559  | yes |
| AN5110 | ChrV_A_nidulans_FGSC_A4:1185650-1189819 | WT_5hasex | WT_veg | OK | 22,858   | 95,197  | 2,05822  | -4,04091 | 5,32432E-05 | 0,000632378 | yes |
| AN5125 | ChrV_A_nidulans_FGSC_A4:1225447-1226199 | WT_5hasex | WT_veg | OK | 274,284  | 703,945 | 1,35979  | -2,81503 | 0,00487729  | 0,0291643   | yes |
| AN5126 | ChrV_A_nidulans_FGSC_A4:1226426-1229104 | WT_5hasex | WT_veg | OK | 19,0052  | 48,7073 | 1,35774  | -2,72862 | 0,00636005  | 0,0362536   | yes |
| AN5128 | ChrV_A_nidulans_FGSC_A4:1231691-1232502 | WT_5hasex | WT_veg | OK | 251,27   | 654,454 | 1,38106  | -2,82549 | 0,00472077  | 0,0284179   | yes |
| AN5145 | ChrV_A_nidulans_FGSC_A4:1285606-1286537 | WT_5hasex | WT_veg | OK | 376,083  | 136,444 | -1,46275 | 2,72055  | 0,00651726  | 0,0369928   | yes |
| AN5146 | ChrV_A_nidulans_FGSC_A4:1287151-1288863 | WT_5hasex | WT_veg | OK | 67,2144  | 186,821 | 1,47482  | -3,04706 | 0,00231088  | 0,0157409   | yes |
| AN5152 | ChrV_A_nidulans_FGSC_A4:1305119-1306816 | WT_5hasex | WT_veg | OK | 75,0103  | 203,758 | 1,44169  | -2,97458 | 0,00293385  | 0,0191863   | yes |
| AN5153 | ChrV_A_nidulans_FGSC_A4:1307692-1308437 | WT_5hasex | WT_veg | OK | 76,5717  | 187,198 | 1,28968  | -2,60248 | 0,00925525  | 0,0489794   | yes |
| AN5159 | ChrV_A_nidulans_FGSC_A4:1327025-1328914 | WT_5hasex | WT_veg | OK | 49,9616  | 149,58  | 1,58203  | -3,0591  | 0,00222     | 0,0152447   | yes |
| AN5164 | ChrV_A_nidulans_FGSC_A4:1350432-1352077 | WT_5hasex | WT_veg | OK | 71,33    | 232,402 | 1,70404  | -3,52212 | 0,00042811  | 0,00381009  | yes |
| AN5166 | ChrV_A_nidulans_FGSC_A4:1355315-1357457 | WT_5hasex | WT_veg | OK | 98,368   | 303,84  | 1,62705  | -3,3311  | 0,000865031 | 0,00695129  | yes |
| AN5169 | ChrV_A_nidulans_FGSC_A4:1375596-1378128 | WT_5hasex | WT_veg | OK | 30,1783  | 88,0156 | 1,54425  | -2,73736 | 0,00619341  | 0,0354464   | yes |
| AN5186 | ChrV_A_nidulans_FGSC_A4:1429284-1431855 | WT_5hasex | WT_veg | OK | 16,6343  | 48,5311 | 1,54475  | -3,11502 | 0,00183931  | 0,0130143   | yes |
| AN5196 | ChrV_A_nidulans_FGSC_A4:1455353-1457197 | WT_5hasex | WT_veg | OK | 29,8833  | 95,612  | 1,67785  | -3,36871 | 0,000755198 | 0,00617666  | yes |
| AN5199 | ChrV_A_nidulans_FGSC_A4:1463366-1464708 | WT_5hasex | WT_veg | OK | 34,4602  | 95,5055 | 1,47065  | -2,82592 | 0,00471452  | 0,0283835   | yes |
| AN5203 | ChrV_A_nidulans_FGSC_A4:1475186-1475961 | WT_5hasex | WT_veg | OK | 70,2318  | 285,289 | 2,02223  | -4,07351 | 4,63097E-05 | 0,000559668 | yes |
| AN5204 | ChrV_A_nidulans_FGSC_A4:1476343-1478028 | WT_5hasex | WT_veg | OK | 44,8236  | 163,03  | 1,86281  | -3,67908 | 0,000234076 | 0,00227951  | yes |
| AN5207 | ChrV_A_nidulans_FGSC_A4:1485150-1486231 | WT_5hasex | WT_veg | OK | 151,228  | 950,438 | 2,65187  | -4,46736 | 7,91912E-06 | 0,000116829 | yes |
| AN5213 | ChrV_A_nidulans_FGSC_A4:1510113-1511497 | WT_5hasex | WT_veg | OK | 195,442  | 825,767 | 2,07899  | -4,00151 | 6,29385E-05 | 0,000732586 | yes |
| AN5231 | ChrV_A_nidulans_FGSC_A4:1573138-1574251 | WT_5hasex | WT_veg | OK | 44,0173  | 170,809 | 1,95624  | -3,79188 | 0,00014951  | 0,00155172  | yes |
| AN5236 | ChrV_A_nidulans_FGSC_A4:1584032-1585459 | WT_5hasex | WT_veg | OK | 79,11    | 212,157 | 1,4232   | -2,8934  | 0,00381097  | 0,0238582   | yes |
| AN5245 | ChrV_A_nidulans_FGSC_A4:1616225-1616721 | WT_5hasex | WT_veg | OK | 377,065  | 1075,62 | 1,51228  | -2,77912 | 0,00545057  | 0,0318709   | yes |
| AN5252 | ChrV_A_nidulans_FGSC_A4:3376951-3378010 | WT_5hasex | WT_veg | OK | 21,1084  | 4,21853 | -2,323   | 2,67933  | 0,00737692  | 0,040833    | yes |
| AN5262 | ChrV_A_nidulans_FGSC_A4:3342101-3343470 | WT_5hasex | WT_veg | OK | 33,8464  | 130,352 | 1,94534  | -3,87658 | 0,000105933 | 0,00115384  | yes |
| AN5276 | ChrV_A_nidulans_FGSC_A4:3295839-3297416 | WT_5hasex | WT_veg | OK | 25,899   | 7,61716 | -1,76557 | 3,24089  | 0,00119158  | 0,00907578  | yes |
| AN5298 | ChrV_A_nidulans_FGSC_A4:3226347-3227154 | WT_5hasex | WT_veg | OK | 0,656366 | 9,20433 | 3,80974  | -3,0102  | 0,00261072  | 0,0174121   | yes |
| AN5302 | ChrV_A_nidulans_FGSC_A4:3212589-3214758 | WT_5hasex | WT_veg | OK | 17,66    | 149,788 | 3,08437  | -5,91358 | 3,34756E-09 | 1,0625E-07  | yes |
| AN5303 | ChrV_A_nidulans_FGSC_A4:3209239-3211303 | WT_5hasex | WT_veg | OK | 7,2266   | 42,3617 | 2,55137  | -4,2217  | 2,42462E-05 | 0,000316215 | yes |

## Supplementary table 2

|        |                                         |           |        |    |          |         |          |          |             |             |     |
|--------|-----------------------------------------|-----------|--------|----|----------|---------|----------|----------|-------------|-------------|-----|
| AN5312 | ChrV_A_nidulans_FGSC_A4:3182643-3184088 | WT_5hasex | WT_veg | OK | 11,1209  | 47,2265 | 2,08632  | -3,00308 | 0,00267264  | 0,0177483   | yes |
| AN5314 | ChrV_A_nidulans_FGSC_A4:3173198-3175207 | WT_5hasex | WT_veg | OK | 1,24301  | 7,22593 | 2,53935  | -2,91887 | 0,00351308  | 0,0223305   | yes |
| AN5317 | ChrV_A_nidulans_FGSC_A4:3167231-3168155 | WT_5hasex | WT_veg | OK | 10,669   | 80,3387 | 2,91266  | -4,63154 | 3,62949E-06 | 5,80917E-05 | yes |
| AN5318 | ChrV_A_nidulans_FGSC_A4:3160321-3164516 | WT_5hasex | WT_veg | OK | 50,1556  | 224,264 | 2,16072  | -4,03635 | 5,42881E-05 | 0,000643475 | yes |
| AN5323 | ChrV_A_nidulans_FGSC_A4:3147960-3150099 | WT_5hasex | WT_veg | OK | 5,3487   | 30,1604 | 2,4954   | -3,88159 | 0,000103776 | 0,00113293  | yes |
| AN5324 | ChrV_A_nidulans_FGSC_A4:3144332-3146101 | WT_5hasex | WT_veg | OK | 618,604  | 7603,8  | 3,61963  | -4,57623 | 4,73436E-06 | 7,36172E-05 | yes |
| AN5327 | ChrV_A_nidulans_FGSC_A4:3135760-3138056 | WT_5hasex | WT_veg | OK | 7,59661  | 31,6336 | 2,05803  | -3,45936 | 0,000541468 | 0,00465682  | yes |
| AN5330 | ChrV_A_nidulans_FGSC_A4:3129243-3129804 | WT_5hasex | WT_veg | OK | 94,1724  | 347,91  | 1,88534  | -3,61079 | 0,000305265 | 0,00286419  | yes |
| AN5331 | ChrV_A_nidulans_FGSC_A4:3125558-3126908 | WT_5hasex | WT_veg | OK | 12,6508  | 77,408  | 2,61326  | -3,77117 | 0,000162487 | 0,00166763  | yes |
| AN5332 | ChrV_A_nidulans_FGSC_A4:3121590-3122146 | WT_5hasex | WT_veg | OK | 11,8009  | 294,354 | 4,64059  | -6,71396 | 1,89413E-11 | 8,59361E-10 | yes |
| AN5338 | ChrV_A_nidulans_FGSC_A4:3101828-3104555 | WT_5hasex | WT_veg | OK | 135,24   | 743,534 | 2,45888  | -4,68641 | 2,78034E-06 | 4,59182E-05 | yes |
| AN5339 | ChrV_A_nidulans_FGSC_A4:3101828-3104555 | WT_5hasex | WT_veg | OK | 136,997  | 811,252 | 2,566    | -4,97301 | 6,59225E-07 | 1,26723E-05 | yes |
| AN5340 | ChrV_A_nidulans_FGSC_A4:3100299-3101637 | WT_5hasex | WT_veg | OK | 24,3849  | 221,655 | 3,18426  | -5,98375 | 2,18062E-09 | 7,1642E-08  | yes |
| AN5341 | ChrV_A_nidulans_FGSC_A4:3095988-3096511 | WT_5hasex | WT_veg | OK | 76,2344  | 274,585 | 1,84874  | -3,5938  | 0,000325888 | 0,00302144  | yes |
| AN5353 | ChrV_A_nidulans_FGSC_A4:3066496-3067268 | WT_5hasex | WT_veg | OK | 20,2255  | 2,42057 | -3,06275 | 3,05845  | 0,00222489  | 0,0152703   | yes |
| AN5357 | ChrV_A_nidulans_FGSC_A4:3049707-3051297 | WT_5hasex | WT_veg | OK | 763,344  | 3103,45 | 2,02347  | -3,40861 | 0,00065294  | 0,00546222  | yes |
| AN5359 | ChrV_A_nidulans_FGSC_A4:3047370-3048003 | WT_5hasex | WT_veg | OK | 0,947821 | 8,11695 | 3,09825  | -2,96169 | 0,00305955  | 0,0198669   | yes |
| AN5370 | ChrV_A_nidulans_FGSC_A4:3019069-3021351 | WT_5hasex | WT_veg | OK | 21,7855  | 1,27754 | -4,09192 | 4,74003  | 2,13685E-06 | 3,64859E-05 | yes |
| AN5373 | ChrV_A_nidulans_FGSC_A4:3012188-3013203 | WT_5hasex | WT_veg | OK | 31,0376  | 96,9111 | 1,64264  | -2,90122 | 0,00371707  | 0,0233804   | yes |
| AN5378 | ChrV_A_nidulans_FGSC_A4:2998826-3001368 | WT_5hasex | WT_veg | OK | 17,3954  | 4,50724 | -1,94839 | 3,3571   | 0,000787658 | 0,00640814  | yes |
| AN5395 | ChrV_A_nidulans_FGSC_A4:2953076-2955743 | WT_5hasex | WT_veg | OK | 5,8548   | 1,54937 | -1,91794 | 2,66388  | 0,00772456  | 0,04239     | yes |
| AN5399 | ChrV_A_nidulans_FGSC_A4:2938045-2938996 | WT_5hasex | WT_veg | OK | 8,69455  | 31,5905 | 1,86131  | -2,88776 | 0,00388     | 0,0241874   | yes |
| AN5401 | ChrV_A_nidulans_FGSC_A4:2929160-2929721 | WT_5hasex | WT_veg | OK | 3,42762  | 24,2712 | 2,82397  | -3,2795  | 0,00103992  | 0,00811646  | yes |
| AN5402 | ChrV_A_nidulans_FGSC_A4:2925188-2926473 | WT_5hasex | WT_veg | OK | 31,632   | 86,7278 | 1,45511  | -2,73984 | 0,00614699  | 0,0352269   | yes |
| AN5404 | ChrV_A_nidulans_FGSC_A4:2916666-2918400 | WT_5hasex | WT_veg | OK | 207,547  | 618,504 | 1,57535  | -3,16089 | 0,00157286  | 0,0114316   | yes |
| AN5409 | ChrV_A_nidulans_FGSC_A4:2896738-2897776 | WT_5hasex | WT_veg | OK | 3,36771  | 13,8837 | 2,04356  | -2,65948 | 0,00782616  | 0,042831    | yes |
| AN5423 | ChrV_A_nidulans_FGSC_A4:2859850-2861210 | WT_5hasex | WT_veg | OK | 71,5634  | 192,13  | 1,42479  | -2,85785 | 0,0042652   | 0,0261716   | yes |
| AN5428 | ChrV_A_nidulans_FGSC_A4:2845478-2846360 | WT_5hasex | WT_veg | OK | 7,00878  | 27,7709 | 1,98634  | -2,84253 | 0,00447573  | 0,0272369   | yes |
| AN5432 | ChrV_A_nidulans_FGSC_A4:2834112-2835142 | WT_5hasex | WT_veg | OK | 0,414177 | 6,70232 | 4,01634  | -3,10334 | 0,0019135   | 0,0134502   | yes |
| AN5443 | ChrV_A_nidulans_FGSC_A4:2801576-2802608 | WT_5hasex | WT_veg | OK | 22,6795  | 114,665 | 2,33796  | -4,33705 | 1,44411E-05 | 0,000199948 | yes |
| AN5445 | ChrV_A_nidulans_FGSC_A4:2796502-2797192 | WT_5hasex | WT_veg | OK | 47,9069  | 130,37  | 1,44431  | -2,70605 | 0,00680891  | 0,0383147   | yes |
| AN5450 | ChrV_A_nidulans_FGSC_A4:2777517-2780101 | WT_5hasex | WT_veg | OK | 50,8121  | 175,516 | 1,78836  | -3,46609 | 0,000528078 | 0,00455662  | yes |
| AN5452 | ChrV_A_nidulans_FGSC_A4:2770207-2774532 | WT_5hasex | WT_veg | OK | 53,8036  | 143,767 | 1,41796  | -2,85924 | 0,00424659  | 0,0260667   | yes |
| AN5455 | ChrV_A_nidulans_FGSC_A4:2756303-2761897 | WT_5hasex | WT_veg | OK | 8,70767  | 38,2882 | 2,13654  | -4,28075 | 1,86267E-05 | 0,000250984 | yes |
| AN5468 | ChrV_A_nidulans_FGSC_A4:2709749-2710225 | WT_5hasex | WT_veg | OK | 10,6212  | 64,8845 | 2,61093  | -3,68481 | 0,000228871 | 0,00223756  | yes |
| AN5480 | ChrV_A_nidulans_FGSC_A4:2674776-2675589 | WT_5hasex | WT_veg | OK | 2185,49  | 15696,9 | 2,84445  | -3,54852 | 0,000387408 | 0,00349594  | yes |
| AN5481 | ChrV_A_nidulans_FGSC_A4:2671331-2674127 | WT_5hasex | WT_veg | OK | 4,98463  | 17,0175 | 1,77146  | -2,91696 | 0,00353465  | 0,0224363   | yes |
| AN5483 | ChrV_A_nidulans_FGSC_A4:2663262-2666935 | WT_5hasex | WT_veg | OK | 15,4098  | 52,2958 | 1,76285  | -3,59253 | 0,000327477 | 0,00303388  | yes |
| AN5488 | ChrV_A_nidulans_FGSC_A4:2639514-2646010 | WT_5hasex | WT_veg | OK | 16,056   | 46,2629 | 1,52675  | -3,16712 | 0,00153958  | 0,011227    | yes |
| AN5489 | ChrV_A_nidulans_FGSC_A4:2633531-2634870 | WT_5hasex | WT_veg | OK | 85,2489  | 251,257 | 1,55941  | -3,14127 | 0,00168216  | 0,0120851   | yes |
| AN5505 | ChrV_A_nidulans_FGSC_A4:2583160-2585059 | WT_5hasex | WT_veg | OK | 0,32594  | 6,49    | 4,31554  | -3,55565 | 0,00037704  | 0,00341533  | yes |
| AN5509 | ChrV_A_nidulans_FGSC_A4:2568537-2570005 | WT_5hasex | WT_veg | OK | 28,3107  | 125,044 | 2,14301  | -4,08534 | 4,40117E-05 | 0,000536224 | yes |
| AN5510 | ChrV_A_nidulans_FGSC_A4:2565335-2566565 | WT_5hasex | WT_veg | OK | 10,5449  | 34,0798 | 1,69237  | -2,786   | 0,00533625  | 0,0313267   | yes |
| AN5512 | ChrV_A_nidulans_FGSC_A4:2560766-2561470 | WT_5hasex | WT_veg | OK | 42,6319  | 138,16  | 1,69634  | -3,1207  | 0,00180419  | 0,0128069   | yes |
| AN5513 | ChrV_A_nidulans_FGSC_A4:2557274-2560060 | WT_5hasex | WT_veg | OK | 3,70284  | 17,7271 | 2,25925  | -3,39642 | 0,00068273  | 0,00567069  | yes |
| AN5522 | ChrV_A_nidulans_FGSC_A4:2524939-2525578 | WT_5hasex | WT_veg | OK | 68,7997  | 201,744 | 1,55205  | -3,08237 | 0,0020536   | 0,0142857   | yes |

## Supplementary table 2

|        |                                         |           |        |    |         |         |          |          |             |             |     |
|--------|-----------------------------------------|-----------|--------|----|---------|---------|----------|----------|-------------|-------------|-----|
| AN5526 | ChrV_A_nidulans_FGSC_A4:2514463-2515336 | WT_5hasex | WT_veg | OK | 79,6927 | 301,252 | 1,91845  | -3,81863 | 0,000134194 | 0,00141851  | yes |
| AN5533 | ChrV_A_nidulans_FGSC_A4:2488486-2490919 | WT_5hasex | WT_veg | OK | 13,2242 | 40,53   | 1,61581  | -2,98907 | 0,0027983   | 0,0184402   | yes |
| AN5536 | ChrV_A_nidulans_FGSC_A4:2481958-2483291 | WT_5hasex | WT_veg | OK | 54,2503 | 168,799 | 1,6376   | -3,33117 | 0,000864822 | 0,00695067  | yes |
| AN5542 | ChrV_A_nidulans_FGSC_A4:2462746-2464102 | WT_5hasex | WT_veg | OK | 18,3763 | 3,18353 | -2,52915 | 3,48321  | 0,00049544  | 0,00431837  | yes |
| AN5547 | ChrV_A_nidulans_FGSC_A4:2452441-2453638 | WT_5hasex | WT_veg | OK | 34,1847 | 110,245 | 1,68929  | -3,11028 | 0,00186908  | 0,013184    | yes |
| AN5549 | ChrV_A_nidulans_FGSC_A4:2444817-2446788 | WT_5hasex | WT_veg | OK | 40,1529 | 140,698 | 1,80903  | -3,58795 | 0,000333289 | 0,00307753  | yes |
| AN5550 | ChrV_A_nidulans_FGSC_A4:2441648-2443179 | WT_5hasex | WT_veg | OK | 6,24402 | 24,9494 | 1,99846  | -2,69884 | 0,00695821  | 0,0389347   | yes |
| AN5564 | ChrV_A_nidulans_FGSC_A4:2396164-2398077 | WT_5hasex | WT_veg | OK | 692,68  | 3348,53 | 2,27326  | -3,5081  | 0,000451319 | 0,00399022  | yes |
| AN5565 | ChrV_A_nidulans_FGSC_A4:2393894-2394953 | WT_5hasex | WT_veg | OK | 10,2847 | 67,8838 | 2,72257  | -4,07417 | 4,61792E-05 | 0,000558477 | yes |
| AN5566 | ChrV_A_nidulans_FGSC_A4:2389713-2391539 | WT_5hasex | WT_veg | OK | 27,0588 | 73,4541 | 1,44074  | -2,85199 | 0,00434459  | 0,0265684   | yes |
| AN5570 | ChrV_A_nidulans_FGSC_A4:2375527-2377619 | WT_5hasex | WT_veg | OK | 43,4715 | 140,501 | 1,69244  | -3,31708 | 0,000909627 | 0,00725073  | yes |
| AN5576 | ChrV_A_nidulans_FGSC_A4:2353321-2354861 | WT_5hasex | WT_veg | OK | 15,7349 | 56,8454 | 1,85307  | -3,34618 | 0,000819329 | 0,00662773  | yes |
| AN5578 | ChrV_A_nidulans_FGSC_A4:2349375-2351712 | WT_5hasex | WT_veg | OK | 13,0159 | 36,831  | 1,50064  | -2,87749 | 0,00400848  | 0,0248328   | yes |
| AN5579 | ChrV_A_nidulans_FGSC_A4:2338964-2348646 | WT_5hasex | WT_veg | OK | 17,803  | 101,761 | 2,51498  | -5,08953 | 3,58958E-07 | 7,36368E-06 | yes |
| AN5591 | ChrV_A_nidulans_FGSC_A4:2302670-2304373 | WT_5hasex | WT_veg | OK | 118,039 | 667,652 | 2,49983  | -5,03536 | 4,76948E-07 | 9,46705E-06 | yes |
| AN5598 | ChrV_A_nidulans_FGSC_A4:2282780-2284166 | WT_5hasex | WT_veg | OK | 33,7468 | 95,2404 | 1,49682  | -2,90788 | 0,00363892  | 0,022966    | yes |
| AN5599 | ChrV_A_nidulans_FGSC_A4:2279082-2281960 | WT_5hasex | WT_veg | OK | 89,789  | 324,766 | 1,85479  | -3,58446 | 0,000337779 | 0,00311461  | yes |
| AN5602 | ChrV_A_nidulans_FGSC_A4:2272709-2274633 | WT_5hasex | WT_veg | OK | 156,776 | 637,893 | 2,02461  | -3,91008 | 9,22656E-05 | 0,00102326  | yes |
| AN5603 | ChrV_A_nidulans_FGSC_A4:2257108-2260929 | WT_5hasex | WT_veg | OK | 24,35   | 72,083  | 1,56574  | -2,97828 | 0,00289869  | 0,0189871   | yes |
| AN5605 | ChrV_A_nidulans_FGSC_A4:2251416-2252275 | WT_5hasex | WT_veg | OK | 12,2109 | 57,1723 | 2,22714  | -3,57427 | 0,000351208 | 0,00321692  | yes |
| AN5607 | ChrV_A_nidulans_FGSC_A4:2240769-2246790 | WT_5hasex | WT_veg | OK | 24,1443 | 67,3647 | 1,48031  | -3,11071 | 0,0018664   | 0,0131739   | yes |
| AN5619 | ChrV_A_nidulans_FGSC_A4:2194074-2196833 | WT_5hasex | WT_veg | OK | 17,4058 | 50,3209 | 1,53159  | -3,0831  | 0,00204854  | 0,0142673   | yes |
| AN5621 | ChrV_A_nidulans_FGSC_A4:2187435-2189000 | WT_5hasex | WT_veg | OK | 25,8457 | 123,78  | 2,25978  | -4,54502 | 5,49301E-06 | 8,41898E-05 | yes |
| AN5624 | ChrV_A_nidulans_FGSC_A4:2178020-2182109 | WT_5hasex | WT_veg | OK | 30,1927 | 266,684 | 3,14286  | -6,38855 | 1,6747E-10  | 6,69393E-09 | yes |
| AN5639 | ChrV_A_nidulans_FGSC_A4:2128164-2129835 | WT_5hasex | WT_veg | OK | 18,7039 | 53,3029 | 1,51088  | -2,75553 | 0,0058597   | 0,0338321   | yes |
| AN5642 | ChrV_A_nidulans_FGSC_A4:2117844-2119046 | WT_5hasex | WT_veg | OK | 40,5867 | 102,902 | 1,34219  | -2,71622 | 0,00660312  | 0,0373991   | yes |
| AN5655 | ChrV_A_nidulans_FGSC_A4:2075275-2077220 | WT_5hasex | WT_veg | OK | 3,98287 | 15,1086 | 1,92349  | -2,84735 | 0,00440844  | 0,0268993   | yes |
| AN5656 | ChrV_A_nidulans_FGSC_A4:2072456-2074285 | WT_5hasex | WT_veg | OK | 2,69749 | 10,459  | 1,95505  | -2,79702 | 0,00515761  | 0,0304907   | yes |
| AN5664 | ChrV_A_nidulans_FGSC_A4:2042315-2043637 | WT_5hasex | WT_veg | OK | 7,61971 | 35,9262 | 2,23723  | -2,83591 | 0,00456955  | 0,0276701   | yes |
| AN5667 | ChrV_A_nidulans_FGSC_A4:2034811-2037011 | WT_5hasex | WT_veg | OK | 11,3011 | 45,6277 | 2,01345  | -3,67514 | 0,000237716 | 0,00231067  | yes |
| AN5685 | ChrV_A_nidulans_FGSC_A4:1984795-1985522 | WT_5hasex | WT_veg | OK | 9,87515 | 40,939  | 2,0516   | -3,10309 | 0,0019151   | 0,0134578   | yes |
| AN5693 | ChrV_A_nidulans_FGSC_A4:1964703-1965743 | WT_5hasex | WT_veg | OK | 83,867  | 242,38  | 1,53109  | -2,99293 | 0,0027631   | 0,0182496   | yes |
| AN5694 | ChrV_A_nidulans_FGSC_A4:1961833-1964039 | WT_5hasex | WT_veg | OK | 7,31678 | 28,082  | 1,94036  | -3,30473 | 0,00095068  | 0,00753441  | yes |
| AN5699 | ChrV_A_nidulans_FGSC_A4:1949465-1950368 | WT_5hasex | WT_veg | OK | 21,634  | 67,5727 | 1,64314  | -2,86768 | 0,00413495  | 0,0254857   | yes |
| AN5702 | ChrV_A_nidulans_FGSC_A4:1941270-1943070 | WT_5hasex | WT_veg | OK | 28,3693 | 187,617 | 2,72539  | -5,30511 | 1,12603E-07 | 2,59027E-06 | yes |
| AN5711 | ChrV_A_nidulans_FGSC_A4:1917943-1919230 | WT_5hasex | WT_veg | OK | 16,4805 | 53,8688 | 1,70869  | -3,02644 | 0,00247455  | 0,0166666   | yes |
| AN5718 | ChrV_A_nidulans_FGSC_A4:1897748-1899481 | WT_5hasex | WT_veg | OK | 65,6665 | 170,901 | 1,37993  | -2,83899 | 0,0045257   | 0,0274614   | yes |
| AN5721 | ChrV_A_nidulans_FGSC_A4:1892129-1894422 | WT_5hasex | WT_veg | OK | 31,1991 | 96,6511 | 1,63128  | -3,35601 | 0,000790761 | 0,0064264   | yes |
| AN5735 | ChrV_A_nidulans_FGSC_A4:1846210-1848932 | WT_5hasex | WT_veg | OK | 13,9152 | 37,4761 | 1,4293   | -2,78526 | 0,00534851  | 0,031375    | yes |
| AN5737 | ChrV_A_nidulans_FGSC_A4:1841641-1844467 | WT_5hasex | WT_veg | OK | 96,1386 | 243,105 | 1,33839  | -2,69953 | 0,00694383  | 0,0388789   | yes |
| AN5741 | ChrV_A_nidulans_FGSC_A4:1833653-1834821 | WT_5hasex | WT_veg | OK | 64,1745 | 177,933 | 1,47126  | -3,0127  | 0,00258933  | 0,0173047   | yes |
| AN5743 | ChrV_A_nidulans_FGSC_A4:1827232-1830752 | WT_5hasex | WT_veg | OK | 68,5617 | 224,657 | 1,71225  | -3,48907 | 0,000484701 | 0,00423675  | yes |
| AN5745 | ChrV_A_nidulans_FGSC_A4:1822552-1823849 | WT_5hasex | WT_veg | OK | 139,431 | 439,246 | 1,65548  | -3,40369 | 0,000664811 | 0,00554207  | yes |
| AN5750 | ChrV_A_nidulans_FGSC_A4:1809772-1811362 | WT_5hasex | WT_veg | OK | 38,828  | 262,158 | 2,75527  | -5,69713 | 1,21841E-08 | 3,46054E-07 | yes |
| AN5759 | ChrV_A_nidulans_FGSC_A4:1781923-1784803 | WT_5hasex | WT_veg | OK | 12,9413 | 48,2861 | 1,89962  | -3,7385  | 0,000185125 | 0,00186448  | yes |
| AN5764 | ChrV_A_nidulans_FGSC_A4:1769851-1772542 | WT_5hasex | WT_veg | OK | 59,695  | 291,848 | 2,28953  | -4,71859 | 2,37486E-06 | 3,99254E-05 | yes |

## Supplementary table 2

|        |                                         |           |        |    |         |         |          |          |             |             |     |
|--------|-----------------------------------------|-----------|--------|----|---------|---------|----------|----------|-------------|-------------|-----|
| AN5765 | ChrV_A_nidulans_FGSC_A4:1768764-1769358 | WT_5hasex | WT_veg | OK | 2,83074 | 21,6098 | 2,93244  | -3,01675 | 0,00255504  | 0,0171236   | yes |
| AN5768 | ChrV_A_nidulans_FGSC_A4:1761458-1762904 | WT_5hasex | WT_veg | OK | 112,255 | 466,739 | 2,05584  | -4,26968 | 1,95757E-05 | 0,000261552 | yes |
| AN5771 | ChrV_A_nidulans_FGSC_A4:1755337-1756186 | WT_5hasex | WT_veg | OK | 145,475 | 366,782 | 1,33415  | -2,7705  | 0,00559704  | 0,0325776   | yes |
| AN5775 | ChrV_A_nidulans_FGSC_A4:1732249-1734856 | WT_5hasex | WT_veg | OK | 11,5489 | 37,7655 | 1,70931  | -3,12063 | 0,00180463  | 0,0128069   | yes |
| AN5776 | ChrV_A_nidulans_FGSC_A4:1727558-1731516 | WT_5hasex | WT_veg | OK | 24,8698 | 61,4299 | 1,30455  | -2,64659 | 0,00813078  | 0,0441832   | yes |
| AN5782 | ChrV_A_nidulans_FGSC_A4:1714275-1715399 | WT_5hasex | WT_veg | OK | 118,536 | 494,223 | 2,05983  | -4,20364 | 2,62651E-05 | 0,000340174 | yes |
| AN5785 | ChrV_A_nidulans_FGSC_A4:1709606-1710522 | WT_5hasex | WT_veg | OK | 75,5357 | 565,944 | 2,90543  | -5,93289 | 2,97644E-09 | 9,53371E-08 | yes |
| AN5786 | ChrV_A_nidulans_FGSC_A4:1707035-1709299 | WT_5hasex | WT_veg | OK | 44,7489 | 144,479 | 1,69094  | -3,50414 | 0,000458091 | 0,00404123  | yes |
| AN5788 | ChrV_A_nidulans_FGSC_A4:1700525-1701344 | WT_5hasex | WT_veg | OK | 38,6639 | 173,069 | 2,16229  | -3,95592 | 7,62403E-05 | 0,000866062 | yes |
| AN5789 | ChrV_A_nidulans_FGSC_A4:1698844-1700214 | WT_5hasex | WT_veg | OK | 28,6588 | 116,187 | 2,0194   | -3,95162 | 7,76245E-05 | 0,000879498 | yes |
| AN5795 | ChrV_A_nidulans_FGSC_A4:1680998-1684994 | WT_5hasex | WT_veg | OK | 21,8177 | 52,5705 | 1,26875  | -2,63265 | 0,0084722   | 0,0456514   | yes |
| AN5799 | Chrl_A_nidulans_FGSC_A4:2204395-2207013 | WT_5hasex | WT_veg | OK | 82,0008 | 211,924 | 1,36984  | -2,79236 | 0,00523247  | 0,0308553   | yes |
| AN5806 | Chrl_A_nidulans_FGSC_A4:2186266-2187260 | WT_5hasex | WT_veg | OK | 98,1996 | 264,282 | 1,42829  | -2,8503  | 0,00436774  | 0,026682    | yes |
| AN5819 | Chrl_A_nidulans_FGSC_A4:2158285-2159557 | WT_5hasex | WT_veg | OK | 204,694 | 506,151 | 1,3061   | -2,617   | 0,00887055  | 0,0474079   | yes |
| AN5824 | Chrl_A_nidulans_FGSC_A4:2136040-2138535 | WT_5hasex | WT_veg | OK | 36,6836 | 94,1095 | 1,35921  | -2,81818 | 0,00482965  | 0,028937    | yes |
| AN5839 | Chrl_A_nidulans_FGSC_A4:2076680-2081509 | WT_5hasex | WT_veg | OK | 15,4398 | 37,7996 | 1,29172  | -2,67996 | 0,0073631   | 0,0407823   | yes |
| AN5844 | Chrl_A_nidulans_FGSC_A4:2056413-2057055 | WT_5hasex | WT_veg | OK | 68,0506 | 7,42153 | -3,19682 | 4,52572  | 6,01916E-06 | 9,13985E-05 | yes |
| AN5846 | Chrl_A_nidulans_FGSC_A4:2052851-2054467 | WT_5hasex | WT_veg | OK | 90,1125 | 33,0135 | -1,44867 | 2,71099  | 0,00670825  | 0,0378595   | yes |
| AN5855 | Chrl_A_nidulans_FGSC_A4:2006437-2007366 | WT_5hasex | WT_veg | OK | 24,9004 | 180,845 | 2,86051  | -5,19667 | 2,02895E-07 | 4,41533E-06 | yes |
| AN5856 | Chrl_A_nidulans_FGSC_A4:2001382-2004247 | WT_5hasex | WT_veg | OK | 68,5258 | 201,419 | 1,55548  | -3,05118 | 0,00227944  | 0,0155639   | yes |
| AN5865 | Chrl_A_nidulans_FGSC_A4:1972626-1975038 | WT_5hasex | WT_veg | OK | 31,3598 | 286,751 | 3,19281  | -6,30605 | 2,86247E-10 | 1,10293E-08 | yes |
| AN5866 | Chrl_A_nidulans_FGSC_A4:1970860-1972429 | WT_5hasex | WT_veg | OK | 85,2309 | 324,702 | 1,92967  | -4,00593 | 6,17735E-05 | 0,000721108 | yes |
| AN5867 | Chrl_A_nidulans_FGSC_A4:1966476-1968830 | WT_5hasex | WT_veg | OK | 45,3151 | 164,59  | 1,86081  | -3,88056 | 0,000104215 | 0,00113678  | yes |
| AN5871 | Chrl_A_nidulans_FGSC_A4:1953794-1955567 | WT_5hasex | WT_veg | OK | 7,55648 | 45,8735 | 2,60188  | -4,1971  | 2,70358E-05 | 0,000349465 | yes |
| AN5875 | Chrl_A_nidulans_FGSC_A4:1941961-1943210 | WT_5hasex | WT_veg | OK | 37,0395 | 169,385 | 2,19317  | -4,32593 | 1,51886E-05 | 0,000209396 | yes |
| AN5897 | Chrl_A_nidulans_FGSC_A4:1868039-1868914 | WT_5hasex | WT_veg | OK | 88,8486 | 262,328 | 1,56195  | -3,17022 | 0,00152322  | 0,0111326   | yes |
| AN5904 | Chrl_A_nidulans_FGSC_A4:1851762-1852485 | WT_5hasex | WT_veg | OK | 514,024 | 1911,32 | 1,89466  | -3,71794 | 0,000200854 | 0,0020006   | yes |
| AN5906 | Chrl_A_nidulans_FGSC_A4:1845336-1846919 | WT_5hasex | WT_veg | OK | 71,4043 | 203,994 | 1,51444  | -3,11323 | 0,00185049  | 0,0130845   | yes |
| AN5907 | Chrl_A_nidulans_FGSC_A4:1844218-1845169 | WT_5hasex | WT_veg | OK | 653,194 | 3578,38 | 2,45372  | -4,26759 | 1,97593E-05 | 0,000263467 | yes |
| AN5911 | Chrl_A_nidulans_FGSC_A4:1834264-1836609 | WT_5hasex | WT_veg | OK | 18,0119 | 54,1717 | 1,58859  | -3,15088 | 0,00162782  | 0,0117608   | yes |
| AN5913 | Chrl_A_nidulans_FGSC_A4:1830500-1832112 | WT_5hasex | WT_veg | OK | 36,6039 | 120,376 | 1,71748  | -2,86787 | 0,0041325   | 0,0254766   | yes |
| AN5931 | Chrl_A_nidulans_FGSC_A4:1770876-1773930 | WT_5hasex | WT_veg | OK | 99,0772 | 900,034 | 3,18335  | -6,27815 | 3,42625E-10 | 1,31053E-08 | yes |
| AN5933 | Chrl_A_nidulans_FGSC_A4:1760213-1762487 | WT_5hasex | WT_veg | OK | 11,1416 | 35,6982 | 1,6799   | -3,0283  | 0,00245933  | 0,0165818   | yes |
| AN5935 | Chrl_A_nidulans_FGSC_A4:1754268-1756423 | WT_5hasex | WT_veg | OK | 148,124 | 577,22  | 1,96232  | -3,70122 | 0,000214565 | 0,00211585  | yes |
| AN5938 | Chrl_A_nidulans_FGSC_A4:1740509-1741327 | WT_5hasex | WT_veg | OK | 4,34901 | 26,3464 | 2,59885  | -3,4474  | 0,000566016 | 0,00484158  | yes |
| AN5939 | Chrl_A_nidulans_FGSC_A4:1737725-1739572 | WT_5hasex | WT_veg | OK | 55,6758 | 208,446 | 1,90455  | -3,01431 | 0,00257568  | 0,0172355   | yes |
| AN5940 | Chrl_A_nidulans_FGSC_A4:1734382-1734961 | WT_5hasex | WT_veg | OK | 51,596  | 176,884 | 1,77748  | -3,07971 | 0,00207205  | 0,014389    | yes |
| AN5947 | Chrl_A_nidulans_FGSC_A4:1707272-1711587 | WT_5hasex | WT_veg | OK | 8,41519 | 28,2479 | 1,74708  | -3,19309 | 0,00140761  | 0,0104139   | yes |
| AN5953 | Chrl_A_nidulans_FGSC_A4:1694336-1695454 | WT_5hasex | WT_veg | OK | 90,4366 | 246,708 | 1,44782  | -2,77927 | 0,00544815  | 0,0318631   | yes |
| AN5955 | Chrl_A_nidulans_FGSC_A4:1688292-1690460 | WT_5hasex | WT_veg | OK | 18,5477 | 52,1094 | 1,4903   | -2,81501 | 0,0048776   | 0,0291643   | yes |
| AN5959 | Chrl_A_nidulans_FGSC_A4:1671952-1674094 | WT_5hasex | WT_veg | OK | 66,3023 | 245,948 | 1,89122  | -3,94579 | 7,95383E-05 | 0,000897881 | yes |
| AN5966 | Chrl_A_nidulans_FGSC_A4:1651222-1653705 | WT_5hasex | WT_veg | OK | 33,5733 | 239,529 | 2,83481  | -5,92502 | 3,12267E-09 | 9,94737E-08 | yes |
| AN5975 | Chrl_A_nidulans_FGSC_A4:1622081-1623690 | WT_5hasex | WT_veg | OK | 896,889 | 4772,85 | 2,41185  | -3,09075 | 0,00199655  | 0,0139543   | yes |
| AN5980 | Chrl_A_nidulans_FGSC_A4:1606032-1607004 | WT_5hasex | WT_veg | OK | 21,9771 | 65,7409 | 1,58079  | -2,87138 | 0,00408685  | 0,0252249   | yes |
| AN5981 | Chrl_A_nidulans_FGSC_A4:1601436-1605200 | WT_5hasex | WT_veg | OK | 23,4649 | 62,6603 | 1,41705  | -2,89973 | 0,00373487  | 0,0234634   | yes |
| AN5986 | Chrl_A_nidulans_FGSC_A4:1585354-1586666 | WT_5hasex | WT_veg | OK | 34,5081 | 146,898 | 2,0898   | -4,04386 | 5,25786E-05 | 0,000624909 | yes |

## Supplementary table 2

|        |                                         |           |        |    |          |         |          |          |             |             |     |
|--------|-----------------------------------------|-----------|--------|----|----------|---------|----------|----------|-------------|-------------|-----|
| AN5994 | Chrl_A_nidulans_FGSC_A4:1561061-1562440 | WT_5hasex | WT_veg | OK | 127,839  | 470,642 | 1,8803   | -3,90796 | 9,30788E-05 | 0,00103097  | yes |
| AN5995 | Chrl_A_nidulans_FGSC_A4:1559190-1560804 | WT_5hasex | WT_veg | OK | 43,3404  | 180,559 | 2,05869  | -4,19275 | 2,75599E-05 | 0,000355362 | yes |
| AN5998 | Chrl_A_nidulans_FGSC_A4:1554946-1556578 | WT_5hasex | WT_veg | OK | 5,67408  | 29,6131 | 2,38377  | -3,74034 | 0,00018377  | 0,00185354  | yes |
| AN5999 | Chrl_A_nidulans_FGSC_A4:1550370-1554465 | WT_5hasex | WT_veg | OK | 44,7091  | 110,765 | 1,30886  | -2,7109  | 0,00671016  | 0,0378662   | yes |
| AN6005 | Chrl_A_nidulans_FGSC_A4:1534356-1534752 | WT_5hasex | WT_veg | OK | 149,462  | 614,577 | 2,03981  | -4,12676 | 3,67907E-05 | 0,000458697 | yes |
| AN6006 | Chrl_A_nidulans_FGSC_A4:1529852-1533437 | WT_5hasex | WT_veg | OK | 37,0457  | 142,509 | 1,94368  | -4,00671 | 6,15701E-05 | 0,000718894 | yes |
| AN6009 | Chrl_A_nidulans_FGSC_A4:1521532-1524336 | WT_5hasex | WT_veg | OK | 68,4382  | 186,161 | 1,44368  | -2,98957 | 0,00279368  | 0,0184172   | yes |
| AN6032 | Chrl_A_nidulans_FGSC_A4:1452229-1453894 | WT_5hasex | WT_veg | OK | 20,0806  | 133,35  | 2,73135  | -5,15839 | 2,49087E-07 | 5,29091E-06 | yes |
| AN6059 | Chrl_A_nidulans_FGSC_A4:1389796-1390836 | WT_5hasex | WT_veg | OK | 101,413  | 297,609 | 1,55318  | -3,23917 | 0,00119877  | 0,00911596  | yes |
| AN6060 | Chrl_A_nidulans_FGSC_A4:1382777-1388362 | WT_5hasex | WT_veg | OK | 58,3494  | 327,547 | 2,48891  | -4,89959 | 9,60392E-07 | 1,76717E-05 | yes |
| AN6067 | Chrl_A_nidulans_FGSC_A4:1365444-1367514 | WT_5hasex | WT_veg | OK | 194,758  | 547,519 | 1,49123  | -2,87453 | 0,00404633  | 0,0250013   | yes |
| AN6070 | Chrl_A_nidulans_FGSC_A4:1350607-1353881 | WT_5hasex | WT_veg | OK | 16,0507  | 49,5345 | 1,6258   | -3,26721 | 0,00108614  | 0,00841079  | yes |
| AN6085 | Chrl_A_nidulans_FGSC_A4:1305960-1308504 | WT_5hasex | WT_veg | OK | 15,7136  | 45,756  | 1,54195  | -2,98319 | 0,00285257  | 0,0187295   | yes |
| AN6092 | Chrl_A_nidulans_FGSC_A4:1281951-1284453 | WT_5hasex | WT_veg | OK | 30,0374  | 76,1698 | 1,34246  | -2,71137 | 0,00670065  | 0,0378289   | yes |
| AN6104 | Chrl_A_nidulans_FGSC_A4:1247184-1248592 | WT_5hasex | WT_veg | OK | 137,29   | 1137,41 | 3,05045  | -5,76232 | 8,29649E-09 | 2,44793E-07 | yes |
| AN6110 | Chrl_A_nidulans_FGSC_A4:1229393-1230337 | WT_5hasex | WT_veg | OK | 64,0949  | 171,917 | 1,42343  | -2,85094 | 0,00435898  | 0,0266347   | yes |
| AN6111 | Chrl_A_nidulans_FGSC_A4:1228182-1229231 | WT_5hasex | WT_veg | OK | 73,0001  | 216,048 | 1,56538  | -3,15856 | 0,00158552  | 0,0115076   | yes |
| AN6112 | Chrl_A_nidulans_FGSC_A4:1223342-1227523 | WT_5hasex | WT_veg | OK | 28,5877  | 75,1297 | 1,39399  | -2,91017 | 0,00361236  | 0,0228222   | yes |
| AN6116 | Chrl_A_nidulans_FGSC_A4:1214810-1215806 | WT_5hasex | WT_veg | OK | 9,72039  | 46,183  | 2,24827  | -3,16306 | 0,00156123  | 0,0113595   | yes |
| AN6123 | Chrl_A_nidulans_FGSC_A4:1190759-1192308 | WT_5hasex | WT_veg | OK | 14,1283  | 39,9606 | 1,49999  | -2,73535 | 0,00623148  | 0,0356253   | yes |
| AN6128 | Chrl_A_nidulans_FGSC_A4:1165559-1167047 | WT_5hasex | WT_veg | OK | 20,4109  | 5,33294 | -1,93633 | 3,22061  | 0,00127918  | 0,00961716  | yes |
| AN6132 | Chrl_A_nidulans_FGSC_A4:1139168-1143308 | WT_5hasex | WT_veg | OK | 39,148   | 95,081  | 1,28022  | -2,6693  | 0,00760084  | 0,0418513   | yes |
| AN6144 | Chrl_A_nidulans_FGSC_A4:1102634-1103425 | WT_5hasex | WT_veg | OK | 0,944806 | 12,6402 | 3,74186  | -3,57304 | 0,000352866 | 0,00323041  | yes |
| AN6149 | Chrl_A_nidulans_FGSC_A4:1091592-1093622 | WT_5hasex | WT_veg | OK | 12,5224  | 51,1849 | 2,03121  | -3,72009 | 0,000199154 | 0,00198556  | yes |
| AN6164 | Chrl_A_nidulans_FGSC_A4:1042470-1050676 | WT_5hasex | WT_veg | OK | 8,38591  | 28,5702 | 1,76847  | -3,57726 | 0,00034721  | 0,00318587  | yes |
| AN6165 | Chrl_A_nidulans_FGSC_A4:1039832-1041740 | WT_5hasex | WT_veg | OK | 27,5165  | 110,477 | 2,00537  | -4,05148 | 5,08955E-05 | 0,000607661 | yes |
| AN6166 | Chrl_A_nidulans_FGSC_A4:1037691-1039495 | WT_5hasex | WT_veg | OK | 52,5141  | 247,712 | 2,23789  | -4,64639 | 3,37802E-06 | 5,46342E-05 | yes |
| AN6171 | Chrl_A_nidulans_FGSC_A4:1024067-1024816 | WT_5hasex | WT_veg | OK | 25,9039  | 218,809 | 3,07843  | -5,16958 | 2,34615E-07 | 5,01989E-06 | yes |
| AN6175 | Chrl_A_nidulans_FGSC_A4:1015309-1016372 | WT_5hasex | WT_veg | OK | 28,3448  | 82,7807 | 1,54621  | -2,95306 | 0,00314645  | 0,0203405   | yes |
| AN6183 | Chrl_A_nidulans_FGSC_A4:1002629-1003914 | WT_5hasex | WT_veg | OK | 65,2536  | 160,553 | 1,29892  | -2,68115 | 0,00733701  | 0,0406679   | yes |
| AN6192 | Chrl_A_nidulans_FGSC_A4:981028-984487   | WT_5hasex | WT_veg | OK | 19,756   | 180,708 | 3,19329  | -6,24517 | 4,23348E-10 | 1,59255E-08 | yes |
| AN6196 | Chrl_A_nidulans_FGSC_A4:955885-956784   | WT_5hasex | WT_veg | OK | 18,6326  | 90,0468 | 2,27285  | -3,87    | 0,000108835 | 0,00118225  | yes |
| AN6200 | Chrl_A_nidulans_FGSC_A4:944626-948705   | WT_5hasex | WT_veg | OK | 9,13657  | 52,7953 | 2,53068  | -4,85324 | 1,21462E-06 | 2,18422E-05 | yes |
| AN6203 | Chrl_A_nidulans_FGSC_A4:926991-927705   | WT_5hasex | WT_veg | OK | 209,127  | 2332,74 | 3,47958  | -7,04959 | 1,79456E-12 | 9,6549E-11  | yes |
| AN6225 | Chrl_A_nidulans_FGSC_A4:850238-850877   | WT_5hasex | WT_veg | OK | 154,477  | 525,282 | 1,7657   | -3,62687 | 0,000286874 | 0,00271644  | yes |
| AN6227 | Chrl_A_nidulans_FGSC_A4:843381-844901   | WT_5hasex | WT_veg | OK | 82,3081  | 311,377 | 1,91956  | -3,80241 | 0,000143293 | 0,00149549  | yes |
| AN6228 | Chrl_A_nidulans_FGSC_A4:838121-843228   | WT_5hasex | WT_veg | OK | 20,229   | 80,9103 | 1,99989  | -4,20323 | 2,63128E-05 | 0,000340623 | yes |
| AN6233 | Chrl_A_nidulans_FGSC_A4:811499-812467   | WT_5hasex | WT_veg | OK | 18,0618  | 58,2247 | 1,68869  | -2,94885 | 0,00318955  | 0,0205684   | yes |
| AN6235 | Chrl_A_nidulans_FGSC_A4:804516-805330   | WT_5hasex | WT_veg | OK | 24,1958  | 5,31243 | -2,18731 | 3,12391  | 0,00178465  | 0,0127031   | yes |
| AN6236 | Chrl_A_nidulans_FGSC_A4:797657-804024   | WT_5hasex | WT_veg | OK | 12,9608  | 2,96456 | -2,12826 | 4,25653  | 0,000020762 | 0,000275506 | yes |
| AN6237 | Chrl_A_nidulans_FGSC_A4:793305-797305   | WT_5hasex | WT_veg | OK | 14,6703  | 3,41795 | -2,1017  | 4,03577  | 0,000054424 | 0,000644941 | yes |
| AN6241 | Chrl_A_nidulans_FGSC_A4:784741-787015   | WT_5hasex | WT_veg | OK | 112,05   | 452,268 | 2,01304  | -4,00242 | 6,26968E-05 | 0,00073026  | yes |
| AN6245 | Chrl_A_nidulans_FGSC_A4:770658-771525   | WT_5hasex | WT_veg | OK | 50,0078  | 227,908 | 2,18823  | -4,30085 | 1,70144E-05 | 0,000231929 | yes |
| AN6250 | Chrl_A_nidulans_FGSC_A4:756139-758659   | WT_5hasex | WT_veg | OK | 39,807   | 119,675 | 1,58803  | -3,28531 | 0,00101868  | 0,00797924  | yes |
| AN6251 | Chrl_A_nidulans_FGSC_A4:752191-753517   | WT_5hasex | WT_veg | OK | 68,495   | 239,977 | 1,80882  | -3,68076 | 0,000232543 | 0,00226753  | yes |
| AN6252 | Chrl_A_nidulans_FGSC_A4:750359-751927   | WT_5hasex | WT_veg | OK | 43,1353  | 114,14  | 1,40386  | -2,876   | 0,0040275   | 0,0249114   | yes |

## Supplementary table 2

|        |                                         |           |        |    |         |         |          |          |             |             |     |
|--------|-----------------------------------------|-----------|--------|----|---------|---------|----------|----------|-------------|-------------|-----|
| AN6265 | Chrl_A_nidulans_FGSC_A4:710385-712407   | WT_5hasex | WT_veg | OK | 11,7466 | 111,061 | 3,24103  | -5,88251 | 4,04081E-09 | 1,26772E-07 | yes |
| AN6266 | Chrl_A_nidulans_FGSC_A4:707467-710134   | WT_5hasex | WT_veg | OK | 12,9043 | 75,3984 | 2,54668  | -4,84256 | 1,28179E-06 | 2,29636E-05 | yes |
| AN6267 | Chrl_A_nidulans_FGSC_A4:705986-707456   | WT_5hasex | WT_veg | OK | 90,8977 | 262,133 | 1,52798  | -3,16319 | 0,0015605   | 0,0113558   | yes |
| AN6268 | Chrl_A_nidulans_FGSC_A4:702841-705753   | WT_5hasex | WT_veg | OK | 33,6917 | 96,299  | 1,51513  | -3,17154 | 0,00151632  | 0,011099    | yes |
| AN6274 | Chrl_A_nidulans_FGSC_A4:690221-691165   | WT_5hasex | WT_veg | OK | 195,339 | 1172,09 | 2,58502  | -4,92103 | 8,60896E-07 | 0,000016083 | yes |
| AN6276 | Chrl_A_nidulans_FGSC_A4:684418-685556   | WT_5hasex | WT_veg | OK | 58,4749 | 157,402 | 1,42857  | -2,84049 | 0,00450437  | 0,0273699   | yes |
| AN6277 | Chrl_A_nidulans_FGSC_A4:681406-683914   | WT_5hasex | WT_veg | OK | 158,076 | 596,749 | 1,9165   | -3,49469 | 0,000474611 | 0,00416383  | yes |
| AN6286 | Chrl_A_nidulans_FGSC_A4:649937-653698   | WT_5hasex | WT_veg | OK | 109,905 | 588,799 | 2,42152  | -4,16002 | 3,18223E-05 | 0,000404256 | yes |
| AN6290 | Chrl_A_nidulans_FGSC_A4:642444-643374   | WT_5hasex | WT_veg | OK | 17,4526 | 136,714 | 2,96964  | -5,19522 | 2,04478E-07 | 4,44608E-06 | yes |
| AN6295 | Chrl_A_nidulans_FGSC_A4:628000-629672   | WT_5hasex | WT_veg | OK | 19,0498 | 59,2917 | 1,63805  | -3,00211 | 0,00268115  | 0,0177957   | yes |
| AN6301 | Chrl_A_nidulans_FGSC_A4:614103-615496   | WT_5hasex | WT_veg | OK | 116,454 | 883,31  | 2,92316  | -5,98045 | 2,22521E-09 | 7,29698E-08 | yes |
| AN6308 | Chrl_A_nidulans_FGSC_A4:599782-600947   | WT_5hasex | WT_veg | OK | 29,2606 | 77,9916 | 1,41436  | -2,7     | 0,00693401  | 0,038845    | yes |
| AN6310 | Chrl_A_nidulans_FGSC_A4:583071-597892   | WT_5hasex | WT_veg | OK | 2,51575 | 9,45228 | 1,90967  | -3,83856 | 0,000123758 | 0,00132296  | yes |
| AN6322 | Chrl_A_nidulans_FGSC_A4:540148-541957   | WT_5hasex | WT_veg | OK | 24,0412 | 70,8072 | 1,55839  | -3,04678 | 0,00231308  | 0,0157498   | yes |
| AN6334 | Chrl_A_nidulans_FGSC_A4:492293-496043   | WT_5hasex | WT_veg | OK | 14,208  | 90,1522 | 2,66566  | -5,41438 | 6,15017E-08 | 1,50669E-06 | yes |
| AN6347 | Chrl_A_nidulans_FGSC_A4:451659-453735   | WT_5hasex | WT_veg | OK | 36,9982 | 114,855 | 1,63428  | -3,30836 | 0,000938457 | 0,00745446  | yes |
| AN6348 | Chrl_A_nidulans_FGSC_A4:449578-450252   | WT_5hasex | WT_veg | OK | 94,9734 | 402,862 | 2,08469  | -4,16235 | 3,14991E-05 | 0,000400441 | yes |
| AN6349 | Chrl_A_nidulans_FGSC_A4:443629-449186   | WT_5hasex | WT_veg | OK | 12,5079 | 30,1837 | 1,27093  | -2,62368 | 0,00869862  | 0,0466556   | yes |
| AN6350 | Chrl_A_nidulans_FGSC_A4:442486-443386   | WT_5hasex | WT_veg | OK | 2,34134 | 10,7687 | 2,20144  | -2,82827 | 0,00468005  | 0,0282117   | yes |
| AN6351 | Chrl_A_nidulans_FGSC_A4:439880-442269   | WT_5hasex | WT_veg | OK | 48,6441 | 120,258 | 1,30579  | -2,70511 | 0,00682826  | 0,0383757   | yes |
| AN6354 | Chrl_A_nidulans_FGSC_A4:430984-435765   | WT_5hasex | WT_veg | OK | 18,7092 | 89,9565 | 2,26548  | -4,75315 | 2,00275E-06 | 3,44319E-05 | yes |
| AN6362 | Chrl_A_nidulans_FGSC_A4:411742-412369   | WT_5hasex | WT_veg | OK | 19,0488 | 79,2528 | 2,05676  | -3,27992 | 0,00103836  | 0,00810666  | yes |
| AN6367 | Chrl_A_nidulans_FGSC_A4:401621-404172   | WT_5hasex | WT_veg | OK | 314,386 | 1027,61 | 1,70868  | -3,32835 | 0,000873634 | 0,00700967  | yes |
| AN6368 | Chrl_A_nidulans_FGSC_A4:398977-401265   | WT_5hasex | WT_veg | OK | 67,3789 | 199,101 | 1,56313  | -3,24042 | 0,00119353  | 0,00908799  | yes |
| AN6369 | Chrl_A_nidulans_FGSC_A4:395743-398043   | WT_5hasex | WT_veg | OK | 8,96489 | 34,6382 | 1,95001  | -3,09151 | 0,00199139  | 0,0139267   | yes |
| AN6370 | Chrl_A_nidulans_FGSC_A4:391695-394028   | WT_5hasex | WT_veg | OK | 45,9882 | 254,136 | 2,46626  | -5,08186 | 3,73757E-07 | 7,63274E-06 | yes |
| AN6374 | Chrl_A_nidulans_FGSC_A4:378989-380985   | WT_5hasex | WT_veg | OK | 10,7457 | 92,1306 | 3,09992  | -5,51703 | 3,44772E-08 | 8,87441E-07 | yes |
| AN6379 | Chrl_A_nidulans_FGSC_A4:364852-367063   | WT_5hasex | WT_veg | OK | 19,5694 | 87,9876 | 2,1687   | -3,9158  | 9,01041E-05 | 0,0010029   | yes |
| AN6397 | Chrl_A_nidulans_FGSC_A4:308116-309876   | WT_5hasex | WT_veg | OK | 18,39   | 181,394 | 3,30214  | -6,32691 | 2,50118E-10 | 9,75204E-09 | yes |
| AN6398 | Chrl_A_nidulans_FGSC_A4:306712-307706   | WT_5hasex | WT_veg | OK | 36,1032 | 136,234 | 1,91588  | -3,5972  | 0,000321667 | 0,00298856  | yes |
| AN6400 | Chrl_A_nidulans_FGSC_A4:299999-302568   | WT_5hasex | WT_veg | OK | 13,1739 | 2,10873 | -2,64324 | 3,9656   | 7,32118E-05 | 0,000835099 | yes |
| AN6401 | Chrl_A_nidulans_FGSC_A4:298404-298947   | WT_5hasex | WT_veg | OK | 929,352 | 28,7111 | -5,01655 | 6,74785  | 1,50053E-11 | 6,95234E-10 | yes |
| AN6412 | Chrl_A_nidulans_FGSC_A4:267478-269222   | WT_5hasex | WT_veg | OK | 133,334 | 428,135 | 1,68302  | -3,11266 | 0,00185407  | 0,0131063   | yes |
| AN6422 | Chrl_A_nidulans_FGSC_A4:236546-237561   | WT_5hasex | WT_veg | OK | 4,66075 | 19,4548 | 2,06149  | -2,85008 | 0,00437077  | 0,0266974   | yes |
| AN6426 | Chrl_A_nidulans_FGSC_A4:229008-230268   | WT_5hasex | WT_veg | OK | 220,619 | 45,6754 | -2,27207 | 4,50491  | 6,64007E-06 | 9,97286E-05 | yes |
| AN6440 | Chrl_A_nidulans_FGSC_A4:172566-173948   | WT_5hasex | WT_veg | OK | 8,29027 | 27,0836 | 1,70793  | -2,71589 | 0,00660972  | 0,0374244   | yes |
| AN6441 | Chrl_A_nidulans_FGSC_A4:170813-171984   | WT_5hasex | WT_veg | OK | 18,3168 | 179,736 | 3,29464  | -5,62976 | 1,80461E-08 | 4,94071E-07 | yes |
| AN6470 | Chrl_A_nidulans_FGSC_A4:51785-52573     | WT_5hasex | WT_veg | OK | 33,694  | 2,59798 | -3,69703 | 4,10397  | 4,06124E-05 | 0,000499687 | yes |
| AN6477 | Chrl_A_nidulans_FGSC_A4:24752-26659     | WT_5hasex | WT_veg | OK | 110,534 | 4,10222 | -4,75194 | 7,40241  | 1,33671E-13 | 8,34877E-12 | yes |
| AN6478 | Chrl_A_nidulans_FGSC_A4:22400-23183     | WT_5hasex | WT_veg | OK | 1,67387 | 18,3353 | 3,45337  | -3,39372 | 0,000689495 | 0,00572054  | yes |
| AN6488 | Chrl_A_nidulans_FGSC_A4:2274285-2275804 | WT_5hasex | WT_veg | OK | 60,3157 | 150,732 | 1,32138  | -2,71762 | 0,00657539  | 0,0372703   | yes |
| AN6489 | Chrl_A_nidulans_FGSC_A4:2276158-2277277 | WT_5hasex | WT_veg | OK | 103,574 | 263,945 | 1,34957  | -2,79139 | 0,00524825  | 0,0309253   | yes |
| AN6490 | Chrl_A_nidulans_FGSC_A4:2277390-2280158 | WT_5hasex | WT_veg | OK | 112,498 | 306,462 | 1,4458   | -2,88472 | 0,00391757  | 0,0243724   | yes |
| AN6491 | Chrl_A_nidulans_FGSC_A4:2277390-2280158 | WT_5hasex | WT_veg | OK | 59,5102 | 657,127 | 3,46496  | -6,87679 | 6,12155E-12 | 3,04636E-10 | yes |
| AN6495 | Chrl_A_nidulans_FGSC_A4:2289312-2290151 | WT_5hasex | WT_veg | OK | 22,9505 | 78,9669 | 1,78272  | -3,10971 | 0,0018727   | 0,0132041   | yes |
| AN6497 | Chrl_A_nidulans_FGSC_A4:2293535-2294109 | WT_5hasex | WT_veg | OK | 69,0545 | 409,12  | 2,56672  | -4,7963  | 1,61625E-06 | 2,83734E-05 | yes |



## Supplementary table 2

|        |                                         |           |        |    |          |         |          |          |             |             |     |
|--------|-----------------------------------------|-----------|--------|----|----------|---------|----------|----------|-------------|-------------|-----|
| AN6506 | Chrl_A_nidulans_FGSC_A4:2316941-2318172 | WT_5hasex | WT_veg | OK | 163,869  | 392,105 | 1,2587   | -2,59577 | 0,0094378   | 0,0497643   | yes |
| AN6510 | Chrl_A_nidulans_FGSC_A4:2331317-2333269 | WT_5hasex | WT_veg | OK | 153,247  | 490,701 | 1,67898  | -3,34285 | 0,000829236 | 0,00669547  | yes |
| AN6513 | Chrl_A_nidulans_FGSC_A4:2341098-2342545 | WT_5hasex | WT_veg | OK | 14,3551  | 42,2113 | 1,55607  | -2,78725 | 0,00531573  | 0,0312457   | yes |
| AN6529 | Chrl_A_nidulans_FGSC_A4:2381906-2384115 | WT_5hasex | WT_veg | OK | 5,4549   | 19,4965 | 1,83759  | -2,93033 | 0,00338607  | 0,0216466   | yes |
| AN6537 | Chrl_A_nidulans_FGSC_A4:2405111-2405919 | WT_5hasex | WT_veg | OK | 44,964   | 256,243 | 2,51067  | -4,78276 | 1,72908E-06 | 3,01221E-05 | yes |
| AN6540 | Chrl_A_nidulans_FGSC_A4:2412701-2415128 | WT_5hasex | WT_veg | OK | 11,8786  | 49,0515 | 2,04594  | -3,81822 | 0,000134416 | 0,00142038  | yes |
| AN6548 | Chrl_A_nidulans_FGSC_A4:2428984-2429957 | WT_5hasex | WT_veg | OK | 39,2496  | 104,696 | 1,41545  | -2,6172  | 0,0088655   | 0,0473954   | yes |
| AN6556 | Chrl_A_nidulans_FGSC_A4:2451840-2452516 | WT_5hasex | WT_veg | OK | 23,1396  | 109,233 | 2,23897  | -3,63965 | 0,000273008 | 0,0026016   | yes |
| AN6558 | Chrl_A_nidulans_FGSC_A4:2454137-2454829 | WT_5hasex | WT_veg | OK | 22,6043  | 111,465 | 2,30193  | -3,60509 | 0,000312047 | 0,00291685  | yes |
| AN6561 | Chrl_A_nidulans_FGSC_A4:2462125-2463264 | WT_5hasex | WT_veg | OK | 15,0495  | 75,301  | 2,32295  | -3,97006 | 7,18534E-05 | 0,000822109 | yes |
| AN6562 | Chrl_A_nidulans_FGSC_A4:2463800-2465660 | WT_5hasex | WT_veg | OK | 6,53769  | 27,2331 | 2,05851  | -3,403   | 0,000666494 | 0,00555344  | yes |
| AN6571 | Chrl_A_nidulans_FGSC_A4:2487389-2489020 | WT_5hasex | WT_veg | OK | 11,184   | 46,274  | 2,04876  | -3,58092 | 0,000342384 | 0,0031493   | yes |
| AN6574 | Chrl_A_nidulans_FGSC_A4:2493385-2495920 | WT_5hasex | WT_veg | OK | 27,5326  | 87,401  | 1,66651  | -3,41552 | 0,000636612 | 0,00534612  | yes |
| AN6576 | Chrl_A_nidulans_FGSC_A4:2501190-2501908 | WT_5hasex | WT_veg | OK | 120,241  | 328,363 | 1,44936  | -2,97789 | 0,0029024   | 0,0190091   | yes |
| AN6577 | Chrl_A_nidulans_FGSC_A4:2504203-2506610 | WT_5hasex | WT_veg | OK | 14,2061  | 43,5079 | 1,61477  | -3,11841 | 0,00181829  | 0,0128812   | yes |
| AN6581 | Chrl_A_nidulans_FGSC_A4:2523954-2528508 | WT_5hasex | WT_veg | OK | 8,28635  | 22,3886 | 1,43396  | -2,82625 | 0,00470962  | 0,0283573   | yes |
| AN6585 | Chrl_A_nidulans_FGSC_A4:2536299-2540026 | WT_5hasex | WT_veg | OK | 4,61969  | 24,3536 | 2,39827  | -4,17569 | 2,97083E-05 | 0,000380629 | yes |
| AN6586 | Chrl_A_nidulans_FGSC_A4:2540197-2540815 | WT_5hasex | WT_veg | OK | 23,648   | 91,9342 | 1,95888  | -3,37767 | 0,000731028 | 0,00601371  | yes |
| AN6590 | Chrl_A_nidulans_FGSC_A4:2557766-2562479 | WT_5hasex | WT_veg | OK | 20,9652  | 71,9259 | 1,77851  | -3,68373 | 0,000229845 | 0,00224624  | yes |
| AN6594 | Chrl_A_nidulans_FGSC_A4:2570316-2571599 | WT_5hasex | WT_veg | OK | 19,4633  | 61,8612 | 1,66828  | -3,05731 | 0,00223337  | 0,0153134   | yes |
| AN6597 | Chrl_A_nidulans_FGSC_A4:2578473-2579896 | WT_5hasex | WT_veg | OK | 37,4153  | 143,65  | 1,94086  | -3,81025 | 0,000138824 | 0,00145668  | yes |
| AN6601 | Chrl_A_nidulans_FGSC_A4:2590989-2593061 | WT_5hasex | WT_veg | OK | 59,9042  | 157,512 | 1,39474  | -2,91919 | 0,00350944  | 0,0223101   | yes |
| AN6612 | Chrl_A_nidulans_FGSC_A4:2621274-2622354 | WT_5hasex | WT_veg | OK | 24,8371  | 185,158 | 2,89819  | -5,17938 | 2,2262E-07  | 4,79677E-06 | yes |
| AN6633 | Chrl_A_nidulans_FGSC_A4:2683974-2684394 | WT_5hasex | WT_veg | OK | 497,524  | 5549,39 | 3,47949  | -7,00134 | 2,53531E-12 | 1,32855E-10 | yes |
| AN6634 | Chrl_A_nidulans_FGSC_A4:2685202-2686534 | WT_5hasex | WT_veg | OK | 10,6942  | 93,7242 | 3,1316   | -5,32536 | 1,00756E-07 | 2,34449E-06 | yes |
| AN6646 | Chrl_A_nidulans_FGSC_A4:2721339-2722272 | WT_5hasex | WT_veg | OK | 38,0562  | 102,564 | 1,43032  | -2,76776 | 0,00564428  | 0,0328198   | yes |
| AN6651 | Chrl_A_nidulans_FGSC_A4:2734372-2738239 | WT_5hasex | WT_veg | OK | 20,4876  | 196,855 | 3,26431  | -6,72893 | 1,70917E-11 | 7,84342E-10 | yes |
| AN6657 | Chrl_A_nidulans_FGSC_A4:2751297-2751944 | WT_5hasex | WT_veg | OK | 2246,93  | 516,92  | -2,11994 | 3,54421  | 0,000393787 | 0,0035474   | yes |
| AN6668 | Chrl_A_nidulans_FGSC_A4:2785296-2786471 | WT_5hasex | WT_veg | OK | 0,958339 | 6,06704 | 2,66238  | -2,75349 | 0,00589642  | 0,0339916   | yes |
| AN6676 | Chrl_A_nidulans_FGSC_A4:2813445-2815674 | WT_5hasex | WT_veg | OK | 49,1991  | 155,853 | 1,66348  | -3,40582 | 0,000659655 | 0,00550609  | yes |
| AN6687 | Chrl_A_nidulans_FGSC_A4:2849260-2851640 | WT_5hasex | WT_veg | OK | 80,5654  | 222,372 | 1,46474  | -3,0116  | 0,00259875  | 0,0173468   | yes |
| AN6690 | Chrl_A_nidulans_FGSC_A4:2858921-2860280 | WT_5hasex | WT_veg | OK | 44,6013  | 191,403 | 2,10146  | -4,20771 | 2,57977E-05 | 0,000334451 | yes |
| AN6698 | Chrl_A_nidulans_FGSC_A4:2888379-2889761 | WT_5hasex | WT_veg | OK | 36,1611  | 220,485 | 2,60817  | -5,09906 | 3,41339E-07 | 7,04206E-06 | yes |
| AN6700 | Chrl_A_nidulans_FGSC_A4:2894421-2897319 | WT_5hasex | WT_veg | OK | 282,311  | 2146,49 | 2,92662  | -4,83404 | 1,33789E-06 | 2,38658E-05 | yes |
| AN6701 | Chrl_A_nidulans_FGSC_A4:2900579-2901699 | WT_5hasex | WT_veg | OK | 85,6842  | 301,466 | 1,81489  | -3,73348 | 0,00018885  | 0,00189732  | yes |
| AN6706 | Chrl_A_nidulans_FGSC_A4:2916856-2918941 | WT_5hasex | WT_veg | OK | 11,1918  | 36,1063 | 1,68981  | -3,09463 | 0,00197059  | 0,0138107   | yes |
| AN6711 | Chrl_A_nidulans_FGSC_A4:2931249-2933307 | WT_5hasex | WT_veg | OK | 79,7615  | 386,373 | 2,27623  | -4,64936 | 3,32964E-06 | 5,40018E-05 | yes |
| AN6725 | Chrl_A_nidulans_FGSC_A4:2990055-2991474 | WT_5hasex | WT_veg | OK | 21,0662  | 74,6457 | 1,82513  | -3,41166 | 0,00064568  | 0,00540926  | yes |
| AN6742 | Chrl_A_nidulans_FGSC_A4:3038674-3040973 | WT_5hasex | WT_veg | OK | 15,7218  | 5,40171 | -1,54128 | 2,75554  | 0,00585946  | 0,0338321   | yes |
| AN6750 | Chrl_A_nidulans_FGSC_A4:3057395-3058870 | WT_5hasex | WT_veg | OK | 94,4096  | 17,5253 | -2,42949 | 4,37641  | 0,000012065 | 0,000169771 | yes |
| AN6769 | Chrl_A_nidulans_FGSC_A4:3107451-3109092 | WT_5hasex | WT_veg | OK | 17,8761  | 77,7466 | 2,12075  | -3,54807 | 0,000388064 | 0,00350127  | yes |
| AN6770 | Chrl_A_nidulans_FGSC_A4:3110920-3112895 | WT_5hasex | WT_veg | OK | 4,58905  | 21,4886 | 2,2273   | -2,82333 | 0,0047528   | 0,0285779   | yes |
| AN6774 | Chrl_A_nidulans_FGSC_A4:3120967-3122558 | WT_5hasex | WT_veg | OK | 11,918   | 73,4039 | 2,62271  | -4,48106 | 7,42725E-06 | 0,000110443 | yes |
| AN6778 | Chrl_A_nidulans_FGSC_A4:3135796-3137655 | WT_5hasex | WT_veg | OK | 1,47059  | 6,15039 | 2,06429  | -2,62185 | 0,00874538  | 0,0468632   | yes |
| AN6779 | Chrl_A_nidulans_FGSC_A4:3139889-3144575 | WT_5hasex | WT_veg | OK | 25,3268  | 245,45  | 3,2767   | -6,72077 | 1,80762E-11 | 8,24597E-10 | yes |
| AN6783 | Chrl_A_nidulans_FGSC_A4:3153273-3155066 | WT_5hasex | WT_veg | OK | 13,8274  | 46,5273 | 1,75055  | -3,12051 | 0,00180538  | 0,0128088   | yes |

## Supplementary table 2

|        |                                          |           |        |    |         |         |          |          |             |             |     |
|--------|------------------------------------------|-----------|--------|----|---------|---------|----------|----------|-------------|-------------|-----|
| AN6791 | Chrl_A_nidulans_FGSC_A4:3181547-3189431  | WT_5hasex | WT_veg | OK | 1,33517 | 5,89848 | 2,14332  | -3,39365 | 0,000689676 | 0,00572114  | yes |
| AN6797 | Chrl_A_nidulans_FGSC_A4:3202191-3202613  | WT_5hasex | WT_veg | OK | 8,27689 | 45,9221 | 2,47203  | -2,83037 | 0,00464948  | 0,0280629   | yes |
| AN6801 | Chrl_A_nidulans_FGSC_A4:3213005-3213786  | WT_5hasex | WT_veg | OK | 9,56059 | 42,149  | 2,14033  | -3,27585 | 0,00105344  | 0,00819631  | yes |
| AN6802 | Chrl_A_nidulans_FGSC_A4:3219506-3221568  | WT_5hasex | WT_veg | OK | 1,53111 | 6,9099  | 2,17409  | -2,67211 | 0,00753753  | 0,0415858   | yes |
| AN6804 | Chrl_A_nidulans_FGSC_A4:3225930-3228749  | WT_5hasex | WT_veg | OK | 19,3982 | 218,445 | 3,49328  | -6,78445 | 1,16533E-11 | 5,50143E-10 | yes |
| AN6805 | Chrl_A_nidulans_FGSC_A4:3237764-3239652  | WT_5hasex | WT_veg | OK | 6,62203 | 20,6139 | 1,63827  | -2,61154 | 0,00901342  | 0,048016    | yes |
| AN6816 | Chrl_A_nidulans_FGSC_A4:3271019-3272895  | WT_5hasex | WT_veg | OK | 28,5661 | 75,7064 | 1,40611  | -2,8243  | 0,00473844  | 0,0285026   | yes |
| AN6820 | Chrl_A_nidulans_FGSC_A4:3277884-3281841  | WT_5hasex | WT_veg | OK | 47,5444 | 327,271 | 2,78314  | -5,23641 | 1,63734E-07 | 3,62484E-06 | yes |
| AN6822 | Chrl_A_nidulans_FGSC_A4:3285702-3287246  | WT_5hasex | WT_veg | OK | 6,58168 | 31,789  | 2,272    | -3,55385 | 0,00037964  | 0,00343591  | yes |
| AN6824 | Chrl_A_nidulans_FGSC_A4:3295384-3297729  | WT_5hasex | WT_veg | OK | 133,182 | 617,837 | 2,21382  | -4,22185 | 2,42301E-05 | 0,000316084 | yes |
| AN6831 | Chrl_A_nidulans_FGSC_A4:3318251-3320065  | WT_5hasex | WT_veg | OK | 19,0914 | 1,39996 | -3,76947 | 4,5512   | 5,33398E-06 | 8,20403E-05 | yes |
| AN6842 | Chrl_A_nidulans_FGSC_A4:3354665-3355971  | WT_5hasex | WT_veg | OK | 54,5035 | 137,045 | 1,33022  | -2,72981 | 0,00633717  | 0,0361547   | yes |
| AN6854 | Chrl_A_nidulans_FGSC_A4:3382774-3383294  | WT_5hasex | WT_veg | OK | 35,1275 | 122,173 | 1,79825  | -3,05381 | 0,00225957  | 0,0154678   | yes |
| AN6856 | Chrl_A_nidulans_FGSC_A4:3387757-3388378  | WT_5hasex | WT_veg | OK | 672,858 | 6049,1  | 3,16835  | -5,71992 | 1,06576E-08 | 3,07083E-07 | yes |
| AN6864 | Chrl_A_nidulans_FGSC_A4:3407292-3408961  | WT_5hasex | WT_veg | OK | 23,8512 | 83,5486 | 1,80855  | -3,59635 | 0,000322713 | 0,00299625  | yes |
| AN6865 | Chrl_A_nidulans_FGSC_A4:3409501-3410436  | WT_5hasex | WT_veg | OK | 35,469  | 115,952 | 1,7089   | -3,14759 | 0,0016462   | 0,0118691   | yes |
| AN6881 | Chrl_A_nidulans_FGSC_A4:3463446-3464372  | WT_5hasex | WT_veg | OK | 237,106 | 1433,28 | 2,59571  | -4,63611 | 3,55024E-06 | 5,70674E-05 | yes |
| AN6884 | Chrl_A_nidulans_FGSC_A4:3469375-3471729  | WT_5hasex | WT_veg | OK | 1,02161 | 6,43925 | 2,65604  | -3,19571 | 0,0013949   | 0,0103356   | yes |
| AN6887 | Chrl_A_nidulans_FGSC_A4:3477668-3479738  | WT_5hasex | WT_veg | OK | 12,9557 | 37,5912 | 1,53681  | -2,89204 | 0,00382753  | 0,0239458   | yes |
| AN6898 | Chrl_A_nidulans_FGSC_A4:3512679-3513878  | WT_5hasex | WT_veg | OK | 91,967  | 240,64  | 1,38769  | -2,83911 | 0,00452395  | 0,0274602   | yes |
| AN6899 | Chrl_A_nidulans_FGSC_A4:3515405-3517115  | WT_5hasex | WT_veg | OK | 15,2002 | 46,1338 | 1,60174  | -3,01066 | 0,00260683  | 0,0173884   | yes |
| AN6902 | Chrl_A_nidulans_FGSC_A4:3520704-3521597  | WT_5hasex | WT_veg | OK | 39,5348 | 243,525 | 2,62287  | -4,8387  | 1,30694E-06 | 2,33821E-05 | yes |
| AN6905 | Chrl_A_nidulans_FGSC_A4:3525020-3526061  | WT_5hasex | WT_veg | OK | 13,4668 | 43,7831 | 1,70097  | -2,75203 | 0,00592278  | 0,0341137   | yes |
| AN6914 | Chrl_A_nidulans_FGSC_A4:3551487-3552272  | WT_5hasex | WT_veg | OK | 92,7621 | 266,727 | 1,52376  | -3,1371  | 0,0017063   | 0,0122267   | yes |
| AN6915 | Chrl_A_nidulans_FGSC_A4:3552645-3554662  | WT_5hasex | WT_veg | OK | 44,3535 | 171,987 | 1,95518  | -4,02618 | 5,66915E-05 | 0,000668184 | yes |
| AN6931 | Chrl_A_nidulans_FGSC_A4:3615292-3616663  | WT_5hasex | WT_veg | OK | 15,8148 | 79,9815 | 2,33839  | -4,1954  | 2,72394E-05 | 0,000351663 | yes |
| AN6934 | Chrl_A_nidulans_FGSC_A4:3623160-3625051  | WT_5hasex | WT_veg | OK | 2,82666 | 13,9375 | 2,30181  | -3,27404 | 0,00106022  | 0,00824178  | yes |
| AN6940 | Chrl_A_nidulans_FGSC_A4:3643283-3644638  | WT_5hasex | WT_veg | OK | 34,3679 | 388,164 | 3,49753  | -5,87557 | 4,21392E-09 | 1,31504E-07 | yes |
| AN6941 | Chrl_A_nidulans_FGSC_A4:3645674-3646892  | WT_5hasex | WT_veg | OK | 44,5079 | 157,371 | 1,82203  | -2,99337 | 0,00275919  | 0,0182306   | yes |
| AN6944 | Chrl_A_nidulans_FGSC_A4:3654556-3656009  | WT_5hasex | WT_veg | OK | 6,1233  | 30,4595 | 2,31451  | -3,59716 | 0,000321714 | 0,00298856  | yes |
| AN6952 | Chrl_A_nidulans_FGSC_A4:3677359-3678853  | WT_5hasex | WT_veg | OK | 3,12044 | 13,4152 | 2,10405  | -2,92854 | 0,0034056   | 0,0217555   | yes |
| AN6973 | ChrIV_A_nidulans_FGSC_A4:1438934-1440314 | WT_5hasex | WT_veg | OK | 889,437 | 3485,61 | 1,97045  | -3,33453 | 0,000854425 | 0,00687766  | yes |
| AN6985 | ChrIV_A_nidulans_FGSC_A4:1396459-1398682 | WT_5hasex | WT_veg | OK | 39,2525 | 95,0265 | 1,27554  | -2,63115 | 0,00850959  | 0,0458246   | yes |
| AN6992 | ChrIV_A_nidulans_FGSC_A4:1370429-1372429 | WT_5hasex | WT_veg | OK | 172,195 | 505,608 | 1,55397  | -3,18427 | 0,00145122  | 0,0106837   | yes |
| AN6993 | ChrIV_A_nidulans_FGSC_A4:1370429-1372429 | WT_5hasex | WT_veg | OK | 37,7716 | 407,915 | 3,4329   | -6,78498 | 1,16103E-11 | 5,48603E-10 | yes |
| AN6996 | ChrIV_A_nidulans_FGSC_A4:1363581-1366020 | WT_5hasex | WT_veg | OK | 103,153 | 300,414 | 1,54216  | -2,93831 | 0,00330007  | 0,021182    | yes |
| AN6997 | ChrIV_A_nidulans_FGSC_A4:1362746-1363480 | WT_5hasex | WT_veg | OK | 9,39034 | 42,0891 | 2,1642   | -3,26354 | 0,00110031  | 0,00850042  | yes |
| AN7006 | ChrIV_A_nidulans_FGSC_A4:1341675-1342850 | WT_5hasex | WT_veg | OK | 16,018  | 80,0664 | 2,3215   | -4,0909  | 4,29698E-05 | 0,000525485 | yes |
| AN7011 | ChrIV_A_nidulans_FGSC_A4:1329617-1332058 | WT_5hasex | WT_veg | OK | 184,616 | 1437,49 | 2,96095  | -5,767   | 8,0696E-09  | 2,38771E-07 | yes |
| AN7017 | ChrIV_A_nidulans_FGSC_A4:1306234-1307415 | WT_5hasex | WT_veg | OK | 26,4169 | 115,597 | 2,12957  | -4,11527 | 3,86734E-05 | 0,00047898  | yes |
| AN7018 | ChrIV_A_nidulans_FGSC_A4:1304199-1305340 | WT_5hasex | WT_veg | OK | 396,324 | 1423,47 | 1,84466  | -3,304   | 0,000953159 | 0,00755177  | yes |
| AN7042 | ChrIV_A_nidulans_FGSC_A4:1217117-1218401 | WT_5hasex | WT_veg | OK | 92,9631 | 719,107 | 2,95148  | -5,65652 | 1,54477E-08 | 4,28528E-07 | yes |
| AN7053 | ChrIV_A_nidulans_FGSC_A4:1186736-1187625 | WT_5hasex | WT_veg | OK | 68,4721 | 12,9287 | -2,40494 | 4,23017  | 2,33515E-05 | 0,000305916 | yes |
| AN7093 | ChrIV_A_nidulans_FGSC_A4:1044824-1046271 | WT_5hasex | WT_veg | OK | 6,6249  | 34,3786 | 2,37554  | -3,59235 | 0,000327706 | 0,00303508  | yes |
| AN7102 | ChrIV_A_nidulans_FGSC_A4:1014766-1015760 | WT_5hasex | WT_veg | OK | 282,556 | 77,7483 | -1,86165 | 3,32905  | 0,000871417 | 0,0069951   | yes |
| AN7105 | ChrIV_A_nidulans_FGSC_A4:1000292-1003441 | WT_5hasex | WT_veg | OK | 103,683 | 316,234 | 1,60881  | -3,16226 | 0,00156552  | 0,011386    | yes |

## Supplementary table 2

|        |                                        |           |        |    |          |         |          |          |             |             |     |
|--------|----------------------------------------|-----------|--------|----|----------|---------|----------|----------|-------------|-------------|-----|
| AN7108 | ChrIV_A_nidulans_FGSC_A4:995641-996983 | WT_5hasex | WT_veg | OK | 122,153  | 468,789 | 1,94025  | -3,97437 | 7,05662E-05 | 0,000809503 | yes |
| AN7124 | ChrIV_A_nidulans_FGSC_A4:935193-935825 | WT_5hasex | WT_veg | OK | 3,81866  | 17,5976 | 2,20424  | -2,79355 | 0,00521324  | 0,030764    | yes |
| AN7128 | ChrIV_A_nidulans_FGSC_A4:922287-923115 | WT_5hasex | WT_veg | OK | 4,71841  | 30,8601 | 2,70937  | -3,40772 | 0,000655091 | 0,00547499  | yes |
| AN7138 | ChrIV_A_nidulans_FGSC_A4:877523-879437 | WT_5hasex | WT_veg | OK | 143,534  | 366,275 | 1,35153  | -2,75095 | 0,00594224  | 0,0342144   | yes |
| AN7139 | ChrIV_A_nidulans_FGSC_A4:875076-876869 | WT_5hasex | WT_veg | OK | 249,011  | 936,525 | 1,91111  | -3,63538 | 0,000277568 | 0,00263929  | yes |
| AN7143 | ChrIV_A_nidulans_FGSC_A4:867649-869175 | WT_5hasex | WT_veg | OK | 111,927  | 333,897 | 1,57684  | -3,07984 | 0,00207111  | 0,0143863   | yes |
| AN7144 | ChrIV_A_nidulans_FGSC_A4:866868-867401 | WT_5hasex | WT_veg | OK | 76,3123  | 206,389 | 1,43538  | -2,62742 | 0,00860362  | 0,0462365   | yes |
| AN7145 | ChrIV_A_nidulans_FGSC_A4:865146-866381 | WT_5hasex | WT_veg | OK | 29,19    | 86,5393 | 1,56788  | -3,05124 | 0,00227896  | 0,0155639   | yes |
| AN7149 | ChrIV_A_nidulans_FGSC_A4:857581-859129 | WT_5hasex | WT_veg | OK | 58,8719  | 273,29  | 2,21478  | -4,31713 | 1,58069E-05 | 0,000217348 | yes |
| AN7158 | ChrIV_A_nidulans_FGSC_A4:830822-832398 | WT_5hasex | WT_veg | OK | 278,969  | 948,37  | 1,76534  | -3,3536  | 0,000797684 | 0,00647708  | yes |
| AN7162 | ChrIV_A_nidulans_FGSC_A4:818305-819177 | WT_5hasex | WT_veg | OK | 12,061   | 79,9013 | 2,72787  | -4,09452 | 4,23046E-05 | 0,000518318 | yes |
| AN7164 | ChrIV_A_nidulans_FGSC_A4:811513-814211 | WT_5hasex | WT_veg | OK | 4,292    | 21,3541 | 2,31479  | -3,29107 | 0,000998063 | 0,00783881  | yes |
| AN7165 | ChrIV_A_nidulans_FGSC_A4:808449-810991 | WT_5hasex | WT_veg | OK | 40,9125  | 142,306 | 1,79838  | -3,6145  | 0,00030093  | 0,00282757  | yes |
| AN7172 | ChrIV_A_nidulans_FGSC_A4:783358-786621 | WT_5hasex | WT_veg | OK | 6,40565  | 29,168  | 2,18697  | -3,88471 | 0,000102452 | 0,00111918  | yes |
| AN7173 | ChrIV_A_nidulans_FGSC_A4:778930-781084 | WT_5hasex | WT_veg | OK | 206,061  | 684,33  | 1,73162  | -3,30123 | 0,000962605 | 0,00760756  | yes |
| AN7177 | ChrIV_A_nidulans_FGSC_A4:767808-768838 | WT_5hasex | WT_veg | OK | 214,785  | 674,301 | 1,6505   | -3,36    | 0,000779417 | 0,00634898  | yes |
| AN7183 | ChrIV_A_nidulans_FGSC_A4:753001-754115 | WT_5hasex | WT_veg | OK | 153,662  | 617,043 | 2,00561  | -3,841   | 0,000122535 | 0,00131176  | yes |
| AN7184 | ChrIV_A_nidulans_FGSC_A4:750820-752111 | WT_5hasex | WT_veg | OK | 15,7052  | 46,8295 | 1,57618  | -2,75763 | 0,00582227  | 0,0336791   | yes |
| AN7188 | ChrIV_A_nidulans_FGSC_A4:739468-742330 | WT_5hasex | WT_veg | OK | 18,8048  | 49,7408 | 1,40333  | -2,70939 | 0,00674067  | 0,0380056   | yes |
| AN7200 | ChrIV_A_nidulans_FGSC_A4:700878-702590 | WT_5hasex | WT_veg | OK | 0,606272 | 21,4411 | 5,14427  | -5,86902 | 4,38376E-09 | 1,36493E-07 | yes |
| AN7205 | ChrIV_A_nidulans_FGSC_A4:688812-690441 | WT_5hasex | WT_veg | OK | 32,4184  | 150,305 | 2,21301  | -4,37338 | 1,22339E-05 | 0,000171872 | yes |
| AN7211 | ChrIV_A_nidulans_FGSC_A4:668299-669490 | WT_5hasex | WT_veg | OK | 66,5686  | 26,4903 | -1,32938 | 2,6237   | 0,00869791  | 0,0466556   | yes |
| AN7222 | ChrIV_A_nidulans_FGSC_A4:630008-636437 | WT_5hasex | WT_veg | OK | 24,2642  | 96,0689 | 1,98524  | -3,14223 | 0,00167668  | 0,0120523   | yes |
| AN7225 | ChrIV_A_nidulans_FGSC_A4:619554-621409 | WT_5hasex | WT_veg | OK | 99,2809  | 22,311  | -2,15376 | 4,36286  | 1,28376E-05 | 0,000179343 | yes |
| AN7233 | ChrIV_A_nidulans_FGSC_A4:592961-593997 | WT_5hasex | WT_veg | OK | 37,865   | 8,50198 | -2,155   | 3,59152  | 0,000328749 | 0,00304151  | yes |
| AN7248 | ChrIV_A_nidulans_FGSC_A4:544884-547816 | WT_5hasex | WT_veg | OK | 8,54662  | 40,7011 | 2,25164  | -4,16961 | 0,000030512 | 0,000389214 | yes |
| AN7252 | ChrIV_A_nidulans_FGSC_A4:526908-528748 | WT_5hasex | WT_veg | OK | 16,0078  | 45,7669 | 1,51553  | -2,8204  | 0,00479634  | 0,0287784   | yes |
| AN7260 | ChrIV_A_nidulans_FGSC_A4:509275-511336 | WT_5hasex | WT_veg | OK | 9,22572  | 63,1114 | 2,77417  | -4,93857 | 7,86979E-07 | 1,48556E-05 | yes |
| AN7278 | ChrIV_A_nidulans_FGSC_A4:440157-441951 | WT_5hasex | WT_veg | OK | 100,501  | 21,9712 | -2,19352 | 4,39358  | 0,00001115  | 0,000158256 | yes |
| AN7293 | ChrIV_A_nidulans_FGSC_A4:396000-397514 | WT_5hasex | WT_veg | OK | 40,9306  | 200,611 | 2,29315  | -4,63012 | 3,65454E-06 | 5,84131E-05 | yes |
| AN7303 | ChrIV_A_nidulans_FGSC_A4:358225-361513 | WT_5hasex | WT_veg | OK | 10,6236  | 27,597  | 1,37724  | -2,67033 | 0,00757777  | 0,0417594   | yes |
| AN7304 | ChrIV_A_nidulans_FGSC_A4:355734-357255 | WT_5hasex | WT_veg | OK | 35,2218  | 92,4268 | 1,39184  | -2,82425 | 0,0047392   | 0,0285026   | yes |
| AN7305 | ChrIV_A_nidulans_FGSC_A4:354052-355372 | WT_5hasex | WT_veg | OK | 30,7089  | 82,5274 | 1,42622  | -2,77969 | 0,00544111  | 0,0318291   | yes |
| AN7332 | ChrIV_A_nidulans_FGSC_A4:284406-286847 | WT_5hasex | WT_veg | OK | 15,4699  | 4,53317 | -1,77088 | 3,21261  | 0,00131536  | 0,00984398  | yes |
| AN7334 | ChrIV_A_nidulans_FGSC_A4:274454-278164 | WT_5hasex | WT_veg | OK | 45,2523  | 154,42  | 1,7708   | -3,66782 | 0,000244623 | 0,00237033  | yes |
| AN7336 | ChrIV_A_nidulans_FGSC_A4:267852-268314 | WT_5hasex | WT_veg | OK | 103,56   | 327,608 | 1,66151  | -3,07106 | 0,00213298  | 0,0147379   | yes |
| AN7341 | ChrIV_A_nidulans_FGSC_A4:255159-257102 | WT_5hasex | WT_veg | OK | 239,718  | 791,941 | 1,72406  | -3,33867 | 0,000841814 | 0,00678657  | yes |
| AN7348 | ChrIV_A_nidulans_FGSC_A4:221562-231126 | WT_5hasex | WT_veg | OK | 10,2274  | 30,6672 | 1,58425  | -3,33135 | 0,000864245 | 0,00694817  | yes |
| AN7350 | ChrIV_A_nidulans_FGSC_A4:215002-217031 | WT_5hasex | WT_veg | OK | 33,693   | 98,3544 | 1,54554  | -3,13285 | 0,00173116  | 0,0123827   | yes |
| AN7357 | ChrIV_A_nidulans_FGSC_A4:198051-198999 | WT_5hasex | WT_veg | OK | 29,2723  | 705,244 | 4,59052  | -8,58821 | 0           | 0           | yes |
| AN7358 | ChrIV_A_nidulans_FGSC_A4:194393-196442 | WT_5hasex | WT_veg | OK | 10,5343  | 33,3656 | 1,66327  | -2,98185 | 0,00286515  | 0,018791    | yes |
| AN7360 | ChrIV_A_nidulans_FGSC_A4:189108-190693 | WT_5hasex | WT_veg | OK | 26,4608  | 80,0642 | 1,5973   | -3,08592 | 0,00202926  | 0,0141462   | yes |
| AN7364 | ChrIV_A_nidulans_FGSC_A4:173418-174759 | WT_5hasex | WT_veg | OK | 13,4534  | 53,0052 | 1,97816  | -3,47268 | 0,000515284 | 0,0044662   | yes |
| AN7365 | ChrIV_A_nidulans_FGSC_A4:172365-173290 | WT_5hasex | WT_veg | OK | 40,2432  | 169,217 | 2,07206  | -3,97965 | 6,90167E-05 | 0,000794337 | yes |
| AN7374 | ChrIV_A_nidulans_FGSC_A4:145048-145858 | WT_5hasex | WT_veg | OK | 77,6492  | 226,318 | 1,54331  | -3,153   | 0,001616    | 0,0116947   | yes |
| AN7378 | ChrIV_A_nidulans_FGSC_A4:137120-137829 | WT_5hasex | WT_veg | OK | 34,5352  | 7,90144 | -2,12788 | 3,06127  | 0,00220401  | 0,0151576   | yes |

## Supplementary table 2

|        |                                          |           |        |    |         |          |          |          |             |             |     |
|--------|------------------------------------------|-----------|--------|----|---------|----------|----------|----------|-------------|-------------|-----|
| AN7390 | ChrIV_A_nidulans_FGSC_A4:102557-104331   | WT_5hasex | WT_veg | OK | 24,9995 | 78,85    | 1,65721  | -3,28188 | 0,00103117  | 0,00806256  | yes |
| AN7397 | ChrIV_A_nidulans_FGSC_A4:79909-82639     | WT_5hasex | WT_veg | OK | 4,59195 | 0,873969 | -2,39345 | 2,80998  | 0,00495449  | 0,0295129   | yes |
| AN7424 | ChrIV_A_nidulans_FGSC_A4:1507093-1508811 | WT_5hasex | WT_veg | OK | 59,7676 | 201,24   | 1,75148  | -3,56872 | 0,000358726 | 0,00327605  | yes |
| AN7429 | ChrIV_A_nidulans_FGSC_A4:1518962-1520343 | WT_5hasex | WT_veg | OK | 21,6955 | 92,17    | 2,0869   | -3,89568 | 9,79254E-05 | 0,00107623  | yes |
| AN7442 | ChrIV_A_nidulans_FGSC_A4:1552633-1553813 | WT_5hasex | WT_veg | OK | 16,0199 | 48,8029  | 1,6071   | -2,82039 | 0,00479651  | 0,0287784   | yes |
| AN7451 | ChrIV_A_nidulans_FGSC_A4:1581046-1584683 | WT_5hasex | WT_veg | OK | 72,2029 | 233,04   | 1,69045  | -3,41609 | 0,000635282 | 0,00533666  | yes |
| AN7458 | ChrIV_A_nidulans_FGSC_A4:1606047-1607967 | WT_5hasex | WT_veg | OK | 18,4263 | 125,937  | 2,77286  | -5,22963 | 1,6985E-07  | 3,74126E-06 | yes |
| AN7460 | ChrIV_A_nidulans_FGSC_A4:1610653-1611335 | WT_5hasex | WT_veg | OK | 81,4727 | 347,985  | 2,09464  | -3,89107 | 9,98033E-05 | 0,00109412  | yes |
| AN7461 | ChrIV_A_nidulans_FGSC_A4:1611488-1612772 | WT_5hasex | WT_veg | OK | 37,7043 | 97,2491  | 1,36695  | -2,72904 | 0,00635182  | 0,0362146   | yes |
| AN7467 | ChrIV_A_nidulans_FGSC_A4:1631978-1632909 | WT_5hasex | WT_veg | OK | 8,85603 | 35,8136  | 2,01577  | -2,72279 | 0,00647326  | 0,0367749   | yes |
| AN7470 | ChrIV_A_nidulans_FGSC_A4:1638053-1642224 | WT_5hasex | WT_veg | OK | 265,657 | 1107,8   | 2,06007  | -3,83054 | 0,000127863 | 0,00136047  | yes |
| AN7474 | ChrIV_A_nidulans_FGSC_A4:1648485-1652147 | WT_5hasex | WT_veg | OK | 29,1643 | 76,3819  | 1,38903  | -2,92354 | 0,00346078  | 0,0220542   | yes |
| AN7481 | ChrIV_A_nidulans_FGSC_A4:1674994-1676702 | WT_5hasex | WT_veg | OK | 9,7357  | 28,4269  | 1,5459   | -2,65061 | 0,00803457  | 0,0437613   | yes |
| AN7501 | ChrIV_A_nidulans_FGSC_A4:1739702-1741048 | WT_5hasex | WT_veg | OK | 169     | 837,973  | 2,30988  | -4,74933 | 2,04093E-06 | 3,49964E-05 | yes |
| AN7503 | ChrIV_A_nidulans_FGSC_A4:1743613-1746122 | WT_5hasex | WT_veg | OK | 19,0734 | 62,7301  | 1,7176   | -3,48569 | 0,000490876 | 0,00428215  | yes |
| AN7517 | ChrIV_A_nidulans_FGSC_A4:1806781-1808535 | WT_5hasex | WT_veg | OK | 130,227 | 419,962  | 1,68923  | -3,2667  | 0,00108809  | 0,0084222   | yes |
| AN7521 | ChrIV_A_nidulans_FGSC_A4:1816345-1818028 | WT_5hasex | WT_veg | OK | 77,5662 | 0,482759 | -7,32798 | 5,28667  | 1,24563E-07 | 2,82813E-06 | yes |
| AN7524 | ChrIV_A_nidulans_FGSC_A4:1831427-1834453 | WT_5hasex | WT_veg | OK | 40,4451 | 135,554  | 1,74483  | -3,37941 | 0,00072641  | 0,00598042  | yes |
| AN7526 | ChrIV_A_nidulans_FGSC_A4:1835962-1837965 | WT_5hasex | WT_veg | OK | 14,0285 | 137,068  | 3,28846  | -6,08115 | 1,19322E-09 | 4,15188E-08 | yes |
| AN7530 | ChrIV_A_nidulans_FGSC_A4:1850389-1851228 | WT_5hasex | WT_veg | OK | 27,9492 | 130,725  | 2,22566  | -4,08307 | 4,44442E-05 | 0,000540865 | yes |
| AN7537 | ChrIV_A_nidulans_FGSC_A4:1872994-1874893 | WT_5hasex | WT_veg | OK | 26,7744 | 69,0128  | 1,36601  | -2,69427 | 0,00705439  | 0,0393595   | yes |
| AN7541 | ChrIV_A_nidulans_FGSC_A4:1887063-1888121 | WT_5hasex | WT_veg | OK | 9,68698 | 36,7772  | 1,92469  | -2,75781 | 0,00581906  | 0,0336679   | yes |
| AN7549 | ChrIV_A_nidulans_FGSC_A4:1918973-1920926 | WT_5hasex | WT_veg | OK | 25,0979 | 141,886  | 2,49909  | -5,08774 | 3,62363E-07 | 7,4174E-06  | yes |
| AN7554 | ChrIV_A_nidulans_FGSC_A4:1941982-1944191 | WT_5hasex | WT_veg | OK | 20,7347 | 140,947  | 2,76504  | -5,49296 | 3,9526E-08  | 0,000001004 | yes |
| AN7555 | ChrIV_A_nidulans_FGSC_A4:1944649-1945499 | WT_5hasex | WT_veg | OK | 22,4248 | 64,1473  | 1,51629  | -2,66951 | 0,00759627  | 0,041835    | yes |
| AN7558 | ChrIV_A_nidulans_FGSC_A4:1952643-1953319 | WT_5hasex | WT_veg | OK | 340,54  | 1696,21  | 2,31642  | -3,84945 | 0,000118385 | 0,00127253  | yes |
| AN7569 | ChrIV_A_nidulans_FGSC_A4:1976323-1977439 | WT_5hasex | WT_veg | OK | 28,6875 | 116,154  | 2,01755  | -3,7815  | 0,000155886 | 0,00160605  | yes |
| AN7571 | ChrIV_A_nidulans_FGSC_A4:1981434-1984325 | WT_5hasex | WT_veg | OK | 18,6587 | 54,9871  | 1,55925  | -3,1525  | 0,00161877  | 0,0117083   | yes |
| AN7577 | ChrIV_A_nidulans_FGSC_A4:2010828-2012779 | WT_5hasex | WT_veg | OK | 6,70454 | 40,3413  | 2,58905  | -4,19251 | 2,75882E-05 | 0,00035564  | yes |
| AN7583 | ChrIV_A_nidulans_FGSC_A4:2035213-2038064 | WT_5hasex | WT_veg | OK | 41,2942 | 128,779  | 1,64089  | -3,10236 | 0,00191987  | 0,0134841   | yes |
| AN7588 | ChrIV_A_nidulans_FGSC_A4:2053111-2054364 | WT_5hasex | WT_veg | OK | 188,272 | 1002,79  | 2,41313  | -4,84619 | 1,25855E-06 | 2,25703E-05 | yes |
| AN7590 | ChrIV_A_nidulans_FGSC_A4:2065740-2066541 | WT_5hasex | WT_veg | OK | 617,895 | 1955,13  | 1,66183  | -2,88795 | 0,00387765  | 0,0241765   | yes |
| AN7604 | ChrIV_A_nidulans_FGSC_A4:2110638-2114128 | WT_5hasex | WT_veg | OK | 48,4362 | 216,923  | 2,16302  | -4,24904 | 2,14686E-05 | 0,000283804 | yes |
| AN7605 | ChrIV_A_nidulans_FGSC_A4:2114455-2115760 | WT_5hasex | WT_veg | OK | 10,7242 | 33,8857  | 1,65981  | -2,69765 | 0,00698305  | 0,0390487   | yes |
| AN7607 | ChrIV_A_nidulans_FGSC_A4:2125944-2127342 | WT_5hasex | WT_veg | OK | 18,4652 | 54,3077  | 1,55635  | -2,882   | 0,00395161  | 0,0245463   | yes |
| AN7608 | ChrIV_A_nidulans_FGSC_A4:2129343-2130499 | WT_5hasex | WT_veg | OK | 14,2448 | 46,2459  | 1,69889  | -2,83705 | 0,00455328  | 0,0275967   | yes |
| AN7609 | ChrIV_A_nidulans_FGSC_A4:2131036-2135266 | WT_5hasex | WT_veg | OK | 16,777  | 87,3531  | 2,38037  | -4,96143 | 6,99766E-07 | 1,33683E-05 | yes |
| AN7617 | ChrIV_A_nidulans_FGSC_A4:2154068-2154806 | WT_5hasex | WT_veg | OK | 101,917 | 374,562  | 1,87782  | -3,81768 | 0,000134713 | 0,00142324  | yes |
| AN7630 | ChrIV_A_nidulans_FGSC_A4:2193853-2195531 | WT_5hasex | WT_veg | OK | 26,7155 | 116,91   | 2,12965  | -4,27568 | 1,90555E-05 | 0,000255451 | yes |
| AN7661 | ChrIV_A_nidulans_FGSC_A4:2302033-2305283 | WT_5hasex | WT_veg | OK | 62,9047 | 179,59   | 1,51347  | -3,11214 | 0,00185739  | 0,0131246   | yes |
| AN7671 | ChrIV_A_nidulans_FGSC_A4:2332975-2334255 | WT_5hasex | WT_veg | OK | 13,9299 | 44,156   | 1,66442  | -2,63212 | 0,00848542  | 0,0457086   | yes |
| AN7672 | ChrIV_A_nidulans_FGSC_A4:2334526-2336250 | WT_5hasex | WT_veg | OK | 28,8741 | 121,777  | 2,07639  | -4,12284 | 3,74234E-05 | 0,000465368 | yes |
| AN7674 | ChrIV_A_nidulans_FGSC_A4:2338343-2339321 | WT_5hasex | WT_veg | OK | 20,6089 | 163,788  | 2,9905   | -4,87742 | 1,07483E-06 | 1,95635E-05 | yes |
| AN7689 | ChrIV_A_nidulans_FGSC_A4:2385977-2387405 | WT_5hasex | WT_veg | OK | 13,0847 | 42,2047  | 1,68952  | -2,98202 | 0,00286353  | 0,018785    | yes |
| AN7699 | ChrIV_A_nidulans_FGSC_A4:2416122-2417685 | WT_5hasex | WT_veg | OK | 50,3968 | 160,41   | 1,67036  | -3,41962 | 0,000627088 | 0,00528052  | yes |
| AN7708 | ChrIV_A_nidulans_FGSC_A4:2445025-2447630 | WT_5hasex | WT_veg | OK | 478,528 | 2228,36  | 2,21931  | -4,14842 | 3,34784E-05 | 0,000421918 | yes |

## Supplementary table 2

|        |                                          |           |        |    |         |          |          |          |             |             |     |
|--------|------------------------------------------|-----------|--------|----|---------|----------|----------|----------|-------------|-------------|-----|
| AN7712 | ChrIV_A_nidulans_FGSC_A4:2453105-2454091 | WT_5hasex | WT_veg | OK | 251,244 | 1078,99  | 2,10252  | -4,15565 | 3,24364E-05 | 0,000411306 | yes |
| AN7724 | ChrIV_A_nidulans_FGSC_A4:2483342-2483979 | WT_5hasex | WT_veg | OK | 128,059 | 753,81   | 2,5574   | -5,30636 | 1,11835E-07 | 0,000002576 | yes |
| AN7727 | ChrIV_A_nidulans_FGSC_A4:2491875-2493909 | WT_5hasex | WT_veg | OK | 41,8415 | 180,15   | 2,10619  | -4,14021 | 3,46988E-05 | 0,000435517 | yes |
| AN7729 | ChrIV_A_nidulans_FGSC_A4:2506580-2511471 | WT_5hasex | WT_veg | OK | 38,8854 | 107,787  | 1,47088  | -3,01968 | 0,00253045  | 0,016987    | yes |
| AN7749 | ChrIV_A_nidulans_FGSC_A4:2582519-2584911 | WT_5hasex | WT_veg | OK | 60,7577 | 177,419  | 1,54602  | -3,20952 | 0,00132955  | 0,00993597  | yes |
| AN7755 | ChrIV_A_nidulans_FGSC_A4:2603482-2604481 | WT_5hasex | WT_veg | OK | 30,0258 | 131,713  | 2,13313  | -4,08491 | 4,40944E-05 | 0,000537107 | yes |
| AN7756 | ChrIV_A_nidulans_FGSC_A4:2604714-2606036 | WT_5hasex | WT_veg | OK | 1,45792 | 11,0304  | 2,91949  | -3,58209 | 0,00034085  | 0,00313851  | yes |
| AN7762 | ChrIV_A_nidulans_FGSC_A4:2625539-2626916 | WT_5hasex | WT_veg | OK | 18,4404 | 75,7132  | 2,03767  | -3,61644 | 0,000298678 | 0,00281094  | yes |
| AN7771 | ChrIV_A_nidulans_FGSC_A4:2650412-2651026 | WT_5hasex | WT_veg | OK | 219,629 | 619,753  | 1,49662  | -3,01826 | 0,00254227  | 0,0170555   | yes |
| AN7774 | ChrIV_A_nidulans_FGSC_A4:2658568-2659880 | WT_5hasex | WT_veg | OK | 37,0996 | 7,71963  | -2,2648  | 3,49539  | 0,000473362 | 0,00415496  | yes |
| AN7776 | ChrIV_A_nidulans_FGSC_A4:2664014-2665644 | WT_5hasex | WT_veg | OK | 9,71622 | 33,2341  | 1,7742   | -2,86509 | 0,00416889  | 0,0256587   | yes |
| AN7779 | ChrIV_A_nidulans_FGSC_A4:2670465-2672265 | WT_5hasex | WT_veg | OK | 50,1336 | 127,292  | 1,34429  | -2,68598 | 0,00723174  | 0,0401821   | yes |
| AN7794 | ChrIV_A_nidulans_FGSC_A4:2712885-2714263 | WT_5hasex | WT_veg | OK | 44,8171 | 146,935  | 1,71306  | -3,11326 | 0,00185031  | 0,0130845   | yes |
| AN7796 | ChrIV_A_nidulans_FGSC_A4:2718415-2719515 | WT_5hasex | WT_veg | OK | 49,4984 | 13,1882  | -1,90814 | 3,18831  | 0,00143106  | 0,0105576   | yes |
| AN7799 | ChrIV_A_nidulans_FGSC_A4:2723929-2724697 | WT_5hasex | WT_veg | OK | 39,5137 | 196,305  | 2,31268  | -4,40625 | 1,05177E-05 | 0,000150382 | yes |
| AN7826 | ChrIV_A_nidulans_FGSC_A4:2791289-2792610 | WT_5hasex | WT_veg | OK | 12,8632 | 86,484   | 2,74918  | -4,60931 | 4,04004E-06 | 6,38439E-05 | yes |
| AN7832 | ChrIV_A_nidulans_FGSC_A4:2807782-2809787 | WT_5hasex | WT_veg | OK | 8,62625 | 2,43635  | -1,82401 | 2,67487  | 0,00747576  | 0,0412928   | yes |
| AN7866 | ChrII_A_nidulans_FGSC_A4:57941-59689     | WT_5hasex | WT_veg | OK | 6,42442 | 0,906768 | -2,82476 | 2,80321  | 0,00505959  | 0,0300298   | yes |
| AN7870 | ChrII_A_nidulans_FGSC_A4:69377-70915     | WT_5hasex | WT_veg | OK | 8,53984 | 1,15274  | -2,88914 | 2,96893  | 0,00298842  | 0,0194896   | yes |
| AN7874 | ChrII_A_nidulans_FGSC_A4:89354-90365     | WT_5hasex | WT_veg | OK | 2,40057 | 13,2392  | 2,46336  | -3,10558 | 0,00189903  | 0,0133628   | yes |
| AN7877 | ChrII_A_nidulans_FGSC_A4:93314-94619     | WT_5hasex | WT_veg | OK | 34,2373 | 96,5443  | 1,49562  | -2,97482 | 0,00293156  | 0,0191781   | yes |
| AN7889 | ChrII_A_nidulans_FGSC_A4:151697-154524   | WT_5hasex | WT_veg | OK | 44,5569 | 135,068  | 1,59996  | -3,22974 | 0,00123904  | 0,00936374  | yes |
| AN7891 | ChrII_A_nidulans_FGSC_A4:156779-158388   | WT_5hasex | WT_veg | OK | 13,9495 | 0,732813 | -4,25062 | 3,1502   | 0,00163158  | 0,0117847   | yes |
| AN7898 | ChrII_A_nidulans_FGSC_A4:175939-177310   | WT_5hasex | WT_veg | OK | 6,75941 | 0,312821 | -4,43349 | 2,83193  | 0,00462676  | 0,0279451   | yes |
| AN7913 | ChrII_A_nidulans_FGSC_A4:219024-220864   | WT_5hasex | WT_veg | OK | 15,4699 | 45,7799  | 1,56525  | -2,85402 | 0,00431695  | 0,0264241   | yes |
| AN7919 | ChrII_A_nidulans_FGSC_A4:232289-234920   | WT_5hasex | WT_veg | OK | 1,01504 | 4,67194  | 2,20249  | -2,68845 | 0,00717842  | 0,0399397   | yes |
| AN7939 | ChrII_A_nidulans_FGSC_A4:277013-278511   | WT_5hasex | WT_veg | OK | 0,59358 | 5,55102  | 3,22524  | -2,94788 | 0,00319965  | 0,0206259   | yes |
| AN7944 | ChrII_A_nidulans_FGSC_A4:291772-292867   | WT_5hasex | WT_veg | OK | 62,1706 | 544,499  | 3,13062  | -6,10922 | 1,0012E-09  | 3,54238E-08 | yes |
| AN7953 | ChrII_A_nidulans_FGSC_A4:316179-317243   | WT_5hasex | WT_veg | OK | 4,41247 | 37,9779  | 3,1055   | -4,05747 | 4,96068E-05 | 0,000594034 | yes |
| AN7954 | ChrII_A_nidulans_FGSC_A4:317490-318640   | WT_5hasex | WT_veg | OK | 0,78813 | 21,1459  | 4,7458   | -4,66167 | 3,13652E-06 | 5,12184E-05 | yes |
| AN7959 | ChrII_A_nidulans_FGSC_A4:329446-330265   | WT_5hasex | WT_veg | OK | 7,0503  | 82,6055  | 3,55048  | -4,53389 | 5,79071E-06 | 8,83134E-05 | yes |
| AN7960 | ChrII_A_nidulans_FGSC_A4:330642-331047   | WT_5hasex | WT_veg | OK | 18,5286 | 358,776  | 4,27526  | -5,66015 | 1,51244E-08 | 4,20673E-07 | yes |
| AN7968 | ChrII_A_nidulans_FGSC_A4:347107-347787   | WT_5hasex | WT_veg | OK | 1,44097 | 11,7949  | 3,03305  | -2,8935  | 0,00380972  | 0,0238561   | yes |
| AN7971 | ChrII_A_nidulans_FGSC_A4:357624-359930   | WT_5hasex | WT_veg | OK | 16,0937 | 51,6935  | 1,68348  | -3,26914 | 0,00107875  | 0,00836469  | yes |
| AN7989 | ChrII_A_nidulans_FGSC_A4:421741-423187   | WT_5hasex | WT_veg | OK | 37,6574 | 244,897  | 2,70117  | -5,5071  | 3,64788E-08 | 9,35207E-07 | yes |
| AN7992 | ChrII_A_nidulans_FGSC_A4:427960-428615   | WT_5hasex | WT_veg | OK | 1336,67 | 6630,47  | 2,31047  | -3,74241 | 0,000182263 | 0,00184168  | yes |
| AN7994 | ChrII_A_nidulans_FGSC_A4:432458-434720   | WT_5hasex | WT_veg | OK | 13,2465 | 37,491   | 1,50093  | -2,85262 | 0,00433598  | 0,0265237   | yes |
| AN8000 | ChrII_A_nidulans_FGSC_A4:453970-466058   | WT_5hasex | WT_veg | OK | 8,72299 | 21,0257  | 1,26926  | -2,61779 | 0,00885004  | 0,0473321   | yes |
| AN8010 | ChrII_A_nidulans_FGSC_A4:489880-492602   | WT_5hasex | WT_veg | OK | 202,082 | 704,35   | 1,80135  | -3,16362 | 0,00155822  | 0,0113442   | yes |
| AN8018 | ChrII_A_nidulans_FGSC_A4:514411-515988   | WT_5hasex | WT_veg | OK | 48,0143 | 147,202  | 1,61627  | -3,20616 | 0,00134517  | 0,0100385   | yes |
| AN8031 | ChrII_A_nidulans_FGSC_A4:547886-550448   | WT_5hasex | WT_veg | OK | 20,9215 | 70,8587  | 1,75996  | -3,61903 | 0,000295707 | 0,00278748  | yes |
| AN8032 | ChrII_A_nidulans_FGSC_A4:551775-552842   | WT_5hasex | WT_veg | OK | 227,526 | 718,61   | 1,65918  | -3,37637 | 0,000734487 | 0,00603269  | yes |
| AN8037 | ChrII_A_nidulans_FGSC_A4:567037-568460   | WT_5hasex | WT_veg | OK | 41,9059 | 11,0049  | -1,92901 | 3,03864  | 0,00237645  | 0,0161226   | yes |
| AN8038 | ChrII_A_nidulans_FGSC_A4:572419-574348   | WT_5hasex | WT_veg | OK | 49,2454 | 127,925  | 1,37724  | -2,88209 | 0,00395042  | 0,0245447   | yes |
| AN8050 | ChrII_A_nidulans_FGSC_A4:602648-603277   | WT_5hasex | WT_veg | OK | 193,784 | 834,24   | 2,10601  | -4,36928 | 1,24658E-05 | 0,000174661 | yes |
| AN8058 | ChrII_A_nidulans_FGSC_A4:625152-626499   | WT_5hasex | WT_veg | OK | 9,21662 | 60,9372  | 2,72501  | -4,45851 | 8,25328E-06 | 0,000121315 | yes |

## Supplementary table 2

|        |                                          |           |        |    |          |         |          |          |             |             |     |
|--------|------------------------------------------|-----------|--------|----|----------|---------|----------|----------|-------------|-------------|-----|
| AN8060 | ChrII_A_nidulans_FGSC_A4:628576-629651   | WT_5hasex | WT_veg | OK | 26,1148  | 8,28031 | -1,65711 | 2,76559  | 0,00568196  | 0,0330168   | yes |
| AN8062 | ChrII_A_nidulans_FGSC_A4:634160-635329   | WT_5hasex | WT_veg | OK | 10,0101  | 94,6123 | 3,24057  | -5,28636 | 1,24775E-07 | 2,83172E-06 | yes |
| AN8066 | ChrII_A_nidulans_FGSC_A4:640466-642564   | WT_5hasex | WT_veg | OK | 9,83837  | 39,8727 | 2,01891  | -3,40179 | 0,000669468 | 0,0055752   | yes |
| AN8067 | ChrII_A_nidulans_FGSC_A4:642976-645790   | WT_5hasex | WT_veg | OK | 29,8104  | 108,084 | 1,85826  | -3,76328 | 0,000167701 | 0,00171304  | yes |
| AN8068 | ChrII_A_nidulans_FGSC_A4:646561-648587   | WT_5hasex | WT_veg | OK | 91,532   | 34,7298 | -1,3981  | 2,7071   | 0,00678743  | 0,0382199   | yes |
| AN8073 | ChrII_A_nidulans_FGSC_A4:662220-664686   | WT_5hasex | WT_veg | OK | 22,7793  | 127,253 | 2,48191  | -4,95539 | 7,21871E-07 | 1,37405E-05 | yes |
| AN8075 | ChrII_A_nidulans_FGSC_A4:669864-671759   | WT_5hasex | WT_veg | OK | 15,1657  | 54,2434 | 1,83864  | -3,34864 | 0,000812106 | 0,00657946  | yes |
| AN8095 | ChrII_A_nidulans_FGSC_A4:733216-735110   | WT_5hasex | WT_veg | OK | 11,5669  | 85,5225 | 2,8863   | -4,95233 | 7,33293E-07 | 1,39326E-05 | yes |
| AN8098 | ChrII_A_nidulans_FGSC_A4:748579-749523   | WT_5hasex | WT_veg | OK | 17,0197  | 108,203 | 2,66846  | -4,30482 | 1,67118E-05 | 0,000228532 | yes |
| AN8099 | ChrII_A_nidulans_FGSC_A4:752073-753835   | WT_5hasex | WT_veg | OK | 41,8618  | 6,03208 | -2,7949  | 4,30127  | 1,69819E-05 | 0,000231621 | yes |
| AN8102 | ChrII_A_nidulans_FGSC_A4:760631-762135   | WT_5hasex | WT_veg | OK | 99,3713  | 416,523 | 2,0675   | -3,94346 | 8,03134E-05 | 0,000904877 | yes |
| AN8117 | ChrII_A_nidulans_FGSC_A4:805621-807249   | WT_5hasex | WT_veg | OK | 70,4708  | 219,967 | 1,64219  | -3,43484 | 0,000592902 | 0,00503635  | yes |
| AN8122 | ChrII_A_nidulans_FGSC_A4:820216-821961   | WT_5hasex | WT_veg | OK | 107,526  | 749,618 | 2,80147  | -4,79258 | 1,64647E-06 | 0,000028846 | yes |
| AN8124 | ChrII_A_nidulans_FGSC_A4:824404-826249   | WT_5hasex | WT_veg | OK | 72,9303  | 1332,9  | 4,1919   | -6,73584 | 1,62983E-11 | 7,50495E-10 | yes |
| AN8142 | ChrII_A_nidulans_FGSC_A4:889426-890518   | WT_5hasex | WT_veg | OK | 1,52572  | 11,6615 | 2,93419  | -3,48039 | 0,000500685 | 0,00435829  | yes |
| AN8148 | ChrII_A_nidulans_FGSC_A4:903351-904600   | WT_5hasex | WT_veg | OK | 5,23281  | 24,9944 | 2,25595  | -2,91413 | 0,00356677  | 0,0225923   | yes |
| AN8150 | ChrII_A_nidulans_FGSC_A4:909758-917049   | WT_5hasex | WT_veg | OK | 5,71762  | 23,663  | 2,04914  | -3,47239 | 0,000515839 | 0,00446941  | yes |
| AN8155 | ChrII_A_nidulans_FGSC_A4:937766-938854   | WT_5hasex | WT_veg | OK | 11,4572  | 42,2154 | 1,88152  | -2,76569 | 0,0056802   | 0,0330103   | yes |
| AN8159 | ChrII_A_nidulans_FGSC_A4:963205-963962   | WT_5hasex | WT_veg | OK | 0,321225 | 10,4837 | 5,02842  | -3,27181 | 0,00106862  | 0,00829103  | yes |
| AN8163 | ChrII_A_nidulans_FGSC_A4:975507-979040   | WT_5hasex | WT_veg | OK | 4,10226  | 16,3669 | 1,99629  | -2,69927 | 0,00694922  | 0,0388928   | yes |
| AN8164 | ChrII_A_nidulans_FGSC_A4:975507-979040   | WT_5hasex | WT_veg | OK | 2,10407  | 7,7278  | 1,87687  | -2,62663 | 0,00862357  | 0,0463384   | yes |
| AN8169 | ChrII_A_nidulans_FGSC_A4:996556-998638   | WT_5hasex | WT_veg | OK | 80,5861  | 328,273 | 2,02629  | -3,7908  | 0,000150164 | 0,00155604  | yes |
| AN8172 | ChrII_A_nidulans_FGSC_A4:1005511-1007389 | WT_5hasex | WT_veg | OK | 61,3904  | 174,292 | 1,50542  | -2,94671 | 0,00321179  | 0,0206914   | yes |
| AN8175 | ChrII_A_nidulans_FGSC_A4:1014676-1016416 | WT_5hasex | WT_veg | OK | 27,2096  | 76,9702 | 1,50019  | -3,01373 | 0,00258061  | 0,0172597   | yes |
| AN8180 | ChrII_A_nidulans_FGSC_A4:1036785-1038668 | WT_5hasex | WT_veg | OK | 31,7095  | 98,4837 | 1,63497  | -3,34998 | 0,000808173 | 0,00654963  | yes |
| AN8183 | ChrII_A_nidulans_FGSC_A4:1048882-1051839 | WT_5hasex | WT_veg | OK | 10,6666  | 54,6125 | 2,35613  | -4,38604 | 1,15434E-05 | 0,000163045 | yes |
| AN8188 | ChrII_A_nidulans_FGSC_A4:1064985-1066257 | WT_5hasex | WT_veg | OK | 83,8268  | 246,963 | 1,55881  | -3,1237  | 0,00178595  | 0,0127088   | yes |
| AN8191 | ChrII_A_nidulans_FGSC_A4:1076553-1077602 | WT_5hasex | WT_veg | OK | 41,4057  | 111,874 | 1,43397  | -2,85144 | 0,00435219  | 0,0266088   | yes |
| AN8195 | ChrII_A_nidulans_FGSC_A4:1098265-1098715 | WT_5hasex | WT_veg | OK | 4,6843   | 71,9667 | 3,94142  | -4,68641 | 2,7804E-06  | 4,59182E-05 | yes |
| AN8200 | ChrII_A_nidulans_FGSC_A4:1114497-1115325 | WT_5hasex | WT_veg | OK | 132,358  | 583,504 | 2,1403   | -4,41427 | 0,000010135 | 0,000145785 | yes |
| AN8202 | ChrII_A_nidulans_FGSC_A4:1118593-1120496 | WT_5hasex | WT_veg | OK | 164,262  | 447,564 | 1,44609  | -2,84022 | 0,0045082   | 0,0273868   | yes |
| AN8207 | ChrII_A_nidulans_FGSC_A4:1133990-1134726 | WT_5hasex | WT_veg | OK | 10,5598  | 59,5577 | 2,4957   | -3,81194 | 0,000137878 | 0,00144878  | yes |
| AN8224 | ChrII_A_nidulans_FGSC_A4:1196220-1198507 | WT_5hasex | WT_veg | OK | 77,3139  | 194,08  | 1,32785  | -2,72633 | 0,00640423  | 0,0364579   | yes |
| AN8229 | ChrII_A_nidulans_FGSC_A4:1206875-1208458 | WT_5hasex | WT_veg | OK | 117,823  | 333,855 | 1,50259  | -2,9755  | 0,00292511  | 0,019141    | yes |
| AN8231 | ChrII_A_nidulans_FGSC_A4:1215638-1218013 | WT_5hasex | WT_veg | OK | 117,23   | 288,765 | 1,30055  | -2,5978  | 0,0093824   | 0,0495322   | yes |
| AN8239 | ChrII_A_nidulans_FGSC_A4:1243683-1244686 | WT_5hasex | WT_veg | OK | 34,3354  | 142,806 | 2,05628  | -3,97654 | 6,99239E-05 | 0,000803014 | yes |
| AN8247 | ChrII_A_nidulans_FGSC_A4:1265878-1266730 | WT_5hasex | WT_veg | OK | 17,2955  | 128,528 | 2,89361  | -4,71892 | 2,37096E-06 | 3,98725E-05 | yes |
| AN8248 | ChrII_A_nidulans_FGSC_A4:1267861-1269483 | WT_5hasex | WT_veg | OK | 12,958   | 37,2058 | 1,52168  | -2,6988  | 0,00695895  | 0,0389347   | yes |
| AN8253 | ChrII_A_nidulans_FGSC_A4:1288680-1290262 | WT_5hasex | WT_veg | OK | 18,7106  | 117,662 | 2,65272  | -4,89833 | 9,66526E-07 | 1,77651E-05 | yes |
| AN8264 | ChrII_A_nidulans_FGSC_A4:1318874-1320468 | WT_5hasex | WT_veg | OK | 20,5812  | 95,2041 | 2,2097   | -4,23843 | 2,25092E-05 | 0,00029614  | yes |
| AN8268 | ChrII_A_nidulans_FGSC_A4:1331426-1333127 | WT_5hasex | WT_veg | OK | 8,73158  | 31,9793 | 1,87282  | -3,16521 | 0,00154973  | 0,0112932   | yes |
| AN8272 | ChrII_A_nidulans_FGSC_A4:1345230-1347449 | WT_5hasex | WT_veg | OK | 24,9011  | 102,361 | 2,03939  | -4,0948  | 4,22525E-05 | 0,000517801 | yes |
| AN8274 | ChrII_A_nidulans_FGSC_A4:1350374-1352055 | WT_5hasex | WT_veg | OK | 564,186  | 2245,68 | 1,99291  | -3,54671 | 0,000390076 | 0,00351639  | yes |
| AN8278 | ChrII_A_nidulans_FGSC_A4:1362286-1363338 | WT_5hasex | WT_veg | OK | 270,877  | 1328,54 | 2,29414  | -4,52628 | 6,00321E-06 | 9,11826E-05 | yes |
| AN8279 | ChrII_A_nidulans_FGSC_A4:1364312-1366442 | WT_5hasex | WT_veg | OK | 53,3907  | 337,943 | 2,66212  | -5,28945 | 1,22686E-07 | 0,000002794 | yes |
| AN8284 | ChrII_A_nidulans_FGSC_A4:1381987-1382935 | WT_5hasex | WT_veg | OK | 85,0849  | 267,515 | 1,65264  | -3,39383 | 0,000689217 | 0,00571914  | yes |

## Supplementary table 2

|        |                                           |           |        |    |         |          |          |          |             |             |     |
|--------|-------------------------------------------|-----------|--------|----|---------|----------|----------|----------|-------------|-------------|-----|
| AN8293 | ChrII_A_nidulans_FGSC_A4:1409117-1412511  | WT_5hasex | WT_veg | OK | 40,1821 | 99,918   | 1,31419  | -2,72577 | 0,00641511  | 0,0365079   | yes |
| AN8308 | ChrV_A_nidulans_FGSC_A4:69779-70236       | WT_5hasex | WT_veg | OK | 285,408 | 12,347   | -4,5308  | 7,1036   | 1,21547E-12 | 6,76148E-11 | yes |
| AN8314 | ChrV_A_nidulans_FGSC_A4:97877-102864      | WT_5hasex | WT_veg | OK | 30,0218 | 2,21908  | -3,75798 | 7,10887  | 1,16995E-12 | 6,52906E-11 | yes |
| AN8337 | ChrV_A_nidulans_FGSC_A4:166227-167283     | WT_5hasex | WT_veg | OK | 83,3527 | 5,44774  | -3,9355  | 6,04035  | 1,53777E-09 | 5,20558E-08 | yes |
| AN8339 | ChrV_A_nidulans_FGSC_A4:169721-171028     | WT_5hasex | WT_veg | OK | 497,699 | 2892,51  | 2,53897  | -4,49821 | 6,85266E-06 | 0,000102715 | yes |
| AN8345 | ChrV_A_nidulans_FGSC_A4:186010-188539     | WT_5hasex | WT_veg | OK | 1,28799 | 5,80236  | 2,17152  | -2,85392 | 0,00431829  | 0,0264292   | yes |
| AN8365 | ChrV_A_nidulans_FGSC_A4:235927-237935     | WT_5hasex | WT_veg | OK | 28,6118 | 4,36926  | -2,71115 | 4,65215  | 3,28494E-06 | 0,000053382 | yes |
| AN8366 | ChrV_A_nidulans_FGSC_A4:243479-244811     | WT_5hasex | WT_veg | OK | 96,1474 | 18,0923  | -2,40987 | 4,83952  | 1,30153E-06 | 2,32933E-05 | yes |
| AN8368 | ChrV_A_nidulans_FGSC_A4:255598-257324     | WT_5hasex | WT_veg | OK | 14,6628 | 43,5486  | 1,57047  | -2,71523 | 0,00662292  | 0,0374667   | yes |
| AN8372 | ChrV_A_nidulans_FGSC_A4:274911-276173     | WT_5hasex | WT_veg | OK | 1,28949 | 9,59462  | 2,89542  | -2,9901  | 0,00278885  | 0,0183918   | yes |
| AN8374 | ChrV_A_nidulans_FGSC_A4:278314-281501     | WT_5hasex | WT_veg | OK | 6,08984 | 0,4462   | -3,77064 | 3,35146  | 0,00080387  | 0,00651979  | yes |
| AN8391 | ChrV_A_nidulans_FGSC_A4:338955-340897     | WT_5hasex | WT_veg | OK | 5,20717 | 29,3771  | 2,49612  | -3,80322 | 0,000142826 | 0,00149091  | yes |
| AN8399 | ChrV_A_nidulans_FGSC_A4:361087-364883     | WT_5hasex | WT_veg | OK | 15,9044 | 1,79388  | -3,14827 | 5,57445  | 2,48309E-08 | 6,60166E-07 | yes |
| AN8402 | ChrV_A_nidulans_FGSC_A4:373515-374142     | WT_5hasex | WT_veg | OK | 18,0403 | 71,7653  | 1,99206  | -3,10849 | 0,00188048  | 0,0132519   | yes |
| AN8403 | ChrV_A_nidulans_FGSC_A4:374555-375556     | WT_5hasex | WT_veg | OK | 2,84947 | 17,8591  | 2,6479   | -3,37684 | 0,000733238 | 0,00602716  | yes |
| AN8454 | ChrV_A_nidulans_FGSC_A4:538053-540419     | WT_5hasex | WT_veg | OK | 25,5067 | 88,2333  | 1,79045  | -2,99917 | 0,00270719  | 0,0179345   | yes |
| AN8455 | ChrV_A_nidulans_FGSC_A4:541023-543575     | WT_5hasex | WT_veg | OK | 14,7352 | 40,1506  | 1,44615  | -2,73202 | 0,00629469  | 0,0359318   | yes |
| AN8457 | ChrV_A_nidulans_FGSC_A4:547968-551571     | WT_5hasex | WT_veg | OK | 5,53535 | 21,2011  | 1,93739  | -3,10028 | 0,0019334   | 0,0135701   | yes |
| AN8459 | ChrV_A_nidulans_FGSC_A4:555756-557548     | WT_5hasex | WT_veg | OK | 20,258  | 0,560254 | -5,17626 | 3,702    | 0,000213908 | 0,00211096  | yes |
| AN8461 | ChrV_A_nidulans_FGSC_A4:560956-562287     | WT_5hasex | WT_veg | OK | 554,285 | 1815,62  | 1,71176  | -3,02271 | 0,00250523  | 0,0168306   | yes |
| AN8479 | ChrV_A_nidulans_FGSC_A4:612860-615622     | WT_5hasex | WT_veg | OK | 2,80181 | 10,6707  | 1,92922  | -2,99703 | 0,00272625  | 0,018038    | yes |
| AN8491 | ChrV_A_nidulans_FGSC_A4:671075-671949     | WT_5hasex | WT_veg | OK | 41,2094 | 167,052  | 2,01926  | -3,71103 | 0,000206419 | 0,00204786  | yes |
| AN8495 | ChrV_A_nidulans_FGSC_A4:681211-684024     | WT_5hasex | WT_veg | OK | 40,1077 | 207,438  | 2,37073  | -4,75027 | 2,0314E-06  | 3,48672E-05 | yes |
| AN8500 | ChrV_A_nidulans_FGSC_A4:693299-694142     | WT_5hasex | WT_veg | OK | 106,069 | 386,804  | 1,86661  | -3,87489 | 0,000106673 | 0,00116118  | yes |
| AN8503 | ChrV_A_nidulans_FGSC_A4:701815-702416     | WT_5hasex | WT_veg | OK | 21,0834 | 115,389  | 2,45232  | -3,65558 | 0,000256601 | 0,00247222  | yes |
| AN8525 | ChrV_A_nidulans_FGSC_A4:757321-758883     | WT_5hasex | WT_veg | OK | 23,3439 | 5,70236  | -2,03342 | 3,3371   | 0,00084659  | 0,00681983  | yes |
| AN8528 | ChrV_A_nidulans_FGSC_A4:766958-768369     | WT_5hasex | WT_veg | OK | 28,9986 | 98,5713  | 1,76519  | -3,30174 | 0,000960868 | 0,00759906  | yes |
| AN8531 | ChrV_A_nidulans_FGSC_A4:772832-773799     | WT_5hasex | WT_veg | OK | 21,3643 | 66,4259  | 1,63655  | -2,83735 | 0,004549    | 0,0275803   | yes |
| AN8533 | ChrV_A_nidulans_FGSC_A4:776508-777630     | WT_5hasex | WT_veg | OK | 8,84391 | 41,3446  | 2,22494  | -3,11782 | 0,00182195  | 0,0129036   | yes |
| AN8536 | ChrV_A_nidulans_FGSC_A4:788894-790551     | WT_5hasex | WT_veg | OK | 27,128  | 92,8591  | 1,77526  | -3,20486 | 0,00135126  | 0,0100767   | yes |
| AN8537 | ChrV_A_nidulans_FGSC_A4:791416-793502     | WT_5hasex | WT_veg | OK | 80,0299 | 29,5247  | -1,43862 | 2,94506  | 0,0032289   | 0,0207863   | yes |
| AN8544 | ChrV_A_nidulans_FGSC_A4:816827-818612     | WT_5hasex | WT_veg | OK | 109,375 | 20,2664  | -2,43211 | 4,90171  | 9,50038E-07 | 0,000017511 | yes |
| AN8545 | ChrV_A_nidulans_FGSC_A4:819218-822684     | WT_5hasex | WT_veg | OK | 3,09879 | 15,5222  | 2,32456  | -3,63974 | 0,000272908 | 0,0026013   | yes |
| AN8546 | ChrV_A_nidulans_FGSC_A4:823384-827231     | WT_5hasex | WT_veg | OK | 19,1862 | 60,8003  | 1,66401  | -3,14908 | 0,00163788  | 0,0118253   | yes |
| AN8567 | ChrV_A_nidulans_FGSC_A4:892535-894024     | WT_5hasex | WT_veg | OK | 151,655 | 413,519  | 1,44716  | -2,96197 | 0,00305681  | 0,0198541   | yes |
| AN8587 | ChrIII_A_nidulans_FGSC_A4:3439386-3440589 | WT_5hasex | WT_veg | OK | 16,072  | 3,69914  | -2,11929 | 2,88249  | 0,00394543  | 0,0245195   | yes |
| AN8591 | ChrIII_A_nidulans_FGSC_A4:3426182-3430148 | WT_5hasex | WT_veg | OK | 162,979 | 610,577  | 1,90549  | -3,82933 | 0,00012849  | 0,00136658  | yes |
| AN8611 | ChrIII_A_nidulans_FGSC_A4:3373594-3374681 | WT_5hasex | WT_veg | OK | 46,2964 | 147,875  | 1,67541  | -2,6848  | 0,00725721  | 0,0403023   | yes |
| AN8621 | ChrIII_A_nidulans_FGSC_A4:3342363-3345010 | WT_5hasex | WT_veg | OK | 5,2032  | 122,55   | 4,44657  | -7,0458  | 1,84408E-12 | 9,90097E-11 | yes |
| AN8627 | ChrIII_A_nidulans_FGSC_A4:3327538-3328904 | WT_5hasex | WT_veg | OK | 99,9668 | 277,567  | 1,47331  | -2,85507 | 0,00430269  | 0,0263461   | yes |
| AN8636 | ChrIII_A_nidulans_FGSC_A4:3302048-3304323 | WT_5hasex | WT_veg | OK | 95,2335 | 602,095  | 2,66045  | -4,76796 | 1,86097E-06 | 3,21844E-05 | yes |
| AN8639 | ChrIII_A_nidulans_FGSC_A4:3292551-3294114 | WT_5hasex | WT_veg | OK | 64,3841 | 429,456  | 2,73773  | -5,67633 | 1,37616E-08 | 3,8646E-07  | yes |
| AN8640 | ChrIII_A_nidulans_FGSC_A4:3291433-3291935 | WT_5hasex | WT_veg | OK | 80,9463 | 452,077  | 2,48153  | -4,70738 | 2,50921E-06 | 4,19284E-05 | yes |
| AN8641 | ChrIII_A_nidulans_FGSC_A4:3290648-3291265 | WT_5hasex | WT_veg | OK | 1243,68 | 6642,67  | 2,41715  | -4,28354 | 1,83943E-05 | 0,000248506 | yes |
| AN8643 | ChrIII_A_nidulans_FGSC_A4:3287480-3288765 | WT_5hasex | WT_veg | OK | 17,0577 | 51,1922  | 1,5855   | -2,89027 | 0,00384908  | 0,0240376   | yes |
| AN8648 | ChrIII_A_nidulans_FGSC_A4:3261188-3266227 | WT_5hasex | WT_veg | OK | 2,53764 | 12,1556  | 2,26006  | -3,77103 | 0,000162578 | 0,00166819  | yes |

## Supplementary table 2

|        |                                           |           |        |    |          |         |               |               |             |             |     |
|--------|-------------------------------------------|-----------|--------|----|----------|---------|---------------|---------------|-------------|-------------|-----|
| AN8660 | ChrIII_A_nidulans_FGSC_A4:3225084-3227083 | WT_5hasex | WT_veg | OK | 20,9645  | 66,2346 | 1,65964       | -3,03234      | 0,00242663  | 0,0164014   | yes |
| AN8664 | ChrIII_A_nidulans_FGSC_A4:3212148-3213335 | WT_5hasex | WT_veg | OK | 417,377  | 1113,74 | 1,41598       | -2,60267      | 0,00924998  | 0,0489663   | yes |
| AN8668 | ChrIII_A_nidulans_FGSC_A4:3189624-3190970 | WT_5hasex | WT_veg | OK | 32,1268  | 132,939 | 2,04891       | -3,99631      | 6,43371E-05 | 0,000747537 | yes |
| AN8679 | ChrIII_A_nidulans_FGSC_A4:3138377-3139618 | WT_5hasex | WT_veg | OK | 67,6549  | 237,77  | 1,8133        | -3,63462      | 0,00027839  | 0,00264662  | yes |
| AN8682 | ChrIII_A_nidulans_FGSC_A4:3132554-3133796 | WT_5hasex | WT_veg | OK | 14,9127  | 46,2105 | 1,63167       | -2,86779      | 0,00413354  | 0,02548     | yes |
| AN8690 | ChrIII_A_nidulans_FGSC_A4:3116168-3117028 | WT_5hasex | WT_veg | OK | 171,15   | 423,152 | 1,30591       | -2,7049       | 0,00683259  | 0,0383917   | yes |
| AN8691 | ChrIII_A_nidulans_FGSC_A4:3113089-3116051 | WT_5hasex | WT_veg | OK | 6,67442  | 20,3485 | 1,60821       | -2,85113      | 0,00435646  | 0,0266224   | yes |
| AN8713 | ChrIII_A_nidulans_FGSC_A4:3047459-3050758 | WT_5hasex | WT_veg | OK | 30,1226  | 102,29  | 1,76374       | -3,66696      | 0,00024545  | 0,00237658  | yes |
| AN8714 | ChrIII_A_nidulans_FGSC_A4:3046834-3047230 | WT_5hasex | WT_veg | OK | 390,399  | 2486,64 | 2,67117       | -5,52424      | 3,30915E-08 | 8,55481E-07 | yes |
| AN8718 | ChrIII_A_nidulans_FGSC_A4:3028358-3031194 | WT_5hasex | WT_veg | OK | 76,4191  | 253,591 | 1,7305        | -3,50113      | 0,000463296 | 0,00408165  | yes |
| AN8720 | ChrIII_A_nidulans_FGSC_A4:3026055-3027077 | WT_5hasex | WT_veg | OK | 129,72   | 442,366 | 1,76984       | -3,50569      | 0,000455425 | 0,00402245  | yes |
| AN8733 | ChrIII_A_nidulans_FGSC_A4:2993414-2994535 | WT_5hasex | WT_veg | OK | 1,43304  | 35,0303 | 4,61146       | -5,69059      | 1,26599E-08 | 3,58402E-07 | yes |
| AN8741 | ChrIII_A_nidulans_FGSC_A4:2957664-2958685 | WT_5hasex | WT_veg | OK | 10,7283  | 45,1803 | 2,07428       | -3,34485      | 0,000823278 | 0,00665454  | yes |
| AN8743 | ChrIII_A_nidulans_FGSC_A4:2948047-2951759 | WT_5hasex | WT_veg | OK | 22,052   | 55,4404 | 1,33002       | -2,66514      | 0,00769574  | 0,0422584   | yes |
| AN8750 | ChrIII_A_nidulans_FGSC_A4:2930469-2931066 | WT_5hasex | WT_veg | OK | 341,09   | 858,842 | 1,33224       | -2,67877      | 0,00738922  | 0,0408837   | yes |
| AN8752 | ChrIII_A_nidulans_FGSC_A4:2926118-2926795 | WT_5hasex | WT_veg | OK | 30,9618  | 105,263 | 1,76543       | -2,78555      | 0,00534371  | 0,0313539   | yes |
| AN8770 | ChrIII_A_nidulans_FGSC_A4:2873118-2876168 | WT_5hasex | WT_veg | OK | 73,0461  | 222,958 | 1,60989       | -3,24335      | 0,00118135  | 0,00901352  | yes |
| AN8772 | ChrIII_A_nidulans_FGSC_A4:2858385-2859557 | WT_5hasex | WT_veg | OK | 23,7502  | 100,915 | 2,08713       | -3,73347      | 0,000188862 | 0,00189732  | yes |
| AN8774 | ChrIII_A_nidulans_FGSC_A4:2849632-2851295 | WT_5hasex | WT_veg | OK | 9,16079  | 56,6332 | 2,6281        | -4,30934      | 0,000016374 | 0,000224498 | yes |
| AN8779 | ChrIII_A_nidulans_FGSC_A4:2828679-2833021 | WT_5hasex | WT_veg | OK | 0,189746 | 6,34872 | 5,06433       | -6,06525      | 1,31747E-09 | 4,53006E-08 | yes |
| AN8781 | ChrIII_A_nidulans_FGSC_A4:2822837-2823771 | WT_5hasex | WT_veg | OK | 917,638  | 5322,37 | 2,53607       | -3,31169      | 0,000927341 | 0,00737867  | yes |
| AN8785 | ChrIII_A_nidulans_FGSC_A4:2809000-2811384 | WT_5hasex | WT_veg | OK | 42,3268  | 148,501 | 1,81083       | -3,78303      | 0,000154931 | 0,00159848  | yes |
| AN8786 | ChrIII_A_nidulans_FGSC_A4:2806644-2808430 | WT_5hasex | WT_veg | OK | 10,8064  | 34,7098 | 1,68345       | -2,81795      | 0,00483312  | 0,0289446   | yes |
| AN8787 | ChrIII_A_nidulans_FGSC_A4:2802223-2805732 | WT_5hasex | WT_veg | OK | 23,9819  | 61,0945 | 1,3491        | -2,8106       | 0,00494492  | 0,0294693   | yes |
| AN8794 | ChrIII_A_nidulans_FGSC_A4:2785064-2785975 | WT_5hasex | WT_veg | OK | 50,3434  | 149,244 | 1,5678        | -3,05493      | 0,0022511   | 0,0154179   | yes |
| AN8799 | ChrIII_A_nidulans_FGSC_A4:2770452-2772054 | WT_5hasex | WT_veg | OK | 8,08099  | 38,895  | 2,26698       | -3,70739      | 0,00020941  | 0,00207334  | yes |
| AN8802 | ChrIII_A_nidulans_FGSC_A4:2763522-2764796 | WT_5hasex | WT_veg | OK | 7,38481  | 0       | -1.79769e+308 | -1.79769e+308 | 0,0057383   | 0,0332962   | yes |
| AN8804 | ChrIII_A_nidulans_FGSC_A4:2758048-2758894 | WT_5hasex | WT_veg | OK | 33,2663  | 105,938 | 1,67109       | -3,15288      | 0,00161668  | 0,0116972   | yes |
| AN8805 | ChrIII_A_nidulans_FGSC_A4:2756174-2756919 | WT_5hasex | WT_veg | OK | 38,0047  | 181,686 | 2,2572        | -4,1256       | 3,69775E-05 | 0,000460596 | yes |
| AN8812 | ChrIII_A_nidulans_FGSC_A4:2734962-2740767 | WT_5hasex | WT_veg | OK | 5,70783  | 18,8554 | 1,72396       | -3,10213      | 0,00192134  | 0,0134926   | yes |
| AN8819 | ChrIII_A_nidulans_FGSC_A4:2707980-2709094 | WT_5hasex | WT_veg | OK | 22,725   | 95,1987 | 2,06666       | -3,71463      | 0,000203502 | 0,00202429  | yes |
| AN8825 | ChrIII_A_nidulans_FGSC_A4:2682030-2685197 | WT_5hasex | WT_veg | OK | 3,61888  | 19,5907 | 2,43655       | -4,02291      | 5,74847E-05 | 0,000676164 | yes |
| AN8834 | ChrIII_A_nidulans_FGSC_A4:2651751-2653059 | WT_5hasex | WT_veg | OK | 12,3841  | 138,127 | 3,47943       | -5,88598      | 3,95701E-09 | 1,24388E-07 | yes |
| AN8840 | ChrIII_A_nidulans_FGSC_A4:2624867-2626250 | WT_5hasex | WT_veg | OK | 0,785442 | 9,96736 | 3,66564       | -2,95083      | 0,00316922  | 0,0204574   | yes |
| AN8844 | ChrIII_A_nidulans_FGSC_A4:2613194-2613734 | WT_5hasex | WT_veg | OK | 246,586  | 630,67  | 1,35479       | -2,80248      | 0,00507113  | 0,0300812   | yes |
| AN8855 | ChrIII_A_nidulans_FGSC_A4:2586846-2587742 | WT_5hasex | WT_veg | OK | 16,5666  | 101,004 | 2,60806       | -4,45073      | 8,55804E-06 | 0,000125233 | yes |
| AN8860 | ChrIII_A_nidulans_FGSC_A4:2573594-2575297 | WT_5hasex | WT_veg | OK | 51,0716  | 138,395 | 1,43819       | -2,67082      | 0,00756653  | 0,0417238   | yes |
| AN8863 | ChrIII_A_nidulans_FGSC_A4:2565633-2567644 | WT_5hasex | WT_veg | OK | 409,038  | 1824,48 | 2,15718       | -3,7911       | 0,00014998  | 0,00155444  | yes |
| AN8871 | ChrVII_A_nidulans_FGSC_A4:605090-607137   | WT_5hasex | WT_veg | OK | 11,0449  | 54,8126 | 2,31113       | -4,23374      | 2,29832E-05 | 0,000301469 | yes |
| AN8874 | ChrVII_A_nidulans_FGSC_A4:593499-596360   | WT_5hasex | WT_veg | OK | 76,8234  | 192,96  | 1,32868       | -2,69389      | 0,00706241  | 0,039379    | yes |
| AN8876 | ChrVII_A_nidulans_FGSC_A4:589180-591623   | WT_5hasex | WT_veg | OK | 17,2357  | 82,4331 | 2,25783       | -4,49234      | 7,04463E-06 | 0,000105442 | yes |
| AN8888 | ChrVII_A_nidulans_FGSC_A4:548177-548707   | WT_5hasex | WT_veg | OK | 29,0445  | 118,137 | 2,02412       | -3,46294      | 0,000534316 | 0,00460362  | yes |
| AN8890 | ChrVII_A_nidulans_FGSC_A4:542215-543510   | WT_5hasex | WT_veg | OK | 16,9477  | 1,49167 | -3,50609      | 3,69242       | 0,000222133 | 0,00218068  | yes |
| AN8892 | ChrVII_A_nidulans_FGSC_A4:533261-537973   | WT_5hasex | WT_veg | OK | 11,7261  | 31,3125 | 1,41701       | -2,82039      | 0,00479658  | 0,0287784   | yes |
| AN8894 | ChrVII_A_nidulans_FGSC_A4:528278-530658   | WT_5hasex | WT_veg | OK | 17,2759  | 6,28894 | -1,45787      | 2,73924       | 0,00615819  | 0,0352742   | yes |
| AN8896 | ChrVII_A_nidulans_FGSC_A4:522449-523594   | WT_5hasex | WT_veg | OK | 19,1534  | 5,0844  | -1,91345      | 2,89514       | 0,00378993  | 0,0237588   | yes |



## Supplementary table 2

|        |                                         |           |        |    |          |          |               |               |             |             |     |
|--------|-----------------------------------------|-----------|--------|----|----------|----------|---------------|---------------|-------------|-------------|-----|
| AN8910 | ChrVII_A_nidulans_FGSC_A4:481319-489055 | WT_5hasex | WT_veg | OK | 5,96852  | 19,983   | 1,74333       | -3,55629      | 0,000376124 | 0,00340833  | yes |
| AN8914 | ChrVII_A_nidulans_FGSC_A4:467392-469493 | WT_5hasex | WT_veg | OK | 1,12362  | 6,80787  | 2,59905       | -3,03222      | 0,00242762  | 0,016406    | yes |
| AN8930 | ChrVII_A_nidulans_FGSC_A4:395154-397650 | WT_5hasex | WT_veg | OK | 10,2957  | 77,5241  | 2,9126        | -5,34654      | 8,96523E-08 | 2,11239E-06 | yes |
| AN8939 | ChrVII_A_nidulans_FGSC_A4:376169-377375 | WT_5hasex | WT_veg | OK | 3,45146  | 19,6835  | 2,5117        | -3,50843      | 0,000450752 | 0,00398655  | yes |
| AN8955 | ChrVII_A_nidulans_FGSC_A4:306361-308105 | WT_5hasex | WT_veg | OK | 1,40672  | 8,72712  | 2,63317       | -2,76198      | 0,00574526  | 0,0333256   | yes |
| AN8956 | ChrVII_A_nidulans_FGSC_A4:303030-304902 | WT_5hasex | WT_veg | OK | 0,407641 | 4,20245  | 3,36586       | -3,80418      | 0,000142274 | 0,00148663  | yes |
| AN8959 | ChrVII_A_nidulans_FGSC_A4:292526-293164 | WT_5hasex | WT_veg | OK | 176,38   | 589,261  | 1,74022       | -3,57733      | 0,000347125 | 0,00318587  | yes |
| AN8962 | ChrVII_A_nidulans_FGSC_A4:283390-284080 | WT_5hasex | WT_veg | OK | 2,89286  | 26,6153  | 3,20169       | -4,06004      | 4,90636E-05 | 0,000588606 | yes |
| AN8968 | ChrVII_A_nidulans_FGSC_A4:264168-265260 | WT_5hasex | WT_veg | OK | 17,8574  | 53,2905  | 1,57736       | -2,6398       | 0,00829539  | 0,0448601   | yes |
| AN8972 | ChrVII_A_nidulans_FGSC_A4:252140-254065 | WT_5hasex | WT_veg | OK | 3,50516  | 37,1568  | 3,40608       | -5,07766      | 3,82109E-07 | 7,77906E-06 | yes |
| AN8974 | ChrVII_A_nidulans_FGSC_A4:245681-246975 | WT_5hasex | WT_veg | OK | 49,2473  | 161,854  | 1,71658       | -3,06301      | 0,00219123  | 0,0150847   | yes |
| AN8975 | ChrVII_A_nidulans_FGSC_A4:243327-244279 | WT_5hasex | WT_veg | OK | 10,6485  | 80,4474  | 2,9174        | -4,68029      | 2,86467E-06 | 4,71613E-05 | yes |
| AN8983 | ChrVII_A_nidulans_FGSC_A4:222602-224668 | WT_5hasex | WT_veg | OK | 122,092  | 947,679  | 2,95643       | -4,37329      | 0,000012239 | 0,000171898 | yes |
| AN8986 | ChrVII_A_nidulans_FGSC_A4:215467-216779 | WT_5hasex | WT_veg | OK | 7,87682  | 0,653575 | -3,59119      | 2,62303       | 0,00871525  | 0,0467304   | yes |
| AN8988 | ChrVII_A_nidulans_FGSC_A4:209201-210298 | WT_5hasex | WT_veg | OK | 15,161   | 51,8847  | 1,77494       | -2,99627      | 0,00273308  | 0,0180764   | yes |
| AN9004 | ChrVII_A_nidulans_FGSC_A4:161719-163663 | WT_5hasex | WT_veg | OK | 44,6736  | 6,62868  | -2,75263      | 4,45706       | 8,3091E-06  | 0,000121896 | yes |
| AN9005 | ChrVII_A_nidulans_FGSC_A4:152385-160547 | WT_5hasex | WT_veg | OK | 0,496982 | 4,36502  | 3,13472       | -4,13723      | 3,51517E-05 | 0,000440464 | yes |
| AN9006 | ChrVII_A_nidulans_FGSC_A4:151065-151647 | WT_5hasex | WT_veg | OK | 0,467779 | 20,7339  | 5,47002       | -2,84102      | 0,00449702  | 0,0273379   | yes |
| AN9021 | ChrVII_A_nidulans_FGSC_A4:112516-115618 | WT_5hasex | WT_veg | OK | 9,26494  | 25,7212  | 1,47311       | -2,78691      | 0,00532137  | 0,0312682   | yes |
| AN9022 | ChrVII_A_nidulans_FGSC_A4:110676-111329 | WT_5hasex | WT_veg | OK | 12,3514  | 69,6583  | 2,49561       | -3,80424      | 0,000142241 | 0,00148658  | yes |
| AN9023 | ChrVII_A_nidulans_FGSC_A4:108394-110297 | WT_5hasex | WT_veg | OK | 6,86175  | 70,7538  | 3,36616       | -5,36185      | 8,23726E-08 | 1,95848E-06 | yes |
| AN9024 | ChrVII_A_nidulans_FGSC_A4:107205-108194 | WT_5hasex | WT_veg | OK | 6,71743  | 34,9355  | 2,37871       | -3,5077       | 0,000452002 | 0,00399491  | yes |
| AN9028 | ChrVII_A_nidulans_FGSC_A4:92995-94126   | WT_5hasex | WT_veg | OK | 0,59392  | 4,54519  | 2,936         | -2,97209      | 0,00295783  | 0,019319    | yes |
| AN9037 | ChrVII_A_nidulans_FGSC_A4:67512-70705   | WT_5hasex | WT_veg | OK | 3,04161  | 16,4328  | 2,43367       | -3,91161      | 9,16847E-05 | 0,00101746  | yes |
| AN9038 | ChrVII_A_nidulans_FGSC_A4:65983-67407   | WT_5hasex | WT_veg | OK | 2,08378  | 9,07533  | 2,12275       | -2,83726      | 0,0045502   | 0,0275844   | yes |
| AN9049 | ChrVII_A_nidulans_FGSC_A4:37547-38783   | WT_5hasex | WT_veg | OK | 17,6354  | 48,4959  | 1,45939       | -2,60312      | 0,00923793  | 0,0489218   | yes |
| AN9069 | ChrVI_A_nidulans_FGSC_A4:533027-534941  | WT_5hasex | WT_veg | OK | 65,7908  | 189,334  | 1,52497       | -2,82326      | 0,00475384  | 0,0285808   | yes |
| AN9071 | ChrVI_A_nidulans_FGSC_A4:523236-525641  | WT_5hasex | WT_veg | OK | 70,1887  | 168,758  | 1,26565       | -2,60894      | 0,0090823   | 0,0482786   | yes |
| AN9074 | ChrVI_A_nidulans_FGSC_A4:518618-519361  | WT_5hasex | WT_veg | OK | 33,2747  | 257,925  | 2,95445       | -5,34908      | 8,84038E-08 | 2,08485E-06 | yes |
| AN9077 | ChrVI_A_nidulans_FGSC_A4:502353-507602  | WT_5hasex | WT_veg | OK | 12,1445  | 37,1593  | 1,61342       | -3,31997      | 0,000900286 | 0,00719597  | yes |
| AN9100 | ChrVI_A_nidulans_FGSC_A4:430796-432438  | WT_5hasex | WT_veg | OK | 64,8003  | 347,477  | 2,42284       | -5,06325      | 4,12172E-07 | 8,32318E-06 | yes |
| AN9102 | ChrVI_A_nidulans_FGSC_A4:427003-428251  | WT_5hasex | WT_veg | OK | 13,086   | 74,2132  | 2,50365       | -4,15412      | 3,26543E-05 | 0,000413521 | yes |
| AN9105 | ChrVI_A_nidulans_FGSC_A4:417169-419452  | WT_5hasex | WT_veg | OK | 27,9838  | 90,1014  | 1,68696       | -3,37949      | 0,000726216 | 0,00597976  | yes |
| AN9106 | ChrVI_A_nidulans_FGSC_A4:415179-417004  | WT_5hasex | WT_veg | OK | 11,2656  | 60,1215  | 2,41596       | -4,06874      | 4,72691E-05 | 0,000569817 | yes |
| AN9108 | ChrVI_A_nidulans_FGSC_A4:410625-412337  | WT_5hasex | WT_veg | OK | 67,2837  | 10,4364  | -2,68863      | 4,423         | 9,73387E-06 | 0,000140633 | yes |
| AN9123 | ChrVI_A_nidulans_FGSC_A4:372394-372874  | WT_5hasex | WT_veg | OK | 84,4895  | 274,982  | 1,70249       | -3,15758      | 0,00159086  | 0,0115388   | yes |
| AN9124 | ChrVI_A_nidulans_FGSC_A4:369756-371860  | WT_5hasex | WT_veg | OK | 166,601  | 611,598  | 1,87619       | -3,67283      | 0,000239875 | 0,00232906  | yes |
| AN9125 | ChrVI_A_nidulans_FGSC_A4:368266-369600  | WT_5hasex | WT_veg | OK | 15,708   | 96,9779  | 2,62616       | -4,63412      | 3,58452E-06 | 5,75124E-05 | yes |
| AN9128 | ChrVI_A_nidulans_FGSC_A4:362119-363272  | WT_5hasex | WT_veg | OK | 7,17569  | 0        | -1.79769e+308 | -1.79769e+308 | 0,00943039  | 0,0497404   | yes |
| AN9129 | ChrVI_A_nidulans_FGSC_A4:357610-360977  | WT_5hasex | WT_veg | OK | 3,79577  | 0        | -1.79769e+308 | -1.79769e+308 | 0,00501028  | 0,0297861   | yes |
| AN9142 | ChrVI_A_nidulans_FGSC_A4:319468-320455  | WT_5hasex | WT_veg | OK | 38,3772  | 147,319  | 1,94062       | -3,18814      | 0,00143193  | 0,0105607   | yes |
| AN9162 | ChrVI_A_nidulans_FGSC_A4:238205-239816  | WT_5hasex | WT_veg | OK | 3,65572  | 14,8446  | 2,02172       | -2,78428      | 0,0053646   | 0,0314423   | yes |
| AN9163 | ChrVI_A_nidulans_FGSC_A4:236244-237223  | WT_5hasex | WT_veg | OK | 287,543  | 1333,04  | 2,21287       | -4,21836      | 2,46087E-05 | 0,000320463 | yes |
| AN9167 | ChrVI_A_nidulans_FGSC_A4:226010-227087  | WT_5hasex | WT_veg | OK | 10,1302  | 66,8099  | 2,7214        | -4,43396      | 9,25182E-06 | 0,000134335 | yes |
| AN9179 | ChrVI_A_nidulans_FGSC_A4:181029-182130  | WT_5hasex | WT_veg | OK | 24,5531  | 95,7197  | 1,96291       | -3,39886      | 0,000676663 | 0,00562744  | yes |
| AN9180 | ChrVI_A_nidulans_FGSC_A4:178807-180745  | WT_5hasex | WT_veg | OK | 129      | 818,859  | 2,66625       | -4,77272      | 1,81755E-06 | 3,15062E-05 | yes |

## Supplementary table 2

|        |                                            |           |        |    |          |          |               |               |             |             |     |
|--------|--------------------------------------------|-----------|--------|----|----------|----------|---------------|---------------|-------------|-------------|-----|
| AN9185 | ChrVI_A_nidulans_FGSC_A4:166688-167294     | WT_5hasex | WT_veg | OK | 7,22644  | 32,142   | 2,15311       | -2,83277      | 0,00461469  | 0,0278914   | yes |
| AN9186 | ChrVI_A_nidulans_FGSC_A4:164092-166004     | WT_5hasex | WT_veg | OK | 68,7214  | 379,829  | 2,46652       | -3,9747       | 7,04674E-05 | 0,000808547 | yes |
| AN9191 | ChrVI_A_nidulans_FGSC_A4:154949-156549     | WT_5hasex | WT_veg | OK | 34,3917  | 127,287  | 1,88795       | -3,81703      | 0,000135068 | 0,00142584  | yes |
| AN9192 | ChrVI_A_nidulans_FGSC_A4:153304-154774     | WT_5hasex | WT_veg | OK | 28,5478  | 115,683  | 2,01873       | -3,91386      | 9,08318E-05 | 0,00100949  | yes |
| AN9195 | ChrVI_A_nidulans_FGSC_A4:145846-146917     | WT_5hasex | WT_veg | OK | 0,908052 | 10,363   | 3,51252       | -3,91746      | 8,94866E-05 | 0,000996659 | yes |
| AN9204 | ChrVI_A_nidulans_FGSC_A4:111671-112265     | WT_5hasex | WT_veg | OK | 12,1117  | 70,0636  | 2,53226       | -3,52923      | 0,000416767 | 0,00372178  | yes |
| AN9207 | ChrVI_A_nidulans_FGSC_A4:105697-106729     | WT_5hasex | WT_veg | OK | 7,76699  | 0        | -1.79769e+308 | -1.79769e+308 | 0,00948601  | 0,0499734   | yes |
| AN9213 | ChrVI_A_nidulans_FGSC_A4:85182-87901       | WT_5hasex | WT_veg | OK | 2,6659   | 0        | -1.79769e+308 | -1.79769e+308 | 0,00856841  | 0,046094    | yes |
| AN9240 | ChrVIII_A_nidulans_FGSC_A4:14516-15575     | WT_5hasex | WT_veg | OK | 20,7679  | 4,21626  | -2,30032      | 2,65316       | 0,00797414  | 0,0434593   | yes |
| AN9262 | ChrVIII_A_nidulans_FGSC_A4:98952-101493    | WT_5hasex | WT_veg | OK | 2,22316  | 12,7087  | 2,51513       | -3,52837      | 0,000418129 | 0,00373267  | yes |
| AN9265 | ChrVIII_A_nidulans_FGSC_A4:113099-114503   | WT_5hasex | WT_veg | OK | 9,22828  | 0,724873 | -3,67026      | 3,12207       | 0,00179582  | 0,0127582   | yes |
| AN9284 | ChrVIII_A_nidulans_FGSC_A4:173142-173957   | WT_5hasex | WT_veg | OK | 2,58711  | 23,6289  | 3,19114       | -3,91229      | 0,000091424 | 0,00101543  | yes |
| AN9285 | ChrVIII_A_nidulans_FGSC_A4:174086-174641   | WT_5hasex | WT_veg | OK | 5284,79  | 28493,6  | 2,43072       | -2,8656       | 0,00416226  | 0,0256299   | yes |
| AN9288 | ChrVIII_A_nidulans_FGSC_A4:180565-181833   | WT_5hasex | WT_veg | OK | 5,28782  | 24,1041  | 2,18853       | -2,84067      | 0,00450191  | 0,0273581   | yes |
| AN9293 | ChrVIII_A_nidulans_FGSC_A4:195165-197081   | WT_5hasex | WT_veg | OK | 6,55542  | 22,2201  | 1,76111       | -2,83962      | 0,00451671  | 0,0274321   | yes |
| AN9294 | ChrVIII_A_nidulans_FGSC_A4:197910-199597   | WT_5hasex | WT_veg | OK | 15,2625  | 53,206   | 1,8016        | -3,09328      | 0,00197959  | 0,0138645   | yes |
| AN9295 | ChrVIII_A_nidulans_FGSC_A4:202662-204420   | WT_5hasex | WT_veg | OK | 1,31339  | 8,20924  | 2,64395       | -3,01083      | 0,00260534  | 0,0173806   | yes |
| AN9297 | ChrVIII_A_nidulans_FGSC_A4:210659-212726   | WT_5hasex | WT_veg | OK | 334,428  | 100,034  | -1,74121      | 3,26024       | 0,00111318  | 0,00858343  | yes |
| AN9303 | ChrVIII_A_nidulans_FGSC_A4:229088-230217   | WT_5hasex | WT_veg | OK | 75,9281  | 381,375  | 2,3285        | -4,71669      | 2,39717E-06 | 4,02617E-05 | yes |
| AN9310 | ChrVIII_A_nidulans_FGSC_A4:243745-244298   | WT_5hasex | WT_veg | OK | 1,87446  | 19,6528  | 3,39019       | -3,30094      | 0,000963615 | 0,00761275  | yes |
| AN9342 | ChrVIII_A_nidulans_FGSC_A4:349617-354139   | WT_5hasex | WT_veg | OK | 6,15871  | 32,3456  | 2,39287       | -4,42156      | 9,79888E-06 | 0,000141533 | yes |
| AN9343 | ChrVIII_A_nidulans_FGSC_A4:355966-356815   | WT_5hasex | WT_veg | OK | 0        | 4,96031  | 1.79769e+308  | 1.79769e+308  | 0,00124263  | 0,00938545  | yes |
| AN9351 | ChrVIII_A_nidulans_FGSC_A4:388290-389058   | WT_5hasex | WT_veg | OK | 7,81725  | 53,6534  | 2,77894       | -3,18073      | 0,00146903  | 0,0107981   | yes |
| AN9357 | ChrVIII_A_nidulans_FGSC_A4:398177-399086   | WT_5hasex | WT_veg | OK | 85,352   | 255,928  | 1,58424       | -3,24416      | 0,00117796  | 0,00898902  | yes |
| AN9361 | ChrVIII_A_nidulans_FGSC_A4:405514-407375   | WT_5hasex | WT_veg | OK | 7,95382  | 46,5207  | 2,54815       | -4,18168      | 2,89368E-05 | 0,000371893 | yes |
| AN9364 | ChrVIII_A_nidulans_FGSC_A4:413228-414758   | WT_5hasex | WT_veg | OK | 0,996502 | 7,07539  | 2,82786       | -2,84246      | 0,00447671  | 0,0272397   | yes |
| AN9369 | ChrVIII_A_nidulans_FGSC_A4:425120-426884   | WT_5hasex | WT_veg | OK | 29,763   | 94,7285  | 1,67028       | -2,94927      | 0,00318528  | 0,0205485   | yes |
| AN9398 | ChrVIII_A_nidulans_FGSC_A4:514536-516290   | WT_5hasex | WT_veg | OK | 28,3922  | 224,9    | 2,98572       | -5,9278       | 3,07026E-09 | 9,80504E-08 | yes |
| AN9401 | ChrVIII_A_nidulans_FGSC_A4:521335-522703   | WT_5hasex | WT_veg | OK | 156,799  | 660,76   | 2,07521       | -4,19561      | 2,72133E-05 | 0,000351412 | yes |
| AN9404 | ChrVIII_A_nidulans_FGSC_A4:527473-528182   | WT_5hasex | WT_veg | OK | 81,2816  | 261,684  | 1,68682       | -3,37679      | 0,000733363 | 0,00602724  | yes |
| AN9409 | ChrVIII_A_nidulans_FGSC_A4:550968-552239   | WT_5hasex | WT_veg | OK | 48,2588  | 145,355  | 1,59072       | -3,18103      | 0,0014675   | 0,01079     | yes |
| AN9418 | ChrVII_A_nidulans_FGSC_A4:667536-668203    | WT_5hasex | WT_veg | OK | 22,1185  | 106,005  | 2,26081       | -3,63084      | 0,000282503 | 0,00268184  | yes |
| AN9419 | ChrVII_A_nidulans_FGSC_A4:668441-672579    | WT_5hasex | WT_veg | OK | 98,7134  | 292,777  | 1,56849       | -3,04891      | 0,00229671  | 0,0156525   | yes |
| AN9433 | ChrIII_A_nidulans_FGSC_A4:1947750-1948299  | WT_5hasex | WT_veg | OK | 21,9236  | 201,79   | 3,2023        | -5,25435      | 1,48544E-07 | 3,32651E-06 | yes |
| AN9466 | ChrVIII_A_nidulans_FGSC_A4:715103-717404   | WT_5hasex | WT_veg | OK | 50,5136  | 242,242  | 2,26171       | -4,4479       | 8,67144E-06 | 0,000126609 | yes |
| AN9471 | ChrI_A_nidulans_FGSC_A4:1658274-1659001    | WT_5hasex | WT_veg | OK | 132,67   | 365,604  | 1,46244       | -3,03066      | 0,00244022  | 0,0164741   | yes |
| AN9483 | ChrV_A_nidulans_FGSC_A4:2268673-2269610    | WT_5hasex | WT_veg | OK | 46,9182  | 194,651  | 2,05267       | -3,9524       | 7,73699E-05 | 0,000877183 | yes |
| AN9486 | ChrIII_A_nidulans_FGSC_A4:1042859-1044280  | WT_5hasex | WT_veg | OK | 37,056   | 119,176  | 1,68532       | -3,42596      | 0,000612628 | 0,00517957  | yes |
| AN9506 | ChrII_A_nidulans_FGSC_A4:843296-845313     | WT_5hasex | WT_veg | OK | 60,8075  | 172,786  | 1,50667       | -3,14568      | 0,00165701  | 0,0119322   | yes |
| AN9509 | ChrVII_A_nidulans_FGSC_A4:3893231-3894116  | WT_5hasex | WT_veg | OK | 39,0196  | 115,945  | 1,57117       | -3,05743      | 0,00223241  | 0,0153119   | yes |
| AN9523 | ChrVIII_A_nidulans_FGSC_A4:4621839-4623725 | WT_5hasex | WT_veg | OK | 46,9349  | 173,842  | 1,88904       | -3,89967      | 9,63227E-05 | 0,0010604   | yes |
| AN9531 | ChrVI_A_nidulans_FGSC_A4:3303566-3304571   | WT_5hasex | WT_veg | OK | 3,18817  | 55,7622  | 4,12849       | -5,17969      | 2,22253E-07 | 4,79083E-06 | yes |
| AN9540 | ChrVIII_A_nidulans_FGSC_A4:4462938-4464870 | WT_5hasex | WT_veg | OK | 3,40151  | 12,4777  | 1,87511       | -2,81022      | 0,0049507   | 0,0295004   | yes |
| apdA   | ChrV_A_nidulans_FGSC_A4:396315-408251      | WT_5hasex | WT_veg | OK | 10,4226  | 0,670061 | -3,95928      | 7,44698       | 9,54792E-14 | 6,06461E-12 | yes |
| arcA   | ChrVIII_A_nidulans_FGSC_A4:4306001-4307855 | WT_5hasex | WT_veg | OK | 10,3121  | 35,0766  | 1,76617       | -3,0768       | 0,00209235  | 0,0145088   | yes |
| areA   | ChrIII_A_nidulans_FGSC_A4:3191741-3194433  | WT_5hasex | WT_veg | OK | 59,6087  | 164,201  | 1,46187       | -2,64644      | 0,00813451  | 0,0441908   | yes |

## Supplementary table 2

|           |                                            |           |        |    |          |         |          |          |             |             |     |
|-----------|--------------------------------------------|-----------|--------|----|----------|---------|----------|----------|-------------|-------------|-----|
| arlA      | ChrI_A_nidulans_FGSC_A4:1832725-1833650    | WT_5hasex | WT_veg | OK | 52,3398  | 176,856 | 1,7566   | -3,40135 | 0,000670535 | 0,00558179  | yes |
| aroG      | ChrVIII_A_nidulans_FGSC_A4:3813548-3815215 | WT_5hasex | WT_veg | OK | 83,3442  | 484,534 | 2,53944  | -5,25391 | 1,48903E-07 | 3,33312E-06 | yes |
| aromA     | ChrVIII_A_nidulans_FGSC_A4:2724599-2726364 | WT_5hasex | WT_veg | OK | 19,0918  | 74,9089 | 1,97218  | -3,79692 | 0,000146507 | 0,00152417  | yes |
| atfA      | ChrVI_A_nidulans_FGSC_A4:2424360-2426194   | WT_5hasex | WT_veg | OK | 255,275  | 983,464 | 1,94582  | -3,46402 | 0,000532174 | 0,00458668  | yes |
| atrA      | ChrVII_A_nidulans_FGSC_A4:406021-410660    | WT_5hasex | WT_veg | OK | 37,9445  | 1,91388 | -4,30932 | 6,57896  | 4,73752E-11 | 2,04494E-09 | yes |
| awh11     | ChrII_A_nidulans_FGSC_A4:3270516-3271154   | WT_5hasex | WT_veg | OK | 751,367  | 12668,8 | 4,07561  | -6,58454 | 4,56282E-11 | 1,97604E-09 | yes |
| azgA      | ChrV_A_nidulans_FGSC_A4:783049-785064      | WT_5hasex | WT_veg | OK | 71,5898  | 426,892 | 2,57605  | -5,26659 | 1,38984E-07 | 3,13115E-06 | yes |
| bemA      | ChrIV_A_nidulans_FGSC_A4:1256388-1258694   | WT_5hasex | WT_veg | OK | 44,5561  | 105,615 | 1,24512  | -2,61593 | 0,0088986   | 0,0475287   | yes |
| BEST1     | ChrVII_A_nidulans_FGSC_A4:3331678-3333709  | WT_5hasex | WT_veg | OK | 100,146  | 384,984 | 1,94269  | -3,85808 | 0,00011428  | 0,00123348  | yes |
| bglD      | ChrII_A_nidulans_FGSC_A4:223094-225686     | WT_5hasex | WT_veg | OK | 20,5686  | 1,4123  | -3,86432 | 5,44037  | 5,31702E-08 | 1,31986E-06 | yes |
| bglH      | ChrII_A_nidulans_FGSC_A4:2723819-2726047   | WT_5hasex | WT_veg | OK | 1,14562  | 5,7001  | 2,31486  | -3,00431 | 0,00266182  | 0,0176922   | yes |
| bglJ      | ChrII_A_nidulans_FGSC_A4:54215-56941       | WT_5hasex | WT_veg | OK | 8,45984  | 2,03641 | -2,0546  | 3,17938  | 0,00147592  | 0,0108412   | yes |
| bimG      | ChrVIII_A_nidulans_FGSC_A4:3641437-3644201 | WT_5hasex | WT_veg | OK | 68,0884  | 209,422 | 1,62093  | -3,2922  | 0,000994059 | 0,00781204  | yes |
| bioF      | ChrI_A_nidulans_FGSC_A4:2719846-2721201    | WT_5hasex | WT_veg | OK | 61,4851  | 162,598 | 1,403    | -2,87165 | 0,00408333  | 0,0252061   | yes |
| bop1      | ChrVIII_A_nidulans_FGSC_A4:729845-732391   | WT_5hasex | WT_veg | OK | 14,9778  | 75,943  | 2,34209  | -4,54423 | 5,51377E-06 | 8,44832E-05 | yes |
| brlA      | ChrVIII_A_nidulans_FGSC_A4:1924899-1926301 | WT_5hasex | WT_veg | OK | 25,2207  | 5,59762 | -2,17172 | 3,21334  | 0,00131203  | 0,00982681  | yes |
| carC      | ChrIII_A_nidulans_FGSC_A4:2789388-2790299  | WT_5hasex | WT_veg | OK | 227,675  | 645,95  | 1,50445  | -3,13589 | 0,00171336  | 0,0122722   | yes |
| casA      | ChrV_A_nidulans_FGSC_A4:1916050-1917816    | WT_5hasex | WT_veg | OK | 94,3336  | 420,592 | 2,15658  | -4,41951 | 9,89227E-06 | 0,000142724 | yes |
| catA      | ChrIII_A_nidulans_FGSC_A4:3296323-3298751  | WT_5hasex | WT_veg | OK | 29,8535  | 268,985 | 3,17155  | -6,67107 | 2,53946E-11 | 1,13157E-09 | yes |
| catC      | ChrI_A_nidulans_FGSC_A4:1815929-1817926    | WT_5hasex | WT_veg | OK | 7,29334  | 26,9884 | 1,88769  | -3,18819 | 0,00143164  | 0,0105604   | yes |
| ccp1      | ChrVII_A_nidulans_FGSC_A4:1415977-1417413  | WT_5hasex | WT_veg | OK | 124,419  | 387,339 | 1,63839  | -3,37782 | 0,000730641 | 0,00601147  | yes |
| cdc37     | ChrVII_A_nidulans_FGSC_A4:2699868-2701488  | WT_5hasex | WT_veg | OK | 156,826  | 399,9   | 1,35048  | -2,64466 | 0,0081774   | 0,044364    | yes |
| cetJ      | ChrIII_A_nidulans_FGSC_A4:3294885-3295801  | WT_5hasex | WT_veg | OK | 96,9783  | 446,831 | 2,204    | -4,46211 | 8,11582E-06 | 0,000119496 | yes |
| cetL      | ChrVI_A_nidulans_FGSC_A4:148261-149491     | WT_5hasex | WT_veg | OK | 0,835408 | 4,99653 | 2,58038  | -2,79918 | 0,00512321  | 0,030318    | yes |
| cgrA      | ChrVII_A_nidulans_FGSC_A4:570170-570880    | WT_5hasex | WT_veg | OK | 50,9397  | 338,544 | 2,73248  | -5,1779  | 2,24401E-07 | 4,82919E-06 | yes |
| chiA      | ChrII_A_nidulans_FGSC_A4:1246858-1249793   | WT_5hasex | WT_veg | OK | 47,9263  | 17,0318 | -1,49259 | 3,02756  | 0,00246539  | 0,0166141   | yes |
| chiB      | ChrIII_A_nidulans_FGSC_A4:717479-719588    | WT_5hasex | WT_veg | OK | 39,1291  | 137,227 | 1,81025  | -3,75775 | 0,000171447 | 0,0017445   | yes |
| choC      | ChrVIII_A_nidulans_FGSC_A4:696095-697268   | WT_5hasex | WT_veg | OK | 376,914  | 952,525 | 1,33752  | -2,65635 | 0,00789926  | 0,0431319   | yes |
| chpA      | ChrVIII_A_nidulans_FGSC_A4:1403747-1404946 | WT_5hasex | WT_veg | OK | 106,089  | 533,34  | 2,32979  | -4,54545 | 5,48181E-06 | 8,40672E-05 | yes |
| chsB      | ChrVII_A_nidulans_FGSC_A4:4223814-4227305  | WT_5hasex | WT_veg | OK | 105,676  | 346,971 | 1,71517  | -3,35747 | 0,000786585 | 0,00640041  | yes |
| chsF      | ChrIII_A_nidulans_FGSC_A4:2260755-2263802  | WT_5hasex | WT_veg | OK | 15,8979  | 5,21132 | -1,60911 | 3,05374  | 0,00226008  | 0,0154693   | yes |
| cipB      | ChrII_A_nidulans_FGSC_A4:167354-168507     | WT_5hasex | WT_veg | OK | 53,2531  | 8,22692 | -2,69444 | 4,89833  | 9,66533E-07 | 1,77651E-05 | yes |
| codA      | ChrVII_A_nidulans_FGSC_A4:755021-756749    | WT_5hasex | WT_veg | OK | 48,1501  | 257,735 | 2,42028  | -5,03282 | 4,83315E-07 | 9,58255E-06 | yes |
| conJ      | ChrIII_A_nidulans_FGSC_A4:275209-275802    | WT_5hasex | WT_veg | OK | 179,383  | 24,975  | -2,84449 | 5,43688  | 5,42222E-08 | 1,34343E-06 | yes |
| cpa       | ChrVII_A_nidulans_FGSC_A4:3302661-3304455  | WT_5hasex | WT_veg | OK | 156,229  | 554,509 | 1,82755  | -3,63564 | 0,000277295 | 0,00263805  | yes |
| cpcA      | ChrII_A_nidulans_FGSC_A4:3405001-3407450   | WT_5hasex | WT_veg | OK | 372,855  | 2705,88 | 2,85941  | -4,73493 | 2,19129E-06 | 3,72093E-05 | yes |
| cpeA      | ChrIV_A_nidulans_FGSC_A4:112305-114525     | WT_5hasex | WT_veg | OK | 7,20667  | 49,1011 | 2,76835  | -4,32186 | 1,54722E-05 | 0,000213081 | yes |
| creA      | ChrI_A_nidulans_FGSC_A4:966618-968620      | WT_5hasex | WT_veg | OK | 101,153  | 310,737 | 1,61916  | -3,3329  | 0,000859444 | 0,00691275  | yes |
| creD      | ChrII_A_nidulans_FGSC_A4:1877979-1880454   | WT_5hasex | WT_veg | OK | 236,059  | 675,658 | 1,51715  | -2,83639 | 0,00456262  | 0,0276437   | yes |
| crhC      | ChrVIII_A_nidulans_FGSC_A4:2023796-2025711 | WT_5hasex | WT_veg | OK | 67,8334  | 273,839 | 2,01326  | -4,08908 | 4,33078E-05 | 0,000529002 | yes |
| cwc27     | ChrII_A_nidulans_FGSC_A4:631553-633230     | WT_5hasex | WT_veg | OK | 11,9794  | 37,895  | 1,66145  | -2,99205 | 0,00277108  | 0,0182907   | yes |
| cyp1      | ChrIII_A_nidulans_FGSC_A4:3389945-3390715  | WT_5hasex | WT_veg | OK | 1129,46  | 3847,91 | 1,76845  | -3,20178 | 0,0013658   | 0,0101548   | yes |
| cyp4      | ChrVII_A_nidulans_FGSC_A4:668441-672579    | WT_5hasex | WT_veg | OK | 59,2896  | 193,131 | 1,70373  | -3,25421 | 0,0011371   | 0,00873057  | yes |
| CYP505A8  | ChrI_A_nidulans_FGSC_A4:3333781-3337144    | WT_5hasex | WT_veg | OK | 18,5463  | 219,424 | 3,56452  | -7,33672 | 2,18936E-13 | 1,32326E-11 | yes |
| CYP5073A1 | ChrII_A_nidulans_FGSC_A4:887328-889100     | WT_5hasex | WT_veg | OK | 0,782679 | 6,62015 | 3,08037  | -3,52987 | 0,000415766 | 0,00371474  | yes |
| CYP5128A1 | ChrVII_A_nidulans_FGSC_A4:1665840-1667333  | WT_5hasex | WT_veg | OK | 38,8638  | 13,9012 | -1,48322 | 2,88649  | 0,00389564  | 0,0242671   | yes |

## Supplementary table 2

|           |                                            |           |        |    |         |         |               |               |             |             |     |
|-----------|--------------------------------------------|-----------|--------|----|---------|---------|---------------|---------------|-------------|-------------|-----|
| CYP52G1   | ChrI_nidulans_FGSC_A4:1393259-1394860      | WT_5hasex | WT_veg | OK | 31,7537 | 5,03015 | -2,65825      | 4,83343       | 0,000001342 | 2,39276E-05 | yes |
| CYP537B1  | ChrVII_A_nidulans_FGSC_A4:498809-500516    | WT_5hasex | WT_veg | OK | 47,1433 | 12,6057 | -1,90297      | 3,70115       | 0,000214627 | 0,00211606  | yes |
| CYP539A4P | ChrV_A_nidulans_FGSC_A4:2678849-2680020    | WT_5hasex | WT_veg | OK | 42,139  | 232,087 | 2,46144       | -4,28134      | 1,85775E-05 | 0,000250579 | yes |
| CYP584E1  | ChrVIII_A_nidulans_FGSC_A4:471023-472611   | WT_5hasex | WT_veg | OK | 41,419  | 16,4473 | -1,33244      | 2,62245       | 0,0087301   | 0,0468053   | yes |
| CYP620E1  | ChrVII_A_nidulans_FGSC_A4:1316521-1318592  | WT_5hasex | WT_veg | OK | 61,1261 | 165,062 | 1,43314       | -2,85709      | 0,00427549  | 0,0262194   | yes |
| CYP631B1  | ChrVI_A_nidulans_FGSC_A4:1408873-1411158   | WT_5hasex | WT_veg | OK | 48,2904 | 6,86906 | -2,81355      | 4,60053       | 4,21425E-06 | 0,000066277 | yes |
| CYP646A1  | ChrVII_A_nidulans_FGSC_A4:4471549-4473815  | WT_5hasex | WT_veg | OK | 50,5839 | 133,412 | 1,39914       | -2,90302      | 0,0036958   | 0,0232773   | yes |
| CYP659A1  | ChrVI_A_nidulans_FGSC_A4:1011275-1013229   | WT_5hasex | WT_veg | OK | 55,3239 | 157,849 | 1,51257       | -2,74899      | 0,005978    | 0,0343825   | yes |
| CYP663A1  | ChrIV_A_nidulans_FGSC_A4:73729-75415       | WT_5hasex | WT_veg | OK | 11,5738 | 35,9052 | 1,63333       | -2,81094      | 0,00493978  | 0,0294521   | yes |
| CYP671A1  | ChrV_A_nidulans_FGSC_A4:167743-169625      | WT_5hasex | WT_veg | OK | 6,65041 | 21,2162 | 1,67365       | -2,72567      | 0,00641711  | 0,0365153   | yes |
| cyp7      | ChrIII_A_nidulans_FGSC_A4:1607337-1609067  | WT_5hasex | WT_veg | OK | 179,398 | 509,657 | 1,50636       | -2,97478      | 0,002932    | 0,0191781   | yes |
| cyp8      | ChrVI_A_nidulans_FGSC_A4:449482-451116     | WT_5hasex | WT_veg | OK | 22,582  | 98,1537 | 2,11987       | -4,08197      | 4,46564E-05 | 0,000542944 | yes |
| cyp9      | ChrI_A_nidulans_FGSC_A4:3499024-3500954    | WT_5hasex | WT_veg | OK | 28,6412 | 76,466  | 1,41673       | -2,89084      | 0,00384209  | 0,0239997   | yes |
| dclA      | ChrVIII_A_nidulans_FGSC_A4:4535060-4536675 | WT_5hasex | WT_veg | OK | 1,6768  | 8,44778 | 2,33286       | -2,86286      | 0,00419833  | 0,0258096   | yes |
| ddbA      | ChrVIII_A_nidulans_FGSC_A4:3037582-3041333 | WT_5hasex | WT_veg | OK | 23,7608 | 60,5363 | 1,34922       | -2,67641      | 0,00744165  | 0,0411304   | yes |
| dfgC      | ChrVIII_A_nidulans_FGSC_A4:3694451-3696404 | WT_5hasex | WT_veg | OK | 23,5592 | 61,0179 | 1,37294       | -2,62993      | 0,00854034  | 0,0459581   | yes |
| dicA      | ChrI_A_nidulans_FGSC_A4:746953-748089      | WT_5hasex | WT_veg | OK | 63,8586 | 260,615 | 2,02897       | -3,90421      | 9,45341E-05 | 0,00104361  | yes |
| didB      | ChrVIII_A_nidulans_FGSC_A4:510377-511315   | WT_5hasex | WT_veg | OK | 176,366 | 580,597 | 1,71896       | -3,58114      | 0,0003421   | 0,00314725  | yes |
| elfA      | ChrVIII_A_nidulans_FGSC_A4:232291-233046   | WT_5hasex | WT_veg | OK | 403,654 | 1663,98 | 2,04345       | -3,89074      | 9,99404E-05 | 0,00109471  | yes |
| enaB      | ChrVII_A_nidulans_FGSC_A4:1406950-1410237  | WT_5hasex | WT_veg | OK | 1,95435 | 12,8047 | 2,71191       | -3,63579      | 0,000277128 | 0,00263702  | yes |
| esdC      | ChrVI_A_nidulans_FGSC_A4:375209-377044     | WT_5hasex | WT_veg | OK | 489,129 | 3271,67 | 2,74174       | -3,65006      | 0,000262174 | 0,00251989  | yes |
| faaA      | ChrI_A_nidulans_FGSC_A4:1507962-1510775    | WT_5hasex | WT_veg | OK | 128,005 | 398,802 | 1,63947       | -3,10021      | 0,00193382  | 0,0135712   | yes |
| fabM      | ChrII_A_nidulans_FGSC_A4:2376172-2378756   | WT_5hasex | WT_veg | OK | 55,1762 | 214,153 | 1,95652       | -3,9834       | 6,79366E-05 | 0,000783109 | yes |
| facB      | ChrVIII_A_nidulans_FGSC_A4:2782107-2785113 | WT_5hasex | WT_veg | OK | 63,8289 | 176,097 | 1,46409       | -2,93077      | 0,00338127  | 0,0216212   | yes |
| facC      | ChrVIII_A_nidulans_FGSC_A4:1645648-1648234 | WT_5hasex | WT_veg | OK | 46,5983 | 123,271 | 1,40349       | -2,85944      | 0,00424388  | 0,0260591   | yes |
| fadA      | ChrVIII_A_nidulans_FGSC_A4:2883465-2885283 | WT_5hasex | WT_veg | OK | 49,2958 | 135,693 | 1,46081       | -3,04307      | 0,00234176  | 0,015914    | yes |
| faoA      | ChrII_A_nidulans_FGSC_A4:822117-823880     | WT_5hasex | WT_veg | OK | 45,8691 | 810,519 | 4,14325       | -6,9044       | 5,04174E-12 | 2,54281E-10 | yes |
| fasA      | ChrVIII_A_nidulans_FGSC_A4:532852-538683   | WT_5hasex | WT_veg | OK | 138,672 | 805,79  | 2,53873       | -4,10991      | 3,95816E-05 | 0,000488517 | yes |
| fasB      | ChrVIII_A_nidulans_FGSC_A4:540287-546767   | WT_5hasex | WT_veg | OK | 182,288 | 746,153 | 2,03325       | -3,12539      | 0,00177569  | 0,0126615   | yes |
| faaA      | ChrVI_A_nidulans_FGSC_A4:2525617-2527251   | WT_5hasex | WT_veg | OK | 1007,26 | 3865,15 | 1,94009       | -3,03955      | 0,00236931  | 0,0160825   | yes |
| fbpZ      | ChrI_A_nidulans_FGSC_A4:2974137-2976004    | WT_5hasex | WT_veg | OK | 114,336 | 518,11  | 2,17998       | -4,34369      | 1,40106E-05 | 0,000194537 | yes |
| fhbA      | ChrIV_A_nidulans_FGSC_A4:795898-797379     | WT_5hasex | WT_veg | OK | 615,664 | 143,344 | -2,10266      | 3,29382       | 0,000988375 | 0,00777087  | yes |
| fhbB      | ChrII_A_nidulans_FGSC_A4:3904791-3906076   | WT_5hasex | WT_veg | OK | 2,76432 | 20,3773 | 2,88197       | -4,03569      | 5,44418E-05 | 0,000645006 | yes |
| fhpA      | ChrIII_A_nidulans_FGSC_A4:1782644-1784126  | WT_5hasex | WT_veg | OK | 2,32431 | 18,2306 | 2,97148       | -4,03492      | 5,46213E-05 | 0,000646839 | yes |
| FKBP5     | ChrII_A_nidulans_FGSC_A4:2691850-2693836   | WT_5hasex | WT_veg | OK | 72,5686 | 358,855 | 2,30598       | -4,67758      | 2,90285E-06 | 4,76701E-05 | yes |
| fphA      | ChrVII_A_nidulans_FGSC_A4:141220-145309    | WT_5hasex | WT_veg | OK | 30,3454 | 84,3266 | 1,47451       | -2,99875      | 0,00271091  | 0,0179546   | yes |
| gcnE      | ChrII_A_nidulans_FGSC_A4:3567624-3569139   | WT_5hasex | WT_veg | OK | 17,5196 | 49,2324 | 1,49064       | -2,67666      | 0,00743604  | 0,0411037   | yes |
| gelC      | ChrII_A_nidulans_FGSC_A4:3249001-3251282   | WT_5hasex | WT_veg | OK | 114,315 | 41,4831 | -1,46242      | 2,91564       | 0,00354965  | 0,0225083   | yes |
| gelD      | ChrVII_A_nidulans_FGSC_A4:348173-350191    | WT_5hasex | WT_veg | OK | 341,63  | 9,37753 | -5,18708      | 6,774         | 1,25266E-11 | 5,87665E-10 | yes |
| gfdA      | ChrVIII_A_nidulans_FGSC_A4:3827963-3829778 | WT_5hasex | WT_veg | OK | 93,2449 | 232,824 | 1,32014       | -2,71442      | 0,00663909  | 0,0375339   | yes |
| gfdB      | ChrI_A_nidulans_FGSC_A4:3189570-3190910    | WT_5hasex | WT_veg | OK | 23,9951 | 173,683 | 2,85564       | -5,29621      | 1,18228E-07 | 2,70542E-06 | yes |
| glab      | ChrIV_A_nidulans_FGSC_A4:63625-65705       | WT_5hasex | WT_veg | OK | 3,7596  | 0       | -1.79769e+308 | -1.79769e+308 | 0,00911834  | 0,0484275   | yes |
| glbB      | ChrV_A_nidulans_FGSC_A4:2398938-2400534    | WT_5hasex | WT_veg | OK | 653,465 | 2056,71 | 1,65416       | -2,79629      | 0,00516924  | 0,0305388   | yes |
| glkA      | ChrIII_A_nidulans_FGSC_A4:3118546-3120071  | WT_5hasex | WT_veg | OK | 350,204 | 935,901 | 1,41816       | -2,64359      | 0,00820317  | 0,0444592   | yes |
| gmtA      | ChrIII_A_nidulans_FGSC_A4:2604118-2605585  | WT_5hasex | WT_veg | OK | 65,2059 | 163,738 | 1,32831       | -2,73249      | 0,00628572  | 0,0358924   | yes |
| gpgA      | ChrVI_A_nidulans_FGSC_A4:2948436-2949317   | WT_5hasex | WT_veg | OK | 128,659 | 327,561 | 1,34821       | -2,80907      | 0,00496843  | 0,0295859   | yes |

## Supplementary table 2

|        |                                            |           |        |    |          |         |               |               |             |             |     |
|--------|--------------------------------------------|-----------|--------|----|----------|---------|---------------|---------------|-------------|-------------|-----|
| gprC   | ChrII_A_nidulans_FGSC_A4:3127715-3129185   | WT_5hasex | WT_veg | OK | 26,6114  | 73,7008 | 1,46964       | -2,89176      | 0,00383085  | 0,0239562   | yes |
| gprE   | ChrVI_A_nidulans_FGSC_A4:134873-137479     | WT_5hasex | WT_veg | OK | 44,7515  | 111,047 | 1,31116       | -2,70864      | 0,00675596  | 0,0380714   | yes |
| gprI   | ChrV_A_nidulans_FGSC_A4:195341-196371      | WT_5hasex | WT_veg | OK | 0,526418 | 8,06019 | 3,93653       | -3,13091      | 0,00174263  | 0,0124597   | yes |
| gprJ   | ChrV_A_nidulans_FGSC_A4:1894600-1896179    | WT_5hasex | WT_veg | OK | 22,3198  | 173,037 | 2,95469       | -5,47607      | 4,34867E-08 | 1,0961E-06  | yes |
| gpxA   | ChrVI_A_nidulans_FGSC_A4:2616847-2617800   | WT_5hasex | WT_veg | OK | 221,58   | 575,091 | 1,37596       | -2,75067      | 0,00594728  | 0,0342359   | yes |
| gsdA   | ChrVI_A_nidulans_FGSC_A4:2183691-2186179   | WT_5hasex | WT_veg | OK | 365,803  | 1090,39 | 1,57571       | -2,78888      | 0,005289    | 0,031113    | yes |
| gstB   | ChrI_A_nidulans_FGSC_A4:1467522-1468493    | WT_5hasex | WT_veg | OK | 36,3429  | 177,143 | 2,28517       | -3,75865      | 0,000170834 | 0,00174063  | yes |
| gukA   | ChrII_A_nidulans_FGSC_A4:3516468-3517583   | WT_5hasex | WT_veg | OK | 39,2802  | 149,752 | 1,9307        | -3,83597      | 0,000125067 | 0,00133442  | yes |
| H4.2   | ChrVII_A_nidulans_FGSC_A4:3917581-3918364  | WT_5hasex | WT_veg | OK | 770,165  | 2593,26 | 1,75153       | -3,11025      | 0,00186926  | 0,013184    | yes |
| halA   | ChrIII_A_nidulans_FGSC_A4:2662463-2664953  | WT_5hasex | WT_veg | OK | 163,964  | 914,486 | 2,47958       | -4,6797       | 0,000002873 | 4,72391E-05 | yes |
| hapE   | ChrI_A_nidulans_FGSC_A4:2280414-2284598    | WT_5hasex | WT_veg | OK | 141,644  | 367,392 | 1,37505       | -2,80054      | 0,00510174  | 0,030232    | yes |
| hisHF  | ChrIV_A_nidulans_FGSC_A4:1520618-1522588   | WT_5hasex | WT_veg | OK | 91,9219  | 233,906 | 1,34745       | -2,75544      | 0,00586132  | 0,0338377   | yes |
| hk2    | ChrII_A_nidulans_FGSC_A4:294244-296249     | WT_5hasex | WT_veg | OK | 15,1454  | 53,2045 | 1,81267       | -3,50406      | 0,000458223 | 0,00404171  | yes |
| hogA   | ChrVIII_A_nidulans_FGSC_A4:1787245-1789386 | WT_5hasex | WT_veg | OK | 573,956  | 2509,45 | 2,12836       | -3,51604      | 0,000438028 | 0,00388516  | yes |
| hsp104 | ChrVIII_A_nidulans_FGSC_A4:2252755-2255831 | WT_5hasex | WT_veg | OK | 568,042  | 2032,7  | 1,83933       | -2,7206       | 0,0065164   | 0,0369919   | yes |
| hulA   | ChrVIII_A_nidulans_FGSC_A4:787321-790823   | WT_5hasex | WT_veg | OK | 77,9288  | 217,624 | 1,48161       | -3,00134      | 0,00268792  | 0,0178294   | yes |
| hulE   | ChrVII_A_nidulans_FGSC_A4:2408555-2421143  | WT_5hasex | WT_veg | OK | 19,0287  | 68,5255 | 1,84846       | -3,70439      | 0,0002119   | 0,00209311  | yes |
| hxA    | ChrV_A_nidulans_FGSC_A4:2211297-2215583    | WT_5hasex | WT_veg | OK | 90,7167  | 745,643 | 3,03905       | -5,12625      | 2,95564E-07 | 6,18537E-06 | yes |
| hxB    | ChrVII_A_nidulans_FGSC_A4:1435983-1438647  | WT_5hasex | WT_veg | OK | 12,2071  | 43,25   | 1,82498       | -3,46795      | 0,000524436 | 0,0045334   | yes |
| hxkA   | ChrIV_A_nidulans_FGSC_A4:1608306-1610025   | WT_5hasex | WT_veg | OK | 230,159  | 858,294 | 1,89884       | -3,58211      | 0,000340832 | 0,00313851  | yes |
| ileA   | ChrII_A_nidulans_FGSC_A4:2922952-2925077   | WT_5hasex | WT_veg | OK | 25,8688  | 65,6172 | 1,34286       | -2,6952       | 0,00703468  | 0,0392788   | yes |
| ivoB   | ChrVIII_A_nidulans_FGSC_A4:4208565-4209844 | WT_5hasex | WT_veg | OK | 214,457  | 8,3293  | -4,68635      | 6,6609        | 2,72158E-11 | 1,20351E-09 | yes |
| ivoC   | ChrIII_A_nidulans_FGSC_A4:1431691-1433386  | WT_5hasex | WT_veg | OK | 6,81048  | 0       | -1.79769e+308 | -1.79769e+308 | 0,00527214  | 0,0310347   | yes |
| jlbA   | ChrVII_A_nidulans_FGSC_A4:1964062-1965095  | WT_5hasex | WT_veg | OK | 302,758  | 1629,73 | 2,42839       | -4,7328       | 2,21442E-06 | 3,75656E-05 | yes |
| kapI   | ChrV_A_nidulans_FGSC_A4:1899834-1903567    | WT_5hasex | WT_veg | OK | 72,0124  | 195,828 | 1,44327       | -2,90731      | 0,0036455   | 0,0229992   | yes |
| kgdB   | ChrVI_A_nidulans_FGSC_A4:634354-637153     | WT_5hasex | WT_veg | OK | 294,17   | 770,121 | 1,38844       | -2,61358      | 0,00895981  | 0,0478118   | yes |
| ladB   | ChrIII_A_nidulans_FGSC_A4:2351901-2353104  | WT_5hasex | WT_veg | OK | 32,1002  | 9,12944 | -1,81398      | 3,031         | 0,00243746  | 0,0164603   | yes |
| lccD   | ChrVIII_A_nidulans_FGSC_A4:2188614-2190529 | WT_5hasex | WT_veg | OK | 28,1323  | 9,8207  | -1,51833      | 2,90925       | 0,00362297  | 0,0228846   | yes |
| lreB   | ChrII_A_nidulans_FGSC_A4:3630733-3632041   | WT_5hasex | WT_veg | OK | 7,12293  | 26,5849 | 1,90007       | -2,9857       | 0,00282932  | 0,0186135   | yes |
| maeA   | ChrI_A_nidulans_FGSC_A4:1031633-1033880    | WT_5hasex | WT_veg | OK | 78,5002  | 487,899 | 2,63581       | -5,42662      | 5,74323E-08 | 1,41427E-06 | yes |
| maiA   | ChrVII_A_nidulans_FGSC_A4:2182403-2183268  | WT_5hasex | WT_veg | OK | 17,0023  | 60,9156 | 1,84108       | -2,96779      | 0,00299952  | 0,0195416   | yes |
| mbf1   | ChrVI_A_nidulans_FGSC_A4:2144521-2147001   | WT_5hasex | WT_veg | OK | 321,034  | 1201,17 | 1,90364       | -3,39459      | 0,000687321 | 0,00570612  | yes |
| mdpA   | ChrVIII_A_nidulans_FGSC_A4:4458695-4460205 | WT_5hasex | WT_veg | OK | 1,12835  | 22,6884 | 4,32967       | -4,56687      | 4,95053E-06 | 7,67054E-05 | yes |
| meaA   | ChrIV_A_nidulans_FGSC_A4:1615942-1618264   | WT_5hasex | WT_veg | OK | 301,534  | 1015,85 | 1,75229       | -3,23649      | 0,00121009  | 0,00918471  | yes |
| meaB   | ChrIII_A_nidulans_FGSC_A4:618106-620369    | WT_5hasex | WT_veg | OK | 29,9993  | 233,384 | 2,95971       | -6,08384      | 1,17338E-09 | 4,09918E-08 | yes |
| metE   | ChrVII_A_nidulans_FGSC_A4:3267092-3269073  | WT_5hasex | WT_veg | OK | 39,9354  | 157,481 | 1,97943       | -4,0736       | 4,62914E-05 | 0,000559668 | yes |
| mid1   | ChrIII_A_nidulans_FGSC_A4:2620162-2622472  | WT_5hasex | WT_veg | OK | 23,4074  | 59,3016 | 1,34111       | -2,74313      | 0,00608575  | 0,0349294   | yes |
| mipA   | ChrVIII_A_nidulans_FGSC_A4:2818652-2820525 | WT_5hasex | WT_veg | OK | 52,7617  | 157,682 | 1,57945       | -3,2409       | 0,00119155  | 0,00907577  | yes |
| mnpA   | ChrVII_A_nidulans_FGSC_A4:4048932-4049431  | WT_5hasex | WT_veg | OK | 53,0363  | 231,876 | 2,1283        | -3,75877      | 0,000170748 | 0,00174009  | yes |
| mns1B  | ChrVIII_A_nidulans_FGSC_A4:2473064-2474751 | WT_5hasex | WT_veg | OK | 53,8915  | 147,655 | 1,4541        | -2,8865       | 0,00389554  | 0,0242671   | yes |
| mpkB   | ChrII_A_nidulans_FGSC_A4:3287538-3288944   | WT_5hasex | WT_veg | OK | 170,704  | 428,705 | 1,32849       | -2,68618      | 0,00722737  | 0,0401621   | yes |
| mshA   | ChrVII_A_nidulans_FGSC_A4:1678180-1682022  | WT_5hasex | WT_veg | OK | 17,6987  | 48,8573 | 1,46493       | -2,9446       | 0,00323367  | 0,0208043   | yes |
| msrA   | ChrIII_A_nidulans_FGSC_A4:1810538-1811488  | WT_5hasex | WT_veg | OK | 93,927   | 272,237 | 1,53525       | -3,18471      | 0,00144901  | 0,0106689   | yes |
| msrB   | ChrVII_A_nidulans_FGSC_A4:2303180-2303714  | WT_5hasex | WT_veg | OK | 42,8546  | 201,156 | 2,2308        | -3,97955      | 6,90463E-05 | 0,000794503 | yes |
| mtr4   | ChrIII_A_nidulans_FGSC_A4:2124623-2128055  | WT_5hasex | WT_veg | OK | 14,3422  | 65,5968 | 2,19336       | -4,40293      | 0,00001068  | 0,000152349 | yes |
| myoA   | ChrVII_A_nidulans_FGSC_A4:1166695-1171248  | WT_5hasex | WT_veg | OK | 37,4242  | 98,2277 | 1,39216       | -2,9116       | 0,00359586  | 0,0227463   | yes |

## Supplementary table 2

|       |                                            |           |        |    |         |         |          |          |             |             |     |
|-------|--------------------------------------------|-----------|--------|----|---------|---------|----------|----------|-------------|-------------|-----|
| nadA  | ChrI_A_nidulans_FGSC_A4:1325825-1326920    | WT_5hasex | WT_veg | OK | 28,1424 | 244,99  | 3,1219   | -5,96588 | 2,43312E-09 | 7,92421E-08 | yes |
| napA  | ChrIV_A_nidulans_FGSC_A4:1788866-1791254   | WT_5hasex | WT_veg | OK | 158,856 | 532,802 | 1,74588  | -3,29612 | 0,000980317 | 0,00772141  | yes |
| napB  | ChrII_A_nidulans_FGSC_A4:999810-1002123    | WT_5hasex | WT_veg | OK | 98,097  | 486,536 | 2,31027  | -4,77638 | 1,78478E-06 | 3,09587E-05 | yes |
| ndiF  | ChrVIII_A_nidulans_FGSC_A4:1539657-1542242 | WT_5hasex | WT_veg | OK | 120,65  | 1102,78 | 3,19225  | -6,02335 | 1,70846E-09 | 5,70596E-08 | yes |
| nic96 | ChrIV_A_nidulans_FGSC_A4:1406847-1410477   | WT_5hasex | WT_veg | OK | 37,2872 | 118,362 | 1,66646  | -3,44759 | 0,000565616 | 0,00483987  | yes |
| niiA  | ChrVIII_A_nidulans_FGSC_A4:1818280-1822109 | WT_5hasex | WT_veg | OK | 591,815 | 170,197 | -1,79794 | 2,69976  | 0,00693889  | 0,0388682   | yes |
| nkuB  | ChrIII_A_nidulans_FGSC_A4:1679477-1682080  | WT_5hasex | WT_veg | OK | 50,232  | 129,699 | 1,36849  | -2,78919 | 0,00528396  | 0,0310868   | yes |
| nop10 | ChrII_A_nidulans_FGSC_A4:1290279-1290956   | WT_5hasex | WT_veg | OK | 152,975 | 657,854 | 2,10447  | -4,10316 | 4,07538E-05 | 0,000501309 | yes |
| nop58 | ChrVI_A_nidulans_FGSC_A4:1604575-1606823   | WT_5hasex | WT_veg | OK | 64,9903 | 503,767 | 2,95446  | -5,76331 | 8,24798E-09 | 2,43636E-07 | yes |
| nsa2  | ChrVI_A_nidulans_FGSC_A4:2371777-2373026   | WT_5hasex | WT_veg | OK | 43,2869 | 173,061 | 1,99928  | -3,90871 | 0,000092791 | 0,00102841  | yes |
| nsdC  | ChrII_A_nidulans_FGSC_A4:1585557-1587489   | WT_5hasex | WT_veg | OK | 24,3836 | 59,9122 | 1,29694  | -2,63775 | 0,00834591  | 0,0450729   | yes |
| nup2  | ChrV_A_nidulans_FGSC_A4:2654654-2659037    | WT_5hasex | WT_veg | OK | 16,2851 | 52,535  | 1,68973  | -3,46964 | 0,000521156 | 0,00450951  | yes |
| nup57 | ChrVIII_A_nidulans_FGSC_A4:1630667-1632269 | WT_5hasex | WT_veg | OK | 27,9305 | 95,4665 | 1,77315  | -3,54196 | 0,000397172 | 0,00357091  | yes |
| nup84 | ChrVIII_A_nidulans_FGSC_A4:1239737-1243109 | WT_5hasex | WT_veg | OK | 34,6205 | 93,1737 | 1,4283   | -2,96608 | 0,00301625  | 0,019632    | yes |
| oefB  | ChrI_A_nidulans_FGSC_A4:3564595-3565373    | WT_5hasex | WT_veg | OK | 58,052  | 244,667 | 2,0754   | -3,83415 | 0,000125997 | 0,00134306  | yes |
| otaA  | ChrVII_A_nidulans_FGSC_A4:1958897-1960694  | WT_5hasex | WT_veg | OK | 65,1454 | 315,673 | 2,2767   | -4,73606 | 2,17914E-06 | 3,70751E-05 | yes |
| pacA  | ChrIV_A_nidulans_FGSC_A4:869878-871226     | WT_5hasex | WT_veg | OK | 322,792 | 36,2893 | -3,15299 | 4,7153   | 2,41358E-06 | 4,05113E-05 | yes |
| palcA | ChrII_A_nidulans_FGSC_A4:1342159-1344993   | WT_5hasex | WT_veg | OK | 19,7348 | 90,7663 | 2,20141  | -4,39616 | 1,10185E-05 | 0,000156644 | yes |
| par1  | ChrII_A_nidulans_FGSC_A4:2187718-2188472   | WT_5hasex | WT_veg | OK | 90,4073 | 326,971 | 1,85465  | -3,55692 | 0,000375235 | 0,00340301  | yes |
| pbsA  | ChrVIII_A_nidulans_FGSC_A4:2030938-2033306 | WT_5hasex | WT_veg | OK | 56,2561 | 166,22  | 1,56302  | -3,1782  | 0,00148193  | 0,0108793   | yes |
| pdeB  | ChrVI_A_nidulans_FGSC_A4:2954204-2957249   | WT_5hasex | WT_veg | OK | 17,875  | 152,078 | 3,08879  | -6,2105  | 5,28163E-10 | 1,9615E-08  | yes |
| pdhB  | ChrV_A_nidulans_FGSC_A4:1346355-1347968    | WT_5hasex | WT_veg | OK | 584,857 | 1711,04 | 1,54872  | -2,76338 | 0,00572069  | 0,0332124   | yes |
| pdhC  | ChrVIII_A_nidulans_FGSC_A4:525522-527170   | WT_5hasex | WT_veg | OK | 359,05  | 1050,2  | 1,5484   | -2,93157 | 0,00337248  | 0,0215729   | yes |
| pdkA  | ChrI_A_nidulans_FGSC_A4:2057539-2060132    | WT_5hasex | WT_veg | OK | 28,8409 | 3,35179 | -3,10511 | 5,62252  | 1,88191E-08 | 5,12555E-07 | yes |
| pepJ  | ChrII_A_nidulans_FGSC_A4:333193-334709     | WT_5hasex | WT_veg | OK | 104,548 | 26,3511 | -1,98822 | 4,08308  | 4,44436E-05 | 0,000540865 | yes |
| pgaB  | ChrIII_A_nidulans_FGSC_A4:2234981-2236137  | WT_5hasex | WT_veg | OK | 42,3431 | 308,877 | 2,86683  | -5,24124 | 1,59504E-07 | 3,54016E-06 | yes |
| pgaC  | ChrV_A_nidulans_FGSC_A4:142833-144133      | WT_5hasex | WT_veg | OK | 21,7968 | 5,19063 | -2,07013 | 3,09336  | 0,00197902  | 0,0138624   | yes |
| pgmA  | ChrVI_A_nidulans_FGSC_A4:1975032-1976807   | WT_5hasex | WT_veg | OK | 252,379 | 1939,98 | 2,94238  | -5,44826 | 5,08663E-08 | 1,26627E-06 | yes |
| phbB  | ChrI_A_nidulans_FGSC_A4:3402197-3403123    | WT_5hasex | WT_veg | OK | 20,448  | 71,933  | 1,81469  | -2,96592 | 0,00301778  | 0,0196395   | yes |
| phiA  | ChrV_A_nidulans_FGSC_A4:156984-157735      | WT_5hasex | WT_veg | OK | 188,471 | 9,37504 | -4,32938 | 6,80749  | 9,93161E-12 | 4,74851E-10 | yes |
| phk   | ChrIII_A_nidulans_FGSC_A4:578144-580985    | WT_5hasex | WT_veg | OK | 24,2712 | 137,925 | 2,50656  | -5,2008  | 1,98437E-07 | 4,32369E-06 | yes |
| phkB  | ChrVI_A_nidulans_FGSC_A4:1828387-1834151   | WT_5hasex | WT_veg | OK | 32,8472 | 138,462 | 2,07565  | -4,23407 | 2,29501E-05 | 0,00030126  | yes |
| pho8  | ChrIII_A_nidulans_FGSC_A4:1800922-1803057  | WT_5hasex | WT_veg | OK | 57,3689 | 191,832 | 1,7415   | -3,38488 | 0,000712097 | 0,00587828  | yes |
| pho80 | ChrV_A_nidulans_FGSC_A4:1316006-1317687    | WT_5hasex | WT_veg | OK | 95,4488 | 286,736 | 1,58692  | -3,22043 | 0,00127997  | 0,0096203   | yes |
| phoA  | ChrII_A_nidulans_FGSC_A4:1314064-1315312   | WT_5hasex | WT_veg | OK | 48,0296 | 232,21  | 2,27343  | -4,53867 | 5,66099E-06 | 8,65366E-05 | yes |
| pilA  | ChrV_A_nidulans_FGSC_A4:1523652-1525517    | WT_5hasex | WT_veg | OK | 622,317 | 3518,63 | 2,49929  | -3,6094  | 0,000306905 | 0,00287597  | yes |
| pinA  | ChrI_A_nidulans_FGSC_A4:1100804-1101841    | WT_5hasex | WT_veg | OK | 151,872 | 402,915 | 1,40762  | -2,88874 | 0,00386793  | 0,0241381   | yes |
| pkcA  | ChrVIII_A_nidulans_FGSC_A4:4594432-4598641 | WT_5hasex | WT_veg | OK | 64,5146 | 256,832 | 1,99313  | -3,89703 | 9,73803E-05 | 0,00107047  | yes |
| pkcB  | ChrI_A_nidulans_FGSC_A4:1627339-1630007    | WT_5hasex | WT_veg | OK | 89,6701 | 218,29  | 1,28354  | -2,6259  | 0,00864213  | 0,0464001   | yes |
| pldA  | ChrI_A_nidulans_FGSC_A4:2940007-2943407    | WT_5hasex | WT_veg | OK | 85,6029 | 480,539 | 2,48892  | -4,73743 | 2,16448E-06 | 3,68736E-05 | yes |
| pmcB  | ChrIII_A_nidulans_FGSC_A4:553962-557728    | WT_5hasex | WT_veg | OK | 19,3587 | 68,899  | 1,8315   | -3,78669 | 0,000152668 | 0,00157825  | yes |
| ppgA  | ChrV_A_nidulans_FGSC_A4:1695653-1696040    | WT_5hasex | WT_veg | OK | 22,0834 | 87,9935 | 1,99443  | -3,05369 | 0,00226046  | 0,0154698   | yes |
| ppoA  | ChrVII_A_nidulans_FGSC_A4:2422295-2425863  | WT_5hasex | WT_veg | OK | 33,5492 | 131,365 | 1,96923  | -4,10216 | 4,09316E-05 | 0,000503143 | yes |
| prp8  | ChrIII_A_nidulans_FGSC_A4:1766887-1775944  | WT_5hasex | WT_veg | OK | 21,278  | 52,3613 | 1,29914  | -2,67046 | 0,00757478  | 0,0417521   | yes |
| prpA  | ChrVI_A_nidulans_FGSC_A4:1731681-1734014   | WT_5hasex | WT_veg | OK | 25,7782 | 171,674 | 2,73545  | -5,439   | 5,35808E-08 | 1,32879E-06 | yes |
| ptkA  | ChrIII_A_nidulans_FGSC_A4:2556913-2559245  | WT_5hasex | WT_veg | OK | 48,2749 | 131,975 | 1,45092  | -3,01913 | 0,00253505  | 0,0170136   | yes |

## Supplementary table 2

|         |                                            |           |        |    |          |         |          |          |             |             |     |
|---------|--------------------------------------------|-----------|--------|----|----------|---------|----------|----------|-------------|-------------|-----|
| ptpA    | ChrIV_A_nidulans_FGSC_A4:1402143-1404770   | WT_5hasex | WT_veg | OK | 83,9597  | 412,83  | 2,29778  | -4,64582 | 3,38728E-06 | 5,47502E-05 | yes |
| pyrABCN | ChrVIII_A_nidulans_FGSC_A4:3153607-3160488 | WT_5hasex | WT_veg | OK | 17,9942  | 139,166 | 2,9512   | -6,10872 | 1,00431E-09 | 3,54875E-08 | yes |
| pyroA   | ChrIV_A_nidulans_FGSC_A4:2484766-2486046   | WT_5hasex | WT_veg | OK | 70,3308  | 304,494 | 2,11419  | -4,16919 | 3,05688E-05 | 0,00038981  | yes |
| qutC    | ChrVIII_A_nidulans_FGSC_A4:1407966-1409100 | WT_5hasex | WT_veg | OK | 0,913222 | 6,50386 | 2,83226  | -2,75972 | 0,00578503  | 0,0335229   | yes |
| qutG    | ChrVIII_A_nidulans_FGSC_A4:1414351-1415560 | WT_5hasex | WT_veg | OK | 1,21694  | 7,51576 | 2,62666  | -3,06468 | 0,00217903  | 0,0150165   | yes |
| racA    | ChrIII_A_nidulans_FGSC_A4:1120421-1122031  | WT_5hasex | WT_veg | OK | 73,8288  | 186,686 | 1,33836  | -2,67452 | 0,00748373  | 0,0413281   | yes |
| ran     | ChrV_A_nidulans_FGSC_A4:2667877-2669388    | WT_5hasex | WT_veg | OK | 610,514  | 1652,71 | 1,43673  | -2,63381 | 0,00844336  | 0,0455241   | yes |
| rcnA    | ChrI_A_nidulans_FGSC_A4:758751-760166      | WT_5hasex | WT_veg | OK | 231,732  | 1333,37 | 2,52455  | -4,21368 | 2,51239E-05 | 0,000326712 | yes |
| rhbA    | ChrIII_A_nidulans_FGSC_A4:2550568-2551498  | WT_5hasex | WT_veg | OK | 186,587  | 474,157 | 1,34551  | -2,79923 | 0,00512251  | 0,0303174   | yes |
| rmtA    | ChrII_A_nidulans_FGSC_A4:1665856-1667343   | WT_5hasex | WT_veg | OK | 65,3938  | 205,251 | 1,65016  | -3,38843 | 0,000702933 | 0,00581637  | yes |
| rodA    | ChrIII_A_nidulans_FGSC_A4:2762001-2762880  | WT_5hasex | WT_veg | OK | 93,0036  | 3,02418 | -4,94267 | 5,71989  | 1,06596E-08 | 3,07083E-07 | yes |
| rosA    | ChrV_A_nidulans_FGSC_A4:1381977-1384246    | WT_5hasex | WT_veg | OK | 10,0829  | 33,0763 | 1,71388  | -2,76894 | 0,00562397  | 0,0327198   | yes |
| rrp5    | ChrVII_A_nidulans_FGSC_A4:3025906-3031458  | WT_5hasex | WT_veg | OK | 15,4372  | 80,6074 | 2,3845   | -4,91846 | 8,72274E-07 | 0,000016255 | yes |
| rrpB    | ChrIII_A_nidulans_FGSC_A4:982401-986585    | WT_5hasex | WT_veg | OK | 1,24478  | 4,57605 | 1,87821  | -2,60434 | 0,00920501  | 0,0487726   | yes |
| rsdA    | ChrVII_A_nidulans_FGSC_A4:1052989-1056433  | WT_5hasex | WT_veg | OK | 10,7396  | 61,2355 | 2,51143  | -4,31539 | 1,59324E-05 | 0,000218901 | yes |
| rsmA    | ChrIII_A_nidulans_FGSC_A4:1659438-1660536  | WT_5hasex | WT_veg | OK | 16,4238  | 64,3574 | 1,97032  | -3,39594 | 0,000683926 | 0,00567883  | yes |
| schA    | ChrII_A_nidulans_FGSC_A4:1650876-1654253   | WT_5hasex | WT_veg | OK | 70,3291  | 260,279 | 1,88787  | -3,68111 | 0,000232218 | 0,00226521  | yes |
| sdeA    | ChrI_A_nidulans_FGSC_A4:3001976-3003856    | WT_5hasex | WT_veg | OK | 793,825  | 3443,62 | 2,11703  | -3,21866 | 0,00128791  | 0,00967446  | yes |
| sds3    | ChrVI_A_nidulans_FGSC_A4:1575336-1577053   | WT_5hasex | WT_veg | OK | 20,3349  | 62,0583 | 1,60967  | -3,13412 | 0,00172369  | 0,0123361   | yes |
| sgdA    | ChrVIII_A_nidulans_FGSC_A4:3797354-3801144 | WT_5hasex | WT_veg | OK | 138,824  | 382,434 | 1,46196  | -2,83494 | 0,00458342  | 0,0277376   | yes |
| sgdE    | ChrI_A_nidulans_FGSC_A4:1517782-1520435    | WT_5hasex | WT_veg | OK | 472,338  | 1472,94 | 1,64081  | -2,67367 | 0,0075027   | 0,0414154   | yes |
| shoA    | ChrIV_A_nidulans_FGSC_A4:2412655-2414542   | WT_5hasex | WT_veg | OK | 100,257  | 316,116 | 1,65675  | -3,35276 | 0,000800091 | 0,00649417  | yes |
| sidA    | ChrI_A_nidulans_FGSC_A4:2141074-2142848    | WT_5hasex | WT_veg | OK | 124,118  | 21,1218 | -2,55491 | 5,09189  | 3,54514E-07 | 7,28233E-06 | yes |
| sitA    | ChrVI_A_nidulans_FGSC_A4:2396816-2399624   | WT_5hasex | WT_veg | OK | 268,611  | 1357,64 | 2,33752  | -4,02392 | 5,72375E-05 | 0,00067371  | yes |
| spaA    | ChrII_A_nidulans_FGSC_A4:2973333-2976173   | WT_5hasex | WT_veg | OK | 11,9494  | 34,6521 | 1,536    | -2,93411 | 0,00334501  | 0,0214362   | yes |
| spb4    | ChrVI_A_nidulans_FGSC_A4:1579516-1581538   | WT_5hasex | WT_veg | OK | 7,83936  | 50,6653 | 2,69219  | -4,58472 | 4,54593E-06 | 7,10033E-05 | yes |
| spgA    | ChrIV_A_nidulans_FGSC_A4:686344-688637     | WT_5hasex | WT_veg | OK | 87,0356  | 252,136 | 1,53452  | -3,19873 | 0,00138033  | 0,0102439   | yes |
| sreA    | ChrVIII_A_nidulans_FGSC_A4:4363947-4365712 | WT_5hasex | WT_veg | OK | 21,9859  | 70,5572 | 1,68221  | -3,29461 | 0,0009856   | 0,00775487  | yes |
| srgA    | ChrIV_A_nidulans_FGSC_A4:1433698-1434439   | WT_5hasex | WT_veg | OK | 161,86   | 449,041 | 1,4721   | -3,00668 | 0,00264119  | 0,0175818   | yes |
| srgH    | ChrII_A_nidulans_FGSC_A4:2892108-2893714   | WT_5hasex | WT_veg | OK | 150,927  | 364,115 | 1,27054  | -2,60843 | 0,00909582  | 0,048326    | yes |
| srgL    | ChrVIII_A_nidulans_FGSC_A4:4702501-4705778 | WT_5hasex | WT_veg | OK | 29,9639  | 77,1733 | 1,36488  | -2,63937 | 0,00830603  | 0,0448992   | yes |
| srrA    | ChrII_A_nidulans_FGSC_A4:3369724-3371705   | WT_5hasex | WT_veg | OK | 32,6391  | 259,959 | 2,99361  | -5,85081 | 4,89182E-09 | 1,507E-07   | yes |
| srrC    | ChrII_A_nidulans_FGSC_A4:1985020-1985772   | WT_5hasex | WT_veg | OK | 23,4602  | 72,7335 | 1,63241  | -2,66678 | 0,00765824  | 0,0420966   | yes |
| ssoA    | ChrVI_A_nidulans_FGSC_A4:789469-791395     | WT_5hasex | WT_veg | OK | 140,176  | 480,624 | 1,77767  | -3,58198 | 0,000340997 | 0,00313931  | yes |
| surG    | ChrIII_A_nidulans_FGSC_A4:1519351-1520890  | WT_5hasex | WT_veg | OK | 443,451  | 2206,24 | 2,31474  | -4,17299 | 3,00624E-05 | 0,000384443 | yes |
| swoc    | ChrIII_A_nidulans_FGSC_A4:2598103-2600165  | WT_5hasex | WT_veg | OK | 176,049  | 868,907 | 2,30323  | -4,25834 | 2,05951E-05 | 0,000273568 | yes |
| swof    | ChrII_A_nidulans_FGSC_A4:2899123-2900843   | WT_5hasex | WT_veg | OK | 83,7351  | 202,245 | 1,2722   | -2,64088 | 0,00826909  | 0,044778    | yes |
| swoM    | ChrI_A_nidulans_FGSC_A4:1440748-1442761    | WT_5hasex | WT_veg | OK | 274,895  | 762,563 | 1,47198  | -2,69494 | 0,0070401   | 0,0392965   | yes |
| tcsA    | ChrV_A_nidulans_FGSC_A4:3228536-3230930    | WT_5hasex | WT_veg | OK | 50,3078  | 135,793 | 1,43256  | -2,99755 | 0,00272159  | 0,0180163   | yes |
| top1    | ChrVIII_A_nidulans_FGSC_A4:4134579-4137933 | WT_5hasex | WT_veg | OK | 44,4057  | 158,911 | 1,8394   | -3,78028 | 0,00015665  | 0,00161292  | yes |
| tpiB    | ChrI_A_nidulans_FGSC_A4:1841637-1842943    | WT_5hasex | WT_veg | OK | 109,973  | 345,208 | 1,65032  | -3,37267 | 0,000744442 | 0,006104    | yes |
| tpsA    | ChrV_A_nidulans_FGSC_A4:2521594-2524068    | WT_5hasex | WT_veg | OK | 226,402  | 919,495 | 2,02195  | -3,62946 | 0,000284011 | 0,00269225  | yes |
| treA    | ChrVIII_A_nidulans_FGSC_A4:333423-336481   | WT_5hasex | WT_veg | OK | 26,7418  | 96,352  | 1,84922  | -3,85162 | 0,000117337 | 0,00126256  | yes |
| trkB    | ChrII_A_nidulans_FGSC_A4:542654-545144     | WT_5hasex | WT_veg | OK | 14,3482  | 79,6437 | 2,47269  | -4,79375 | 1,63694E-06 | 2,86981E-05 | yes |
| trkC    | ChrVIII_A_nidulans_FGSC_A4:1989386-1991745 | WT_5hasex | WT_veg | OK | 15,981   | 44,5084 | 1,47772  | -2,805   | 0,00503164  | 0,0298841   | yes |
| uapC    | ChrI_A_nidulans_FGSC_A4:2999027-3000895    | WT_5hasex | WT_veg | OK | 84,3939  | 391,588 | 2,21413  | -4,57909 | 4,67001E-06 | 7,26597E-05 | yes |

## Supplementary table 2

|       |                                            |           |        |    |         |         |          |          |             |             |     |
|-------|--------------------------------------------|-----------|--------|----|---------|---------|----------|----------|-------------|-------------|-----|
| uaW   | ChrVIII_A_nidulans_FGSC_A4:4701323-4701980 | WT_5hasex | WT_veg | OK | 61,6204 | 255,324 | 2,05085  | -3,81271 | 0,000137452 | 0,00144575  | yes |
| uaX   | ChrVI_A_nidulans_FGSC_A4:2428608-2429055   | WT_5hasex | WT_veg | OK | 81,5357 | 1025,3  | 3,65247  | -6,76914 | 1,29552E-11 | 6,06141E-10 | yes |
| uaY   | ChrVIII_A_nidulans_FGSC_A4:2148804-2152088 | WT_5hasex | WT_veg | OK | 73,8915 | 26,9613 | -1,45452 | 2,90221  | 0,0037054   | 0,0233245   | yes |
| uaZ   | Chrl_A_nidulans_FGSC_A4:1659243-1660314    | WT_5hasex | WT_veg | OK | 2089,52 | 9735,02 | 2,22001  | -2,69625 | 0,00701249  | 0,0391883   | yes |
| URFA3 | Contig-mt197_A_nidulans_FGSC_A4:1082-2180  | WT_5hasex | WT_veg | OK | 2,40665 | 11,0776 | 2,20255  | -2,70673 | 0,00679501  | 0,0382503   | yes |
| usgS  | ChrIII_A_nidulans_FGSC_A4:1616942-1618221  | WT_5hasex | WT_veg | OK | 26,4312 | 138,979 | 2,39455  | -4,53128 | 5,86284E-06 | 8,92316E-05 | yes |
| uvsC  | ChrVIII_A_nidulans_FGSC_A4:1108553-1109991 | WT_5hasex | WT_veg | OK | 66,621  | 172,182 | 1,36989  | -2,84231 | 0,00447885  | 0,0272479   | yes |
| uvsD  | ChrV_A_nidulans_FGSC_A4:1352681-1355112    | WT_5hasex | WT_veg | OK | 22,2266 | 123,427 | 2,4733   | -4,90334 | 9,42204E-07 | 1,74173E-05 | yes |
| vcxA  | ChrVIII_A_nidulans_FGSC_A4:3454271-3456082 | WT_5hasex | WT_veg | OK | 75,4125 | 311,308 | 2,04547  | -4,2222  | 2,41925E-05 | 0,000315672 | yes |
| veA   | ChrVIII_A_nidulans_FGSC_A4:1667030-1669644 | WT_5hasex | WT_veg | OK | 64,7807 | 169,326 | 1,38617  | -2,61585 | 0,00890068  | 0,047535    | yes |
| vosA  | ChrVII_A_nidulans_FGSC_A4:2387002-2388952  | WT_5hasex | WT_veg | OK | 10,1007 | 34,8081 | 1,78497  | -2,94717 | 0,00320701  | 0,0206632   | yes |
| vps32 | ChrII_A_nidulans_FGSC_A4:1644608-1645447   | WT_5hasex | WT_veg | OK | 102,225 | 373,898 | 1,87089  | -3,8554  | 0,000115542 | 0,00124607  | yes |
| xanA  | ChrVIII_A_nidulans_FGSC_A4:3401427-3402667 | WT_5hasex | WT_veg | OK | 53,9356 | 362,549 | 2,74886  | -4,87556 | 1,08498E-06 | 1,97197E-05 | yes |
| xlnB  | ChrVIII_A_nidulans_FGSC_A4:416475-417187   | WT_5hasex | WT_veg | OK | 17,314  | 2,50636 | -2,78827 | 2,80044  | 0,00510332  | 0,0302346   | yes |
| yA    | Chrl_A_nidulans_FGSC_A4:2686882-2689030    | WT_5hasex | WT_veg | OK | 11,2656 | 47,3175 | 2,07045  | -3,72036 | 0,00019894  | 0,00198401  | yes |
| ypdA  | ChrVII_A_nidulans_FGSC_A4:2534012-2535212  | WT_5hasex | WT_veg | OK | 205,086 | 702,907 | 1,77711  | -3,57472 | 0,000350609 | 0,00321255  | yes |



## Supplementary table 3

|                                              | An      | log 2FC | Description                                                                                                                                                                                                                                     |
|----------------------------------------------|---------|---------|-------------------------------------------------------------------------------------------------------------------------------------------------------------------------------------------------------------------------------------------------|
| <b>Conidiation</b>                           |         |         |                                                                                                                                                                                                                                                 |
| abaA                                         | An0422  | 2,515   | TEA/ATTS domain transcriptional activator involved in regulation of conidiation; required for phialide differentiation                                                                                                                          |
| awh11                                        | An3725  | 4,076   | Developmentally regulated protein with similarity to <i>Candida albicans</i> Wh11p; transcription is repressed by StuA; expression upregulated after exposure to farnesol                                                                       |
| bemA                                         | An7030  | 1,245   | Polarisome component required for conidiation and vacuolar fusion; has similarity to <i>Saccharomyces cerevisiae</i> Bem1p                                                                                                                      |
| catA                                         | An8637  | 3,172   | Conidia-specific catalase; predicted role in gluconic acid and gluconate metabolism                                                                                                                                                             |
| cetJ                                         | An8638  | 2,204   | Transcript enriched in dormant conidia; induced by light in in developmentally competent mycelia                                                                                                                                                |
| cetL                                         | An9194  | 2,580   | Conidia Enriched Transcript                                                                                                                                                                                                                     |
| fabM                                         | An4000  | 1,957   | Protein with similarity to poly(A)-binding proteins; overexpression results in increased brIA expression and asexual development; expression reduced after exposure to farnesol                                                                 |
| fadA                                         | An0651  | 1,461   | Alpha subunit of a heterotrimeric G protein composed of FadA, SfaD, GpgA and involved in regulation of proliferation and conidiophore development; mutant produces increased amounts of extracellular proteinase during carbon starvation       |
| oefB                                         | An9451  | 2,075   | Protein of unknown function; overexpression confers the "fluffy" phenotype; transcript is induced by nitrate                                                                                                                                    |
| pho80                                        | An5156  | 1,587   | Pho80-like cyclin involved in regulation of development and phosphate homeostasis; interacts with the cyclin-dependent kinase PhoA                                                                                                              |
| piIA                                         | An5217  | 2,499   | Protein with similarity to sphingolipid long chain base-responsive protein Pil1; putative conserved eisosome component; expression upregulated after farnesol exposure; present at the conidial periphery and in punctate structures in mycelia |
| ppoA                                         | An1967  | 1,969   | Putative fatty acid dioxygenase; responsible for the formation of the oxylipin psiB-alpha; PpoA localizes to lipid bodies in Hulle cells and metulae                                                                                            |
| prpA                                         | An3129  | 2,735   | Putative protein disulfide isomerase; pdiB mRNA levels increase in the presence of farnesol                                                                                                                                                     |
| ptkA                                         | An8865  | 1,451   | Putative cyclin-dependent kinase; PITALRE motif; similarity to <i>S. pombe</i> Cdc9; constitutively expressed throughout development; localized to nucleus but nuclear localization is lost during mitosis                                      |
| surG                                         | An4615  | 2,315   | Transmembrane domain-containing protein with homology to <i>S. cerevisiae</i> Sur7p; SurG-GFP localizes perinuclearly and to patches in the periphery of spores and to the vacuole and endosomes of hyphae (                                    |
| tesA                                         | An5296  | 1,433   | Two-component signaling protein with histidine kinase and response regulator domains; involved in control of conidiation                                                                                                                        |
| tpsA                                         | An5523  | 2,022   | Putative alpha,alpha-trehalose-phosphate synthase (UDP-forming) with a role in trehalose biosynthesis; transcriptionally induced during spore germination and exponential growth; required for viability of conidia during prolonged storage    |
| treA                                         | An9340  | 1,849   | Alpha,alpha-trehalase with a role in trehalose hydrolysis; localized to the conidial cell wall; expression upregulated after exposure to farnesol                                                                                               |
| veA                                          | An1052  | 1,386   | Protein involved in light-sensitive control of differentiation and secondary metabolism; localizes to the nucleus in dark and to both nucleus and cytoplasm in the light; induced by light; AspGD sequence represents the veA1 mutant allele    |
| vosA                                         | An1959  | 1,785   | Nuclear protein involved in spore formation and trehalose accumulation; potential transcription-activating domain; mutants have low spore viability; two overlapping transcripts; VosA-VelB form a dimeric complex in hyphae grown in the dark  |
| yA                                           | An6635  | 2,070   | Conidial laccase (p-diphenol oxidase) involved in dark green pigment production of conidium wall; regulated by abaA; transcript accumulates during conidiophore development; mutants produce yellow colonies; upregulated in during hypoxia     |
| gcnE                                         | An3621  | 1,491   | Putative histone acetyltransferase complex component with a role in nucleosome positioning                                                                                                                                                      |
| brIA                                         | An0973  | -2,171  | C2H2 zinc finger transcription factor, fphA- and IreB-dependent light induced regulator of conidiophore development; locus has 2 overlapping transcriptional units called brIA alpha and brIA beta; see 5' brIA micro-ORF, AN0974               |
| conJ                                         | An5015  | -2,844  | Putative conidiation gene; transcript induced by light in in developmentally competent mycelia                                                                                                                                                  |
| ivoB                                         | An0231  | -4,686  | Conidiophore-specific phenol oxidase; mutant conidiophores, metulae and phialides lack pigmentation; ivoB mutants accumulate the substrate N-acetyl-6-hydroxytryptophan (AHT); repressed by light in developmentally competent mycelia          |
| ivoC                                         | An10573 | -1,800  | Putative cytochrome P450                                                                                                                                                                                                                        |
| phiA                                         | An8333  | -4,329  | Protein required for normal phialide development; expression increased in the presence of bafilomycin B1 and concanamycin A; PhiA localizes to conidia and phialides                                                                            |
| rodA                                         | An8803  | -4,943  | Hydrophobin; protein involved in conidium development; required for the formation of outer hydrophobic layer (rodlet layer) of the conidium wall; transcriptionally regulated by BrIA; predicted glycosylphosphatidylinositol (GPI)-anchor      |
| <b>Cell wall organization and biogenesis</b> |         |         |                                                                                                                                                                                                                                                 |
| abnD                                         | An3044  | 2,038   | Putative arabinan endo-1,5-alpha-L-arabinosidase with a predicted role in degradation of pectin; predicted glycosylphosphatidylinositol (GPI)-anchored protein                                                                                  |
| agsB                                         | An3307  | 1,449   | Putative catalytic subunit of the alpha-1,3 glucan synthase complex                                                                                                                                                                             |
| amyG                                         | An3309  | 1,786   | Putative alpha-amylase with a predicted role in starch metabolism                                                                                                                                                                               |
| bgIH                                         | An3903  | 2,319   | Putative beta-glucosidase with a predicted role in polysaccharide degradation                                                                                                                                                                   |
| chiB                                         | An4871  | 1,810   | Class V chitinase; glycoside hydrolase family 18 (GH18) protein with a role in the age-dependent autolysis                                                                                                                                      |
| chsB                                         | An5253  | 1,715   | Class III chitin synthase with a role in chitin biosynthesis; required for normal growth and conidiation; constitutively expressed during vegetative growth, sexual and asexual development                                                     |
| crhC                                         | An0933  | 2,013   | Putative transglycosidase with a predicted role in glucan processing; predicted glycosyl phosphatidylinositol (GPI)-anchor                                                                                                                      |
| mnpA                                         | An10311 | 2,128   | Putative hyphal cell wall mannoprotein; expression is transcriptionally upregulated during sexual development; expression is flbA-, fadA- and veA-dependent; present in the hyphal cell wall, absent from the conidial cell wall                |
| pgaB                                         | An4372  | 2,867   | Protein with polygalacturonase activity, involved in degradation of pectin                                                                                                                                                                      |
| pkcA                                         | An0106  | 1,993   | Protein kinase C; essential gene; required for wild-type level of growth, cell wall integrity and penicillin biosynthesis                                                                                                                       |
| abnC                                         | An8007  | -3,729  | Protein with arabinan endo-1,5-alpha-L-arabinosidase activity, involved in degradation of pectin                                                                                                                                                |
| agnC                                         | An9042  | -1,800  | Putative alpha-1,3-glucanase                                                                                                                                                                                                                    |
| agsA                                         | An5885  | -2,531  | Putative catalytic subunit of the alpha-1,3 glucan synthase complex; locus contains the conserved upstream open reading frame (uORF) AN5885-uORF                                                                                                |
| chsF                                         | An4367  | -1,609  | Putative chitin synthase III with a predicted role in chitin biosynthesis; transcript is induced by nitrate                                                                                                                                     |
| gelC                                         | An3730  | -1,462  | Putative 1,3-beta-transglycosidase with a predicted role in glucan processing                                                                                                                                                                   |
| gelD                                         | An11152 | -5,187  | Putative 1,3-beta-transglycosidase with a predicted role in glucan processing; predicted glycosylphosphatidylinositol (GPI)-anchored protein                                                                                                    |
| pgaC                                         | An8327  | -2,670  | Protein with polygalacturonase activity, involved in degradation of pectin                                                                                                                                                                      |
| glaB                                         | An7402  | -1,800  | Putative glucoamylase with a predicted role in starch metabolism                                                                                                                                                                                |
| xlnB                                         | An9365  | -2,788  | Protein with endo-1,4-beta-xylanase activity, involved in degradation of xylans                                                                                                                                                                 |
| <b>Sec. Metabolism</b>                       |         |         |                                                                                                                                                                                                                                                 |
| aatB                                         | An6775  | 2,276   | Protein involved in penicillin biosynthesis, null produces reduced levels of penicillin; partially redundant with aata                                                                                                                          |
| fbpZ                                         | An10844 | 2,180   | Putative fructose-2,6-bisphosphate 2-phosphatase                                                                                                                                                                                                |
| mdpA                                         | An10021 | 4,330   | Regulatory protein; member of the monodictyphenone secondary metabolite biosynthesis gene cluster; similar to aflatoxin coactivator aflJ and O-methyltransferases; required for biosynthesis of monodictyphenone, a prenyl xanthone precursor   |
| mpkB                                         | An3719  | 1,328   | Null mutant is defective in sexual development, hyphal anastomosis, sterigmatocystin biosynthesis and penicillin biosynthesis; similar to <i>S. cerevisiae</i> FUS3; gene expression is induced during sexual development                       |
| pkcA                                         | An0106  | 1,993   | Protein kinase C; essential gene; required for wild-type level of growth, cell wall integrity and penicillin biosynthesis                                                                                                                       |
| ppoA                                         | An1967  | 1,969   | Putative fatty acid dioxygenase; responsible for the formation of the oxylipin psiB-alpha; PpoA localizes to lipid bodies in Hulle cells and metulae                                                                                            |
| qutC                                         | An1140  | 2,832   | Dehydroshikimate dehydratase, involved in quinic acid utilization                                                                                                                                                                               |
| qutG                                         | An1136  | 2,627   | Putative myo-inositol-1(or 4)-monophosphatase with a predicted role in phospholipid metabolism; transcript inducible by quinate                                                                                                                 |
| rsmA                                         | An4562  | 1,970   | Basic leucine zipper (bZIP) type transcription factor involved in regulation of secondary metabolism                                                                                                                                            |
| tpsA                                         | An5523  | 2,022   | Putative alpha,alpha-trehalose-phosphate synthase (UDP-forming) with a role in trehalose biosynthesis; transcriptionally induced during spore germination and exponential growth; required for viability of conidia during prolonged storage    |
| treA                                         | An9340  | 1,849   | Alpha,alpha-trehalase with a role in trehalose hydrolysis; localized to the conidial cell wall; expression upregulated after exposure to farnesol                                                                                               |
| vosA                                         | An1959  | 1,785   | Nuclear protein involved in spore formation and trehalose accumulation; potential transcription-activating domain; mutants have low spore viability; two overlapping transcripts; VosA-VelB form a dimeric complex in hyphae grown in the dark  |
| CYP620E1                                     | An1601  | 1,433   | Putative cytochrome P450; O-methylsterigmatocystin oxidoreductase with a predicted role in sterigmatocystin/aflatoxin biosynthesis                                                                                                              |
| apdA                                         | An8412  | -3,959  | Putative hybrid polyketide synthase-nonribosomal peptide synthase (PKS-NRPS); aspyridone synthetase; member of the aspyridone (apd) gene cluster                                                                                                |

## Supplementary table 3

|                                                          |         |        |                                                                                                                                                                                                                                                 |
|----------------------------------------------------------|---------|--------|-------------------------------------------------------------------------------------------------------------------------------------------------------------------------------------------------------------------------------------------------|
| bgID                                                     | An7915  | -3,864 | Putative glucosidase; member of the F9775 secondary metabolite gene cluster                                                                                                                                                                     |
| bgJI                                                     | An7865  | -2,055 | Putative beta-glucosidase                                                                                                                                                                                                                       |
| cipB                                                     | An7895  | -2,694 | Putative oxidoreductase; contains Zn-dependent alcohol dehydrogenase domain; protein expressed at increased levels during osmoadaptation                                                                                                        |
| <b>Siderophore synthesis and transport</b>               |         |        |                                                                                                                                                                                                                                                 |
| amc-1                                                    | An8881  | 1,840  | Predicted siderophore transporter; member of the mitochondrial carrier family                                                                                                                                                                   |
| sreA                                                     | An0176  | 1,682  | Predicted GATA transcription factor involved in iron uptake, acts as a repressor of siderophore biosynthesis under high-iron conditions; mutants accumulate increased amounts of iron                                                           |
| sidA                                                     | An5823  | -2,555 | L-ornithine N5-monoxygenase; involved in siderophore biosynthesis; null mutant inviable unless medium is supplemented with siderophores                                                                                                         |
| <b>Hyphal morphogenesis</b>                              |         |        |                                                                                                                                                                                                                                                 |
| abpA                                                     | An12237 | 1,490  | Putative actin-binding protein of the cortical actin patches involved in endocytosis                                                                                                                                                            |
| ahbB                                                     | An10647 | 1,783  | Putative cytochrome P450 protein; involved in hyphal branching; mutant branches excessively                                                                                                                                                     |
| ampB                                                     | An8831  | 1,999  | Has domain(s) with predicted cytoplasm localization                                                                                                                                                                                             |
| bemA                                                     | An7030  | 1,245  | Polarisome component required for conidiation and vacuolar fusion; has similarity to <i>Saccharomyces cerevisiae</i> Bem1p                                                                                                                      |
| didB                                                     | An9396  | 1,719  | Protein involved in the vacuolar protein sorting via the multivesicular body pathway                                                                                                                                                            |
| mipA                                                     | An0676  | 1,579  | Gamma-tubulin, essential component of the spindle pole body, required for microtubule function                                                                                                                                                  |
| myoA                                                     | An1558  | 1,392  | Putative myosin I; required for secretion and polarized growth                                                                                                                                                                                  |
| pilA                                                     | An5217  | 2,499  | Protein with similarity to sphingolipid long chain base-responsive protein Pil1; putative conserved eisosome component; expression upregulated after farnesol exposure; present at the conidial periphery and in punctate structures in mycelia |
| pkcA                                                     | An0106  | 1,993  | Protein kinase C; essential gene; required for wild-type level of growth, cell wall integrity and penicillin biosynthesis                                                                                                                       |
| schA                                                     | An4238  | 1,888  | Protein kinase involved in cAMP-dependent signaling during conidial germination; has overlapping functions with PkaA                                                                                                                            |
| ptkA                                                     | An8865  | 1,451  | Putative cyclin-dependent kinase; PITALRE motif; similarity to <i>S. pombe</i> Cdc9; constitutively expressed throughout development; localized to nucleus but nuclear localization is lost during mitosis                                      |
| racA                                                     | An4743  | 1,338  | Rho GTPase protein required for normal colony growth and conidiophore development; synthetically lethal with modA null                                                                                                                          |
| rmtA                                                     | An10526 | 1,650  | Arginine methyltransferase                                                                                                                                                                                                                      |
| sgdA                                                     | An0359  | 1,462  | Putative eIF3b subunit of translation initiation factor 3 (eIF3); required for conidial germination                                                                                                                                             |
| sgdE                                                     | An6010  | 1,641  | Hsp70-family protein; required for conidial germination; protein expressed at increased levels during osmoadaptation                                                                                                                            |
| spaA                                                     | An3815  | 1,536  | Protein with a role in establishment of cell polarity; ortholog of <i>S. cerevisiae</i> Spa2p                                                                                                                                                   |
| srgA                                                     | An6974  | 1,472  | Putative Rab-like GTPase                                                                                                                                                                                                                        |
| srgH                                                     | An3842  | 1,271  | Putative GTPase required for early endosome trafficking; recruits prototypical Rab5 effectors Vps19, Vps45 and Vps34 and plays the major role in endocytic degradation; involved in vacuolar biogenesis; synthetically lethal with srgG/rabA    |
| ssoA                                                     | An3416  | 1,778  | Similar to syntaxin proteins; SsoA-GFP localizes to the plasma membrane and to the hyphal tip                                                                                                                                                   |
| surG                                                     | An4615  | 2,315  | Transmembrane domain-containing protein with homology to <i>S. cerevisiae</i> Sur7p; SurG-GFP localizes perinuclearly and to patches in the periphery of spores and to the vacuole and endosomes of hyphae (                                    |
| swoC                                                     | An8851  | 2,303  | Predicted pseudouridylylase, involved in establishment of cell polarity; mutants show defects in anisotropic growth, endocytosis, nuclear distribution and compartmentation; transcript upregulated in response to camptothecin (               |
| swof                                                     | An8339  | 1,272  | Putative glycopeptide N-tetradecanoyltransferase involved in control of polar growth; predicted role in protein, peptide, and amino acid metabolism                                                                                             |
| swoM                                                     | An6037  | 1,472  | Putative glucose-6-phosphate isomerase with a predicted role in gluconeogenesis and glycolysis; mutant defective in hyphal polarity and conidiation                                                                                             |
| vps32                                                    | An4240  | 1,871  | Protein with homology to <i>Saccharomyces cerevisiae</i> Snf7p/Vps32p; physically interacts with PaIA; essential for pH signaling; mutants exhibit fragmented vacuoles; required for membrane transport to vacuoles                             |
| chiA                                                     | An8241  | -1,493 | Endochitinase with a predicted role in chitin hydrolysis; glycosylphosphatidylinositol (GPI) anchored protein; modified by O-linked glycosylation; localized to germination sites, hyphal branch points and regions of polarized growth         |
| <b>Electron transference and energy production</b>       |         |        |                                                                                                                                                                                                                                                 |
| ahbB                                                     | An10647 | 1,793  | Putative cytochrome P450 protein; involved in hyphal branching; mutant branches excessively                                                                                                                                                     |
| ndiF                                                     | An1094  | 3,192  | Putative mitochondrial NADH dehydrogenase (ubiquinone) with a predicted role in energy metabolism                                                                                                                                               |
| CYP505A8                                                 | An6835  | 3,565  | Putative cytochrome P450; expression upregulated after exposure to farnesol                                                                                                                                                                     |
| CYP5073A1                                                | An8141  | 3,080  | Putative cytochrome P450                                                                                                                                                                                                                        |
| CYP539A4P                                                | An5478  | 2,461  | Putative cytochrome P450; possibly a pseudogene                                                                                                                                                                                                 |
| CYP620E1                                                 | An1601  | 1,433  | Putative cytochrome P450; O-methylsterigmatocystin oxidoreductase with a predicted role in sterigmatocystin/afatoxin biosynthesis                                                                                                               |
| CYP646A1                                                 | An2596  | 1,399  | Putative cytochrome P450                                                                                                                                                                                                                        |
| CYP659A1                                                 | An3349  | 1,513  | Putative cytochrome P450                                                                                                                                                                                                                        |
| CYP663A1                                                 | An7399  | 1,633  | Putative cytochrome P450                                                                                                                                                                                                                        |
| CYP671A1                                                 | An8338  | 1,674  | Putative cytochrome P450                                                                                                                                                                                                                        |
| CYP5128A1                                                | An1703  | -1,483 | Putative cytochrome P450                                                                                                                                                                                                                        |
| CYP52G1                                                  | An6057  | -2,658 | Putative cytochrome P450                                                                                                                                                                                                                        |
| CYP537B1                                                 | An8905  | -1,903 | Putative cytochrome P450                                                                                                                                                                                                                        |
| CYP584E1                                                 | An9384  | -1,332 | Putative cytochrome P450 alkane hydroxylase                                                                                                                                                                                                     |
| CYP631B1                                                 | An3225  | -2,814 | Putative cytochrome P450                                                                                                                                                                                                                        |
| <b>Nucleic acid assembly, organization and integrity</b> |         |        |                                                                                                                                                                                                                                                 |
| H4.2                                                     | An2426  | 1,752  | Histone H4.2, core histone protein; nearly identical to histone H4.1                                                                                                                                                                            |
| bimG                                                     | An0410  | 1,621  | Essential protein phosphatase required for the completion of anaphase; uORF encoded in the upstream leader sequence                                                                                                                             |
| cgrA                                                     | An11145 | 2,732  | Functional ortholog of <i>S. cerevisiae</i> CGR1; nucleolar protein with a predicted role in ribosome biogenesis and rRNA processing                                                                                                            |
| dclA                                                     | An0119  | 2,333  | Putative Dicer protein                                                                                                                                                                                                                          |
| ddbA                                                     | An0596  | 1,349  | Putative DNA damage binding protein involved in the DNA damage response; homolog of human DDB1                                                                                                                                                  |
| gcnE                                                     | An3621  | 1,491  | Putative histone acetyltransferase complex component with a role in nucleosome positioning                                                                                                                                                      |
| mshA                                                     | An1708  | 1,465  | Putative MutS homolog with a predicted role in DNA mismatch repair; transcript upregulated in response to camptothecin                                                                                                                          |
| mtr4                                                     | An4412  | 2,193  | Putative nuclear exosomal DEAD-box family RNA helicase; ortholog of <i>S. cerevisiae</i> Mtr4p; expression reduced after exposure to farnesol                                                                                                   |
| nkuB                                                     | An4552  | 1,368  | Ortholog of Ku80; 80 kDa subunit of Ku70/Ku80 complex involved in non-homologous double-stranded break repair                                                                                                                                   |
| prp8                                                     | An4523  | 1,299  | Putative component of the catalytic core of the spliceosome involved in pre-mRNA splicing; intein-containing protein; inteins are protein intervening sequences that can self-excite through protein splicing                                   |
| prpA                                                     | An3129  | 2,735  | Putative protein disulfide isomerase; pdiB mRNA levels increase in the presence of farnesol                                                                                                                                                     |

## Supplementary table 3

|                                   |         |        |                                                                                                                                                                                                                                           |
|-----------------------------------|---------|--------|-------------------------------------------------------------------------------------------------------------------------------------------------------------------------------------------------------------------------------------------|
| rrp5                              | An2147  | 2,385  | Putative ribosomal RNA processing protein; ortholog of <i>S. cerevisiae</i> Rrp5p; expression reduced after exposure to farnesol                                                                                                          |
| rrpB                              | An4790  | 1,878  | Putative RNA-directed RNA polymerase                                                                                                                                                                                                      |
| spb4                              | An3176  | 2,692  | ATP-dependent rRNA helicase                                                                                                                                                                                                               |
| top1                              | An0253  | 1,839  | Putative DNA topoisomerase I; transcript upregulated in response to camptothecin                                                                                                                                                          |
| uvsC                              | An1237  | 1,37   | Protein with homology to <i>Saccharomyces cerevisiae</i> Rad51p and to bacterial RecA; involved in the DNA damage response; mutants are sensitive to DNA double-strand breaks and have defects in homologous recombination                |
| uvsD                              | An5165  | 2,473  | Protein involved in G2/M transition DNA damage checkpoint                                                                                                                                                                                 |
| rsdA                              | An1519  | 2,511  | Putative Argonaute protein involved in inverted repeat transgene (IRT)-induced RNA silencing                                                                                                                                              |
| <b>GPase, ATPase and channels</b> |         |        |                                                                                                                                                                                                                                           |
| arlA                              | An5912  | 1,757  | Predicted ADP ribosylation factor GTPase                                                                                                                                                                                                  |
| BEST1                             | An2251  | 1,943  | Putative bestrophin-like protein; anion channel capable of transporting a wide range of organic anions across the plasma membrane; currents activated by elevated cytosolic Ca <sup>2+</sup>                                              |
| enaB                              | An1628  | 2,712  | Putative membrane ATPase with a predicted role in energy metabolism                                                                                                                                                                       |
| mid1                              | An8842  | 1,341  | Putative calcium channel; predicted glycosylphosphatidylinositol (GPI)-anchored protein                                                                                                                                                   |
| pmcB                              | An4920  | 1,832  | Putative calcium-transporting mitochondrial ATPase involved in calcium homeostasis                                                                                                                                                        |
| racA                              | An4743  | 1,338  | Rho GTPase protein required for normal colony growth and conidiophore development; synthetically lethal with modA null                                                                                                                    |
| trkB                              | An8029  | 2,473  | Putative plasma membrane high affinity K <sup>+</sup> transporter                                                                                                                                                                         |
| trkC                              | An10136 | 1,478  | Has domain(s) with predicted cation transmembrane transporter activity and role in cation transport, transmembrane transport (                                                                                                            |
| uapC                              | An6730  | 2,214  | Low-to-moderate capacity, broad specificity purine permease; putative paralog of UapA; localized to the cell periphery, relocates to vacuoles in the presence of ammonium                                                                 |
| vcxA                              | An0471  | 2,045  | Putative vacuolar H <sup>+</sup> /Ca <sup>2+</sup> exchanger                                                                                                                                                                              |
| atrA                              | An8928  | -4,309 | Putative vacuolar membrane ATP-binding cassette (ABC) transporter with a predicted role in multidrug resistance; transcript induced by the fungicide imazalil                                                                             |
| <b>Cell cycle</b>                 |         |        |                                                                                                                                                                                                                                           |
| bimG                              | An0410  | 1,621  | Essential protein phosphatase required for the completion of anaphase; uORF encoded in the upstream leader sequence                                                                                                                       |
| pinA                              | An6145  | 1,408  | Essential phospho-Ser/Thr-directed peptidyl prolyl-isomerase involved in cell cycle progression; regulates NimA function                                                                                                                  |
| ptkA                              | An8865  | 1,451  | Putative cyclin-dependent kinase; PITALRE motif; similarity to <i>S. pombe</i> Cdc9; constitutively expressed throughout development; localized to nucleus but nuclear localization is lost during mitosis                                |
| <b>Cell death</b>                 |         |        |                                                                                                                                                                                                                                           |
| aifA                              | An9103  | 1,988  | Putative apoptosis-inducing factor (AIF)-like mitochondrial oxidoreductase; mutants display decreased survival in the presence of farnesol or menadione, decreased electron transport; expression upregulated after exposure to farnesol  |
| atfA                              | An2911  | 1,946  | Basic-region leucine zipper transcription factor; plays a role in the response of conidia to stress; expression upregulated after exposure to farnesol                                                                                    |
| casA                              | An5712  | 2,157  | Putative metacaspase                                                                                                                                                                                                                      |
| cdc37                             | An2051  | 1,350  | Putative Hsp90p co-chaperone linked to a regulatory pathway that controls autophagy; protein repressed by and starvation- and rapamycin-induced autophagy                                                                                 |
| chIB                              | An4871  | 1,810  | Class V chitinase; glycoside hydrolase family 18 (GH18) protein with a role in the age-dependent autolysis                                                                                                                                |
| pho8                              | An10563 | 1,742  | Putative vacuolar alkaline phosphatase with a predicted role in the autophagy pathway; induced by carbon starvation-induced autophagy                                                                                                     |
| prpA                              | An3129  | 2,735  | Putative protein disulfide isomerase; pdiB mRNA levels increase in the presence of farnesol                                                                                                                                               |
| chiA                              | An8241  | -1,493 | Endochitinase with a predicted role in chitin hydrolysis; glycosylphosphatidylinositol (GPI) anchored protein; modified by O-linked glycosylation; localized to germination sites, hyphal branch points and regions of polarized growth   |
| pepJ                              | An7962  | -1,988 | Extracellular deuterolysin-type metallo-proteinase                                                                                                                                                                                        |
| <b>Nuclear transport</b>          |         |        |                                                                                                                                                                                                                                           |
| kap1                              | An5717  | 1,443  | Non-essential karyopherin family protein; required for normal hyphal growth and conidial development; predicted to contain five HEAT (huntingtin-elongation-A subunit-TOR) motifs                                                         |
| nic96                             | An6980  | 1,666  | Component of the nuclear pore complex                                                                                                                                                                                                     |
| nup2                              | An5485  | 1,690  | Putative nuclear pore complex protein with low homology to <i>Saccharomyces cerevisiae</i> Nup2p                                                                                                                                          |
| nup57                             | An1064  | 1,773  | Putative nuclear pore complex protein with homology to <i>Saccharomyces cerevisiae</i> Nup57p                                                                                                                                             |
| nup84                             | An1190  | 1,428  | Putative nuclear pore complex protein with homology to <i>Saccharomyces cerevisiae</i> Nup84p; synthetically lethal with ndc1 mutation                                                                                                    |
| ran                               | An5483  | 1,437  | Putative Ran GTPase, GTP binding protein; protein abundance decreased by menadione stress; palA-dependent expression independent of pH                                                                                                    |
| <b>GPCR and het. G proteins</b>   |         |        |                                                                                                                                                                                                                                           |
| fadA                              | An0651  | 1,461  | Alpha subunit of a heterotrimeric G protein composed of FadA, SfaD, GpgA and involved in regulation of proliferation and conidiophore development; mutant produces increased amounts of extracellular proteinase during carbon starvation |
| gpgA                              | An2742  | 1,348  | Gamma subunit of a heterotrimeric G protein composed of FadA, SfaD, GpgA and involved in regulation of proliferation and development; mutants show abnormal conidiation and are defective in formation of cleistothecia                   |
| gprC                              | An3765  | 1,470  | Putative G-protein coupled receptor                                                                                                                                                                                                       |
| gprE                              | An9199  | 1,311  | Putative G-protein coupled receptor                                                                                                                                                                                                       |
| gprI                              | An8348  | 3,937  | Putative G-protein coupled receptor                                                                                                                                                                                                       |
| gprJ                              | An5720  | 2,955  | Putative G-protein coupled receptor; has a PQ-loop repeat                                                                                                                                                                                 |
| <b>Sexual development</b>         |         |        |                                                                                                                                                                                                                                           |
| cpcA                              | An3675  | 2,859  | Transcription factor of the Gcn4p c-Jun-like transcriptional activator family; involved in cross-pathway control of amino acid biosynthesis in response to amino acid starvation; role in sexual development; contains two 5' uORFs       |
| esdC                              | An9121  | 2,742  | Protein with a glycogen binding domain involved in sexual development; regulated by VeA and FlbA                                                                                                                                          |
| fhpA                              | An4521  | 2,971  | Forkhead domain protein with a possible role in sexual development                                                                                                                                                                        |
| fphA                              | An9008  | 1,475  | Phytochrome photoreceptor, a red-light sensor that represses sexual development under red light; binds chromophore biliverdin; interacts with VeA and LreB                                                                                |
| lreB                              | An3607  | 1,901  | Putative zinc-finger transcription factor involved in blue-light responsive differentiation; interacts with VeA, FphA, and LreA; similar to <i>N. crassa</i> blue-light-sensing component WC-2                                            |
| mnpA                              | An10311 | 2,128  | Putative hyphal cell wall mannoprotein; expression is transcriptionally upregulated during sexual development; expression is flbA-, fadA- and veA-dependent; present in the hyphal cell wall, absent from the conidial cell wall          |
| mpkB                              | An3719  | 1,328  | Null mutant is defective in sexual development, hyphal anastomosis, strigimotocystin biosynthesis and penicillin biosynthesis; similar to <i>S. cerevisiae</i> FUS3; gene expression is induced during sexual development                 |
| nsdC                              | An4263  | 1,3    | C2H2 zinc finger transcription factor; required for sexual development; vegetative growth reduced and asexual development derepressed in null mutant; mRNA increased during sexual development and under hypoxic conditions               |
| pho80                             | An5156  | 1,587  | Pho80-like cyclin involved in regulation of development and phosphate homeostasis; interacts with the cyclin-dependent kinase PhoA                                                                                                        |

## Supplementary table 3

|                                            |         |        |                                                                                                                                                                                                                                                |
|--------------------------------------------|---------|--------|------------------------------------------------------------------------------------------------------------------------------------------------------------------------------------------------------------------------------------------------|
| ppgA                                       | An5791  | 1,969  | Predicted pheromone precursor; encodes two copies of a peptide similar to <i>S. cerevisiae</i> alpha-factor, which is subject to proteolytic processing                                                                                        |
| ppoA                                       | An1967  | 1,969  | Putative fatty acid dioxygenase; responsible for the formation of the oxylipin psiB-alpha; PpoA localizes to lipid bodies in Hulle cells and metulae                                                                                           |
| rosA                                       | An5170  | 1,714  | Putative Zn(II)2Cys6 transcription factor; negative regulator of sexual development                                                                                                                                                            |
| veA                                        | An1052  | 1,386  | Protein involved in light-sensitive control of differentiation and secondary metabolism; localizes to the nucleus in dark and to both nucleus and cytoplasm in the light; induced by light; AspGD sequence represents the veA1 mutant allele   |
| vosA                                       | An1959  | 1,785  | Nuclear protein involved in spore formation and trehalose accumulation; potential transcription-activating domain; mutants have low spore viability; two overlapping transcripts; VosA-VelB form a dimeric complex in hyphae grown in the dark |
| fhbA                                       | An7169  | -2,103 | NirA-dependent flavohemoprotein; required for nitrate and nitrite reductase enzyme activity, regulates sexual development; menadione stress-induced protein; induced by nitrate; palA-dependent, pH-independent expression                     |
| <b>Fatty acid metabolism</b>               |         |        |                                                                                                                                                                                                                                                |
| accA                                       | An6126  | 1,808  | Putative acetyl-CoA carboxylase with a predicted role in cytosolic fatty acid formation                                                                                                                                                        |
| bioF                                       | An6645  | 1,403  | Putative 8-amino-7-oxononanoate synthase with a predicted role in Coenzyme A and pantothenate biosynthesis                                                                                                                                     |
| choC                                       | An1376  | 1,338  | Putative methylene-fatty-acyl-phospholipid synthase with a predicted role in phospholipid metabolism                                                                                                                                           |
| faaA                                       | An6014  | 1,639  | Putative long-chain-fatty-acid-CoA ligase with a predicted role in fatty acid metabolism                                                                                                                                                       |
| fasA                                       | An9407  | 2,539  | Fatty acid synthase, alpha subunit; multifunctional enzyme with a predicted role in cytosolic fatty acid biosynthesis                                                                                                                          |
| fasB                                       | An9408  | 2,033  | Fatty acid synthase, beta subunit; multifunctional enzyme with a predicted role in cytosolic fatty acid formation                                                                                                                              |
| pldA                                       | An6712  | 2,489  | Putative phospholipase D; expression upregulated after exposure to farnesol                                                                                                                                                                    |
| ppoA                                       | An1967  | 1,969  | Putative fatty acid dioxygenase; responsible for the formation of the oxylipin psiB-alpha; PpoA localizes to lipid bodies in Hulle cells and metulae                                                                                           |
| sdeA                                       | An6731  | 2,117  | Putative delta-9-stearic acid desaturase; converts palmitic acid and stearic acid to palmitoleic acid and oleic acid; null mutant has increased fatty acid content; synthetically lethal with sdeB mutation; expression reduced by farnesol    |
| <b>Oxidative and other stress response</b> |         |        |                                                                                                                                                                                                                                                |
| aifA                                       | An9103  | 1,988  | Putative apoptosis-inducing factor (AIF)-like mitochondrial oxidoreductase; mutants display decreased survival in the presence of farnesol or menadione, decreased electron transport; expression upregulated after exposure to farnesol       |
| atfA                                       | An2911  | 1,946  | Basic-region leucine zipper transcription factor; plays a role in the response of conidia to stress; expression upregulated after exposure to farnesol                                                                                         |
| awh11                                      | An3725  | 4,076  | Developmentally regulated protein with similarity to <i>Candida albicans</i> Wh11p; transcription is repressed by StuA; expression upregulated after exposure to farnesol                                                                      |
| bop1                                       | An1367  | 2,342  | Putative WD40 repeat nucleolar protein; ortholog of <i>S. cerevisiae</i> Erb1p which has role in rRNA processing and ribosomal large subunit biogenesis; expression reduced after exposure to farnesol                                         |
| catA                                       | An8637  | 3,172  | <i>Conidia</i> -specific catalase; predicted role in gluconic acid and gluconate metabolism                                                                                                                                                    |
| catC                                       | An5918  | 1,888  | Putative catalase with a predicted role in gluconic acid and gluconate metabolism                                                                                                                                                              |
| ccp1                                       | An10220 | 1,638  | Putative cytochrome c peroxidase; intracellular; protein abundance decreased by menadione stress                                                                                                                                               |
| codA                                       | An1429  | 2,420  | Putative choline oxidase; intracellular, menadione stress-induced protein                                                                                                                                                                      |
| cpeA                                       | An7388  | 2,768  | Putative catalase-peroxidase with a predicted role in gluconic acid and gluconate metabolism; protein also identified as laccase II which is expressed during sexual development                                                               |
| eifA                                       | An9304  | 2,043  | Glutathione S-transferase; upregulated in <i>A. oryzae</i> and <i>A. nidulans</i> under hypoxic growth conditions                                                                                                                              |
| gpxA                                       | An2846  | 1,376  | Putative glutathione peroxidase with a predicted role in glutathione biosynthesis                                                                                                                                                              |
| gstB                                       | An6024  | 2,285  | Protein with glutathione S-transferase and glutathione peroxidase activities; intracellular, menadione stress-induced protein                                                                                                                  |
| halA                                       | An8830  | 2,480  | Predicted protein kinase involved in halotolerance; suppressor of molybdate sensitivity of pacC mutant                                                                                                                                         |
| hogA                                       | An1017  | 2,128  | Putative mitogen-activated protein kinase (MAPK) involved in osmotic stress response; highly up-regulated under osmotic stress conditions; required for sexual development and sporulation                                                     |
| cyp4                                       | An9420  | 1,506  | Putative peptidyl-prolyl cis-trans isomerase H (PPIase)                                                                                                                                                                                        |
| cyp7                                       | An4583  | 1,704  | Putative peptidyl-prolyl cis-trans isomerase D (PPIase); cyclophilin family member; protein abundance decreased by menadione stress; transcript levels increase during the unfolded-protein response (UPR) and in response to camptothecin     |
| mid1                                       | An8842  | 1,341  | Putative calcium channel; predicted glycosylphosphatidylinositol (GPI)-anchored protein                                                                                                                                                        |
| mpkB                                       | An3719  | 1,328  | Null mutant is defective in sexual development, hyphal anastomosis, sterigmatocystin biosynthesis and penicillin biosynthesis; similar to <i>S. cerevisiae</i> FUS3; gene expression is induced during sexual development                      |
| msrA                                       | An10562 | 1,535  | Putative methionine sulfoxide reductase with a predicted role in the reduction of methionine sulfoxide to methionine                                                                                                                           |
| msrB                                       | An1932  | 2,231  | Putative methionine sulfoxide reductase with a predicted role in the reduction of methionine sulfoxide to methionine                                                                                                                           |
| mtr4                                       | An4412  | 2,193  | Putative nuclear exosomal DEAD-box family RNA helicase; ortholog of <i>S. cerevisiae</i> Mtr4p; expression reduced after exposure to farnesol                                                                                                  |
| napA                                       | An7513  | 1,746  | Homologous to bZIP family transcription factor human AP-1 and <i>Aspergillus nidulans</i> AtfA                                                                                                                                                 |
| nop10                                      | An8254  | 2,104  | Putative snoRNP complex protein; ortholog of <i>S. cerevisiae</i> Nop10p; expression reduced after exposure to farnesol                                                                                                                        |
| nop58                                      | An3167  | 2,954  | Putative ribosome biogenesis protein; ortholog of <i>S. cerevisiae</i> Nop58p; expression reduced after exposure to farnesol                                                                                                                   |
| pbsA                                       | An0931  | 1,563  | Mitogen activated protein kinase kinase (MAPKK) of the HOG signaling pathway that regulates osmotic stress response                                                                                                                            |
| pgmA                                       | An3059  | 2,942  | Putative phosphoglycerate mutase with a predicted role in gluconeogenesis and glycolysis; expression upregulated after exposure to farnesol                                                                                                    |
| pkcA                                       | An0106  | 1,993  | Protein kinase C; essential gene; required for wild-type level of growth, cell wall integrity and penicillin biosynthesis                                                                                                                      |
| ptpA                                       | An6982  | 2,298  | Putative phosphotyrosine-specific protein phosphatase of the HOG signaling pathway that regulates osmotic stress response                                                                                                                      |
| ran                                        | An5483  | 1,437  | Putative Ran GTPase, GTP binding protein; protein abundance decreased by menadione stress; palA-dependent expression independent of pH                                                                                                         |
| rcnA                                       | An6249  | 2,525  | Putative calcineurin binding protein, calcipressin                                                                                                                                                                                             |
| rmtA                                       | An10526 | 1,650  | Arginine methyltransferase                                                                                                                                                                                                                     |
| sgdE                                       | An6010  | 1,641  | Hsp70-family protein; required for conidial germination; protein expressed at increased levels during osmoadaptation                                                                                                                           |
| shoA                                       | An7698  | 1,657  | Putative transmembrane osmosensor, equivalent to <i>S. cerevisiae</i> Sho1p which activates MAP kinase-dependent high-osmolarity glycerol response pathway                                                                                     |
| shtA                                       | An2919  | 2,338  | C2H2 zinc-finger transcription factor involved in cation homeostasis; involved in response to abiotic stress; transcript upregulated in response to camptothecin; necessary for growth on pH 8 medium                                          |
| srrA                                       | An3688  | 2,994  | Response regulator, part of a two-component signal transduction system involved in control of stress response and conidiation; transcript induced by hydrogen peroxide                                                                         |
| srrC                                       | An4134  | 1,632  | Putative kinase response regulator of a two-component phosphorelay system                                                                                                                                                                      |
| ypdA                                       | An2005  | 1,777  | Histidine-containing phosphotransfer protein, part of a two-component signal transducer involved in the HOG signaling pathway that regulates osmotic stress response                                                                           |
| CYP505A8                                   | An6835  | 3,565  | Putative cytochrome P450; expression upregulated after exposure to farnesol                                                                                                                                                                    |
| atrA                                       | An8928  | -4,309 | Putative plasma membrane ATP-binding cassette (ABC) transporter with a predicted role in multidrug resistance; transcript induced by the fungicide imazalil                                                                                    |
| cipB                                       | An7895  | -2,694 | Putative oxidoreductase; contains Zn-dependent alcohol dehydrogenase domain; protein expressed at increased levels during osmoadaptation                                                                                                       |
| fhbA                                       | An7169  | -2,103 | NirA-dependent flavohemoprotein; required for nitrate and nitrite reductase enzyme activity, regulates sexual development; menadione stress-induced protein; induced by nitrate; palA-dependent, pH-independent expression                     |
| <b>Primary C and N metabolism</b>          |         |        |                                                                                                                                                                                                                                                |
| accA                                       | An6126  | 1,808  | Putative acetyl-CoA carboxylase with a predicted role in cytosolic fatty acid formation                                                                                                                                                        |
| aciA                                       | An2435  | 1,776  | Putative ATP citrate synthase with a predicted role in TCA intermediate metabolism; transcript downregulated upon shift from glucose to ethanol and after exposure to farnesol                                                                 |
| aciB                                       | An2436  | 2,316  | Putative ATP citrate synthase with a predicted role in TCA intermediate metabolism; transcript downregulated upon shift from glucose to ethanol and after exposure to farnesol                                                                 |
| acuE                                       | An6653  | 2,049  | Malate synthase, required for utilization of acetate as carbon source; transcription induction by acetate mediated by FacB; carbon catabolite repression mediated by CreA; transcription induction by long-chain fatty acids mediated by FarA  |
| acuF                                       | An1918  | 3,365  | Putative phosphoenolpyruvate carboxylase with a predicted role in gluconeogenesis and glycolysis; transcriptionally induced by acetate and after exposure to farnesol                                                                          |

## Supplementary table 3

|          |         |        |                                                                                                                                                                                                                                                  |
|----------|---------|--------|--------------------------------------------------------------------------------------------------------------------------------------------------------------------------------------------------------------------------------------------------|
| acuG     | An5604  | 2,388  | Putative fructose-bisphosphatase with a predicted role in gluconeogenesis and glycolysis; intracellular; protein abundance decreased by menadione stress; expression upregulated after exposure to farnesol                                      |
| agaA     | An2901  | 2,037  | Arginase, catalyzes hydrolysis of arginine to urea and ornithine in the arginine catabolic pathway; induced by arginine and repressed by ammonium                                                                                                |
| alcU     | An8982  | 3,93   | Predicted protein of unknown function; member of the alc gene cluster                                                                                                                                                                            |
| arcA     | An0202  | 1,766  | Putative zinc-finger transcription factor of the Zn(II)2Cys6 type involved in regulation of arginine catabolism; acts as a transcriptional activator of arginase (agaA) and ornithine transaminase (otaA) genes                                  |
| areA     | An8667  | 1,462  | Wide-domain GATA-type transcription factor; mediates nitrogen metabolite repression; transcript induced by nitrogen starvation and degraded in response to ammonium or glutamine; AreA accumulates in the nucleus during nitrogen starvation     |
| areG     | An0354  | 2,539  | Putative 3-deoxy-D-arabino-heptulosonate 7-phosphate synthase with a predicted role in aromatic amino acid family biosynthesis; protein expressed at increased levels in a hapX mutant versus wild-type; feedback-inhibited by phenylalanine     |
| aromA    | An0708  | 1,972  | Putative pentafunctional AROM polypeptide with 3-dehydroquinate synthase, 3-dehydroquinate dehydratase, shikimate 5-dehydrogenase, shikimate kinase, and EPS5 synthase activities; has a predicted role in aromatic amino acid biosynthesis      |
| azgA     | An8534  | 2,576  | Purine transporter with high affinity for hypoxanthine and adenine; takes up purines for nucleotide salvage and as nitrogen sources; induced by uric acid; regulated by UaY and AreA                                                             |
| carC     | An8793  | 1,504  | Putative succinate dehydrogenase (ubiquinone) with a predicted role in the TCA cycle; paA-dependent expression independent of pH                                                                                                                 |
| cpa      | An2243  | 1,828  | Putative carbamoyl-phosphate synthase or aspartate carbamoyltransferase with a predicted role in arginine or pyrimidine metabolism                                                                                                               |
| cpcA     | An3675  | 2,859  | Transcription factor of the Gcn4p c-Jun-like transcriptional activator family; involved in cross-pathway control of amino acid biosynthesis in response to amino acid starvation; role in sexual development; contains two 5' uORFs              |
| creA     | An6195  | 1,619  | Transcriptional regulator that mediates carbon catabolite repression; mutants display increased extracellular protease activity                                                                                                                  |
| dfgC     | An0393  | 1,373  | Putative endo-mannanase GH76 family protein; predicted type I transmembrane protein                                                                                                                                                              |
| facB     | An0689  | 1,464  | Transcription factor containing a Zn(II)2-Cys6 binuclear DNA-binding cluster domain; activates transcription of genes required for acetate utilization; active form is likely a dimer formed via leucine zipper-like repeats; induced by acetate |
| facC     | An1059  | 1,403  | Carnitine acetyltransferase, required for utilization of acetate as carbon source; transcriptional induction by acetate is mediated by FacB; carbon catabolite repression is mediated by CreA; predicted role in the carnitine shuttle           |
| fbaA     | An2875  | 1,94   | Putative fructose-bisphosphate aldolase with a predicted role in gluconeogenesis and glycolysis; intracellular, menadione stress-induced protein; paA-dependent expression independent of pH                                                     |
| fbpZ     | An10844 | 2,18   | Putative fructose-2,6-bisphosphate 2-phosphatase                                                                                                                                                                                                 |
| gfdA     | An0351  | 1,32   | Putative NAD+ dependent glycerol-3-phosphate dehydrogenase with a predicted role in glycerol metabolism                                                                                                                                          |
| gfdB     | An6792  | 2,856  | Putative NAD+ dependent glycerol 3-phosphate dehydrogenase with a predicted role in glycerol metabolism                                                                                                                                          |
| gldB     | An5563  | 1,654  | Putative dehydrogenase with a predicted role in carbohydrate metabolism; NADP+-dependent glycerol dehydrogenase; required for osmotolerance; transcript downregulated by growth in glycerol; expression upregulated after exposure to farnesol   |
| glikA    | An8689  | 1,418  | Putative glucokinase; ORF that was absent from the original release of version 4 of the A. nidulans annotation, but present in a previous version                                                                                                |
| gmtA     | An8848  | 1,328  | Putative GDP-mannose transporter                                                                                                                                                                                                                 |
| gsdA     | An2981  | 1,576  | Putative glucose 6-phosphate 1-dehydrogenase with a predicted role in the pentose-phosphate shunt; intracellular, menadione stress-induced protein; transcript downregulated by growth in ethanol                                                |
| hisHF    | An7430  | 1,347  | Putative glutamine amidotransferase with a predicted role in histidine metabolism                                                                                                                                                                |
| gukA     | An3641  | 1,931  | Ortholog(s) have gluconokinase activity, role in D-gluconate metabolic process and cytosol, nucleus localization                                                                                                                                 |
| hulA     | An1339  | 1,482  | Putative HECT ubiquitin ligase                                                                                                                                                                                                                   |
| hxA      | An5613  | 3,039  | Xanthine dehydrogenase (purine hydroxylase I) involved in purine catabolism; requires a molybdenum cofactor for function; induction by uric acid requires the product of the uaY regulatory gene                                                 |
| hxB      | An1637  | 1,825  | Putative molybdenum cofactor sulfuryase; mutants fail to accumulate uric acid; necessary for post translational modification of xanthine dehydrogenase and purine hydroxylase II; nitrogen metabolite repression mediated by AreA                |
| hxkA     | An7459  | 1,899  | Putative hexokinase with a predicted role in carbohydrate metabolism                                                                                                                                                                             |
| ileA     | An3830  | 1,343  | L-threonine dehydratase with a predicted role in glycine, serine, and threonine metabolism                                                                                                                                                       |
| jlbA     | An1812  | 2,428  | bZIP transcription factor; induced in response to amino acid starvation                                                                                                                                                                          |
| kgdB     | An3466  | 1,388  | Putative dihydroliipoamide S-succinyl transferase with a predicted role in the TCA cycle (                                                                                                                                                       |
| maeA     | An6168  | 2,636  | Putative malate dehydrogenase with a predicted role in oxidation of malate to pyruvate                                                                                                                                                           |
| maiA     | An1895  | 1,841  | Maleyl-acetoacetate isomerase, enzyme involved in phenylalanine catabolism                                                                                                                                                                       |
| meaA     | An7463  | 1,752  | Major ammonium transporter of A. nidulans; transcript upregulated by nitrate limitation                                                                                                                                                          |
| meaB     | An4900  | 2,96   | Putative bZIP DNA-binding protein involved in regulating nitrogen metabolite repression                                                                                                                                                          |
| metE     | An2229  | 1,979  | Putative O-acetyltransferase with a predicted role in amino acid metabolism                                                                                                                                                                      |
| mns1B    | An0787  | 1,454  | Putative mannosyl-oligosaccharide 1,2-alpha-mannosidase with a predicted role in mannose polymer metabolism                                                                                                                                      |
| msrA     | An10562 | 1,735  | Putative methionine sulfoxide reductase with a predicted role in the reduction of methionine sulfoxide to methionine                                                                                                                             |
| msrB     | An1932  | 2,231  | Putative methionine sulfoxide reductase with a predicted role in the reduction of methionine sulfoxide to methionine                                                                                                                             |
| nadA     | An6078  | 3,122  | Adenine deaminase with a role in nucleotide salvage pathways; induced by ammonium, uric acid and adenosine; nadA mRNA levels regulated by UaY and AreA; ortholog of Saccharomyces cerevisiae Aah1p and Schizosaccharomyces pombe dea2            |
| otaA     | An1810  | 2,277  | Ornithine transaminase, involved in utilization of arginine as a proline source; arginine-induced expression and activity; subject to carbon-catabolite and nitrogen-metabolite repression; regulated by CreA and AreA; stress-induced protein   |
| pdbB     | An5162  | 1,549  | Putative pyruvate dehydrogenase (lipoamide) with a predicted role in pyruvate metabolism                                                                                                                                                         |
| pdcC     | An9403  | 1,548  | Putative pyruvate dehydrogenase (lipoamide) with a predicted role in pyruvate metabolism                                                                                                                                                         |
| pgmA     | An3059  | 2,942  | Putative phosphoglycerate mutase with a predicted role in gluconeogenesis and glycolysis; expression upregulated after exposure to farnesol                                                                                                      |
| phk      | An4913  | 2,507  | Putative phosphoketolase with a predicted role in the phosphoketolase pathway                                                                                                                                                                    |
| phoA     | An8261  | 2,273  | Putative acid phosphatase with a predicted role in gluconic acid and gluconate metabolism                                                                                                                                                        |
| pyrABCN  | An0565  | 2,951  | Multifunctional enzyme with carbamoyl-phosphate synthase (CPSase) and aspartate carbamoyltransferase (ATCase) activities that catalyze the first two steps in pyrimidine biosynthesis                                                            |
| pyroA    | An7725  | 2,114  | Protein required for biosynthesis of pyridoxine; highly conserved throughout fungi, plants and bacteria                                                                                                                                          |
| qutC     | An1140  | 2,832  | Dehydroshikimate dehydratase, involved in quinic acid utilization                                                                                                                                                                                |
| qutG     | An1136  | 2,627  | Putative myo-inositol-1(or 4)-monophosphatase with a predicted role in phospholipid metabolism; transcript inducible by quinate                                                                                                                  |
| swoC     | An8851  | 2,303  | Predicted pseudouridylylase synthase, involved in establishment of cell polarity; mutants show defects in anisotropic growth, endocytosis, nuclear distribution and compartmentation; transcript upregulated in response to camptothecin         |
| swoF     | An3839  | 1,272  | Putative glycopeptide N-tetradecanoyltransferase involved in control of polar growth; predicted role in protein, peptide, and amino acid metabolism                                                                                              |
| swoM     | An6037  | 1,472  | Putative glucose-6-phosphate isomerase with a predicted role in gluconeogenesis and glycolysis; mutant defective in hyphal polarity and conidiation                                                                                              |
| tpiB     | An5908  | 1,65   | Putative triose-phosphate isomerase with a predicted role in glycolysis                                                                                                                                                                          |
| uaW      | An0070  | 2,051  | 2-oxo-4-hydroxy-4-carboxy-5-ureidoimidazole (OHCU) decarboxylase; involved in purine utilization; inducible by uric acid and repressible by ammonium; under the control of the UaY protein                                                       |
| uaX      | An2910  | 3,652  | 5-hydroxyisourate hydrolase; involved in purine utilisation; inducible by uric acid and repressible by ammonium; regulated by the UaY protein                                                                                                    |
| uaZ      | An9470  | 2,22   | Urate oxidase; catalyzes the formation of 5-hydroxy-isourate; regulated by UaY and AreA; putative sites for copper binding and a canonical PTS2 peroxisomal localization sequence                                                                |
| uapC     | An6730  | 2,214  | Low-to-moderate capacity, broad specificity purine permease; putative paralog of UapA; localized to the cell periphery, relocates to vacuoles in the presence of ammonium                                                                        |
| xanA     | An10081 | 2,749  | Alpha-ketoglutarate-dependent xanthine dioxygenase involved in the oxidation of xanthine to uric acid; regulated by uaY and AreA transcription factors; the 5' region of xanA is included in a heltron fragment and is duplicated in the genome  |
| aciA     | An6525  | -2,285 | Putative formate dehydrogenase with a predicted role in oxalic acid metabolism; intracellular; protein abundance decreased by menadione stress; inducible by acetate; expression reduced after exposure to farnesol                              |
| agdE     | An0941  | -2,093 | Protein with alpha-glucosidase activity, predicted role in maltose metabolism; transcriptionally induced by isomaltose in an amyR-dependent manner                                                                                               |
| alcC     | An2286  | -3,081 | Alcohol dehydrogenase III with a predicted role in two-carbon compound metabolism; required for long-term survival under anaerobic conditions; regulated at both the transcriptional and translational levels                                    |
| ladB     | An4366  | -1,814 | Putative L-arabinitol 4-dehydrogenase with a predicted role in L-arabinose/arabitol and D-xylose/D,L-xylose/xylitol metabolism                                                                                                                   |
| niiA     | An1007  | -1,798 | Putative nitrite reductase with a predicted role in nitrogen metabolism; transcript stabilized by intracellular nitrate                                                                                                                          |
| pacA     | An7142  | -3,153 | Putative secreted acid phosphatase with a predicted role in gluconic acid and gluconate metabolism                                                                                                                                               |
| pdkA     | An5843  | -3,105 | Putative pyruvate, water dikinase                                                                                                                                                                                                                |
| uaY      | An0891  | -1,455 | Zn(2)-Cys(6) binuclear cluster domain transcription factor required for positive regulation of genes involved in purine degradation pathway in response to uric acid; homology to Neurospora crassa pco-1                                        |
| CYP584E1 | An9384  | -1,332 | Putative cytochrome P450 alkane hydroxylase                                                                                                                                                                                                      |

### Supplementary table 3

| Unknown cellular process or other | An_____ | log 2FC | Description |
|-----------------------------------|---------|---------|-------------|
| chpA                              | An10148 | 2,33    |             |
| creD                              | An4170  | 1,517   |             |
| dicA                              | An6254  | 2,029   |             |
| faoA                              | An8123  | 4,143   |             |
| hapE                              | An6492  | 1,375   |             |
| hk2                               | An7945  | 1,813   |             |
| hsp104                            | An0858  | 1,839   |             |
| hulE                              | An1966  | 1,848   |             |
| cwc27                             | An8061  | 1,661   |             |
| cyp1                              | An8605  | 1,768   |             |
| cyp8                              | An9095  | 2,12    |             |
| cyp9                              | An6894  | 1,417   |             |
| napB                              | An8170  | 2,31    |             |
| nsa2                              | An2926  | 1,999   |             |
| palcA                             | An8271  | 2,201   |             |
| par1                              | An4069  | 1,855   |             |
| pdeB                              | An2740  | 3,089   |             |
| phbB                              | An6861  | 1,815   |             |
| pkcB                              | An5973  | 1,284   |             |
| rhbA                              | An8868  | 1,346   |             |
| sds3                              | An3178  | 1,61    |             |
| spgA                              | An7206  | 1,535   |             |
| srgL                              | An0069  | 1,365   |             |
| usgS                              | An4578  | 2,395   |             |
| iccD                              | An0878  | -1,518  |             |

# Supplementary figure 1

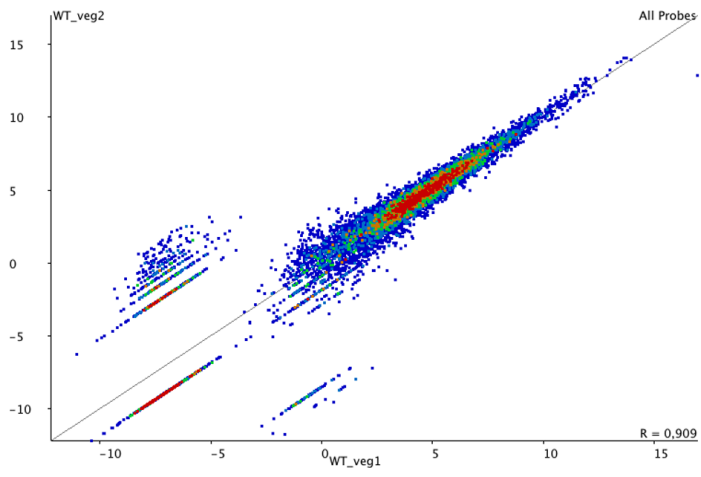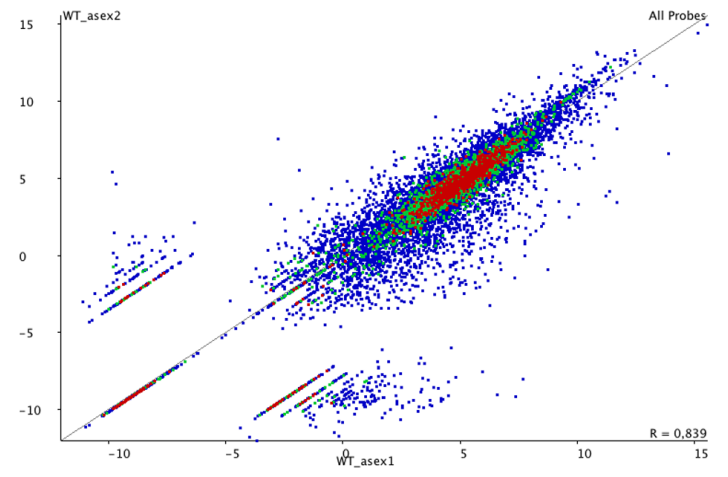

## Supplementary figure 2

### Cellular Component

| GO term                                                                   | Total GO count | FC>0 | FC<0 | FPKM total  | FPKM WT_5hasex | FPKM WT_veg | FPKM WT_veg-WT_5hasex when FC>0 | FPKM WT_5hasex-WT_veg when FC<0 |
|---------------------------------------------------------------------------|----------------|------|------|-------------|----------------|-------------|---------------------------------|---------------------------------|
| cellular_component                                                        | 1567           | 1459 | 108  | 684197,4621 | 132178,0607    | 552019,4014 | 432352,3469                     | 12511,00625                     |
| integral to membrane                                                      | 123            | 102  | 21   | 54987,78004 | 10594,34812    | 44393,43192 | 34951,90873                     | 1152,824917                     |
| nucleus                                                                   | 85             | 80   | 5    | 14818,12132 | 3095,74709     | 11722,37423 | 8744,75193                      | 118,12479                       |
| intracellular                                                             | 71             | 65   | 6    | 81232,73863 | 16380,987      | 64851,75163 | 52183,26732                     | 3712,50269                      |
| membrane                                                                  | 38             | 35   | 3    | 9054,855781 | 2396,922511    | 6657,93327  | 4574,013239                     | 313,00248                       |
| cytoplasm                                                                 | 12             | 10   | 2    | 9119,11391  | 1827,3682      | 7291,74571  | 5811,9216                       | 347,54409                       |
| ribosome                                                                  | 6              | 6    | 0    | 2582,9792   | 598,0642       | 1984,915    | 1386,8508                       | 0                               |
| fungal-type cell wall                                                     | 4              | 2    | 2    | 5130,57637  | 1762,448       | 3368,12837  | 2524,2864                       | 918,60603                       |
| large ribosomal subunit                                                   | 4              | 4    | 0    | 1310,58     | 277,864        | 1032,716    | 754,852                         | 0                               |
| small-subunit processome                                                  | 3              | 3    | 0    | 303,8705    | 62,9458        | 240,9247    | 177,9789                        | 0                               |
| spliceosomal complex                                                      | 3              | 3    | 0    | 872,4671    | 212,5884       | 659,8787    | 447,2903                        | 0                               |
| mitochondrion                                                             | 3              | 3    | 0    | 1627,4655   | 456,8705       | 1170,595    | 713,7245                        | 0                               |
| ubiquitin ligase complex                                                  | 3              | 3    | 0    | 432,48268   | 98,34208       | 334,1406    | 235,79852                       | 0                               |
| mitochondrial inner membrane                                              | 3              | 3    | 0    | 487,0928    | 117,4748       | 369,618     | 252,1432                        | 0                               |
| endoplasmic reticulum                                                     | 3              | 2    | 1    | 436,6902    | 122,0625       | 314,6277    | 232,6435                        | 40,0783                         |
| cytosol                                                                   | 3              | 2    | 1    | 1325,2589   | 722,0299       | 603,229     | 353,5191                        | 472,32                          |
| nucleolus                                                                 | 3              | 3    | 0    | 666,0421    | 90,4741        | 575,568     | 485,0939                        | 0                               |
| intrinsic to endoplasmic reticulum membrane                               | 2              | 1    | 1    | 130,11129   | 49,0105        | 81,10079    | 53,2506                         | 21,16031                        |
| peroxisomal membrane                                                      | 2              | 2    | 0    | 295,78768   | 41,17178       | 254,6159    | 213,44412                       | 0                               |
| ribonucleoprotein complex                                                 | 2              | 2    | 0    | 992,8109    | 167,723        | 825,0879    | 657,3649                        | 0                               |
| mediator complex                                                          | 2              | 2    | 0    | 414,637     | 105,332        | 309,305     | 203,973                         | 0                               |
| microtubule                                                               | 2              | 2    | 0    | 129,51841   | 18,68291       | 110,8355    | 92,15259                        | 0                               |
| nucleosome                                                                | 2              | 2    | 0    | 1513,378    | 373,582        | 1139,796    | 766,214                         | 0                               |
| extracellular region                                                      | 2              | 2    | 0    | 105,20054   | 17,62704       | 87,5735     | 69,94646                        | 0                               |
| plasma membrane                                                           | 2              | 2    | 0    | 94,9145     | 17,593         | 77,3215     | 59,7285                         | 0                               |
| Golgi membrane                                                            | 2              | 2    | 0    | 507,0191    | 112,2531       | 394,766     | 282,5129                        | 0                               |
| cell outer membrane                                                       | 2              | 2    | 0    | 348,93749   | 91,07249       | 257,865     | 166,79251                       | 0                               |
| Gram-negative-bacterium-type cell wall                                    | 1              | 1    | 0    | 794,3262    | 96,3152        | 698,011     | 601,6958                        | 0                               |
| box H/ACA snoRNP complex                                                  | 1              | 1    | 0    | 1068,555    | 228,482        | 840,073     | 611,591                         | 0                               |
| tight junction                                                            | 1              | 1    | 0    | 816,116     | 219,004        | 597,112     | 378,108                         | 0                               |
| chromosome, centromeric region                                            | 1              | 1    | 0    | 177,2641    | 46,5301        | 130,734     | 84,2039                         | 0                               |
| tRNA-intron endonuclease complex                                          | 1              | 1    | 0    | 130,3955    | 31,6422        | 98,7533     | 67,1111                         | 0                               |
| preribosome, small subunit precursor                                      | 1              | 1    | 0    | 104,8789    | 18,9086        | 85,9703     | 67,0617                         | 0                               |
| peroxisome                                                                | 1              | 1    | 0    | 8222,404    | 618,604        | 7603,8      | 6985,196                        | 0                               |
| fatty acid synthase complex                                               | 1              | 0    | 1    | 10,81202    | 9,31054        | 1,50148     | 0                               | 7,80906                         |
| mitochondrial ribosome                                                    | 1              | 1    | 0    | 351,1766    | 88,8486        | 262,328     | 173,4794                        | 0                               |
| proton-transporting ATP synthase complex, catalytic core F(1)             | 1              | 1    | 0    | 6,866202    | 0,554272       | 6,31193     | 5,757658                        | 0                               |
| chromosome                                                                | 1              | 1    | 0    | 23,20958    | 3,61888        | 19,5907     | 15,97182                        | 0                               |
| viral capsid                                                              | 1              | 1    | 0    | 104,1798    | 27,2096        | 76,9702     | 49,7606                         | 0                               |
| proton-transporting two-sector ATPase complex, proton-transporting domain | 1              | 1    | 0    | 35,10226    | 5,78066        | 29,3216     | 23,54094                        | 0                               |
| hyphal tip                                                                | 1              | 1    | 0    | 247,1804    | 57,9074        | 189,273     | 131,3656                        | 0                               |
| kinesin complex                                                           | 1              | 1    | 0    | 26,73645    | 5,53535        | 21,2011     | 15,66575                        | 0                               |
| transcription factor TFIID complex                                        | 1              | 1    | 0    | 107,2897    | 29,401         | 77,8887     | 48,4877                         | 0                               |
| outer membrane-bounded periplasmic space                                  | 1              | 1    | 0    | 301,3449    | 73,1999        | 228,145     | 154,9451                        | 0                               |
| cis-Golgi network                                                         | 1              | 1    | 0    | 273,2399    | 60,4459        | 212,794     | 152,3481                        | 0                               |
| eukaryotic translation initiation factor 3 complex                        | 1              | 1    | 0    | 419,917     | 103,683        | 316,234     | 212,551                         | 0                               |
| nuclear envelope                                                          | 1              | 1    | 0    | 167,9551    | 27,8381        | 140,117     | 112,2789                        | 0                               |



# Supplementary figure 2

## Cellular Component

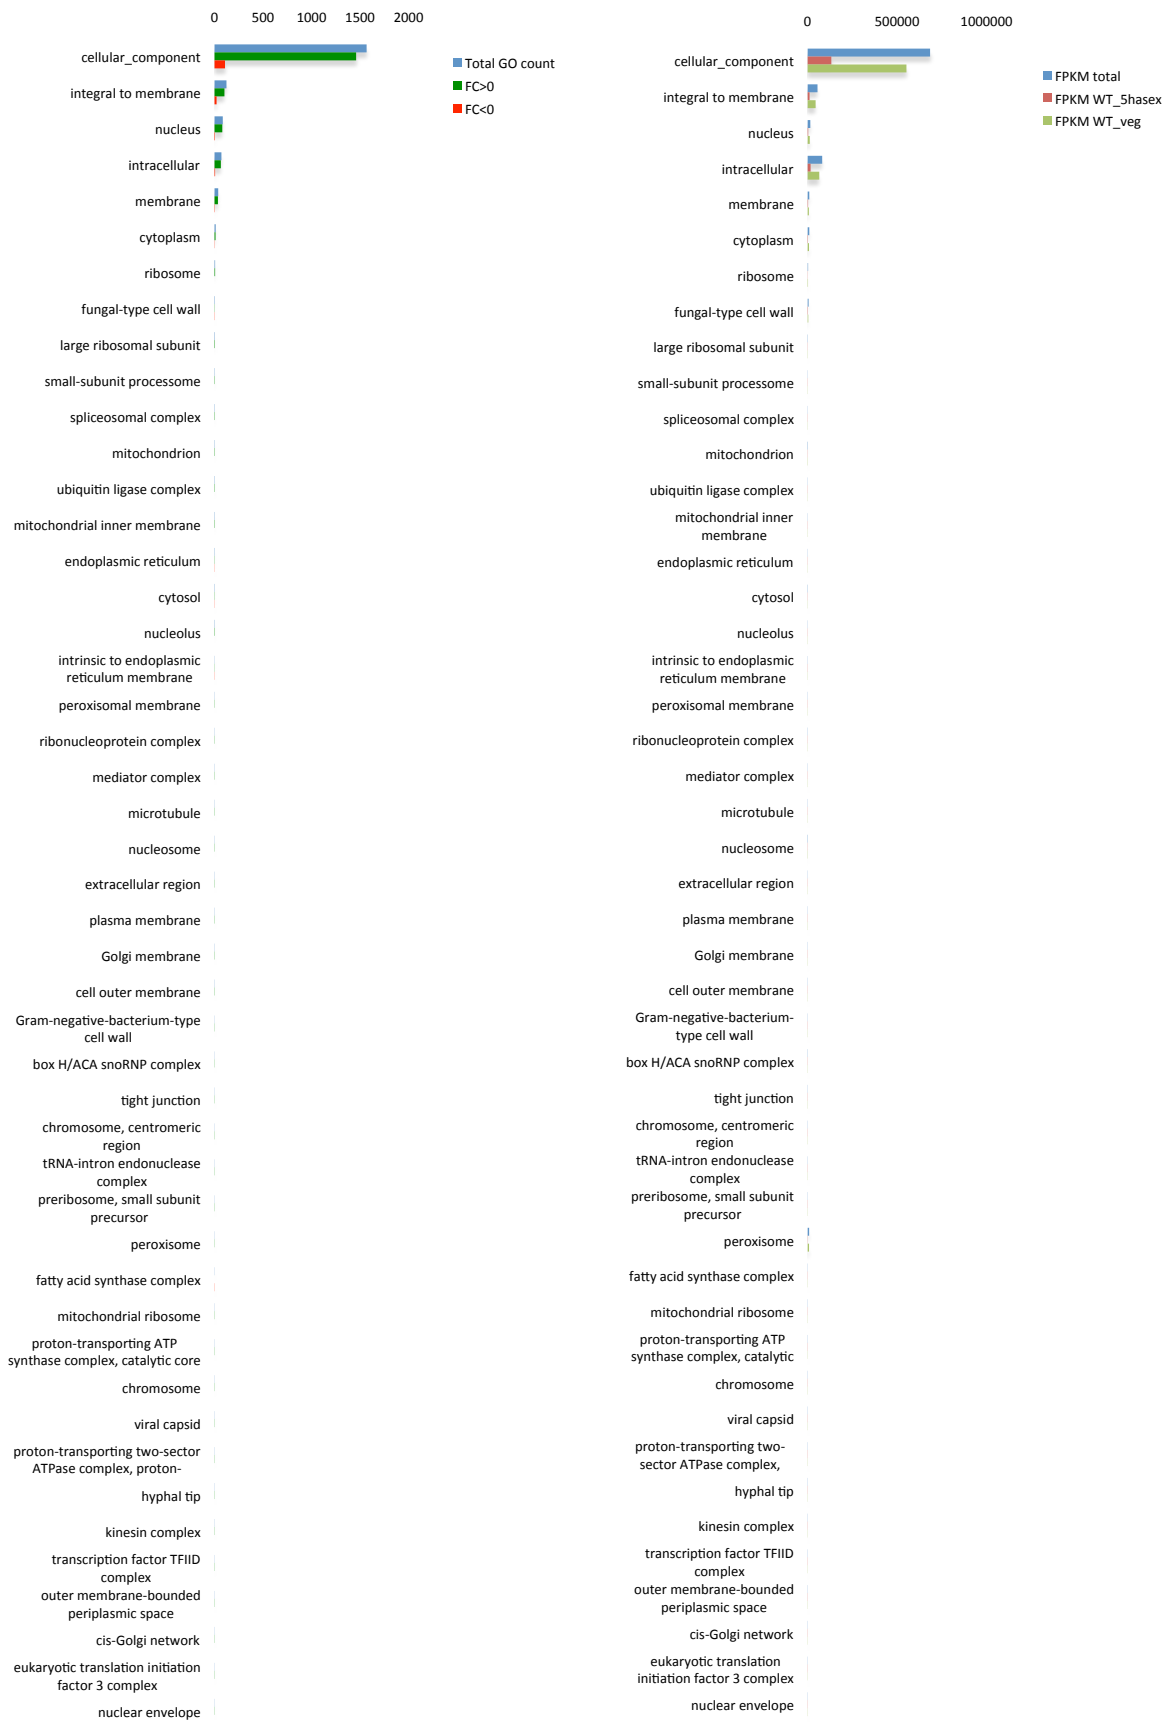

## Supplementary figure 2

### Molecular Function

| GO term                                                                                         | Total GO count | FC>0 | FC<0 | FPKM total  | FPKM WT_5hasex | FPKM WT_veg | FPKM WT_veg-WT_5has | FPKM WT_5hasex-WT_veg when FC<0 |
|-------------------------------------------------------------------------------------------------|----------------|------|------|-------------|----------------|-------------|---------------------|---------------------------------|
| molecular_function                                                                              | 1040           | 979  | 61   | 609554,2764 | 113900,0895    | 495654,1869 | 395039,7415         | 13285,64411                     |
| zinc ion binding                                                                                | 131            | 120  | 11   | 23201,42738 | 5020,723775    | 18180,7036  | 13523,5991          | 363,61927                       |
| ATP binding                                                                                     | 116            | 111  | 5    | 28749,98287 | 5472,066283    | 23277,91658 | 17869,87705         | 64,026748                       |
| nucleotide binding                                                                              | 106            | 103  | 3    | 31435,42716 | 5953,168944    | 25482,25822 | 19550,32127         | 21,231994                       |
| nucleic acid binding                                                                            | 78             | 76   | 2    | 15639,32088 | 2967,123988    | 12672,19689 | 9731,508862         | 26,43596                        |
| oxidoreductase activity                                                                         | 77             | 66   | 11   | 15739,55947 | 3575,860041    | 12163,69943 | 8929,034729         | 341,195338                      |
| DNA binding                                                                                     | 70             | 66   | 4    | 27189,89865 | 5266,86726     | 21923,03139 | 16732,18482         | 76,02069                        |
| sequence-specific DNA binding transcription factor activity                                     | 56             | 50   | 6    | 5796,57317  | 1439,61802     | 4356,95515  | 3055,085            | 137,74787                       |
| binding                                                                                         | 35             | 34   | 1    | 6056,688639 | 1391,646139    | 4665,0425   | 3351,360461         | 77,9641                         |
| catalytic activity                                                                              | 32             | 27   | 5    | 5948,38227  | 1117,67965     | 4830,70262  | 3798,01836          | 84,99539                        |
| RNA binding                                                                                     | 28             | 28   | 0    | 4977,28578  | 1031,2699      | 3946,01588  | 2914,74598          | 0                               |
| flavin adenine dinucleotide binding                                                             | 25             | 14   | 11   | 2451,867489 | 800,616479     | 1651,25101  | 1170,614311         | 319,97978                       |
| hydrolase activity                                                                              | 23             | 22   | 1    | 11391,66427 | 2193,60059     | 9198,06368  | 7044,05244          | 39,58935                        |
| ATP-dependent helicase activity                                                                 | 21             | 20   | 1    | 4545,10524  | 828,77991      | 3716,32533  | 2894,3583           | 6,81288                         |
| GTP binding                                                                                     | 20             | 20   | 0    | 5342,27171  | 1233,23701     | 4109,0347   | 2875,79769          | 0                               |
| nucleoside-triphosphatase activity                                                              | 14             | 14   | 0    | 2363,11859  | 523,60869      | 1839,5099   | 1315,90121          | 0                               |
| protein serine/threonine kinase activity                                                        | 13             | 13   | 0    | 4287,601463 | 791,710423     | 3495,89104  | 2704,180617         | 0                               |
| DNA-directed RNA polymerase activity                                                            | 12             | 12   | 0    | 1632,49691  | 273,58131      | 1358,9156   | 1085,33429          | 0                               |
| substrate-specific transmembrane transporter activity                                           | 12             | 10   | 2    | 1353,260528 | 265,01586      | 1088,244668 | 846,4379            | 23,209092                       |
| structural constituent of ribosome                                                              | 11             | 11   | 0    | 4244,7358   | 964,7768       | 3279,959    | 2315,1822           | 0                               |
| calcium ion binding                                                                             | 11             | 11   | 0    | 2305,31966  | 537,90276      | 1767,4169   | 1229,51414          | 0                               |
| heat shock protein binding                                                                      | 11             | 11   | 0    | 4725,58372  | 993,21722      | 3732,3665   | 2739,14928          | 0                               |
| iron ion binding                                                                                | 10             | 7    | 3    | 6675,904547 | 1474,503207    | 5201,40134  | 3883,352373         | 156,45424                       |
| pyridoxal phosphate binding                                                                     | 10             | 9    | 1    | 2761,42084  | 645,87211      | 2115,54873  | 1548,20642          | 78,5298                         |
| cation binding                                                                                  | 10             | 5    | 5    | 2781,932681 | 751,8004       | 2030,132281 | 1472,1971           | 193,865219                      |
| FMN binding                                                                                     | 10             | 8    | 2    | 1581,59524  | 422,5119       | 1159,08334  | 834,6066            | 98,03516                        |
| transferase activity, transferring acyl groups other than amino-acyl groups                     | 10             | 8    | 2    | 365,332247  | 78,580952      | 286,751295  | 222,153828          | 13,983485                       |
| metal ion transmembrane transporter activity                                                    | 9              | 9    | 0    | 1439,64739  | 261,00409      | 1178,6433   | 917,63921           | 0                               |
| sequence-specific DNA binding                                                                   | 9              | 9    | 0    | 1862,47508  | 433,00678      | 1429,4683   | 996,46152           | 0                               |
| NAD binding                                                                                     | 9              | 6    | 3    | 7371,578143 | 2256,474833    | 5115,10331  | 3694,284567         | 835,65609                       |
| electron carrier activity                                                                       | 9              | 7    | 2    | 3005,64728  | 1424,89645     | 1580,75083  | 942,66755           | 786,81317                       |
| GTPase activity                                                                                 | 9              | 9    | 0    | 1039,4632   | 239,1445       | 800,3187    | 561,1742            | 0                               |
| magnesium ion binding                                                                           | 9              | 9    | 0    | 7021,58691  | 1390,6889      | 5630,89801  | 4240,20911          | 0                               |
| coenzyme binding                                                                                | 8              | 8    | 0    | 8275,74194  | 1194,63546     | 7081,10648  | 5886,47102          | 0                               |
| hydrolase activity, acting on ester bonds                                                       | 8              | 5    | 3    | 1729,02875  | 564,26318      | 1164,76557  | 801,65122           | 201,14883                       |
| N-acetyltransferase activity                                                                    | 8              | 8    | 0    | 1845,31842  | 322,72622      | 1522,5922   | 1199,86598          | 0                               |
| NADP binding                                                                                    | 8              | 5    | 3    | 1915,50914  | 453,3063       | 1462,20284  | 1078,4247           | 69,52816                        |
| protein tyrosine kinase activity                                                                | 8              | 8    | 0    | 1430,401033 | 275,919993     | 1154,48104  | 878,561047          | 0                               |
| acyl carrier activity                                                                           | 8              | 5    | 3    | 420,352818  | 95,478662      | 324,874156  | 246,554728          | 17,159234                       |
| monooxygenase activity                                                                          | 8              | 3    | 5    | 430,055663  | 260,36391      | 169,691753  | 94,08649            | 184,758647                      |
| translation initiation factor activity                                                          | 8              | 8    | 0    | 2031,23687  | 511,84747      | 1519,3894   | 1007,54193          | 0                               |
| helicase activity                                                                               | 8              | 8    | 0    | 503,89153   | 123,17703      | 380,7145    | 257,53747           | 0                               |
| ATPase activity, coupled to transmembrane movement of substances                                | 7              | 5    | 2    | 451,493914  | 92,71678       | 358,777134  | 297,94412           | 31,883766                       |
| cofactor binding                                                                                | 7              | 5    | 2    | 507,637314  | 113,81714      | 393,820174  | 291,68219           | 11,679156                       |
| iron-sulfur cluster binding                                                                     | 7              | 7    | 0    | 3767,4134   | 825,2246       | 2942,1888   | 2116,9642           | 0                               |
| ATPase activity                                                                                 | 7              | 7    | 0    | 3068,99525  | 370,86637      | 2698,12888  | 2327,26251          | 0                               |
| metal ion binding                                                                               | 7              | 6    | 1    | 2212,07218  | 424,1263       | 1787,94588  | 1377,9301           | 14,11052                        |
| phosphopantetheine binding                                                                      | 7              | 4    | 3    | 415,490816  | 94,98168       | 320,509136  | 242,68669           | 17,159234                       |
| methyltransferase activity                                                                      | 7              | 7    | 0    | 991,18939   | 209,71929      | 781,4701    | 571,75081           | 0                               |
| UDP-N-acetylmuramate dehydrogenase activity                                                     | 7              | 5    | 2    | 333,98177   | 145,1722       | 188,80957   | 111,00541           | 67,36804                        |
| unfolded protein binding                                                                        | 6              | 6    | 0    | 2088,8106   | 461,6007       | 1627,2099   | 1165,6092           | 0                               |
| structural molecule activity                                                                    | 6              | 6    | 0    | 2782,12541  | 662,82191      | 2119,3035   | 1456,48159          | 0                               |
| protein dimerization activity                                                                   | 6              | 6    | 0    | 1059,2729   | 240,5037       | 818,7692    | 578,2655            | 0                               |
| oxidoreductase activity, acting on the aldehyde or oxo group of donors, NAD or NADP as acceptor | 6              | 4    | 2    | 1210,55911  | 601,8778       | 608,68131   | 354,3476            | 347,54409                       |
| amino acid transmembrane transporter activity                                                   | 6              | 5    | 1    | 1500,57335  | 639,15115      | 861,4222    | 506,08505           | 283,814                         |
| oxidoreductase activity, acting on CH-OH group of donors                                        | 5              | 1    | 4    | 216,395109  | 182,294029     | 34,10108    | 3,440551            | 151,6335                        |

## Supplementary figure 2

|                                                                                                        |   |   |   |             |            |            |            |           |
|--------------------------------------------------------------------------------------------------------|---|---|---|-------------|------------|------------|------------|-----------|
| transferase activity, transferring phosphorus-containing groups                                        | 5 | 5 | 0 | 1271,6182   | 295,8045   | 975,8137   | 680,0092   | 0         |
| carbon-sulfur lyase activity                                                                           | 5 | 5 | 0 | 1123,09937  | 187,29327  | 935,8061   | 748,51283  | 0         |
| oxidoreductase activity, acting on paired donors, with incorporation or reduction of molecular oxygen, | 5 | 4 | 1 | 389,7312    | 84,30287   | 305,42833  | 236,31823  | 15,19277  |
| hydrolase activity, hydrolyzing O-glycosyl compounds                                                   | 5 | 2 | 3 | 1694,91315  | 390,8482   | 1304,06495 | 994,9401   | 81,72335  |
| transporter activity                                                                                   | 5 | 4 | 1 | 3180,97032  | 597,3814   | 2583,58892 | 2092,6393  | 106,43178 |
| copper ion binding                                                                                     | 4 | 4 | 0 | 615,11749   | 167,31319  | 447,8043   | 280,49111  | 0         |
| transferase activity                                                                                   | 4 | 3 | 1 | 181,888194  | 41,71075   | 140,177444 | 100,14961  | 1,682916  |
| aminopeptidase activity                                                                                | 4 | 3 | 1 | 632,33973   | 172,8911   | 459,44863  | 302,8007   | 16,24317  |
| N,N-dimethylaniline monooxygenase activity                                                             | 4 | 2 | 2 | 1213,41891  | 266,367    | 947,05191  | 740,2416   | 59,55669  |
| two-component response regulator activity                                                              | 4 | 4 | 0 | 1739,6256   | 344,2486   | 1395,377   | 1051,1284  | 0         |
| oxidoreductase activity, acting on the CH-OH group of donors, NAD or NADP as acceptor                  | 4 | 3 | 1 | 1159,032633 | 705,799233 | 453,2334   | 235,546167 | 488,112   |
| ubiquitin-protein ligase activity                                                                      | 4 | 4 | 0 | 477,54588   | 111,00198  | 366,5439   | 255,54192  | 0         |
| heme binding                                                                                           | 4 | 2 | 2 | 1126,05068  | 755,83618  | 370,2145   | 143,54562  | 529,1673  |
| DNA-directed DNA polymerase activity                                                                   | 4 | 4 | 0 | 210,28247   | 47,69417   | 162,5883   | 114,89413  | 0         |
| acid phosphatase activity                                                                              | 4 | 4 | 0 | 1164,98522  | 220,47592  | 944,5093   | 724,03338  | 0         |
| two-component sensor activity                                                                          | 4 | 4 | 0 | 1739,6256   | 344,2486   | 1395,377   | 1051,1284  | 0         |
| carboxy-lyase activity                                                                                 | 4 | 3 | 1 | 386,43951   | 108,3737   | 278,06581  | 180,0122   | 10,32009  |
| ubiquitin thioesterase activity                                                                        | 4 | 4 | 0 | 345,98121   | 73,48241   | 272,4988   | 199,01639  | 0         |
| protein tyrosine phosphatase activity                                                                  | 4 | 4 | 0 | 591,99212   | 137,33362  | 454,6585   | 317,32488  | 0         |
| transferase activity, transferring hexosyl groups                                                      | 4 | 2 | 2 | 483,32754   | 205,3093   | 278,01824  | 161,054    | 88,34506  |
| 3'-5'-exoribonuclease activity                                                                         | 3 | 3 | 0 | 475,0877    | 120,2411   | 354,8466   | 234,6055   | 0         |
| carbon-nitrogen ligase activity, with glutamine as amido-N-donor                                       | 3 | 3 | 0 | 130,79405   | 26,49225   | 104,3018   | 77,80955   | 0         |
| hydrolase activity, acting on carbon-nitrogen (but not peptide) bonds, in linear amides                | 3 | 3 | 0 | 240,42533   | 59,97933   | 180,446    | 120,46667  | 0         |
| ribose phosphate diphosphokinase activity                                                              | 3 | 3 | 0 | 1124,8334   | 218,2304   | 906,603    | 688,3726   | 0         |
| metalloexopeptidase activity                                                                           | 3 | 3 | 0 | 601,3921    | 149,2957   | 452,0964   | 302,8007   | 0         |
| phosphatidylserine decarboxylase activity                                                              | 3 | 3 | 0 | 539,6348    | 83,6068    | 456,028    | 372,4212   | 0         |
| pseudouridylate synthase activity                                                                      | 3 | 3 | 0 | 296,7556    | 64,1795    | 232,5761   | 168,3966   | 0         |
| nucleotidyltransferase activity                                                                        | 3 | 3 | 0 | 263,52288   | 62,66508   | 200,8578   | 138,19272  | 0         |
| RNA-directed DNA polymerase activity                                                                   | 3 | 3 | 0 | 36,85045    | 6,25327    | 30,59718   | 24,34391   | 0         |
| quinone binding                                                                                        | 3 | 3 | 0 | 237,20849   | 58,92019   | 178,2883   | 119,36811  | 0         |
| histone-lysine N-methyltransferase activity                                                            | 3 | 3 | 0 | 135,62278   | 35,67848   | 99,9443    | 64,26582   | 0         |
| rRNA binding                                                                                           | 3 | 3 | 0 | 956,6358    | 179,6488   | 776,987    | 597,3382   | 0         |
| succinate dehydrogenase activity                                                                       | 3 | 2 | 1 | 2408,198    | 1317,427   | 1090,771   | 549,092    | 775,748   |
| primary amine oxidase activity                                                                         | 3 | 3 | 0 | 237,20849   | 58,92019   | 178,2883   | 119,36811  | 0         |
| aminoacyl-tRNA ligase activity                                                                         | 3 | 3 | 0 | 649,5707    | 88,6697    | 560,901    | 472,2313   | 0         |
| aspartic-type endopeptidase activity                                                                   | 3 | 3 | 0 | 928,86353   | 167,31263  | 761,5509   | 594,23827  | 0         |
| ribonucleoside binding                                                                                 | 3 | 3 | 0 | 181,40851   | 48,82901   | 132,5795   | 83,75049   | 0         |
| metalloendopeptidase activity                                                                          | 3 | 3 | 0 | 285,51081   | 57,21065   | 228,30016  | 171,08951  | 0         |
| RNA polymerase II transcription cofactor activity                                                      | 2 | 2 | 0 | 414,637     | 105,332    | 309,305    | 203,973    | 0         |
| 4 iron, 4 sulfur cluster binding                                                                       | 2 | 2 | 0 | 437,8629    | 97,0599    | 340,803    | 243,7431   | 0         |
| protein tyrosine/serine/threonine phosphatase activity                                                 | 2 | 2 | 0 | 247,18922   | 62,16572   | 185,0235   | 122,85778  | 0         |
| phosphogluconate dehydrogenase (decarboxylating) activity                                              | 2 | 2 | 0 | 81,52456    | 19,64776   | 61,8768    | 42,22904   | 0         |
| endonuclease activity                                                                                  | 2 | 2 | 0 | 414,0435    | 90,1265    | 323,917    | 233,7905   | 0         |
| 2 iron, 2 sulfur cluster binding                                                                       | 2 | 2 | 0 | 899,0176    | 229,9674   | 669,0502   | 439,0828   | 0         |
| IMP dehydrogenase activity                                                                             | 2 | 2 | 0 | 1320,3791   | 211,8271   | 1108,552   | 896,7249   | 0         |
| ADP binding                                                                                            | 2 | 2 | 0 | 79,06677    | 9,56567    | 69,5011    | 59,93543   | 0         |
| dihydroneopterin aldolase activity                                                                     | 2 | 2 | 0 | 385,2824    | 84,2664    | 301,016    | 216,7496   | 0         |
| acyl-CoA dehydrogenase activity                                                                        | 2 | 1 | 1 | 138,54242   | 106,80172  | 31,7407    | 11,18888   | 86,2499   |
| double-stranded RNA binding                                                                            | 2 | 2 | 0 | 346,6474    | 84,5404    | 262,107    | 177,5666   | 0         |
| identical protein binding                                                                              | 2 | 2 | 0 | 210,07069   | 41,70549   | 168,3652   | 126,65971  | 0         |
| transferase activity, transferring nitrogenous groups                                                  | 2 | 2 | 0 | 1021,3734   | 179,4294   | 841,944    | 662,5146   | 0         |
| ATPase activity, coupled to transmembrane movement of ions, phosphorylative mechanism                  | 2 | 2 | 0 | 160,8807    | 41,6672    | 119,2135   | 77,5463    | 0         |
| protein kinase binding                                                                                 | 2 | 2 | 0 | 581,0842    | 114,0822   | 467,002    | 352,9198   | 0         |
| triglyceride lipase activity                                                                           | 2 | 2 | 0 | 600,0594    | 145,524    | 454,5354   | 309,0114   | 0         |
| hydrogen:potassium-exchanging ATPase activity                                                          | 2 | 1 | 1 | 310,91698   | 84,4661    | 226,45088  | 156,0953   | 14,11052  |
| peptidyl-prolyl cis-trans isomerase activity                                                           | 2 | 2 | 0 | 5098,1057   | 1152,042   | 3946,0637  | 2794,0217  | 0         |
| serine-type peptidase activity                                                                         | 2 | 2 | 0 | 12,462653   | 0,647223   | 11,81543   | 11,168207  | 0         |
| phosphatidylinositol phospholipase C activity                                                          | 2 | 2 | 0 | 82,79073    | 19,78863   | 63,0021    | 43,21347   | 0         |

## Supplementary figure 2

|                                                                                                       |   |   |   |            |           |            |            |          |
|-------------------------------------------------------------------------------------------------------|---|---|---|------------|-----------|------------|------------|----------|
| 3-hydroxypalmitoyl-[acyl-carrier-protein] dehydratase activity                                        | 2 | 1 | 1 | 2436,15602 | 523,33454 | 1912,82148 | 1397,296   | 7,80906  |
| mannitol 2-dehydrogenase (NADP+) activity                                                             | 2 | 2 | 0 | 2690,9487  | 640,62    | 2050,3287  | 1409,7087  | 0        |
| 5'-nucleotidase activity                                                                              | 2 | 2 | 0 | 283,21327  | 59,65867  | 223,5546   | 163,89593  | 0        |
| ribonuclease III activity                                                                             | 2 | 2 | 0 | 416,6998   | 108,5208  | 308,179    | 199,6582   | 0        |
| glutaminase activity                                                                                  | 2 | 1 | 1 | 115,59359  | 44,3968   | 71,19679   | 42,1298    | 15,32981 |
| protein transporter activity                                                                          | 2 | 2 | 0 | 474,8549   | 74,1449   | 400,71     | 326,5651   | 0        |
| riboflavin reductase (NADPH) activity                                                                 | 2 | 1 | 1 | 850,9703   | 627,725   | 223,2453   | 67,8403    | 472,32   |
| carbohydrate binding                                                                                  | 2 | 0 | 2 | 37,54658   | 32,4267   | 5,11988    | 0          | 27,30682 |
| nutrient reservoir activity                                                                           | 2 | 1 | 1 | 354,04878  | 53,6627   | 300,38608  | 282,5531   | 35,82972 |
| lathosterol oxidase activity                                                                          | 2 | 1 | 1 | 736,1877   | 319,074   | 417,1137   | 228,236    | 130,1963 |
| prenyltransferase activity                                                                            | 2 | 1 | 1 | 77,04755   | 58,45932  | 18,58823   | 10,13578   | 50,00687 |
| O-methyltransferase activity                                                                          | 2 | 2 | 0 | 1502,94764 | 221,28244 | 1281,6652  | 1060,38276 | 0        |
| NAD+ binding                                                                                          | 2 | 2 | 0 | 354,4566   | 92,7255   | 261,7311   | 169,0056   | 0        |
| transmembrane transporter activity                                                                    | 2 | 2 | 0 | 906,1949   | 188,2769  | 717,918    | 529,6411   | 0        |
| L-xylulose reductase (NADP+) activity                                                                 | 2 | 2 | 0 | 2690,9487  | 640,62    | 2050,3287  | 1409,7087  | 0        |
| damaged DNA binding                                                                                   | 2 | 2 | 0 | 114,96586  | 28,83496  | 86,1309    | 57,29594   | 0        |
| lyase activity                                                                                        | 2 | 2 | 0 | 177,63936  | 44,07956  | 133,5598   | 89,48024   | 0        |
| oxidoreductase activity, acting on paired donors, with incorporation or reduction of molecular oxygen | 2 | 1 | 1 | 212,98098  | 79,0653   | 133,91568  | 92,8953    | 38,04492 |
| molybdenum ion binding                                                                                | 2 | 2 | 0 | 89,62823   | 12,25823  | 77,37      | 65,11177   | 0        |
| tRNA (adenine-N1-)-methyltransferase activity                                                         | 2 | 2 | 0 | 110,47359  | 24,25619  | 86,2174    | 61,96121   | 0        |
| calcium-transporting ATPase activity                                                                  | 2 | 1 | 1 | 310,91698  | 84,4661   | 226,45088  | 156,0953   | 14,11052 |
| transcription regulatory region DNA binding                                                           | 2 | 2 | 0 | 250,25864  | 65,36761  | 184,89103  | 119,52342  | 0        |
| ribonuclease H activity                                                                               | 2 | 2 | 0 | 91,61964   | 22,06484  | 69,5548    | 47,48996   | 0        |
| metallopeptidase activity                                                                             | 2 | 1 | 1 | 87,85171   | 33,4426   | 54,40911   | 32,9151    | 11,94859 |
| pseudouridine synthase activity                                                                       | 2 | 2 | 0 | 1130,5913  | 243,1229  | 887,4684   | 644,3455   | 0        |
| snoRNA binding                                                                                        | 2 | 2 | 0 | 1119,64676 | 233,19096 | 886,4558   | 653,26484  | 0        |
| acid-amino acid ligase activity                                                                       | 2 | 2 | 0 | 90,36364   | 15,18074  | 75,1829    | 60,00216   | 0        |
| tartrate dehydrogenase activity                                                                       | 2 | 2 | 0 | 5367,339   | 1036,645  | 4330,694   | 3294,049   | 0        |
| protein disulfide oxidoreductase activity                                                             | 2 | 2 | 0 | 498,7971   | 98,9781   | 399,819    | 300,8409   | 0        |
| phosphatidylinositol binding                                                                          | 1 | 1 | 0 | 812,177    | 125,892   | 686,285    | 560,393    | 0        |
| sugar:hydrogen symporter activity                                                                     | 1 | 1 | 0 | 233,7792   | 51,8072   | 181,972    | 130,1648   | 0        |
| arginyltransferase activity                                                                           | 1 | 1 | 0 | 159,482    | 39,807    | 119,675    | 79,868     | 0        |
| GMP synthase activity                                                                                 | 1 | 1 | 0 | 2425,344   | 514,024   | 1911,32    | 1397,296   | 0        |
| translation release factor activity                                                                   | 1 | 1 | 0 | 341,0282   | 92,4362   | 248,592    | 156,1558   | 0        |
| argininosuccinate synthase activity                                                                   | 1 | 1 | 0 | 826,632    | 229,718   | 596,914    | 367,196    | 0        |
| calcium-dependent cysteine-type endopeptidase activity                                                | 1 | 1 | 0 | 58,7634    | 15,9285   | 42,8349    | 26,9064    | 0        |
| 2-dehydropantoate 2-reductase activity                                                                | 1 | 1 | 0 | 330,0101   | 76,4191   | 253,591    | 177,1719   | 0        |
| transcription coactivator activity                                                                    | 1 | 1 | 0 | 362,4816   | 98,1996   | 264,282    | 166,0824   | 0        |
| peroxisome membrane targeting sequence binding                                                        | 1 | 1 | 0 | 261,008    | 34,163    | 226,845    | 192,682    | 0        |
| oxalate decarboxylase activity                                                                        | 1 | 0 | 1 | 47,89388   | 41,8618   | 6,03208    | 0          | 35,82972 |
| glycerol-3-phosphate O-acyltransferase activity                                                       | 1 | 1 | 0 | 414,555    | 89,789    | 324,766    | 234,977    | 0        |
| UDP-glucose 4-epimerase activity                                                                      | 1 | 1 | 0 | 131,7285   | 30,3925   | 101,336    | 70,9435    | 0        |
| lysozyme activity                                                                                     | 1 | 0 | 1 | 36,29198   | 33,694    | 2,59798    | 0          | 31,09602 |
| phosphoglycerate mutase activity                                                                      | 1 | 1 | 0 | 572,086    | 129,72    | 442,366    | 312,646    | 0        |
| metallocarboxypeptidase activity                                                                      | 1 | 1 | 0 | 14,54674   | 2,24534   | 12,3014    | 10,05606   | 0        |
| fatty-acyl-CoA binding                                                                                | 1 | 1 | 0 | 2425,344   | 514,024   | 1911,32    | 1397,296   | 0        |
| L-aminoadipate-semialdehyde dehydrogenase activity                                                    | 1 | 1 | 0 | 274,4196   | 50,1556   | 224,264    | 174,1084   | 0        |
| L-ascorbic acid binding                                                                               | 1 | 1 | 0 | 161,6817   | 20,7347   | 140,947    | 120,2123   | 0        |
| glutamate-tRNA ligase activity                                                                        | 1 | 1 | 0 | 271,3939   | 77,3139   | 194,08     | 116,7661   | 0        |
| chitin binding                                                                                        | 1 | 1 | 0 | 191,7521   | 44,8171   | 146,935    | 102,1179   | 0        |
| aspartate-tRNA ligase activity                                                                        | 1 | 1 | 0 | 2648,469   | 338,739   | 2309,73    | 1970,991   | 0        |
| protein C-terminal S-isoprenylcysteine carboxyl O-methyltransferase activity                          | 1 | 0 | 1 | 258,6519   | 218,356   | 40,2959    | 0          | 178,0601 |
| phosphatidate cytidyltransferase activity                                                             | 1 | 1 | 0 | 402,208    | 98,368    | 303,84     | 205,472    | 0        |
| 1,3-beta-glucanosyltransferase activity                                                               | 1 | 0 | 1 | 155,7981   | 114,315   | 41,4831    | 0          | 72,8319  |
| dipeptidyl-peptidase activity                                                                         | 1 | 0 | 1 | 30,94763   | 23,5954   | 7,35223    | 0          | 16,24317 |
| succinate-semialdehyde dehydrogenase [NAD(P)+] activity                                               | 1 | 1 | 0 | 624,679    | 115,243   | 509,436    | 394,193    | 0        |
| serine-type endopeptidase inhibitor activity                                                          | 1 | 1 | 0 | 11700,66   | 1267,06   | 10433,6    | 9166,54    | 0        |
| transferase activity, transferring glycosyl groups                                                    | 1 | 1 | 0 | 377,5338   | 99,9668   | 277,567    | 177,6002   | 0        |

## Supplementary figure 2

|                                                                  |   |   |   |           |          |          |          |           |
|------------------------------------------------------------------|---|---|---|-----------|----------|----------|----------|-----------|
| inorganic phosphate transmembrane transporter activity           | 1 | 1 | 0 | 4,610091  | 0,407641 | 4,20245  | 3,794809 | 0         |
| tyrosine-tRNA ligase activity                                    | 1 | 1 | 0 | 170,405   | 40,415   | 129,99   | 89,575   | 0         |
| 3-oxoacyl-[acyl-carrier-protein] synthase activity               | 1 | 1 | 0 | 2425,344  | 514,024  | 1911,32  | 1397,296 | 0         |
| lipoate synthase activity                                        | 1 | 1 | 0 | 156,232   | 37,056   | 119,176  | 82,12    | 0         |
| methylenetetrahydrofolate dehydrogenase (NAD+) activity          | 1 | 1 | 0 | 253,0096  | 57,4116  | 195,598  | 138,1864 | 0         |
| glutamate dehydrogenase (NAD+) activity                          | 1 | 1 | 0 | 305,2429  | 72,2029  | 233,04   | 160,8371 | 0         |
| octanoyltransferase activity                                     | 1 | 1 | 0 | 269,9177  | 73,4557  | 196,462  | 123,0063 | 0         |
| deaminase activity                                               | 1 | 1 | 0 | 116,64    | 26,5062  | 90,1338  | 63,6276  | 0         |
| N-acetyl-gamma-glutamyl-phosphate reductase activity             | 1 | 1 | 0 | 296,0041  | 73,0461  | 222,958  | 149,9119 | 0         |
| mannosyl-oligosaccharide 1,2-alpha-mannosidase activity          | 1 | 1 | 0 | 79,1402   | 22,9144  | 56,2258  | 33,3114  | 0         |
| GTP cyclohydrolase I activity                                    | 1 | 1 | 0 | 330,7898  | 83,8268  | 246,963  | 163,1362 | 0         |
| glycogen (starch) synthase activity                              | 1 | 1 | 0 | 906,432   | 202,082  | 704,35   | 502,268  | 0         |
| xanthine phosphoribosyltransferase activity                      | 1 | 1 | 0 | 445,6866  | 37,7716  | 407,915  | 370,1434 | 0         |
| [acyl-carrier-protein] S-malonyltransferase activity             | 1 | 0 | 1 | 10,81202  | 9,31054  | 1,50148  | 0        | 7,80906   |
| aspartate-tRNA(Asn) ligase activity                              | 1 | 1 | 0 | 2648,469  | 338,739  | 2309,73  | 1970,991 | 0         |
| protein-L-isospartate (D-aspartate) O-methyltransferase activity | 1 | 1 | 0 | 194,4853  | 42,6533  | 151,832  | 109,1787 | 0         |
| phosphatidylinositol phosphate kinase activity                   | 1 | 1 | 0 | 1341,996  | 314,386  | 1027,61  | 713,224  | 0         |
| tubulin-tyrosine ligase activity                                 | 1 | 1 | 0 | 688,384   | 125,54   | 562,844  | 437,304  | 0         |
| 3-hydroxyisobutyrate dehydrogenase activity                      | 1 | 1 | 0 | 18,77536  | 3,81716  | 14,9582  | 11,14104 | 0         |
| 1-alkyl-2-acetyl-glycerophosphocholine esterase activity         | 1 | 1 | 0 | 199,5416  | 49,9616  | 149,58   | 99,6184  | 0         |
| D-arabinose 1-dehydrogenase [NAD(P)+] activity                   | 1 | 1 | 0 | 181,4061  | 34,5081  | 146,898  | 112,3899 | 0         |
| oxygen binding                                                   | 1 | 0 | 1 | 759,008   | 615,664  | 143,344  | 0        | 472,32    |
| hydroxymethylglutaryl-CoA reductase (NADPH) activity             | 1 | 0 | 1 | 15,40613  | 12,6888  | 2,71733  | 0        | 9,97147   |
| glutamate decarboxylase activity                                 | 1 | 0 | 1 | 122,4722  | 100,501  | 21,9712  | 0        | 78,5298   |
| ureidoglycolate hydrolase activity                               | 1 | 1 | 0 | 116,9686  | 22,264   | 94,7046  | 72,4406  | 0         |
| inositol pentakisphosphate 2-kinase activity                     | 1 | 1 | 0 | 177,7499  | 48,2159  | 129,534  | 81,3181  | 0         |
| glutamate dehydrogenase (NADP+) activity                         | 1 | 1 | 0 | 305,2429  | 72,2029  | 233,04   | 160,8371 | 0         |
| glycerone kinase activity                                        | 1 | 1 | 0 | 140,5137  | 20,0647  | 120,449  | 100,3843 | 0         |
| ornithine decarboxylase activity                                 | 1 | 1 | 0 | 1179,76   | 213,969  | 965,791  | 751,822  | 0         |
| glycine hydroxymethyltransferase activity                        | 1 | 1 | 0 | 380,101   | 104,552  | 275,549  | 170,997  | 0         |
| mannan endo-1,4-beta-mannosidase activity                        | 1 | 0 | 1 | 16,434231 | 15,8021  | 0,632131 | 0        | 15,169969 |
| endo-1,4-beta-xylanase activity                                  | 1 | 0 | 1 | 19,82036  | 17,314   | 2,50636  | 0        | 14,80764  |
| dihydropteroate synthase activity                                | 1 | 1 | 0 | 153,4306  | 20,0806  | 133,35   | 113,2694 | 0         |
| nucleobase transmembrane transporter activity                    | 1 | 1 | 0 | 60,3547   | 13,8274  | 46,5273  | 32,6999  | 0         |
| cholesterol delta-isomerase activity                             | 1 | 0 | 1 | 93,0589   | 66,5686  | 26,4903  | 0        | 40,0783   |
| thiamine pyrophosphate binding                                   | 1 | 1 | 0 | 10,94671  | 2,2532   | 8,69351  | 6,44031  | 0         |
| rRNA (adenine-N6,N6-)-dimethyltransferase activity               | 1 | 1 | 0 | 89,1649   | 16,2099  | 72,955   | 56,7451  | 0         |
| tRNA dihydrouridine synthase activity                            | 1 | 1 | 0 | 74,0807   | 19,3071  | 54,7736  | 35,4665  | 0         |
| choline-phosphate cytidyltransferase activity                    | 1 | 1 | 0 | 378,4353  | 73,0313  | 305,404  | 232,3727 | 0         |
| nitronate monooxygenase activity                                 | 1 | 0 | 1 | 132,2373  | 111,918  | 20,3193  | 0        | 91,5987   |
| dihydroxy-acid dehydratase activity                              | 1 | 1 | 0 | 43,8999   | 10,5343  | 33,3656  | 22,8313  | 0         |
| translation elongation factor activity                           | 1 | 1 | 0 | 184,1311  | 41,6911  | 142,44   | 100,7489 | 0         |
| microtubule motor activity                                       | 1 | 1 | 0 | 26,73645  | 5,53535  | 21,2011  | 15,66575 | 0         |
| acetylglutamate kinase activity                                  | 1 | 1 | 0 | 296,0041  | 73,0461  | 222,958  | 149,9119 | 0         |
| arsenite transmembrane transporter activity                      | 1 | 1 | 0 | 167,448   | 17,66    | 149,788  | 132,128  | 0         |
| nitric oxide dioxygenase activity                                | 1 | 0 | 1 | 759,008   | 615,664  | 143,344  | 0        | 472,32    |
| homocitrate synthase activity                                    | 1 | 1 | 0 | 913,664   | 130,631  | 783,033  | 652,402  | 0         |
| calcium-dependent phospholipid binding                           | 1 | 1 | 0 | 101,3631  | 26,2724  | 75,0907  | 48,8183  | 0         |
| ferric-chelate reductase activity                                | 1 | 0 | 1 | 15,28263  | 13,1739  | 2,10873  | 0        | 11,06517  |
| hypoxanthine phosphoribosyltransferase activity                  | 1 | 1 | 0 | 445,6866  | 37,7716  | 407,915  | 370,1434 | 0         |
| mismatched DNA binding                                           | 1 | 1 | 0 | 72,0655   | 20,3698  | 51,6957  | 31,3259  | 0         |
| adenosylmethionine decarboxylase activity                        | 1 | 1 | 0 | 405,995   | 117,23   | 288,765  | 171,535  | 0         |
| carbamoyl-phosphate synthase (glutamine-hydrolyzing) activity    | 1 | 1 | 0 | 155,4741  | 44,7091  | 110,765  | 66,0559  | 0         |
| phospholipase A2 activity                                        | 1 | 1 | 0 | 265,3592  | 48,4362  | 216,923  | 168,4868 | 0         |
| deoxyribose-phosphate aldolase activity                          | 1 | 1 | 0 | 463,18    | 94,866   | 368,314  | 273,448  | 0         |
| cellulase activity                                               | 1 | 0 | 1 | 16,434231 | 15,8021  | 0,632131 | 0        | 15,169969 |
| galactonate dehydratase activity                                 | 1 | 1 | 0 | 43,8999   | 10,5343  | 33,3656  | 22,8313  | 0         |
| trichodiene synthase activity                                    | 1 | 1 | 0 | 9,064771  | 0,947821 | 8,11695  | 7,169129 | 0         |

## Supplementary figure 2

|                                                                             |   |   |   |           |          |         |          |         |
|-----------------------------------------------------------------------------|---|---|---|-----------|----------|---------|----------|---------|
| hydrolase activity, acting on carbon-nitrogen (but not peptide) bonds       | 1 | 1 | 0 | 107,9296  | 24,594   | 83,3356 | 58,7416  | 0       |
| hydrogen ion transporting ATP synthase activity, rotational mechanism       | 1 | 1 | 0 | 6,866202  | 0,554272 | 6,31193 | 5,757658 | 0       |
| acetate kinase activity                                                     | 1 | 1 | 0 | 111,9319  | 20,1711  | 91,7608 | 71,5897  | 0       |
| acireductone dioxygenase [iron(II)-requiring] activity                      | 1 | 1 | 0 | 448,604   | 120,241  | 328,363 | 208,122  | 0       |
| peptidase activity                                                          | 1 | 1 | 0 | 96,7693   | 17,0165  | 79,7528 | 62,7363  | 0       |
| NAD+ ADP-ribosyltransferase activity                                        | 1 | 1 | 0 | 43,3178   | 8,4762   | 34,8416 | 26,3654  | 0       |
| NAD+ kinase activity                                                        | 1 | 1 | 0 | 751,019   | 133,182  | 617,837 | 484,655  | 0       |
| 6-phosphogluconolactonase activity                                          | 1 | 1 | 0 | 1777,658  | 286,488  | 1491,17 | 1204,682 | 0       |
| glutamate-5-semialdehyde dehydrogenase activity                             | 1 | 1 | 0 | 293,9248  | 82,0008  | 211,924 | 129,9232 | 0       |
| GTPase activator activity                                                   | 1 | 1 | 0 | 92,8911   | 20,9652  | 71,9259 | 50,9607  | 0       |
| alditol:NADP+ 1-oxidoreductase activity                                     | 1 | 1 | 0 | 181,4061  | 34,5081  | 146,898 | 112,3899 | 0       |
| protein kinase activity                                                     | 1 | 1 | 0 | 97,7666   | 21,9982  | 75,7684 | 53,7702  | 0       |
| enoyl-[acyl-carrier-protein] reductase (NADH) activity                      | 1 | 0 | 1 | 10,81202  | 9,31054  | 1,50148 | 0        | 7,80906 |
| D-ribulokinase activity                                                     | 1 | 1 | 0 | 134,279   | 39,2525  | 95,0265 | 55,774   | 0       |
| phosphoribosylaminoimidazolesuccinocarboxamide synthase activity            | 1 | 1 | 0 | 260,2351  | 72,4691  | 187,766 | 115,2969 | 0       |
| dTDP-4-dehydrorhamnose reductase activity                                   | 1 | 1 | 0 | 946,136   | 227,526  | 718,61  | 491,084  | 0       |
| transition metal ion binding                                                | 1 | 1 | 0 | 66,4586   | 13,4534  | 53,0052 | 39,5518  | 0       |
| thymidine phosphorylase activity                                            | 1 | 1 | 0 | 418,96    | 112,498  | 306,462 | 193,964  | 0       |
| voltage-gated anion channel activity                                        | 1 | 1 | 0 | 643,948   | 153,247  | 490,701 | 337,454  | 0       |
| alpha,alpha-trehalose-phosphate synthase (UDP-forming) activity             | 1 | 1 | 0 | 493,8401  | 64,3841  | 429,456 | 365,0719 | 0       |
| NG-(1,2-dicarboxylethyl)AMP AMP-lyase (fumarate-forming) activity           | 1 | 1 | 0 | 9,28763   | 1,78456  | 7,50307 | 5,71851  | 0       |
| [acyl-carrier-protein] S-acetyltransferase activity                         | 1 | 0 | 1 | 10,81202  | 9,31054  | 1,50148 | 0        | 7,80906 |
| aldehyde-lyase activity                                                     | 1 | 1 | 0 | 8,32154   | 1,04318  | 7,27836 | 6,23518  | 0       |
| GMP synthase (glutamine-hydrolyzing) activity                               | 1 | 1 | 0 | 100,5129  | 27,0588  | 73,4541 | 46,3953  | 0       |
| tRNA-intron endonuclease activity                                           | 1 | 1 | 0 | 130,3955  | 31,6422  | 98,7533 | 67,1111  | 0       |
| prephenate dehydrogenase (NADP+) activity                                   | 1 | 1 | 0 | 312,2503  | 66,3023  | 245,948 | 179,6457 | 0       |
| galactose 1-dehydrogenase activity                                          | 1 | 1 | 0 | 1069,4784 | 87,3574  | 982,121 | 894,7636 | 0       |
| solute:hydrogen antiporter activity                                         | 1 | 1 | 0 | 29,50816  | 2,89286  | 26,6153 | 23,72244 | 0       |
| 3-oxoacyl-[acyl-carrier-protein] reductase (NADPH) activity                 | 1 | 1 | 0 | 2425,344  | 514,024  | 1911,32 | 1397,296 | 0       |
| inorganic anion exchanger activity                                          | 1 | 1 | 0 | 48,0802   | 12,0315  | 36,0487 | 24,0172  | 0       |
| anthranilate synthase activity                                              | 1 | 1 | 0 | 225,037   | 65,155   | 159,882 | 94,727   | 0       |
| C-4 methylsterol oxidase activity                                           | 1 | 1 | 0 | 4375,047  | 889,437  | 3485,61 | 2596,173 | 0       |
| cis-stilbene-oxide hydrolase activity                                       | 1 | 1 | 0 | 164,1984  | 33,8464  | 130,352 | 96,5056  | 0       |
| methylenetetrahydrofolate dehydrogenase (NADP+) activity                    | 1 | 1 | 0 | 253,0096  | 57,4116  | 195,598 | 138,1864 | 0       |
| ribose-phosphate 3-epimerase activity                                       | 1 | 1 | 0 | 1191,062  | 188,272  | 1002,79 | 814,518  | 0       |
| ligase activity                                                             | 1 | 0 | 1 | 15,92536  | 12,9608  | 2,96456 | 0        | 9,99624 |
| 4-alpha-hydroxytetrahydrobiopterin dehydratase activity                     | 1 | 1 | 0 | 215,8769  | 58,4749  | 157,402 | 98,9271  | 0       |
| spermidine dehydrogenase activity                                           | 1 | 1 | 0 | 69,4091   | 15,1657  | 54,2434 | 39,0777  | 0       |
| P-P-bond-hydrolysis-driven protein transmembrane transporter activity       | 1 | 1 | 0 | 100,6593  | 27,9348  | 72,7245 | 44,7897  | 0       |
| serine-type carboxypeptidase activity                                       | 1 | 0 | 1 | 178,8457  | 135,722  | 43,1237 | 0        | 92,5983 |
| 2-amino-4-hydroxy-6-hydroxymethylidihydropteridine diphosphokinase activity | 1 | 1 | 0 | 153,4306  | 20,0806  | 133,35  | 113,2694 | 0       |
| asparagine synthase (glutamine-hydrolyzing) activity                        | 1 | 1 | 0 | 34,18477  | 8,80947  | 25,3753 | 16,56583 | 0       |
| cysteine-type peptidase activity                                            | 1 | 1 | 0 | 458,48    | 126,431  | 332,049 | 205,618  | 0       |
| hydrogen ion transmembrane transporter activity                             | 1 | 1 | 0 | 35,10226  | 5,78066  | 29,3216 | 23,54094 | 0       |
| DNA ligase (ATP) activity                                                   | 1 | 1 | 0 | 107,9977  | 20,4623  | 87,5354 | 67,0731  | 0       |
| prephenate dehydrogenase activity                                           | 1 | 1 | 0 | 312,2503  | 66,3023  | 245,948 | 179,6457 | 0       |
| tryptophan-tRNA ligase activity                                             | 1 | 1 | 0 | 211,0477  | 60,3157  | 150,732 | 90,4163  | 0       |
| arylsulfatase activity                                                      | 1 | 0 | 1 | 29,0197   | 22,4186  | 6,6011  | 0        | 15,8175 |
| mannitol 2-dehydrogenase activity                                           | 1 | 1 | 0 | 2248,663  | 221,143  | 2027,52 | 1806,377 | 0       |
| CDP-diaclylglycerol-serine O-phosphatidyltransferase activity               | 1 | 1 | 0 | 72,261    | 16,6291  | 55,6319 | 39,0028  | 0       |
| fatty acid synthase activity                                                | 1 | 1 | 0 | 2425,344  | 514,024  | 1911,32 | 1397,296 | 0       |
| Rho guanyl-nucleotide exchange factor activity                              | 1 | 1 | 0 | 22,00213  | 4,98463  | 17,0175 | 12,03287 | 0       |
| serine-type endopeptidase activity                                          | 1 | 1 | 0 | 9,51581   | 1,68844  | 7,82737 | 6,13893  | 0       |
| endoribonuclease activity, producing 5'-phosphomonoesters                   | 1 | 1 | 0 | 138,4721  | 40,1068  | 98,3653 | 58,2585  | 0       |
| nucleotide-sugar transmembrane transporter activity                         | 1 | 1 | 0 | 233,7792  | 51,8072  | 181,972 | 130,1648 | 0       |
| ion channel activity                                                        | 1 | 1 | 0 | 184,2771  | 23,3181  | 160,959 | 137,6409 | 0       |
| glycerol kinase activity                                                    | 1 | 1 | 0 | 33,28393  | 3,86693  | 29,417  | 25,55007 | 0       |
| delta14-sterol reductase activity                                           | 1 | 1 | 0 | 426,5634  | 97,0284  | 329,535 | 232,5066 | 0       |

## Supplementary figure 2

|                                                           |   |   |   |          |          |         |          |          |
|-----------------------------------------------------------|---|---|---|----------|----------|---------|----------|----------|
| CTP synthase activity                                     | 1 | 1 | 0 | 384,019  | 101,776  | 282,243 | 180,467  | 0        |
| glutathione binding                                       | 1 | 1 | 0 | 2067,634 | 403,654  | 1663,98 | 1260,326 | 0        |
| purine-nucleoside phosphorylase activity                  | 1 | 1 | 0 | 418,96   | 112,498  | 306,462 | 193,964  | 0        |
| chromate transmembrane transporter activity               | 1 | 1 | 0 | 8,779909 | 0,351559 | 8,42835 | 8,076791 | 0        |
| mannitol-1-phosphate 5-dehydrogenase activity             | 1 | 1 | 0 | 5669,739 | 896,889  | 4772,85 | 3875,961 | 0        |
| alanine-glyoxylate transaminase activity                  | 1 | 1 | 0 | 373,5597 | 66,5877  | 306,972 | 240,3843 | 0        |
| asparaginase activity                                     | 1 | 1 | 0 | 408,8591 | 80,5861  | 328,273 | 247,6869 | 0        |
| phosphomevalonate kinase activity                         | 1 | 1 | 0 | 570,796  | 118,157  | 452,639 | 334,482  | 0        |
| glutathione transferase activity                          | 1 | 1 | 0 | 522,0948 | 32,1398  | 489,955 | 457,8152 | 0        |
| glutamate-cysteine ligase activity                        | 1 | 1 | 0 | 321,3172 | 74,7072  | 246,61  | 171,9028 | 0        |
| ATP adenyllyltransferase activity                         | 1 | 1 | 0 | 205,7454 | 24,9004  | 180,845 | 155,9446 | 0        |
| 1,4-alpha-glucan branching enzyme activity                | 1 | 1 | 0 | 1364,445 | 224,385  | 1140,06 | 915,675  | 0        |
| GTPase binding                                            | 1 | 1 | 0 | 36,74652 | 9,31472  | 27,4318 | 18,11708 | 0        |
| diacylglycerol kinase activity                            | 1 | 1 | 0 | 147,4849 | 41,4199  | 106,065 | 64,6451  | 0        |
| oleoyl-[acyl-carrier-protein] hydrolase activity          | 1 | 0 | 1 | 10,81202 | 9,31054  | 1,50148 | 0        | 7,80906  |
| S-adenosylmethionine-dependent methyltransferase activity | 1 | 1 | 0 | 150,0323 | 22,7793  | 127,253 | 104,4737 | 0        |
| carbonate dehydratase activity                            | 1 | 1 | 0 | 812,0701 | 92,9631  | 719,107 | 626,1439 | 0        |
| protein disulfide isomerase activity                      | 1 | 1 | 0 | 197,4522 | 25,7782  | 171,674 | 145,8958 | 0        |
| aspartate carbamoyltransferase activity                   | 1 | 1 | 0 | 155,4741 | 44,7091  | 110,765 | 66,0559  | 0        |
| arginine-tRNA ligase activity                             | 1 | 1 | 0 | 266,4799 | 67,3789  | 199,101 | 131,7221 | 0        |
| manganese ion binding                                     | 1 | 1 | 0 | 372,1113 | 89,3783  | 282,733 | 193,3547 | 0        |
| aminomethyltransferase activity                           | 1 | 1 | 0 | 233,0569 | 44,4699  | 188,587 | 144,1171 | 0        |
| acetyl-CoA carboxylase activity                           | 1 | 1 | 0 | 2425,344 | 514,024  | 1911,32 | 1397,296 | 0        |
| ribose-5-phosphate isomerase activity                     | 1 | 1 | 0 | 4231,574 | 653,194  | 3578,38 | 2925,186 | 0        |
| endoribonuclease activity                                 | 1 | 1 | 0 | 7,76699  | 7,76699  | 0       | -7,76699 | 0        |
| phosphoric diester hydrolase activity                     | 1 | 1 | 0 | 1281,2   | 279,42   | 1001,78 | 722,36   | 0        |
| epoxide hydrolase activity                                | 1 | 1 | 0 | 164,1984 | 33,8464  | 130,352 | 96,5056  | 0        |
| arsenite-transmembrane transporting ATPase activity       | 1 | 1 | 0 | 333,4289 | 97,9519  | 235,477 | 137,5251 | 0        |
| mannosyl-oligosaccharide glucosidase activity             | 1 | 1 | 0 | 698,704  | 109,905  | 588,799 | 478,894  | 0        |
| fatty-acyl-CoA synthase activity                          | 1 | 0 | 1 | 10,81202 | 9,31054  | 1,50148 | 0        | 7,80906  |
| cysteine-type endopeptidase activity                      | 1 | 1 | 0 | 244,0927 | 63,5267  | 180,566 | 117,0393 | 0        |
| proton-transporting ATPase activity, rotational mechanism | 1 | 1 | 0 | 6,866202 | 0,554272 | 6,31193 | 5,757658 | 0        |
| structural constituent of cell wall                       | 1 | 0 | 1 | 958,0631 | 929,352  | 28,7111 | 0        | 900,6409 |
| bile acid:sodium symporter activity                       | 1 | 1 | 0 | 19,92195 | 3,54095  | 16,381  | 12,84005 | 0        |
| guanyl-nucleotide exchange factor activity                | 1 | 1 | 0 | 36,74652 | 9,31472  | 27,4318 | 18,11708 | 0        |
| chitinase activity                                        | 1 | 1 | 0 | 235,0762 | 65,8482  | 169,228 | 103,3798 | 0        |
| phosphatidylcholine 1-acylhydrolase activity              | 1 | 1 | 0 | 265,3592 | 48,4362  | 216,923 | 168,4868 | 0        |
| electron-transferring-flavoprotein dehydrogenase activity | 1 | 1 | 0 | 120,046  | 32,7194  | 87,3266 | 54,6072  | 0        |
| cutinase activity                                         | 1 | 1 | 0 | 46,46418 | 9,68698  | 36,7772 | 27,09022 | 0        |

# Supplementary figure 2

## Molecular Function

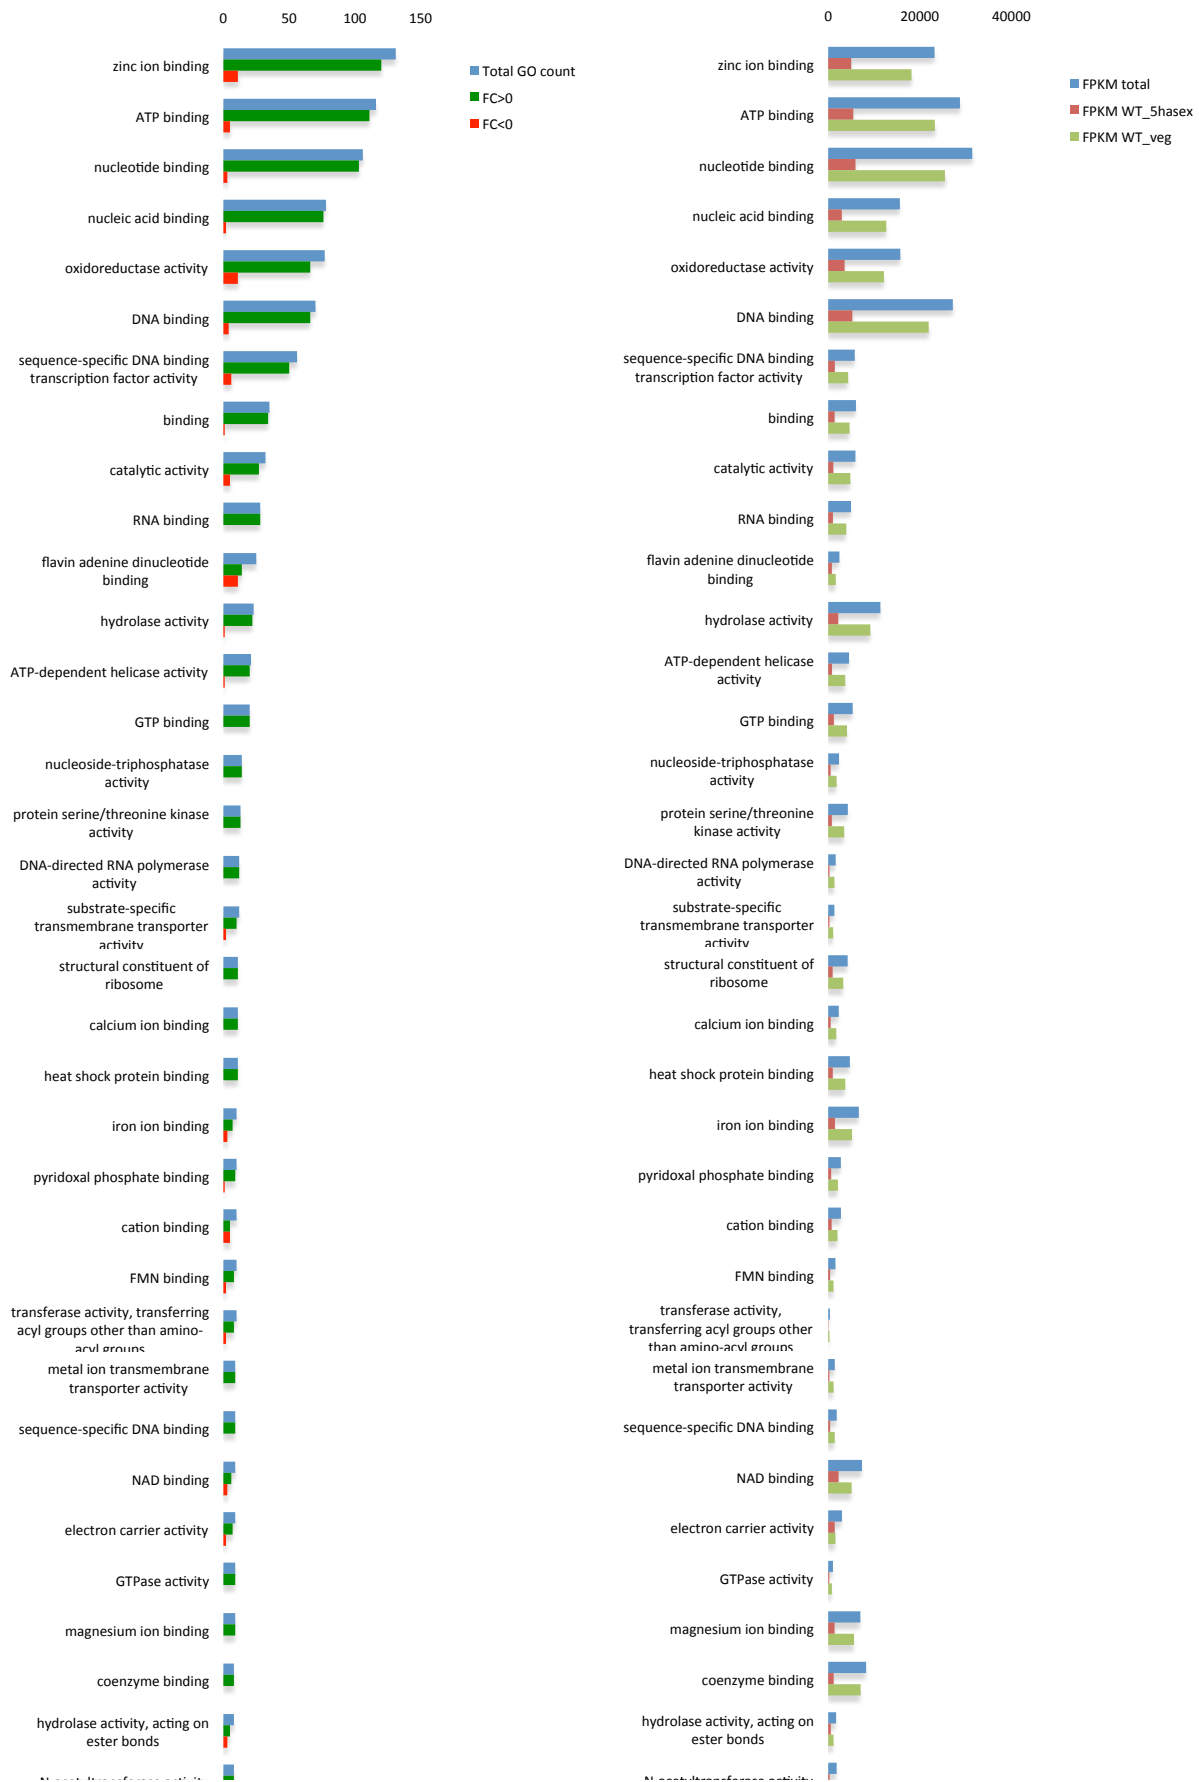



## Supplementary figure 2

### Biological process

| GO term                                                     | Total GO count | FC>0 | FC<0 | FPKM total  | FPKM WT_Shasex | FPKM WT_veg | FPKM WT_veg-WT_Shasex when FC>0 | FPKM WT_Shasex-WT_veg when FC<0 |
|-------------------------------------------------------------|----------------|------|------|-------------|----------------|-------------|---------------------------------|---------------------------------|
| oxidation-reduction process                                 | 155            | 121  | 34   | 56518,41026 | 13708,75899    | 42809,65126 | 32259,71087                     | 3158,818597                     |
| transmembrane transport                                     | 97             | 81   | 16   | 16923,98159 | 3733,475045    | 13190,50655 | 10305,68674                     | 848,655231                      |
| regulation of transcription, DNA-dependent                  | 69             | 64   | 5    | 26238,71301 | 5093,93341     | 21144,7796  | 16168,97098                     | 118,12479                       |
| metabolic process                                           | 50             | 45   | 5    | 13873,8674  | 2526,48468     | 11347,38272 | 8955,73561                      | 134,83757                       |
| transcription, DNA-dependent                                | 34             | 30   | 4    | 2870,83553  | 666,93974      | 2203,89579  | 1612,97674                      | 76,02069                        |
| translation                                                 | 24             | 24   | 0    | 8088,8676   | 1801,6738      | 6287,1938   | 4485,52                         | 0                               |
| proteolysis                                                 | 17             | 15   | 2    | 2808,874333 | 741,358243     | 2067,51609  | 1434,999317                     | 108,84147                       |
| protein phosphorylation                                     | 14             | 14   | 0    | 4385,368063 | 813,708623     | 3571,65944  | 2757,950817                     | 0                               |
| biosynthetic process                                        | 12             | 9    | 3    | 1814,842338 | 375,380772     | 1439,461566 | 1089,208918                     | 25,128124                       |
| carbohydrate metabolic process                              | 12             | 6    | 6    | 10362,9888  | 2072,30418     | 8290,68462  | 6405,97878                      | 187,59834                       |
| lipid metabolic process                                     | 10             | 9    | 1    | 3141,32757  | 730,40469      | 2410,92288  | 1708,32091                      | 27,80272                        |
| nucleobase-containing compound metabolic process            | 10             | 10   | 0    | 1742,21293  | 446,73906      | 1295,47387  | 848,73481                       | 0                               |
| metal ion transport                                         | 9              | 9    | 0    | 1439,64739  | 261,00409      | 1178,6433   | 917,63921                       | 0                               |
| intracellular protein transport                             | 9              | 8    | 1    | 6158,49469  | 1387,5529      | 4770,94179  | 3404,5492                       | 21,16031                        |
| protein folding                                             | 9              | 9    | 0    | 7570,9271   | 1699,2435      | 5871,6836   | 4172,4401                       | 0                               |
| translational initiation                                    | 8              | 8    | 0    | 2031,23687  | 511,84747      | 1519,3894   | 1007,54193                      | 0                               |
| phospholipid metabolic process                              | 8              | 8    | 0    | 2013,1459   | 412,9503       | 1600,1956   | 1187,2453                       | 0                               |
| sterol metabolic process                                    | 8              | 5    | 3    | 6459,55383  | 1565,8585      | 4893,69533  | 3508,0829                       | 180,24607                       |
| RNA processing                                              | 8              | 8    | 0    | 1224,40426  | 299,46986      | 924,9344    | 625,46454                       | 0                               |
| nucleoside metabolic process                                | 7              | 7    | 0    | 1776,37614  | 274,70884      | 1501,6673   | 1226,95846                      | 0                               |
| cellular metabolic process                                  | 7              | 7    | 0    | 663,30588   | 153,173        | 510,13288   | 356,95988                       | 0                               |
| amino acid transmembrane transport                          | 7              | 6    | 1    | 1891,90705  | 692,54185      | 1199,3652   | 790,63735                       | 283,814                         |
| fatty acid biosynthetic process                             | 6              | 4    | 2    | 7552,035487 | 1731,983627    | 5820,05186  | 4226,073593                     | 138,00536                       |
| transport                                                   | 6              | 5    | 1    | 2547,109914 | 479,21103      | 2067,898884 | 1609,31927                      | 20,631416                       |
| histidine metabolic process                                 | 6              | 6    | 0    | 1422,96679  | 261,88539      | 1161,0814   | 899,19601                       | 0                               |
| ribosome biogenesis                                         | 6              | 6    | 0    | 2386,71256  | 420,02716      | 1966,6854   | 1546,65824                      | 0                               |
| arginine metabolic process                                  | 6              | 6    | 0    | 2933,2743   | 693,8379       | 2239,4364   | 1545,5985                       | 0                               |
| rRNA processing                                             | 6              | 6    | 0    | 718,5167    | 128,5077       | 590,009     | 461,5013                        | 0                               |
| cellular amino acid metabolic process                       | 6              | 4    | 2    | 1566,17881  | 642,9014       | 923,27741   | 627,9201                        | 347,54409                       |
| ubiquitin-dependent protein catabolic process               | 5              | 5    | 0    | 576,63331   | 119,56651      | 457,0668    | 337,50029                       | 0                               |
| small GTPase mediated signal transduction                   | 5              | 5    | 0    | 3531,2182   | 957,0428       | 2574,1754   | 1617,1326                       | 0                               |
| GTP catabolic process                                       | 5              | 5    | 0    | 2702,71121  | 713,12431      | 1989,5869   | 1276,46259                      | 0                               |
| DNA repair                                                  | 4              | 4    | 0    | 347,04726   | 76,19326       | 270,854     | 194,66074                       | 0                               |
| pentose-phosphate shunt                                     | 4              | 4    | 0    | 3050,24456  | 494,40776      | 2555,8368   | 2061,42904                      | 0                               |
| mannitol metabolic process                                  | 4              | 4    | 0    | 10609,3507  | 1758,652       | 8850,6987   | 7092,0467                       | 0                               |
| post-translational protein modification                     | 4              | 4    | 0    | 2836,51144  | 720,11954      | 2116,3919   | 1396,27236                      | 0                               |
| two-component signal transduction system (phosphorelay)     | 4              | 4    | 0    | 1739,6256   | 344,2486       | 1395,377    | 1051,1284                       | 0                               |
| nucleotide salvage                                          | 4              | 4    | 0    | 1147,85987  | 209,92827      | 937,9316    | 728,00333                       | 0                               |
| ATP biosynthetic process                                    | 4              | 3    | 1    | 471,79768   | 126,1333       | 345,66438   | 233,6416                        | 14,11052                        |
| alcohol metabolic process                                   | 4              | 4    | 0    | 211,62      | 181,62675      | 29,99325    | 0                               | 151,6335                        |
| peptidyl-histidine phosphorylation                          | 4              | 4    | 0    | 1739,6256   | 344,2486       | 1395,377    | 1051,1284                       | 0                               |
| regulation of transcription from RNA polymerase II promoter | 4              | 3    | 1    | 455,78806   | 132,09141      | 323,69665   | 211,22832                       | 19,62308                        |
| cellular process                                            | 3              | 3    | 0    | 601,3921    | 149,2957       | 452,0964    | 302,8007                        | 0                               |
| phospholipid biosynthetic process                           | 3              | 3    | 0    | 539,6348    | 83,6068        | 456,028     | 372,4212                        | 0                               |
| transcription initiation, DNA-dependent                     | 3              | 3    | 0    | 564,3968    | 139,3631       | 425,0337    | 285,6706                        | 0                               |
| tRNA aminoacylation for protein translation                 | 3              | 3    | 0    | 3125,9966   | 466,4336       | 2659,563    | 2193,1294                       | 0                               |
| intracellular signal transduction                           | 3              | 3    | 0    | 105,92569   | 23,24009       | 82,6856     | 59,44551                        | 0                               |
| RNA metabolic process                                       | 3              | 3    | 0    | 1181,69248  | 261,60128      | 920,0912    | 658,48992                       | 0                               |
| arginine biosynthetic process                               | 3              | 3    | 0    | 1332,5412   | 348,0792       | 984,462     | 636,3828                        | 0                               |
| cation transport                                            | 3              | 3    | 0    | 190,38886   | 44,56006       | 145,8288    | 101,26874                       | 0                               |
| protein ubiquitination                                      | 3              | 3    | 0    | 432,48268   | 98,34208       | 334,1406    | 235,79852                       | 0                               |
| RNA-dependent DNA replication                               | 3              | 3    | 0    | 36,85045    | 6,25327        | 30,59718    | 24,34391                        | 0                               |
| DNA recombination                                           | 3              | 2    | 1    | 298,17744   | 68,07181       | 230,10563   | 168,8467                        | 6,81288                         |
| nucleosome assembly                                         | 3              | 3    | 0    | 3822,74     | 818,056        | 3004,684    | 2186,628                        | 0                               |
| D-gluconate metabolic process                               | 3              | 3    | 0    | 2506,448    | 403,239        | 2103,209    | 1699,97                         | 0                               |
| protein transport                                           | 3              | 3    | 0    | 814,7478    | 221,2804       | 593,4674    | 372,187                         | 0                               |

## Supplementary figure 2

|                                                                                       |   |   |   |            |           |           |           |           |
|---------------------------------------------------------------------------------------|---|---|---|------------|-----------|-----------|-----------|-----------|
| amine metabolic process                                                               | 3 | 3 | 0 | 237,20849  | 58,92019  | 178,2883  | 119,36811 | 0         |
| cell redox homeostasis                                                                | 3 | 3 | 0 | 1000,4737  | 237,4177  | 763,056   | 525,6383  | 0         |
| glutamine family amino acid metabolic process                                         | 3 | 2 | 1 | 420,83649  | 116,5997  | 304,23679 | 202,9669  | 15,32981  |
| galactonate metabolic process                                                         | 2 | 2 | 0 | 1113,3783  | 97,8917   | 1015,4866 | 917,5949  | 0         |
| xylulose metabolic process                                                            | 2 | 2 | 0 | 2690,9487  | 640,62    | 2050,3287 | 1409,7087 | 0         |
| trehalose biosynthetic process                                                        | 2 | 2 | 0 | 2181,3501  | 285,5241  | 1895,826  | 1610,3019 | 0         |
| nucleotide catabolic process                                                          | 2 | 2 | 0 | 283,21327  | 59,65867  | 223,5546  | 163,89593 | 0         |
| glutamate decarboxylation to succinate                                                | 2 | 1 | 1 | 747,1512   | 215,744   | 531,4072  | 394,193   | 78,5298   |
| protein dephosphorylation                                                             | 2 | 2 | 0 | 247,18922  | 62,16572  | 185,0235  | 122,85778 | 0         |
| apoptotic process                                                                     | 2 | 2 | 0 | 79,06677   | 9,56567   | 69,5011   | 59,93543  | 0         |
| glycerol metabolic process                                                            | 2 | 2 | 0 | 173,79763  | 23,93163  | 149,866   | 125,93437 | 0         |
| lipoate biosynthetic process                                                          | 2 | 2 | 0 | 426,1497   | 110,5117  | 315,638   | 205,1263  | 0         |
| response to stress                                                                    | 2 | 2 | 0 | 165,60482  | 40,20522  | 125,3996  | 85,19438  | 0         |
| cellular response to calcium ion                                                      | 2 | 2 | 0 | 4471,799   | 715,149   | 3756,65   | 3041,501  | 0         |
| anion transport                                                                       | 2 | 2 | 0 | 692,0282   | 165,2785  | 526,7497  | 361,4712  | 0         |
| DNA-dependent DNA replication initiation                                              | 2 | 2 | 0 | 129,9482   | 34,5429   | 95,4053   | 60,8624   | 0         |
| carbon utilization                                                                    | 2 | 2 | 0 | 1051,996   | 156,792   | 895,204   | 738,412   | 0         |
| sporocarp development involved in asexual reproduction                                | 2 | 2 | 2 | 228,66436  | 213,6917  | 14,97266  | 0         | 198,71904 |
| carboxylic acid metabolic process                                                     | 2 | 2 | 0 | 339,6699   | 88,3599   | 251,31    | 162,9501  | 0         |
| mRNA processing                                                                       | 2 | 2 | 0 | 260,5699   | 72,7054   | 187,8645  | 115,1591  | 0         |
| protein modification process                                                          | 2 | 2 | 0 | 882,8693   | 168,1933  | 714,676   | 546,4827  | 0         |
| SRP-dependent cotranslational protein targeting to membrane                           | 2 | 2 | 0 | 122,98119  | 17,30679  | 105,6744  | 88,36761  | 0         |
| regulation of cyclin-dependent protein kinase activity                                | 2 | 2 | 0 | 581,0842   | 114,0822  | 467,002   | 352,9198  | 0         |
| GPI anchor metabolic process                                                          | 2 | 1 | 1 | 130,11129  | 49,0105   | 81,10079  | 53,2506   | 21,16031  |
| isoprenoid biosynthetic process                                                       | 2 | 1 | 1 | 237,75713  | 55,1558   | 182,60133 | 137,417   | 9,97147   |
| tricarboxylic acid cycle                                                              | 2 | 2 | 0 | 1191,208   | 321,058   | 870,15    | 549,092   | 0         |
| microtubule-based movement                                                            | 2 | 2 | 0 | 129,51841  | 18,68291  | 110,8355  | 92,15259  | 0         |
| aromatic amino acid family biosynthetic process                                       | 2 | 2 | 0 | 537,2873   | 131,4573  | 405,83    | 274,3727  | 0         |
| cellular response to osmotic stress                                                   | 2 | 2 | 0 | 830,1207   | 210,6637  | 619,457   | 408,7933  | 0         |
| snRNA pseudouridine synthesis                                                         | 2 | 2 | 0 | 1119,64676 | 233,19096 | 886,4558  | 653,26484 | 0         |
| generation of precursor metabolites and energy                                        | 2 | 1 | 1 | 310,91698  | 84,4661   | 226,45088 | 156,0953  | 14,11052  |
| pathogenesis                                                                          | 2 | 2 | 0 | 3149,1917  | 546,3217  | 2602,87   | 2056,5483 | 0         |
| cell cycle                                                                            | 2 | 2 | 0 | 337,2103   | 66,8452   | 270,3651  | 203,5199  | 0         |
| protein polymerization                                                                | 2 | 2 | 0 | 129,51841  | 18,68291  | 110,8355  | 92,15259  | 0         |
| mitosis                                                                               | 2 | 2 | 0 | 683,5261   | 163,3141  | 520,212   | 356,8979  | 0         |
| cellular carbohydrate catabolic process                                               | 2 | 1 | 1 | 82,75616   | 43,38098  | 39,37518  | 27,09022  | 31,09602  |
| positive regulation of conidium formation                                             | 2 | 1 | 1 | 41,15106   | 26,75941  | 14,39165  | 7,25532   | 19,62308  |
| ribonucleoside monophosphate biosynthetic process                                     | 2 | 2 | 0 | 845,5296   | 150,7666  | 694,763   | 543,9964  | 0         |
| galactose metabolic process                                                           | 2 | 2 | 0 | 313,1346   | 64,9006   | 248,234   | 183,3334  | 0         |
| defense response                                                                      | 2 | 1 | 1 | 92,68666   | 36,48868  | 56,19798  | 47,51202  | 27,80272  |
| glycogen biosynthetic process                                                         | 2 | 2 | 0 | 1342,3923  | 283,7453  | 1058,647  | 774,9017  | 0         |
| transcription initiation from RNA polymerase II promoter                              | 2 | 2 | 0 | 499,6496   | 94,8986   | 404,751   | 309,8524  | 0         |
| tRNA methylation                                                                      | 2 | 2 | 0 | 110,47359  | 24,25619  | 86,2174   | 61,96121  | 0         |
| pseudouridine synthesis                                                               | 2 | 2 | 0 | 158,7621   | 36,663    | 122,0991  | 85,4361   | 0         |
| folic acid biosynthetic process                                                       | 2 | 2 | 0 | 484,2204   | 103,9074  | 380,313   | 276,4056  | 0         |
| nuclear mRNA splicing, via spliceosome                                                | 2 | 2 | 0 | 366,2051   | 95,8044   | 270,4007  | 174,5963  | 0         |
| iron-sulfur cluster assembly                                                          | 2 | 2 | 0 | 2370,306   | 445,35    | 1924,956  | 1479,606  | 0         |
| positive regulation of asexual sporulation resulting in formation of a cellular spore | 2 | 1 | 1 | 41,15106   | 26,75941  | 14,39165  | 7,25532   | 19,62308  |
| positive regulation of transcription from RNA polymerase II promoter                  | 1 | 1 | 0 | 239,9259   | 63,8289   | 176,097   | 112,2681  | 0         |
| chromatin silencing                                                                   | 1 | 1 | 0 | 134,9534   | 37,7043   | 97,2491   | 59,5448   | 0         |
| response to toxin                                                                     | 1 | 1 | 0 | 164,1984   | 33,8464   | 130,352   | 96,5056   | 0         |
| allantoin catabolic process                                                           | 1 | 1 | 0 | 116,9686   | 22,264    | 94,7046   | 72,4406   | 0         |
| response to zinc ion                                                                  | 1 | 1 | 1 | 88,80044   | 83,3527   | 5,44774   | 0         | 77,90496  |
| ATP hydrolysis coupled proton transport                                               | 1 | 1 | 0 | 35,10226   | 5,78066   | 29,3216   | 23,54094  | 0         |
| proline metabolic process                                                             | 1 | 1 | 0 | 293,9248   | 82,0008   | 211,924   | 129,9232  | 0         |
| unidimensional cell growth                                                            | 1 | 1 | 0 | 2906,697   | 483,417   | 2423,28   | 1939,863  | 0         |
| glycolysis                                                                            | 1 | 1 | 0 | 572,086    | 129,72    | 442,366   | 312,646   | 0         |
| tRNA 5'-leader removal                                                                | 1 | 1 | 0 | 27,02292   | 6,67442   | 20,3485   | 13,67408  | 0         |

## Supplementary figure 2

|                                                       |   |   |          |          |          |         |          |
|-------------------------------------------------------|---|---|----------|----------|----------|---------|----------|
| cellular response to iron ion starvation              | 1 | 1 | 15,28263 | 13,1739  | 2,10873  | 0       | 11,06517 |
| phosphatidylinositol metabolic process                | 1 | 1 | 0        | 1341,996 | 314,386  | 1027,61 | 713,224  |
| phosphate ion transport                               | 1 | 1 | 0        | 4,610091 | 0,407641 | 4,20245 | 3,794809 |
| histone lysine methylation                            | 1 | 1 | 0        | 23,20958 | 3,61888  | 19,5907 | 15,97182 |
| protein deacetylation                                 | 1 | 1 | 0        | 134,9534 | 37,7043  | 97,2491 | 59,5448  |
| peroxisome fission                                    | 1 | 1 | 0        | 34,77968 | 7,00878  | 27,7709 | 20,76212 |
| positive regulation of phialide development           | 1 | 1 | 0        | 10,33274 | 1,53871  | 8,79403 | 7,25532  |
| extracellular polysaccharide biosynthetic process     | 1 | 1 | 0        | 946,136  | 227,526  | 718,61  | 491,084  |
| cellular response to hypoxia                          | 1 | 1 | 0        | 242,4947 | 62,9047  | 179,59  | 116,6853 |
| cleistothecium development                            | 1 | 1 | 0        | 225,037  | 65,155   | 159,882 | 94,727   |
| cellular response to nitrosative stress               | 1 | 1 | 1        | 759,008  | 615,664  | 143,344 | 0        |
| regulation of translational fidelity                  | 1 | 1 | 0        | 129,9907 | 33,6917  | 96,299  | 62,6073  |
| calcium ion homeostasis                               | 1 | 1 | 0        | 1565,102 | 231,732  | 1333,37 | 1101,638 |
| CDP-diacylglycerol metabolic process                  | 1 | 1 | 0        | 772,136  | 153,961  | 618,175 | 464,214  |
| detoxification of arsenic-containing substance        | 1 | 1 | 0        | 333,4289 | 97,9519  | 235,477 | 137,5251 |
| cysteine biosynthetic process                         | 1 | 1 | 0        | 794,3262 | 96,3152  | 698,011 | 601,6958 |
| phosphorylation                                       | 1 | 1 | 0        | 111,9319 | 20,1711  | 91,7608 | 71,5897  |
| nucleobase transport                                  | 1 | 1 | 0        | 60,3547  | 13,8274  | 46,5273 | 32,6999  |
| aspartyl-tRNA aminoacylation                          | 1 | 1 | 0        | 2648,469 | 338,739  | 2309,73 | 1970,991 |
| oligosaccharide metabolic process                     | 1 | 1 | 0        | 698,704  | 109,905  | 588,799 | 478,894  |
| rRNA catabolic process                                | 1 | 1 | 0        | 129,535  | 26,363   | 103,172 | 76,809   |
| regulation of protein complex assembly                | 1 | 1 | 0        | 11,96803 | 2,51575  | 9,45228 | 6,93653  |
| NAD biosynthetic process                              | 1 | 1 | 0        | 149,7756 | 39,3856  | 110,39  | 71,0044  |
| ER-dependent peroxisome organization                  | 1 | 1 | 0        | 261,008  | 34,163   | 226,845 | 192,682  |
| glutathione biosynthetic process                      | 1 | 1 | 0        | 321,3172 | 74,7072  | 246,61  | 171,9028 |
| RNA splicing                                          | 1 | 1 | 0        | 134,0732 | 21,8062  | 112,267 | 90,4608  |
| glutamine metabolic process                           | 1 | 1 | 0        | 100,5129 | 27,0588  | 73,4541 | 46,3953  |
| conidium formation                                    | 1 | 1 | 0        | 2906,697 | 483,417  | 2423,28 | 1939,863 |
| calcium ion transmembrane transport                   | 1 | 1 | 1        | 17,69828 | 15,9044  | 1,79388 | 0        |
| tetrahydrofolate biosynthetic process                 | 1 | 1 | 0        | 330,7898 | 83,8268  | 246,963 | 163,1362 |
| mitochondrial tyrosyl-tRNA aminoacylation             | 1 | 1 | 0        | 170,405  | 40,415   | 129,99  | 89,575   |
| tetrose metabolic process                             | 1 | 1 | 0        | 181,4061 | 34,5081  | 146,898 | 112,3899 |
| cellular response to oxidative stress                 | 1 | 1 | 0        | 5669,739 | 896,889  | 4772,85 | 3875,961 |
| pyrimidine nucleotide biosynthetic process            | 1 | 1 | 0        | 384,019  | 101,776  | 282,243 | 180,467  |
| positive regulation of translation                    | 1 | 1 | 0        | 137,3445 | 22,6795  | 114,665 | 91,9855  |
| deoxyribonucleotide catabolic process                 | 1 | 1 | 0        | 463,18   | 94,866   | 368,314 | 273,448  |
| protein catabolic process                             | 1 | 1 | 0        | 45,0632  | 12,6599  | 32,4033 | 19,7434  |
| alkaloid biosynthetic process                         | 1 | 1 | 1        | 30,81832 | 25,2207  | 5,59762 | 0        |
| one-carbon metabolic process                          | 1 | 1 | 0        | 253,0096 | 57,4116  | 195,598 | 138,1864 |
| cytidine deamination                                  | 1 | 1 | 0        | 440,5929 | 94,2479  | 346,345 | 252,0971 |
| dephosphorylation                                     | 1 | 1 | 0        | 164,011  | 32,536   | 131,475 | 98,939   |
| starch metabolic process                              | 1 | 1 | 0        | 1364,445 | 224,385  | 1140,06 | 915,675  |
| spermidine biosynthetic process                       | 1 | 1 | 0        | 405,995  | 117,23   | 288,765 | 171,535  |
| arginyl-tRNA aminoacylation                           | 1 | 1 | 0        | 266,4799 | 67,3789  | 199,101 | 131,7221 |
| transcription termination, DNA-dependent              | 1 | 1 | 0        | 154,9646 | 39,0196  | 115,945 | 76,9254  |
| autolysis                                             | 1 | 1 | 1        | 30,81832 | 25,2207  | 5,59762 | 0        |
| tRNA-type intron splice site recognition and cleavage | 1 | 1 | 0        | 130,3955 | 31,6422  | 98,7533 | 67,1111  |
| spore germination                                     | 1 | 1 | 0        | 2906,697 | 483,417  | 2423,28 | 1939,863 |
| branched chain family amino acid biosynthetic process | 1 | 1 | 0        | 43,8999  | 10,5343  | 33,3656 | 22,8313  |
| sesquiterpenoid biosynthetic process                  | 1 | 1 | 0        | 9,064771 | 0,947821 | 8,11695 | 7,169129 |
| DNA replication                                       | 1 | 1 | 0        | 107,9977 | 20,4623  | 87,5354 | 67,0731  |
| gene silencing                                        | 1 | 1 | 0        | 138,4245 | 19,0115  | 119,413 | 100,4015 |
| cell wall macromolecule catabolic process             | 1 | 1 | 1        | 36,29198 | 33,694   | 2,59798 | 0        |
| nucleocytoplasmic transport                           | 1 | 1 | 0        | 2263,224 | 610,514  | 1652,71 | 1042,196 |
| oxygen transport                                      | 1 | 1 | 1        | 759,008  | 615,664  | 143,344 | 0        |
| positive regulation of GTPase activity                | 1 | 1 | 0        | 92,8911  | 20,9652  | 71,9259 | 50,9607  |
| water transport                                       | 1 | 1 | 0        | 737,7734 | 59,6204  | 678,153 | 618,5326 |
| cell proliferation                                    | 1 | 1 | 0        | 211,0069 | 29,5009  | 181,506 | 152,0051 |

## Supplementary figure 2

|                                                                                      |   |   |   |           |          |          |          |           |
|--------------------------------------------------------------------------------------|---|---|---|-----------|----------|----------|----------|-----------|
| coenzyme M biosynthetic process                                                      | 1 | 1 | 0 | 152,8532  | 29,8862  | 122,967  | 93,0808  | 0         |
| tetrahydrobiopterin biosynthetic process                                             | 1 | 1 | 0 | 215,8769  | 58,4749  | 157,402  | 98,9271  | 0         |
| valine metabolic process                                                             | 1 | 1 | 0 | 18,77536  | 3,81716  | 14,9582  | 11,14104 | 0         |
| DNA ligation involved in DNA repair                                                  | 1 | 1 | 0 | 107,9977  | 20,4623  | 87,5354  | 67,0731  | 0         |
| sterigmatocystin biosynthetic process                                                | 1 | 1 | 1 | 759,008   | 615,664  | 143,344  | 0        | 472,32    |
| glycine catabolic process                                                            | 1 | 1 | 0 | 233,0569  | 44,4699  | 188,587  | 144,1171 | 0         |
| C-terminal protein methylation                                                       | 1 | 1 | 1 | 258,6519  | 218,356  | 40,2959  | 0        | 178,0601  |
| glutamyl-tRNA aminoacylation                                                         | 1 | 1 | 0 | 271,3939  | 77,3139  | 194,08   | 116,7661 | 0         |
| purine ribonucleoside monophosphate biosynthetic process                             | 1 | 1 | 0 | 116,64    | 26,5062  | 90,1338  | 63,6276  | 0         |
| response to wounding                                                                 | 1 | 1 | 0 | 11700,66  | 1267,06  | 10433,6  | 9166,54  | 0         |
| coenzyme A metabolic process                                                         | 1 | 1 | 1 | 15,40613  | 12,6888  | 2,71733  | 0        | 9,97147   |
| sulfite transport                                                                    | 1 | 1 | 0 | 151,191   | 28,035   | 123,156  | 95,121   | 0         |
| base-excision repair                                                                 | 1 | 1 | 0 | 118,5643  | 17,2573  | 101,307  | 84,0497  | 0         |
| folic acid-containing compound metabolic process                                     | 1 | 1 | 0 | 231,8518  | 64,1858  | 167,666  | 103,4802 | 0         |
| GMP biosynthetic process                                                             | 1 | 1 | 0 | 100,5129  | 27,0588  | 73,4541  | 46,3953  | 0         |
| Golgi vesicle transport                                                              | 1 | 1 | 0 | 156,5244  | 43,2124  | 113,312  | 70,0996  | 0         |
| protein import into peroxisome membrane                                              | 1 | 1 | 0 | 261,008   | 34,163   | 226,845  | 192,682  | 0         |
| calcium-mediated signaling                                                           | 1 | 1 | 0 | 1565,102  | 231,732  | 1333,37  | 1101,638 | 0         |
| L-serine metabolic process                                                           | 1 | 1 | 0 | 380,101   | 104,552  | 275,549  | 170,997  | 0         |
| peptidyl-lysine oxidation                                                            | 1 | 1 | 0 | 106,2072  | 30,0374  | 76,1698  | 46,1324  | 0         |
| glycerol-3-phosphate metabolic process                                               | 1 | 1 | 0 | 33,28393  | 3,86693  | 29,417   | 25,55007 | 0         |
| spermatogenesis                                                                      | 1 | 1 | 0 | 615,814   | 123,42   | 492,394  | 368,974  | 0         |
| asparagine biosynthetic process                                                      | 1 | 1 | 0 | 34,18477  | 8,80947  | 25,3753  | 16,56583 | 0         |
| protein arginylation                                                                 | 1 | 1 | 0 | 159,482   | 39,807   | 119,675  | 79,868   | 0         |
| rRNA modification                                                                    | 1 | 1 | 0 | 89,1649   | 16,2099  | 72,955   | 56,7451  | 0         |
| lipid glycosylation                                                                  | 1 | 1 | 0 | 223,8995  | 51,4035  | 172,496  | 121,0925 | 0         |
| regulation of small GTPase mediated signal transduction                              | 1 | 1 | 0 | 92,8911   | 20,9652  | 71,9259  | 50,9607  | 0         |
| translational termination                                                            | 1 | 1 | 0 | 341,0282  | 92,4362  | 248,592  | 156,1558 | 0         |
| Mo-molybdopterin cofactor biosynthetic process                                       | 1 | 1 | 0 | 11,15911  | 2,08378  | 9,07533  | 6,99155  | 0         |
| purine base biosynthetic process                                                     | 1 | 1 | 0 | 432,4618  | 43,5378  | 388,924  | 345,3862 | 0         |
| sexual sporulation resulting in formation of a cellular spore                        | 1 | 1 | 1 | 197,84604 | 188,471  | 9,37504  | 0        | 179,09596 |
| negative regulation of sexual sporulation resulting in formation of a cellular spore | 1 | 1 | 1 | 759,008   | 615,664  | 143,344  | 0        | 472,32    |
| Group I intron splicing                                                              | 1 | 1 | 0 | 170,405   | 40,415   | 129,99   | 89,575   | 0         |
| arabinose metabolic process                                                          | 1 | 1 | 0 | 181,4061  | 34,5081  | 146,898  | 112,3899 | 0         |
| acetate metabolic process                                                            | 1 | 1 | 0 | 111,9319  | 20,1711  | 91,7608  | 71,5897  | 0         |
| nucleotide metabolic process                                                         | 1 | 1 | 0 | 357,5871  | 91,8931  | 265,694  | 173,8009 | 0         |
| xylan catabolic process                                                              | 1 | 1 | 1 | 19,82036  | 17,314   | 2,50636  | 0        | 14,80764  |
| sodium ion transport                                                                 | 1 | 1 | 0 | 19,92195  | 3,54095  | 16,381   | 12,84005 | 0         |
| carbohydrate phosphorylation                                                         | 1 | 1 | 0 | 134,279   | 39,2525  | 95,0265  | 55,774   | 0         |
| protein exit from endoplasmic reticulum                                              | 1 | 1 | 0 | 261,008   | 34,163   | 226,845  | 192,682  | 0         |
| tRNA processing                                                                      | 1 | 1 | 0 | 732,653   | 144,838  | 587,815  | 442,977  | 0         |
| cellular response to heat                                                            | 1 | 1 | 0 | 5669,739  | 896,889  | 4772,85  | 3875,961 | 0         |
| peptidoglycan catabolic process                                                      | 1 | 1 | 1 | 36,29198  | 33,694   | 2,59798  | 0        | 31,09602  |
| gluconeogenesis                                                                      | 1 | 1 | 0 | 572,086   | 129,72   | 442,366  | 312,646  | 0         |
| ATP synthesis coupled proton transport                                               | 1 | 1 | 0 | 6,866202  | 0,554272 | 6,31193  | 5,757658 | 0         |
| glutamate catabolic process to 2-oxoglutarate                                        | 1 | 1 | 0 | 305,2429  | 72,2029  | 233,04   | 160,8371 | 0         |
| regulation of nuclear division                                                       | 1 | 1 | 0 | 58,2275   | 14,0808  | 44,1467  | 30,0659  | 0         |
| pyruvate metabolic process                                                           | 1 | 1 | 0 | 913,664   | 130,631  | 783,033  | 652,402  | 0         |
| lipid catabolic process                                                              | 1 | 1 | 0 | 199,5416  | 49,9616  | 149,58   | 99,6184  | 0         |
| signal transduction                                                                  | 1 | 1 | 0 | 61,7747   | 16,0078  | 45,7669  | 29,7591  | 0         |
| regulation of anion transport                                                        | 1 | 1 | 0 | 643,948   | 153,247  | 490,701  | 337,454  | 0         |
| proline biosynthetic process                                                         | 1 | 1 | 0 | 293,9248  | 82,0008  | 211,924  | 129,9232 | 0         |
| glycerolipid metabolic process                                                       | 1 | 1 | 0 | 522,567   | 123,472  | 399,095  | 275,623  | 0         |
| phenol-containing compound metabolic process                                         | 1 | 1 | 1 | 29,0197   | 22,4186  | 6,6011   | 0        | 15,8175   |
| response to heat                                                                     | 1 | 1 | 0 | 211,6397  | 58,7977  | 152,842  | 94,0443  | 0         |
| acetate catabolic process                                                            | 1 | 1 | 0 | 239,9259  | 63,8289  | 176,097  | 112,2681 | 0         |
| substituted mannan metabolic process                                                 | 1 | 1 | 1 | 16,434231 | 15,8021  | 0,632131 | 0        | 15,169969 |
| glycine metabolic process                                                            | 1 | 1 | 0 | 380,101   | 104,552  | 275,549  | 170,997  | 0         |

## Supplementary figure 2

|                                                                                         |   |   |   |           |          |         |          |           |
|-----------------------------------------------------------------------------------------|---|---|---|-----------|----------|---------|----------|-----------|
| chitin catabolic process                                                                | 1 | 1 | 0 | 235,0762  | 65,8482  | 169,228 | 103,3798 | 0         |
| ribosome assembly                                                                       | 1 | 1 | 0 | 208,2614  | 41,2094  | 167,052 | 125,8426 | 0         |
| chromate transport                                                                      | 1 | 1 | 0 | 8,779909  | 0,351559 | 8,42835 | 8,076791 | 0         |
| ubiquinone biosynthetic process                                                         | 1 | 1 | 0 | 25,6461   | 4,292    | 21,3541 | 17,0621  | 0         |
| regulation of Rho protein signal transduction                                           | 1 | 1 | 0 | 22,00213  | 4,98463  | 17,0175 | 12,03287 | 0         |
| cell communication                                                                      | 1 | 1 | 0 | 812,177   | 125,892  | 686,285 | 560,393  | 0         |
| nucleotide biosynthetic process                                                         | 1 | 1 | 0 | 279,3038  | 67,4638  | 211,84  | 144,3762 | 0         |
| secondary metabolic process                                                             | 1 | 1 | 0 | 61,2498   | 15,4699  | 45,7799 | 30,31    | 0         |
| asparagine metabolic process                                                            | 1 | 1 | 0 | 408,8591  | 80,5861  | 328,273 | 247,6869 | 0         |
| phialide development                                                                    | 1 |   | 1 | 197,84604 | 188,471  | 9,37504 | 0        | 179,09596 |
| calcium ion transport                                                                   | 1 | 1 | 0 | 293,2187  | 68,5617  | 224,657 | 156,0953 | 0         |
| oxalate metabolic process                                                               | 1 |   | 1 | 47,89388  | 41,8618  | 6,03208 | 0        | 35,82972  |
| spermine biosynthetic process                                                           | 1 | 1 | 0 | 405,995   | 117,23   | 288,765 | 171,535  | 0         |
| nucleotide-sugar transport                                                              | 1 | 1 | 0 | 233,7792  | 51,8072  | 181,972 | 130,1648 | 0         |
| positive regulation of autophagy                                                        | 1 | 1 | 0 | 177,3647  | 46,1147  | 131,25  | 85,1353  | 0         |
| glycerol ether metabolic process                                                        | 1 | 1 | 0 | 197,4522  | 25,7782  | 171,674 | 145,8958 | 0         |
| carbohydrate catabolic process                                                          | 1 |   | 1 | 18,43937  | 16,9477  | 1,49167 | 0        | 15,45603  |
| fungus-type cell wall organization                                                      | 1 |   | 1 | 155,7981  | 114,315  | 41,4831 | 0        | 72,8319   |
| ER to Golgi vesicle-mediated transport                                                  | 1 | 1 | 0 | 273,2399  | 60,4459  | 212,794 | 152,3481 | 0         |
| mannitol biosynthetic process                                                           | 1 | 1 | 0 | 5669,739  | 896,889  | 4772,85 | 3875,961 | 0         |
| peptide cross-linking                                                                   | 1 | 1 | 0 | 106,2072  | 30,0374  | 76,1698 | 46,1324  | 0         |
| double-strand break repair                                                              | 1 | 1 | 0 | 180,6224  | 39,4244  | 141,198 | 101,7736 | 0         |
| nitrogen compound metabolic process                                                     | 1 | 1 | 0 | 305,2429  | 72,2029  | 233,04  | 160,8371 | 0         |
| tyrosine biosynthetic process                                                           | 1 | 1 | 0 | 312,2503  | 66,3023  | 245,948 | 179,6457 | 0         |
| electron transport chain                                                                | 1 | 1 | 0 | 358,649   | 104,544  | 254,105 | 149,561  | 0         |
| activation of protein kinase C activity by G-protein coupled receptor protein signaling | 1 | 1 | 0 | 147,4849  | 41,4199  | 106,065 | 64,6451  | 0         |

# Supplementary figure 2

## Biological process

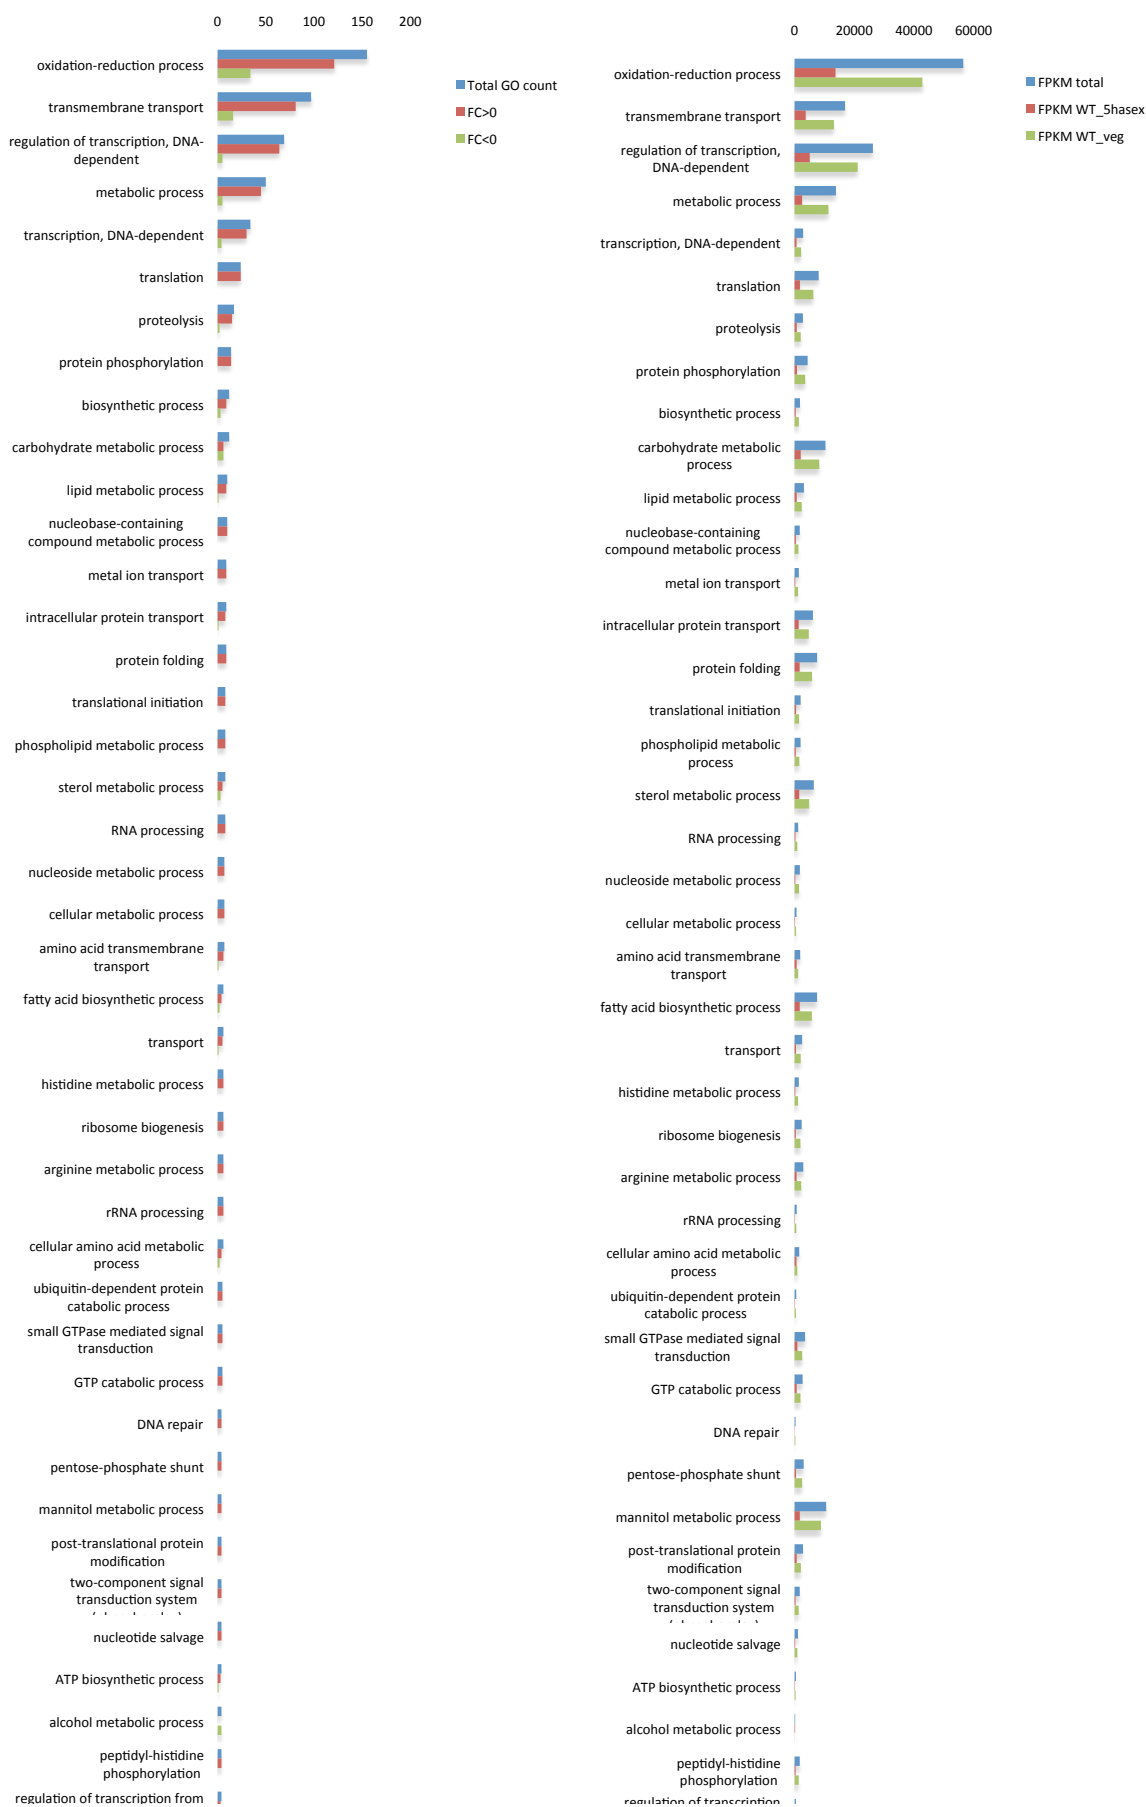

## Supplementary table 4

### PKS

| test_id | Chromosome                 | Coordinate | sample_1  | sample_2 | status | value_1   | value_2   | log2FC       | test_stat    | p_value     | q_value     | significant |
|---------|----------------------------|------------|-----------|----------|--------|-----------|-----------|--------------|--------------|-------------|-------------|-------------|
| AN6448  | ChrI_A_nidulans_FGSC_A4    | 139084     | WT_5hasex | WT_veg   | NOTEST | 0,0523149 | 0,0801571 | 0,61561      | -0,341791    | 0,732508    | 1           | no          |
| AN6431  | ChrI_A_nidulans_FGSC_A4    | 206270     | WT_5hasex | WT_veg   | NOTEST | 0,171107  | 0,102063  | -0,745443    | 0,506798     | 0,612297    | 1           | no          |
| aptA    | ChrI_A_nidulans_FGSC_A4    | 1543569    | WT_5hasex | WT_veg   | NOTEST | 2,00403   | 1,08806   | -0,881139    | 1,21654      | 0,223778    | 1           | no          |
| AN6791  | ChrI_A_nidulans_FGSC_A4    | 3181547    | WT_5hasex | WT_veg   | OK     | 1,33517   | 5,89848   | 2,14332      | -3,39365     | 0,000689676 | 0,00572114  | yes         |
| AN7903  | ChrII_A_nidulans_FGSC_A4   | 186498     | WT_5hasex | WT_veg   | NOTEST | 0,402043  | 0,109003  | -1,88298     | 1,29829      | 0,194188    | 1           | no          |
| orsA    | ChrII_A_nidulans_FGSC_A4   | 207765     | WT_5hasex | WT_veg   | NOTEST | 0,928521  | 1,32677   | 0,514906     | -0,718548    | 0,47242     | 1           | no          |
| wA      | ChrII_A_nidulans_FGSC_A4   | 1139654    | WT_5hasex | WT_veg   | NOTEST | 1,38375   | 1,90912   | 0,46432      | -0,692921    | 0,488359    | 1           | no          |
| AN3612  | ChrII_A_nidulans_FGSC_A4   | 3604240    | WT_5hasex | WT_veg   | NOTEST | 0,374937  | 0         | -1.79769e+30 | -1.79769e+30 | 0,017128    | 1           | no          |
| AN10430 | ChrII_A_nidulans_FGSC_A4   | 3614405    | WT_5hasex | WT_veg   | NOTEST | 0,0394718 | 0         | -1.79769e+30 | -1.79769e+30 | 0,23809     | 1           | no          |
| AN7084  | ChrIV_A_nidulans_FGSC_A4   | 1079493    | WT_5hasex | WT_veg   | NOTEST | 1,08013   | 0,945758  | -0,191666    | 0,264723     | 0,791223    | 1           | no          |
| AN7071  | ChrIV_A_nidulans_FGSC_A4   | 1123409    | WT_5hasex | WT_veg   | NOTEST | 0,0951869 | 0,105933  | 0,154316     | -0,0953589   | 0,92403     | 1           | no          |
| AN12065 | ChrIV_A_nidulans_FGSC_A4   | 1288230    | WT_5hasex | WT_veg   | NOTEST | 1,16545   | 0         | -1.79769e+30 | -1.79769e+30 | 0,0374675   | 1           | no          |
| AN7489  | ChrIV_A_nidulans_FGSC_A4   | 1703510    | WT_5hasex | WT_veg   | OK     | 18,2778   | 19,1664   | 0,0684817    | -0,123393    | 0,901796    | 0,962187    | no          |
| stcJ    | ChrIV_A_nidulans_FGSC_A4   | 2761767    | WT_5hasex | WT_veg   | OK     | 4,13231   | 3,07994   | -0,424049    | 0,730417     | 0,465136    | 0,724125    | no          |
| stcA    | ChrIV_A_nidulans_FGSC_A4   | 2783097    | WT_5hasex | WT_veg   | NOTEST | 0,418271  | 0,251943  | -0,731344    | 0,740438     | 0,459034    | 1           | no          |
| AN12331 | ChrIV_A_nidulans_FGSC_A4   | 2825115    | WT_5hasex | WT_veg   | OK     | 5,72154   | 0,241462  | -4,56653     | 5,42499      | 5,79586E-08 | 1,42656E-06 | yes         |
| ausA    | ChrV_A_nidulans_FGSC_A4    | 307998     | WT_5hasex | WT_veg   | NOTEST | 0,193591  | 0         | -1.79769e+30 | -1.79769e+30 | 0,0299414   | 1           | no          |
| apdA    | ChrV_A_nidulans_FGSC_A4    | 396315     | WT_5hasex | WT_veg   | OK     | 10,4226   | 0,670061  | -3,95928     | 7,44698      | 9,54792E-14 | 6,06461E-12 | yes         |
| AN5475  | ChrV_A_nidulans_FGSC_A4    | 2685267    | WT_5hasex | WT_veg   | NOTEST | 0,267086  | 0         | -1.79769e+30 | -1.79769e+30 | 0,165569    | 1           | no          |
| AN11191 | ChrVI_A_nidulans_FGSC_A4   | 65976      | WT_5hasex | WT_veg   | NOTEST | 0,483246  | 0,106128  | -2,18696     | 1,46896      | 0,141843    | 1           | no          |
| AN3386  | ChrVI_A_nidulans_FGSC_A4   | 877707     | WT_5hasex | WT_veg   | NOTEST | 0,883255  | 0,999292  | 0,178078     | -0,24948     | 0,80299     | 1           | no          |
| AN3273  | ChrVI_A_nidulans_FGSC_A4   | 1263713    | WT_5hasex | WT_veg   | NOTEST | 0,141958  | 0,0343146 | -2,04857     | 0,673175     | 0,500836    | 1           | no          |
| AN3230  | ChrVI_A_nidulans_FGSC_A4   | 1392710    | WT_5hasex | WT_veg   | OK     | 25,8811   | 8,37504   | -1,62773     | 2,56692      | 0,0102607   | 0,0531618   | no          |
| AN9005  | ChrVII_A_nidulans_FGSC_A4  | 152385     | WT_5hasex | WT_veg   | OK     | 0,496982  | 4,36502   | 3,13472      | -4,13723     | 3,51517E-05 | 0,000440464 | yes         |
| AN8910  | ChrVII_A_nidulans_FGSC_A4  | 481319     | WT_5hasex | WT_veg   | OK     | 5,96852   | 19,983    | 1,74333      | -3,55629     | 0,000376124 | 0,00340833  | yes         |
| AN1784  | ChrVII_A_nidulans_FGSC_A4  | 1869035    | WT_5hasex | WT_veg   | NOTEST | 0,0890433 | 0,0488626 | -0,865778    | 0,505019     | 0,613546    | 1           | no          |
| AN2032  | ChrVII_A_nidulans_FGSC_A4  | 2640607    | WT_5hasex | WT_veg   | OK     | 2,08645   | 0,403534  | -2,37029     | 3,0029       | 0,00267424  | 0,017755    | yes         |
| AN2035  | ChrVII_A_nidulans_FGSC_A4  | 2650660    | WT_5hasex | WT_veg   | NOTEST | 1,3717    | 0,151016  | -3,1832      | 2,85961      | 0,00424157  | 1           | no          |
| easB    | ChrVII_A_nidulans_FGSC_A4  | 4313089    | WT_5hasex | WT_veg   | OK     | 36,9728   | 20,2898   | -0,865708    | 1,55704      | 0,11946     | 0,326719    | no          |
| afog    | ChrVIII_A_nidulans_FGSC_A4 | 1721736    | WT_5hasex | WT_veg   | NOTEST | 0,0641172 | 0,20641   | 1,68673      | -1,23155     | 0,218117    | 1           | no          |
| afoe    | ChrVIII_A_nidulans_FGSC_A4 | 1734327    | WT_5hasex | WT_veg   | NOTEST | 0,767892  | 0,102947  | -2,899       | 2,03069      | 0,0422866   | 1           | no          |
| AN0523  | ChrVIII_A_nidulans_FGSC_A4 | 3279991    | WT_5hasex | WT_veg   | NOTEST | 0,186924  | 0,0807291 | -1,21129     | 0,776755     | 0,437303    | 1           | no          |
| mdpG    | ChrVIII_A_nidulans_FGSC_A4 | 4443883    | WT_5hasex | WT_veg   | NOTEST | 1,14865   | 2,27147   | 0,983688     | -1,38197     | 0,166981    | 1           | no          |

### NRPS

| test_id | Chromosome                | Coordinate | sample_1  | sample_2 | status | value_1  | value_2  | log2FC    | test_stat | p_value     | q_value     | significant |
|---------|---------------------------|------------|-----------|----------|--------|----------|----------|-----------|-----------|-------------|-------------|-------------|
| AN6444  | ChrI_A_nidulans_FGSC_A4   | 155232     | WT_5hasex | WT_veg   | NOTEST | 0,215656 | 0,195057 | -0,144842 | 0,0872848 | 0,930445    | 1           | no          |
| AN6236  | ChrI_A_nidulans_FGSC_A4   | 797657     | WT_5hasex | WT_veg   | OK     | 12,9608  | 2,96456  | -2,12826  | 4,25653   | 0,000020762 | 0,000275506 | yes         |
| AN7884  | ChrII_A_nidulans_FGSC_A4  | 118327     | WT_5hasex | WT_veg   | NOTEST | 0,956073 | 0,235559 | -2,02103  | 3,13753   | 0,00170376  | 1           | no          |
| AN8105  | ChrII_A_nidulans_FGSC_A4  | 766659     | WT_5hasex | WT_veg   | NOTEST | 0        | 0        | 0         | 0         | 1           | 1           | no          |
| AN10486 | ChrII_A_nidulans_FGSC_A4  | 2673330    | WT_5hasex | WT_veg   | OK     | 3,95773  | 6,82228  | 0,785582  | -1,26859  | 0,204588    | 0,460874    | no          |
| inpB    | ChrII_A_nidulans_FGSC_A4  | 3983380    | WT_5hasex | WT_veg   | NOTEST | 0,200368 | 0,222299 | 0,149853  | -0,135066 | 0,89256     | 1           | no          |
| inpA    | ChrII_A_nidulans_FGSC_A4  | 3991242    | WT_5hasex | WT_veg   | NOTEST | 0,08683  | 0,218684 | 1,33258   | -0,841159 | 0,400259    | 1           | no          |
| AN4827  | ChrIII_A_nidulans_FGSC_A4 | 857929     | WT_5hasex | WT_veg   | NOTEST | 1,27456  | 2,68656  | 1,07577   | -1,40251  | 0,160763    | 1           | no          |
| ivoA    | ChrIII_A_nidulans_FGSC_A4 | 1433761    | WT_5hasex | WT_veg   | NOTEST | 0,773135 | 1,10822  | 0,519452  | -0,683505 | 0,494288    | 1           | no          |

## Supplementary table 4

|         |                            |         |           |        |        |           |           |              |              |             |             |     |
|---------|----------------------------|---------|-----------|--------|--------|-----------|-----------|--------------|--------------|-------------|-------------|-----|
| tdiA    | ChrV_A_nidulans_FGSC_A4    | 735712  | WT_5hasex | WT_veg | NOTEST | 0,0818122 | 0         | -1.79769e+30 | -1.79769e+30 | 0,224063    | 1           | no  |
| AN5318  | ChrV_A_nidulans_FGSC_A4    | 3160321 | WT_5hasex | WT_veg | OK     | 50,1556   | 224,264   | 2,16072      | -4,03635     | 5,42881E-05 | 0,000643475 | yes |
| AN9226  | ChrVI_A_nidulans_FGSC_A4   | 29166   | WT_5hasex | WT_veg | NOTEST | 0,334157  | 0,0943214 | -1,82487     | 1,23681      | 0,216158    | 1           | no  |
| AN9129  | ChrVI_A_nidulans_FGSC_A4   | 357610  | WT_5hasex | WT_veg | OK     | 3,79577   | 0         | -1.79769e+30 | -1.79769e+30 | 0,00501028  | 0,0297861   | yes |
| AN3396  | ChrVI_A_nidulans_FGSC_A4   | 841204  | WT_5hasex | WT_veg | OK     | 21,9492   | 14,7316   | -0,575258    | 1,17687      | 0,239247    | 0,505083    | no  |
| AN2924  | ChrVI_A_nidulans_FGSC_A4   | 2380864 | WT_5hasex | WT_veg | OK     | 9,60139   | 5,48562   | -0,807589    | 1,29454      | 0,19548     | 0,448164    | no  |
| acvA    | ChrVI_A_nidulans_FGSC_A4   | 3362470 | WT_5hasex | WT_veg | NOTEST | 0,159556  | 0,0689839 | -1,20973     | 0,809966     | 0,417959    | 1           | no  |
| AN1680  | ChrVII_A_nidulans_FGSC_A4  | 1593566 | WT_5hasex | WT_veg | OK     | 3,13009   | 4,49235   | 0,521267     | -0,844754    | 0,398248    | 0,670819    | no  |
| AN2064  | ChrVII_A_nidulans_FGSC_A4  | 2734447 | WT_5hasex | WT_veg | OK     | 16,7536   | 66,7541   | 1,99439      | -3,70912     | 0,000207985 | 0,00206261  | yes |
| easA    | ChrVII_A_nidulans_FGSC_A4  | 4288452 | WT_5hasex | WT_veg | OK     | 4,10882   | 7,34863   | 0,838751     | -1,59232     | 0,111313    | 0,311608    | no  |
| AN9244  | ChrVIII_A_nidulans_FGSC_A4 | 43422   | WT_5hasex | WT_veg | NOTEST | 0,127532  | 0,36678   | 1,52405      | -1,48372     | 0,137884    | 1           | no  |
| AN11820 | ChrVIII_A_nidulans_FGSC_A4 | 186926  | WT_5hasex | WT_veg | NOTEST | 0,748342  | 0         | -1.79769e+30 | -1.79769e+30 | 0,0261488   | 1           | no  |
| AN1242  | ChrVIII_A_nidulans_FGSC_A4 | 1072960 | WT_5hasex | WT_veg | NOTEST | 0,94576   | 0,343445  | -1,46139     | 2,33641      | 0,0194698   | 1           | no  |
| sidC    | ChrVIII_A_nidulans_FGSC_A4 | 2999412 | WT_5hasex | WT_veg | OK     | 3,67754   | 1,99965   | -0,878995    | 1,80783      | 0,0706337   | 0,227043    | no  |

### DMAT

| test_id | Chromosome               | Coordinate | sample_1  | sample_2 | status | value_1  | value_2 | log2FC       | test_stat    | p_value   | q_value  | significant |
|---------|--------------------------|------------|-----------|----------|--------|----------|---------|--------------|--------------|-----------|----------|-------------|
| xptA    | ChrI_A_nidulans_FGSC_A4  | 3155576    | WT_5hasex | WT_veg   | NOTEST | 0,712189 | 0       | -1.79769e+30 | -1.79769e+30 | 0,0399057 | 1        | no          |
| AN11080 | ChrV_A_nidulans_FGSC_A4  | 636591     | WT_5hasex | WT_veg   | OK     | 8,69101  | 6,98892 | -0,314454    | 0,48241      | 0,629515  | 0,830133 | no          |
| tdiB    | ChrV_A_nidulans_FGSC_A4  | 739014     | WT_5hasex | WT_veg   | NOTEST | 0,7938   | 0       | -1.79769e+30 | -1.79769e+30 | 0,0374437 | 1        | no          |
| AN11202 | ChrVI_A_nidulans_FGSC_A4 | 18451      | WT_5hasex | WT_veg   | NOTEST | 0,25124  | 0       | -1.79769e+30 | -1.79769e+30 | 0,137528  | 1        | no          |
| AN11194 | ChrVI_A_nidulans_FGSC_A4 | 20153      | WT_5hasex | WT_veg   | NOTEST | 0        | 0       | 0            | 0            | 0         | 1        | no          |

### Diterpene synthases

| test_id | Chromosome                 | Coordinate | sample_1  | sample_2 | status | value_1   | value_2   | log2FC       | test_stat    | p_value   | q_value | significant |
|---------|----------------------------|------------|-----------|----------|--------|-----------|-----------|--------------|--------------|-----------|---------|-------------|
| AN3252  | ChrVI_A_nidulans_FGSC_A4   | 1332079    | WT_5hasex | WT_veg   | NOTEST | 0,0676332 | 0         | -1.79769e+30 | -1.79769e+30 | 0,23809   | 1       | no          |
| AN1594  | ChrVII_A_nidulans_FGSC_A4  | 1284404    | WT_5hasex | WT_veg   | NOTEST | 0,0806641 | 0,0611783 | -0,398906    | 0,114813     | 0,908593  | 1       | no          |
| AN9314  | ChrVIII_A_nidulans_FGSC_A4 | 252332     | WT_5hasex | WT_veg   | NOTEST | 0,227169  | 0         | -1.79769e+30 | -1.79769e+30 | 0,0537957 | 1       | no          |
